# Supplementary material for: Incorporating the Thiazolo[5,4-d]thiazole Unit into a Coordination Polymer with Interdigitated Structure
Source: Preprints.org preprint supplement (doi:10.20944/preprints201712.0162.v1), 2017-12-22
Supplement: Supplementary file 2 [file supplementary]

Archive with 5 entries (5 files):
- BpTzTz-fin.cif
- checkcif Zn-BpTzTz-Isopht.pdf
- checkcif-Dptztz.pdf
- Supp crystals_Dptztz-CID.doc
- Zn-BpTzTz-Isopht-fin.cif
