# Supplementary material for: Incorporating the Thiazolo[5,4-d]thiazole Unit into a Coordination Polymer with Interdigitated Structure
Source: Preprints.org preprint supplement (doi:10.20944/preprints201712.0162.v1), 2017-12-22
Supplement: Supplementary file 2 [file supplementary › BpTzTz-fin.cif]

 
data_BpTzTz
 
_audit_creation_method            'SHELXL-2014/7'
_shelx_SHELXL_version_number      '2014/7'
_chemical_name_systematic         
'2,5-Di(4-pyridyl)thiazolo[5,4-d]thiazole'
_chemical_name_common             dptztz
_chemical_melting_point           ?
_chemical_formula_moiety          'C14 H8 N4 S2'
_chemical_formula_sum             'C14 H8 N4 S2'
_chemical_formula_weight          296.36

loop_
 _atom_type_symbol
 _atom_type_description
 _atom_type_scat_dispersion_real
 _atom_type_scat_dispersion_imag
 _atom_type_scat_source
 'C'  'C'   0.0033   0.0016
 'International Tables Vol C Tables 4.2.6.8 and 6.1.1.4'
 'H'  'H'   0.0000   0.0000
 'International Tables Vol C Tables 4.2.6.8 and 6.1.1.4'
 'S'  'S'   0.1246   0.1234
 'International Tables Vol C Tables 4.2.6.8 and 6.1.1.4'
 'N'  'N'   0.0061   0.0033
 'International Tables Vol C Tables 4.2.6.8 and 6.1.1.4'
 
_space_group_crystal_system       monoclinic
_space_group_IT_number            14
_space_group_name_H-M_alt         'P 21/c'
_space_group_name_Hall            '-P 2ybc'
 
_shelx_space_group_comment
;
The symmetry employed for this shelxl refinement is uniquely defined
by the following loop, which should always be used as a source of
symmetry information in preference to the above space-group names.
They are only intended as comments.
;
 
loop_
 _space_group_symop_operation_xyz
 'x, y, z'
 '-x, y+1/2, -z+1/2'
 '-x, -y, -z'
 'x, -y-1/2, z-1/2'
 
_cell_length_a                    8.3873(5)
_cell_length_b                    6.3140(3)
_cell_length_c                    11.7170(6)
_cell_angle_alpha                 90
_cell_angle_beta                  93.699(3)
_cell_angle_gamma                 90
_cell_volume                      619.21(6)
_cell_formula_units_Z             2
_cell_measurement_temperature     100(2)
_cell_measurement_reflns_used     4670
_cell_measurement_theta_min       2.433
_cell_measurement_theta_max       35.973
 
_exptl_crystal_description        block
_exptl_crystal_colour             yellow
_exptl_crystal_density_meas       ? 
_exptl_crystal_density_method     'not measured'
_exptl_crystal_density_diffrn     1.590
_exptl_crystal_F_000              304
_exptl_transmission_factor_min    ?
_exptl_transmission_factor_max    ?
_exptl_crystal_size_max           0.100
_exptl_crystal_size_mid           0.050
_exptl_crystal_size_min           0.050
_exptl_absorpt_coefficient_mu     0.423
_shelx_estimated_absorpt_T_min    0.959
_shelx_estimated_absorpt_T_max    0.979
_exptl_absorpt_correction_type    multi-scan
_exptl_absorpt_correction_T_min   0.6330
_exptl_absorpt_correction_T_max   0.7471
_exptl_absorpt_process_details    '(<i>SADABS</i>; Sheldrick, 2012)'
 
_exptl_special_details            ?
 
_diffrn_ambient_temperature       100(2)
_diffrn_radiation_wavelength      0.71073
_diffrn_radiation_type            MoK\a
_diffrn_radiation_source          'microfocus sealed tube'
_diffrn_radiation_monochromator   'multilayer mirror'
_diffrn_measurement_device_type   'Bruker Kappa APEX-II CCD area detector'
_diffrn_measurement_method        '\w scans'
_diffrn_detector_area_resol_mean  ?
_diffrn_reflns_number             6837
_diffrn_reflns_av_unetI/netI      0.0470
_diffrn_reflns_av_R_equivalents   0.0492
_diffrn_reflns_limit_h_min        -10
_diffrn_reflns_limit_h_max        10
_diffrn_reflns_limit_k_min        -8
_diffrn_reflns_limit_k_max        8
_diffrn_reflns_limit_l_min        -14
_diffrn_reflns_limit_l_max        14
_diffrn_reflns_theta_min          2.433
_diffrn_reflns_theta_max          26.999
_diffrn_reflns_theta_full         25.242
_diffrn_measured_fraction_theta_max   0.716
_diffrn_measured_fraction_theta_full  0.696
_diffrn_reflns_Laue_measured_fraction_max    0.716
_diffrn_reflns_Laue_measured_fraction_full   0.696
_diffrn_reflns_point_group_measured_fraction_max   0.716
_diffrn_reflns_point_group_measured_fraction_full  0.696
_reflns_number_total              965
_reflns_number_gt                 847
_reflns_threshold_expression      'I > 2\s(I)'
_reflns_Friedel_coverage          0.000
_reflns_Friedel_fraction_max      .
_reflns_Friedel_fraction_full     .
 
_reflns_special_details
;
 Reflections were merged by SHELXL according to the crystal
 class for the calculation of statistics and refinement.
 
 _reflns_Friedel_fraction is defined as the number of unique
 Friedel pairs measured divided by the number that would be
 possible theoretically, ignoring centric projections and
 systematic absences.
;
 
_computing_data_collection        'APEX2 (Bruker, 2014)'
_computing_cell_refinement        'SAINT (Bruker, 2015)'
_computing_data_reduction         'SAINT (Bruker, 2015)'
_computing_structure_solution     'SHELXL-2014 (Sheldrick, 2014)'
_computing_structure_refinement   'SHELXL-2014/7 (Sheldrick, 2014)'
_computing_molecular_graphics     'DIAMOND 3.2 (Crystal Impact, 2015)'
_computing_publication_material   'SHELXL-2014 (Sheldrick, 2014)'
 
_publ_section_references
;
Bruker AXS. (2014). APEX2. Bruker AXS Inc., Madison, Wisconsin, USA.
Bruker AXS. (2015). SAINT. Bruker AXS Inc., Madison, Wisconsin, USA.
Bruker AXS. (2015). SADABS. Bruker AXS Inc., Madison, Wisconsin, USA.
Crystal Impact. (2015) DIAMOND 3.2k. Crystal Impact GbR, Bonn, Germany.
Sheldrick, G. M. (1996). <i>SADABS</i>. University of G\"ottingen, Germany.
Sheldrick, G. M. (2008). Acta Cryst. A64, 112-122. 
;
 
_publ_section_exptl_refinement
;
The aromatic hydrogen atoms for CH were positioned geometrically
(C---H = 0.95 \%A) and refined using a riding model
(AFIX 43) with U~iso~(H) = 1.2U~eq~.
;
 
_refine_special_details
;
 Refinement of F^2^ against ALL reflections. The weighted R-factor wR and
 goodness of fit S are based on F^2^, conventional R-factors R are based
 on F, with F set to zero for negative F^2^. The threshold expression of
 F^2^ > 2sigma(F^2^) is used only for calculating R-factors(gt) etc. and is
 not relevant to the choice of reflections for refinement.  R-factors based
 on F^2^ are statistically about twice as large as those based on F, and R-
 factors based on ALL data will be even larger.
;
 
_refine_ls_structure_factor_coef  Fsqd
_refine_ls_matrix_type            full
_refine_ls_weighting_scheme       calc
_refine_ls_weighting_details
'w=1/[\s^2^(Fo^2^)+(0.0338P)^2^] where P=(Fo^2^+2Fc^2^)/3'
_atom_sites_solution_primary      direct
_atom_sites_solution_secondary    difmap
_atom_sites_solution_hydrogens    geom
_refine_ls_hydrogen_treatment     constr
_refine_ls_extinction_method      none
_refine_ls_extinction_coef        .
_refine_ls_number_reflns          965
_refine_ls_number_parameters      91
_refine_ls_number_restraints      0
_refine_ls_R_factor_all           0.0359
_refine_ls_R_factor_gt            0.0284
_refine_ls_wR_factor_ref          0.0699
_refine_ls_wR_factor_gt           0.0675
_refine_ls_goodness_of_fit_ref    1.067
_refine_ls_restrained_S_all       1.067
_refine_ls_shift/su_max           0.001
_refine_ls_shift/su_mean          0.000
 
loop_
 _atom_site_label
 _atom_site_type_symbol
 _atom_site_fract_x
 _atom_site_fract_y
 _atom_site_fract_z
 _atom_site_U_iso_or_equiv
 _atom_site_adp_type
 _atom_site_occupancy
 _atom_site_site_symmetry_order  
 _atom_site_calc_flag
 _atom_site_refinement_flags_posn
 _atom_site_refinement_flags_adp
 _atom_site_refinement_flags_occupancy
 _atom_site_disorder_assembly
 _atom_site_disorder_group
S S 0.56499(5) 0.89464(7) 0.84350(3) 0.01359(15) Uani 1 1 d . . . . .
N1 N 0.9389(2) 0.1972(2) 0.88159(13) 0.0156(3) Uani 1 1 d . . . . .
N2 N 0.61382(18) 0.7807(2) 1.05832(12) 0.0126(3) Uani 1 1 d . . . . .
C1 C 0.8777(2) 0.2243(3) 0.98371(14) 0.0149(4) Uani 1 1 d . . . . .
H1 H 0.9004 0.1201 1.0409 0.018 Uiso 1 1 calc R U . . .
C2 C 0.7835(2) 0.3956(3) 1.01066(14) 0.0136(4) Uani 1 1 d . . . . .
H2 H 0.7449 0.4088 1.0848 0.016 Uiso 1 1 calc R U . . .
C3 C 0.7467(2) 0.5474(3) 0.92716(14) 0.0115(4) Uani 1 1 d . . . . .
C4 C 0.8080(2) 0.5207(3) 0.82002(13) 0.0126(4) Uani 1 1 d . . . . .
H4 H 0.7847 0.6200 0.7603 0.015 Uiso 1 1 calc R U . . .
C5 C 0.9040(2) 0.3454(3) 0.80283(14) 0.0148(4) Uani 1 1 d . . . . .
H5 H 0.9475 0.3303 0.7304 0.018 Uiso 1 1 calc R U . . .
C6 C 0.6474(2) 0.7309(3) 0.95340(14) 0.0117(4) Uani 1 1 d . . . . .
C7 C 0.5204(2) 0.9568(3) 1.05299(13) 0.0121(4) Uani 1 1 d . . . . .
 
loop_
 _atom_site_aniso_label
 _atom_site_aniso_U_11
 _atom_site_aniso_U_22
 _atom_site_aniso_U_33
 _atom_site_aniso_U_23
 _atom_site_aniso_U_13
 _atom_site_aniso_U_12
S 0.0168(3) 0.0144(3) 0.0095(2) 0.00065(15) 0.00063(17) 0.00526(18)
N1 0.0175(8) 0.0155(8) 0.0135(6) -0.0018(6) -0.0006(6) 0.0023(6)
N2 0.0130(7) 0.0113(7) 0.0134(6) 0.0006(6) 0.0006(6) 0.0022(6)
C1 0.0174(9) 0.0142(9) 0.0126(7) 0.0012(7) -0.0010(7) 0.0015(7)
C2 0.0149(9) 0.0153(9) 0.0106(7) 0.0000(6) 0.0011(7) -0.0013(7)
C3 0.0086(8) 0.0114(9) 0.0140(8) -0.0011(6) -0.0028(7) -0.0013(6)
C4 0.0137(8) 0.0120(9) 0.0118(7) 0.0006(6) -0.0017(7) -0.0012(7)
C5 0.0163(9) 0.0172(9) 0.0111(7) -0.0015(7) 0.0010(7) 0.0020(7)
C6 0.0111(8) 0.0105(8) 0.0133(7) 0.0013(6) -0.0010(7) -0.0009(7)
C7 0.0124(9) 0.0125(8) 0.0114(8) 0.0000(6) 0.0000(7) 0.0006(7)
 
_geom_special_details
;
 All esds (except the esd in the dihedral angle between two l.s. planes)
 are estimated using the full covariance matrix.  The cell esds are taken
 into account individually in the estimation of esds in distances, angles
 and torsion angles; correlations between esds in cell parameters are only
 used when they are defined by crystal symmetry.  An approximate (isotropic)
 treatment of cell esds is used for estimating esds involving l.s. planes.
;
 
loop_
 _geom_bond_atom_site_label_1
 _geom_bond_atom_site_label_2
 _geom_bond_distance
 _geom_bond_site_symmetry_2
 _geom_bond_publ_flag
S C7 1.7250(16) 3_677 ?
S C6 1.7578(17) . ?
N1 C5 1.333(2) . ?
N1 C1 1.343(2) . ?
N2 C6 1.317(2) . ?
N2 C7 1.359(2) . ?
C1 C2 1.388(2) . ?
C1 H1 0.9500 . ?
C2 C3 1.390(2) . ?
C2 H2 0.9500 . ?
C3 C4 1.397(2) . ?
C3 C6 1.471(2) . ?
C4 C5 1.391(2) . ?
C4 H4 0.9500 . ?
C5 H5 0.9500 . ?
C7 C7 1.379(3) 3_677 ?
C7 S 1.7250(16) 3_677 ?
 
loop_
 _geom_angle_atom_site_label_1
 _geom_angle_atom_site_label_2
 _geom_angle_atom_site_label_3
 _geom_angle
 _geom_angle_site_symmetry_1
 _geom_angle_site_symmetry_3
 _geom_angle_publ_flag
C7 S C6 88.06(8) 3_677 . ?
C5 N1 C1 116.61(16) . . ?
C6 N2 C7 108.06(14) . . ?
N1 C1 C2 123.92(16) . . ?
N1 C1 H1 118.0 . . ?
C2 C1 H1 118.0 . . ?
C1 C2 C3 118.75(15) . . ?
C1 C2 H2 120.6 . . ?
C3 C2 H2 120.6 . . ?
C2 C3 C4 118.12(15) . . ?
C2 C3 C6 119.94(14) . . ?
C4 C3 C6 121.93(15) . . ?
C5 C4 C3 118.43(15) . . ?
C5 C4 H4 120.8 . . ?
C3 C4 H4 120.8 . . ?
N1 C5 C4 124.15(15) . . ?
N1 C5 H5 117.9 . . ?
C4 C5 H5 117.9 . . ?
N2 C6 C3 122.78(15) . . ?
N2 C6 S 116.47(13) . . ?
C3 C6 S 120.75(12) . . ?
N2 C7 C7 118.27(18) . 3_677 ?
N2 C7 S 132.59(12) . 3_677 ?
C7 C7 S 109.14(16) 3_677 3_677 ?
 
loop_
 _geom_torsion_atom_site_label_1
 _geom_torsion_atom_site_label_2
 _geom_torsion_atom_site_label_3
 _geom_torsion_atom_site_label_4
 _geom_torsion
 _geom_torsion_site_symmetry_1
 _geom_torsion_site_symmetry_2
 _geom_torsion_site_symmetry_3
 _geom_torsion_site_symmetry_4
 _geom_torsion_publ_flag
C5 N1 C1 C2 -0.5(3) . . . . ?
N1 C1 C2 C3 1.3(3) . . . . ?
C1 C2 C3 C4 -0.6(2) . . . . ?
C1 C2 C3 C6 -179.84(17) . . . . ?
C2 C3 C4 C5 -0.7(2) . . . . ?
C6 C3 C4 C5 178.52(16) . . . . ?
C1 N1 C5 C4 -1.0(3) . . . . ?
C3 C4 C5 N1 1.6(3) . . . . ?
C7 N2 C6 C3 -179.92(15) . . . . ?
C7 N2 C6 S -0.6(2) . . . . ?
C2 C3 C6 N2 12.5(3) . . . . ?
C4 C3 C6 N2 -166.70(17) . . . . ?
C2 C3 C6 S -166.78(13) . . . . ?
C4 C3 C6 S 14.0(2) . . . . ?
C7 S C6 N2 0.42(15) 3_677 . . . ?
C7 S C6 C3 179.75(15) 3_677 . . . ?
C6 N2 C7 C7 0.5(3) . . . 3_677 ?
C6 N2 C7 S -179.77(15) . . . 3_677 ?
 
loop_
 _geom_hbond_atom_site_label_D 
 _geom_hbond_atom_site_label_H 
 _geom_hbond_atom_site_label_A 
 _geom_hbond_distance_DH 
 _geom_hbond_distance_HA 
 _geom_hbond_distance_DA 
 _geom_hbond_angle_DHA 
 _geom_hbond_site_symmetry_A 
C1 H1 N1  0.95 2.55 3.410(2) 150.8 3_757
 
_refine_diff_density_max    0.238
_refine_diff_density_min   -0.182
_refine_diff_density_rms    0.045

_shelx_res_file
;

    BpTzTz.res created by SHELXL-2014/7

TITL BpTzTz in P2(1)/c
CELL 0.71073 8.3873 6.3140 11.7170 90.000 93.699 90.000
ZERR 2.00 0.0005 0.0003 0.0006 0.000 0.003 0.000
LATT 1
SYMM -x, y+1/2, -z+1/2
SFAC C H S N
UNIT 28 16 4 8
LIST 4 ! automatically inserted. Change 6 to 4 for CHECKCIF!!
TEMP -173.150
SIZE 0.050 0.050 0.100
ACTA
OMIT -5 54
OMIT 1 0 10
OMIT 2 4 1
OMIT -4 2 4
OMIT -3 3 5
OMIT 6 3 3
L.S. 8
FMAP 2
PLAN -5 0 0.00
HTAB
EQIV $1 -x+2, -y, -z+2
HTAB C1 N1_$1
BOND $H
CONF
WGHT    0.033800
FVAR       0.27724
S     3    0.564986    0.894640    0.843500    11.00000    0.01681    0.01440 =
         0.00953    0.00065    0.00063    0.00526
N1    4    0.938869    0.197196    0.881592    11.00000    0.01750    0.01553 =
         0.01345   -0.00184   -0.00058    0.00234
N2    4    0.613818    0.780737    1.058316    11.00000    0.01299    0.01130 =
         0.01343    0.00058    0.00055    0.00215
C1    1    0.877743    0.224329    0.983711    11.00000    0.01745    0.01423 =
         0.01262    0.00116   -0.00095    0.00153
AFIX  43
H1    2    0.900354    0.120056    1.040929    11.00000   -1.20000
AFIX   0
C2    1    0.783516    0.395586    1.010661    11.00000    0.01488    0.01527 =
         0.01057   -0.00003    0.00108   -0.00130
AFIX  43
H2    2    0.744907    0.408837    1.084787    11.00000   -1.20000
AFIX   0
C3    1    0.746682    0.547375    0.927161    11.00000    0.00863    0.01145 =
         0.01405   -0.00107   -0.00283   -0.00129
C4    1    0.808029    0.520723    0.820023    11.00000    0.01372    0.01196 =
         0.01182    0.00060   -0.00172   -0.00116
AFIX  43
H4    2    0.784739    0.619987    0.760333    11.00000   -1.20000
AFIX   0
C5    1    0.904015    0.345400    0.802828    11.00000    0.01631    0.01717 =
         0.01107   -0.00148    0.00096    0.00198
AFIX  43
H5    2    0.947487    0.330300    0.730383    11.00000   -1.20000
AFIX   0
C6    1    0.647375    0.730887    0.953402    11.00000    0.01112    0.01054 =
         0.01327    0.00127   -0.00099   -0.00091
C7    1    0.520363    0.956767    1.052990    11.00000    0.01244    0.01247 =
         0.01139    0.00003    0.00004    0.00058
HKLF 4 1 1 0 0 0 1 0 0 0 1

REM  BpTzTz in P2(1)/c
REM R1 =  0.0284 for     847 Fo > 4sig(Fo)  and  0.0359 for all     965 data
REM     91 parameters refined using      0 restraints

END

WGHT      0.0339      0.0000

REM Instructions for potential hydrogen bonds
HTAB C1 N1_$1

REM Highest difference peak  0.238,  deepest hole -0.182,  1-sigma level  0.045
Q1    1   0.5003  0.9725  0.8853  11.00000  0.05    0.24
Q2    1   0.6972  0.6425  0.9415  11.00000  0.05    0.24
Q3    1   0.5503  1.0072  0.8962  11.00000  0.05    0.21
Q4    1   0.8633  0.3277  1.0148  11.00000  0.05    0.18
Q5    1   0.5913  0.7210  0.9997  11.00000  0.05    0.18
;
_shelx_res_checksum   96426

_shelx_hkl_file
;
   0  -1   0   -0.24    0.17
   0  -1   0   -0.02    0.09
   0   1   0    0.02    0.14
   0   1   0    0.03    0.12
   0   1   0    0.14    0.25
   0  -1   0   -0.03    0.16
   0  -1   0   -0.06    0.13
   0   2   0   13.39    1.01
   0   2   0   12.97    1.31
   0   2   0   13.81    1.06
   0  -2   0   13.68    1.29
   0  -2   0   13.33    0.81
   0  -2   0   11.49    0.97
   0  -2   0   13.20    1.05
   0  -3   0    0.02    0.31
   0   3   0   -0.05    0.16
   0  -3   0   -0.04    0.37
   0  -3   0    0.08    0.18
   0   3   0    0.32    0.49
   0  -3   0   -0.22    0.26
   0   3   0    0.00    0.25
   0   4   0    1.25    0.48
   0   4   0    1.12    0.65
   0   4   0    1.16    0.50
   0  -4   0    1.41    0.75
   0   4   0    1.00    0.34
   0   4   0    1.92    0.60
   0  -4   0    0.95    0.48
   0   5   0   -0.12    0.28
   0   5   0   -0.06    0.27
   0  -5   0    0.28    0.61
   0   5   0   -0.31    0.40
   0   5   0   -0.24    0.52
   0   5   0   -0.02    0.31
   0   6   0   33.91    3.65
   0   6   0   31.80    2.72
   0  -6   0   30.18    3.57
   0   7   0   -0.28    0.41
   0  -7   0   -0.30    0.79
   0   7   0    0.10    0.83
   0   8   0    4.24    2.06
   0  -8   0    2.63    1.67
   0   9   0    0.35    1.31
   0  -9   0    0.33    1.41
   0 -10   0    4.56    2.75
   1   0   0   86.00    4.22
   1   0   0   83.47    4.81
   1   0   0   88.97    3.71
   1   0   0   86.06    4.35
  -1   0   0   83.92    4.22
  -1   0   0   85.24    4.35
  -1   0   0   91.09    3.71
  -1   0   0   86.79    4.50
  -1   0   0   83.51    4.93
   1  -1   0    5.49    0.86
   1   1   0    6.60    0.54
   1   1   0    5.95    0.92
   1  -1   0    5.69    0.43
   1   1   0    6.74    0.67
   1  -1   0    6.68    0.55
  -1   1   0    6.50    0.62
  -1  -1   0    6.16    0.64
  -1  -1   0    6.18    0.42
  -1  -1   0    6.58    0.66
  -1   1   0    6.67    0.81
  -1   1   0    6.26    0.53
  -1  -1   0    5.99    0.53
  -1   1   0    6.40    0.68
  -1   1   0    6.74    0.45
   1   2   0   47.66    2.67
   1   2   0   49.28    3.29
   1  -2   0   47.15    2.69
   1  -2   0   49.84    3.29
   1   2   0   47.62    2.82
  -1   2   0   46.43    3.04
  -1   2   0   46.38    3.22
  -1   2   0   49.21    2.71
  -1  -2   0   46.79    2.28
  -1   2   0   49.07    2.30
  -1  -2   0   48.76    2.80
  -1  -2   0   45.96    2.35
  -1  -2   0   47.18    2.99
  -1   2   0   45.96    2.75
   1  -3   0    5.22    0.75
   1   3   0    6.14    1.26
   1  -3   0    4.59    1.11
   1   3   0    5.39    0.79
  -1  -3   0    4.84    1.03
  -1   3   0    5.38    1.11
  -1   3   0    4.12    0.74
  -1  -3   0    4.77    0.51
  -1   3   0    5.60    0.57
  -1   3   0    5.53    1.07
  -1  -3   0    5.10    0.80
   1  -4   0   12.53    1.81
   1   4   0   12.51    1.25
   1   4   0   10.73    1.61
   1   4   0   11.91    1.33
  -1   4   0   11.46    1.24
  -1   4   0   11.77    1.26
  -1   4   0   12.18    1.60
  -1   4   0   13.23    1.74
  -1  -4   0   11.03    0.85
  -1   4   0   11.57    0.96
  -1  -4   0   11.22    1.22
  -1  -4   0   12.37    1.62
   1   5   0   28.91    2.26
   1  -5   0   27.89    3.10
   1   5   0   25.65    2.70
  -1   5   0   26.00    2.23
  -1  -5   0   27.78    2.21
  -1   5   0   29.09    3.02
  -1   5   0   24.20    2.62
  -1   5   0   25.87    1.78
  -1  -5   0   29.72    2.94
   1   6   0   40.70    3.18
   1  -6   0   44.17    4.48
  -1   6   0   43.22    3.33
  -1   6   0   45.63    3.40
  -1   6   0   42.05    4.23
  -1  -6   0   40.71    4.06
  -1  -6   0   38.18    3.03
   1   7   0   -0.22    0.46
   1  -7   0   -0.27    0.93
   1   7   0    0.60    0.98
  -1  -7   0   -0.05    0.91
  -1   7   0   -0.10    0.93
  -1   7   0    0.02    0.49
   1  -8   0    3.59    1.97
   1   8   0    5.16    2.23
  -1   8   0    4.97    2.05
  -1  -8   0    5.97    2.31
   1   9   0    1.90    1.77
   1  -9   0    3.24    2.11
  -1  -9   0    3.38    1.99
  -1   9   0    1.48    1.73
   1 -10   0    0.33    1.89
  -1 -10   0    1.35    1.71
   2   0   0   47.27    3.39
   2   0   0   47.03    2.47
   2   0   0   47.42    2.34
  -2   0   0   42.79    3.22
  -2   0   0   45.86    2.76
  -2   0   0   47.67    2.72
   2   1   0  951.30   38.85
   2   1   0  964.65   45.41
   2   1   0  936.94   48.18
   2  -1   0  915.24   39.01
   2  -1   0  968.26   45.79
   2  -1   0  954.67   48.24
   2   1   0  968.16   45.69
   2  -1   0  908.10   48.16
  -2  -1   0 1000.00   47.59
  -2  -1   0  968.83   37.13
  -2   1   0  906.48   45.62
  -2  -1   0  960.82   45.64
  -2   1   0  927.97   45.39
  -2   1   0  956.35   50.49
  -2   1   0  948.35   47.58
   2  -2   0   28.94    2.64
   2   2   0   27.77    1.79
   2  -2   0   28.40    1.82
   2   2   0   28.33    2.56
   2   2   0   28.58    2.03
   2  -2   0   26.99    1.52
  -2   2   0   29.42    2.42
  -2   2   0   28.34    1.53
  -2  -2   0   30.55    1.53
  -2   2   0   29.06    1.81
  -2   2   0   30.09    2.01
  -2  -2   0   29.52    2.01
  -2   2   0   29.23    2.17
  -2  -2   0   30.44    1.72
  -2  -2   0   30.44    2.18
   2   3   0    3.46    1.05
   2   3   0    2.55    0.56
   2   3   0    2.87    0.70
   2  -3   0    2.52    0.59
   2  -3   0    1.93    0.88
  -2   3   0    3.00    0.60
  -2  -3   0    2.39    0.39
  -2  -3   0    2.21    0.59
  -2   3   0    2.13    0.41
  -2   3   0    2.28    0.75
  -2   3   0    2.38    0.83
  -2  -3   0    2.83    0.80
   2   4   0   17.10    2.19
   2  -4   0   19.26    2.51
   2   4   0   21.01    1.92
   2   4   0   21.31    1.76
  -2  -4   0   22.53    1.72
  -2   4   0   21.24    1.90
  -2  -4   0   20.61    2.15
  -2  -4   0   21.98    1.29
  -2   4   0   22.21    2.41
  -2   4   0   20.80    2.16
  -2   4   0   22.86    1.47
   2  -5   0    0.34    0.82
   2   5   0    0.98    0.52
   2   5   0    1.02    0.85
  -2  -5   0    1.86    0.92
  -2   5   0    0.52    0.32
  -2   5   0    1.01    0.77
  -2   5   0    1.38    0.66
  -2   5   0    1.32    0.93
  -2  -5   0    0.67    0.57
   2  -6   0    1.34    1.12
   2   6   0    0.67    0.57
  -2   6   0    1.03    0.67
  -2   6   0    1.55    1.16
  -2  -6   0    0.43    0.56
  -2  -6   0    1.17    0.97
   2  -7   0   23.26    4.41
   2   7   0   25.51    2.56
  -2  -7   0   22.63    2.49
  -2   7   0   26.32    2.70
  -2   7   0   22.43    2.54
  -2   7   0   23.53    3.45
  -2  -7   0   28.19    3.56
   2   8   0    0.50    1.18
   2  -8   0    0.32    1.28
  -2  -8   0    0.42    1.07
  -2   8   0    0.40    1.22
   2   9   0    1.34    1.66
   2  -9   0    1.35    1.77
  -2  -9   0    1.22    1.59
   2 -10   0    1.57    2.05
  -2 -10   0    2.53    2.14
   3   0   0   82.74    5.76
   3   0   0   83.17    4.43
   3   0   0   88.03    4.15
  -3   0   0   81.47    5.69
  -3   0   0   83.84    4.76
  -3   0   0   90.02    4.95
   3  -1   0    5.65    1.41
   3   1   0    4.69    1.33
   3  -1   0    4.84    0.82
   3   1   0    6.07    0.88
   3  -1   0    5.64    0.61
   3   1   0    5.64    0.71
   3   1   0    5.59    0.62
  -3   1   0    4.30    0.84
  -3  -1   0    5.36    0.82
  -3  -1   0    5.36    0.82
  -3   1   0    5.84    0.86
  -3  -1   0    5.18    0.74
  -3   1   0    6.49    1.34
   3  -2   0  113.55    7.69
   3   2   0  128.93    6.64
   3   2   0  124.51    7.67
   3  -2   0  122.99    5.36
   3  -2   0  118.51    6.19
   3  -2   0  119.54    5.84
   3   2   0  117.38    6.17
   3   2   0  119.27    5.57
  -3   2   0  120.64    6.82
  -3   2   0  116.95    6.48
  -3  -2   0  109.88    6.73
  -3   2   0  117.98    7.49
  -3  -2   0  111.95    6.41
  -3  -2   0  115.55    5.31
   3  -3   0   51.36    2.68
   3   3   0   53.58    3.18
   3  -3   0   53.85    4.59
   3   3   0   54.97    3.08
   3  -3   0   52.16    3.22
   3   3   0   51.62    3.49
   3   3   0   53.65    4.25
  -3   3   0   52.64    3.76
  -3  -3   0   53.57    2.94
  -3  -3   0   51.64    3.72
  -3  -3   0   53.13    2.64
  -3   3   0   52.58    4.13
   3   4   0   10.49    2.08
   3   4   0   12.31    1.26
   3   4   0   11.98    1.50
   3  -4   0   12.26    2.54
  -3   4   0   11.45    0.98
  -3   4   0   10.23    2.05
  -3  -4   0   10.96    1.22
  -3  -4   0   11.83    0.86
  -3   4   0    9.97    1.57
  -3   4   0   10.51    1.37
  -3  -4   0   10.06    1.53
   3  -5   0   -0.17    0.83
   3   5   0    0.19    0.36
   3   5   0   -0.06    0.63
  -3   5   0   -0.06    0.52
  -3  -5   0    0.14    0.46
  -3   5   0    0.19    0.49
  -3   5   0    0.58    0.66
  -3  -5   0   -0.01    0.51
  -3  -5   0    0.01    0.17
   3   6   0    0.35    0.47
   3  -6   0    0.27    1.14
  -3   6   0    0.32    0.89
  -3  -6   0    0.09    0.73
  -3  -6   0   -0.05    0.53
  -3   6   0    0.15    0.50
   3  -7   0   67.67    7.06
   3   7   0   72.84    4.96
  -3   7   0   73.25    6.48
  -3  -7   0   66.56    6.06
  -3  -7   0   71.66    4.70
   3  -8   0    0.59    1.47
  -3  -8   0    0.35    1.13
  -3   8   0    1.02    1.43
  -3  -8   0    1.31    0.98
   3   9   0    2.43    1.91
   3  -9   0    1.87    2.07
   3   9   0    3.60    1.71
  -3  -9   0    1.65    1.61
   3 -10   0    0.28    2.11
  -3 -10   0    0.58    1.68
   4   0   0   13.69    1.10
   4   0   0   11.67    2.21
   4   0   0   13.80    1.26
  -4   0   0   14.29    1.20
  -4   0   0   11.87    1.35
  -4   0   0   13.37    1.37
  -4   0   0   12.73    1.94
   4   1   0  134.54    6.10
   4  -1   0  129.24    6.25
   4   1   0  134.28    8.53
   4   1   0  128.13    6.66
   4  -1   0  128.80    6.68
   4  -1   0  122.05    8.40
  -4  -1   0  128.29    5.80
  -4   1   0  134.53    8.47
  -4  -1   0  127.04    7.07
  -4   1   0  134.55    7.39
  -4   1   0  119.80    7.05
  -4  -1   0  126.91    7.36
   4  -2   0  174.84    9.02
   4   2   0  187.16    8.12
   4  -2   0  176.04    7.83
   4   2   0  174.87   10.91
   4  -2   0  182.08   11.10
   4  -2   0  176.96    8.38
  -4  -2   0  171.76    9.78
  -4   2   0  172.87   10.89
  -4  -2   0  178.34    7.76
  -4  -2   0  177.33    9.39
  -4   2   0  172.85    9.85
  -4   2   0  169.81    9.41
   4  -3   0   49.70    3.05
   4   3   0   47.53    3.50
   4   3   0   43.58    4.21
   4   3   0   46.57    2.98
   4   3   0   47.09    2.90
   4  -3   0   47.46    4.63
   4  -3   0   48.50    2.54
  -4  -3   0   44.99    2.44
  -4   3   0   50.22    4.20
  -4  -3   0   45.18    2.77
  -4   3   0   51.67    3.62
  -4  -3   0   47.32    3.56
   4  -4   0    7.58    0.84
   4   4   0    8.02    1.07
   4   4   0    7.35    1.94
   4   4   0    7.86    1.37
   4  -4   0    8.66    2.41
  -4   4   0    7.83    1.44
  -4  -4   0    8.18    0.72
  -4  -4   0    8.02    1.30
  -4   4   0    6.80    1.76
  -4   4   0    6.99    1.54
  -4  -4   0    7.51    1.58
   4  -5   0    1.06    1.23
   4   5   0    0.83    0.56
   4   5   0    1.50    0.78
  -4   5   0    0.70    0.66
  -4   5   0    0.63    0.76
  -4   5   0    0.82    0.97
  -4  -5   0    1.37    0.30
  -4  -5   0    0.20    0.67
  -4  -5   0    0.14    0.42
   4   6   0    1.72    0.89
   4  -6   0    1.77    1.55
   4   6   0    1.15    0.66
  -4   6   0    1.16    0.73
  -4  -6   0    0.71    0.90
  -4  -6   0    1.09    0.75
  -4   6   0    0.39    1.03
   4  -7   0   -0.10    1.27
   4   7   0    1.88    1.14
  -4   7   0    0.54    1.18
  -4  -7   0    1.28    1.21
  -4  -7   0    1.52    0.98
   4  -8   0    1.00    1.99
   4   8   0    0.10    1.04
  -4   8   0    2.17    1.78
  -4  -8   0    0.74    1.31
  -4  -8   0    0.91    1.06
   4  -9   0   -1.23    1.65
   4   9   0    0.67    1.25
   4   9   0    0.44    1.52
  -4  -9   0   -0.76    0.92
   4 -10   0    0.35    2.21
  -4 -10   0    0.57    1.73
   5   0   0   17.97    3.19
   5   0   0   15.60    1.35
   5   0   0   17.85    1.60
  -5   0   0   15.76    2.41
  -5   0   0   16.03    1.68
  -5   0   0   17.54    1.51
  -5   0   0   19.84    1.86
   5  -1   0    0.03    0.80
   5  -1   0    0.03    0.23
   5   1   0    0.36    0.41
   5  -1   0    0.24    0.46
   5   1   0   -0.03    0.76
   5   1   0    0.31    0.29
  -5   1   0    0.10    0.36
  -5   1   0    0.14    0.37
  -5  -1   0   -0.14    0.34
  -5  -1   0    0.10    0.36
  -5  -1   0    0.37    0.45
  -5   1   0    0.13    0.65
  -5   1   0    0.17    0.12
   5  -2   0    6.52    0.84
   5   2   0    6.70    1.10
   5   2   0    4.56    1.57
   5  -2   0    5.97    1.18
   5  -2   0    6.27    0.68
   5   2   0    6.37    0.86
   5  -2   0    7.58    2.16
  -5  -2   0    5.88    1.15
  -5  -2   0    6.00    1.01
  -5   2   0    6.39    1.21
  -5  -2   0    7.22    1.38
  -5   2   0    7.51    1.43
  -5   2   0    7.84    1.96
   5   3   0   97.84    5.29
   5  -3   0   97.39    7.97
   5   3   0  107.61    5.76
   5  -3   0   96.92    7.81
   5  -3   0  105.98    5.77
   5   3   0  104.32    7.67
   5  -3   0  100.14    4.85
  -5  -3   0   97.84    5.05
  -5  -3   0   97.34    4.78
  -5   3   0  104.80    6.52
  -5   3   0  105.54    7.51
  -5  -3   0   94.59    6.42
   5   4   0    2.16    1.32
   5  -4   0    2.48    0.55
   5  -4   0    1.67    1.52
   5   4   0    2.15    0.66
   5   4   0    2.08    0.78
   5  -4   0    1.78    1.60
  -5   4   0    1.88    0.85
  -5  -4   0    2.14    0.43
  -5  -4   0    2.31    0.82
  -5   4   0    1.81    0.88
  -5   4   0    1.94    1.21
  -5  -4   0    1.79    0.96
   5   5   0   -0.16    0.53
   5  -5   0    1.14    1.26
   5   5   0    0.79    0.51
  -5  -5   0    0.19    0.72
  -5   5   0    0.22    0.83
  -5   5   0   -0.02    0.55
  -5   5   0    0.08    0.65
  -5  -5   0    0.06    0.53
   5  -6   0    8.14    3.11
   5   6   0   10.50    1.97
   5   6   0   10.71    1.57
  -5   6   0    9.73    2.61
  -5  -6   0   11.63    1.90
  -5  -6   0    9.47    2.28
   5  -7   0    2.14    1.99
   5   7   0    2.85    1.29
  -5  -7   0    3.11    1.66
  -5  -7   0    4.83    1.43
  -5   7   0    4.59    2.16
   5   8   0    3.98    1.69
   5  -8   0    2.61    2.41
  -5  -8   0    4.61    1.63
  -5  -8   0    4.19    1.91
   5   9   0    0.72    1.32
   5  -9   0   -0.02    1.86
  -5  -9   0   -0.68    0.90
  -5  -9   0   -0.38    1.29
   6   0   0   96.23    5.26
   6   0   0   99.36    5.44
   6   0   0   96.55    7.71
  -6   0   0  100.92    5.99
  -6   0   0   91.99    7.53
  -6   0   0   97.16    6.18
  -6   0   0   93.51    4.98
   6   1   0    0.77    1.03
   6  -1   0    0.09    0.26
   6   1   0   -0.09    0.20
   6   1   0    0.36    0.42
   6  -1   0    1.09    1.13
   6  -1   0   -0.16    0.40
  -6   1   0    0.20    0.50
  -6   1   0   -0.31    0.35
  -6  -1   0    0.01    0.38
  -6   1   0    0.55    0.91
  -6  -1   0    0.14    0.46
  -6  -1   0    0.22    0.41
   6   2   0   -0.11    0.89
   6   2   0    0.43    0.48
   6  -2   0    0.32    0.95
   6   2   0    0.00    0.30
   6  -2   0    0.08    0.29
   6  -2   0    0.61    0.59
  -6   2   0    0.05    0.46
  -6   2   0   -0.02    0.71
  -6  -2   0   -0.18    0.41
  -6  -2   0    0.11    0.49
  -6   2   0    0.17    0.45
   6   3   0   74.05    6.58
   6  -3   0   79.75    3.99
   6   3   0   74.78    4.64
   6   3   0   74.80    4.49
   6  -3   0   77.46    7.11
  -6   3   0   72.90    5.39
  -6  -3   0   80.82    4.33
  -6  -3   0   79.43    3.88
  -6   3   0   81.38    6.62
  -6  -3   0   81.72    5.58
   6   4   0   38.73    2.99
   6  -4   0   37.15    2.37
   6  -4   0   41.20    5.11
   6   4   0   41.12    2.99
   6   4   0   38.14    4.42
  -6  -4   0   39.54    2.86
  -6  -4   0   42.12    3.82
  -6   4   0   42.57    3.71
  -6   4   0   42.91    3.49
  -6   4   0   38.45    4.35
  -6  -4   0   38.05    2.16
   6   5   0    7.48    1.41
   6   5   0    8.96    1.68
   6  -5   0    6.92    2.79
   6  -5   0    5.84    2.68
   6  -5   0    7.27    0.97
  -6  -5   0    8.55    1.55
  -6  -5   0    7.77    1.91
  -6   5   0    6.44    2.17
  -6   5   0    7.20    1.85
   6  -6   0    5.35    2.63
   6  -6   0    4.48    2.70
   6   6   0    4.82    1.42
  -6  -6   0    4.38    1.69
  -6   6   0    5.34    2.20
  -6  -6   0    4.95    1.35
   6  -7   0    4.38    2.76
   6   7   0    5.05    1.62
   6  -7   0    8.60    3.61
  -6   7   0    5.72    2.42
  -6  -7   0    4.78    1.51
  -6  -7   0    4.19    1.88
   6   8   0    0.44    1.10
   6  -8   0    1.57    2.12
   6  -8   0   -0.91    1.93
  -6  -8   0    0.38    0.98
  -6  -8   0   -0.06    1.13
   6  -9   0   -0.56    2.30
   6  -9   0    0.75    2.40
  -6  -9   0    2.77    1.60
  -6  -9   0    0.55    1.47
   7   0   0    1.19    0.53
   7   0   0    1.92    1.49
   7   0   0    1.59    0.79
  -7   0   0    0.78    1.17
  -7   0   0    2.00    0.92
  -7   0   0    1.11    0.71
   7   1   0    2.45    0.90
   7   1   0    1.77    1.49
   7  -1   0    2.06    1.52
   7   1   0    2.71    0.75
   7  -1   0    1.91    0.88
   7  -1   0    2.55    0.71
  -7   1   0    2.23    1.50
  -7  -1   0    2.44    0.99
  -7  -1   0    2.29    0.83
  -7   1   0    2.61    0.98
   7   2   0    5.88    1.08
   7   2   0    5.43    1.18
   7  -2   0    6.72    1.46
   7   2   0    4.13    1.94
   7  -2   0    6.68    2.54
  -7  -2   0    5.06    1.39
  -7   2   0    5.73    2.07
  -7   2   0    4.11    1.27
  -7  -2   0    4.84    1.10
   7   3   0    6.58    1.15
   7   3   0    6.14    2.33
   7  -3   0    7.70    0.93
   7   3   0    5.26    1.25
   7  -3   0    8.64    2.86
  -7  -3   0    5.05    1.20
  -7  -3   0    7.37    0.81
  -7  -3   0    7.61    1.83
  -7   3   0    7.76    2.44
  -7   3   0    7.14    1.65
   7   4   0   27.81    2.56
   7   4   0   26.94    2.37
   7  -4   0   27.96    1.96
   7  -4   0   29.88    4.71
  -7   4   0   25.84    3.91
  -7  -4   0   27.34    1.65
  -7  -4   0   26.62    3.15
  -7   4   0   25.21    2.95
  -7  -4   0   30.88    2.54
   7  -5   0    2.53    0.71
   7  -5   0    4.64    2.56
   7   5   0    3.86    1.33
  -7   5   0    2.28    1.62
  -7  -5   0    2.68    1.35
  -7  -5   0    2.46    0.97
   7  -6   0    7.69    3.39
   7   6   0    7.70    1.86
  -7  -6   0    7.10    1.62
  -7   6   0    7.58    2.69
  -7  -6   0    7.60    2.29
   7  -7   0    1.01    1.92
   7   7   0    1.51    1.21
   7  -7   0   -0.54    1.70
  -7  -7   0    0.45    0.89
  -7  -7   0    0.62    1.24
  -7   7   0    0.52    1.54
   7  -8   0    0.97    2.53
   7  -8   0    1.97    2.68
  -7  -8   0    2.32    1.79
  -7  -8   0    1.87    1.40
   7  -9   0    2.76    3.12
   7  -9   0    4.54    3.55
  -7  -9   0    5.39    2.65
   8   0   0    8.85    1.66
   8   0   0    7.52    2.73
  -8   0   0    8.81    1.57
  -8   0   0    6.72    2.51
  -8   0   0    7.96    1.72
   8   1   0    3.11    1.99
   8   1   0    3.25    1.11
   8  -1   0    3.05    1.20
   8  -1   0    1.99    1.76
  -8  -1   0    3.47    1.05
  -8   1   0    3.07    1.81
  -8  -1   0    3.38    1.32
  -8   1   0    2.89    1.21
  -8   1   0    2.47    0.94
   8   2   0    8.60    2.81
   8  -2   0    9.55    3.11
   8   2   0    6.54    1.45
   8  -2   0    9.35    1.87
  -8   2   0    7.10    1.72
  -8  -2   0    7.19    1.40
  -8  -2   0    5.57    1.56
  -8   2   0    6.96    2.50
   8   3   0    4.36    1.20
   8  -3   0    1.50    1.95
  -8   3   0    5.03    2.22
  -8  -3   0    5.20    1.57
  -8   3   0    2.85    1.14
  -8  -3   0    3.77    1.12
  -8  -3   0    3.95    0.70
   8  -4   0   37.49    2.65
   8   4   0   35.01    3.09
   8  -4   0   37.55    5.65
  -8   4   0   33.56    3.61
  -8   4   0   36.49    4.96
  -8  -4   0   36.91    2.96
  -8  -4   0   34.72    3.77
   8   5   0    1.97    1.12
   8  -5   0    3.70    0.87
   8  -5   0    5.33    2.87
  -8   5   0    3.54    2.13
  -8  -5   0    4.27    1.68
  -8  -5   0    3.19    1.16
   8  -6   0    0.51    2.06
  -8  -6   0    0.17    0.96
  -8   6   0    1.16    1.76
  -8  -6   0   -0.03    0.79
   8  -7   0    0.82    2.17
  -8  -7   0    2.62    1.70
  -8  -7   0    1.57    1.19
   8  -8   0    2.58    3.00
  -8  -8   0    2.43    2.03
   9   0   0   17.83    2.25
   9   0   0   19.24    4.64
  -9   0   0   22.66    2.34
  -9   0   0   20.82    2.71
  -9   0   0   20.33    4.38
   9  -1   0    1.87    0.98
   9  -1   0   -0.05    1.63
   9   1   0    0.49    0.75
   9   1   0    1.65    1.97
  -9  -1   0    1.31    0.89
  -9   1   0    0.61    1.41
  -9  -1   0    1.50    1.06
  -9   1   0    1.16    0.89
  -9   1   0    1.08    0.82
   9  -2   0    1.18    0.96
   9  -2   0    1.64    1.95
   9   2   0    0.30    0.74
  -9  -2   0    0.40    0.75
  -9  -2   0   -0.17    0.69
  -9   2   0    1.72    1.61
  -9   2   0    1.09    1.08
   9   3   0    0.78    0.78
   9  -3   0    0.84    1.85
  -9  -3   0    1.90    0.98
  -9  -3   0    1.23    0.47
  -9   3   0    2.33    1.87
  -9   3   0    1.52    1.18
  -9  -3   0    1.31    1.11
   9  -4   0   27.47    6.32
   9   4   0   23.88    2.63
  -9   4   0   26.48    4.48
  -9  -4   0   26.26    3.35
  -9  -4   0   23.00    2.46
   9  -5   0   -0.57    1.87
  -9  -5   0    1.28    1.25
  -9  -5   0    0.15    0.87
  -9   5   0    0.06    1.64
   9  -6   0    4.62    3.07
  -9   6   0    6.76    3.04
  -9  -6   0    4.90    2.06
   9  -7   0    3.69    3.34
  -9  -7   0    5.37    2.32
   9  -8   0   11.39    5.32
  -9  -8   0   12.57    3.59
  10   0   0    4.59    1.46
  10   0   0    4.45    2.73
 -10   0   0    3.75    1.50
 -10   0   0    4.16    1.34
  10  -1   0    0.54    1.79
  10   1   0   -0.53    0.75
  10  -1   0    0.68    0.87
 -10  -1   0   -0.17    0.73
 -10  -1   0   -0.60    0.61
 -10   1   0    0.11    1.61
 -10   1   0   -0.05    0.78
 -10   1   0   -0.71    0.70
  10  -2   0    2.56    2.30
  10   2   0    0.20    0.89
  10  -2   0   -0.40    0.85
 -10  -2   0   -0.11    0.81
 -10  -2   0    0.28    0.81
 -10   2   0    0.02    0.89
 -10   2   0    0.20    0.83
 -10   2   0   -0.44    1.49
  10  -3   0    5.82    3.23
 -10   3   0    6.56    2.96
 -10  -3   0    6.47    1.98
 -10  -3   0    6.04    1.50
  10  -4   0    0.76    2.36
 -10  -4   0    0.96    1.14
 -10   4   0    1.12    1.92
 -10  -4   0    1.41    1.03
  10  -5   0    7.57    4.04
 -10   5   0    8.75    3.53
 -10  -5   0    9.72    2.75
  10  -6   0    2.37    3.40
 -10  -6   0    2.70    1.67
  10  -7   0    5.61    4.04
 -10  -7   0    2.90    2.07
  11   0   0    2.94    1.43
 -11   0   0    3.07    1.25
 -11   0   0    2.36    1.38
  11   1   0    5.77    1.83
  11  -1   0    6.69    1.95
 -11   1   0    6.73    1.89
 -11  -1   0    4.77    1.54
 -11  -1   0    7.66    2.24
 -11   1   0    5.95    3.34
 -11   1   0    5.23    1.95
  11  -2   0   -0.42    0.94
  11  -2   0   -0.96    1.89
 -11  -2   0    0.57    0.92
 -11   2   0   -0.12    1.83
 -11  -2   0    0.84    1.06
 -11   2   0   -0.32    0.94
 -11   2   0    0.73    1.12
  11  -3   0   10.72    4.35
 -11  -3   0   11.43    2.75
 -11  -3   0   12.12    2.14
 -11   3   0    8.87    3.60
 -11   3   0   12.49    2.61
  11  -4   0   -1.42    2.27
 -11  -4   0    0.16    1.18
 -11   4   0   -0.73    1.66
  11  -5   0   -0.70    2.50
 -11  -5   0   -0.14    1.05
 -11   5   0    1.76    2.49
  11  -6   0    1.01    3.31
 -11  -6   0    1.88    1.72
 -12   0   0    0.34    1.16
 -12   0   0    0.63    1.05
 -12   1   0    6.61    1.97
 -12  -1   0    5.69    1.73
 -12  -1   0    4.86    1.96
 -12   1   0    7.41    2.40
 -12   2   0    5.16    3.30
 -12   2   0    5.59    1.96
 -12  -2   0    2.86    1.55
 -12   3   0    2.90    2.79
 -12  -3   0    4.84    2.05
 -12   3   0    5.80    2.02
 -12  -4   0    0.23    1.43
 -12   4   0   -0.66    1.27
 -12   4   0    2.01    2.64
 -12  -5   0    0.14    1.23
 -13  -1   0    0.01    1.20
 -13   1   0    0.03    1.26
 -13  -2   0    0.00    1.21
 -13   2   0    0.87    1.36
 -13  -3   0    0.39    1.30
 -13   3   0    0.97    1.52
   0 -10   1    1.40    1.72
   0   9  -1    6.63    2.68
   0  -9   1    5.27    2.56
   0   8  -1    4.97    2.19
   0  -8   1    5.42    2.32
   0   7  -1    6.21    2.12
   0   7  -1    7.51    1.61
   0  -7   1    6.48    2.16
   0   6  -1   68.43    5.87
   0   6  -1   68.92    5.39
   0  -6   1   72.41    5.98
   0   6  -1   68.90    4.60
   0   5  -1    0.83    0.81
   0  -5   1    1.54    0.97
   0   5  -1    0.86    0.80
   0  -5   1    0.58    0.54
   0   5  -1    1.21    0.48
   0  -5   1    1.05    0.39
   0   5  -1    1.23    0.56
   0   4  -1    3.68    0.77
   0   4  -1    3.57    0.59
   0  -4   1    4.21    0.66
   0  -4   1    4.29    0.89
   0   4  -1    4.06    1.25
   0   4  -1    3.92    1.13
   0  -4   1    2.55    0.99
   0  -4   1    2.44    0.71
   0  -3   1   38.27    2.33
   0   3  -1   39.88    2.54
   0  -3   1   39.08    2.15
   0  -3   1   42.09    3.11
   0   3  -1   38.14    2.52
   0   3  -1   39.53    3.11
   0   3  -1   39.74    2.13
   0  -3   1   42.89    2.66
   0   2  -1   51.60    2.57
   0  -2   1   53.58    3.46
   0  -2   1   50.39    2.64
   0  -2   1   57.48    3.12
   0   2  -1   52.96    3.04
   0  -2   1   53.82    2.63
   0   2  -1   54.70    3.59
   0   2  -1   56.72    3.06
   0   2  -1   55.76    3.06
   0   1  -1    6.31    0.82
   0   1  -1    6.02    0.54
   0  -1   1    6.33    0.54
   0  -1   1    6.29    0.72
   0  -1   1    6.63    0.45
   0  -1   1    5.97    0.54
   0   1  -1    5.73    0.43
   0  -1   1    5.56    0.43
   0   0  -1   -0.31    0.07
   0   0   1   -0.40    0.05
   0   0  -1   -0.32    0.08
   0   0   1   -0.34    0.08
   0   0   1   -0.36    0.06
   0   0  -1   -0.35    0.06
   0  -1  -1    6.24    0.54
   0   1   1    5.80    0.42
   0   1   1    6.30    0.45
   0   1   1    6.52    0.54
   0  -1  -1    6.67    0.63
   0   2   1   55.49    2.99
   0  -2  -1   53.63    3.27
   0  -2  -1   55.71    2.64
   0   2   1   50.80    3.23
   0   2   1   55.70    2.96
   0  -3  -1   41.36    2.38
   0  -3  -1   41.28    2.99
   0   3   1   42.11    2.60
   0   3   1   40.01    2.54
   0   3   1   43.95    2.96
   0  -4  -1    4.10    1.09
   0   4   1    3.29    0.73
   0   4   1    3.24    0.74
   0   4   1    4.30    1.03
   0   5   1    1.28    0.49
   0   5   1    1.02    0.70
   0   5   1    0.87    0.49
   0   5   1    1.16    0.58
   0   5   1    1.50    0.87
   0  -5  -1    1.57    0.92
   0   6   1   63.90    5.66
   0   6   1   73.01    4.81
   0  -6  -1   75.79    6.01
   0   6   1   79.39    4.90
   0   7   1    7.14    1.49
   0  -7  -1    6.64    2.22
   0   7   1    5.37    1.87
   0   8   1    6.21    1.74
   0  -8  -1    4.83    2.05
   0   8   1    5.32    1.98
   0  -9  -1    5.12    2.48
   0 -10  -1    0.74    1.57
   1 -10   1    0.79    1.87
   1  10  -1   -0.47    1.54
  -1 -10   1   -0.09    1.39
   1   9  -1    2.20    1.83
   1  -9   1    1.17    1.77
  -1   9  -1    1.22    1.78
  -1  -9   1    0.55    1.23
  -1  -8   1   25.69    4.07
   1   7  -1    3.32    1.09
   1   7  -1    3.99    1.71
  -1  -7   1    3.33    1.27
  -1  -7   1    3.63    1.68
  -1   7  -1    0.68    1.02
   1  -4   1    3.66    0.66
   1  -4   1    5.33    1.48
   1  -4   1    4.65    0.92
  -1   4  -1    3.62    0.83
  -1   4  -1    4.67    1.30
  -1   4  -1    4.74    1.25
  -1   4  -1    5.09    0.64
   1   0   1   -0.02    0.12
   1   0   1   -0.01    0.08
   1   0   1    0.04    0.08
   1   0  -1    0.04    0.08
   1   0   1   -0.01    0.11
   1   0  -1    0.00    0.05
   1   0  -1    0.19    0.29
   1   0   1    0.01    0.32
   1   0  -1   -0.01    0.08
   1   0  -1   -0.11    0.34
  -1   0  -1    0.04    0.12
  -1   0  -1   -0.09    0.13
  -1   0   1   -0.01    0.08
  -1   0  -1    0.16    0.29
  -1   0  -1    0.01    0.10
  -1   0   1    0.04    0.09
  -1   0  -1    0.06    0.10
  -1   0   1    0.02    0.16
  -1   0   1    0.19    0.17
  -1   0   1   -0.12    0.16
   1  -1  -1  286.02   13.51
   1  -1  -1  249.94   12.50
   1  -1  -1  261.77   13.90
   1  -1  -1  254.99   10.97
  -1   1   1  257.15   13.93
  -1   1   1  259.46   10.94
  -1   1   1  269.53   12.55
  -1   1   1  260.33   12.65
  -1   1   1  239.25   13.14
   1  -4  -1   15.81    2.02
  -1   4   1   16.68    1.18
  -1   4   1   16.74    1.49
  -1   4   1   16.17    1.54
  -1   4   1   16.04    1.75
  -1   4   1   15.64    1.86
   1  -7  -1    3.81    1.76
  -1   7   1    4.05    1.25
  -1   7   1    3.09    1.06
  -1   7   1    3.40    1.62
   1   9   1    4.71    2.32
   1  -9  -1    0.31    1.40
  -1  -9  -1    4.68    2.27
   1 -10  -1   -0.22    1.57
  -1 -10  -1    1.43    1.86
   2  10  -1    4.79    2.64
   2 -10   1    0.38    1.93
  -2 -10   1    6.93    2.99
   2  -9   1    3.69    2.51
   2   9  -1    0.67    1.59
  -2   9  -1    4.37    2.27
   2   8  -1   11.32    3.08
  -2  -8   1    9.76    2.89
   2  -6   1   26.53    3.62
  -2   6  -1   22.63    2.33
  -2   6  -1   24.88    3.25
  -2   6  -1   21.68    2.30
  -2   6  -1   25.76    2.96
   2  -5   1   53.67    4.88
  -2   5  -1   46.67    3.44
  -2   5  -1   53.04    4.27
  -2   5  -1   50.52    2.93
  -2   5  -1   49.89    4.48
   2   4  -1    9.54    1.97
   2   4  -1    7.11    1.01
  -2  -4   1    7.13    1.30
  -2  -4   1    7.79    0.78
  -2  -4   1    7.88    1.20
  -2   4  -1   10.37    1.18
  -2  -4   1    8.69    1.66
   2  -3   1    1.47    0.37
   2   3  -1    0.72    0.34
   2   3  -1    0.67    0.74
   2  -3   1    1.64    0.50
   2  -3   1    0.98    0.77
  -2   3  -1    1.57    0.72
  -2  -3   1    0.67    0.54
  -2   3  -1    1.36    0.49
  -2   3  -1    1.52    0.79
  -2  -3   1    0.83    0.30
  -2  -3   1    0.27    0.38
  -2  -3   1    0.63    0.42
  -2   3  -1    1.75    0.42
   2   0   1   -0.08    0.21
   2   0  -1   -0.18    0.55
   2   0   1    0.17    0.56
   2   0  -1    0.23    0.18
   2   0  -1    0.00    0.25
   2   0  -1   -0.09    0.08
   2   0   1    0.15    0.24
   2   0   1   -0.05    0.15
  -2   0   1   -0.06    0.13
  -2   0  -1    0.04    0.21
  -2   0   1    0.19    0.49
  -2   0  -1   -0.04    0.26
  -2   0  -1   -0.08    0.12
  -2   0   1    0.02    0.24
  -2   0   1   -0.22    0.26
  -2   0  -1   -0.02    0.47
  -2   0   1    0.19    0.29
   2   3   1    2.03    0.48
   2   3   1    1.24    0.51
   2  -3  -1    0.61    0.65
   2   3   1    1.47    0.69
  -2  -3  -1    2.07    0.51
  -2   3   1    1.03    0.62
  -2   3   1    0.74    0.34
  -2   3   1    0.71    0.26
  -2   3   1    1.14    0.55
  -2   3   1    0.61    0.40
  -2  -3  -1    1.33    0.57
   2  -4  -1    8.66    1.91
  -2   4   1    7.66    1.23
  -2   4   1    8.48    0.81
  -2   4   1    8.69    1.45
  -2   4   1    8.10    1.13
  -2   4   1    8.13    1.03
   2  -7  -1   18.32    3.74
  -2   7   1   17.67    3.34
   2  -8  -1    7.78    2.84
   2   8   1    4.23    1.98
  -2  -8  -1    3.54    1.77
  -2   8   1   11.11    2.88
   2   9   1    3.97    2.09
   2  -9  -1    0.69    1.60
  -2  -9  -1    2.35    1.82
   2 -10  -1    5.17    2.96
  -2 -10  -1    0.62    1.46
   3 -10   1    0.88    2.31
  -3 -10   1   -0.58    1.58
   3   9  -1    6.44    2.07
   3   9  -1    5.98    2.65
   3  -9   1   10.22    3.77
  -3  -9   1    6.95    2.81
  -3   9  -1    8.31    3.09
   3  -8   1    6.85    2.92
  -3   8  -1    9.06    2.86
   3  -7   1    5.10    2.40
  -3  -7   1    0.12    0.78
  -3  -7   1    0.27    0.96
  -3   7  -1    4.82    2.01
   3   6  -1    5.78    1.25
   3  -6   1    2.47    1.69
  -3  -6   1    4.54    1.60
  -3   6  -1    1.60    0.75
  -3  -6   1    4.61    1.20
  -3   6  -1    2.49    1.21
  -3   6  -1    1.38    1.14
   3  -5   1   21.20    3.12
   3   5  -1   14.76    2.74
   3   5  -1   14.48    1.61
  -3   5  -1   18.69    2.31
  -3  -5   1   14.97    2.17
  -3   5  -1   18.19    1.89
  -3  -5   1   14.93    1.65
  -3   5  -1   20.07    2.70
  -3  -5   1   14.99    1.20
   3  -3   1    0.14    0.27
   3   3  -1    0.50    0.45
   3  -3   1    1.06    0.37
   3   3  -1    0.64    0.74
   3  -3   1    1.00    0.90
   3   3  -1    0.03    0.16
  -3   3  -1    0.67    0.42
  -3   3  -1    0.81    0.58
  -3   3  -1    0.69    0.68
  -3  -3   1    0.53    0.50
  -3  -3   1    0.60    0.43
  -3  -3   1    0.19    0.44
  -3  -3   1    0.47    0.25
   3   1  -1   46.60    2.73
   3   1  -1   47.49    3.94
   3   1  -1   49.51    2.67
  -3  -1   1   52.89    3.19
  -3  -1   1   46.54    2.55
  -3  -1   1   47.97    3.08
   3   0   1   -0.09    0.28
   3   0  -1    0.04    0.70
   3   0  -1   -0.34    0.28
   3   0  -1    0.07    0.18
   3   0   1   -0.10    0.16
   3   0   1    0.43    0.67
   3   0   1   -0.04    0.26
  -3   0   1   -0.12    0.30
  -3   0  -1   -0.04    0.29
  -3   0  -1    0.07    0.12
  -3   0  -1   -0.03    0.26
  -3   0   1   -0.07    0.29
  -3   0  -1    0.09    0.54
  -3   0   1   -0.27    0.51
  -3   0   1   -0.04    0.28
   3   1   1  110.62    4.81
   3   1   1  106.75    5.41
   3   1   1  103.00    5.73
   3   1   1  104.08    6.67
  -3  -1  -1  101.08    5.58
  -3  -1  -1  103.87    4.59
  -3  -1  -1  109.27    5.93
  -3  -1  -1   99.14    7.06
   3   3   1    0.75    0.36
   3  -3  -1    0.57    0.25
   3   3   1    0.55    0.45
   3   3   1    0.63    0.42
   3  -3  -1    1.01    0.85
   3   3   1    1.06    0.79
  -3   3   1    0.78    0.35
  -3  -3  -1    0.68    0.37
  -3   3   1    1.00    0.54
  -3   3   1    0.64    0.61
  -3  -3  -1    0.48    0.46
  -3  -3  -1    0.83    0.18
  -3   3   1    0.51    0.42
  -3   3   1    0.47    0.26
   3   5   1   19.83    1.81
   3  -5  -1   15.96    3.18
  -3  -5  -1   17.99    2.23
  -3  -5  -1   20.45    1.81
  -3   5   1   17.64    1.95
  -3   5   1   14.95    2.02
  -3   5   1   14.93    2.27
   3  -6  -1    5.30    2.16
  -3   6   1    6.77    1.97
  -3   6   1    5.95    1.40
   3   7   1    5.97    1.37
   3  -7  -1    0.09    1.08
  -3  -7  -1    5.19    1.37
  -3   7   1    0.73    1.17
  -3  -7  -1    6.16    2.02
   3  -8  -1    3.70    2.20
  -3  -8  -1    8.85    2.60
   3   9   1    6.93    2.14
   3   9   1    8.93    2.94
   3  -9  -1    5.42    2.91
  -3  -9  -1    6.80    2.56
   3 -10  -1   -0.03    2.02
  -3 -10  -1   -0.27    1.53
   4 -10   1    0.95    2.29
  -4 -10   1    4.06    2.32
   4   9  -1   12.22    3.49
   4   9  -1   12.37    2.74
  -4  -9   1   12.22    2.57
  -4  -9   1   10.04    3.07
   4   8  -1   24.40    3.10
  -4  -8   1   31.66    4.31
  -4  -8   1   29.72    3.21
   4  -7   1    6.95    2.91
   4   7  -1    2.18    1.14
  -4   7  -1    7.65    2.50
  -4  -7   1    2.87    1.24
  -4  -7   1    2.11    1.35
   4   6  -1    0.75    0.60
   4  -6   1    0.77    1.25
   4   6  -1    0.77    0.81
  -4  -6   1    0.18    0.61
  -4   6  -1    1.38    1.26
  -4  -6   1    0.66    0.92
  -4  -6   1    0.54    0.31
   4  -5   1   55.88    5.81
   4   5  -1   53.83    3.75
   4   5  -1   52.48    5.07
   4   5  -1   56.91    3.86
  -4   5  -1   62.89    4.86
  -4   5  -1   60.20    4.18
  -4  -5   1   55.77    4.60
  -4  -5   1   53.71    2.96
  -4   5  -1   58.30    5.27
  -4  -5   1   51.17    3.51
   4   4  -1    0.80    1.00
   4   4  -1    1.60    0.78
   4  -4   1    7.82    2.30
   4   4  -1    1.89    0.64
  -4  -4   1    2.08    0.48
  -4   4  -1    7.16    1.83
  -4  -4   1    2.78    0.83
  -4  -4   1    2.08    0.90
   4   3  -1   37.18    2.69
   4   3  -1   45.19    2.83
   4   3  -1   45.93    4.30
  -4  -3   1   46.21    3.49
  -4  -3   1   42.77    3.17
  -4  -3   1   42.68    2.68
  -4  -3   1   43.23    2.35
   4  -2   1  141.79    9.24
   4  -2   1  139.69    6.36
   4  -2   1  137.75    7.36
  -4   2  -1  154.19    9.37
  -4   2  -1  151.50    7.80
  -4   2  -1  124.83    8.05
   4   0  -1    0.12    0.42
   4   0  -1    0.04    0.22
   4   0   1   -0.07    0.19
   4   0  -1    0.17    0.78
   4   0   1   -0.35    0.26
   4   0   1   -0.02    0.78
  -4   0   1   -0.23    0.57
  -4   0  -1   -0.07    0.34
  -4   0  -1   -0.06    0.09
  -4   0   1   -0.23    0.34
  -4   0  -1   -0.51    0.48
  -4   0   1   -0.19    0.35
  -4   0   1   -0.11    0.28
  -4   0  -1   -0.26    0.27
   4   4   1    7.97    1.89
   4   4   1    8.22    1.07
   4   4   1    9.30    1.41
  -4  -4  -1    7.78    1.21
  -4  -4  -1    7.33    1.52
   4   5   1   58.35    3.72
   4   5   1   55.13    3.63
   4  -5  -1   54.95    5.64
  -4   5   1   51.27    4.19
  -4   5   1   54.09    4.02
  -4  -5  -1   53.77    3.36
  -4  -5  -1   59.29    4.52
  -4   5   1   45.19    4.55
   4   6   1    0.59    0.56
   4  -6  -1    2.20    1.59
   4   6   1    0.94    0.74
  -4   6   1    1.34    0.86
  -4  -6  -1    0.89    0.68
  -4  -6  -1    0.38    0.89
  -4   6   1    0.55    1.01
   4   7   1    6.28    1.64
   4  -7  -1    2.33    1.87
   4   7   1    5.02    1.26
  -4  -7  -1    5.43    1.44
  -4   7   1    2.49    1.66
  -4  -7  -1    4.53    1.78
   4   8   1    6.40    1.83
  -4  -8  -1    3.80    1.48
  -4  -8  -1    5.05    2.08
   4  -9  -1   13.23    4.33
   4 -10  -1    2.34    2.81
  -4 -10  -1    0.14    1.57
   5   9  -1    9.00    2.35
   5  -9   1    9.62    4.20
  -5  -9   1   10.49    3.28
  -5  -9   1   12.94    2.68
   5  -8   1   18.63    5.24
   5  -7   1   -0.14    1.60
   5   7  -1    0.48    0.86
  -5  -7   1   -0.07    0.75
  -5   7  -1    1.19    1.52
  -5  -7   1    0.08    0.98
   5   6  -1    3.04    1.26
   5  -6   1   14.40    3.89
  -5  -6   1    3.83    1.18
  -5  -6   1    1.30    1.12
   5   5  -1   14.66    1.67
   5   5  -1   16.42    2.00
   5   5  -1   16.53    3.33
  -5  -5   1   15.92    2.34
  -5  -5   1   16.24    1.85
  -5  -5   1   15.23    1.19
   5  -4   1   12.91    3.24
   5  -4   1   15.97    3.56
   5   2  -1   13.98    2.79
   5   2  -1   10.82    1.31
   5  -2   1   19.48    2.83
   5   2  -1   11.54    1.17
  -5  -2   1   12.30    1.57
  -5  -2   1   10.68    1.28
  -5  -2   1   12.03    1.52
   5   0  -1   -0.40    0.74
   5   0   1    0.00    0.35
   5   0  -1    0.15    0.25
   5   0  -1    0.14    0.42
   5   0   1   -0.62    0.64
   5   0   1    0.03    0.20
  -5   0   1    0.10    0.37
  -5   0   1    0.25    0.43
  -5   0   1   -0.06    0.33
  -5   0  -1   -0.19    0.63
  -5   0   1    0.26    0.75
  -5   0  -1   -0.21    0.31
  -5   0  -1    0.23    0.38
  -5   0  -1   -0.21    0.30
   5  -2  -1   12.20    2.67
   5  -2  -1   12.66    0.99
   5  -2  -1   13.26    1.20
   5  -2  -1   13.63    1.60
  -5   2   1   12.53    1.54
  -5   2   1   13.12    2.14
   5   4   1   15.35    2.87
   5  -5  -1   16.01    3.77
  -5   5   1   15.29    2.57
   5   6   1   15.89    2.39
   5   6   1   16.17    1.87
  -5  -6  -1   15.48    1.89
  -5  -6  -1   14.58    2.77
   5  -7  -1   -0.19    1.43
   5   7   1    0.55    0.98
  -5  -7  -1   -0.36    0.85
  -5  -7  -1    0.67    0.90
  -5   7   1   -0.41    1.10
   5   8   1   22.82    2.99
  -5  -8  -1   20.14    3.95
  -5  -8  -1   24.02    2.76
   5  -9  -1   11.28    4.33
  -5  -9  -1    7.66    2.82
  -6  -9   1   29.36    4.00
   6  -8   1    0.48    2.19
   6   8  -1    5.54    1.83
   6  -8   1    0.50    1.81
  -6  -8   1    6.53    1.87
  -6  -8   1    4.51    2.05
   6  -7   1    1.68    2.19
   6  -7   1    1.41    2.13
   6   7  -1    1.31    1.01
  -6  -7   1   -0.43    0.97
  -6   7  -1    1.77    1.77
  -6  -7   1    0.42    0.86
   6  -6   1   14.24    4.07
   6   6  -1    4.90    1.48
   6  -6   1    9.83    3.46
  -6   6  -1   10.12    2.92
  -6  -6   1    5.27    1.87
  -6  -6   1    4.58    1.40
   6  -5   1    3.91    2.27
   6  -5   1    7.27    2.83
   6  -5   1    3.71    0.81
   6   5  -1    5.56    1.26
   6   5  -1    5.51    1.39
  -6  -5   1    6.61    1.42
  -6   5  -1    2.61    1.57
  -6  -5   1    5.89    0.72
  -6   5  -1    3.31    1.41
  -6  -5   1    6.87    1.84
   6  -4   1   14.83    3.70
  -6   4  -1   14.51    3.16
   6  -3   1   11.75    1.15
   6   3  -1   14.47    1.67
   6  -3   1    8.66    2.66
   6   3  -1   15.06    1.48
   6   3  -1   13.54    3.12
  -6   3  -1   12.30    1.89
  -6  -3   1   15.55    2.05
  -6   3  -1   11.24    1.65
  -6   3  -1   10.01    2.54
  -6  -3   1   14.31    1.58
   6   2  -1   13.96    1.62
   6   2  -1   14.67    3.11
  -6  -2   1   15.67    1.90
  -6  -2   1   15.04    1.59
  -6  -2   1   13.92    1.81
   6  -1   1   14.31    1.31
   6  -1   1   14.40    1.55
   6   1  -1   12.06    1.27
   6  -1   1   12.82    2.99
   6   1  -1   11.28    1.42
   6   1  -1   14.01    2.99
  -6  -1   1   13.41    1.73
  -6  -1   1   11.32    1.63
  -6   1  -1   14.91    1.67
  -6  -1   1   13.03    1.46
  -6   1  -1   13.05    1.69
  -6   1  -1   13.88    0.84
  -6   1  -1   11.95    2.69
   6   0  -1   -0.39    0.23
   6   0  -1    0.14    0.53
   6   0   1   -0.07    0.20
   6   0  -1   -0.63    0.81
   6   0   1   -0.20    0.41
   6   0   1    0.05    0.83
  -6   0  -1    0.07    0.85
  -6   0   1    0.50    0.89
  -6   0   1   -0.09    0.40
  -6   0   1   -0.05    0.45
  -6   0  -1   -0.07    0.40
  -6   0   1   -0.06    0.44
  -6   0  -1    0.29    0.42
  -6   0  -1    0.25    0.45
   6  -1  -1   11.76    1.20
   6  -1  -1   12.97    1.90
   6   1   1   13.18    1.30
   6   1   1   12.78    2.91
   6   1   1   16.85    1.58
   6  -1  -1   11.07    2.77
  -6   1   1    9.63    1.51
  -6  -1  -1   14.39    1.39
  -6   1   1   10.53    2.42
  -6   1   1   11.61    1.60
  -6  -1  -1   11.74    1.51
  -6  -1  -1   15.06    1.77
  -6  -1  -1   12.09    2.82
   6  -2  -1   15.31    1.15
   6  -2  -1   13.79    1.76
   6  -2  -1   14.29    3.22
  -6   2   1   14.46    1.82
  -6   2   1   15.04    2.41
   6   3   1   13.13    2.83
   6  -3  -1   11.29    2.99
   6  -3  -1   12.17    1.98
   6   3   1   11.43    1.41
   6  -3  -1   13.66    1.13
   6   3   1   13.49    1.42
  -6   3   1   12.49    1.75
  -6  -3  -1   13.08    1.83
  -6   3   1   13.85    2.83
  -6   3   1   13.77    1.83
  -6  -3  -1   12.78    1.41
  -6  -3  -1   12.06    0.88
  -6  -4  -1   12.30    1.97
   6  -5  -1    8.04    2.96
   6  -5  -1    3.74    2.09
   6   5   1    3.43    1.13
   6   5   1    4.34    1.10
  -6   5   1    5.58    1.94
  -6  -5  -1    4.37    1.14
  -6  -5  -1    3.69    1.40
  -6   5   1    6.46    1.54
   6  -6  -1    6.24    2.90
   6   6   1   10.57    1.73
   6   6   1    8.57    1.76
   6  -6  -1    7.05    2.95
  -6  -6  -1   10.97    1.81
  -6   6   1    5.11    2.13
  -6  -6  -1    9.25    2.27
   6   7   1    1.17    1.07
   6  -7  -1    1.26    1.88
   6  -7  -1    2.87    2.37
  -6  -7  -1    1.66    1.33
  -6  -7  -1    1.03    0.97
   6  -8  -1    5.23    2.93
   6  -8  -1    4.21    2.93
  -6  -8  -1    0.77    1.08
   6  -9  -1   25.24    6.39
   6  -9  -1   35.33    7.43
   7  -9   1   12.64    4.80
   7  -9   1    5.97    3.96
  -7  -9   1   13.83    3.94
   7  -8   1    1.70    2.54
   7  -8   1    1.29    2.42
  -7  -8   1   13.10    2.51
  -7  -8   1   16.51    3.87
   7  -7   1   -1.79    1.34
   7  -7   1    2.14    2.31
   7   7  -1    0.40    1.05
  -7  -7   1    0.30    0.90
  -7   7  -1   -0.05    1.48
  -7  -7   1    0.66    1.12
   7   6  -1    1.59    1.13
   7  -6   1    0.08    1.72
  -7  -6   1    1.29    1.30
  -7  -6   1    2.33    1.10
  -7   6  -1    0.11    1.50
   7   5  -1   19.99    2.42
  -7  -5   1   22.07    3.00
  -7  -5   1   21.13    2.29
  -7  -5   1   21.38    1.45
   7   2  -1   22.66    1.91
   7   2  -1   21.78    4.19
   7   2  -1   20.26    2.05
  -7  -2   1   18.71    1.94
  -7  -2   1   19.77    2.33
   7  -1   1    3.55    1.87
   7  -1   1    4.98    0.95
   7  -1   1    6.02    1.28
  -7   1  -1    3.52    1.15
  -7   1  -1    3.68    1.75
   7   0  -1    0.30    1.15
   7   0  -1   -0.06    0.51
   7   0   1    0.18    0.52
   7   0   1    0.61    1.15
   7   0  -1   -0.06    0.29
   7   0   1    0.15    0.36
  -7   0   1   -0.32    0.43
  -7   0   1   -0.07    0.97
  -7   0  -1    0.21    0.55
  -7   0  -1    0.26    1.02
  -7   0  -1    0.32    0.52
  -7   0   1    0.48    0.63
  -7   0   1    0.25    0.56
   7  -1  -1   18.28    3.88
   7  -1  -1   17.36    2.05
  -7   1   1   22.41    3.32
  -7   1   1   19.18    2.25
  -7   1   1   18.08    2.18
   7  -2  -1   19.46    1.43
   7  -2  -1   18.22    4.03
   7  -2  -1   21.64    2.33
  -7   2   1   20.06    3.12
  -7   2   1   20.58    2.37
  -7   3   1   28.41    3.82
   7   5   1    6.75    1.51
   7   5   1    6.49    1.36
  -7  -5  -1    4.16    1.60
  -7  -5  -1    6.37    1.41
   7  -6  -1    1.08    2.20
   7   6   1    0.51    1.00
  -7   6   1    1.72    1.65
  -7  -6  -1    0.97    1.09
  -7  -6  -1    0.10    0.70
   7  -7  -1    0.94    2.07
   7  -7  -1    0.01    1.67
  -7  -7  -1   -0.02    1.17
  -7  -7  -1   -0.20    0.78
   7  -8  -1    9.53    4.13
   7  -8  -1    9.48    4.29
   7  -9  -1    6.72    3.89
   7  -9  -1   11.90    4.61
  -7  -9  -1   10.90    3.32
  -8  -8   1   18.29    4.27
  -8  -8   1   15.74    3.09
   8  -7   1   -0.41    1.90
  -8   7  -1    0.28    2.03
  -8  -7   1    0.06    1.27
  -8  -7   1    0.31    0.99
   8  -6   1   11.60    4.20
   8   6  -1    2.71    1.42
  -8  -6   1    4.08    1.43
  -8   6  -1   11.34    3.65
  -8  -6   1    2.92    1.61
   8   5  -1    6.70    1.70
   8  -5   1    5.66    2.92
  -8  -5   1    6.79    2.07
  -8  -5   1    8.64    1.82
  -8   5  -1   10.38    3.29
   8  -4   1   20.53    4.90
  -8   4  -1   20.63    4.48
   8   3  -1    0.34    0.66
   8   3  -1    1.06    1.58
   8  -3   1    0.46    1.69
  -8  -3   1    0.09    0.66
  -8   3  -1    2.38    1.86
  -8   3  -1    3.09    1.30
  -8  -3   1    0.31    0.70
   8  -2   1   31.26    2.91
   8  -2   1   31.50    4.80
  -8   2  -1   34.33    3.42
  -8   2  -1   30.69    4.50
   8  -1   1   17.92    2.12
   8  -1   1   21.50    4.33
  -8   1  -1   19.00    3.99
   8   0  -1   -0.03    1.34
   8   0  -1   -0.15    0.61
   8   0   1    0.10    1.28
   8   0   1    0.03    0.41
   8   0   1   -0.15    0.50
  -8   0  -1    0.02    0.55
  -8   0   1    0.02    0.63
  -8   0  -1    0.17    0.66
  -8   0   1    0.20    0.61
  -8   0  -1    0.54    1.21
   8   1   1   16.80    3.73
   8  -2  -1   10.85    3.41
   8  -2  -1    8.19    0.94
   8  -2  -1    8.96    1.93
  -8   2   1    8.81    1.99
  -8   2   1    6.50    2.31
   8  -3  -1    1.41    1.71
   8  -3  -1    0.56    0.88
   8   3   1    1.95    0.89
   8   3   1    3.73    0.95
  -8   3   1    0.28    0.75
  -8  -3  -1    4.04    1.39
  -8  -3  -1    3.26    0.50
  -8  -3  -1    3.45    1.05
  -8   3   1    0.68    1.18
   8   4   1   15.34    1.99
   8  -5  -1   11.48    4.02
   8  -5  -1    8.55    1.08
  -8  -5  -1    9.30    2.34
  -8  -5  -1    9.53    1.72
  -8   5   1   10.61    3.20
   8  -6  -1    1.05    2.32
  -8   6   1    2.34    2.08
   8  -7  -1   -0.29    2.11
  -8  -7  -1   -0.01    1.18
   8  -8  -1   11.06    4.80
  -9  -8   1    7.66    2.99
   9  -7   1    1.18    2.88
  -9  -7   1   10.76    3.15
   9  -6   1    1.33    2.49
  -9  -6   1    1.80    1.21
  -9  -6   1    0.34    1.16
  -9   6  -1    0.52    2.04
   9  -5   1   17.12    5.22
  -9   5  -1   17.95    4.58
   9  -4   1    0.42    1.94
   9   4  -1   -0.07    0.74
  -9  -4   1   -0.23    0.68
  -9  -4   1    0.62    0.42
  -9  -4   1    0.31    1.07
  -9   4  -1   -0.88    1.31
  -9   4  -1   -0.23    0.84
   9   3  -1    0.76    0.85
   9  -3   1   -0.50    1.56
  -9   3  -1    0.04    1.42
  -9  -3   1    1.72    1.18
  -9  -3   1    1.38    0.96
  -9   3  -1    0.16    0.82
   9  -1   1    1.07    1.71
   9   1  -1    1.51    0.93
   9  -1   1    2.89    1.19
   9   1  -1    0.93    1.83
  -9   1  -1    1.92    1.16
  -9  -1   1    0.56    0.88
  -9  -1   1    0.87    0.83
  -9   1  -1    3.25    1.16
  -9   1  -1    3.81    2.24
   9   0   1   -0.35    0.61
   9   0   1    0.21    1.51
   9   0  -1    1.00    1.67
   9   0  -1    0.20    0.72
  -9   0  -1    0.82    1.53
  -9   0   1   -0.08    0.57
  -9   0   1    0.18    0.72
  -9   0  -1    0.25    0.69
  -9   0  -1    0.22    0.72
   9  -1  -1    2.06    1.11
   9   1   1    2.38    1.05
   9  -1  -1    0.59    1.52
  -9   1   1    1.01    0.96
  -9  -1  -1    1.84    0.95
  -9   1   1    1.78    1.81
  -9  -1  -1    1.53    1.05
  -9   1   1    0.26    0.82
   9  -2  -1   46.46    3.95
   9  -2  -1   46.88    6.43
  -9   2   1   41.76    4.08
  -9   2   1   44.17    5.57
   9   3   1   -0.53    0.59
   9  -3  -1    1.12    1.09
   9  -3  -1    0.04    1.89
  -9   3   1   -0.18    0.71
  -9  -3  -1   -0.20    0.72
  -9   3   1    0.72    1.41
  -9  -3  -1    0.14    0.72
   9  -4  -1    1.41    2.13
   9  -4  -1    0.52    0.43
  -9   4   1    0.06    1.36
  -9  -4  -1    0.86    1.07
  -9  -4  -1   -0.06    0.72
   9  -5  -1    0.05    2.13
   9  -6  -1    1.66    2.72
  -9  -6  -1    0.38    1.10
   9  -7  -1    9.32    4.31
   9  -8  -1   14.19    5.67
 -10  -7   1    4.85    2.47
  10  -6   1   -0.09    2.74
 -10   6  -1    3.07    2.79
 -10  -6   1   13.53    3.27
  10  -5   1   13.55    4.84
 -10   5  -1   11.02    3.88
  10   4  -1    5.59    1.68
 -10  -4   1   10.32    1.99
 -10  -4   1   11.15    2.79
  10   3  -1    1.70    1.20
  10  -3   1    0.26    2.16
 -10   3  -1    1.87    1.95
 -10   3  -1    3.62    1.66
 -10  -3   1    0.78    1.06
 -10  -3   1    1.15    1.07
  10   2  -1    9.26    2.03
  10  -2   1    0.44    1.81
  10  -2   1    0.31    0.93
 -10  -2   1   10.23    2.29
 -10   2  -1    0.98    0.92
 -10   2  -1    0.07    1.68
 -10  -2   1    9.84    1.96
  10  -1   1   15.71    2.64
  10  -1   1   15.87    4.47
 -10   1  -1   16.46    2.61
 -10   1  -1   16.88    2.53
 -10   1  -1   15.86    4.22
  10   0  -1   -0.24    1.72
  10   0  -1   -0.66    0.71
  10   0   1    0.10    0.81
 -10   0  -1    0.85    0.97
 -10   0  -1    0.99    1.84
 -10   0  -1   -0.07    0.76
 -10   0   1   -0.26    0.73
 -10   0   1    0.19    0.75
  10   1   1   14.01    2.27
  10  -1  -1    6.11    3.14
  10  -1  -1    7.92    1.96
 -10   1   1    6.38    2.98
 -10   1   1    8.43    1.94
 -10  -1  -1   17.46    2.39
 -10  -1  -1   15.39    2.82
 -10   1   1    9.98    2.38
  10  -2  -1    9.33    2.17
  10  -2  -1    5.81    3.08
 -10   2   1   10.71    2.22
 -10   2   1    8.93    2.18
 -10   2   1    7.80    3.08
  10  -3  -1    0.19    1.08
  10  -3  -1    2.34    2.44
 -10  -3  -1    2.14    1.33
 -10   3   1    2.79    2.12
 -10  -3  -1    2.11    1.04
  10  -4  -1   12.23    4.71
 -10   4   1    7.11    2.90
  10  -5  -1    0.50    2.33
 -10   5   1   -0.68    1.71
 -10  -5  -1   13.93    3.12
  10  -6  -1   18.10    6.11
  10  -7  -1    5.01    3.70
 -10  -7  -1    2.09    1.91
 -11  -6   1   19.99    4.12
 -11   5  -1    9.20    3.79
 -11  -5   1    0.67    1.36
 -11  -4   1    0.71    1.04
 -11   4  -1    0.90    2.13
 -11  -4   1    0.57    1.26
 -11   3  -1    1.01    1.16
 -11   3  -1    1.61    2.23
 -11  -3   1    0.91    1.21
 -11  -3   1    2.01    1.11
  11   2  -1    0.12    0.99
 -11  -2   1    0.33    0.95
 -11   2  -1    3.63    1.52
 -11   2  -1    3.46    2.50
 -11   2  -1    3.48    1.71
 -11  -2   1    0.92    1.22
  11  -1   1    7.52    2.03
  11   1  -1   16.34    2.83
 -11  -1   1   12.16    2.28
 -11   1  -1    9.24    2.38
 -11   1  -1   11.29    3.99
 -11   1  -1    8.90    2.01
 -11  -1   1   10.34    2.51
  11   0  -1    0.28    0.97
 -11   0  -1    0.11    0.89
 -11   0  -1   -0.05    0.81
 -11   0   1   -0.28    0.91
 -11   0   1    0.02    0.85
  11  -1  -1    8.47    3.87
  11  -1  -1   11.27    2.51
 -11   1   1   13.32    2.76
 -11  -1  -1    8.92    2.42
 -11  -1  -1    8.38    1.86
 -11   1   1   14.08    2.54
  11  -2  -1    0.28    1.13
  11  -2  -1    1.93    2.58
 -11   2   1    1.02    2.18
 -11  -2  -1    2.24    1.33
 -11   2   1    0.97    1.08
  11  -3  -1    0.24    2.31
 -11  -3  -1    2.22    1.43
 -11   3   1    0.19    1.03
 -11   3   1    0.32    1.63
  11  -4  -1    2.78    3.20
 -11   4   1   -0.02    2.01
 -11  -4  -1    0.86    1.21
  11  -5  -1    3.11    3.38
 -11  -5  -1    6.58    2.44
  11  -6  -1   22.72    6.93
 -12  -5   1   17.71    3.85
 -12   4  -1    0.62    1.38
 -12   4  -1   -0.47    2.36
 -12  -4   1   -0.93    1.00
 -12   3  -1    1.12    2.46
 -12  -3   1    0.08    1.07
 -12   3  -1    0.20    1.12
 -12  -2   1    0.81    1.03
 -12   2  -1    2.41    1.54
 -12  -2   1    0.35    1.12
 -12   2  -1    1.30    2.61
 -12   1  -1    0.55    1.19
 -12  -1   1    0.45    1.16
 -12   1  -1    0.66    1.11
 -12  -1   1   -0.61    0.96
  12   0  -1    0.46    1.11
 -12   0  -1   -0.01    1.13
 -12   0   1    0.22    1.15
 -12   0   1   -0.09    1.02
  12  -1  -1    2.12    1.47
 -12   1   1   -0.25    1.05
 -12  -1  -1    1.13    1.22
  12  -2  -1    0.35    1.19
 -12  -2  -1    3.38    1.62
 -12   2   1   -0.05    1.16
 -12   3   1   -0.05    1.20
 -12   3   1   -0.32    1.98
 -12  -3  -1    1.12    1.34
 -12  -4  -1    1.11    1.38
 -12   4   1    0.30    1.40
 -12  -5  -1    0.29    1.26
 -13  -3   1    1.55    1.57
 -13   3  -1    0.52    1.66
 -13   0  -1   -1.00    1.11
 -13   0   1    0.38    1.34
 -13  -1  -1    4.70    2.15
 -13   1   1    5.89    2.10
 -13  -2  -1    2.67    1.69
 -13   2   1   -0.56    1.14
 -13  -3  -1    2.77    1.90
 -13   3   1    1.01    1.62
   0  10  -2    0.32    1.92
   0 -10   2    0.80    1.82
   0  -9   2    0.30    1.38
   0   9  -2    1.21    1.56
   0  -8   2    3.09    1.90
   0   8  -2    2.05    1.67
   0   7  -2   33.24    4.13
   0  -7   2   33.10    4.24
   0  -6   2   13.98    1.29
   0   6  -2   12.79    2.71
   0  -6   2   12.65    2.82
   0  -6   2   12.99    2.05
   0   6  -2   14.89    2.70
   0   6  -2   14.92    1.72
   0   5  -2    1.07    0.47
   0   5  -2    1.21    0.58
   0   5  -2    0.82    0.92
   0  -5   2    0.95    0.67
   0   5  -2    0.57    0.76
   0  -5   2    0.94    0.43
   0  -5   2    1.32    0.93
   0   4  -2   59.15    3.70
   0   4  -2   60.34    4.71
   0   4  -2   58.61    3.11
   0  -4   2   58.68    3.85
   0   4  -2   62.88    4.59
   0  -4   2   63.68    4.66
   0  -4   2   59.25    3.45
   0  -4   2   59.44    3.21
   0   3  -2  203.57   11.64
   0  -3   2  196.39    8.87
   0  -3   2  200.02   11.09
   0  -3   2  193.47   10.13
   0   3  -2  203.85   10.04
   0  -3   2  177.87    8.44
   0   3  -2  196.17   11.17
   0  -2   2   55.06    3.09
   0  -2   2   49.85    2.63
   0   2  -2   54.67    3.00
   0  -2   2   55.66    3.54
   0   2  -2   54.80    2.56
   0   2  -2   51.16    3.63
   0  -2   2   52.17    2.62
   0   2  -2   49.67    3.63
   0  -1   2    0.53    0.38
   0   1  -2    0.28    0.19
   0  -1   2    0.43    0.21
   0  -1   2    0.22    0.23
   0   1  -2    0.64    0.41
   0   1  -2    0.23    0.40
   0  -1   2    0.31    0.17
   0  -1   2    0.41    0.23
   0   1  -2    0.38    0.16
   0   0   2  241.64   12.89
   0   0  -2  239.79   12.19
   0   0  -2  245.61    9.97
   0   0  -2  236.10   12.90
   0   0   2  229.17    9.49
   0   0   2  248.80    9.97
   0   0  -2  246.47   12.13
   0   0  -2  241.31   11.93
   0  -1  -2    0.40    0.13
   0  -1  -2    0.46    0.14
   0  -1  -2    0.28    0.26
   0  -1  -2    0.45    0.22
   0   1   2    0.29    0.28
   0  -2  -2   54.15    3.15
   0   2   2   52.83    2.85
   0   3   2  193.94    9.78
   0  -3  -2  197.20   10.54
   0   3   2  188.46    9.79
   0   3   2  195.64   10.31
   0   4   2   57.66    3.57
   0  -4  -2   62.60    4.24
   0   4   2   62.15    3.94
   0   4   2   55.28    3.59
   0   5   2    1.59    0.86
   0   5   2    1.00    0.50
   0  -5  -2    1.10    0.75
   0  -6  -2   14.98    2.38
   0   6   2   13.73    1.71
   0   6   2   15.26    2.25
   0   6   2   14.06    1.72
   0  -7  -2   33.51    4.02
   0   7   2   31.15    2.92
   0   7   2   30.42    3.63
   0  -8  -2    1.29    1.29
   0   8   2    1.03    0.84
   0   8   2    1.10    1.34
   0  -9  -2   -0.20    1.17
   0 -10  -2    0.99    1.88
   1  10  -2    6.63    2.90
   1 -10   2    3.94    2.55
  -1  10  -2    5.33    2.80
  -1 -10   2    5.86    2.89
   1   9  -2    1.80    1.84
   1  -9   2    6.88    2.92
  -1   9  -2    7.38    2.91
   1   8  -2    1.11    1.49
   1  -8   2    0.50    1.25
  -1   8  -2   -0.05    1.05
  -1  -8   2    0.24    1.25
   1   6  -2    8.79    2.07
   1   6  -2    7.09    1.98
   1   6  -2    7.38    1.32
  -1  -6   2    6.38    1.87
  -1   6  -2    3.83    1.67
  -1  -6   2    5.88    1.34
  -1  -6   2    7.27    0.88
  -1   6  -2    3.92    1.04
   1  -5   2   19.86    1.54
   1  -5   2   20.37    2.77
  -1   5  -2   18.77    1.86
  -1   5  -2   19.72    2.45
  -1   5  -2   18.65    1.46
  -1   5  -2   17.86    2.57
   1  -4   2   14.12    1.28
   1   4  -2   20.88    2.38
   1  -4   2   16.92    2.27
   1   4  -2   21.64    1.68
   1  -4   2   16.85    1.66
   1  -4   2   18.84    1.70
   1   4  -2   20.01    1.37
  -1  -4   2   20.53    1.86
  -1   4  -2   18.14    2.15
  -1  -4   2   18.88    1.64
  -1   4  -2   15.99    1.57
  -1   4  -2   16.36    1.26
  -1   4  -2   15.39    2.18
  -1  -4   2   20.25    1.36
  -1   4  -2   15.21    1.56
  -1  -4   2   19.04    2.13
   1  -2   2   11.74    1.03
   1  -2   2   11.95    0.83
   1  -2   2   12.54    1.51
   1  -2   2   11.50    1.03
  -1   2  -2   11.63    1.46
  -1   2  -2   11.87    1.40
  -1   2  -2   13.46    0.84
   1  -1   2  166.72    9.11
   1  -1   2  165.68    7.37
   1   1  -2  184.06    9.40
   1  -1   2  160.01    6.85
   1  -1   2  148.66    8.20
   1  -1   2  151.61    8.31
   1   1  -2  177.13    8.23
  -1   1  -2  164.24    8.93
  -1  -1   2  186.50    8.86
  -1   1  -2  157.44    9.50
  -1  -1   2  168.68    8.24
  -1   1  -2  160.89    8.26
  -1  -1   2  180.60    6.99
  -1  -1   2  172.63    8.40
   1   0  -2  128.36    6.58
   1   0  -2  138.79    5.75
   1   0  -2  126.13    7.15
  -1   0   2  127.88    5.46
  -1   0   2  133.31    6.78
  -1   0   2  133.19    6.37
   1  -1  -2  172.84    8.57
   1  -1  -2  168.44    9.10
   1  -1  -2  179.06    9.01
   1  -1  -2  179.25    7.46
  -1  -1  -2  162.27    8.93
  -1  -1  -2  161.53    6.76
  -1   1   2  174.08    9.14
  -1   1   2  169.10    8.24
  -1  -1  -2  169.93    8.59
  -1   1   2  174.53    8.32
  -1  -1  -2  164.10    9.72
  -1  -1  -2  174.11    8.70
   1   2   2   11.29    0.94
  -1  -2  -2   12.17    0.86
  -1  -2  -2   11.94    1.03
   1  -4  -2   21.13    2.22
   1   4   2   16.86    1.59
   1   4   2   14.29    1.65
   1   4   2   14.61    1.44
   1   4   2   16.85    1.50
  -1   4   2   18.11    1.69
  -1  -4  -2   16.82    1.49
  -1   4   2   20.86    1.69
  -1   4   2   20.45    1.26
  -1  -4  -2   16.71    1.84
  -1   4   2   19.31    1.96
  -1   4   2   20.11    1.57
   1  -5  -2    4.83    1.46
  -1   5   2    3.57    0.90
  -1   5   2    5.26    1.37
   1  -6  -2    6.85    1.95
  -1   6   2    9.81    2.21
  -1   6   2    7.00    1.39
   1   8   2    0.71    0.74
   1   8   2   -0.07    1.07
   1  -8  -2    1.70    1.54
  -1   8   2    1.54    0.94
  -1  -8  -2    1.01    1.05
   1  -9  -2    1.09    1.60
  -1  -9  -2    6.21    2.46
   1 -10  -2    2.65    2.37
  -1 -10  -2    3.37    2.52
   2 -10   2    1.47    2.18
  -2 -10   2    3.55    2.31
   2  -9   2    3.38    2.55
   2   9  -2   -0.91    1.29
  -2   9  -2    2.88    2.14
  -2  -9   2    0.97    1.59
   2   8  -2   12.49    3.29
  -2  -8   2   10.34    3.00
  -2  -8   2    9.53    2.14
   2  -7   2   25.94    4.24
   2   7  -2   33.51    4.17
  -2  -7   2   32.89    3.07
  -2  -7   2   36.84    4.20
  -2   7  -2   33.54    4.31
   2   6  -2   42.40    4.36
   2   6  -2   51.21    3.55
  -2  -6   2   43.88    3.32
  -2  -6   2   43.85    2.67
  -2  -6   2   49.24    4.55
   2  -3   2  108.82    5.09
   2  -3   2  104.33    5.26
   2  -3   2  113.30    6.02
   2  -3   2  115.65    7.34
  -2   3  -2  106.43    5.98
  -2   3  -2  107.10    5.03
  -2   3  -2  107.47    6.75
  -2   3  -2  114.74    7.32
   2  -2   2   36.28    2.00
   2  -2   2   37.25    2.25
   2  -2   2   34.11    1.85
   2  -2   2   34.65    3.07
  -2   2  -2   35.18    2.69
  -2   2  -2   34.59    2.28
  -2   2  -2   35.65    3.00
   2  -1   2  148.44    8.40
   2  -1   2  139.50    8.37
   2  -1   2  140.29    7.41
   2  -1   2  152.77    7.27
   2  -1   2  146.67    6.54
  -2   1  -2  140.45    7.88
  -2   1  -2  141.14    7.33
  -2   1  -2  149.23    8.67
   2  -2  -2   12.81    1.66
   2  -2  -2   14.19    1.29
  -2   2   2   13.35    1.18
  -2   2   2   12.89    0.81
  -2   2   2   12.38    1.27
  -2   2   2   12.07    1.14
  -2   2   2   13.17    1.00
   2  -7  -2   38.30    4.68
   2   7   2   33.06    2.99
  -2   7   2   38.58    4.06
  -2  -7  -2   30.57    3.72
  -2   7   2   36.36    3.23
   2  -8  -2   10.68    3.29
  -2   8   2    9.28    1.99
  -2   8   2   13.41    2.42
   2  -9  -2   -0.82    1.25
  -2  -9  -2    3.14    1.84
   2 -10  -2    6.52    3.21
  -2 -10  -2    0.08    1.21
   3 -10   2   10.04    4.21
  -3 -10   2   15.06    4.24
   3  -9   2    1.04    1.99
   3   9  -2   -0.02    1.06
   3   9  -2    0.11    1.48
  -3   9  -2    1.68    1.86
  -3  -9   2    0.61    1.39
   3   8  -2    9.04    2.21
   3   8  -2    7.95    2.73
  -3  -8   2   11.43    2.35
  -3  -8   2    9.77    2.84
   3  -7   2    4.38    2.31
   3   7  -2    0.36    0.84
  -3  -7   2    0.33    0.78
  -3   7  -2    5.46    2.16
  -3  -7   2    0.10    0.86
   3   6  -2    3.61    1.59
   3   6  -2    4.61    1.08
   3  -6   2    7.38    2.51
  -3  -6   2    3.88    1.20
  -3   6  -2    7.65    1.91
  -3   6  -2    8.22    2.37
  -3  -6   2    4.22    1.60
  -3  -6   2    4.95    0.83
   3   5  -2    3.25    1.08
   3   5  -2    4.58    1.74
   3   5  -2    5.09    1.05
  -3  -5   2    4.23    0.74
  -3  -5   2    4.30    1.41
  -3  -5   2    4.51    1.10
   3   4  -2   50.87    3.32
   3   4  -2   50.17    4.62
  -3  -4   2   50.94    2.80
  -3  -4   2   45.31    3.05
  -3  -4   2   51.57    4.00
  -3  -4   2   52.19    3.70
   3   0   2   67.88    4.88
   3   0   2   72.03    3.33
   3   0   2   70.26    3.72
   3   0   2   68.05    3.97
  -3   0  -2   72.30    3.70
  -3   0  -2   69.95    5.07
  -3   0  -2   66.16    4.16
  -3   0  -2   71.82    3.98
   3  -4  -2   55.51    4.75
  -3   4   2   50.44    4.01
  -3   4   2   51.89    3.60
  -3   4   2   49.15    3.49
  -3   4   2   49.38    3.21
  -3   4   2   50.20    2.72
   3  -5  -2    4.29    1.65
  -3   5   2    5.41    1.51
  -3  -5  -2    0.47    0.52
  -3   5   2    3.89    1.04
   3   6   2    8.59    1.45
   3  -6  -2    4.49    1.91
  -3   6   2    5.51    1.76
  -3   6   2    5.16    1.32
  -3  -6  -2    6.71    1.37
  -3  -6  -2    7.32    1.86
   3  -7  -2   -0.14    1.14
   3   7   2    4.88    1.21
  -3   7   2   -0.16    0.92
  -3  -7  -2    4.89    1.71
   3  -8  -2    7.89    2.92
  -3  -8  -2    0.84    1.16
   3  -9  -2   -0.57    1.44
  -3  -9  -2    1.63    1.65
   3 -10  -2    7.85    3.76
  -3 -10  -2    9.91    3.30
  -4 -10   2   10.94    3.70
   4   9  -2   -0.56    1.14
   4   9  -2   -0.61    1.29
   4  -9   2    0.68    2.30
  -4  -9   2   -0.91    0.92
  -4   9  -2   -0.14    1.68
  -4  -9   2   -0.37    1.04
   4   8  -2   17.24    3.03
  -4  -8   2   16.78    3.74
  -4  -8   2   19.36    2.90
   4   7  -2   10.66    2.23
  -4  -7   2    8.94    1.89
  -4  -7   2   12.58    2.89
   4   6  -2   19.31    2.34
  -4  -6   2   20.60    1.55
  -4  -6   2   19.32    2.20
  -4  -6   2   20.64    2.93
   4  -5   2    2.73    1.78
   4   5  -2    0.95    0.74
   4   5  -2    0.68    1.08
   4  -5   2    1.83    0.59
   4   5  -2    0.25    0.43
  -4   5  -2    1.34    1.23
  -4   5  -2    1.52    1.00
  -4  -5   2    0.23    0.58
  -4  -5   2    0.60    0.78
  -4  -5   2    0.44    0.35
   4  -3   2   20.68    2.96
   4   3  -2   23.44    1.92
   4   3  -2   22.27    1.73
   4  -3   2   18.77    1.71
   4  -3   2   19.33    1.41
   4   3  -2   24.29    3.10
  -4   3  -2   17.69    2.18
  -4  -3   2   22.51    2.25
  -4   3  -2   18.21    2.57
  -4  -3   2   22.23    2.15
  -4  -3   2   25.87    1.93
   4   0  -2   17.31    2.45
   4   0   2   11.21    2.18
   4   0   2   10.36    1.25
   4   0   2   10.99    0.99
  -4   0  -2   11.28    1.27
  -4   0  -2    9.44    1.07
  -4   0  -2   11.79    2.23
  -4   0  -2   10.45    0.80
   4   3   2   16.82    2.21
   4  -3  -2   23.92    3.08
   4   3   2   18.53    1.91
   4   3   2   18.49    1.57
   4   3   2   15.42    1.43
   4  -3  -2   21.89    1.26
  -4   3   2   21.26    1.95
  -4  -3  -2   17.47    1.43
  -4   3   2   23.88    2.41
  -4   3   2   22.55    2.00
  -4  -3  -2   18.54    1.94
  -4   3   2   23.58    1.68
   4   5   2    1.54    0.61
   4  -5  -2    0.08    1.11
   4   5   2    2.23    0.83
  -4  -5  -2    0.53    0.56
  -4   5   2    0.84    0.64
  -4   5   2    0.57    0.80
  -4  -5  -2    1.66    0.91
   4  -7  -2   12.05    3.50
   4   7   2    1.42    0.96
  -4  -7  -2    2.08    1.06
  -4  -7  -2    1.65    1.18
  -4   7   2   10.27    2.03
   4   8   2    2.71    1.40
   4  -8  -2   15.55    4.26
  -4  -8  -2    3.03    1.69
   4  -9  -2    0.44    1.85
  -4  -9  -2    0.29    1.20
   4 -10  -2    7.70    3.78
   5  -9   2   -0.42    1.99
   5   9  -2    0.65    1.24
  -5  -9   2    1.15    1.32
  -5  -9   2    0.84    1.59
   5  -8   2    0.00    1.72
   5   8  -2    0.37    1.13
  -5  -8   2    0.46    1.25
  -5  -8   2   -0.11    0.90
  -5   8  -2   -0.40    1.39
   5  -7   2   13.72    4.14
   5   7  -2   15.53    2.76
  -5   7  -2   15.85    3.77
  -5  -7   2   16.50    2.57
  -5  -7   2   15.68    3.29
   5   6  -2    2.71    1.24
   5  -6   2    2.67    2.21
  -5  -6   2    1.96    1.01
  -5   6  -2    4.52    1.74
  -5  -6   2    2.57    0.60
  -5  -6   2    3.16    1.55
  -5   6  -2    7.07    2.32
   5  -5   2    0.91    0.47
   5  -5   2    2.52    1.71
   5   5  -2    0.48    0.72
   5   5  -2    0.34    1.11
   5   5  -2    1.82    0.75
  -5  -5   2    2.87    0.99
  -5   5  -2    1.18    1.00
  -5   5  -2    1.16    1.21
  -5  -5   2    1.50    1.10
  -5  -5   2    1.56    0.50
   5   4  -2   44.91    4.86
   5   4  -2   48.74    3.44
   5   4  -2   57.13    3.53
  -5  -4   2   47.60    3.31
  -5  -4   2   50.76    2.87
  -5  -4   2   48.62    4.16
   5  -3   2   18.76    1.47
   5  -3   2   17.83    3.41
   5   3  -2   27.96    3.52
   5  -3   2   17.89    3.50
   5  -3   2   19.27    1.79
  -5  -3   2   27.55    2.07
  -5   3  -2   17.84    2.24
  -5   3  -2   20.17    2.92
  -5   3  -2   21.03    2.05
  -5  -3   2   27.41    2.45
   5   2  -2    6.89    1.26
   5   2  -2   10.08    1.08
   5  -2   2   16.52    3.03
   5   2  -2    9.17    2.36
  -5  -2   2   11.26    1.52
  -5   2  -2   15.54    1.74
  -5  -2   2   11.23    1.32
  -5  -2   2    9.21    1.60
   5   0   2  111.05    5.45
   5   0  -2   79.80    5.11
   5   0   2  105.47    7.39
   5   0  -2   88.11    5.29
   5   0  -2   96.27    7.48
   5   0   2  109.92    5.00
  -5   0  -2  105.54    4.74
  -5   0  -2  103.78    6.10
  -5   0  -2  100.91    5.08
  -5   0  -2  105.75    7.52
  -5   0  -2  114.91    5.89
  -5   0   2   81.69    5.80
  -5   0   2   85.28    4.92
   5  -2  -2    9.78    1.55
   5   2   2   15.81    2.33
   5  -2  -2    9.24    0.81
   5  -2  -2    9.87    2.50
  -5   2   2    8.92    1.93
  -5   2   2    8.62    1.28
  -5   2   2    9.35    1.38
   5   3   2   18.00    2.66
   5   3   2   21.03    1.85
   5  -3  -2   28.28    2.47
   5  -3  -2   30.99    3.78
   5   3   2   20.92    1.78
   5  -3  -2   28.11    1.53
  -5   3   2   27.92    2.41
  -5  -3  -2   18.88    1.64
  -5  -3  -2   18.16    2.15
  -5   3   2   28.55    2.41
  -5   3   2   28.59    2.96
   5  -4  -2   51.13    5.47
   5  -4  -2   52.05    5.51
  -5   4   2   51.51    3.86
  -5   4   2   51.70    3.90
  -5   4   2   46.28    4.38
   5  -5  -2    2.72    1.83
   5   5   2    2.57    0.79
   5   5   2    1.62    0.79
  -5  -5  -2    1.91    1.01
  -5  -5  -2    1.74    0.72
  -5   5   2    1.87    0.90
  -5   5   2    1.09    0.98
   5   6   2    5.72    1.45
   5   6   2    5.43    1.18
   5  -6  -2    1.81    1.90
  -5   6   2    2.51    1.10
  -5  -6  -2    5.76    1.74
  -5  -6  -2    5.15    1.24
  -5   6   2    3.13    1.61
   5  -7  -2   12.65    3.94
   5   7   2   16.05    2.48
   5   7   2   14.47    1.94
  -5  -7  -2   15.79    2.29
  -5  -7  -2   15.67    3.08
   5  -8  -2    0.73    1.82
  -5  -8  -2    0.03    0.81
  -5  -8  -2   -0.50    0.99
   5  -9  -2    2.97    2.63
  -5  -9  -2    1.27    1.49
   6  -9   2    0.45    2.40
   6   9  -2    0.13    1.29
   6  -9   2   -0.93    2.36
  -6  -9   2    2.62    2.06
  -6  -9   2   -0.10    1.16
   6   8  -2    0.74    1.24
   6  -8   2    4.14    3.18
   6  -8   2    2.57    2.63
  -6  -8   2    1.27    1.44
  -6  -8   2    1.40    1.23
  -6   8  -2    5.94    2.82
   6   7  -2   18.25    2.91
  -6  -7   2   19.14    3.86
  -6  -7   2   19.95    2.87
   6  -6   2    8.29    3.18
   6  -6   2    8.42    3.29
   6   6  -2    1.10    1.04
  -6  -6   2    2.17    0.58
  -6  -6   2    2.76    1.21
  -6   6  -2    8.42    2.75
  -6  -6   2    3.12    1.48
   6   5  -2    4.13    1.33
   6   5  -2    4.51    2.04
  -6  -5   2    4.17    1.49
  -6  -5   2    3.48    1.20
  -6  -5   2    3.54    0.74
   6   2  -2    0.06    0.29
   6   2  -2    0.58    1.21
   6  -2   2    2.79    0.74
   6   2  -2    0.11    0.55
   6  -2   2    1.40    1.36
  -6   2  -2    2.79    1.01
  -6   2  -2    2.21    0.49
  -6   2  -2    2.46    1.44
  -6  -2   2    0.08    0.52
  -6  -2   2    0.00    0.47
  -6  -2   2   -0.26    0.46
   6   1  -2   14.64    1.32
   6  -1   2   12.92    1.47
   6   1  -2   13.08    3.01
   6  -1   2   10.33    1.17
   6  -1   2   10.50    2.65
   6   1  -2   15.15    1.62
  -6   1  -2   12.32    2.82
  -6   1  -2   11.42    0.91
  -6  -1   2   15.00    1.84
  -6   1  -2   10.63    1.43
  -6   1  -2   11.90    1.66
  -6  -1   2   13.62    1.52
  -6  -1   2   14.76    1.77
   6   0   2   23.15    3.24
   6   1   2   12.60    1.28
   6   1   2   13.30    1.37
   6   1   2   13.82    2.88
   6  -1  -2   12.93    1.66
   6  -1  -2   12.18    1.21
   6  -1  -2   15.98    3.35
  -6   1   2   10.63    2.43
  -6   1   2   15.15    1.75
  -6  -1  -2   12.25    1.64
  -6  -1  -2   12.56    2.89
  -6  -1  -2   10.83    1.21
   6   2   2    3.27    1.54
   6   2   2    3.34    0.81
   6   2   2    2.51    0.65
  -6  -2  -2    2.88    0.73
  -6  -2  -2    3.48    0.36
  -6  -2  -2    2.23    0.92
   6   5   2    0.32    0.58
   6  -5  -2    4.56    2.31
   6  -5  -2    1.81    1.81
  -6  -5  -2    0.05    0.66
  -6   5   2    4.77    1.93
  -6   5   2    5.43    1.46
   6   6   2    6.55    1.41
   6  -6  -2    2.85    2.23
   6   6   2    5.13    1.37
  -6  -6  -2    6.14    1.80
  -6   6   2    1.60    1.52
  -6  -6  -2    6.87    1.49
   6  -7  -2   20.04    4.95
   6  -7  -2   18.23    4.74
   6  -8  -2    2.68    2.35
   6  -8  -2    0.73    2.26
  -6  -8  -2    2.75    1.80
   6  -9  -2    4.19    3.22
   6  -9  -2   -0.59    2.18
  -6  -9  -2   -0.17    1.30
  -7  -9   2    1.51    1.92
  -7  -9   2    2.19    1.45
   7  -8   2    4.92    3.51
   7  -8   2    6.21    3.58
  -7   8  -2    7.59    3.41
   7  -7   2    4.08    3.01
   7  -7   2    8.12    3.83
  -7   7  -2    5.19    2.65
  -7  -7   2    0.75    1.03
  -7  -7   2    0.97    1.33
   7   6  -2    7.01    1.87
   7  -6   2   11.88    4.00
  -7  -6   2    6.92    2.29
  -7   6  -2   13.26    3.65
  -7  -6   2    8.09    1.81
   7  -5   2    0.00    1.51
   7   5  -2    4.76    1.48
  -7  -5   2    4.47    0.82
  -7  -5   2    3.78    1.25
  -7  -5   2    5.34    1.76
   7  -4   2    3.30    2.16
   7   4  -2    1.27    1.44
   7   4  -2    2.90    1.19
  -7   4  -2    3.59    1.43
  -7  -4   2    2.65    0.66
  -7   4  -2    4.72    2.15
  -7  -4   2    3.06    1.32
  -7  -4   2    3.23    1.09
   7   3  -2   38.01    4.84
   7   3  -2   36.21    3.08
  -7  -3   2   36.34    2.94
  -7  -3   2   39.57    3.65
   7   2  -2    3.94    2.03
   7  -2   2    2.50    1.75
   7   2  -2    5.11    1.27
  -7  -2   2    3.75    1.21
  -7   2  -2    2.51    1.67
  -7   2  -2    2.98    1.19
  -7  -2   2    5.69    1.24
   7   1  -2   40.22    5.05
   7   1  -2   36.88    3.02
  -7  -1   2   39.47    3.50
  -7  -1   2   42.17    3.03
  -7  -1   2   40.51    3.46
   7   0   2   40.79    2.91
   7   0   2   40.97    2.89
   7   0   2   37.50    4.59
  -7   0  -2   44.85    3.62
  -7   0  -2   40.38    2.78
  -7   0  -2   37.20    4.70
   7  -1  -2   35.05    3.03
   7  -1  -2   42.05    5.17
  -7   1   2   35.55    2.81
  -7   1   2   33.47    4.18
  -7   1   2   36.35    3.27
  -7   1   2   41.76    3.37
   7  -2  -2    4.54    1.26
   7   2   2    2.99    1.71
   7   2   2    3.66    0.97
   7  -2  -2    7.75    2.71
   7   2   2    2.70    0.76
  -7   2   2    4.89    1.86
  -7  -2  -2    2.45    1.02
  -7   2   2    5.25    1.44
  -7  -2  -2    2.82    0.39
  -7   2   2    6.93    1.53
  -7  -2  -2    2.54    0.79
   7  -3  -2   36.70    2.20
   7  -3  -2   33.81    3.24
   7  -3  -2   41.83    5.41
  -7   3   2   38.00    4.28
  -7   3   2   34.89    3.30
  -7   3   2   40.25    3.50
   7   4   2    4.16    1.12
   7   4   2    3.71    0.94
   7  -4  -2    3.49    2.21
   7  -4  -2    3.03    0.63
  -7  -4  -2    6.02    1.22
  -7  -4  -2    3.29    1.30
  -7   4   2    3.59    1.35
  -7   4   2    1.39    1.33
   7  -5  -2    2.80    2.21
  -7   5   2    5.86    2.15
  -7  -5  -2    0.54    0.67
  -7  -5  -2    0.62    0.89
   7  -6  -2    7.24    3.27
   7   6   2   13.46    1.89
  -7  -6  -2   13.49    2.78
   7  -7  -2    2.77    2.63
   7  -7  -2    0.71    2.02
  -7  -7  -2    4.65    1.92
   7  -8  -2    3.30    2.78
   7  -8  -2   -0.77    1.80
  -7  -8  -2    6.17    2.46
   7  -9  -2    0.27    2.37
   7  -9  -2    1.46    2.65
   8  -8   2    0.15    2.91
  -8  -8   2    0.54    1.23
  -8  -8   2   -0.49    1.28
   8   7  -2   17.91    3.07
  -8  -7   2   25.58    4.01
  -8  -7   2   23.87    2.92
   8   6  -2    6.75    1.89
  -8  -6   2    7.93    2.44
  -8  -6   2    6.92    1.74
  -8   6  -2    1.45    1.91
   8  -5   2    0.03    1.68
   8   5  -2    0.60    0.95
  -8   5  -2    0.09    0.85
  -8   5  -2    0.11    1.32
  -8  -5   2    0.35    0.94
  -8  -5   2    0.88    0.48
  -8  -5   2    1.47    0.97
   8  -4   2    3.77    2.39
  -8  -4   2    0.76    0.97
  -8  -4   2    0.54    0.79
  -8   4  -2    4.37    1.61
  -8   4  -2    3.13    2.03
   8   3  -2   22.83    4.57
   8   3  -2   22.69    2.48
   8  -3   2   12.98    3.77
  -8  -3   2   25.23    2.89
  -8   3  -2   14.13    3.73
  -8   3  -2   15.62    2.46
  -8  -3   2   25.56    2.46
   8   2  -2    7.09    1.55
   8  -2   2    6.31    2.67
   8   2  -2    4.83    2.40
  -8   2  -2    6.03    1.63
  -8  -2   2    5.46    1.33
  -8   2  -2    7.51    2.66
  -8  -2   2    6.26    1.60
   8  -1   2   10.16    3.05
   8  -1   2    8.98    1.66
   8   1  -2    5.00    2.47
   8   1  -2    5.76    1.53
  -8  -1   2    4.55    1.41
  -8   1  -2    9.08    1.93
  -8  -1   2    6.71    1.46
  -8   1  -2    9.75    2.91
   8   0   2   64.29    3.96
   8   0  -2   47.36    3.94
   8   0   2   57.69    3.89
   8   0  -2   52.13    6.35
   8   0   2   58.01    6.18
  -8   0  -2   66.11    6.70
  -8   0   2   56.08    4.56
  -8   0  -2   66.91    4.94
  -8   0  -2   63.06    3.78
  -8   0   2   46.47    3.72
   8   1   2   10.59    3.36
   8  -1  -2    5.11    1.46
   8   1   2    8.37    1.50
   8  -1  -2    6.26    2.72
  -8  -1  -2   11.82    1.63
  -8  -1  -2    7.74    2.79
  -8  -1  -2   10.59    1.97
  -8   1   2    2.67    1.04
  -8   1   2    6.30    1.67
  -8   1   2    5.80    2.41
   8   2   2    6.70    1.41
   8  -2  -2    6.72    0.85
   8  -2  -2    7.26    1.78
   8   2   2    5.95    1.19
   8  -2  -2    6.85    2.96
  -8   2   2    5.96    1.56
  -8  -2  -2    6.01    1.65
  -8   2   2    7.93    2.60
  -8  -2  -2    6.63    1.29
   8   3   2   15.10    1.76
   8  -3  -2   22.10    2.66
   8   3   2   14.89    1.70
   8  -3  -2   28.35    5.58
  -8   3   2   21.30    3.44
  -8  -3  -2   12.53    1.59
  -8  -3  -2   12.05    2.34
   8  -4  -2    0.11    1.51
   8   4   2    4.35    1.10
   8  -4  -2    0.75    0.41
  -8  -4  -2    4.47    1.18
  -8   4   2    0.27    1.14
  -8  -4  -2    4.13    1.57
   8  -5  -2   -0.61    1.56
  -8   5   2   -0.14    1.26
  -8  -5  -2   -0.08    0.94
   8  -6  -2   11.36    4.25
   8  -7  -2   22.05    5.78
   8  -8  -2   -1.31    2.05
  -8  -8  -2    1.95    1.84
  -9  -8   2   -0.37    1.45
   9  -7   2    1.57    3.18
  -9   7  -2    4.11    2.92
  -9  -7   2    5.42    2.46
  -9  -7   2    7.14    1.91
   9   6  -2    0.59    1.12
   9  -6   2   -0.32    2.34
  -9  -6   2    1.10    1.09
  -9  -6   2    0.78    1.28
  -9   6  -2    0.19    1.85
   9  -5   2    6.05    3.36
   9   5  -2    6.42    1.87
  -9  -5   2    7.51    1.84
  -9   5  -2    6.47    3.18
  -9  -5   2    6.76    2.26
   9   4  -2    6.25    1.81
  -9  -4   2    7.50    1.12
  -9  -4   2    8.34    2.24
  -9  -4   2    8.00    1.75
   9  -3   2   12.44    4.11
  -9   3  -2   14.10    3.86
   9  -2   2   -0.20    1.70
   9   2  -2    4.10    1.39
   9   2  -2    4.61    2.47
  -9   2  -2    1.34    1.61
  -9  -2   2    5.92    1.50
  -9  -2   2    4.58    1.53
   9  -1   2   30.41    2.92
   9  -1   2   36.26    5.24
  -9   1  -2   33.37    2.84
  -9   1  -2   34.81    3.63
  -9   1  -2   29.74    4.94
   9   0  -2   23.02    5.12
   9   0  -2   22.35    2.63
  -9   0   2   21.60    2.74
   9  -1  -2   10.89    3.69
   9  -1  -2   10.80    2.18
  -9   1   2    9.71    1.98
  -9   1   2   11.24    2.30
  -9   1   2    9.37    3.04
   9  -2  -2    4.93    0.86
   9  -2  -2    2.79    2.46
   9  -2  -2    6.77    1.85
  -9   2   2    4.29    2.24
  -9   2   2    6.44    1.80
  -9   2   2    3.95    1.36
   9  -3  -2   -0.46    1.77
   9  -4  -2    7.68    3.66
   9  -4  -2    7.39    0.96
  -9   4   2    8.99    2.99
   9  -5  -2    7.67    3.87
  -9  -5  -2    9.21    2.55
   9  -6  -2    1.50    2.51
  -9  -6  -2   -0.16    1.09
   9  -7  -2    6.36    3.79
  -9  -7  -2    3.13    2.07
   9  -8  -2   -0.41    2.80
 -10  -7   2   -0.09    1.55
 -10  -6   2   12.88    3.25
 -10  -6   2   11.71    2.45
  10   5  -2    0.55    1.13
 -10  -5   2    0.64    1.11
 -10  -5   2    1.27    1.24
 -10   5  -2    1.38    2.19
  10   4  -2    8.40    2.05
 -10  -4   2   11.03    2.18
 -10  -4   2   11.70    1.29
 -10  -4   2   11.92    2.90
  10   3  -2    0.69    0.97
 -10   3  -2    6.93    2.11
 -10   3  -2    8.85    3.32
 -10  -3   2    1.07    1.03
  10   2  -2   -0.49    0.83
  10   2  -2    0.18    1.68
 -10   2  -2    0.82    1.04
 -10  -2   2    0.83    0.99
 -10   2  -2    2.18    1.14
 -10  -2   2    0.41    0.91
 -10   2  -2    1.23    1.91
 -10   1  -2   35.99    5.72
  10   0  -2    5.85    1.81
  10   0  -2    4.79    2.73
 -10   0   2    7.78    1.84
 -10   0  -2   13.07    2.04
 -10   0  -2   13.71    4.25
 -10   0   2    6.01    1.86
  10  -2  -2    0.37    2.02
  10  -2  -2    1.09    1.19
 -10  -2  -2    1.69    1.06
 -10   2   2    0.19    1.49
 -10   2   2    0.67    0.95
  10  -3  -2   -0.86    1.98
  10  -3  -2    1.46    1.30
 -10  -3  -2    8.49    2.21
 -10   3   2    1.21    1.66
  10  -4  -2    7.52    3.92
 -10   4   2    7.96    3.00
  10  -5  -2    1.78    2.76
 -10  -5  -2    1.67    1.48
  10  -6  -2   14.82    5.43
  10  -7  -2    0.73    3.16
 -10  -7  -2    7.51    2.75
 -11  -6   2    3.90    2.03
 -11   5  -2    0.37    2.07
 -11  -5   2    2.03    1.49
 -11  -5   2    2.96    1.80
 -11  -4   2    5.94    1.79
 -11  -4   2    5.89    2.23
  11   3  -2    0.98    1.22
 -11   3  -2    1.01    1.30
 -11   3  -2    0.67    2.15
 -11  -3   2    0.47    1.05
 -11  -3   2    1.32    1.24
  11   2  -2    0.80    1.07
 -11  -2   2    0.69    1.12
 -11   2  -2    0.51    0.96
 -11   2  -2    0.38    1.01
 -11  -2   2   -0.12    0.96
 -11   2  -2   -0.10    1.84
  11   1  -2    1.12    1.09
 -11   1  -2    0.40    2.10
 -11  -1   2    1.03    1.12
 -11  -1   2    0.47    1.01
 -11   1  -2    1.36    1.33
 -11   1  -2    1.64    1.15
  11   0  -2   61.79    5.16
  11   0  -2   63.81    8.27
 -11   0   2   71.71    5.11
 -11   0   2   66.56    5.76
  11  -1  -2    1.72    1.27
  11  -1  -2    1.04    2.06
 -11   1   2    0.15    1.00
 -11  -1  -2    1.37    1.26
  11  -2  -2    0.30    1.10
  11  -2  -2   -1.47    1.85
 -11  -2  -2   -0.53    0.79
 -11   2   2    0.01    1.04
  11  -3  -2    0.31    1.19
  11  -3  -2    0.56    2.44
 -11  -3  -2    0.81    1.08
 -11   3   2    2.40    2.54
 -11   3   2    1.25    1.29
  11  -4  -2    3.44    3.56
 -11  -4  -2    0.20    1.05
  11  -5  -2    3.06    3.48
 -11  -5  -2    0.51    1.40
  11  -6  -2    0.93    3.03
 -11  -6  -2    6.45    2.52
 -12  -5   2    5.87    2.34
 -12   4  -2    2.31    1.55
 -12  -4   2    1.35    1.57
 -12   4  -2    1.85    2.63
 -12  -4   2    0.71    1.34
 -12  -3   2    1.86    1.30
 -12   3  -2   -0.57    2.30
 -12   3  -2    0.66    1.32
 -12  -3   2    1.48    1.46
 -12  -2   2    5.85    1.89
 -12   2  -2   -0.30    2.34
 -12  -2   2    6.11    2.10
 -12   2  -2    0.35    1.19
  12   1  -2    0.04    1.05
 -12  -1   2    1.42    1.35
 -12   1  -2    0.84    2.47
 -12   1  -2    1.48    1.46
  12   0  -2   10.93    2.70
 -12   0   2   13.33    2.66
  12  -1  -2    1.08    2.52
  12  -1  -2   -0.61    1.19
 -12  -1  -2    0.47    1.18
 -12   1   2    0.88    1.19
  12  -2  -2    6.61    2.31
  12  -2  -2    8.62    4.32
 -12   2   2    4.69    1.93
  12  -3  -2    3.46    3.37
 -12  -3  -2    0.90    1.35
 -12   3   2    2.33    1.72
  12  -4  -2    0.13    2.95
 -12   4   2   -0.97    1.19
 -12  -4  -2    2.17    1.55
  12  -5  -2   10.75    5.34
 -13  -2   2    2.67    1.68
 -13  -1   2   12.28    2.66
 -13   0   2    1.26    1.50
 -13   0  -2   10.20    2.86
  13  -1  -2    9.67    2.65
 -13   1   2   10.65    2.53
  13  -2  -2    0.41    1.52
 -13   2   2    2.86    1.65
 -13  -2  -2   -0.55    1.14
 -13   3   2    8.95    2.62
 -13  -3  -2   -0.01    1.39
   0  10  -3    3.07    2.57
   0 -10   3    1.80    2.06
   0  -9   3   15.63    4.11
   0   9  -3   17.02    4.18
   0   8  -3   -0.27    1.12
   0  -8   3   -0.53    1.07
   0   7  -3    4.00    1.85
   0  -7   3    2.55    1.55
   0   6  -3   40.45    4.12
   0  -6   3   42.41    3.23
   0  -6   3   44.32    4.56
   0  -6   3   39.47    2.59
   0   6  -3   40.30    4.38
   0   5  -3  107.68    7.75
   0  -5   3  112.98    7.68
   0   5  -3  103.44    5.20
   0  -5   3  101.22    5.33
   0   5  -3  105.13    6.12
   0  -5   3  104.70    5.60
   0   5  -3  104.56    7.33
   0  -4   3    8.28    1.27
   0  -4   3    9.65    0.96
   0   4  -3    7.49    1.72
   0  -4   3   10.14    1.30
   0  -4   3   10.77    2.08
   0   4  -3    8.20    0.85
   0   4  -3    8.35    1.07
   0   4  -3   10.85    1.78
   0   3  -3   41.51    3.43
   0  -3   3   40.76    2.75
   0   3  -3   44.15    2.64
   0  -3   3   37.15    2.24
   0   3  -3   38.68    3.36
   0  -3   3   38.36    3.25
   0  -3   3   43.73    2.50
   0   3  -3   41.85    2.19
   0   2  -3   95.38    4.62
   0  -2   3   90.34    4.05
   0  -2   3   85.97    4.67
   0  -2   3   90.54    4.01
   0   2  -3   87.20    5.50
   0  -2   3   79.71    5.24
   0   2  -3   84.82    3.94
   0  -2   3   86.38    4.71
   0  -2   3   87.27    4.68
   0  -2   3   82.29    4.05
   0   2  -3   78.38    5.49
   0  -1   3   33.67    2.27
   0  -1   3   32.86    1.88
   0   1  -3   33.23    2.44
   0  -1   3   35.18    1.61
   0  -1   3   34.39    1.91
   0   1  -3   30.95    2.42
   0   1  -3   32.85    1.84
   0  -1   3   32.08    1.73
   0   0  -3   -0.09    0.22
   0   0  -3    0.02    0.26
   0   0  -3   -0.05    0.20
   0   0   3   -0.07    0.17
   0   0  -3   -0.15    0.20
   0   0  -3   -0.18    0.27
   0  -1  -3   34.46    1.78
   0  -1  -3   34.25    2.03
   0   1   3   32.88    2.06
   0  -1  -3   35.51    2.18
   0  -2  -3   84.07    4.72
   0  -2  -3   88.75    4.68
   0   3   3   42.40    2.50
   0  -3  -3   41.40    2.83
   0   3   3   41.50    2.47
   0   4   3   10.40    1.10
   0   4   3    9.33    1.07
   0  -4  -3    9.45    1.36
   0   5   3  103.23    5.92
   0  -5  -3   99.81    6.74
   0   5   3   99.64    6.81
   0   5   3  106.05    5.94
   0  -6  -3   40.67    4.04
   0   6   3   43.54    3.30
   0   6   3   44.27    3.97
   0   7   3    1.94    1.23
   0  -7  -3    1.61    1.32
   0   7   3    2.00    0.91
   0   7   3    3.16    1.06
   0   8   3    0.10    0.64
   0  -8  -3    0.88    1.20
   0  -9  -3   16.61    4.00
   0 -10  -3    2.34    1.89
   1 -10   3   -0.34    1.73
  -1 -10   3    1.09    1.94
   1   9  -3   18.44    4.28
   1  -9   3    9.53    3.49
  -1   9  -3    7.40    2.92
  -1  -9   3    9.50    3.07
   1   8  -3    2.56    1.80
   1  -8   3    3.91    2.09
  -1   8  -3    3.98    2.19
  -1  -8   3    2.22    1.67
   1   7  -3   10.80    2.84
  -1  -7   3    7.15    2.35
  -1  -7   3    7.10    1.11
  -1  -7   3    7.14    1.68
   1  -6   3   14.85    3.13
  -1   6  -3   16.01    3.17
  -1   6  -3   12.30    2.50
   1  -5   3   13.66    2.78
   1  -5   3   22.38    2.09
   1  -5   3   21.00    1.65
  -1   5  -3   20.00    1.90
  -1   5  -3   21.65    2.67
  -1   5  -3   21.04    1.56
  -1   5  -3   21.51    2.87
   1  -4   3    9.44    2.06
   1  -4   3   11.00    1.07
   1  -4   3    8.61    1.31
   1  -4   3   11.68    1.34
  -1   4  -3    9.07    1.96
  -1   4  -3   10.86    2.04
  -1   4  -3   10.88    1.24
  -1   4  -3   10.85    0.97
   1  -1   3   88.02    4.16
   1  -1   3   87.85    3.69
   1  -1   3   89.77    4.96
   1   1  -3   74.01    4.08
   1  -1   3   89.17    4.25
   1   1  -3   75.86    3.87
   1  -1   3   94.69    3.61
   1   1  -3   66.61    4.96
   1   1  -3   71.30    3.55
  -1  -1   3   73.71    4.26
  -1   1  -3   89.82    4.80
  -1  -1   3   72.36    4.13
  -1   1  -3   95.43    5.25
  -1  -1   3   73.36    4.56
  -1  -1   3   71.34    3.65
   1   0  -3   -0.34    0.40
   1   0  -3   -0.07    0.27
   1   0  -3    0.08    0.19
   1   0   3    0.09    0.12
   1   0   3   -0.01    0.07
   1   0   3    0.03    0.08
  -1   0   3    0.06    0.09
  -1   0  -3    0.08    0.22
  -1   0  -3    0.01    0.19
  -1   0   3   -0.01    0.07
  -1   0  -3   -0.23    0.33
  -1   0  -3   -0.03    0.34
  -1   0  -3    0.14    0.14
  -1   0  -3    0.22    0.41
  -1   0   3    0.04    0.26
   1  -1  -3   74.17    4.45
   1  -1  -3   72.02    3.97
   1  -1  -3   75.03    4.45
   1  -1  -3   74.91    4.67
   1   1   3   95.14    3.64
  -1  -1  -3   89.28    4.40
  -1  -1  -3   98.94    5.37
  -1  -1  -3   91.86    4.55
  -1  -1  -3   96.37    4.64
   1   5   3   20.63    1.85
   1   5   3   20.19    1.90
   1   5   3   20.52    1.85
  -1  -5  -3   20.16    2.25
  -1  -6  -3   13.49    2.15
   1  -7  -3    7.36    2.29
  -1   7   3    9.53    2.28
  -1   7   3    7.72    1.62
   1  -8  -3    1.93    1.52
   1   8   3    4.97    1.47
  -1  -8  -3    5.05    1.97
  -1   8   3    0.75    0.79
  -1   8   3    1.30    0.96
   1  -9  -3   12.58    3.63
  -1  -9  -3    7.43    2.61
   1 -10  -3    0.90    2.06
  -1 -10  -3    1.35    1.80
   2 -10   3    1.20    2.27
  -2 -10   3    0.28    1.35
   2   9  -3    3.73    2.19
   2  -9   3    8.65    3.46
  -2   9  -3   14.83    3.97
   2   8  -3    5.16    2.35
   2  -8   3    8.87    3.06
  -2  -8   3    4.75    2.13
  -2   8  -3    9.06    2.92
  -2  -8   3    2.37    1.25
   2   7  -3    5.31    2.08
   2  -7   3    2.48    1.79
  -2  -7   3    8.39    1.77
  -2  -7   3    5.31    1.94
  -2  -7   3    7.13    1.05
  -2   7  -3    2.31    1.73
   2  -6   3   15.46    3.30
   2  -3   3   34.65    3.36
   2  -3   3   37.58    2.19
   2  -3   3   37.03    2.03
   2  -3   3   37.50    2.50
  -2   3  -3   36.30    3.34
  -2   3  -3   31.51    2.36
  -2   3  -3   32.87    2.96
   2  -2   3   39.57    2.08
   2   2  -3   40.94    3.57
   2  -2   3   38.17    3.33
   2  -2   3   39.22    2.47
   2   2  -3   39.74    2.38
   2  -2   3   39.97    2.65
   2   2  -3   43.79    2.53
   2  -2   3   40.30    2.22
  -2  -2   3   42.63    2.39
  -2  -2   3   40.49    2.71
  -2   2  -3   42.44    3.41
  -2   2  -3   36.58    2.43
  -2   2  -3   38.90    2.98
  -2  -2   3   38.96    2.85
   2   0   3    0.16    0.49
   2   0  -3    0.06    0.23
   2   0  -3    0.48    0.60
   2   0   3    0.04    0.09
   2   0   3   -0.04    0.09
   2   0  -3    0.06    0.17
   2   0   3    0.07    0.18
  -2   0   3    0.10    0.31
  -2   0  -3   -0.03    0.16
  -2   0   3    0.00    0.13
  -2   0  -3    0.04    0.25
  -2   0  -3   -0.03    0.19
  -2   0   3    0.01    0.20
  -2   0   3    0.07    0.24
  -2   0  -3   -0.30    0.41
   2  -2  -3   41.25    2.59
   2  -2  -3   41.75    3.23
   2   2   3   39.70    2.45
  -2   2   3   41.22    2.72
  -2  -2  -3   41.04    1.99
  -2  -2  -3   43.04    2.64
  -2   2   3   40.55    2.57
  -2   2   3   43.57    2.38
  -2   2   3   42.74    2.57
  -2   2   3   42.59    1.99
   2  -5  -3   42.03    4.12
  -2   5   3   46.12    3.32
  -2   5   3   45.44    3.75
   2  -7  -3    6.58    2.20
   2   7   3    3.03    1.01
  -2  -7  -3    2.93    1.40
  -2   7   3    6.30    1.47
   2  -8  -3    3.65    2.17
   2   8   3   11.28    2.79
  -2  -8  -3   10.90    2.71
  -2   8   3    3.59    1.35
  -2   8   3    2.53    1.21
   2  -9  -3    0.32    1.59
  -2  -9  -3    8.13    2.67
   2 -10  -3    0.48    1.89
  -2 -10  -3   -0.23    1.29
   3 -10   3    6.98    3.73
   3   9  -3    0.20    1.40
   3  -9   3    5.13    2.84
   3   9  -3   -0.16    1.01
  -3  -9   3    1.54    1.58
  -3  -9   3    0.37    1.04
  -3   9  -3    6.99    2.98
   3  -8   3   25.97    5.43
   3  -7   3    0.51    1.46
   3   7  -3    1.69    1.09
  -3  -7   3    0.84    1.07
  -3  -7   3   -0.23    0.74
  -3   7  -3   -0.13    1.06
  -3  -7   3    0.82    0.48
   3   6  -3   39.67    4.30
   3  -6   3   25.99    4.15
   3   6  -3   39.42    3.27
  -3  -6   3   36.34    2.33
  -3   6  -3   23.18    3.70
  -3  -6   3   37.64    3.95
  -3  -6   3   33.87    2.91
   3   5  -3   27.12    2.36
   3   5  -3   32.34    3.78
   3  -5   3   26.33    3.75
   3   5  -3   35.46    2.83
  -3   5  -3   25.01    3.11
  -3  -5   3   34.97    2.12
  -3  -5   3   33.91    2.62
  -3   5  -3   25.59    3.44
  -3  -5   3   32.14    3.32
   3   3  -3   17.08    2.50
   3  -2   3  161.71    9.27
   3   2  -3  119.74    6.68
   3  -2   3  164.85    7.56
   3  -2   3  159.66    6.48
   3  -2   3  161.61    6.81
   3   2  -3  126.66    7.34
  -3   2  -3  153.47    8.40
  -3   2  -3  157.38    7.62
  -3  -2   3  123.43    8.06
  -3  -2   3  123.65    6.47
  -3  -2   3  116.91    7.72
  -3   2  -3  153.52    9.29
   3   0  -3    0.00    0.13
   3   0  -3   -0.04    0.14
   3   0   3    0.04    0.25
   3   0   3   -0.10    0.14
   3   0   3   -0.37    0.51
   3   0   3   -0.04    0.16
   3   0  -3    0.26    0.72
  -3   0  -3   -0.11    0.17
  -3   0   3   -0.06    0.15
  -3   0   3   -0.01    0.28
  -3   0  -3   -0.02    0.59
  -3   0  -3   -0.01    0.29
  -3   0   3    0.04    0.35
  -3   0   3    0.07    0.27
   3   2   3  168.38    6.16
   3   2   3  164.62    8.14
   3  -2  -3  129.92    8.64
   3  -2  -3  120.04    6.72
   3   2   3  158.06    7.47
   3  -2  -3  128.78    8.65
  -3   2   3  126.26    7.46
  -3   2   3  128.04    8.19
  -3   2   3  121.60    7.57
  -3   2   3  125.26    7.09
  -3  -2  -3  157.72    5.87
   3  -3  -3   21.63    1.94
   3  -3  -3   20.68    2.55
  -3   3   3   18.15    1.73
  -3   3   3   20.02    1.49
  -3   3   3   20.30    1.25
  -3   3   3   19.42    1.90
  -3   3   3   17.36    1.62
   3   5   3   28.22    2.39
   3  -5  -3   35.79    3.90
  -3   5   3   37.39    3.23
  -3  -5  -3   29.53    2.26
  -3   5   3   35.43    2.81
  -3  -5  -3   26.01    2.75
   3  -6  -3   35.45    4.25
   3   6   3   25.86    2.40
  -3   6   3   34.29    3.35
  -3  -6  -3   23.11    2.20
  -3  -6  -3   22.29    2.84
   3  -7  -3    0.13    1.15
   3   7   3    0.76    0.68
  -3   7   3    0.37    0.68
  -3  -7  -3    0.42    0.88
   3  -9  -3   -0.10    1.62
  -3  -9  -3    5.00    2.20
   3 -10  -3    0.08    2.02
  -3 -10  -3    3.62    2.41
   4  -9   3    0.00    2.08
   4   9  -3    2.35    1.59
   4   9  -3    4.29    2.48
  -4   9  -3    0.24    1.79
  -4  -9   3    2.53    1.52
  -4  -9   3    4.21    2.33
   4   7  -3   -0.21    0.80
   4  -7   3    0.18    1.55
  -4  -7   3   -0.66    0.79
  -4  -7   3   -0.20    0.34
  -4   7  -3    0.75    1.32
  -4  -7   3    0.17    0.86
   4  -6   3   14.58    3.65
   4   6  -3   17.02    2.62
   4   6  -3    9.50    2.72
  -4   6  -3   16.64    2.58
  -4  -6   3   15.59    2.28
  -4  -6   3   13.50    1.34
  -4  -6   3   12.30    2.69
  -4   6  -3   18.29    3.62
   4   5  -3    4.89    1.33
   4  -5   3    9.43    2.82
   4   5  -3    4.62    1.89
  -4   5  -3    8.35    2.00
  -4  -5   3    3.90    1.09
  -4  -5   3    3.37    1.33
  -4  -5   3    4.20    0.82
  -4   5  -3   10.83    2.54
   4  -4   3   20.05    1.49
   4  -4   3   17.24    1.80
   4  -4   3   17.29    3.41
  -4   4  -3   15.16    1.76
  -4   4  -3   21.66    2.96
  -4   4  -3   20.62    2.47
   4  -3   3   25.99    3.29
   4  -2   3   16.76    2.46
  -4   2  -3   17.87    2.56
  -4   2  -3   20.23    2.13
  -4   2  -3   20.73    1.72
   4  -1   3    2.77    1.19
   4   1  -3    4.06    0.91
   4   1  -3    4.12    1.48
   4   1  -3    3.22    0.58
  -4  -1   3    3.50    0.88
  -4   1  -3    1.95    1.11
  -4  -1   3    4.10    0.85
  -4  -1   3    3.76    0.93
   4   0  -3   -0.10    0.36
   4   0  -3   -0.37    0.66
   4   0   3   -0.11    0.20
   4   0  -3   -0.04    0.19
   4   0   3   -0.11    0.65
   4   0   3   -0.11    0.26
   4   0   3    0.12    0.27
   4   0  -3   -0.17    0.12
  -4   0   3   -0.13    0.33
  -4   0   3   -0.25    0.32
  -4   0  -3    0.17    0.41
  -4   0   3   -0.09    0.17
  -4   0   3   -0.37    0.27
  -4   0  -3   -0.24    0.16
  -4   0  -3    0.47    0.71
   4   1   3    1.22    0.37
   4   1   3    1.60    0.40
   4  -1  -3    2.54    0.72
   4   1   3    1.33    0.55
   4   1   3    1.60    0.90
   4  -1  -3    3.38    1.39
  -4   1   3    3.17    0.82
  -4  -1  -3    1.78    1.03
  -4   1   3    3.81    0.81
  -4  -1  -3    1.37    0.37
  -4  -1  -3    1.70    0.42
  -4   1   3    4.18    1.16
  -4  -1  -3    1.21    0.54
   4   2   3   22.12    1.50
   4   2   3   22.31    1.70
   4   2   3   21.02    2.43
   4   2   3   20.14    1.95
   4  -2  -3   33.56    3.37
  -4   2   3   29.73    1.77
  -4   2   3   31.37    2.21
  -4   2   3   29.91    2.58
  -4  -2  -3   21.64    2.03
  -4  -2  -3   21.05    1.42
  -4   2   3   30.75    2.30
   4   4   3   21.33    1.75
   4   4   3   18.62    1.68
  -4  -4  -3   20.66    1.57
  -4  -4  -3   19.32    2.14
   4   5   3   11.02    1.61
   4   5   3   12.09    1.37
   4  -5  -3    4.86    2.11
  -4  -5  -3   10.43    1.91
  -4  -5  -3   10.03    1.43
   4  -6  -3   14.14    3.62
   4   6   3   16.31    1.80
   4   6   3   18.83    1.96
  -4   6   3   12.76    1.97
  -4  -6  -3   16.88    2.37
  -4  -6  -3   17.11    1.84
  -4   6   3   14.50    2.41
   4   7   3    0.39    0.53
   4   7   3    0.68    0.79
   4  -7  -3    0.25    1.36
  -4   7   3    0.24    0.70
  -4  -7  -3    0.73    1.02
   4   8   3   41.50    3.62
  -4  -8  -3   40.11    4.70
   4  -9  -3    2.38    2.46
  -4  -9  -3   -0.43    0.97
   5  -9   3   10.72    4.34
   5   9  -3    1.31    1.54
   5   9  -3    1.40    1.97
  -5  -9   3    4.06    1.84
  -5  -9   3    0.18    1.35
  -5   9  -3   10.33    3.67
   5   8  -3    2.33    1.45
   5  -8   3    7.73    3.62
  -5   8  -3    6.47    2.85
  -5  -8   3    0.34    1.27
  -5  -8   3    0.92    1.17
   5  -7   3    4.82    2.71
   5   7  -3    0.53    1.01
  -5  -7   3   -0.18    0.38
  -5  -7   3   -0.36    0.80
  -5  -7   3    0.34    1.13
  -5   7  -3    4.42    2.21
   5  -6   3   21.83    4.81
   5   6  -3   17.38    2.69
  -5  -6   3   19.68    3.04
  -5  -6   3   20.35    2.39
  -5   6  -3   27.35    3.46
  -5  -6   3   19.31    1.65
  -5   6  -3   22.85    3.70
   5  -5   3   19.27    4.28
   5   5  -3   28.20    2.65
   5   5  -3   25.86    3.80
  -5   5  -3   16.59    3.57
  -5  -5   3   26.85    2.43
  -5  -5   3   25.30    3.03
  -5   5  -3   19.50    2.88
  -5  -5   3   25.64    1.88
   5   4  -3   25.73    2.12
   5   4  -3   24.70    2.34
   5   4  -3   25.69    3.57
  -5  -4   3   24.27    1.78
  -5  -4   3   22.64    2.18
  -5  -4   3   24.38    2.77
   5   1  -3   27.93    3.59
   5   1  -3   27.69    1.91
   5   1  -3   26.01    2.18
   5   1  -3   26.90    1.57
  -5  -1   3   27.13    2.37
  -5  -1   3   25.02    2.07
  -5  -1   3   25.34    2.40
   5   0   3   -0.42    0.69
   5   0  -3   -0.07    0.09
   5   0   3   -0.10    0.21
   5   0  -3    0.16    0.42
   5   0   3   -0.03    0.28
   5   0  -3   -0.34    0.74
   5   0   3    0.05    0.35
   5   0  -3    0.04    0.22
  -5   0   3    0.01    0.42
  -5   0  -3   -0.08    0.17
  -5   0   3   -0.28    0.31
  -5   0  -3   -0.55    0.58
  -5   0  -3   -0.08    0.39
  -5   0   3    0.31    0.42
   5   1   3   13.03    1.09
   5   1   3   10.94    2.25
   5   1   3   11.08    1.08
   5   1   3   10.95    1.43
  -5  -1  -3   13.10    2.68
  -5  -1  -3   12.56    1.06
  -5  -1  -3   11.89    0.97
  -5  -1  -3   11.56    1.48
   5  -4  -3   28.03    3.99
   5  -4  -3   27.86    3.92
   5   5   3   15.19    1.69
   5   5   3   16.22    1.71
   5  -5  -3   25.58    3.91
  -5  -5  -3   16.24    1.62
  -5  -5  -3   15.11    2.13
   5  -6  -3   20.59    4.57
   5   6   3   24.44    2.34
   5   6   3   23.06    2.34
  -5   6   3   23.52    2.73
  -5  -6  -3   24.15    2.99
  -5  -6  -3   23.54    2.20
   5  -7  -3    1.16    1.72
   5   7   3    3.82    1.14
  -5  -7  -3    2.11    1.07
  -5  -7  -3    3.34    1.57
  -5   7   3   -0.10    0.80
   5  -8  -3    1.43    2.02
  -5  -8  -3    6.35    2.24
   5  -9  -3    1.76    2.28
  -5  -9  -3   12.03    3.23
   6  -9   3    6.63    3.88
   6  -9   3    7.75    4.21
   6  -8   3    4.29    3.30
   6   8  -3   11.31    2.49
  -6  -8   3   13.70    3.48
  -6  -8   3   14.51    2.71
   6  -7   3    1.30    2.14
   6   7  -3   -0.24    0.81
   6  -7   3    5.54    3.29
  -6  -7   3    0.78    0.94
  -6  -7   3   -0.49    0.87
  -6   7  -3    2.44    2.02
   6  -6   3    0.22    1.72
   6  -6   3    1.20    1.94
   6   6  -3    8.26    1.92
  -6  -6   3    8.61    2.47
  -6  -6   3    8.80    1.91
  -6  -6   3    7.78    1.02
   6   5  -3   17.48    2.22
   6  -5   3   12.17    3.60
   6   5  -3   17.13    3.87
   6  -5   3   13.94    3.79
  -6  -5   3   19.76    2.22
  -6   5  -3   16.41    2.97
  -6  -5   3   17.16    2.66
  -6   5  -3   11.38    3.27
  -6  -5   3   15.95    1.47
   6   4  -3    0.66    1.27
   6   4  -3    1.07    0.84
   6  -4   3    0.17    1.19
  -6   4  -3    0.43    1.20
  -6  -4   3    1.52    0.98
  -6  -4   3    1.77    0.83
  -6   4  -3    0.59    0.77
   6  -3   3    5.13    2.12
   6   3  -3    6.39    1.37
   6   3  -3   10.20    2.83
  -6  -3   3    6.86    1.70
  -6   3  -3    4.87    1.91
  -6  -3   3    6.56    1.27
  -6   3  -3    3.00    1.13
   6   2  -3   51.16    3.54
   6   2  -3   55.74    5.59
   6   2  -3   49.08    3.23
  -6  -2   3   51.82    3.38
  -6  -2   3   45.42    3.82
  -6  -2   3   52.30    4.04
   6  -1   3   26.66    2.15
   6  -1   3   27.29    2.05
   6  -1   3   26.48    3.53
  -6   1  -3   27.43    2.66
  -6   1  -3   27.95    3.73
  -6   1  -3   26.99    1.77
   6   0  -3   -0.58    0.43
   6   0   3   -0.19    0.95
   6   0   3    0.00    0.37
   6   0  -3    0.00    0.26
   6   0   3    0.04    0.28
   6   0  -3    0.50    1.02
  -6   0  -3    0.13    0.17
  -6   0  -3   -0.16    0.37
  -6   0   3    0.27    0.53
  -6   0  -3    0.28    1.00
  -6   0  -3    0.31    0.55
  -6   0   3    0.00    0.44
  -6   0   3   -0.20    0.46
   6   1   3   27.77    1.95
   6   1   3   26.00    3.33
   6   1   3   27.65    2.08
  -6  -1  -3   27.28    1.87
  -6  -1  -3   28.43    3.85
  -6  -1  -3   28.59    2.66
   6  -2  -3   49.87    5.41
   6  -2  -3   50.09    2.57
   6  -2  -3   50.53    3.70
  -6   2   3   46.97    3.77
  -6   2   3   50.52    3.76
  -6   2   3   45.73    4.45
   6   3   3    4.67    0.91
   6  -3  -3   10.36    3.02
   6  -3  -3    6.40    1.54
   6  -3  -3    7.12    0.69
   6   3   3    7.17    1.04
  -6   3   3    6.75    1.87
  -6   3   3    6.28    1.43
  -6  -3  -3    4.29    0.85
  -6  -3  -3    4.83    1.26
  -6   3   3    8.33    1.58
   6   4   3    1.36    0.65
   6  -4  -3   -0.09    1.21
   6   4   3    0.82    0.53
  -6  -4  -3    0.68    0.50
  -6   4   3    2.22    1.33
  -6  -4  -3   -0.24    0.56
  -6   4   3    1.92    0.90
   6  -5  -3   15.47    4.08
   6  -5  -3   19.04    4.35
   6   5   3   14.35    1.73
  -6   5   3   19.90    2.36
  -6  -5  -3   13.36    1.53
  -6  -5  -3   12.64    2.44
  -6   5   3   17.67    2.82
   6  -6  -3    8.24    3.27
   6  -6  -3    6.93    2.92
  -6   6   3    7.39    1.79
   6  -7  -3    1.08    1.70
   6   7   3    4.24    1.20
   6  -7  -3    0.96    2.04
  -6  -7  -3    1.96    1.37
   6  -8  -3   16.18    4.87
   6  -8  -3   11.71    4.21
   6  -9  -3   -0.77    2.19
   6  -9  -3   -0.20    2.19
  -6  -9  -3    8.68    2.91
  -7  -9   3   -0.54    1.33
  -7  -9   3    0.02    1.65
   7   8  -3    4.82    1.91
   7  -8   3   -0.36    2.22
   7  -8   3    1.47    2.68
  -7  -8   3   10.40    2.37
  -7  -8   3    7.64    2.76
  -7   8  -3    0.97    2.16
   7   7  -3    8.06    2.15
   7  -7   3    1.16    2.48
  -7  -7   3    9.43    2.14
  -7  -7   3    7.13    2.49
   7   6  -3    2.85    1.47
   7  -6   3   18.64    4.91
  -7   6  -3   11.12    3.41
  -7  -6   3    3.10    1.67
  -7  -6   3    5.08    1.57
  -7  -6   3    2.57    0.69
   7   5  -3   22.95    2.79
   7   5  -3   28.04    5.56
   7  -5   3   13.18    4.04
  -7  -5   3   28.60    2.01
  -7  -5   3   25.06    2.68
  -7  -5   3   25.12    3.32
   7   4  -3    0.18    0.72
   7   4  -3   -0.04    1.24
   7  -4   3    1.54    1.83
  -7  -4   3    1.60    0.91
  -7   4  -3    0.76    0.92
  -7  -4   3    0.09    0.74
  -7   4  -3   -0.06    1.24
   7  -3   3    0.24    1.30
   7   3  -3    0.56    0.75
   7   3  -3   -0.32    1.17
  -7   3  -3    0.34    0.76
  -7   3  -3   -0.11    1.18
  -7  -3   3    0.17    0.71
  -7   3  -3    0.04    0.37
  -7  -3   3   -0.19    0.61
   7   2  -3    6.50    1.47
   7   2  -3    7.59    2.72
   7  -2   3   10.31    2.87
   7  -2   3   11.15    1.39
  -7   2  -3   11.44    2.14
  -7  -2   3    7.50    1.49
  -7   2  -3   11.11    2.94
  -7  -2   3    7.74    1.76
   7   1  -3   15.26    3.54
   7   1  -3   14.37    2.12
  -7  -1   3   14.20    1.90
  -7  -1   3   16.18    1.85
  -7  -1   3   13.06    1.97
   7   0  -3    0.48    0.62
   7   0   3    0.08    1.15
   7   0   3   -0.25    0.44
   7   0   3   -0.14    0.30
   7   0  -3    0.37    1.30
  -7   0  -3    0.14    0.58
  -7   0   3    0.21    0.59
  -7   0   3    0.07    0.63
  -7   0  -3    0.18    1.05
  -7   0  -3   -0.02    0.47
  -7   0   3    0.08    0.57
   7  -1  -3   18.04    2.15
   7  -1  -3   13.22    3.39
  -7   1   3   15.60    1.87
  -7   1   3   15.37    2.12
  -7   1   3   15.08    3.16
  -7   1   3   19.04    2.18
   7   2   3   11.10    1.31
   7   2   3   10.40    1.27
   7  -2  -3    8.07    0.86
   7  -2  -3    8.51    1.86
   7  -2  -3    8.56    2.95
  -7  -2  -3   10.05    1.86
  -7   2   3    8.32    2.30
  -7   2   3    8.05    1.69
  -7  -2  -3   10.80    1.25
  -7   2   3    8.60    1.81
   7  -3  -3    0.32    0.28
   7  -3  -3   -0.10    1.28
   7   3   3    0.28    0.41
   7   3   3   -0.11    0.43
   7  -3  -3    0.13    0.72
  -7   3   3   -0.01    0.80
  -7  -3  -3    0.00    0.42
  -7   3   3    0.27    0.68
  -7  -3  -3    0.49    0.72
   7  -4  -3    0.85    1.66
   7   4   3    0.54    0.52
  -7   4   3    0.57    1.04
  -7  -4  -3    0.34    0.73
  -7  -4  -3    0.71    0.55
  -7   4   3    0.39    0.73
   7  -5  -3   33.82    6.23
  -7   5   3   26.78    3.08
  -7   5   3   27.48    3.93
   7   6   3   14.95    2.00
  -7  -6  -3   13.71    2.84
   7  -7  -3    7.02    3.39
   7  -8  -3    8.60    3.93
   7  -9  -3   -0.64    2.30
   8   8  -3    0.37    1.40
  -8  -8   3    0.72    1.59
  -8  -8   3   -0.13    1.16
   8  -7   3    0.78    2.63
   8   7  -3    8.05    2.15
  -8  -7   3    7.04    1.90
  -8   7  -3    2.93    2.47
  -8  -7   3    6.50    2.47
   8  -6   3    1.14    2.42
   8   6  -3    4.03    1.56
  -8  -6   3    4.10    0.86
  -8   6  -3    0.27    1.85
  -8  -6   3    2.65    1.28
  -8  -6   3    4.01    1.88
   8   5  -3    7.70    1.91
   8  -5   3   13.49    4.29
  -8  -5   3    9.21    1.21
  -8  -5   3    8.88    1.96
  -8   5  -3   13.44    2.85
  -8  -5   3    7.94    2.26
  -8   5  -3   10.81    3.53
   8  -4   3   26.08    5.51
  -8   4  -3   22.39    4.72
   8   3  -3   12.46    2.21
   8   3  -3   10.48    3.52
  -8  -3   3   13.55    2.19
  -8  -3   3   12.65    2.56
   8  -2   3    7.28    2.82
  -8   2  -3    9.99    2.20
  -8   2  -3   10.42    3.14
   8  -1   3   13.55    1.62
   8  -1   3   12.76    1.94
   8   1  -3   19.02    2.30
   8   1  -3   17.97    4.07
   8  -1   3   12.85    3.47
  -8  -1   3   18.01    2.07
  -8   1  -3   12.12    3.35
  -8  -1   3   16.13    2.17
  -8   1  -3   15.32    2.28
   8   0  -3    1.95    1.79
   8   0   3   -0.11    0.35
   8   0   3   -0.11    0.53
   8   0  -3    0.30    0.70
  -8   0   3   -0.32    0.55
  -8   0  -3    0.02    1.20
  -8   0  -3    0.18    0.59
  -8   0   3    0.31    0.69
  -8   0  -3    0.36    0.70
   8  -1  -3   16.07    2.50
   8   1   3   13.43    1.61
   8   1   3   14.49    1.63
   8  -1  -3   15.44    3.94
  -8   1   3   16.26    2.12
  -8   1   3   15.83    2.31
  -8  -1  -3   15.23    1.64
  -8  -1  -3   12.80    2.04
  -8   1   3   17.94    2.47
  -8  -1  -3   11.12    3.37
   8  -2  -3    1.53    0.52
   8  -2  -3    1.85    2.02
   8  -2  -3    2.37    1.22
  -8   2   3    1.31    1.02
  -8   2   3    0.88    1.17
  -8   2   3    2.06    1.06
   8  -3  -3   11.75    1.06
   8  -3  -3   11.86    2.39
   8  -3  -3   10.12    3.48
  -8   3   3    9.97    2.76
   8   5   3   14.01    1.85
   8  -5  -3    9.09    3.81
  -8  -5  -3   13.04    2.74
   8  -6  -3    4.49    3.03
  -8  -6  -3    1.71    1.41
   8  -7  -3    8.77    4.01
   8  -8  -3   -0.22    2.57
  -8  -8  -3    0.70    1.60
   9   7  -3    0.41    1.33
  -9   7  -3    1.19    2.36
  -9  -7   3    0.74    1.49
  -9  -7   3    1.43    1.23
   9   6  -3    9.37    2.29
  -9  -6   3   13.86    2.52
  -9  -6   3   14.27    3.36
   9   5  -3   15.44    2.78
  -9  -5   3   14.32    3.16
  -9  -5   3   15.92    1.58
  -9   5  -3   28.22    5.98
  -9  -5   3   18.60    2.83
   9   4  -3    1.63    1.13
  -9  -4   3    2.90    1.44
  -9   4  -3    0.14    1.50
  -9   4  -3    0.86    1.08
  -9  -4   3    3.48    1.33
   9   3  -3    0.10    0.81
   9   3  -3    0.11    1.61
  -9   3  -3    2.63    2.18
  -9   3  -3    1.49    1.17
  -9  -3   3    0.02    0.82
  -9  -3   3    0.47    0.82
   9   2  -3    0.28    1.58
  -9   2  -3   11.11    2.54
  -9   2  -3   11.13    3.52
   9   0  -3   -0.29    0.71
   9   0  -3    0.80    1.66
  -9   0  -3    0.18    0.62
  -9   0   3    0.39    0.70
  -9   0  -3    0.52    1.66
  -9   0  -3    0.18    0.70
  -9   0   3    0.14    0.75
   9  -2  -3    0.13    1.71
  -9   2   3    0.53    0.81
   9  -3  -3    0.31    0.92
   9   3   3    2.67    0.92
   9  -3  -3    1.65    2.05
  -9   3   3   -0.18    1.22
  -9  -3  -3    2.23    1.22
   9  -4  -3    2.55    0.60
   9  -4  -3    1.90    2.41
  -9  -4  -3    1.85    1.24
  -9   4   3    2.32    1.87
   9  -5  -3   16.55    5.27
  -9  -5  -3   27.56    3.73
   9  -6  -3   10.70    4.47
   9  -7  -3   -0.44    2.25
  -9  -7  -3    0.71    1.50
 -10  -7   3    0.74    1.68
 -10  -7   3    0.24    1.22
  10   6  -3    5.55    2.00
 -10  -6   3    6.50    1.88
 -10   6  -3    1.39    2.41
 -10  -6   3    4.92    2.23
  10   5  -3    0.23    1.02
 -10  -5   3    0.03    1.13
 -10  -5   3   -0.16    0.99
 -10   5  -3    0.98    2.22
  10   4  -3    1.36    1.17
 -10   4  -3    0.06    0.93
 -10  -4   3    1.98    0.74
 -10  -4   3    2.15    1.31
 -10  -4   3    3.11    1.64
 -10   4  -3   -0.89    1.62
  10   3  -3    1.49    1.16
 -10   3  -3    4.10    2.65
 -10  -3   3    0.81    1.02
 -10   3  -3    3.50    1.71
 -10  -3   3    0.53    1.07
  10   2  -3    7.89    3.46
  10   2  -3    9.94    2.28
 -10  -2   3   10.59    2.14
 -10   2  -3   13.48    2.79
 -10   2  -3   12.42    2.15
 -10   2  -3   11.34    3.92
 -10  -2   3    9.73    2.37
  10   1  -3   27.62    5.86
  10   1  -3   25.95    3.10
 -10  -1   3   26.49    3.24
 -10  -1   3   31.41    3.13
  10   0  -3   -0.04    0.78
  10   0  -3    0.46    1.89
 -10   0   3    0.44    0.88
 -10   0  -3   -0.60    1.45
 -10   0  -3   -0.29    0.69
 -10   0   3    0.47    0.92
 -10   0  -3   -0.05    0.74
  10  -1  -3   27.24    3.35
  10  -1  -3   31.57    6.53
 -10   1   3   34.71    3.39
  10  -2  -3   10.59    4.03
  10  -2  -3    9.23    2.24
  10  -2  -3   10.09    1.15
 -10  -2  -3    8.85    2.25
 -10   2   3   10.50    2.27
  10  -3  -3    1.21    0.54
  10  -3  -3    1.36    1.32
  10  -3  -3   -1.56    1.79
 -10   3   3    2.08    2.13
 -10  -3  -3    2.57    1.33
  10  -4  -3    3.15    2.83
 -10  -4  -3    0.67    1.18
  10  -5  -3    1.46    2.53
 -10  -5  -3   -0.64    0.86
  10  -6  -3    7.12    4.29
  10  -7  -3    0.13    2.90
 -10  -7  -3    1.61    1.88
 -11  -6   3   -0.22    1.58
 -11  -6   3    1.56    1.41
 -11  -5   3    0.80    1.24
 -11  -5   3    1.47    1.37
 -11   5  -3    0.02    2.18
  11   4  -3    5.53    1.97
 -11   4  -3    8.80    3.88
 -11  -4   3    9.08    2.62
 -11  -4   3    8.19    1.27
 -11  -4   3    7.22    1.88
  11   3  -3    2.19    1.47
 -11   3  -3    0.60    1.26
 -11   3  -3   -0.71    1.86
 -11  -3   3    1.08    1.39
 -11  -3   3    2.39    1.47
  11   2  -3   14.68    2.83
 -11  -2   3   11.22    2.72
 -11   2  -3   13.20    3.02
 -11  -2   3   17.04    2.79
 -11   2  -3   14.60    4.77
 -11   2  -3   16.25    2.63
  11   1  -3   -0.70    0.85
  11   1  -3    0.44    1.97
 -11   1  -3    1.14    1.37
 -11   1  -3    2.25    2.60
 -11  -1   3   -0.14    0.90
  11   0  -3    0.50    1.05
  11   0  -3   -1.42    1.98
 -11   0  -3    0.29    1.03
 -11   0   3    0.37    0.99
 -11   0  -3    0.60    1.96
  11  -1  -3    0.70    2.11
  11  -1  -3    0.65    1.23
 -11   1   3    0.05    0.95
 -11  -1  -3    2.31    1.56
  11  -2  -3   13.15    2.81
  11  -2  -3   16.92    5.29
 -11  -2  -3   13.18    2.89
 -11   2   3   18.51    3.17
  11  -3  -3    2.25    2.83
  11  -3  -3    2.06    1.57
 -11   3   3    2.04    1.49
 -11  -3  -3    0.41    1.10
  11  -4  -3    7.17    3.98
 -11  -4  -3    8.79    2.54
  11  -5  -3    1.61    2.90
 -11  -5  -3    0.40    1.35
  11  -6  -3    0.11    3.11
 -11  -6  -3    0.93    1.66
 -12  -5   3    0.05    1.39
 -12  -4   3    0.94    1.25
  12   3  -3   -0.12    1.14
 -12  -3   3    0.83    1.17
 -12   3  -3    0.02    1.47
 -12   3  -3    2.52    3.12
  12   2  -3   13.99    2.92
 -12   2  -3   20.09    5.67
 -12   2  -3   20.49    3.85
 -12  -2   3   14.71    2.77
  12   1  -3    0.23    1.12
 -12   1  -3    2.89    2.90
 -12  -1   3    0.39    1.19
 -12   1  -3    1.17    1.49
  12   0  -3    1.03    1.28
  12   0  -3   -0.44    2.39
 -12   0  -3    0.83    1.12
 -12   0   3   -0.26    1.04
  12  -1  -3    0.93    2.51
  12  -1  -3    1.25    1.28
 -12  -1  -3    1.11    1.43
 -12   1   3    0.54    1.21
  12  -2  -3   10.92    2.75
  12  -2  -3   14.98    5.50
 -12  -2  -3   17.15    3.41
 -12   2   3   15.99    3.10
  12  -3  -3    0.58    1.42
  12  -3  -3    0.40    2.70
 -12  -3  -3    0.02    1.00
 -12   3   3    0.39    1.39
  12  -4  -3    1.72    3.23
 -12  -4  -3    1.24    1.46
 -12   4   3    2.50    1.75
  12  -5  -3    0.33    3.69
 -12   5   3    3.65    1.81
 -13  -3   3    2.60    1.60
 -13   2  -3   -0.47    1.41
 -13  -2   3    1.21    1.44
  13   1  -3    0.84    1.46
 -13  -1   3    1.78    1.56
 -13   1  -3    2.08    1.71
  13   0  -3   -0.30    1.30
 -13   0  -3    0.32    1.37
 -13   0   3   -0.29    1.24
  13  -1  -3    1.26    1.47
 -13   1   3    3.20    1.73
 -13  -1  -3    4.86    2.07
  13  -2  -3    0.80    1.56
 -13   2   3    3.62    1.85
 -13  -2  -3    0.27    1.25
  13  -3  -3    0.88    3.80
 -13   3   3    0.67    1.72
 -13  -3  -3    0.79    1.41
   0 -10   4    4.06    2.77
   0   9  -4   -0.60    1.31
   0  -9   4   -0.98    1.20
   0  -8   4    0.91    1.39
   0   8  -4   -0.15    1.24
   0  -7   4    5.63    2.25
   0   7  -4    5.17    1.95
   0  -7   4    4.20    0.94
   0   7  -4    4.69    2.09
   0  -7   4    4.08    1.34
   0   6  -4   -0.19    0.81
   0  -6   4    0.27    0.42
   0  -6   4    0.38    0.79
   0   6  -4    0.07    0.91
   0  -6   4    0.55    0.71
   0  -5   4    4.98    1.70
   0   5  -4    4.41    0.77
   0  -5   4    4.42    0.83
   0   5  -4    4.09    1.44
   0   5  -4    4.22    0.97
   0  -5   4    4.55    1.16
   0   5  -4    3.75    1.56
   0   4  -4   17.28    1.26
   0  -4   4   17.98    1.66
   0  -4   4   16.87    2.28
   0  -4   4   16.80    1.74
   0   4  -4   15.32    2.23
   0   4  -4   16.56    2.29
   0  -4   4   14.53    1.28
   0   3  -4   10.17    0.86
   0   3  -4   11.02    1.70
   0  -3   4   11.00    0.96
   0  -3   4   10.86    1.63
   0   3  -4   11.37    1.11
   0  -3   4   11.88    1.25
   0   3  -4   11.22    1.71
   0  -3   4   10.66    1.12
   0  -2   4   13.32    1.14
   0  -2   4   13.39    0.92
   0   2  -4   12.32    1.01
   0  -2   4   12.42    1.13
   0  -2   4   13.11    1.13
   0   2  -4   13.34    1.65
   0  -2   4   12.59    1.50
   0   2  -4   12.34    1.68
   0   2  -4   13.81    0.85
   0   1  -4   29.98    1.72
   0  -1   4   29.96    1.75
   0   1  -4   29.22    2.37
   0  -1   4   29.72    2.14
   0  -1   4   30.39    1.66
   0   1  -4   28.58    2.34
   0  -1   4   28.20    1.44
   0   0  -4    8.61    0.97
   0   0  -4    9.14    0.81
   0   0   4    8.44    0.67
   0   0  -4    9.01    0.75
   0   0  -4    9.34    0.96
   0  -1  -4   30.07    1.91
   0  -1  -4   29.58    1.99
   0   1   4   28.91    1.87
   0  -1  -4   30.17    1.65
   0  -2  -4   13.48    0.93
   0  -2  -4   13.39    1.17
   0  -2  -4   13.09    0.96
   0   3   4   10.80    0.88
   0   3   4   10.23    0.86
   0  -3  -4   10.84    1.11
   0  -3  -4   11.50    1.22
   0   4   4   17.98    1.48
   0  -4  -4   15.64    1.74
   0   4   4   17.30    1.45
   0   5   4    4.29    0.94
   0   5   4    4.75    0.98
   0   5   4    4.96    1.25
   0  -5  -4    3.99    1.18
   0   6   4    0.16    0.57
   0  -6  -4    1.03    0.89
   0   6   4    0.20    0.45
   0  -7  -4    4.81    1.78
   0   7   4    4.82    1.35
   0   7   4    5.03    1.32
   0  -8  -4   -0.04    0.91
   0   8   4   -0.01    0.57
   0  -9  -4   -0.62    1.26
   0   9   4    0.65    0.87
   0 -10  -4    3.15    2.25
   1 -10   4    7.38    3.54
   1   9  -4    0.15    1.35
   1  -9   4   -0.38    1.48
  -1   9  -4   -0.68    1.30
  -1  -9   4   -0.34    1.38
   1  -8   4   19.28    4.43
  -1   8  -4   16.48    3.89
   1   7  -4   20.08    3.93
   1   7  -4   18.45    3.54
  -1  -7   4   19.40    1.74
  -1  -7   4   19.62    3.95
  -1  -7   4   20.26    2.89
   1   6  -4   19.76    2.98
   1   6  -4   12.13    2.68
  -1  -6   4   14.12    2.14
  -1  -6   4   16.55    1.54
  -1  -6   4   13.47    2.85
   1   5  -4    0.72    0.92
   1   5  -4    0.87    0.42
   1   5  -4    0.53    0.86
   1   5  -4    0.81    0.55
   1  -5   4    1.39    0.58
   1  -5   4    0.90    0.64
   1  -5   4    1.00    0.98
  -1   5  -4    1.18    1.07
  -1   5  -4    1.49    0.50
  -1  -5   4    0.77    0.43
  -1  -5   4    0.60    0.64
  -1  -5   4    1.20    0.96
  -1   5  -4    3.00    1.37
   1  -5  -4    1.01    0.78
   1   5   4    2.12    0.70
   1   5   4    1.63    0.61
  -1  -5  -4    1.80    0.80
  -1   5   4    0.79    0.62
  -1   5   4    0.93    0.53
  -1   5   4    0.23    0.37
   1   6   4    6.40    1.26
   1   6   4    5.46    1.20
  -1  -6  -4    5.28    1.56
   1  -7  -4   14.06    3.07
  -1  -8  -4   16.56    3.43
   1   9   4    0.14    0.74
   1  -9  -4    0.56    1.44
  -1   9   4    0.06    0.79
  -1  -9  -4   -0.31    0.94
   1 -10  -4    0.36    1.88
  -1 -10  -4    7.67    3.03
   2 -10   4   23.92    6.07
   2  -9   4    0.24    1.62
   2   9  -4    4.43    1.86
   2   9  -4    3.59    2.19
  -2  -9   4    4.75    2.38
  -2   9  -4    0.72    1.66
   2   8  -4    2.54    1.72
   2  -8   4    0.95    1.74
  -2   8  -4    2.35    1.94
  -2  -8   4    1.03    1.10
  -2  -8   4    1.26    1.60
   2   7  -4    6.07    2.32
  -2  -7   4    8.14    1.25
  -2  -7   4    6.12    2.16
  -2  -7   4    5.72    1.70
   2  -2   4    7.34    0.83
   2  -1   4   50.30    2.68
   2  -1   4   51.74    3.55
   2  -1   4   48.06    2.83
   2   1  -4   41.42    3.65
   2   1  -4   45.96    2.72
   2   1  -4   45.41    2.22
   2  -1   4   51.26    2.40
   2  -1   4   47.38    3.53
  -2   1  -4   51.05    3.26
  -2  -1   4   39.86    2.51
  -2  -1   4   43.73    3.01
  -2  -1   4   43.92    2.64
  -2   1  -4   52.35    2.93
  -2   1  -4   51.56    3.78
   2   0  -4   38.91    3.21
   2   0  -4   41.68    2.39
  -2   0   4   39.70    2.48
  -2   0   4   41.29    2.30
  -2   0   4   40.80    2.21
   2  -1  -4   47.54    2.97
   2  -1  -4   39.70    2.72
   2  -1  -4   45.29    3.44
   2  -1  -4   46.09    2.78
   2   1   4   53.08    2.49
   2   1   4   51.42    2.54
  -2  -1  -4   52.60    3.86
  -2  -1  -4   56.00    3.46
  -2  -1  -4   49.34    2.87
  -2   1   4   44.94    2.55
  -2  -1  -4   52.60    2.92
   2  -3  -4  127.84    7.57
   2  -3  -4  122.67    6.25
  -2   3   4  123.91    6.59
  -2   3   4  114.93    6.98
  -2   3   4  124.67    6.36
   2  -7  -4    6.80    2.29
  -2   7   4    6.64    1.51
  -2  -7  -4    0.88    0.98
   2   8   4    1.91    1.01
   2  -8  -4    1.14    1.45
  -2  -8  -4    2.82    1.60
  -2   8   4    1.15    0.91
   2   9   4    1.35    1.03
   2  -9  -4    4.66    2.61
  -2  -9  -4    0.72    1.46
  -2 -10  -4   24.08    4.97
   3 -10   4    0.47    2.65
  -3 -10   4   -0.06    1.43
   3   9  -4    4.03    2.45
   3  -9   4    3.85    2.68
   3   9  -4    4.88    1.99
  -3   9  -4    3.11    2.37
  -3  -9   4    4.13    2.51
  -3  -9   4    1.63    1.59
   3  -8   4    1.26    2.07
   3   8  -4    0.69    1.56
   3   8  -4    1.79    1.29
  -3  -8   4    0.93    1.34
  -3  -8   4   -0.37    0.86
  -3   8  -4    1.49    1.70
  -3  -8   4    0.44    0.51
   3  -7   4   11.98    3.50
   3   7  -4   11.92    2.39
  -3   7  -4   11.69    2.76
  -3  -7   4   12.75    3.02
  -3  -7   4   13.31    1.45
  -3   7  -4   13.96    3.43
  -3  -7   4   13.13    2.36
   3  -6   4    5.89    2.40
   3   6  -4    5.76    2.11
   3   6  -4    3.67    1.28
  -3   6  -4    5.89    1.89
  -3  -6   4    3.39    0.79
  -3   6  -4    5.97    2.15
  -3  -6   4    4.28    1.68
  -3  -6   4    3.58    1.16
   3  -5   4   15.51    3.43
   3  -5   4   14.18    1.49
   3  -5   4   14.70    1.41
  -3   5  -4   15.21    3.08
  -3   5  -4   17.36    2.51
   3   4  -4   16.10    3.10
   3   4  -4   13.30    1.69
   3   4  -4   13.61    1.42
  -3  -4   4   15.70    1.32
  -3  -4   4   14.92    1.86
  -3  -4   4   15.18    2.06
  -3  -4   4   14.26    1.62
   3  -2   4   11.57    2.17
   3  -2   4    9.75    2.05
  -3   2  -4   10.48    1.75
  -3   2  -4    9.24    1.41
   3   0   4  110.84    5.59
   3   0   4  101.18    5.77
   3   0   4  118.77    5.02
   3   0   4  110.00    6.76
  -3   0  -4  105.67    5.80
  -3   0  -4  107.74    6.21
  -3   0  -4  105.43    7.31
   3  -4  -4   13.10    2.56
  -3   4   4   14.15    1.66
  -3   4   4   14.64    1.60
  -3   4   4   15.15    1.38
   3  -5  -4    4.44    1.68
  -3   5   4    4.16    1.20
  -3   5   4    3.25    0.98
   3   6   4    5.78    1.19
   3  -6  -4    4.08    1.84
  -3   6   4    3.19    1.08
  -3  -6  -4    5.68    1.58
   3   7   4   14.66    1.88
   3  -7  -4   16.68    3.72
  -3  -7  -4   11.90    2.59
  -3   7   4   13.71    2.12
   3  -8  -4   -0.34    1.29
   3   8   4    1.26    0.80
  -3  -8  -4    1.19    1.19
  -3   8   4    0.82    0.86
   3  -9  -4    4.94    2.78
  -3  -9  -4    2.38    1.66
   3 -10  -4   -0.64    1.80
   4  -9   4   11.97    4.47
   4   9  -4   -0.22    1.24
   4   9  -4    0.27    1.64
  -4  -9   4   -0.50    1.29
  -4   9  -4    9.13    3.54
  -4  -9   4    0.98    1.36
   4  -8   4    3.45    2.74
   4   8  -4    1.10    1.31
  -4   8  -4    3.04    2.24
  -4  -8   4    3.41    1.51
  -4  -8   4    2.95    1.85
   4   7  -4    7.20    1.95
   4  -7   4   12.08    4.05
  -4  -7   4    8.24    1.93
  -4  -7   4    4.85    2.09
  -4  -7   4    6.32    1.15
  -4   7  -4   14.99    3.66
   4   6  -4   10.02    2.06
   4   6  -4    9.37    2.76
   4  -6   4   12.44    3.67
  -4  -6   4   10.21    2.44
  -4  -6   4    9.45    1.86
  -4  -6   4   11.59    1.28
  -4   6  -4    7.92    2.13
  -4   6  -4   10.35    2.88
   4   5  -4    5.60    1.45
   4   5  -4    4.79    2.03
  -4  -5   4    5.52    1.65
  -4   5  -4    2.58    1.27
  -4   5  -4    1.89    1.40
  -4  -5   4    5.61    1.40
  -4  -5   4    5.12    0.94
   4   4  -4   15.01    1.49
   4   4  -4   11.04    1.83
   4   4  -4   13.60    2.97
  -4  -4   4   11.87    1.78
  -4  -4   4   13.72    2.04
  -4  -4   4   15.34    2.03
  -4  -4   4   13.66    1.28
   4  -3   4   15.55    1.43
   4  -3   4   17.03    3.20
   4  -3   4   15.00    1.53
   4  -3   4   15.65    1.24
   4  -3   4   17.43    3.24
  -4   3  -4   13.69    1.46
  -4   3  -4   16.26    2.04
  -4   3  -4   13.33    2.64
  -4  -2   4   22.97    2.17
   4   1  -4   48.81    3.17
   4  -1   4   60.35    4.56
   4   1  -4   47.68    2.89
   4  -1   4   62.02    3.51
   4   1  -4   48.43    2.92
   4   1  -4   46.75    4.55
  -4   1  -4   59.02    3.80
  -4  -1   4   46.23    3.00
  -4  -1   4   47.28    3.02
  -4  -1   4   46.67    3.47
  -4  -1   4   50.53    3.54
   4   0  -4  104.69    7.44
   4   0  -4  106.07    5.34
  -4   0   4   98.70    5.12
  -4   0   4   97.37    5.94
  -4   0   4   99.69    5.41
  -4   0   4  109.12    6.04
   4   1   4   68.10    3.91
   4   1   4   65.33    3.48
   4   1   4   68.09    2.88
   4  -1  -4   45.35    4.76
   4   1   4   68.95    4.63
   4  -1  -4   49.33    3.58
   4  -1  -4   50.24    3.35
  -4  -1  -4   64.50    5.33
  -4  -1  -4   66.40    3.59
  -4  -1  -4   67.98    2.84
  -4  -1  -4   66.15    4.02
   4   3   4   16.14    1.35
   4   3   4   15.44    1.19
   4   3   4   14.72    1.64
  -4  -3  -4   16.35    1.17
  -4  -3  -4   14.82    1.62
   4   4   4    3.45    0.78
   4   4   4    6.53    1.04
  -4  -4  -4    4.73    1.14
  -4  -4  -4    5.21    0.90
   4   5   4    1.45    0.56
   4   5   4    1.02    0.63
   4  -5  -4    5.98    2.10
  -4   5   4    5.62    1.31
  -4  -5  -4    2.01    0.96
  -4  -5  -4    1.40    0.62
   4  -6  -4    8.43    2.80
   4   6   4    9.61    1.41
   4   6   4   11.07    1.71
  -4  -6  -4   10.55    2.12
  -4   6   4   10.52    2.00
   4  -7  -4    5.82    2.62
  -4   7   4    7.09    1.82
  -4  -7  -4   14.83    2.80
   4   8   4    3.21    1.18
   4  -8  -4    2.29    2.30
  -4   8   4    3.11    1.36
  -4  -8  -4    3.45    1.85
   4  -9  -4    0.87    1.99
  -4  -9  -4   10.13    2.99
   5   9  -4   -0.10    1.36
  -5  -9   4   -1.46    1.14
  -5  -9   4   -0.03    1.13
  -5   9  -4   -0.25    1.88
   5  -8   4    4.70    2.87
   5   8  -4   10.59    2.55
  -5  -8   4    9.70    3.08
  -5  -8   4   12.10    2.38
  -5   8  -4    5.50    2.84
   5   7  -4    9.18    2.24
   5  -7   4   20.02    4.91
  -5  -7   4    7.16    2.43
  -5  -7   4   11.45    1.34
  -5   7  -4   20.43    4.26
  -5  -7   4   10.61    2.25
   5   6  -4   13.37    2.43
   5   6  -4   14.51    3.53
  -5  -6   4   13.73    1.45
  -5  -6   4   17.33    2.59
  -5  -6   4   19.63    3.03
   5   5  -4    0.92    1.32
   5  -5   4    1.64    1.71
   5   5  -4    1.05    0.84
  -5  -5   4    0.53    0.78
  -5   5  -4    2.92    1.45
  -5  -5   4   -0.11    0.58
  -5  -5   4    0.02    0.37
  -5   5  -4    2.42    1.60
   5  -4   4   13.62    3.28
   5   4  -4   15.03    3.33
   5  -4   4   14.46    3.40
   5   4  -4   11.98    1.97
  -5  -4   4   11.52    2.29
  -5  -4   4   11.28    1.83
  -5   4  -4   12.75    2.45
  -5   4  -4   15.72    3.37
   5   3  -4   25.25    3.61
   5   3  -4   23.08    1.90
   5   3  -4   23.60    2.28
  -5  -3   4   24.66    2.58
  -5  -3   4   24.15    2.16
  -5  -3   4   24.83    2.60
   5   2  -4    0.24    0.30
   5  -2   4    1.37    1.17
   5   2  -4   -0.12    0.53
   5  -2   4    1.68    0.56
   5   2  -4    0.14    1.01
  -5  -2   4    0.40    0.53
  -5  -2   4    0.58    0.58
  -5  -2   4    0.16    0.42
  -5   2  -4    2.34    0.98
  -5   2  -4    1.55    1.24
   5   1  -4   11.41    1.07
   5   1  -4   12.95    2.88
   5   1  -4   11.92    1.44
   5   1  -4    9.85    0.86
  -5  -1   4   10.19    1.43
  -5  -1   4   10.24    1.50
  -5  -1   4    9.61    1.63
   5   1   4   32.97    2.14
   5   1   4   31.88    3.27
   5   1   4   29.76    2.56
   5   1   4   32.88    1.84
  -5  -1  -4   29.80    2.03
  -5  -1  -4   31.58    3.80
  -5  -1  -4   30.48    1.78
  -5  -1  -4   32.42    2.66
   5   2   4    1.96    0.72
   5  -2  -4   -0.09    0.81
   5   2   4    2.72    0.55
   5   2   4    1.96    0.52
   5  -2  -4    0.05    0.32
  -5   2   4    0.24    0.29
  -5   2   4   -0.24    0.37
  -5   2   4    0.01    0.39
  -5  -2  -4    1.84    0.72
  -5  -2  -4    2.52    0.51
  -5   2   4    0.91    0.85
   5  -3  -4   22.61    2.36
   5  -3  -4   25.38    3.57
  -5   3   4   25.30    2.41
  -5   3   4   24.35    2.66
  -5   3   4   22.68    2.37
   5  -4  -4   12.81    3.09
   5   4   4   12.49    1.38
   5   4   4   13.41    1.31
   5  -4  -4   11.69    2.94
  -5  -4  -4   13.05    1.78
  -5   4   4   12.33    1.74
  -5  -4  -4   13.74    1.26
  -5   4   4   14.30    2.13
   5  -5  -4   -0.21    1.05
   5   5   4    1.97    0.70
   5  -5  -4   -0.24    1.04
  -5  -5  -4    2.23    1.02
  -5   5   4   -0.24    0.48
  -5  -5  -4    2.60    0.80
   5  -6  -4   11.22    3.38
  -5   6   4   14.56    2.12
   5  -7  -4   10.75    3.59
   5   7   4   21.00    2.26
  -5  -7  -4   19.72    2.95
  -5   7   4   12.91    2.48
   5  -8  -4   13.30    4.14
   5   8   4    4.22    1.34
  -5  -8  -4    3.15    1.82
   5  -9  -4    0.60    1.89
  -5  -9  -4    0.17    1.13
  -6  -9   4    0.82    1.39
  -6  -9   4    1.94    2.05
   6  -8   4    1.47    2.65
   6  -8   4    1.49    2.66
   6   8  -4   -0.27    1.00
  -6  -8   4    0.33    1.34
  -6   8  -4    0.80    2.07
  -6  -8   4    0.45    1.10
   6   7  -4   13.20    2.65
  -6  -7   4   15.95    1.56
  -6  -7   4   13.50    3.34
  -6  -7   4   18.54    2.87
   6   6  -4    6.08    1.71
   6  -6   4    0.42    1.77
  -6  -6   4    6.81    1.11
  -6  -6   4    8.72    1.91
  -6   6  -4   -0.34    1.38
  -6  -6   4    6.52    2.21
   6   5  -4    0.28    0.79
   6  -5   4   -0.07    1.34
   6  -5   4    0.19    1.60
   6   5  -4   -0.18    1.06
  -6  -5   4    0.89    0.54
  -6   5  -4    0.70    1.36
  -6  -5   4   -0.13    0.69
  -6   5  -4    0.76    0.92
  -6  -5   4    0.60    0.94
   6   4  -4   29.76    4.25
   6   4  -4   26.53    2.70
  -6  -4   4   24.19    2.42
  -6  -4   4   29.60    3.22
   6  -3   4    8.69    2.67
  -6   3  -4    7.86    1.80
  -6   3  -4    8.25    2.66
   6  -2   4    0.04    0.35
   6   2  -4    1.53    0.83
   6   2  -4    1.84    1.46
   6  -2   4    1.82    1.43
  -6  -2   4    0.72    0.72
  -6  -2   4    0.30    0.58
  -6   2  -4    0.75    0.68
  -6   2  -4   -0.18    0.96
  -6  -2   4    0.12    0.50
  -6   2  -4    0.27    0.31
   6   2   4   -0.01    0.32
   6  -2  -4    1.89    0.93
   6   2   4    0.04    0.30
   6  -2  -4    0.08    1.13
   6  -2  -4    1.51    0.35
  -6   2   4    1.67    0.85
  -6  -2  -4    0.14    0.33
  -6  -2  -4    0.48    0.57
  -6   2   4    1.37    0.70
  -6   2   4    0.80    0.96
   6  -3  -4   -0.05    1.24
  -6  -3  -4    7.34    1.52
   6  -4  -4   27.83    4.31
   6  -4  -4   30.69    3.06
  -6   4   4   29.55    3.31
  -6   4   4   24.84    2.72
   6   5   4    0.26    0.46
   6  -5  -4   -0.16    1.24
  -6  -5  -4    0.74    0.87
  -6   5   4    0.52    0.76
   6  -6  -4    7.99    3.07
   6  -6  -4    6.37    2.82
  -6   6   4    9.94    2.11
   6  -7  -4   13.96    4.22
   6  -7  -4   16.13    4.37
   6  -8  -4    0.33    1.90
   6  -8  -4   -0.56    1.95
  -6  -8  -4    0.04    1.16
   6  -9  -4   -0.18    2.09
   6  -9  -4    2.10    2.82
  -6  -9  -4    5.95    2.55
   7   8  -4    3.32    1.79
  -7   8  -4    3.57    2.81
  -7  -8   4    3.67    2.29
  -7  -8   4    3.83    1.72
   7   7  -4   16.26    2.96
  -7  -7   4   12.93    3.28
  -7   7  -4   22.12    5.15
  -7  -7   4   12.41    2.58
   7  -6   4   11.35    3.87
   7   6  -4   11.02    2.35
  -7   6  -4   11.41    3.65
  -7  -6   4   11.85    1.38
  -7   6  -4    8.78    2.46
  -7  -6   4   15.46    2.49
  -7  -6   4   11.56    2.87
   7   5  -4    0.27    0.79
   7  -5   4    4.51    2.59
   7   5  -4   -0.01    1.33
  -7  -5   4    0.26    0.91
  -7   5  -4    4.66    2.49
  -7  -5   4    0.33    0.80
  -7   5  -4    5.36    1.86
   7   4  -4   16.45    4.06
   7   4  -4   16.37    2.54
   7  -4   4   28.26    5.38
  -7  -4   4   14.54    2.23
  -7  -4   4   19.35    2.71
  -7   4  -4   25.91    3.09
  -7   4  -4   24.37    4.00
   7  -3   4    9.16    2.95
  -7   3  -4   15.45    2.38
  -7   3  -4   12.36    3.27
  -7   3  -4   12.49    1.37
   7   1  -4   25.24    2.57
   7   1  -4   29.62    4.47
  -7  -1   4   30.92    2.67
  -7  -1   4   33.43    3.07
  -7  -1   4   30.81    3.05
   7  -1  -4   28.43    2.84
   7  -1  -4   33.25    4.71
  -7   1   4   28.16    2.60
  -7   1   4   29.12    2.85
  -7   1   4   35.31    3.26
   7  -2  -4   69.56    7.32
   7  -2  -4   68.57    3.52
   7  -2  -4   74.88    5.10
  -7   2   4   74.17    5.31
  -7   2   4   79.03    5.40
  -7   2   4   71.55    6.33
   7  -3  -4    0.27    1.52
   7  -4  -4   14.43    2.67
   7  -4  -4   16.96    4.23
  -7   4   4   16.16    2.27
  -7   4   4   14.86    2.92
   7  -5  -4   -0.96    1.34
   7   5   4    6.37    1.34
  -7  -5  -4    6.79    1.91
   7  -6  -4   11.67    3.81
   7   6   4   11.70    1.76
  -7  -6  -4    8.38    2.27
   7   7   4   29.67    2.97
   7  -7  -4   15.56    4.92
  -7  -7  -4   25.95    3.66
   7  -8  -4    7.59    3.82
  -7  -8  -4    4.96    2.27
   8   8  -4   -0.82    1.28
  -8  -8   4    0.79    1.26
  -8  -8   4   -0.05    1.56
   8   7  -4   -0.28    1.14
  -8   7  -4    1.42    2.23
  -8  -7   4   -0.34    0.95
  -8  -7   4   -0.61    1.11
   8   6  -4    0.26    1.03
  -8   6  -4   16.07    4.42
   8   5  -4    2.23    1.29
  -8   5  -4   -0.47    1.44
  -8  -5   4    1.10    1.12
  -8  -5   4    0.28    0.92
  -8   5  -4    1.15    1.27
  -8  -5   4    1.07    0.61
   8   4  -4    4.64    1.60
   8   4  -4    7.72    3.14
  -8  -4   4   10.58    2.38
  -8  -4   4    8.91    1.87
   8   3  -4   21.83    4.71
   8   3  -4   16.33    2.63
  -8   3  -4   30.89    3.40
  -8   3  -4   28.68    4.72
  -8  -3   4   21.58    2.93
  -8  -3   4   20.28    2.45
  -8   2  -4   18.25    4.31
   8   1  -4    2.30    1.09
   8   1  -4    0.49    1.54
  -8  -1   4    2.57    1.11
  -8   1  -4    6.65    1.73
  -8  -1   4    1.47    0.92
  -8   1  -4    6.60    2.62
   8   0   4   36.88    2.85
  -8   0  -4   37.85    2.65
  -8   0  -4   38.05    3.65
  -8   0  -4   31.84    4.86
   8  -1  -4    2.52    1.22
   8   1   4    6.02    1.13
   8  -1  -4    1.09    1.62
  -8  -1  -4    7.92    2.97
  -8  -1  -4    5.67    1.54
  -8  -1  -4    6.51    1.16
  -8   1   4    4.06    1.32
  -8   1   4    1.92    1.14
   8  -2  -4    1.42    1.84
   8   3   4   27.51    2.29
   8  -3  -4   21.90    3.32
   8  -3  -4   19.89    1.40
   8  -3  -4   28.22    5.78
  -8   3   4   23.38    3.55
  -8   3   4   18.69    2.67
  -8  -3  -4   30.23    3.13
   8  -4  -4    7.72    2.10
   8  -4  -4    9.38    3.60
  -8   4   4    6.91    1.99
   8   5   4    0.96    0.72
   8  -5  -4    0.51    1.98
  -8  -5  -4    0.44    1.11
   8   6   4   14.30    2.07
  -8  -6  -4   14.18    3.00
   8  -7  -4   -0.09    1.93
  -8  -7  -4    0.88    1.37
   8  -8  -4    0.29    2.68
  -8  -8  -4    2.99    1.99
   9   7  -4    5.37    1.98
  -9  -7   4   11.89    2.56
  -9  -7   4   11.95    3.37
  -9   7  -4    0.53    2.54
   9   6  -4    0.35    1.15
  -9   6  -4    3.17    2.53
  -9  -6   4    0.70    0.59
  -9  -6   4   -0.58    1.21
  -9  -6   4    0.54    1.00
   9   5  -4    0.54    1.16
  -9  -5   4    0.33    0.97
  -9   5  -4    2.84    1.61
  -9   5  -4   -0.07    1.63
  -9  -5   4    0.79    1.20
  -9  -5   4    0.93    0.62
   9   4  -4    3.05    1.44
   9   4  -4    5.81    2.81
  -9   4  -4    3.61    2.50
  -9  -4   4    4.45    1.86
  -9   4  -4    6.64    2.19
  -9  -4   4    3.56    1.42
   9   3  -4   26.10    3.02
   9   3  -4   25.77    5.60
  -9  -3   4   27.74    2.95
  -9  -3   4   29.68    3.57
   9   2  -4    2.16    1.11
   9   2  -4    2.17    2.32
  -9   2  -4    8.24    3.18
  -9   2  -4    7.26    2.04
  -9  -2   4    2.65    1.32
  -9  -2   4    1.53    1.02
   9   1  -4    0.17    1.62
   9   1  -4   -0.61    0.66
  -9   1  -4    3.22    2.13
  -9  -1   4   -0.42    0.67
  -9   1  -4    1.96    1.28
  -9  -1   4   -0.53    0.66
  -9   1  -4    3.24    1.07
   9   0  -4   31.51    5.87
   9   0  -4   27.84    3.07
  -9   0  -4   20.78    3.01
  -9   0   4   31.87    3.16
  -9   0  -4   22.56    5.16
  -9   0   4   30.36    2.94
   9  -1  -4    0.28    0.83
   9  -1  -4    0.60    1.66
   9   1   4    2.60    0.89
  -9  -1  -4    2.34    1.21
  -9   1   4   -0.13    0.84
  -9  -1  -4    1.42    1.88
   9  -2  -4    2.81    0.60
   9  -2  -4    3.32    2.47
   9  -2  -4    2.70    1.30
  -9  -2  -4    9.22    2.14
  -9   2   4    1.35    1.05
   9  -3  -4   27.78    3.37
   9  -3  -4   27.49    1.71
   9  -3  -4   32.01    6.49
  -9   3   4   26.48    4.26
   9   4   4    6.38    1.37
   9  -4  -4    6.01    3.26
   9  -4  -4    5.12    1.89
  -9  -4  -4    7.54    2.10
   9  -5  -4    0.60    2.33
  -9  -5  -4    1.72    1.40
   9  -6  -4   -0.15    2.24
  -9  -6  -4    1.75    1.42
   9  -7  -4   10.58    4.40
 -10  -7   4    7.43    2.18
  10   6  -4   -0.01    1.17
 -10   6  -4    5.11    3.41
 -10  -6   4    0.27    1.44
 -10  -6   4   -0.13    1.15
  10   5  -4   16.08    3.03
 -10   5  -4   16.26    4.77
 -10  -5   4   16.90    3.57
 -10  -5   4   18.08    2.99
 -10  -5   4   16.38    1.73
 -10   4  -4   18.58    5.10
  10   3  -4   17.45    4.90
  10   3  -4   11.51    2.45
 -10  -3   4   16.28    2.72
 -10  -3   4   10.32    2.56
  10   2  -4    0.55    1.02
  10   2  -4    0.88    2.10
 -10  -2   4    1.14    1.05
 -10   2  -4    0.16    1.02
 -10   2  -4    1.87    2.24
 -10  -2   4    0.51    1.04
 -10   2  -4    0.68    0.84
  10   1  -4   11.38    4.13
  10   1  -4   12.51    2.58
 -10  -1   4   12.54    2.40
 -10   1  -4   14.81    3.03
 -10   1  -4   14.51    4.60
  10   0  -4   15.00    4.47
  10   0  -4    9.33    2.24
 -10   0   4   11.21    2.27
 -10   0  -4   14.35    4.44
 -10   0  -4   11.95    2.59
  10  -1  -4    8.58    3.63
  10  -1  -4    9.09    2.28
  10  -1  -4    8.65    1.02
 -10  -1  -4   15.48    2.91
 -10   1   4    9.26    2.10
  10  -2  -4    0.42    0.38
  10  -2  -4    1.28    1.22
  10  -2  -4    0.97    2.42
 -10  -2  -4   -0.34    0.88
 -10   2   4    1.43    1.22
  10  -3  -4   13.42    4.89
  10  -3  -4   15.63    3.12
 -10   3   4   10.65    2.28
  10  -4  -4    3.05    3.04
  10  -5  -4    9.49    4.32
 -10  -5  -4   15.01    3.26
  10  -6  -4    0.25    2.65
 -10  -6  -4    3.93    2.01
  10  -7  -4   10.35    4.99
 -11  -6   4    1.29    1.35
  11   5  -4    0.69    1.34
 -11  -5   4    0.65    1.29
  11   4  -4    5.10    1.84
 -11   4  -4   19.80    5.55
 -11  -4   4    6.65    1.28
 -11  -4   4    8.24    2.13
  11   3  -4   12.51    2.80
 -11  -3   4   14.71    2.76
  11   2  -4    1.36    1.28
  11   2  -4    0.34    1.91
 -11   2  -4   -0.76    1.85
 -11  -2   4    1.08    1.23
 -11   2  -4    0.67    1.09
  11   1  -4    1.06    2.27
  11   1  -4    1.42    1.28
 -11   1  -4    0.29    1.15
 -11  -1   4    1.49    1.19
 -11   1  -4    0.29    2.15
  11   0  -4    9.19    4.01
  11   0  -4    8.57    2.23
 -11   0   4    8.42    2.12
 -11   0  -4    2.20    2.57
  11  -1  -4    2.54    1.45
  11  -1  -4    1.55    2.38
 -11   1   4    0.90    1.02
 -11  -1  -4    0.80    1.13
  11  -2  -4   -0.25    2.15
  11  -2  -4   -0.05    1.12
 -11   2   4    0.17    1.13
 -11  -2  -4    0.23    1.01
  11  -3  -4   14.15    5.09
  11  -3  -4   16.65    3.34
 -11   3   4   18.49    3.17
  11  -4  -4    6.38    4.13
 -11   4   4    6.84    2.13
  11  -5  -4    0.88    2.72
 -11  -5  -4    0.18    1.27
  11  -6  -4    1.16    3.42
 -12  -5   4   -0.44    1.33
  12   4  -4    6.21    2.41
 -12  -4   4    8.38    1.44
 -12  -4   4   10.61    2.51
  12   3  -4   -0.25    1.16
 -12  -3   4   -0.14    1.18
 -12   3  -4    0.68    2.54
 -12   3  -4    3.94    2.08
  12   2  -4    1.30    1.55
 -12   2  -4    1.81    1.54
 -12  -2   4    2.19    1.50
 -12   2  -4    1.14    2.42
  12   1  -4    7.59    2.26
  12   1  -4    9.34    4.14
 -12  -1   4    8.15    2.25
  12   0  -4    3.28    1.76
  12   0  -4    4.86    3.80
 -12   0   4    4.81    1.90
  12  -1  -4    4.67    3.70
  12  -1  -4   10.04    2.69
 -12   1   4    9.82    2.54
  12  -2  -4    0.88    2.57
  12  -2  -4    0.46    1.43
 -12  -2  -4    0.62    1.18
 -12   2   4    1.15    1.46
  12  -3  -4    0.02    1.29
  12  -3  -4    0.98    2.83
 -12  -3  -4    2.76    1.63
 -12   3   4    0.91    1.53
  12  -4  -4    6.74    4.40
 -12  -4  -4    5.34    2.23
 -12   4   4   10.68    2.77
  12  -5  -4    0.81    3.16
 -12   5   4   -0.97    1.40
 -13  -3   4    0.45    1.27
  13   2  -4    4.25    1.90
 -13  -2   4    6.39    2.18
  13   1  -4    1.00    1.44
 -13  -1   4    0.95    1.44
 -13   1  -4   -0.12    1.27
  13   0  -4    0.59    1.52
 -13   0   4   -0.09    1.41
 -13   0  -4   -1.54    1.05
  13  -1  -4    0.64    1.51
  13  -1  -4    1.28    3.30
 -13   1   4    2.34    1.73
 -13  -1  -4   -1.03    1.14
  13  -2  -4    9.37    5.01
  13  -2  -4    3.46    2.16
 -13  -2  -4    0.10    1.12
 -13   2   4    6.76    2.24
  13  -3  -4   -1.57    2.84
 -13   3   4    0.11    1.50
   0   9  -5    0.14    1.42
   0  -9   5    0.35    1.57
   0   8  -5   25.48    4.16
   0  -8   5   20.20    4.45
   0  -7   5    3.50    1.30
   0   7  -5    1.54    1.57
   0  -7   5    3.29    0.91
   0   7  -5    3.53    1.75
   0  -7   5    3.00    1.81
   0  -6   5    0.22    0.70
   0  -6   5   -0.09    0.89
   0  -6   5    0.96    0.55
   0   6  -5    1.59    1.36
   0   6  -5    0.30    0.94
   0   5  -5    5.38    1.80
   0   5  -5    6.06    0.96
   0  -5   5    6.33    1.87
   0   5  -5    6.24    1.89
   0  -5   5    6.47    1.03
   0  -5   5    5.46    1.23
   0   4  -5   21.37    1.77
   0   4  -5   21.24    1.46
   0  -4   5   19.93    2.56
   0   4  -5   19.61    2.63
   0   4  -5   20.77    2.68
   0  -4   5   20.24    1.86
   0  -4   5   19.26    1.55
   0  -3   5   10.17    1.85
   0   3  -5    9.51    0.79
   0  -3   5    8.84    0.87
   0  -3   5   10.31    1.14
   0  -3   5    9.26    1.15
   0  -3   5    9.08    0.89
   0   3  -5    9.13    1.88
   0   3  -5    7.84    1.69
   0   3  -5    8.72    0.96
   0  -2   5  190.49   10.90
   0   2  -5  198.63   11.61
   0  -2   5  180.58    8.53
   0   2  -5  187.78   11.18
   0  -2   5  207.79   10.01
   0  -2   5  197.78    8.41
   0  -2   5  202.41    9.95
   0   1  -5   18.33    1.34
   0   1  -5   17.38    1.46
   0  -1   5   18.36    1.25
   0  -1   5   18.24    1.25
   0  -1   5   18.08    1.60
   0  -1   5   18.70    1.24
   0   1  -5   17.69    1.80
   0   1  -5   17.95    1.85
   0   0   5    0.60    0.27
   0   0  -5    0.14    0.29
   0   0  -5    0.42    0.41
   0   0  -5    0.37    0.29
   0   0  -5    0.29    0.30
   0  -1  -5   21.26    1.33
   0  -1  -5   19.90    1.60
   0   1   5   19.02    1.16
   0  -1  -5   19.92    1.52
   0  -2  -5  205.86   10.47
   0  -2  -5  208.91    9.14
   0  -2  -5  208.58   10.78
   0  -3  -5    8.17    0.99
   0  -3  -5    9.33    0.98
   0  -4  -5   19.71    1.91
   0   4   5   20.88    1.59
   0  -5  -5    4.66    1.23
   0   5   5    4.92    0.99
   0   5   5    5.15    1.22
   0   5   5    5.49    1.04
   0   6   5    0.48    0.49
   0  -6  -5    0.14    0.67
   0  -7  -5    2.09    1.32
   0   7   5    3.01    1.07
   0   7   5    2.07    0.91
   0  -8  -5   24.22    3.68
   0   8   5   26.47    2.88
   0   9   5   -0.27    0.63
   0  -9  -5   -0.44    1.17
   0 -10  -5    9.71    3.37
   1  -9   5    2.57    2.30
   1   9  -5    0.40    1.74
  -1  -9   5    0.10    1.43
  -1   9  -5    1.91    2.02
   1  -8   5   12.18    3.53
   1   8  -5   10.07    3.14
  -1   8  -5    8.98    3.07
  -1  -8   5   10.73    2.39
  -1  -8   5    7.72    2.74
  -1  -8   5    8.57    1.41
   1  -7   5   14.66    3.61
   1   7  -5    2.29    1.45
  -1   7  -5   15.67    3.31
  -1   7  -5   13.45    3.32
   1   6  -5    3.17    1.58
   1  -6   5    5.02    1.38
   1   6  -5    1.90    1.32
   1  -6   5    5.60    1.06
   1  -6   5    5.59    2.13
  -1  -6   5    2.27    1.38
  -1   6  -5    5.76    2.02
  -1  -6   5    2.87    0.81
  -1   6  -5    5.31    1.84
  -1  -6   5    2.76    1.11
   1   5  -5    3.20    0.68
   1   5  -5    1.95    1.18
   1   5  -5    1.77    1.16
   1  -5   5    0.19    0.82
  -1  -5   5    2.26    1.33
  -1  -5   5    2.69    0.69
  -1   5  -5    0.09    0.77
  -1  -5   5    2.20    0.91
   1  -2   5  276.17   14.73
   1  -2   5  302.77   16.17
   1  -2   5  316.10   12.34
   1  -2   5  305.39   12.79
   1  -2   5  310.50   14.79
   1  -2   5  280.70   13.07
  -1   2  -5  290.42   17.03
  -1   2  -5  286.89   16.08
   1   0  -5   -0.11    0.25
   1   0   5   -0.03    0.15
   1   0  -5    0.07    0.47
   1   0  -5    0.03    0.24
   1   0  -5   -0.07    0.28
   1   0   5   -0.05    0.07
   1   0  -5    0.14    0.24
  -1   0  -5   -0.30    0.32
  -1   0  -5    0.14    0.32
  -1   0   5    0.02    0.11
  -1   0  -5   -0.19    0.21
  -1   0   5   -0.06    0.09
  -1   0  -5   -0.01    0.19
  -1   0   5   -0.11    0.26
  -1   0  -5    0.28    0.43
   1  -4  -5    2.44    0.85
  -1   4   5    2.19    0.56
  -1   4   5    2.69    0.65
  -1   4   5    2.32    0.68
   1  -5  -5    2.71    1.13
  -1   5   5    3.79    0.83
  -1   5   5    3.47    1.02
  -1   5   5    3.92    0.91
   1  -6  -5    3.27    1.40
   1   6   5    5.24    1.15
   1   6   5    5.94    1.21
  -1  -6  -5    4.25    1.37
  -1   6   5    3.35    1.01
  -1  -7  -5   13.29    2.71
   1   8   5   10.52    1.94
   1  -8  -5   11.81    3.21
  -1  -8  -5    8.02    2.46
  -1   8   5   11.59    2.25
  -1   8   5    9.79    1.99
   1  -9  -5    0.60    1.52
   1   9   5    1.96    1.10
  -1   9   5    1.13    1.02
  -1  -9  -5    1.32    1.59
   1 -10  -5    5.94    3.08
  -1 -10  -5    1.04    1.86
   2   9  -5   35.09    4.11
   2   9  -5   42.99    5.96
  -2  -9   5   41.47    4.24
   2  -8   5    0.46    1.68
   2   8  -5    0.34    1.01
   2   8  -5    0.37    1.33
  -2  -8   5   -0.02    0.45
  -2  -8   5   -1.06    0.79
  -2   8  -5    3.76    2.28
  -2  -8   5    0.03    1.42
   2   7  -5    3.04    1.78
   2  -7   5   12.47    3.44
   2   7  -5    3.10    1.79
   2   7  -5    2.31    1.29
  -2  -7   5    2.31    0.81
  -2  -7   5    2.44    1.67
  -2  -7   5    2.01    1.12
   2   6  -5    6.85    2.17
   2   6  -5    7.94    2.46
   2  -6   5    4.44    2.09
  -2  -6   5    8.86    1.16
  -2  -6   5    7.21    2.16
  -2   6  -5    5.43    2.15
  -2   6  -5    3.00    1.56
  -2  -6   5    9.17    1.80
   2   5  -5   18.24    3.34
  -2  -5   5   18.32    1.94
   2  -3   5   15.06    2.24
   2  -3   5   14.88    1.25
   2  -3   5   15.57    1.45
   2  -3   5   15.22    1.48
  -2   3  -5   17.29    2.09
  -2   3  -5   13.42    2.12
  -2   3  -5   14.36    1.40
   2  -1   5   51.71    2.93
   2  -1   5   51.37    3.07
   2  -1   5   49.72    3.68
   2  -1   5   53.10    2.58
  -2   1  -5   53.63    4.10
  -2   1  -5   53.02    3.56
  -2   1  -5   54.11    3.23
   2   0   5   -0.04    0.05
   2   0  -5    0.15    0.36
   2   0  -5    0.09    0.24
   2   0  -5    0.00    0.58
   2   0   5   -0.06    0.15
  -2   0  -5   -0.09    0.24
  -2   0  -5   -0.12    0.13
  -2   0  -5    0.01    0.52
  -2   0   5   -0.07    0.30
  -2   0  -5    0.31    0.35
  -2   0   5   -0.22    0.17
  -2   0   5   -0.06    0.13
   2  -1  -5  110.60    5.31
   2  -1  -5  104.87    6.41
   2  -1  -5  101.50    5.66
   2  -1  -5  106.83    5.92
   2  -1  -5  104.50    5.74
  -2   1   5  101.19    5.35
  -2   1   5  110.76    5.26
   2  -2  -5   48.89    3.03
   2  -2  -5   50.49    3.62
   2  -2  -5   53.81    3.06
   2  -2  -5   47.61    2.99
  -2   2   5   45.24    2.73
  -2   2   5   47.44    2.59
   2  -3  -5    3.90    0.97
   2  -3  -5    4.89    1.21
  -2   3   5    4.39    0.60
   2   6   5    3.57    0.95
   2  -6  -5    8.21    2.20
  -2  -6  -5    4.60    1.41
  -2   6   5    9.01    1.59
   2   7   5   15.18    1.87
  -2  -7  -5   12.81    2.57
   2  -8  -5   -0.10    1.16
   2   8   5    1.90    0.93
  -2   8   5   -0.06    0.66
  -2  -8  -5    3.55    1.70
   2  -9  -5   37.25    5.68
  -2   9   5   42.37    4.20
  -2   9   5   47.58    4.40
   2 -10  -5    0.60    2.01
  -2 -10  -5    5.18    2.74
   3   9  -5   19.49    3.56
   3   9  -5   28.01    5.54
  -3  -9   5   29.69    3.65
  -3  -9   5   25.58    5.27
   3   8  -5    1.82    1.82
   3  -8   5    0.66    1.96
   3   8  -5    0.94    1.13
  -3   8  -5    0.91    1.69
  -3  -8   5    0.89    1.57
  -3  -8   5    1.17    1.14
  -3  -8   5    1.29    0.65
   3   7  -5    9.15    2.75
   3   7  -5   10.17    2.88
   3   7  -5    8.07    1.98
  -3  -7   5   10.72    1.38
  -3  -7   5    8.83    1.96
  -3  -7   5    7.11    2.45
   3  -6   5    8.90    1.47
   3  -6   5   11.68    3.39
  -3   6  -5   14.61    3.04
  -3   6  -5   13.65    3.20
   3   5  -5   10.18    2.68
   3   5  -5    8.05    1.70
  -3  -5   5   10.70    1.22
  -3  -5   5    9.02    1.69
  -3  -5   5    7.56    2.00
  -3  -3   5   33.18    2.75
   3  -2   5   32.04    1.97
   3  -2   5   25.83    3.01
   3  -2   5   30.89    2.38
   3  -2   5   30.47    3.13
   3  -2   5   32.48    2.18
  -3   2  -5   30.04    3.21
  -3   2  -5   33.09    2.83
   3   1  -5   31.19    1.64
   3   1  -5   30.48    2.11
   3   1  -5   30.97    3.26
   3   1  -5   36.08    2.41
  -3  -1   5   31.56    2.38
  -3  -1   5   32.41    2.44
  -3  -1   5   34.87    2.12
  -3  -1   5   34.53    2.26
   3   0  -5    0.02    0.66
   3   0  -5    0.24    0.24
   3   0   5   -0.01    0.13
   3   0  -5    0.16    0.35
   3   0   5   -0.10    0.21
   3   0   5   -0.12    0.14
  -3   0  -5    0.11    0.33
  -3   0   5    0.04    0.15
  -3   0  -5    0.02    0.25
  -3   0   5    0.27    0.29
  -3   0  -5    0.53    0.65
  -3   0   5    0.24    0.38
  -3   0   5    0.12    0.34
   3   1   5  110.08    6.09
   3   1   5  117.17    5.93
  -3  -1  -5  116.34    7.94
  -3  -1  -5  123.51    6.38
  -3  -1  -5  119.17    6.56
   3  -5  -5    8.99    2.28
  -3   5   5    9.21    1.58
  -3  -6  -5    9.80    2.01
   3  -7  -5    7.68    2.64
  -3   7   5    9.60    1.98
   3   8   5    0.95    0.76
   3  -8  -5    0.62    1.41
  -3   8   5    0.56    0.81
  -3  -8  -5    1.35    1.24
   3  -9  -5   26.89    5.84
   3   9   5   12.91    2.35
  -3  -9  -5   15.71    3.58
   4   9  -5    0.69    1.74
   4   9  -5    1.59    1.50
  -4  -9   5   -0.35    1.11
  -4   9  -5   17.65    4.63
  -4  -9   5    1.27    1.78
   4   8  -5   35.15    5.14
   4   8  -5   33.02    3.94
  -4  -8   5   29.89    4.63
  -4  -8   5   33.39    3.64
  -4  -8   5   35.68    2.55
   4  -7   5    0.40    1.59
   4   7  -5    0.55    1.01
  -4  -7   5    0.40    1.16
  -4   7  -5    0.65    1.15
  -4  -7   5    0.42    0.53
  -4  -7   5    0.56    0.97
  -4   7  -5    0.38    1.46
   4   6  -5    3.97    1.90
   4   6  -5    5.57    1.69
   4  -6   5   14.87    3.85
  -4  -6   5    4.09    1.71
  -4   6  -5   13.96    2.88
  -4   6  -5   13.00    3.27
  -4  -6   5    4.50    1.43
  -4  -6   5    5.00    1.02
   4  -5   5   52.94    5.69
   4   5  -5   41.54    3.57
   4   5  -5   43.25    5.03
  -4  -5   5   41.22    3.27
  -4  -5   5   41.74    4.19
  -4   5  -5   49.68    5.26
  -4  -5   5   38.77    2.75
  -4   5  -5   47.79    4.42
   4  -3   5    2.96    0.74
   4   3  -5    3.79    1.63
   4   3  -5    4.59    0.86
   4  -3   5    3.83    0.72
   4  -3   5    4.04    1.64
   4   3  -5    4.37    1.12
   4  -3   5    5.00    1.75
   4  -3   5    4.34    0.93
  -4  -3   5    5.03    1.10
  -4   3  -5    3.21    1.48
  -4   3  -5    4.42    1.32
  -4  -3   5    4.62    1.25
   4   2  -5    0.16    0.85
   4  -2   5   -0.01    0.25
   4  -2   5   -0.03    0.27
   4  -2   5    0.02    0.34
   4   2  -5   -0.23    0.19
   4   2  -5    0.01    0.23
   4  -2   5   -0.50    0.58
  -4  -2   5    0.26    0.48
  -4  -2   5   -0.24    0.39
  -4  -2   5    0.33    0.51
  -4   2  -5   -0.23    0.64
  -4   2  -5   -0.06    0.30
  -4   2  -5    0.18    0.47
   4  -1   5   15.06    2.27
   4  -1   5   18.95    1.38
   4  -1   5   17.63    1.71
   4  -1   5   19.71    1.49
  -4   1  -5   19.62    1.56
  -4   1  -5   20.93    2.73
  -4   1  -5   17.67    1.99
   4   0   5   -0.18    0.23
   4   0   5   -0.05    0.19
   4   0  -5    0.13    0.19
   4   0  -5    0.56    0.91
   4   0   5    0.18    0.22
   4   0  -5    0.06    0.39
   4   0   5   -0.12    0.63
  -4   0  -5   -0.08    0.31
  -4   0   5    0.24    0.34
  -4   0   5   -0.05    0.15
  -4   0   5   -0.13    0.37
  -4   0  -5   -0.06    0.22
  -4   0   5   -0.04    0.37
  -4   0  -5    0.12    0.66
   4   1   5   18.83    1.33
   4   1   5   17.74    1.62
   4   1   5   18.43    1.18
  -4  -1  -5   18.19    1.70
  -4  -1  -5   17.78    1.44
  -4  -1  -5   18.78    2.68
   4  -2  -5   -0.32    0.30
   4  -2  -5   -0.28    0.74
   4   2   5    0.06    0.22
   4   2   5    0.16    0.36
  -4   2   5    0.12    0.21
  -4   2   5   -0.14    0.27
  -4  -2  -5    0.04    0.24
  -4  -2  -5    0.19    0.18
  -4  -2  -5   -0.09    0.81
  -4   2   5   -0.05    0.36
  -4  -2  -5   -0.08    0.32
   4   3   5    3.91    0.96
   4  -3  -5    6.45    1.90
   4  -3  -5    4.83    1.74
   4   3   5    4.72    0.65
   4   3   5    5.18    0.73
   4  -3  -5    3.64    1.07
  -4  -3  -5    5.22    1.10
  -4   3   5    4.92    0.74
  -4  -3  -5    4.49    0.63
  -4   3   5    5.79    1.21
  -4   3   5    5.13    1.15
   4   4   5   47.06    3.11
   4   4   5   53.99    3.88
   4   4   5   50.79    2.81
  -4  -4  -5   49.91    2.70
  -4  -4  -5   45.14    3.57
   4  -5  -5   39.71    4.81
   4   5   5   51.91    3.30
  -4   5   5   40.26    3.53
  -4  -5  -5   52.29    3.93
   4   6   5   12.69    1.57
  -4  -6  -5   13.15    2.35
   4  -7  -5    0.50    1.50
   4   7   5    0.41    0.56
  -4  -7  -5    0.65    1.01
  -4   7   5   -0.02    0.73
   4  -8  -5   31.71    6.08
   4   9   5   17.49    2.68
  -4  -9  -5   18.14    3.85
  -5  -9   5    3.29    1.63
  -5  -9   5    6.42    2.99
   5   8  -5   20.42    3.46
  -5  -8   5   24.36    2.11
  -5  -8   5   24.57    4.82
  -5  -8   5   24.68    3.09
   5  -7   5    0.52    1.79
   5   7  -5    0.55    1.11
  -5  -7   5    1.10    1.33
  -5   7  -5    0.12    1.45
  -5  -7   5    0.75    0.61
  -5   7  -5    1.01    1.45
  -5  -7   5    1.08    1.10
   5  -6   5   11.61    3.60
   5   6  -5    1.03    1.02
  -5  -6   5    1.40    1.26
  -5   6  -5    9.28    2.87
  -5   6  -5   12.04    2.72
   5   5  -5   13.54    3.31
   5   5  -5   16.19    2.48
   5  -5   5   24.03    4.68
   5  -5   5   20.42    4.22
  -5  -5   5   14.35    1.51
  -5  -5   5   13.61    2.17
  -5  -5   5   16.29    3.05
  -5   5  -5   21.33    3.55
   5   4  -5    1.13    0.80
   5  -4   5    0.26    1.20
   5  -4   5    0.90    1.31
   5   4  -5    1.11    1.20
  -5   4  -5    0.05    0.68
  -5  -4   5    1.13    0.89
  -5  -4   5    1.29    0.81
  -5   4  -5    0.17    0.99
   5  -3   5    8.75    2.46
   5  -3   5    6.74    1.26
  -5   3  -5    5.23    1.99
  -5   3  -5    7.44    1.76
   5  -1   5   42.43    4.20
   5  -1   5   40.93    2.75
  -5   1  -5   43.48    2.76
  -5   1  -5   42.55    3.46
  -5   1  -5   45.33    4.62
   5   0  -5    0.03    0.19
   5   0   5    0.16    0.28
   5   0   5    0.35    0.44
   5   0  -5   -0.61    0.78
   5   0  -5   -0.04    0.23
   5   0   5    0.77    0.88
  -5   0  -5   -0.14    0.21
  -5   0  -5   -0.19    0.72
  -5   0   5   -0.19    0.34
  -5   0  -5    0.12    0.48
  -5   0   5   -0.01    0.20
  -5   0   5   -0.05    0.38
  -5   0   5   -0.08    0.42
   5   1   5   43.02    3.19
   5   1   5   42.70    2.70
  -5  -1  -5   44.80    2.13
  -5  -1  -5   42.29    3.24
  -5  -1  -5   42.36    4.54
  -5  -1  -5   42.05    2.72
   5  -3  -5    1.52    0.86
   5  -3  -5    1.45    1.40
  -5   3   5    1.69    0.78
   5  -4  -5    1.38    1.43
   5  -4  -5    1.03    1.23
   5   4   5    0.43    0.39
   5  -4  -5    0.32    0.75
  -5   4   5    0.53    0.62
  -5  -4  -5    0.09    0.49
   5  -5  -5   14.00    3.38
   5  -5  -5   14.87    3.55
  -5   5   5   15.75    2.11
   5   6   5   10.07    1.47
   5  -7  -5    1.68    1.94
   5   7   5    1.07    0.76
  -5  -7  -5    0.05    1.03
  -5   7   5    1.67    1.00
   5  -8  -5   20.96    5.04
   5   8   5    5.51    1.49
  -5  -8  -5    6.10    2.22
   5  -9  -5    3.72    2.85
  -5  -9  -5    2.27    1.75
  -6  -9   5   -0.22    1.25
   6   8  -5    0.33    1.27
  -6   8  -5   10.61    3.82
  -6  -8   5   -0.26    0.96
  -6  -8   5   -0.32    1.44
   6   7  -5   11.89    2.57
  -6  -7   5   11.90    2.49
  -6  -7   5   11.65    1.46
  -6  -7   5   11.17    2.94
   6   6  -5    9.95    3.25
   6  -6   5    3.60    2.52
   6  -6   5    3.76    2.59
   6   6  -5    9.92    2.12
  -6  -6   5    8.30    1.89
  -6   6  -5    3.77    2.27
  -6  -6   5   10.24    2.67
  -6  -6   5   11.10    1.40
   6  -5   5   35.60    5.07
   6  -5   5   35.28    4.94
   6   5  -5   18.70    2.48
   6   5  -5   22.54    4.57
  -6  -5   5   19.59    2.99
  -6  -5   5   19.79    1.82
  -6  -5   5   18.70    2.37
   6   4  -5   17.47    2.26
   6   4  -5   16.67    3.94
  -6  -4   5   19.14    2.17
  -6  -4   5   18.65    2.63
   6  -3   5   23.16    4.29
  -6   3  -5   22.48    2.79
  -6   3  -5   24.48    3.76
   6  -2   5   25.10    3.51
   6   2  -5   20.44    2.27
   6   2  -5   17.19    3.84
   6   2  -5   19.47    1.59
   6  -2   5   26.24    2.12
  -6  -2   5   18.40    2.10
  -6   2  -5   24.38    1.87
  -6   2  -5   26.33    3.77
  -6  -2   5   22.45    2.55
  -6  -2   5   16.45    2.26
  -6   2  -5   24.68    2.65
   6  -1   5   35.00    4.21
   6  -1   5   40.22    2.79
  -6   1  -5   39.88    2.63
  -6   1  -5   40.26    3.53
  -6   1  -5   43.95    4.93
   6   0  -5   -0.95    0.79
   6   0  -5   -0.29    0.52
   6   0  -5   -0.02    0.17
   6   0   5    0.00    0.32
  -6   0   5   -0.24    0.40
  -6   0  -5    0.38    0.60
  -6   0   5   -0.27    0.46
  -6   0  -5    0.03    0.24
  -6   0  -5   -0.16    0.30
  -6   0  -5   -0.24    0.84
  -6   0   5    0.12    0.54
   6  -1  -5   13.33    3.26
   6  -1  -5   10.07    1.77
   6  -1  -5   13.09    0.86
  -6   1   5   15.32    1.95
  -6   1   5   12.65    1.87
  -6   1   5   10.86    1.52
   6   2   5   24.08    1.86
   6  -2  -5   21.71    4.23
   6  -2  -5   19.09    2.27
  -6  -2  -5   24.02    2.39
  -6   2   5   20.61    2.43
  -6  -2  -5   25.28    3.94
   6  -4  -5   22.67    4.49
   6  -4  -5   18.62    2.40
  -6   4   5   17.17    2.28
   6  -5  -5   20.65    4.51
   6   5   5   34.16    2.65
  -6  -5  -5   34.68    3.40
  -6   5   5   22.44    2.85
   6  -6  -5   12.31    3.58
   6   6   5    4.79    1.21
   6  -6  -5    8.73    3.18
  -6   6   5    9.57    2.02
  -6  -6  -5    3.29    1.40
   6  -7  -5    9.71    3.60
   6  -7  -5   10.36    3.69
  -6   7   5   12.03    2.50
   6  -8  -5    0.10    2.28
   6   8   5   11.68    2.03
  -6  -8  -5   13.87    3.28
   6  -9  -5    0.23    2.32
   6  -9  -5   -0.90    2.11
   7   8  -5   15.17    3.12
  -7  -8   5   17.84    3.21
  -7  -8   5   20.65    4.66
   7   7  -5    2.15    1.42
  -7  -7   5    2.28    0.80
  -7  -7   5    1.56    1.30
  -7   7  -5    0.61    1.77
  -7  -7   5    1.42    1.64
   7   6  -5   11.04    2.47
  -7   6  -5    7.50    3.24
  -7  -6   5    9.83    1.51
  -7  -6   5   10.44    2.20
  -7  -6   5    9.68    2.81
  -7   6  -5   10.92    2.82
   7   5  -5    2.95    2.15
   7   5  -5    3.45    1.50
  -7   5  -5    2.52    2.03
  -7  -5   5    2.52    1.27
  -7   5  -5    3.08    1.57
  -7  -5   5    2.22    0.77
  -7  -5   5    3.97    1.74
  -7   4  -5   13.13    2.64
  -7   4  -5   12.08    3.45
  -7   3  -5   15.25    3.76
  -7   3  -5    9.05    2.09
   7   2  -5   15.29    2.40
   7   2  -5   15.76    3.80
  -7  -2   5   16.39    2.49
  -7  -2   5   15.28    2.24
  -7  -2   5   17.42    2.10
   7   1  -5    9.66    1.85
   7   1  -5    8.54    2.82
  -7  -1   5   11.19    2.11
  -7  -1   5   11.52    1.99
  -7   1  -5   19.89    3.90
  -7  -1   5   13.05    1.89
   7   0  -5   -0.01    0.63
   7   0  -5   -0.23    1.27
   7   0   5    0.09    0.34
  -7   0  -5    0.33    0.63
  -7   0   5   -0.39    0.51
  -7   0   5    0.53    0.76
  -7   0  -5   -0.23    0.44
  -7   0   5    0.66    0.62
  -7   0  -5   -0.02    0.22
  -7   0  -5   -0.52    0.97
   7  -1  -5   12.62    0.96
   7  -1  -5   12.02    2.16
   7  -1  -5   11.48    3.29
  -7   1   5   12.10    2.15
  -7  -1  -5   18.00    2.20
  -7  -1  -5   15.70    3.68
  -7   1   5   10.21    1.87
   7  -2  -5   12.41    3.45
   7  -2  -5   12.63    2.17
  -7   2   5   15.57    2.17
   7  -3  -5    0.10    1.37
   7  -4  -5    0.77    1.52
   7   5   5    2.52    0.91
   7  -5  -5    1.28    2.01
  -7  -5  -5    2.75    1.32
  -7   5   5    3.25    1.35
   7  -6  -5    6.59    3.09
   7   6   5   11.14    1.88
  -7  -6  -5   10.11    2.37
  -7   6   5    9.04    2.14
   7  -7  -5    4.80    2.96
   7   7   5    0.62    0.77
  -7  -7  -5   -0.30    0.89
   7  -8  -5   22.47    5.94
  -8  -8   5    1.34    1.44
   8   7  -5    0.13    1.21
  -8   7  -5    2.41    2.38
  -8  -7   5    1.79    1.68
  -8  -7   5   -0.27    0.99
  -8  -6   5   71.17    6.65
  -8  -6   5   62.61    4.04
  -8  -6   5   65.99    5.00
   8   5  -5   15.30    4.23
   8   5  -5   12.13    2.44
  -8  -5   5   10.68    2.67
  -8  -5   5   11.85    2.34
  -8  -5   5   13.83    1.58
   8   4  -5    3.39    2.32
   8   4  -5    2.48    1.25
  -8  -4   5    3.98    1.69
  -8   4  -5    8.89    3.16
  -8  -4   5    2.25    1.12
  -8   4  -5    7.92    2.19
   8   3  -5    1.03    0.93
   8   3  -5    3.92    2.39
  -8  -3   5    2.22    1.14
  -8  -3   5    1.46    1.14
  -8   3  -5    0.61    1.03
  -8   3  -5    0.23    1.55
   8   2  -5   24.94    5.11
   8   2  -5   19.73    2.49
  -8  -2   5   22.14    2.82
  -8  -2   5   21.85    2.50
   8   1  -5    1.34    1.83
   8   1  -5    2.75    1.16
   8  -1   5    2.74    0.86
  -8   1  -5    3.62    0.96
  -8  -1   5    2.65    1.11
  -8  -1   5    2.63    1.15
  -8   1  -5    2.67    1.26
  -8   1  -5    3.05    2.09
   8   0  -5    0.70    1.67
   8   0   5    0.00    0.40
   8   0  -5   -0.37    0.66
  -8   0   5    0.06    0.64
  -8   0   5   -0.07    0.68
  -8   0  -5   -0.35    0.68
  -8   0   5    0.02    0.66
  -8   0  -5   -0.26    1.17
   8   1   5    3.08    0.84
   8  -1  -5    1.95    1.91
   8  -1  -5    1.67    0.44
   8  -1  -5    1.92    1.20
  -8   1   5    2.82    1.28
  -8  -1  -5    2.44    2.01
  -8   1   5    2.11    1.12
  -8  -1  -5    2.82    1.22
   8  -2  -5   21.97    1.36
   8  -2  -5   23.02    2.84
   8  -2  -5   23.49    5.23
  -8   2   5   24.24    2.90
  -8   2   5   20.70    2.46
   8  -3  -5    0.61    0.92
   8   3   5    0.00    0.42
   8  -3  -5    1.60    2.16
  -8   3   5    1.56    1.04
  -8  -3  -5    0.30    0.76
  -8   3   5    1.13    1.70
   8  -4  -5    3.03    1.48
   8  -4  -5    4.29    2.61
  -8   4   5    2.39    1.20
  -8  -4  -5    8.20    2.04
   8  -5  -5   13.73    4.14
  -8  -5  -5    1.83    1.28
   8   6   5   23.53    2.53
  -8  -6  -5   19.75    3.14
   8  -7  -5   -0.46    2.00
  -8  -7  -5    0.17    1.21
   8  -8  -5    1.67    2.83
  -8  -8  -5    2.99    2.13
   9   7  -5   -0.45    1.23
  -9  -7   5    1.86    1.46
   9   6  -5    1.86    1.39
  -9  -6   5    3.35    1.98
  -9  -6   5    3.60    1.00
  -9  -6   5    2.46    1.42
  -9   6  -5   14.21    4.62
   9   5  -5    1.78    1.31
  -9  -5   5    1.82    1.24
  -9   5  -5   18.15    4.84
  -9   5  -5   16.09    3.43
  -9  -5   5    2.61    1.70
   9   4  -5    5.95    1.83
   9   4  -5    4.14    2.76
  -9  -4   5    6.12    1.79
  -9  -4   5    8.38    2.28
  -9   4  -5    0.72    1.93
   9   3  -5    5.48    2.86
   9   3  -5    5.22    1.70
  -9  -3   5    6.89    1.88
  -9   3  -5    2.84    1.47
  -9  -3   5    6.22    1.86
  -9   3  -5    3.94    2.67
   9   2  -5    5.12    2.89
   9   2  -5    8.84    2.08
  -9  -2   5    7.56    1.89
  -9  -2   5    5.46    1.79
   9   1  -5    0.18    0.87
   9   1  -5    2.44    2.18
  -9   1  -5   -0.90    1.34
  -9  -1   5    1.02    0.92
  -9   1  -5    0.67    0.95
   9   0   5    0.02    0.46
   9   0  -5    2.36    2.15
   9   0  -5    0.06    0.78
  -9   0  -5    0.06    0.74
  -9   0   5    0.55    0.84
  -9   0  -5    0.26    1.37
   9  -1  -5    1.02    1.02
   9  -1  -5    0.33    1.79
   9  -1  -5    0.88    0.40
   9   1   5    0.71    0.66
  -9  -1  -5    1.72    1.08
  -9  -1  -5    0.95    1.82
  -9   1   5    1.71    1.09
   9  -2  -5    6.40    3.14
   9  -2  -5    7.23    0.75
   9  -2  -5    6.20    1.87
  -9   2   5    6.59    1.75
   9  -3  -5    6.08    3.14
   9  -3  -5    8.62    2.39
   9  -4  -5    8.29    2.43
   9  -4  -5    5.93    3.16
   9   5   5   17.43    2.26
  -9  -5  -5   21.61    3.18
   9  -6  -5    1.43    2.31
  -9  -6  -5   13.67    3.09
   9  -7  -5    2.65    3.11
  -9  -7  -5    2.30    1.56
 -10  -7   5    3.96    1.87
  10   6  -5    1.07    1.40
 -10  -6   5   -0.59    1.04
  10   5  -5   16.08    3.09
 -10  -5   5   18.14    3.09
 -10   5  -5    8.94    2.81
 -10   5  -5    9.93    4.17
 -10  -5   5   17.61    1.84
 -10   4  -5    9.18    3.68
 -10   4  -5   10.20    2.81
 -10  -4   5    0.53    1.09
  10   3  -5    1.72    2.26
  10   3  -5    0.21    0.92
 -10  -3   5    0.26    1.12
 -10   3  -5    0.36    1.09
 -10   3  -5    0.08    1.92
  10   2  -5    2.44    1.32
  10   2  -5    2.41    2.42
 -10   2  -5    7.43    3.49
 -10  -2   5    1.91    1.24
 -10   2  -5    8.50    2.33
  10   1  -5   13.20    2.71
  10   1  -5   17.94    4.82
 -10  -1   5   13.27    2.52
  10   0  -5   -1.49    1.38
  10   0  -5   -0.37    0.80
 -10   0  -5    0.23    0.95
 -10   0  -5    0.75    1.91
 -10   0   5    0.33    0.86
  10  -1  -5   12.92    2.71
  10  -1  -5   14.70    1.27
  10  -1  -5   13.20    4.52
 -10   1   5   15.95    2.71
  10  -2  -5    2.47    1.56
  10  -2  -5    1.52    2.44
  10  -2  -5    1.93    0.55
 -10  -2  -5    9.08    2.33
 -10   2   5    0.49    1.07
  10  -3  -5   -0.31    1.12
  10  -3  -5    0.20    2.05
 -10   3   5    0.05    0.91
 -10  -3  -5   -0.44    0.82
  10  -4  -5   -0.01    2.28
  10  -4  -5    0.29    1.23
 -10  -4  -5    6.27    2.06
  10  -5  -5   17.81    5.63
 -10  -5  -5   11.85    2.93
  10  -6  -5    0.58    2.67
 -10  -6  -5    3.26    1.83
 -11  -6   5    1.44    1.48
  11   5  -5   10.86    2.67
 -11  -5   5   11.90    2.62
 -11  -5   5   12.11    1.60
  11   4  -5    0.88    1.26
 -11  -4   5    0.51    1.17
 -11   4  -5    0.06    1.30
 -11   4  -5    1.52    2.60
  11   3  -5    1.39    1.37
 -11  -3   5    2.01    1.40
 -11   3  -5    2.47    2.65
 -11   3  -5    2.95    1.89
  11   2  -5    0.79    1.10
  11   2  -5    0.00    2.19
 -11   2  -5    2.71    1.68
 -11  -2   5    0.17    1.04
 -11   2  -5    1.27    2.32
  11   1  -5    7.28    3.75
  11   1  -5    3.54    1.76
 -11  -1   5    8.03    2.16
 -11   1  -5   14.81    3.19
 -11   1  -5   10.72    4.49
  11   0  -5    0.65    1.99
  11   0  -5    0.14    1.00
 -11   0  -5    0.09    1.02
 -11   0   5   -0.39    0.98
 -11   0  -5   -0.46    1.94
  11  -1  -5    7.12    3.77
  11  -1  -5    5.81    2.06
 -11  -1  -5   10.23    2.61
 -11   1   5    7.07    2.12
  11  -2  -5    1.63    1.29
  11  -2  -5    0.80    2.47
 -11  -2  -5    2.58    1.55
 -11   2   5   -0.76    0.91
  11  -3  -5    1.26    2.46
  11  -3  -5    0.61    1.35
 -11   3   5    1.46    1.37
 -11  -3  -5    1.30    1.28
  11  -4  -5    2.22    3.17
  11  -4  -5    1.54    1.70
 -11   4   5    2.07    1.47
 -11  -4  -5    1.05    1.33
  11  -5  -5   12.25    5.19
  11  -6  -5    4.24    3.70
  12   4  -5    3.67    1.97
 -12  -4   5    2.72    0.98
 -12  -4   5    2.68    1.64
  12   3  -5    4.24    2.00
 -12   3  -5    0.86    1.48
 -12  -3   5    5.99    2.02
  12   2  -5    1.18    1.28
 -12  -2   5    0.89    1.22
 -12   2  -5    0.18    1.34
 -12   2  -5   -0.05    2.29
  12   1  -5    0.07    1.23
  12   1  -5   -0.33    2.22
 -12   1  -5    3.89    3.47
 -12   1  -5    4.66    2.10
  12   0  -5    0.28    1.21
  12   0  -5    0.86    2.34
 -12   0  -5   -0.05    1.23
 -12   0   5   -1.03    1.06
  12  -1  -5    1.25    2.98
  12  -1  -5    0.84    1.50
 -12  -1  -5    4.97    1.97
 -12   1   5    0.04    1.12
  12  -2  -5    0.21    1.35
  12  -2  -5    2.53    3.04
 -12  -2  -5    1.30    1.36
 -12   2   5   -0.68    1.02
  12  -3  -5    3.38    2.09
  12  -3  -5    6.50    4.08
 -12   3   5    5.70    2.25
  12  -4  -5    4.39    3.77
 -12  -4  -5    1.94    1.67
 -12   4   5    3.03    1.78
 -13  -3   5    0.85    1.51
  13   2  -5    1.39    1.87
 -13  -2   5    0.46    1.41
  13   1  -5    0.40    1.45
 -13   1  -5    0.66    1.48
 -13  -1   5   -0.52    1.30
  13   0  -5   -0.82    2.52
  13   0  -5   -0.89    1.37
 -13   0   5   -0.25    1.32
 -13   0  -5   -0.02    1.18
  13  -1  -5    1.86    3.06
  13  -1  -5    0.34    1.54
 -13   1   5    0.70    1.45
 -13  -1  -5   -0.26    1.36
  13  -2  -5    3.83    3.86
 -13   2   5    0.71    1.37
  13  -3  -5   -0.96    2.73
 -13   3   5   -0.44    1.44
   0   9  -6    0.73    1.66
   0  -8   6   17.03    4.33
   0   8  -6   19.20    4.29
   0  -8   6   19.56    2.03
   0  -7   6    0.42    0.84
   0  -7   6    0.05    1.20
   0  -7   6    0.97    0.67
   0   7  -6    1.24    1.33
   0   7  -6    1.19    1.52
   0   6  -6    8.57    2.42
   0  -6   6    9.71    2.65
   0   6  -6    8.45    2.52
   0  -6   6    9.63    1.91
   0  -6   6    9.82    1.32
   0  -5   6    0.42    0.63
   0   5  -6    0.83    1.06
   0  -5   6    0.50    0.42
   0   5  -6    0.41    0.31
   0  -5   6    1.04    1.07
   0   5  -6    0.45    0.84
   0  -5   6    0.50    0.66
   0  -4   6   54.86    3.41
   0   4  -6   47.11    4.55
   0  -4   6   51.26    4.56
   0   4  -6   49.43    4.71
   0  -4   6   54.90    3.16
   0   4  -6   54.26    2.81
   0  -4   6   55.50    3.84
   0  -3   6   10.36    1.97
   0   3  -6   10.69    2.09
   0  -3   6   11.19    1.31
   0  -3   6   11.22    0.99
   0  -3   6   11.28    1.26
   0  -3   6    9.26    1.16
   0  -3   6   10.01    0.98
   0   3  -6    9.53    1.94
   0  -3   6   11.38    1.26
   0  -2   6    5.61    0.90
   0  -2   6    6.54    0.81
   0   2  -6    6.31    1.04
   0   2  -6    5.78    1.38
   0  -2   6    6.24    0.86
   0   2  -6    7.31    1.52
   0  -2   6    7.26    1.42
   0  -2   6    6.96    0.66
   0   1  -6    3.29    0.73
   0   1  -6    4.33    1.04
   0  -1   6    3.22    0.61
   0   1  -6    4.21    1.06
   0   1  -6    2.14    0.57
   0  -1   6    3.57    0.52
   0  -1   6    3.60    0.50
   0  -1   6    3.75    0.38
   0   0   6   99.23    4.36
   0   0  -6  100.93    4.64
   0   0  -6   98.10    6.04
   0   0  -6   96.12    5.69
   0   0  -6  101.38    5.49
   0   0  -6   96.41    5.48
   0  -1  -6    3.70    0.74
   0  -1  -6    3.93    0.78
   0   1   6    4.06    0.57
   0  -1  -6    3.59    0.63
   0  -2  -6    7.05    0.92
   0  -2  -6    6.34    0.79
   0  -3  -6   11.14    1.22
   0  -3  -6   11.71    1.06
   0  -3  -6   11.22    1.09
   0   4   6   53.49    3.14
   0  -4  -6   54.40    3.63
   0   4   6   51.94    3.12
   0   5   6    0.56    0.44
   0   5   6    0.60    0.42
   0  -5  -6    0.20    0.57
   0   6   6    9.56    1.38
   0  -6  -6   10.06    2.08
   0   7   6    1.56    0.76
   0  -7  -6    0.37    0.92
   0   8   6   19.97    2.50
   0  -8  -6   21.83    3.45
   0  -9  -6    0.55    1.29
   0   9   6    0.35    0.77
   1   9  -6    0.99    1.91
   1   9  -6    1.18    1.29
  -1   9  -6    2.04    2.20
   1   8  -6    0.81    1.49
   1  -8   6    2.67    2.10
  -1  -8   6   -0.49    1.17
  -1   8  -6    2.32    1.92
  -1  -8   6    1.19    1.16
  -1  -8   6    1.16    0.70
   1  -7   6    0.53    1.27
   1  -7   6    0.43    0.57
   1   7  -6   -0.08    1.07
   1   7  -6    0.03    1.16
  -1   7  -6   -0.13    0.98
  -1   7  -6   -0.14    1.16
  -1  -7   6    1.17    0.69
  -1  -7   6    1.47    1.06
  -1  -7   6    0.73    1.18
   1  -6   6    4.46    2.04
   1   6  -6   11.37    2.72
   1  -6   6    2.89    1.18
   1  -6   6    2.22    0.82
   1   6  -6   10.87    2.65
  -1   6  -6    3.31    1.62
  -1   6  -6    4.04    1.85
  -1  -6   6   10.13    2.53
   1   5  -6    8.15    2.20
   1   5  -6    8.27    2.19
  -1  -5   6    7.92    2.10
  -1  -5   6    8.23    1.51
   1  -2   6    8.74    0.72
   1  -2   6    7.21    0.87
   1   2  -6    5.72    1.36
   1  -2   6    8.10    0.93
   1  -2   6    8.70    0.95
   1   2  -6    7.59    1.22
   1  -2   6    7.59    1.57
   1   2  -6    5.37    1.47
   1  -2   6    7.31    0.70
  -1  -2   6    6.66    1.04
  -1  -2   6    7.17    1.37
  -1   2  -6    8.92    1.42
  -1  -2   6    6.25    0.81
  -1   2  -6    8.09    1.66
  -1  -2   6    5.77    0.89
  -1  -2   6    5.89    0.66
  -1   0  -6    9.38    1.34
   1  -2  -6    5.84    0.60
   1  -2  -6    7.57    1.14
   1  -2  -6    6.17    0.86
   1  -2  -6    6.16    0.79
  -1  -2  -6    8.28    0.58
  -1  -2  -6    7.82    0.96
  -1  -2  -6    7.46    0.70
   1  -4  -6   95.47    6.14
  -1   4   6   96.71    5.68
  -1   4   6   98.65    5.32
  -1   4   6  103.02    5.45
   1  -5  -6   10.62    2.03
   1   6   6    3.46    0.96
   1   6   6    2.92    0.89
  -1  -6  -6    2.03    1.01
   1   7   6   -0.15    0.50
   1  -7  -6    0.67    0.94
  -1   7   6    0.48    0.58
  -1  -7  -6   -0.44    0.70
   1  -8  -6    1.05    1.44
   1   8   6    4.29    1.27
  -1  -8  -6    1.61    1.38
  -1   8   6    0.60    0.80
  -1   8   6    1.19    0.87
   1   9   6    1.63    1.02
   1  -9  -6    0.59    1.60
  -1   9   6    1.10    0.99
  -1  -9  -6    1.15    1.34
   2   9  -6    2.94    2.32
   2   9  -6    5.35    2.04
  -2   9  -6    0.58    1.88
  -2  -9   6    9.74    2.52
   2  -8   6    0.05    1.56
   2   8  -6    0.81    1.09
   2   8  -6    0.39    1.48
  -2  -8   6    0.56    0.97
  -2   8  -6    0.82    1.60
  -2  -8   6    1.78    0.80
  -2  -8   6    0.80    1.40
   2   7  -6    8.94    2.76
   2   7  -6   14.52    3.52
   2   7  -6   14.62    2.60
   2  -7   6   21.33    4.75
  -2  -7   6   15.58    1.73
  -2   7  -6   24.91    4.03
  -2  -7   6   13.98    2.53
  -2  -7   6   10.43    2.97
   2  -6   6    5.57    1.16
   2   6  -6    6.77    2.33
   2  -6   6    7.46    2.70
   2   6  -6    6.44    2.20
   2   6  -6    4.02    1.28
  -2  -6   6    5.77    1.12
  -2   6  -6    5.18    1.92
  -2  -6   6    5.55    1.99
  -2   6  -6    5.76    2.19
  -2  -6   6    3.59    1.28
   2   5  -6   14.95    1.92
   2   5  -6   11.61    2.61
   2   5  -6   11.78    2.91
   2   5  -6   14.64    1.27
  -2  -5   6   14.70    1.82
  -2  -5   6   11.45    1.36
  -2  -5   6   12.53    2.52
   2   4  -6   29.61    3.62
   2   4  -6   30.82    2.59
   2   4  -6   30.33    1.88
  -2  -4   6   27.51    3.03
  -2  -4   6   32.66    2.84
  -2  -4   6   25.17    2.31
  -2  -4   6   32.14    2.12
   2   2  -6    4.33    0.45
   2   2  -6    4.85    1.48
   2   2  -6    3.28    0.82
  -2  -2   6    4.30    0.77
  -2  -2   6    4.39    0.91
  -2  -2   6    5.26    1.15
  -2  -2   6    3.74    0.82
   2  -2  -6    4.92    1.14
   2  -2  -6    4.63    0.65
   2  -2  -6    5.12    1.02
   2  -2  -6    4.71    0.83
   2  -2  -6    5.12    1.18
  -2   2   6    4.50    0.43
  -2   2   6    4.20    0.52
   2  -5  -6   12.20    2.37
   2  -6  -6    6.07    1.95
   2   6   6    5.76    1.15
  -2   6   6    6.04    1.31
  -2  -6  -6    6.22    1.61
   2  -7  -6   11.59    2.93
  -2   7   6   14.92    2.06
   2  -8  -6    0.54    1.57
   2   8   6    0.50    0.65
  -2  -8  -6   -0.08    0.90
  -2   8   6    2.46    1.11
   2  -9  -6    6.62    2.84
  -2   9   6    6.24    1.82
  -2   9   6    7.56    2.04
   3   9  -6    2.68    1.72
   3   9  -6    3.83    2.39
  -3  -9   6    4.53    1.83
  -3   9  -6    1.82    2.23
   3   8  -6    0.94    1.77
   3   8  -6   -0.35    0.97
  -3  -8   6    0.07    1.15
  -3  -8   6    1.13    1.13
  -3  -8   6    0.51    0.65
  -3   8  -6    9.29    3.40
   3  -7   6   12.14    3.67
   3   7  -6   12.38    3.18
   3   7  -6   11.36    3.28
   3   7  -6   16.73    2.83
  -3   7  -6   15.56    3.52
  -3  -7   6   13.30    1.65
  -3  -7   6   13.71    2.54
  -3   7  -6   16.03    3.96
  -3  -7   6   13.75    3.33
   3  -6   6    0.77    1.36
   3   6  -6    4.77    2.11
   3   6  -6    6.04    1.58
  -3  -6   6    3.93    1.72
  -3   6  -6    0.71    1.23
  -3  -6   6    3.40    1.21
  -3  -6   6    4.33    0.98
   3   5  -6    6.43    1.50
   3   5  -6    5.38    2.13
  -3  -5   6    7.27    1.99
  -3  -5   6    6.86    1.16
  -3  -5   6    6.22    1.47
   3   4  -6    0.28    0.29
   3  -4   6    1.70    1.34
   3   4  -6    0.39    0.53
   3  -4   6    1.77    0.71
   3   4  -6   -0.36    0.81
   3  -4   6    0.81    0.51
  -3  -4   6    0.26    0.63
  -3   4  -6    1.12    1.13
  -3  -4   6   -0.47    0.43
  -3   4  -6    1.94    1.08
  -3  -4   6    0.43    0.65
   3  -3   6   82.70    4.78
   3  -3   6   88.51    5.44
   3  -3   6   86.94    4.56
   3   3  -6   93.45    4.45
   3   3  -6   97.86    7.26
   3  -3   6   76.02    6.68
   3   3  -6  111.35    5.47
  -3  -3   6  104.34    5.15
  -3  -3   6  105.46    5.99
  -3   3  -6   83.97    7.03
  -3  -3   6  105.28    6.39
  -3   3  -6   86.63    6.33
   3  -2   6    3.19    0.64
   3  -2   6    3.05    1.19
   3  -2   6    3.45    0.74
   3  -2   6    2.26    1.11
   3  -2   6    3.18    0.81
  -3   2  -6    3.13    1.03
  -3   2  -6    3.94    0.85
  -3   2  -6    3.16    1.27
   3   2   6    3.35    0.63
  -3  -2  -6    3.04    0.73
  -3  -2  -6    3.82    0.78
  -3  -2  -6    2.55    1.27
  -3  -2  -6    4.31    1.20
   3   3   6   83.67    5.23
   3  -3  -6  111.36    6.95
   3   3   6   88.15    4.20
   3   3   6   83.86    4.98
   3  -3  -6  104.34    5.54
  -3  -3  -6   85.94    5.48
  -3   3   6  108.81    5.61
  -3   3   6  106.42    5.13
   3   4   6    1.05    0.43
   3   4   6    0.96    0.56
   3  -4  -6    0.31    0.78
  -3   4   6    0.01    0.28
  -3   4   6   -0.01    0.36
  -3  -4  -6    0.87    0.57
   3  -5  -6    5.59    1.88
  -3   5   6    6.82    1.42
   3  -6  -6    4.15    1.97
  -3   6   6    6.43    1.44
   3   7   6   15.03    1.91
   3  -7  -6   15.53    3.73
  -3  -7  -6   16.91    2.61
  -3   7   6   15.87    2.26
   3   8   6    6.65    1.55
  -3  -8  -6    4.92    1.83
   3   9   6    1.56    1.02
   3  -9  -6    4.43    2.66
  -3   9   6    4.84    1.65
  -3  -9  -6    1.32    1.47
  -4  -9   6   -0.24    1.23
   4   8  -6    6.57    2.19
   4   8  -6   11.37    3.50
  -4  -8   6   10.46    3.33
  -4  -8   6   13.18    2.72
  -4  -8   6   11.93    1.59
   4   7  -6   11.43    2.49
   4   7  -6   10.06    2.99
  -4   7  -6    5.00    2.65
  -4  -7   6    8.61    2.75
  -4  -7   6   10.87    1.45
  -4  -7   6   11.44    2.29
  -4   7  -6    6.32    2.30
   4   6  -6    6.85    1.76
   4   6  -6    4.95    2.30
   4  -6   6    9.13    3.35
  -4   6  -6    7.66    2.68
  -4  -6   6    5.45    1.15
  -4  -6   6    7.02    1.69
  -4   6  -6    6.35    2.06
  -4  -6   6    6.59    2.11
   4   5  -6    1.92    1.01
   4   5  -6    2.21    1.68
   4  -5   6    0.68    1.38
  -4  -5   6    3.06    1.37
  -4   5  -6    0.64    1.27
  -4  -5   6    2.34    0.72
  -4   5  -6    0.10    0.85
  -4  -5   6    2.39    1.01
   4   4  -6   14.31    3.27
   4   4  -6   12.54    1.19
   4   4  -6   11.37    1.88
  -4  -4   6   12.47    1.96
  -4  -4   6   15.28    2.24
  -4  -4   6   14.80    2.10
   4  -3   6   34.55    3.83
   4   3  -6   25.52    2.40
   4   3  -6   24.57    1.72
   4   3  -6   24.24    3.60
   4  -3   6   33.87    3.75
  -4  -3   6   25.31    2.75
  -4   3  -6   35.46    3.23
  -4   3  -6   35.39    3.90
  -4  -3   6   28.24    2.73
  -4  -3   6   23.36    2.22
   4   2  -6    2.21    1.33
   4   2  -6    2.00    0.59
   4  -2   6    6.21    1.77
   4   2  -6    0.20    0.40
   4   2  -6    1.53    0.40
  -4  -2   6    1.65    0.80
  -4  -2   6    2.42    0.80
  -4  -2   6    1.14    0.68
  -4   2  -6    4.74    1.71
  -4   2  -6    5.16    1.35
   4  -2  -6    1.34    0.46
   4  -2  -6    1.55    0.77
   4  -2  -6    2.49    1.28
  -4  -2  -6    5.96    1.93
  -4   2   6    2.06    0.74
  -4   2   6    0.90    0.37
   4   3   6   36.61    2.59
   4  -3  -6   26.25    3.36
   4  -3  -6   29.81    2.71
   4   3   6   37.45    2.20
  -4   3   6   26.99    2.08
  -4  -3  -6   38.74    2.70
  -4   3   6   24.04    2.44
   4  -4  -6   13.00    2.89
   4  -4  -6   15.42    3.02
   4  -4  -6   12.50    2.15
  -4   4   6   12.93    1.68
   4   5   6    0.38    0.40
   4  -5  -6    2.26    1.43
  -4   5   6    1.65    0.80
  -4  -5  -6    0.78    0.67
   4  -6  -6    3.37    1.90
  -4  -6  -6    6.95    1.70
  -4   6   6    4.46    1.31
   4   7   6    6.06    1.38
   4  -7  -6    9.29    3.16
  -4   7   6    9.99    2.07
  -4  -7  -6    6.88    2.03
   4  -8  -6    8.93    3.42
  -4   8   6   13.97    2.63
   4   9   6    0.32    0.79
   4  -9  -6   -1.08    1.77
  -4  -9  -6    0.56    1.32
  -5  -9   6    8.38    2.46
   5   8  -6    0.29    1.48
   5   8  -6   -0.47    0.96
  -5  -8   6    0.21    0.59
  -5   8  -6    3.36    2.42
  -5  -8   6   -1.09    0.90
  -5  -8   6    0.63    1.35
   5   7  -6   31.83    3.66
  -5  -7   6   34.23    2.64
  -5  -7   6   31.59    4.42
  -5  -7   6   32.79    3.41
   5   6  -6   -0.10    0.71
   5   6  -6   -0.38    1.18
  -5  -6   6   -0.38    0.81
  -5  -6   6   -0.32    0.75
  -5   6  -6    7.48    2.49
  -5   6  -6    8.04    2.88
   5  -5   6    2.34    1.88
   5   5  -6    6.43    2.50
   5  -5   6    1.72    1.71
   5   5  -6    3.67    1.28
  -5   5  -6    1.59    1.65
  -5  -5   6    3.32    0.87
  -5   5  -6    3.98    1.66
  -5  -5   6    2.74    1.19
  -5  -5   6    3.79    1.55
   5  -4   6    6.58    2.43
   5  -4   6    3.05    1.86
   5   4  -6    6.83    1.53
   5   4  -6    6.72    1.00
   5   4  -6    6.91    2.39
  -5  -4   6    7.93    1.61
  -5  -4   6    7.64    1.91
  -5   4  -6    7.14    1.93
  -5   4  -6    4.86    2.06
   5  -3   6    6.24    2.17
   5  -3   6    6.98    1.28
   5  -3   6    5.58    1.10
  -5   3  -6    7.17    1.29
  -5   3  -6    6.18    1.73
  -5   3  -6    5.03    1.95
   5   2  -6   55.95    5.65
   5   2  -6   58.48    3.92
   5   2  -6   56.03    3.46
  -5  -2   6   55.33    4.19
  -5  -2   6   57.03    4.26
  -5  -2   6   49.17    3.51
   5   1  -6   29.95    1.89
   5   1  -6   30.01    3.84
   5  -1   6   24.23    1.97
   5  -1   6   22.67    1.80
  -5  -1   6   29.31    2.40
  -5   1  -6   23.03    3.37
  -5  -1   6   29.44    2.50
  -5   1  -6   21.53    2.45
  -5   1  -6   23.41    1.96
  -5  -1   6   28.74    2.63
   5  -1  -6   29.70    3.75
   5   1   6   23.90    1.82
   5  -1  -6   26.65    2.47
   5   1   6   23.90    2.23
   5  -1  -6   27.15    1.79
  -5  -1  -6   26.66    3.57
  -5   1   6   28.27    2.34
  -5  -1  -6   24.16    1.91
  -5  -1  -6   21.28    2.22
  -5   1   6   27.14    2.18
  -5   1   6   27.03    2.46
  -5   1   6   26.21    1.89
   5  -3  -6    0.42    1.10
   5  -3  -6    0.44    0.67
  -5  -3  -6    6.29    1.31
   5  -4  -6    8.67    2.62
   5  -4  -6    8.50    1.88
   5   4   6    6.64    0.99
  -5   4   6    9.32    1.71
  -5  -4  -6    6.94    1.50
   5   5   6    2.86    0.82
   5  -5  -6    2.34    1.77
   5  -5  -6    3.31    1.88
  -5  -5  -6    4.11    1.30
  -5   5   6    3.35    1.17
   5   6   6    6.40    1.27
   5  -6  -6    0.48    1.30
  -5  -6  -6    8.15    1.91
   5  -7  -6   29.25    5.70
  -5   7   6   35.77    3.63
   5   8   6    1.32    0.88
   5  -8  -6   -0.20    1.66
  -5  -8  -6    1.88    1.48
  -5   8   6    0.41    0.99
   5  -9  -6   13.33    4.54
   5  -9  -6    9.73    3.94
  -6  -9   6    0.63    1.45
   6   8  -6    0.44    1.35
  -6   8  -6    6.71    3.34
  -6  -8   6    0.82    1.31
  -6  -8   6    0.67    0.69
   6   7  -6   42.12    4.33
  -6  -7   6   46.49    5.46
  -6  -7   6   44.19    3.15
  -6  -7   6   45.13    4.08
   6   6  -6    3.32    1.54
   6   6  -6    6.39    2.81
  -6  -6   6    4.66    2.01
  -6   6  -6   10.01    2.84
  -6  -6   6    5.66    1.23
  -6   6  -6    8.09    3.08
  -6  -6   6    3.32    1.36
   6   5  -6    8.69    2.01
   6   5  -6    7.17    2.85
  -6  -5   6    8.28    1.33
  -6  -5   6    7.99    1.83
  -6  -5   6    7.48    2.26
   6   4  -6   21.01    4.36
   6   4  -6   19.96    2.52
  -6   4  -6   24.82    4.07
  -6   4  -6   29.98    3.46
  -6  -4   6   18.26    2.75
  -6  -4   6   22.06    2.42
   6   3  -6   11.49    2.07
   6   3  -6    9.93    2.96
  -6   3  -6   17.76    2.45
  -6  -3   6    9.91    2.04
  -6  -3   6   10.60    2.06
  -6   3  -6   16.24    3.58
  -6  -3   6   10.40    1.77
   6   2  -6   16.68    2.09
   6  -2   6   14.53    1.66
   6   2  -6   19.06    4.00
   6   2  -6   17.05    1.40
  -6  -2   6   17.09    2.00
  -6   2  -6   13.65    2.19
  -6   2  -6   13.72    1.50
  -6   2  -6   13.52    3.24
  -6  -2   6   16.99    2.27
  -6  -2   6   16.66    2.11
   6   1  -6   28.27    4.13
  -6  -1   6   24.93    2.44
   6   0  -6   18.68    2.13
   6   0  -6   16.21    3.64
   6   0  -6   18.54    1.33
  -6   0   6   18.11    1.98
  -6   0   6   20.26    2.32
  -6   0   6   20.37    2.07
   6  -1  -6   19.49    3.81
   6  -2  -6   20.26    3.96
   6   2   6   13.33    1.36
   6  -2  -6   15.47    2.37
  -6  -2  -6   13.47    1.35
  -6   2   6   15.57    2.04
  -6  -2  -6   14.80    3.54
  -6  -2  -6   13.39    1.80
   6  -3  -6   12.46    2.23
   6  -3  -6    8.75    2.88
   6   3   6   16.14    1.51
  -6   3   6   12.16    2.12
  -6  -3  -6   16.60    2.03
   6  -4  -6   19.94    4.31
   6  -4  -6   21.01    2.69
   6   4   6   26.84    2.18
  -6  -4  -6   24.84    2.60
  -6   4   6   18.88    2.48
   6  -5  -6    6.58    2.62
  -6   5   6    7.26    1.73
   6  -6  -6    3.63    2.34
   6   6   6    8.68    1.54
  -6   6   6    4.37    1.50
  -6  -6  -6    7.83    1.93
   6  -7  -6   42.33    6.40
   6  -7  -6   51.09    6.67
  -6   7   6   50.24    4.62
   6   8   6    8.96    1.86
   6  -8  -6    1.52    2.16
  -6  -8  -6    7.15    2.46
  -7  -8   6    0.58    1.21
   7   7  -6    5.58    2.10
  -7   7  -6    3.69    2.76
  -7  -7   6    4.58    1.10
  -7  -7   6    2.98    1.42
   7   6  -6    8.48    2.26
   7   6  -6   12.74    3.92
  -7   6  -6    4.07    2.60
  -7  -6   6   10.06    2.15
  -7  -6   6    8.98    1.49
  -7  -6   6    9.76    2.77
  -7   6  -6    5.76    2.27
   7   5  -6    1.31    1.16
   7   5  -6    1.69    2.04
  -7  -5   6    2.25    1.29
  -7   5  -6   -0.49    1.45
  -7  -5   6    2.14    1.38
  -7  -5   6    2.53    0.84
  -7   5  -6    0.80    1.13
   7   4  -6    2.33    1.94
  -7   4  -6   10.26    2.39
  -7   4  -6   14.99    3.92
   7   3  -6   -0.07    0.74
   7   3  -6   -0.31    1.31
  -7  -3   6   -0.08    0.71
  -7   3  -6    1.95    0.73
  -7   3  -6    2.53    1.25
  -7   3  -6    1.45    1.66
  -7  -3   6    1.03    0.88
   7   2  -6    3.14    1.25
   7   2  -6    2.37    1.93
  -7  -2   6    3.54    1.27
  -7   2  -6    0.03    0.70
  -7   2  -6    0.10    1.36
  -7  -2   6    1.17    0.94
  -7  -2   6    3.01    1.19
   7  -2  -6    1.34    0.97
   7  -2  -6    2.52    1.98
  -7   2   6    3.08    1.18
  -7  -2  -6    0.13    1.25
  -7   2   6    3.91    1.35
  -7  -2  -6    0.02    0.54
   7   3   6    1.60    0.64
   7  -3  -6    0.27    1.43
   7  -3  -6    0.33    0.72
  -7  -3  -6    1.92    1.00
  -7   3   6    0.48    0.74
   7  -4  -6    1.39    1.80
   7  -5  -6    3.13    2.41
  -7   5   6    2.55    1.23
   7   6   6    4.35    1.26
   7  -6  -6    8.51    3.39
  -7  -6  -6    4.82    1.71
  -7   6   6   12.18    2.43
   7  -7  -6    4.86    2.99
   7   7   6    2.82    1.12
  -7  -7  -6    4.28    1.84
   7  -8  -6   -1.10    1.92
  -7  -8  -6    0.51    1.36
  -8  -8   6    2.96    1.68
   8   7  -6    0.42    1.32
  -8  -7   6    1.18    1.32
  -8  -7   6    1.23    0.74
  -8   7  -6    8.32    3.60
   8   6  -6    6.33    2.09
  -8  -6   6    5.59    1.76
  -8  -6   6    6.81    1.33
  -8   6  -6    3.05    1.89
  -8   6  -6    2.09    2.36
   8   5  -6    0.55    1.08
   8   5  -6    1.77    1.91
  -8   5  -6   -0.13    1.55
  -8   5  -6   -0.41    0.99
  -8  -5   6    1.41    1.39
  -8  -5   6    1.17    0.71
  -8  -5   6    1.44    1.12
   8   4  -6    3.62    1.50
   8   4  -6    4.05    2.61
  -8  -4   6    2.01    1.22
  -8   4  -6    9.83    2.47
  -8  -4   6    3.95    1.67
  -8   4  -6   11.24    3.72
   8   3  -6    1.30    1.99
  -8   3  -6   19.52    4.71
   8   1  -6    9.93    3.43
   8   1  -6    8.52    1.94
  -8  -1   6    9.91    2.03
   8   0  -6   90.73    8.69
   8   0  -6   75.87    5.52
  -8   0   6   85.72    6.21
  -8   0   6   79.49    5.26
   8  -1  -6    8.49    3.05
   8  -1  -6    8.08    2.01
  -8   1   6    9.24    2.20
  -8   1   6    8.10    1.87
   8  -4  -6    2.76    1.50
   8  -4  -6    5.67    2.93
  -8   4   6    3.37    1.43
   8  -5  -6    2.49    2.30
   8   5   6    0.62    0.66
  -8  -5  -6    0.77    1.01
  -8   5   6    1.20    1.13
   8  -6  -6    7.02    3.32
   8   6   6    2.18    0.98
  -8  -6  -6    1.30    1.15
   8  -7  -6    0.76    2.11
  -8  -7  -6    7.58    2.29
   8  -8  -6    3.87    3.19
  -9  -7   6    1.56    1.35
  -9  -6   6   15.78    2.92
   9   5  -6   13.92    2.95
  -9  -5   6   16.56    1.85
  -9  -5   6   15.66    2.93
   9   4  -6    7.63    2.08
   9   4  -6    6.98    3.34
  -9  -4   6    6.90    1.96
  -9   4  -6   13.70    4.44
  -9   4  -6    7.37    2.36
   9   3  -6    1.88    2.33
   9   3  -6    1.88    1.29
  -9  -3   6    3.53    1.42
  -9   3  -6   12.34    4.08
   9   2  -6    7.08    3.31
   9   2  -6    4.18    1.57
  -9  -2   6    4.33    1.49
  -9   2  -6    3.36    2.52
  -9   2  -6    2.81    1.50
   9   1  -6    0.74    1.82
   9   1  -6    1.21    1.12
  -9   1  -6   10.19    2.37
  -9  -1   6    0.65    0.90
  -9   1  -6    7.21    3.09
   9   0   6   35.17    2.96
  -9   0  -6   36.35    5.72
  -9   0  -6   34.48    3.88
   9   1   6   10.75    1.57
   9  -1  -6    2.02    2.09
   9  -1  -6    1.84    1.23
  -9  -1  -6   10.77    3.73
  -9  -1  -6   10.78    2.33
   9  -2  -6    5.33    1.80
   9   2   6    1.85    0.84
   9  -2  -6    3.15    2.50
  -9   2   6    2.79    1.31
  -9  -2  -6    1.67    1.18
   9  -3  -6    2.24    1.43
   9  -3  -6    1.17    2.39
  -9   3   6    1.26    1.08
  -9  -3  -6    9.03    2.12
   9   4   6    7.64    1.58
   9  -4  -6    8.63    2.36
   9  -4  -6    5.83    3.37
  -9  -4  -6    6.06    1.87
   9  -5  -6   18.67    5.36
   9  -6  -6   18.54    5.43
   9  -7  -6   -0.47    2.37
  -9  -7  -6    0.20    1.22
  10   6  -6    1.81    1.62
 -10  -6   6    1.33    0.86
 -10  -6   6    1.84    1.53
  10   5  -6    3.03    1.66
 -10  -5   6    2.27    0.92
 -10  -5   6    2.16    1.54
 -10   5  -6    1.10    2.67
 -10   5  -6    2.51    1.82
  10   4  -6   16.75    5.10
  10   4  -6   18.78    3.39
 -10  -4   6   19.99    3.21
 -10   3  -6   23.68    5.95
 -10   2  -6    4.93    2.00
 -10   2  -6    3.50    2.81
  10   1  -6   14.26    4.53
  10   1  -6   10.67    2.45
 -10  -1   6   13.75    2.57
  10   0  -6    1.76    2.39
  10   0  -6    0.59    1.10
 -10   0   6    1.62    1.21
 -10   0  -6    0.06    0.97
 -10   0  -6    0.91    2.03
  10  -1  -6   16.67    3.06
  10  -1  -6   14.59    4.86
 -10   1   6   10.94    2.26
  10  -2  -6   -0.44    0.95
  10  -2  -6    0.33    2.15
 -10  -2  -6    6.31    1.96
 -10   2   6   -0.45    1.01
  10  -3  -6    0.78    2.15
  10  -4  -6   18.34    5.47
  10  -4  -6   19.98    3.64
 -10   4   6   16.78    2.97
  10  -5  -6    4.27    3.23
 -10  -5  -6    0.70    1.18
  10  -6  -6    1.92    3.02
 -10  -6  -6    0.13    1.26
  11   5  -6    0.40    1.34
 -11  -5   6    2.02    1.60
 -11  -5   6    1.33    0.85
  11   4  -6    3.66    1.76
 -11  -4   6    3.25    1.70
 -11   4  -6    2.46    1.74
  11   3  -6    0.12    1.09
  11   3  -6   -0.65    2.32
 -11  -3   6    0.01    1.17
 -11   3  -6    4.60    2.15
 -11   3  -6    1.65    2.75
  11   2  -6    0.27    1.21
  11   2  -6    0.72    2.55
 -11  -2   6    0.04    1.14
 -11   2  -6    0.20    2.03
 -11   2  -6    0.03    1.13
  11   1  -6    9.61    4.19
  11   1  -6    7.20    2.24
 -11   1  -6    7.56    3.82
 -11  -1   6    9.46    2.37
 -11   1  -6   13.71    3.24
  11   0  -6   -1.65    1.78
  11   0  -6   -0.39    1.00
 -11   0  -6   -0.28    0.96
 -11   0  -6    0.53    2.20
 -11   0   6    0.55    1.11
  11  -1  -6    6.41    2.11
  11  -1  -6    8.59    3.94
 -11   1   6    8.44    2.27
 -11  -1  -6    9.92    2.62
  11  -2  -6    0.93    1.34
  11  -2  -6   -1.73    2.04
 -11  -2  -6   -0.88    0.97
 -11   2   6   -0.19    1.08
  11  -3  -6    0.23    2.22
  11  -3  -6    1.60    1.42
 -11  -3  -6    4.32    1.80
 -11   3   6    1.35    1.34
  11  -4  -6    2.98    1.91
  11  -4  -6    2.11    2.98
 -11   4   6    2.93    1.60
 -11  -4  -6    1.87    1.48
  11  -5  -6    1.76    3.10
 -11  -5  -6    5.15    2.22
 -11   5   6    2.18    1.62
 -12  -4   6    2.13    1.64
  12   3  -6   10.73    2.87
 -12  -3   6   18.98    3.38
  12   2  -6    3.76    1.87
  12   2  -6    2.53    3.40
 -12  -2   6    4.23    1.89
 -12   2  -6    1.63    1.62
  12   1  -6    3.05    3.21
  12   1  -6    1.50    1.57
 -12   1  -6    2.45    1.83
 -12   1  -6    2.91    3.39
 -12  -1   6    0.51    1.22
 -12   0  -6   11.01    4.90
 -12   0  -6   19.06    3.78
  12  -1  -6    2.12    1.77
  12  -1  -6    0.02    2.55
 -12  -1  -6    3.37    1.80
 -12   1   6    2.03    1.58
  12  -2  -6    1.71    1.82
  12  -2  -6    4.38    3.70
 -12   2   6    3.76    1.85
 -12  -2  -6    0.97    1.28
  12  -3  -6   15.47    5.87
  12  -3  -6   12.61    3.17
 -12   3   6   19.59    3.59
  12  -4  -6    2.48    2.98
 -12   4   6    1.18    1.72
 -13  -2   6    0.11    1.48
 -13  -1   6    1.21    1.57
  13   0  -6    2.41    3.41
 -13   0   6    0.86    1.52
  13  -1  -6    2.65    3.40
 -13   1   6    0.69    1.45
  13  -2  -6    2.17    3.73
 -13   2   6    0.08    1.42
   0   9  -7    2.49    2.23
   0   8  -7   -0.92    1.16
   0  -8   7    0.08    0.62
   0  -7   7   -0.14    0.54
   0   7  -7   -0.18    1.07
   0  -7   7   -0.52    0.65
   0  -7   7    0.47    1.27
   0   7  -7    0.25    1.25
   0  -6   7   24.93    2.25
   0   6  -7   28.24    3.97
   0   6  -7   27.35    3.80
   0  -6   7   23.09    3.65
   0  -6   7   30.44    2.83
   0  -5   7   10.00    2.46
   0  -5   7    9.69    1.24
   0   5  -7    9.19    2.46
   0  -5   7    8.92    1.64
   0   5  -7   10.93    2.75
   0  -5   7    9.03    1.73
   0  -4   7   -0.06    0.71
   0   4  -7   -0.05    0.71
   0  -4   7    0.11    0.47
   0   4  -7    0.98    0.98
   0  -4   7   -0.46    0.38
   0  -4   7    0.12    0.34
   0  -3   7   14.08    2.03
   0  -3   7   13.23    1.43
   0  -3   7   13.71    1.52
   0   3  -7   13.90    2.17
   0  -3   7   12.56    1.11
   0  -3   7   12.69    1.15
   0   3  -7   14.17    1.52
   0   3  -7   12.50    2.07
   0  -2   7   19.49    1.62
   0   2  -7   19.23    1.63
   0  -2   7   16.82    1.47
   0  -2   7   19.48    1.26
   0  -2   7   17.43    2.00
   0   2  -7   19.79    2.33
   0  -2   7   18.27    1.52
   0   2  -7   19.40    2.26
   0   2  -7   17.90    1.70
   0  -1   7   44.62    2.63
   0   1  -7   41.13    3.40
   0   1  -7   44.10    2.97
   0  -1   7   45.33    2.60
   0   1  -7   43.89    2.59
   0   1  -7   46.51    3.58
   0  -1   7   45.83    2.47
   0   0  -7    0.40    0.43
   0   0   7    0.45    0.28
   0   0  -7    0.54    0.36
   0   0  -7    0.34    0.27
   0   0  -7    0.29    0.30
   0   0  -7    0.33    0.41
   0  -1  -7   46.85    2.60
   0  -1  -7   45.88    3.04
   0  -1  -7   46.62    3.23
   0   1   7   48.23    2.36
   0  -3  -7   14.36    1.47
   0  -3  -7   13.46    1.12
   0  -3  -7   13.68    1.16
   0  -4  -7    0.12    0.37
   0   4   7   -0.03    0.22
   0   4   7    0.04    0.23
   0  -5  -7   10.12    1.57
   0   5   7   10.67    1.23
   0   5   7   10.28    1.20
   0  -6  -7   25.48    2.96
   0   6   7   28.88    2.44
   0  -7  -7    0.02    0.81
   0   7   7    0.41    0.54
   0   8   7    0.57    0.74
   0  -8  -7   -0.20    1.06
   0   9   7    1.44    1.00
   0  -9  -7    2.25    1.83
   1   9  -7    2.04    1.40
   1   9  -7    5.38    2.76
  -1   9  -7    8.72    3.42
   1   8  -7    6.42    2.01
   1   8  -7    5.97    2.69
  -1  -8   7    5.64    1.34
  -1  -8   7    5.81    1.91
   1   7  -7    0.26    1.30
   1  -7   7    0.20    0.57
   1   7  -7    0.55    0.88
   1   7  -7    1.19    1.36
  -1   7  -7   -0.42    1.02
  -1  -7   7    2.12    1.69
  -1  -7   7    0.87    0.95
  -1   7  -7    0.79    1.46
  -1  -7   7    2.44    0.94
   1   6  -7   32.39    4.24
   1   6  -7   33.42    4.28
   1  -3   7    1.71    0.47
   1  -3   7    2.29    0.73
   1  -3   7    1.92    0.53
   1  -3   7    2.02    1.08
   1   3  -7   -0.20    0.73
   1  -3   7    2.07    0.67
  -1   3  -7    2.34    1.06
  -1  -3   7    0.17    0.62
  -1  -3   7    0.56    0.47
  -1   3  -7    1.89    1.11
   1  -2   7   10.21    1.59
   1  -2   7   10.97    0.87
   1  -2   7    9.93    1.09
   1  -2   7    9.53    1.09
   1  -2   7   10.51    1.14
   1  -2   7    9.96    1.06
  -1   2  -7    9.18    1.89
  -1   2  -7   10.02    1.26
  -1   2  -7    9.47    1.77
   1   1  -7   13.29    1.84
   1   0  -7    0.07    0.30
   1   0  -7    0.07    0.26
   1   0   7    0.08    0.17
   1   0  -7    0.14    0.35
   1   0  -7   -0.04    0.48
   1   0   7   -0.01    0.10
   1   0  -7    0.01    0.26
   1   0   7   -0.06    0.10
  -1   0  -7   -0.11    0.21
  -1   0   7   -0.07    0.13
  -1   0  -7    0.14    0.35
  -1   0  -7   -0.05    0.42
  -1   0  -7   -0.09    0.28
  -1   0   7   -0.13    0.25
  -1   0   7   -0.04    0.10
  -1   0  -7   -0.30    0.20
   1  -2  -7   20.97    1.35
   1  -2  -7   19.72    1.74
   1  -2  -7   22.70    1.67
   1  -2  -7   20.32    1.72
   1  -3  -7    0.12    0.32
   1  -3  -7    0.17    0.42
   1  -3  -7    0.40    0.41
   1  -3  -7    0.00    0.25
  -1  -3  -7    1.68    0.59
  -1  -3  -7    2.08    0.62
   1   7   7    0.51    0.55
   1  -7  -7    0.94    1.17
  -1  -7  -7    0.09    0.88
  -1   7   7    1.05    0.71
   1  -8  -7    3.84    2.04
  -1   8   7    5.12    1.44
   1   9   7    6.49    1.67
   1  -9  -7    4.39    2.42
  -1   9   7    3.53    1.38
  -1  -9  -7    6.46    2.50
   2   9  -7   16.69    3.31
   2   9  -7   15.34    4.32
  -2  -9   7   16.15    1.90
  -2  -9   7   15.62    3.24
  -2   9  -7    6.93    3.55
   2   8  -7   13.22    3.74
   2   8  -7    9.98    2.51
  -2  -8   7    9.98    1.71
  -2  -8   7   11.15    2.52
   2   7  -7    2.46    1.27
   2   7  -7    3.35    2.03
   2   7  -7    2.14    1.75
  -2   7  -7   10.20    3.18
  -2  -7   7    2.89    0.97
  -2  -7   7    2.79    1.73
  -2  -7   7    2.63    1.31
   2   6  -7   13.59    2.42
   2   6  -7   14.91    3.39
   2   6  -7   12.25    3.17
  -2  -6   7   14.26    1.62
  -2  -6   7   12.92    3.05
  -2  -6   7   14.80    2.41
   2  -4   7    1.30    0.54
   2   4  -7   -0.21    0.49
   2  -4   7    0.97    0.60
   2   4  -7    0.48    0.98
   2   4  -7    0.19    0.28
   2  -4   7    0.52    1.00
   2  -4   7    1.16    0.67
   2   4  -7   -0.19    0.64
  -2  -4   7    0.38    0.39
  -2  -4   7    0.05    0.53
  -2   4  -7    0.69    1.01
  -2   4  -7    0.75    0.93
  -2  -4   7    0.17    0.56
  -2  -4   7    0.04    0.66
   2  -3   7   28.12    3.16
   2   3  -7   20.85    2.12
   2  -3   7   26.39    1.80
   2  -3   7   31.01    2.27
   2   3  -7   20.49    2.98
   2  -3   7   29.57    1.76
   2  -3   7   31.05    2.13
   2   3  -7   21.01    1.43
  -2   3  -7   29.46    2.98
  -2   3  -7   30.21    3.34
  -2  -3   7   19.12    1.94
  -2  -3   7   22.28    2.54
  -2  -3   7   21.31    2.21
   2   0  -7    0.15    0.38
   2   0  -7   -0.16    0.24
   2   0  -7   -0.34    0.53
   2   0   7   -0.01    0.09
   2   0   7   -0.09    0.15
   2   0   7   -0.04    0.17
   2   0  -7   -0.30    0.28
  -2   0   7   -0.15    0.14
  -2   0  -7   -0.22    0.26
  -2   0  -7    0.08    0.56
  -2   0  -7   -0.18    0.16
  -2   0   7   -0.25    0.29
  -2   0   7   -0.11    0.12
  -2   0  -7    0.04    0.30
  -2   0  -7    0.02    0.49
   2  -3  -7   19.86    2.28
   2  -3  -7   20.85    2.04
   2  -3  -7   24.18    1.99
  -2  -3  -7   28.78    1.80
  -2   3   7   21.20    1.64
  -2   3   7   21.83    1.50
  -2  -3  -7   28.28    2.40
  -2  -3  -7   30.47    2.21
   2   4   7    1.04    0.49
   2  -4  -7    0.39    0.66
   2   4   7    1.22    0.40
  -2   4   7   -0.01    0.30
  -2   4   7    0.01    0.25
  -2  -4  -7    1.26    0.56
   2  -6  -7   14.10    2.95
   2   7   7    9.51    1.66
  -2  -7  -7   11.06    2.39
   2  -8  -7    8.72    2.91
  -2   8   7   13.65    2.07
   2  -9  -7   14.91    4.07
  -2   9   7   16.81    2.57
  -2   9   7   17.30    2.59
  -3  -9   7   -0.90    0.94
  -3  -9   7    0.29    0.60
   3   8  -7   14.47    3.07
   3   8  -7   14.97    3.99
  -3  -8   7   19.99    3.28
  -3  -8   7   14.84    1.86
   3   7  -7    0.75    1.48
   3   7  -7    0.25    0.94
   3  -7   7    0.05    0.59
   3   7  -7    1.53    1.52
  -3   7  -7   -0.15    1.35
  -3  -7   7    0.87    1.06
  -3   7  -7    0.53    1.30
  -3  -7   7   -0.07    0.52
  -3  -7   7    1.05    1.47
   3   6  -7   54.57    5.72
   3   6  -7   52.75    5.85
   3   6  -7   57.05    4.61
  -3  -6   7   57.48    5.54
  -3  -6   7   55.25    3.63
  -3  -6   7   49.25    4.01
   3  -5   7   16.70    3.65
   3   5  -7   11.13    1.16
   3  -5   7   17.13    1.70
   3   5  -7   12.34    3.17
   3   5  -7    9.95    1.97
  -3   5  -7   14.68    3.35
  -3  -5   7    9.09    1.77
  -3   5  -7   19.21    2.83
  -3  -5   7   12.16    2.65
  -3  -5   7   11.86    1.39
  -3   4  -7   16.45    2.48
  -3   4  -7   17.48    3.45
   3   3  -7   16.65    3.15
  -3  -3   7   14.94    1.69
   3  -2   7    0.11    0.26
   3   2  -7    0.86    0.47
   3   2  -7    0.00    0.81
   3  -2   7    0.05    0.31
   3  -2   7   -0.24    0.60
   3  -2   7    0.01    0.28
   3   2  -7    0.55    0.57
  -3  -2   7    0.61    0.36
  -3  -2   7    0.31    0.53
  -3   2  -7    0.21    0.69
  -3  -2   7    0.48    0.50
  -3   2  -7    0.00    0.34
  -3  -2   7    0.83    0.58
  -3   2  -7   -0.31    0.41
   3  -1   7    1.36    0.53
   3  -1   7    2.22    0.55
   3   1  -7    2.61    1.29
   3   1  -7    1.81    0.72
   3   1  -7    2.74    0.68
   3  -1   7    2.03    0.46
  -3   1  -7    2.09    1.14
  -3  -1   7    2.24    0.53
  -3   1  -7    1.81    0.62
  -3  -1   7    1.39    0.60
  -3  -1   7    1.83    0.67
  -3   1  -7    1.45    0.74
  -3  -1   7    2.20    0.71
   3   0  -7    0.10    0.42
   3   0   7   -0.04    0.16
   3   0  -7   -0.35    0.67
   3   0   7   -0.02    0.12
   3   0  -7   -0.21    0.22
   3   0   7   -0.19    0.18
  -3   0  -7    0.16    0.64
  -3   0  -7   -0.08    0.34
  -3   0   7   -0.04    0.14
  -3   0   7    0.02    0.29
  -3   0  -7   -0.14    0.22
  -3   0   7   -0.40    0.31
   3  -1  -7    1.56    0.72
   3   1   7    1.64    0.43
   3  -1  -7    1.84    0.99
   3  -1  -7    1.80    0.53
  -3  -1  -7    1.31    0.96
  -3   1   7    1.46    0.64
  -3  -1  -7    1.62    0.55
  -3  -1  -7    1.41    0.54
  -3   1   7    1.93    0.40
  -3  -1  -7    1.59    0.86
   3  -2  -7    0.61    0.38
   3  -2  -7    0.94    0.64
   3  -2  -7    0.44    0.72
   3   2   7    0.10    0.24
   3   2   7   -0.04    0.16
  -3   2   7    0.01    0.15
  -3  -2  -7    0.44    0.83
  -3  -2  -7   -0.06    0.71
  -3  -2  -7   -0.09    0.27
  -3   2   7    0.79    0.28
  -3  -2  -7    0.05    0.30
   3  -3  -7   16.34    2.37
   3   5   7   18.37    1.57
   3  -5  -7   12.13    2.73
  -3   5   7   10.82    1.61
  -3  -5  -7   17.28    1.92
   3  -7  -7    0.04    1.41
   3   7   7    1.10    0.65
  -3   7   7    0.29    0.69
  -3  -7  -7    1.12    0.98
   3  -8  -7   15.44    4.03
  -3   8   7   15.40    2.37
   3  -9  -7    0.40    1.91
   3   9   7    6.34    1.64
  -3  -9  -7    7.44    2.50
  -4  -9   7    6.39    2.23
   4   8  -7   24.51    3.91
   4   8  -7   22.11    4.81
  -4  -8   7   23.60    2.32
  -4  -8   7   23.48    3.56
   4   7  -7    0.67    1.36
   4   7  -7    1.31    1.24
   4   7  -7   -0.33    1.29
  -4   7  -7    3.63    2.40
  -4   7  -7    3.24    1.74
  -4  -7   7    0.08    0.55
  -4  -7   7    1.45    1.04
   4   5  -7   19.64    4.05
   4   5  -7   17.34    2.21
  -4  -5   7   16.93    1.68
  -4  -5   7   16.72    2.69
  -4  -5   7   18.30    2.21
   4   3  -7   61.33    5.76
   4   3  -7   53.89    3.85
   4   3  -7   56.07    2.90
  -4  -3   7   55.63    4.24
  -4  -3   7   52.25    3.61
  -4  -3   7   55.79    4.47
   4   2  -7   41.64    4.60
   4   2  -7   44.42    2.22
   4   2  -7   44.67    3.01
   4   2  -7   42.52    3.24
  -4  -2   7   46.53    3.50
  -4  -2   7   44.47    3.53
  -4  -2   7   40.15    3.02
   4   1  -7   12.95    1.67
   4   1  -7   14.56    1.35
   4   1  -7   13.04    2.81
  -4  -1   7   14.23    1.33
  -4  -1   7   14.71    1.71
  -4  -1   7   16.05    1.70
  -4  -1   7   13.69    1.60
   4   0   7   -0.16    0.19
   4   0   7    0.20    0.35
   4   0  -7   -0.33    0.32
   4   0   7    0.03    0.21
   4   0  -7    0.02    0.24
   4   0  -7    0.08    0.82
  -4   0   7   -0.19    0.30
  -4   0  -7    0.27    0.41
  -4   0  -7    0.21    0.34
  -4   0  -7   -0.42    0.67
  -4   0   7    0.12    0.21
  -4   0   7    0.29    0.40
  -4   0   7   -0.04    0.40
   4  -1  -7   12.82    1.20
   4  -1  -7   13.79    1.68
   4  -1  -7   13.87    2.67
  -4   1   7   13.09    1.51
  -4   1   7   13.52    1.14
  -4   1   7   13.20    1.55
   4  -2  -7   45.24    3.08
   4  -2  -7   51.66    4.63
   4  -2  -7   43.82    3.39
  -4   2   7   45.46    2.84
  -4  -2  -7   69.83    5.55
  -4   2   7   45.33    3.30
   4  -3  -7   54.72    4.95
   4  -3  -7   50.02    3.78
  -4   3   7   53.41    3.76
  -4   3   7   56.55    3.27
   4  -5  -7   19.19    3.66
  -4   5   7   16.98    2.07
   4   7   7    2.16    0.83
   4  -7  -7    0.91    1.57
  -4   7   7    0.31    0.73
  -4  -7  -7    1.36    1.16
   4  -8  -7   25.10    5.52
   4  -9  -7    4.78    3.00
  -4   9   7    5.95    1.84
  -5  -9   7    1.73    1.66
   5   8  -7    1.30    1.37
   5   8  -7   -0.43    1.60
  -5   8  -7    7.11    3.27
  -5  -8   7    1.35    0.84
  -5  -8   7    0.48    1.21
   5   7  -7    0.50    1.53
   5   7  -7    0.68    1.08
  -5  -7   7   -0.32    0.84
  -5   7  -7    0.02    1.29
  -5  -7   7   -0.09    0.54
  -5   7  -7   -0.02    1.58
   5   6  -7    0.28    0.96
   5   6  -7    1.48    1.81
  -5   6  -7    7.36    2.50
  -5   6  -7    5.48    2.61
  -5  -6   7    2.13    1.20
  -5  -6   7    1.73    1.50
  -5  -6   7    1.77    0.81
   5   5  -7   35.71    4.92
   5   5  -7   28.49    3.13
  -5  -5   7   33.92    2.55
  -5  -5   7   36.08    4.03
  -5  -5   7   34.28    3.14
   5   3  -7    3.45    1.18
   5   3  -7    2.62    1.67
   5   3  -7    3.34    0.66
  -5  -3   7    3.61    1.11
  -5  -3   7    3.55    1.26
  -5  -3   7    4.16    1.39
  -5   3  -7    9.93    2.73
  -5   3  -7    9.88    2.11
   5   2  -7   40.43    3.14
   5  -2   7   31.78    2.57
   5   2  -7   39.65    2.55
   5   2  -7   38.21    1.96
   5   2  -7   35.94    4.50
  -5   2  -7   27.83    3.19
  -5  -2   7   39.01    2.95
  -5   2  -7   27.80    4.01
  -5  -2   7   34.95    3.20
  -5  -2   7   37.65    3.19
  -5   2  -7   27.52    2.52
   5   1  -7   10.38    1.83
   5   1  -7    8.57    2.52
   5   1  -7   10.44    1.10
  -5  -1   7    9.35    1.68
  -5  -1   7    8.45    1.34
  -5  -1   7    9.18    1.72
   5   0   7    0.11    0.29
   5   0  -7   -0.14    0.22
   5   0  -7   -0.28    0.47
   5   0   7   -0.07    0.25
   5   0  -7    0.13    0.88
  -5   0   7   -0.24    0.42
  -5   0  -7    0.10    0.30
  -5   0  -7   -0.17    0.38
  -5   0   7    0.28    0.55
  -5   0  -7   -0.38    0.78
   5  -1  -7    9.47    1.66
   5  -1  -7    9.15    1.00
   5  -1  -7   12.24    2.92
  -5   1   7   10.43    1.70
  -5   1   7    9.39    1.04
  -5   1   7   10.57    1.53
   5  -2  -7   39.69    3.10
   5   2   7   26.61    2.04
   5   2   7   29.13    2.61
  -5   2   7   33.16    2.59
  -5  -2  -7   28.30    2.57
  -5  -2  -7   28.07    2.29
  -5  -2  -7   25.99    3.87
  -5   2   7   37.40    2.85
   5  -3  -7    3.40    1.70
   5  -3  -7    3.12    1.16
  -5   3   7    4.57    1.21
   5  -6  -7    1.80    1.70
   5  -6  -7    0.77    1.52
  -5  -6  -7    6.91    1.74
  -5   6   7    1.93    0.99
   5   7   7   -0.15    0.46
   5  -7  -7    0.41    1.65
   5  -7  -7   -0.03    1.61
  -5   7   7    0.27    0.77
  -5  -7  -7    0.08    0.98
   5  -8  -7    1.65    2.20
   5  -8  -7    1.31    2.20
  -5   8   7    0.64    1.05
   5  -9  -7    0.69    2.39
   5  -9  -7    0.35    2.23
   6   8  -7    0.37    1.35
  -6  -8   7   -0.13    1.12
  -6  -8   7    0.60    0.67
   6   7  -7    2.95    1.68
  -6   7  -7    1.05    1.54
  -6   7  -7    3.83    2.63
  -6  -7   7    3.58    1.58
  -6  -7   7    4.00    1.08
   6   6  -7    2.46    1.35
   6   6  -7    1.59    1.89
  -6  -6   7    2.94    0.93
  -6   6  -7    0.68    1.47
  -6   6  -7    0.62    1.68
  -6  -6   7    2.10    1.35
   6   4  -7    0.63    0.87
   6   4  -7    0.00    1.32
  -6   4  -7    0.68    0.62
  -6  -4   7    0.98    0.87
  -6  -4   7    0.24    0.86
  -6   4  -7    1.49    1.64
  -6   4  -7    0.60    1.06
   6   3  -7    6.28    1.59
   6   3  -7    5.91    0.79
   6   3  -7    6.52    2.63
   6   3  -7    6.34    1.12
  -6  -3   7    6.98    1.80
  -6  -3   7    6.09    1.50
  -6  -3   7    6.82    1.74
   6   2  -7    9.22    1.78
   6   2  -7    9.73    0.91
   6   2  -7   10.28    1.15
   6   2  -7   10.74    3.15
  -6  -2   7   11.54    1.79
  -6  -2   7   11.00    2.08
  -6  -2   7    8.95    1.67
   6   1  -7   61.59    6.35
   6   1  -7   64.44    3.72
   6   1  -7   57.56    4.27
  -6  -1   7   59.37    4.66
  -6  -1   7   66.23    4.30
   6   0  -7    0.09    0.27
   6   0   7   -0.15    0.30
   6   0  -7    0.23    0.59
   6   0  -7   -0.03    0.99
  -6   0  -7   -0.02    0.54
  -6   0  -7    1.05    1.34
  -6   0   7   -0.44    0.42
  -6   0  -7    0.18    0.35
  -6   0   7   -0.15    0.50
   6  -1  -7   54.44    4.28
   6  -1  -7   67.75    3.74
   6  -1  -7   59.92    6.19
  -6   1   7   65.33    4.68
  -6   1   7   63.21    4.22
   6   2   7   35.66    2.55
  -6  -2  -7   41.03    3.34
  -6  -2  -7   36.17    2.68
  -6  -2  -7   36.01    4.90
   6  -3  -7    5.01    2.27
   6  -3  -7    6.10    1.66
  -6   3   7    4.58    1.36
   6   4   7    0.83    0.52
   6  -4  -7    0.74    0.92
   6  -4  -7    0.45    1.29
  -6  -4  -7    1.36    0.86
  -6   4   7    1.98    0.98
  -6  -5  -7   15.94    2.33
   6   6   7    0.47    0.59
   6  -6  -7    1.41    1.76
  -6  -6  -7    1.20    0.97
  -6   6   7    2.69    1.32
   6  -7  -7    2.29    2.41
   6   7   7    0.65    0.68
  -6  -7  -7    0.18    1.00
  -6   7   7    4.74    1.64
   6  -8  -7   -0.41    1.70
   6   8   7    1.01    0.90
  -6  -8  -7    1.83    1.60
  -7  -8   7   -0.19    0.59
  -7  -8   7   -0.26    1.15
   7   7  -7   -0.44    1.13
  -7   7  -7    3.68    2.74
  -7  -7   7   -0.25    1.03
  -7  -7   7   -0.01    0.58
  -7   7  -7    4.12    2.32
   7   6  -7    0.37    1.65
   7   6  -7    0.83    1.22
  -7   6  -7    6.90    3.11
  -7   6  -7    3.17    1.87
  -7  -6   7    0.77    1.07
   7   5  -7   36.61    5.40
   7   5  -7   30.80    3.54
  -7  -5   7   35.05    3.48
  -7  -5   7   37.77    2.79
   7   3  -7   13.49    3.83
   7   3  -7   11.22    2.17
  -7  -3   7   11.97    2.15
  -7   3  -7    1.82    1.94
  -7   2  -7   21.04    4.67
   7  -1   7   34.74    2.76
  -7   1  -7   32.26    4.80
  -7   1  -7   33.90    2.53
  -7   1  -7   35.10    3.56
   7   0   7    0.05    0.38
   7   0  -7    0.51    0.77
   7   0  -7   -0.66    1.15
  -7   0   7   -0.19    0.58
  -7   0  -7    0.58    0.72
  -7   0   7    0.05    0.64
  -7   0  -7    0.16    1.24
  -7   0  -7    0.09    0.32
   7   1   7   36.03    2.67
  -7  -1  -7   36.55    3.40
  -7  -1  -7   31.87    4.79
  -7  -1  -7   32.33    2.48
  -7  -2  -7   19.13    4.35
   7  -3  -7   13.19    2.46
   7  -3  -7   10.13    3.36
  -7   3   7   11.45    2.19
   7  -4  -7   41.56    4.05
   7  -4  -7   34.94    5.38
  -7   4   7   41.11    3.89
   7  -5  -7   34.18    5.30
   7  -6  -7    0.19    1.80
   7   6   7    5.56    1.35
  -7  -6  -7    5.86    1.84
   7   7   7    3.31    1.19
   7  -7  -7   -0.70    1.64
  -7   7   7   -0.10    0.82
  -7  -7  -7    3.39    1.67
   7  -8  -7    1.21    2.48
  -7  -8  -7    7.43    2.56
   8   7  -7   -0.42    1.33
  -8  -7   7   -0.17    1.08
  -8  -7   7   -0.23    0.58
   8   6  -7    0.26    1.23
  -8  -6   7    0.00    1.03
  -8   6  -7    0.08    1.94
  -8  -6   7    1.23    0.73
  -8   6  -7   -0.12    1.12
   8   5  -7   13.25    4.10
   8   5  -7   11.23    2.52
  -8  -5   7    9.49    2.26
  -8  -5   7   11.56    1.71
  -8   5  -7    4.58    2.87
   8   4  -7    0.93    1.84
   8   4  -7   -0.02    0.97
  -8   4  -7    5.07    1.96
  -8   4  -7    5.98    3.04
  -8  -4   7    0.11    0.90
   8   3  -7    7.08    1.93
   8   3  -7    5.61    3.00
  -8  -3   7    4.01    1.47
  -8   3  -7    3.83    1.69
  -8   3  -7    4.63    2.70
   8   2  -7   18.11    2.81
   8   2  -7   16.37    4.23
  -8   2  -7   11.75    2.62
  -8   2  -7   10.51    3.60
  -8  -2   7   17.81    2.76
  -8   1  -7   18.48    4.35
  -8   1  -7   14.97    2.71
  -8  -1   7    3.00    1.30
   8   0  -7    1.20    1.63
   8   0   7   -0.21    0.38
   8   0  -7    0.11    0.75
  -8   0   7   -0.12    0.71
  -8   0  -7    0.02    1.42
  -8   0   7    0.13    0.73
  -8   0  -7   -0.34    0.70
  -8  -1  -7   15.30    4.10
  -8  -1  -7   14.11    2.62
   8  -2  -7   15.00    4.17
   8   2   7   10.61    1.54
   8  -2  -7   15.61    2.68
  -8  -2  -7   11.70    2.31
  -8   2   7   20.87    2.54
  -8   2   7   17.72    2.59
   8  -3  -7    6.58    2.99
   8  -3  -7    8.02    2.12
   8   3   7    4.63    1.12
  -8   3   7    3.97    1.45
  -8   3   7    5.52    1.68
  -8  -3  -7    6.48    1.77
   8  -4  -7    0.27    1.69
   8  -4  -7   -0.18    1.03
  -8   4   7   -0.10    0.81
  -8  -4  -7    4.46    1.50
   8  -5  -7   11.55    4.23
  -8   5   7   15.92    3.01
   8   6   7    0.15    0.62
   8  -6  -7   -0.68    1.62
  -8  -6  -7    0.12    0.96
   8   7   7   -0.05    0.66
   8  -7  -7    1.16    2.23
  -8  -7  -7   -0.71    1.05
  -9  -7   7    0.41    1.31
  -9  -7   7    0.65    0.73
   9   6  -7    3.38    1.82
  -9   6  -7    0.88    1.64
  -9  -6   7    2.13    1.49
  -9  -6   7    3.89    1.09
   9   5  -7    1.89    1.48
   9   5  -7    1.16    1.98
  -9  -5   7    1.22    0.79
  -9  -5   7    0.50    1.14
  -9   5  -7    6.16    3.54
  -9   5  -7    4.69    2.19
   9   4  -7    7.75    3.57
   9   4  -7    4.93    1.85
  -9  -4   7    8.57    2.19
   9   3  -7    3.07    1.47
   9   3  -7    0.02    1.94
  -9   3  -7    1.73    2.17
  -9   3  -7    5.36    2.01
  -9  -3   7    1.91    1.36
   9   2  -7   10.40    3.88
   9   2  -7    9.48    2.26
  -9  -2   7   11.47    2.26
   9   1  -7    6.20    1.93
   9   1  -7    2.72    2.56
  -9  -1   7    3.55    1.39
  -9   1  -7    6.82    2.07
  -9   1  -7    6.91    3.10
   9   0  -7    0.34    0.91
   9   0   7    0.34    0.52
   9   0  -7   -0.71    1.58
  -9   0  -7    0.48    0.93
  -9   0  -7   -1.33    1.17
  -9   0   7   -0.36    0.69
   9  -1  -7    3.62    1.60
   9   1   7    5.19    1.27
   9  -1  -7    3.28    2.43
  -9   1   7    2.98    1.25
  -9  -1  -7    5.40    3.03
  -9  -1  -7    4.25    1.65
   9  -2  -7   10.24    2.45
   9  -2  -7    7.92    3.44
  -9   2   7    7.63    2.12
  -9   2   7    7.09    2.02
   9   3   7    4.31    1.19
   9  -3  -7    1.20    2.17
   9  -3  -7    2.14    1.40
  -9   3   7    2.53    1.41
  -9  -3  -7    4.27    1.57
  -9   3   7    2.74    1.45
   9  -4  -7    4.53    1.91
   9  -4  -7    8.65    3.73
   9  -5  -7    0.68    2.04
   9   5   7    5.89    1.44
  -9  -5  -7    4.88    1.79
   9  -6  -7    3.09    3.03
   9   6   7   -0.06    0.66
  -9  -6  -7    1.22    1.32
   9  -7  -7    1.39    2.96
 -10  -6   7    0.60    0.81
 -10  -6   7    1.61    1.45
  10   5  -7    1.67    1.44
 -10  -5   7    0.48    0.73
 -10  -5   7    0.83    1.36
 -10   5  -7    0.07    1.39
  10   4  -7    8.71    2.34
  10   4  -7    6.32    3.27
 -10  -4   7    5.66    1.97
 -10   4  -7    0.02    2.17
  10   3  -7   -0.42    2.19
  10   3  -7    0.65    1.14
 -10   3  -7    0.60    2.14
 -10  -3   7    0.63    1.26
 -10   3  -7    1.83    1.48
  10   2  -7   25.57    4.01
  10   2  -7   30.21    6.73
 -10  -2   7   30.86    3.46
 -10   1  -7   28.86    6.25
  10   0  -7   -0.65    0.86
  10   0  -7    0.55    1.98
 -10   0  -7   -0.48    0.76
 -10   0   7   -0.60    0.80
 -10   0  -7    0.04    1.68
 -10  -1  -7   30.06    6.51
  10  -2  -7   25.37    3.95
  10  -2  -7   25.98    6.23
 -10   2   7   31.40    3.51
  10  -3  -7    0.36    1.05
  10   3   7    2.21    1.06
  10  -3  -7   -0.92    2.03
 -10  -3  -7    3.06    1.48
 -10   3   7    0.62    1.22
  10  -4  -7    6.73    2.33
  10  -4  -7    9.25    4.41
 -10   4   7    7.95    2.28
  10  -5  -7    0.53    2.30
 -10  -5  -7    0.87    1.14
  10  -6  -7    1.69    3.15
 -11  -5   7   -0.26    0.63
 -11  -5   7   -0.58    1.24
  11   4  -7    1.25    1.48
 -11  -4   7    0.89    1.37
 -11   4  -7    1.60    1.65
  11   3  -7    1.83    1.56
  11   3  -7    0.12    2.54
 -11   3  -7    0.67    1.44
 -11  -3   7    3.31    1.71
 -11   3  -7    0.92    2.36
  11   2  -7   18.32    5.50
  11   2  -7   14.33    3.12
 -11  -2   7   17.15    3.09
 -11   2  -7    7.96    2.64
  11   1  -7    0.87    1.41
  11   1  -7   -0.43    2.05
 -11   1  -7   12.82    4.78
 -11   1  -7   14.37    3.30
  11   0  -7    1.17    1.34
  11   0  -7    2.36    2.55
 -11   0   7   -0.05    1.07
 -11   0  -7   -0.29    2.13
 -11   0  -7   -0.53    1.06
  11  -1  -7    0.04    2.12
  11  -1  -7    0.08    1.22
 -11   1   7    1.92    1.35
  11  -2  -7   18.49    3.63
  11  -2  -7   20.10    5.74
 -11   2   7   19.10    3.32
  11  -3  -7    2.83    3.05
  11  -3  -7    1.32    1.56
 -11  -3  -7    1.01    1.32
 -11   3   7    1.71    1.52
  11  -4  -7    1.05    1.66
  11  -4  -7    1.55    2.75
 -11   4   7    1.50    1.48
 -11  -4  -7    2.11    1.58
  11  -5  -7    1.37    3.12
 -11   5   7   -0.33    1.38
 -12  -4   7    0.53    1.43
  12   3  -7   -1.35    1.27
 -12  -3   7   -0.02    1.29
 -12   3  -7    0.70    1.46
  12   2  -7    0.38    2.67
  12   2  -7    1.14    1.46
 -12   2  -7    9.82    3.02
 -12  -2   7    1.65    1.54
  12   1  -7    5.69    2.25
  12   1  -7   10.17    4.52
 -12  -1   7    7.16    2.26
  12   0  -7    0.36    1.43
  12   0  -7    1.43    2.98
 -12   0   7    0.18    1.15
 -12   0  -7    0.46    1.30
  12  -1  -7    5.66    2.34
  12  -1  -7    1.55    3.19
 -12   1   7    6.51    2.19
 -12  -1  -7    0.62    1.29
  12  -2  -7    1.93    2.98
  12  -2  -7    0.56    1.48
 -12   2   7    1.16    1.45
  12  -3  -7   -0.60    2.89
 -12   3   7   -0.33    1.31
 -12  -3  -7    1.01    1.41
  12  -4  -7    1.95    3.30
 -12   4   7   -0.37    1.37
 -13  -2   7    3.00    2.02
  13   1  -7    6.85    4.39
 -13  -1   7    8.67    2.64
  13   0  -7   -0.42    2.85
 -13   0   7    0.82    1.58
  13  -1  -7    8.13    4.50
 -13   1   7    8.09    2.47
  13  -2  -7    3.90    4.20
 -13   2   7    1.74    1.77
   0   8  -8    0.51    1.64
   0   8  -8    0.13    0.93
   0  -8   8    0.34    0.66
   0   8  -8   -0.52    1.27
   0   7  -8   30.78    4.43
   0   7  -8   28.28    4.44
   0  -7   8   28.55    2.65
   0  -7   8   34.08    3.34
   0  -6   8    0.57    0.58
   0   6  -8    0.28    1.14
   0   6  -8    0.60    1.16
   0  -6   8    0.10    0.70
   0  -5   8   10.02    2.01
   0   5  -8   10.19    2.61
   0  -5   8    9.29    1.43
   0   5  -8   10.87    2.96
   0  -5   8    9.60    1.74
   0  -4   8   11.95    1.66
   0   4  -8    8.59    2.23
   0  -4   8   11.11    2.43
   0  -4   8   12.90    1.32
   0   4  -8   12.37    1.94
   0  -4   8    9.89    1.63
   0   4  -8   10.24    2.52
   0  -3   8   44.76    3.21
   0   3  -8   42.99    3.01
   0   3  -8   41.09    4.05
   0  -3   8   42.25    2.82
   0  -3   8   41.49    3.83
   0  -3   8   43.77    2.59
   0   3  -8   46.68    4.27
   0  -2   8   10.49    1.19
   0   2  -8   10.74    2.06
   0  -2   8   11.72    1.05
   0  -2   8   10.94    1.25
   0   2  -8   11.72    2.21
   0   2  -8   11.29    1.39
   0  -2   8   12.10    1.68
   0   2  -8   12.52    1.37
   0  -2   8   11.11    1.17
   0  -1   8   38.29    2.38
   0  -1   8   38.93    2.34
   0   1  -8   38.09    3.22
   0   1  -8   37.90    2.43
   0   1  -8   36.63    3.26
   0   1  -8   38.96    2.78
   0  -1   8   36.34    2.24
   0   0  -8   34.95    2.74
   0   0   8   37.70    1.93
   0   0  -8   37.09    2.24
   0   0   8   36.50    1.92
   0   0   8   35.49    2.00
   0   0  -8   34.57    2.91
   0   0  -8   35.84    2.48
   0   0  -8   32.81    2.55
   0  -1  -8   37.06    2.22
   0  -1  -8   35.25    2.62
   0   1   8   36.48    2.00
   0  -1  -8   38.56    2.84
   0  -1  -8   37.31    2.42
   0  -2  -8   10.37    1.25
   0   2   8   11.15    0.99
   0  -3  -8   46.67    2.72
   0  -3  -8   44.85    2.72
   0  -3  -8   46.74    3.32
   0  -4  -8   12.17    1.33
   0   4   8   11.01    0.91
   0   4   8   11.49    0.93
   0   5   8    8.24    1.07
   0   5   8    8.81    1.08
   0  -5  -8    9.36    1.49
   0  -6  -8    0.82    0.88
   0   6   8    0.61    0.52
   0  -7  -8   33.12    3.71
   0   7   8   28.93    2.72
   0   8   8    0.24    0.66
   0  -8  -8   -0.47    0.94
   0   9   8    1.01    0.88
   0  -9  -8    2.04    1.72
  -1  -9   8    2.25    1.05
   1   8  -8    0.02    1.39
   1   8  -8    0.38    0.99
   1   8  -8    0.45    1.50
  -1  -8   8    0.49    0.75
  -1   8  -8    6.61    2.96
  -1  -8   8    1.14    1.13
  -1   8  -8    5.48    2.44
   1   7  -8   27.22    4.45
   1   7  -8   27.83    3.23
   1   7  -8   32.21    4.48
   1  -7   8   27.82    2.59
  -1  -7   8   29.10    2.59
  -1  -7   8   29.02    3.12
  -1   7  -8   23.59    4.94
  -1   7  -8   25.44    3.98
   1   6  -8    9.37    2.72
   1   6  -8   12.43    2.33
   1   6  -8   16.89    3.78
  -1  -6   8   13.51    1.62
  -1  -6   8   13.50    2.25
   1  -5   8   14.69    1.63
   1   5  -8   16.29    2.14
   1   5  -8   17.81    3.00
   1   5  -8   14.99    3.27
   1  -5   8   16.33    2.04
   1  -5   8   16.67    2.30
  -1  -5   8   19.36    1.80
  -1   5  -8   17.50    3.72
  -1  -5   8   18.83    2.15
  -1   5  -8   14.16    3.03
   1  -4   8    5.98    1.09
   1   4  -8   10.66    2.38
   1   4  -8    9.27    2.40
   1  -4   8    6.90    1.38
   1   4  -8   10.35    1.82
   1  -4   8    7.31    1.40
  -1   4  -8    8.12    2.05
  -1   4  -8    7.78    2.20
  -1  -4   8    9.50    2.20
  -1  -4   8   10.54    1.58
  -1  -4   8    9.49    1.60
  -1  -4   8    7.99    1.07
   1   3  -8   17.25    2.43
   1  -3   8   14.18    1.32
   1  -3   8   15.83    1.70
   1   3  -8   20.84    1.99
   1  -3   8   14.57    1.54
   1   3  -8   17.42    2.66
  -1  -3   8   20.28    1.82
  -1   3  -8   13.81    2.59
  -1   3  -8   13.73    2.37
  -1  -3   8   18.52    2.31
  -1  -3   8   20.30    1.96
   1  -2   8    7.24    0.99
   1  -2   8    8.50    1.06
   1  -2   8    7.33    1.00
   1  -2   8    7.24    1.09
  -1   2  -8    8.62    1.21
  -1   2  -8    7.62    1.70
  -1   2  -8    7.87    1.85
  -1   2  -8    7.53    1.17
   1  -2  -8   21.57    1.69
   1  -2  -8   20.83    1.36
   1  -2  -8   22.09    1.88
   1  -2  -8   23.60    1.86
  -1   2   8   20.21    1.58
   1  -3  -8   18.07    1.73
   1  -3  -8   17.88    1.31
   1  -3  -8   17.20    1.59
   1  -3  -8   18.64    1.73
  -1  -3  -8   15.31    1.69
  -1  -3  -8   14.45    1.16
  -1  -3  -8   13.58    1.38
   1   4   8    8.51    0.85
   1   4   8    7.98    0.79
   1  -4  -8   11.08    1.46
  -1  -4  -8    7.84    1.07
  -1   4   8   11.99    0.94
  -1   4   8   10.28    0.99
   1   5   8   15.95    1.48
   1   5   8   14.14    1.49
   1  -5  -8   17.09    2.18
  -1   5   8   19.27    1.69
  -1  -5  -8   14.42    1.77
  -1   5   8   19.20    1.56
   1  -6  -8   12.98    2.52
   1   7   8   25.77    2.55
   1  -7  -8   30.04    3.77
  -1  -7  -8   26.26    3.23
  -1   7   8   32.54    2.85
   1  -8  -8    0.92    1.37
   1   8   8    4.20    1.21
  -1  -8  -8    4.13    1.79
   1   9   8    0.38    0.78
   1  -9  -8    1.35    1.90
  -1   9   8    1.66    1.07
  -1  -9  -8    0.02    1.22
  -2  -9   8    3.01    1.08
  -2  -9   8    0.50    1.37
   2   8  -8    3.89    2.45
   2   8  -8    2.59    1.43
   2  -8   8    1.01    0.85
  -2   8  -8   -0.23    1.53
  -2   8  -8   -0.02    1.38
  -2  -8   8    5.57    1.37
  -2  -8   8    6.31    1.96
   2  -7   8    7.86    1.56
   2   7  -8    3.40    1.98
   2   7  -8    1.07    1.07
   2   7  -8    3.43    2.03
  -2   7  -8    7.04    2.47
  -2  -7   8    3.42    1.40
  -2  -7   8    2.65    0.99
  -2   7  -8    7.11    2.74
   2   6  -8   12.51    3.12
   2   6  -8   13.74    3.39
   2   6  -8   11.14    2.23
  -2  -6   8   12.40    2.26
  -2  -6   8   11.73    1.55
   2   5  -8    2.06    1.36
   2   5  -8    2.36    1.10
   2   5  -8    1.43    1.40
   2  -5   8    3.12    0.88
   2   5  -8    1.83    0.53
  -2   5  -8    1.97    1.49
  -2  -5   8    1.06    0.83
  -2   5  -8    0.98    1.09
  -2  -5   8    1.27    0.62
   2   4  -8   69.26    3.44
   2   4  -8   69.35    6.23
   2   4  -8   68.30    5.93
   2   4  -8   74.63    4.77
  -2  -4   8   70.62    5.01
  -2  -4   8   61.38    4.19
  -2  -4   8   78.15    5.80
  -2  -4   8   67.39    3.93
   2   3  -8   22.88    2.89
   2   3  -8   23.13    3.27
   2   3  -8   27.90    2.38
  -2  -3   8   26.32    2.47
  -2  -3   8   27.69    2.86
  -2  -3   8   28.93    2.36
   2   2  -8    1.20    0.55
   2   2  -8    1.34    0.97
   2  -2   8    0.32    0.37
   2  -2   8    0.34    0.39
   2  -2   8    0.42    0.41
   2   2  -8    1.49    0.71
   2  -2   8    0.71    0.34
   2   2  -8    1.13    0.80
  -2  -2   8    1.50    0.63
  -2  -2   8    1.72    0.82
  -2   2  -8    0.84    0.51
  -2   2  -8    0.19    0.59
  -2  -2   8    0.76    0.39
  -2  -2   8    0.63    0.53
  -2   2  -8   -0.04    0.71
   2   0  -8   32.03    2.52
   2   0  -8   31.30    3.01
   2   0  -8   32.12    2.36
   2   0  -8   31.77    2.35
  -2   0   8   30.58    2.18
  -2   0   8   31.48    1.87
   2  -2  -8    1.56    0.80
   2  -2  -8    1.65    0.69
   2  -2  -8    1.73    0.47
   2  -2  -8    0.82    0.46
  -2  -2  -8    0.19    0.51
  -2  -2  -8    0.16    0.25
  -2  -2  -8    0.29    0.40
  -2   2   8    0.75    0.51
  -2  -2  -8   -0.06    0.62
   2  -3  -8   26.48    2.57
   2  -3  -8   26.76    2.33
   2  -3  -8   27.31    2.22
  -2   3   8   25.93    1.74
  -2   3   8   26.94    1.61
   2   5   8    3.29    0.75
   2   5   8    2.68    0.80
   2  -5  -8    1.61    1.09
  -2   5   8    2.52    0.79
  -2  -5  -8    2.85    0.93
  -2   5   8    1.76    0.62
   2  -6  -8   15.01    2.94
  -2   6   8   10.71    1.60
   2  -7  -8    2.24    1.58
   2   7   8    6.11    1.28
  -2  -7  -8    5.98    1.75
  -2   7   8    4.48    1.34
   2  -8  -8    5.93    2.52
  -2   8   8    6.53    1.63
   2  -9  -8    1.71    2.01
  -2   9   8    1.32    0.94
  -2   9   8    1.06    0.94
  -2  -9  -8   -0.69    1.01
  -3  -9   8    0.91    0.84
  -3  -9   8    2.19    1.63
   3   8  -8    1.47    1.78
   3   8  -8    1.42    1.42
  -3  -8   8    1.24    0.83
  -3   8  -8    6.55    3.12
  -3  -8   8    1.84    1.42
  -3   8  -8    7.73    2.82
   3   7  -8    0.34    1.22
   3   7  -8    1.16    1.62
   3  -7   8    2.81    1.04
   3   7  -8    0.03    1.06
  -3  -7   8    0.68    1.09
  -3   7  -8    3.98    2.38
  -3  -7   8    0.52    0.66
  -3   7  -8    3.72    2.04
   3   5  -8   11.88    1.14
   3   5  -8   11.24    3.03
   3   5  -8   11.39    2.14
   3   5  -8   14.39    3.15
  -3  -5   8   11.76    2.08
  -3  -5   8   11.44    1.41
   3   4  -8   16.79    2.10
   3   4  -8   18.86    3.65
   3   4  -8   19.50    1.37
   3  -4   8   18.92    2.10
   3  -4   8   20.40    1.85
  -3  -4   8   18.19    2.77
  -3  -4   8   20.75    2.46
  -3  -4   8   20.01    2.15
  -3   4  -8   18.62    3.16
  -3   4  -8   22.05    2.89
   3  -1   8    7.72    0.90
   3  -1   8    7.11    1.02
   3  -1   8    7.62    0.78
   3   1  -8    7.56    1.04
   3   1  -8    9.91    1.61
   3   1  -8    7.92    2.00
  -3  -1   8    7.93    0.89
  -3   1  -8    6.84    1.43
  -3   1  -8    7.46    1.98
  -3  -1   8    7.54    1.30
  -3   1  -8    6.75    1.07
  -3   1  -8    6.95    0.78
  -3  -1   8    7.44    1.27
   3   0  -8   57.54    3.68
   3   0  -8   56.11    3.66
   3   0   8   61.06    3.53
   3   0   8   62.14    3.35
   3   0  -8   58.88    4.93
  -3   0   8   62.47    3.59
  -3   0  -8   55.53    4.98
  -3   0  -8   55.11    3.92
  -3   0  -8   58.12    3.81
  -3   0   8   58.41    3.67
  -3   0   8   58.50    3.30
   3  -1  -8    8.52    1.48
   3  -1  -8    7.70    0.99
   3  -1  -8    8.92    1.98
   3  -1  -8    7.39    0.83
   3   1   8    7.48    0.80
   3   1   8    7.18    0.66
  -3   1   8    9.73    1.48
  -3  -1  -8    6.24    1.72
  -3   1   8    8.37    0.74
  -3  -1  -8    6.18    1.14
  -3  -1  -8    6.98    1.01
   3  -2  -8   36.58    3.52
   3  -2  -8   38.88    2.73
   3  -2  -8   37.02    2.91
  -3   2   8   37.62    2.65
  -3   2   8   38.64    2.25
  -3   2   8   39.92    2.57
   3   4   8   22.53    1.92
   3  -4  -8   18.98    2.68
   3   4   8   22.01    1.58
   3  -4  -8   18.41    2.20
  -3   4   8   19.26    1.59
  -3  -4  -8   22.91    1.95
  -3   4   8   19.03    1.90
   3  -5  -8   11.92    2.70
   3  -7  -8   -0.64    1.31
   3   7   8    2.41    0.91
  -3  -7  -8    2.84    1.32
  -3   7   8    0.35    0.72
   3   8   8    8.21    1.66
   3  -8  -8    1.07    1.93
  -3  -8  -8    9.73    2.38
   3  -9  -8    0.62    2.04
  -3   9   8    0.85    1.04
  -3  -9  -8    1.83    1.49
  -4  -9   8    4.04    1.81
  -4  -9   8    1.79    0.90
   4   8  -8   -0.19    1.55
   4   8  -8    0.44    1.33
  -4   8  -8    8.49    3.64
  -4  -8   8   -0.65    0.51
  -4  -8   8   -0.78    0.80
   4   7  -8    0.81    1.18
   4   7  -8    0.75    1.47
   4   7  -8    0.51    1.52
  -4   7  -8    1.23    1.40
  -4   7  -8    0.03    1.68
  -4  -7   8    0.37    0.92
  -4  -7   8    1.19    0.79
   4   6  -8    1.52    1.55
   4   6  -8    2.20    1.74
   4   6  -8    1.22    1.16
   4  -6   8    2.15    0.94
  -4   6  -8    0.56    1.55
  -4  -6   8    1.62    0.78
  -4   6  -8    0.46    1.27
  -4  -6   8    0.00    0.76
   4  -5   8    0.40    0.54
   4   5  -8    1.62    0.52
   4   5  -8    1.46    0.98
   4   5  -8    0.84    1.44
  -4   5  -8    0.22    0.93
  -4  -5   8    0.70    0.92
  -4  -5   8    1.27    0.64
  -4   5  -8    0.69    1.39
   4   4  -8   17.73    2.21
   4   4  -8   16.05    1.25
   4   4  -8   15.02    3.40
  -4  -4   8   15.55    2.26
  -4  -4   8   17.18    2.11
   4   3  -8   23.42    3.55
  -4  -3   8   23.06    2.29
   4   1  -8    0.07    0.33
   4   1  -8    0.18    0.89
   4  -1   8    0.43    0.34
   4  -1   8   -0.02    0.28
   4   1  -8   -0.31    0.48
  -4   1  -8    0.61    0.61
  -4  -1   8    0.01    0.42
  -4   1  -8   -0.22    0.76
  -4   1  -8    0.42    0.43
  -4  -1   8    0.08    0.52
   4   0  -8   37.68    2.88
   4   0  -8   34.06    3.93
   4   0  -8   35.96    2.52
  -4   0   8   35.83    2.35
  -4   0   8   34.67    2.79
  -4   0   8   37.20    2.72
   4  -1  -8   -0.02    0.28
   4  -1  -8   -0.09    0.50
   4   1   8    0.20    0.25
   4  -1  -8   -0.34    0.75
   4   1   8    0.45    0.41
  -4   1   8   -0.12    0.16
  -4  -1  -8    0.73    0.95
  -4   1   8    0.07    0.49
  -4   1   8   -0.02    0.34
  -4  -1  -8    0.28    0.36
  -4  -1  -8    0.37    0.45
   4   4   8   41.46    2.72
   4   4   8   43.18    3.30
  -4  -4  -8   40.69    3.16
   4  -5  -8    1.68    1.53
   4   5   8    0.69    0.44
   4  -5  -8    0.31    1.16
  -4  -5  -8    0.39    0.64
  -4   5   8    1.25    0.83
   4   6   8    2.47    0.78
   4  -6  -8    2.12    1.64
  -4   6   8    1.86    0.98
  -4  -6  -8    1.78    1.04
   4   7   8   -0.01    0.50
   4  -7  -8    0.57    1.53
  -4  -7  -8    0.24    0.89
  -4   7   8    0.93    0.89
   4  -8  -8    0.36    1.87
   4   8   8    6.26    1.47
  -4  -8  -8    5.73    2.01
   4  -9  -8    3.37    2.58
  -4  -9  -8    0.77    1.41
   5   8  -8    1.66    1.83
   5   8  -8    0.60    1.37
  -5  -8   8    2.77    1.07
  -5  -8   8    1.44    1.36
   5   7  -8    0.07    1.60
   5   7  -8   -0.36    1.29
  -5   7  -8   12.19    3.82
  -5  -7   8    1.16    0.98
  -5   7  -8   12.70    3.24
   5   6  -8    0.81    1.05
   5   6  -8    1.38    1.83
  -5  -6   8    2.90    0.96
  -5   6  -8    2.98    1.64
  -5   6  -8    1.48    1.93
  -5  -6   8    2.26    1.26
   5  -5   8    2.16    0.93
   5   5  -8    4.47    2.29
   5   5  -8    5.24    1.63
  -5   5  -8    3.78    2.09
  -5  -5   8    1.88    1.04
  -5  -5   8    3.09    0.89
  -5   5  -8    1.86    1.37
   5   3  -8   37.34    4.87
   5   2  -8   19.77    3.94
   5   1  -8    4.73    0.91
   5  -1   8    5.08    0.93
   5   1  -8    3.30    1.15
   5   1  -8    4.30    1.96
   5  -1   8    5.66    1.02
  -5   1  -8    4.70    1.05
  -5  -1   8    3.18    1.02
  -5  -1   8    4.79    1.28
  -5   1  -8    5.06    2.12
  -5   1  -8    4.38    1.31
   5   0  -8    2.87    0.68
   5   0  -8    3.31    1.09
   5   0  -8    1.88    1.53
  -5   0   8    3.24    1.04
  -5   0  -8    6.14    1.10
  -5   0  -8    4.99    1.99
  -5   0   8    1.82    0.84
  -5   0  -8    6.77    1.44
   5  -1  -8    5.14    1.98
   5  -1  -8    4.57    1.32
   5   1   8    5.44    0.80
   5  -1  -8    4.38    0.83
  -5  -1  -8    4.82    0.98
  -5  -1  -8    4.00    1.10
  -5   1   8    4.20    1.13
  -5   1   8    3.22    1.04
  -5  -1  -8    5.25    2.10
   5  -2  -8   16.37    2.10
   5   5   8    2.67    0.81
   5  -5  -8    2.07    1.77
  -5   5   8    3.79    1.30
  -5  -5  -8    2.51    1.11
   5   6   8    2.77    0.87
   5  -6  -8    3.13    1.85
   5  -6  -8    2.25    1.83
  -5   6   8    1.63    1.01
  -5  -6  -8    1.44    1.00
   5  -7  -8    1.31    1.79
  -5  -7  -8   13.85    2.71
   5  -8  -8    2.58    2.50
   5  -8  -8    0.32    1.95
   5   8   8    5.56    1.42
  -5   8   8    0.22    0.94
  -5  -8  -8    5.23    1.99
  -6  -8   8    1.87    1.61
  -6  -8   8    1.38    0.86
   6   7  -8    2.89    1.73
  -6   7  -8    7.77    3.49
  -6  -7   8    2.55    1.44
  -6  -7   8    4.01    1.16
  -6   7  -8    6.04    2.48
   6   6  -8    6.55    2.04
   6   6  -8    3.97    2.47
  -6   6  -8    4.77    2.19
  -6   6  -8    7.17    3.21
  -6  -6   8    6.18    1.32
  -6  -6   8    8.81    2.10
   6   5  -8    1.72    1.16
   6   5  -8    1.93    1.86
  -6   5  -8    4.18    1.30
  -6  -5   8    3.16    0.91
  -6   5  -8    3.50    2.23
  -6  -5   8    3.79    1.41
  -6   5  -8    6.79    2.38
   6   4  -8    4.32    0.78
   6   4  -8    6.59    2.66
   6   4  -8    3.84    1.41
  -6  -4   8    5.50    1.60
   6   3  -8   32.83    4.81
   6   3  -8   32.09    2.52
   6   3  -8   27.66    1.84
   6   3  -8   30.84    3.13
  -6  -3   8   35.07    3.07
  -6  -3   8   36.58    3.62
   6   2  -8    0.55    0.46
   6   2  -8    0.63    1.43
   6  -2   8    0.22    0.51
   6  -2   8    0.03    0.46
   6   2  -8    1.11    0.85
  -6   2  -8    0.65    0.86
  -6   2  -8    0.43    1.15
  -6   2  -8   -0.01    0.40
  -6  -2   8    0.40    0.70
  -6  -2   8    0.74    0.87
   6   0  -8   27.49    2.00
   6   0  -8   26.61    4.14
   6   0  -8   28.37    2.85
  -6   0   8   27.05    2.61
  -6   0   8   29.28    2.92
   6  -2  -8    0.48    0.74
   6  -2  -8    0.55    1.30
   6   2   8    0.61    0.43
  -6  -2  -8    0.66    0.52
  -6  -2  -8    1.13    1.58
  -6   2   8    0.23    0.60
  -6   2   8    0.21    0.69
  -6  -2  -8    0.60    0.64
   6   3   8   14.62    1.49
  -6  -3  -8   14.55    1.94
   6  -4  -8    5.60    2.44
   6   5   8    5.03    1.14
   6  -5  -8    5.25    2.45
  -6   5   8    3.13    1.33
  -6  -5  -8    5.29    1.54
   6   6   8    4.52    1.15
   6  -6  -8    4.06    2.39
  -6  -6  -8    3.83    1.40
  -6   6   8    8.47    2.04
   6   7   8    5.74    1.38
   6  -7  -8    3.22    2.46
  -6   7   8    2.05    1.23
  -6  -7  -8    4.66    1.82
   6  -8  -8    2.29    2.53
  -6  -8  -8    1.57    1.42
  -6   8   8    2.06    1.45
  -7  -8   8    1.38    1.40
  -7  -8   8    1.63    0.87
   7   7  -8    2.45    1.74
  -7   7  -8   11.23    3.15
  -7  -7   8    0.80    1.32
  -7  -7   8    0.64    0.77
   7   6  -8    0.44    1.85
   7   6  -8   -0.35    1.07
  -7  -6   8    0.11    0.57
  -7   6  -8    0.48    2.07
  -7   6  -8   -0.51    1.11
  -7  -6   8   -0.12    0.89
   7   5  -8    4.12    1.67
   7   5  -8    4.69    2.59
  -7   5  -8    1.26    1.34
  -7  -5   8    5.97    1.89
  -7   4  -8   10.58    3.69
  -7   4  -8   15.83    1.94
  -7   4  -8   15.22    3.17
   7   3  -8   42.54    3.94
   7   3  -8   41.93    2.49
   7   3  -8   48.01    6.12
  -7  -3   8   44.86    3.77
   7   2  -8    0.42    0.75
   7   2  -8    0.28    1.56
   7   2  -8    0.20    0.26
   7  -2   8    0.85    0.66
  -7  -2   8    0.01    0.78
  -7   2  -8    0.44    0.87
  -7   2  -8    0.79    0.60
  -7   2  -8    1.08    1.60
  -7  -2   8    1.07    0.84
   7   1  -8    0.59    1.50
   7   1  -8    0.20    0.71
   7  -1   8    1.63    0.74
  -7  -1   8    0.46    0.79
  -7   1  -8    1.09    0.61
  -7  -1   8   -0.03    0.69
  -7   1  -8    1.30    1.65
  -7   1  -8    1.01    0.99
   7   0  -8   14.72    2.56
   7   0  -8   13.41    3.70
  -7   0   8   10.46    2.15
  -7   0   8   11.18    2.01
   7  -1  -8   -0.42    1.11
   7  -1  -8    0.36    0.81
   7   1   8    1.63    0.68
  -7  -1  -8    2.53    1.82
  -7  -1  -8    2.66    1.15
  -7   1   8    0.03    0.58
  -7  -1  -8    1.59    0.67
  -7   1   8   -0.43    0.54
   7  -2  -8   -0.46    0.64
   7   2   8    0.50    0.50
   7  -2  -8    0.88    1.50
  -7  -2  -8    0.62    0.70
  -7  -2  -8    0.80    1.58
  -7   2   8   -0.44    0.55
  -7   2   8    0.12    0.79
  -7  -2  -8    0.57    0.45
   7  -3  -8   47.76    6.04
   7  -3  -8   47.85    4.31
  -7   3   8   48.75    4.28
   7  -5  -8    2.67    2.29
  -7   5   8    5.79    1.75
   7  -6  -8    0.66    1.75
   7   6   8   -0.12    0.50
  -7  -6  -8   -0.01    0.86
  -7   6   8   -0.38    0.74
   7  -7  -8    0.72    2.16
   7   7   8   11.23    1.97
  -7  -7  -8   10.63    2.61
   7  -8  -8    2.64    2.79
  -8  -7   8    9.87    2.43
  -8  -7   8    6.51    1.40
   8   6  -8    1.56    2.35
   8   6  -8    0.84    1.42
  -8   6  -8    1.90    2.45
  -8   6  -8   -0.51    1.07
  -8  -6   8    0.27    1.03
  -8  -6   8    0.01    0.61
   8   5  -8    3.21    1.66
   8   5  -8    5.74    2.95
  -8  -5   8    3.89    1.62
  -8   5  -8    1.61    2.36
   8   4  -8    4.21    2.79
   8   4  -8    5.15    1.87
  -8   4  -8    2.13    2.18
  -8  -4   8    5.72    1.78
  -8   4  -8    1.01    1.36
   8   3  -8   27.09    3.30
   8   3  -8   25.72    5.54
   8   3  -8   28.29    1.95
  -8  -3   8   34.23    3.37
   8   2  -8   10.03    2.24
   8   2  -8    7.70    0.86
   8   2  -8    9.30    3.52
  -8  -2   8   10.27    2.12
   8  -1   8   15.75    1.93
   8   1  -8   17.84    4.37
   8   1  -8   15.87    2.74
  -8   1  -8   17.78    2.67
  -8   1  -8   16.91    4.32
  -8  -1   8   20.29    2.81
  -8  -1   8   16.83    2.59
   8   0  -8    2.14    1.29
   8   0  -8    1.68    1.88
  -8   0   8    2.72    1.26
  -8   0  -8   10.04    3.42
  -8   0   8    1.25    1.07
   8  -1  -8   19.01    4.65
   8   1   8   17.85    1.99
   8  -1  -8   18.59    3.01
  -8   1   8   16.20    2.54
  -8  -1  -8   18.30    4.68
  -8   1   8   20.90    2.82
  -8  -1  -8   18.60    2.60
   8  -2  -8    9.86    2.27
   8  -2  -8   12.44    3.82
  -8   2   8    8.50    2.01
  -8   2   8   10.33    2.37
   8  -3  -8   20.96    4.96
   8  -3  -8   31.62    3.55
  -8   3   8   34.16    3.58
  -8   3   8   27.97    3.13
   8   4   8    1.21    0.70
   8  -4  -8    2.21    2.34
   8  -4  -8    4.50    1.81
  -8  -4  -8    2.13    1.16
  -8   4   8    8.13    2.05
   8  -5  -8    4.36    2.87
  -8   5   8    6.19    1.91
   8  -6  -8   -1.15    1.88
   8   6   8   -0.44    0.50
  -8   6   8    0.96    1.13
  -8  -6  -8    0.42    1.04
   8  -7  -8    6.33    3.57
  -8  -7  -8    1.67    1.50
  -9  -7   8    6.61    2.28
  -9  -7   8    4.46    1.21
   9   6  -8   -0.21    1.48
  -9   6  -8    4.65    2.46
  -9  -6   8   -1.40    0.82
  -9  -6   8    0.28    0.70
   9   5  -8   -0.52    1.06
   9   5  -8    0.98    1.97
  -9   5  -8    6.00    2.46
  -9  -5   8    0.53    1.17
  -9   5  -8    2.03    2.69
   9   4  -8    2.63    1.57
   9   4  -8    4.29    2.82
  -9  -4   8    2.09    1.36
  -9   4  -8    0.45    1.33
  -9   4  -8   -0.39    1.87
   9   3  -8   13.16    2.78
   9   3  -8   13.28    1.34
   9   3  -8   16.17    4.77
  -9   3  -8   15.35    4.86
  -9  -3   8   13.27    2.67
  -9   3  -8   16.45    3.46
   9   2  -8    6.03    0.83
   9   2  -8    5.45    2.97
   9   2  -8    5.97    1.92
  -9   2  -8   14.45    3.02
  -9  -2   8    6.71    1.88
  -9   2  -8   11.07    3.83
   9   1  -8   20.46    5.16
   9   1  -8   20.88    3.47
  -9  -1   8   21.48    3.22
   9   0  -8    0.28    1.72
   9   0   8    7.90    1.50
  -9   0  -8    8.93    2.33
  -9   0  -8    8.74    3.54
   9  -1  -8   19.82    3.30
   9  -1  -8   19.87    5.05
  -9   1   8   19.45    2.97
  -9   1   8   18.97    2.99
   9  -2  -8    6.63    3.19
   9  -2  -8    5.96    1.99
  -9  -2  -8   14.26    2.77
  -9   2   8    8.14    2.02
  -9   2   8    5.59    1.88
   9  -3  -8   11.07    3.96
   9  -3  -8   16.07    3.17
   9   3   8   14.64    1.91
  -9   3   8   11.99    2.57
  -9   3   8   14.71    2.93
  -9  -3  -8   11.99    2.52
   9  -4  -8    4.61    2.04
   9  -4  -8    3.06    2.83
  -9   4   8    1.22    1.23
  -9   4   8    2.98    1.53
   9  -5  -8    0.75    2.25
   9   5   8    2.92    1.01
  -9  -5  -8    3.93    1.60
   9   6   8    5.43    1.42
   9  -6  -8   -0.05    2.12
  -9  -6  -8    5.71    2.07
 -10  -6   8    9.38    1.69
 -10  -6   8    9.77    2.57
  10   5  -8    0.49    1.37
 -10   5  -8    1.61    1.82
 -10  -5   8    0.79    0.83
 -10  -5   8    1.09    1.56
  10   4  -8    1.60    1.46
  10   4  -8    1.05    2.45
 -10   4  -8   -0.24    2.20
 -10   4  -8    0.94    1.43
 -10  -4   8    2.66    1.65
  10   3  -8    0.57    2.40
  10   3  -8   -0.78    1.02
 -10   3  -8   -0.84    1.92
 -10  -3   8   -0.66    1.01
 -10   3  -8   -0.38    1.14
  10   2  -8    0.06    2.07
  10   2  -8    1.33    1.34
 -10   2  -8   -0.29    1.09
 -10   2  -8   -1.40    1.64
 -10  -2   8    0.05    1.01
  10   1  -8    5.74    1.95
  10   1  -8    5.80    3.09
 -10  -1   8    7.47    2.14
 -10   1  -8    1.98    2.36
  10   0  -8    8.49    2.29
  10   0  -8    8.92    3.87
 -10   0  -8   20.16    5.54
 -10   0   8    7.58    1.99
  10  -1  -8    3.64    1.90
  10  -1  -8    7.83    3.78
 -10   1   8    7.36    2.08
 -10  -1  -8    0.87    2.33
 -10  -1  -8    2.00    1.47
  10  -2  -8    0.34    1.35
  10  -2  -8    1.45    2.49
  10   2   8   -0.38    0.53
 -10   2   8    1.02    1.06
 -10  -2  -8    0.71    1.10
  10  -3  -8    0.56    1.97
  10   3   8   -0.38    0.60
  10  -3  -8   -0.27    1.21
 -10   3   8   -0.11    1.16
 -10  -3  -8    0.00    0.92
  10  -4  -8    1.60    2.46
  10   4   8    1.02    0.87
  10  -4  -8    2.32    1.67
 -10   4   8    2.27    1.40
 -10  -4  -8    1.54    1.30
  10  -5  -8   -1.26    2.19
 -10  -5  -8    1.58    1.33
 -10   5   8    1.16    1.45
  10  -6  -8   14.02    4.96
 -11  -5   8    0.38    0.81
 -11  -5   8   -0.57    1.25
  11   4  -8    6.32    2.34
  11   4  -8    8.17    4.26
 -11  -4   8    5.17    1.93
 -11   4  -8    7.28    2.58
  11   3  -8   -1.15    2.07
  11   3  -8    1.56    1.57
 -11  -3   8   -0.30    1.03
 -11   3  -8    0.20    1.34
  11   2  -8   -0.10    1.35
  11   2  -8    1.64    2.32
 -11  -2   8   -0.42    1.11
 -11   2  -8    0.60    2.56
 -11   2  -8    0.09    1.33
  11   1  -8    2.70    1.72
  11   1  -8    3.49    3.02
 -11  -1   8    1.72    1.39
 -11   1  -8    1.58    2.75
 -11   1  -8    1.81    1.56
  11   0  -8   37.47    4.49
  11   0  -8   37.78    7.98
  11  -1  -8    1.95    1.65
  11  -1  -8    2.64    3.10
 -11   1   8    1.78    1.38
 -11  -1  -8    3.01    1.63
  11  -2  -8   -0.42    1.32
  11  -2  -8    1.38    2.44
 -11   2   8    0.35    1.04
 -11  -2  -8   -0.18    1.06
  11  -3  -8    0.20    2.13
  11  -3  -8   -0.29    1.27
 -11  -3  -8    0.11    1.10
 -11   3   8    0.26    1.21
  11  -4  -8    2.02    2.87
 -11   4   8    6.22    2.25
 -11  -4  -8    5.48    2.18
  11  -5  -8    0.15    2.69
 -11   5   8   -0.63    1.14
  12   3  -8   -0.37    2.61
 -12  -3   8    0.40    1.38
  12   2  -8   -0.17    1.49
  12   2  -8    1.80    2.95
 -12  -2   8    0.25    1.42
 -12   2  -8    1.53    1.64
  12   1  -8    0.66    1.48
  12   1  -8    0.52    2.68
 -12  -1   8    0.94    1.45
 -12   1  -8    3.75    2.13
  12   0  -8    8.02    4.09
  12   0  -8    6.51    2.52
 -12   0   8    7.07    2.31
  12  -1  -8   -0.57    1.37
  12  -1  -8    2.42    3.26
 -12  -1  -8    2.69    1.67
 -12   1   8   -0.15    1.17
  12  -2  -8    0.00    2.47
 -12   2   8   -0.26    1.22
 -12  -2  -8    0.05    1.31
  12  -3  -8    0.82    2.81
 -12   3   8    1.43    1.42
  13   1  -8    3.52    3.75
 -13  -1   8    1.64    2.02
  13   0  -8    4.01    3.50
 -13   0   8    5.30    2.27
  13  -1  -8    3.24    3.56
   0  -9   9    4.84    1.38
   0   8  -9    0.27    1.55
   0  -8   9   -0.30    0.66
   0   8  -9    0.08    1.01
   0   8  -9    0.78    1.75
   0   7  -9   -0.07    0.90
   0   7  -9   -0.36    1.21
   0  -7   9    0.21    0.80
   0  -7   9    0.07    0.62
   0   7  -9    0.02    1.28
   0  -6   9    0.38    0.78
   0   6  -9    2.19    1.57
   0  -6   9    0.97    0.72
   0   6  -9    1.89    1.08
   0   6  -9    0.85    1.30
   0   5  -9   62.74    5.75
   0  -5   9   60.04    3.72
   0  -5   9   56.27    3.96
   0  -5   9   52.92    4.54
   0   5  -9   51.27    4.06
   0   5  -9   57.24    5.77
   0   4  -9   24.74    3.37
   0   4  -9   26.67    2.54
   0  -4   9   25.18    2.32
   0  -4   9   26.78    2.07
   0   4  -9   27.41    3.56
   0  -4   9   26.46    2.62
   0  -3   9    5.60    0.91
   0  -3   9    5.54    1.13
   0   3  -9    4.65    1.12
   0   3  -9    5.88    1.28
   0   3  -9    6.14    1.81
   0  -3   9    7.16    1.34
   0   3  -9    5.93    1.77
   0   2  -9    1.85    1.03
   0   2  -9    1.55    1.01
   0  -2   9    2.11    0.69
   0   2  -9    2.17    0.75
   0  -2   9    2.16    0.66
   0   2  -9    1.54    0.67
   0  -2   9    2.18    0.63
   0  -1   9   28.58    1.94
   0  -1   9   29.57    1.98
   0   1  -9   29.16    2.84
   0   1  -9   29.00    2.89
   0  -1   9   29.34    2.02
   0   1  -9   29.16    2.14
   0   0   9    0.18    0.30
   0   0  -9    0.21    0.35
   0   0   9    0.01    0.14
   0   0  -9   -0.02    0.30
   0   0  -9   -0.19    0.46
   0   0  -9    0.18    0.39
   0   0   9   -0.11    0.11
   0   0  -9    0.10    0.48
   0  -1  -9   30.40    2.02
   0   1   9   30.76    1.77
   0  -1  -9   29.46    2.51
   0  -1  -9   28.52    2.35
   0  -1  -9   28.35    2.15
   0  -1  -9   29.36    1.92
   0  -2  -9    2.49    0.77
   0  -2  -9    2.42    0.65
   0   2   9    2.41    0.57
   0   3   9    7.21    0.99
   0  -3  -9    6.08    1.17
   0  -4  -9   27.96    2.20
   0   5   9   60.28    3.65
   0   5   9   60.93    3.68
   0  -5  -9   59.33    4.31
   0  -6  -9    0.78    0.85
   0   6   9    1.45    0.64
   0  -7  -9    0.28    1.01
   0   7   9   -0.25    0.43
   0  -8  -9   -0.02    1.07
   0   8   9    0.33    0.60
   0   8   9    0.07    0.57
   0  -9  -9    2.77    2.05
  -1  -9   9    6.69    1.51
  -1   8  -9   14.87    4.28
  -1   8  -9   12.60    3.60
   1   7  -9    6.28    2.72
   1  -7   9    3.06    1.12
   1   7  -9    4.80    1.75
   1   7  -9    5.76    2.42
  -1   7  -9    2.48    1.88
  -1  -7   9    4.64    1.61
  -1  -7   9    6.88    1.44
  -1   7  -9    1.16    1.66
   1   6  -9    1.46    1.44
   1  -6   9    4.67    1.19
   1   6  -9    0.74    1.28
   1   6  -9    1.48    1.05
   1  -6   9    2.26    1.16
  -1   6  -9    3.04    1.95
  -1  -6   9    1.40    1.02
  -1   6  -9    3.59    1.93
  -1  -6   9    0.85    0.73
   1   5  -9    4.24    1.39
   1   5  -9    5.62    2.17
   1   5  -9    3.50    1.76
  -1  -5   9    2.90    0.88
  -1   5  -9    1.67    1.40
  -1   5  -9    0.15    1.14
  -1  -5   9    4.29    1.29
   1  -4   9    3.80    1.09
   1   4  -9    1.41    1.19
   1  -4   9    3.96    0.90
   1  -4   9    3.49    1.08
   1   4  -9    1.89    1.38
  -1   4  -9    3.34    1.07
  -1   4  -9    4.85    1.91
  -1  -4   9    1.41    0.79
  -1   4  -9    4.73    1.70
   1  -3   9    4.23    1.03
   1   3  -9   10.41    1.70
   1  -3   9    4.49    1.00
   1   3  -9   11.06    2.30
   1   3  -9   10.71    2.47
   1  -3   9    4.49    0.85
  -1   3  -9    4.22    1.06
  -1   3  -9    3.15    1.49
  -1   3  -9    3.75    1.47
  -1   3  -9    4.67    1.12
   1  -2   9   40.92    2.92
   1  -2   9   43.11    2.91
   1  -2   9   42.76    2.96
   1  -2   9   42.36    2.59
  -1   2  -9   43.23    2.84
  -1   2  -9   40.55    3.72
  -1   2  -9   41.33    3.14
  -1   2  -9   40.94    4.04
   1   0  -9   -0.22    0.42
   1   0  -9   -0.18    0.31
   1   0   9   -0.07    0.22
   1   0  -9   -0.08    0.28
   1   0   9    0.00    0.15
   1   0   9   -0.06    0.15
   1   0  -9   -0.04    0.34
   1   0  -9   -0.17    0.53
  -1   0  -9   -0.11    0.24
  -1   0  -9    0.07    0.41
  -1   0   9   -0.09    0.14
  -1   0   9    0.00    0.34
  -1   0  -9   -0.17    0.30
  -1   0   9    0.00    0.18
  -1   0  -9    1.09    0.74
   1  -2  -9   21.10    1.93
   1  -2  -9   22.42    1.84
   1  -2  -9   21.53    1.86
   1  -2  -9   21.21    1.40
  -1   2   9   21.38    1.68
   1  -3  -9   10.58    1.52
  -1  -3  -9    5.03    0.87
  -1  -3  -9    4.93    0.56
  -1  -3  -9    4.69    1.09
   1  -4  -9    1.56    0.77
  -1   4   9    1.51    0.45
  -1   4   9    1.54    0.39
  -1  -4  -9    3.95    0.77
   1  -5  -9    5.32    1.44
  -1   5   9    4.14    0.88
  -1   5   9    3.19    0.73
   1   6   9    5.17    1.07
   1  -6  -9    1.03    1.08
  -1  -6  -9    4.96    1.38
  -1   6   9    2.15    0.78
   1  -7  -9    5.83    2.09
   1   7   9    3.30    1.00
  -1   7   9    5.56    1.34
  -1  -7  -9    1.99    1.20
  -1  -8  -9   15.12    3.19
   1  -9  -9    6.10    2.77
  -1  -9  -9    2.95    1.95
  -2  -9   9   -0.53    1.18
  -2  -9   9    0.46    0.75
   2   8  -9    2.76    1.69
   2   8  -9    0.37    1.68
   2   8  -9    2.02    1.98
  -2  -8   9    0.91    1.24
  -2   8  -9   12.60    4.13
  -2   8  -9   11.36    3.27
  -2  -8   9    4.01    1.28
   2   7  -9   -0.31    1.19
   2   7  -9    0.03    1.07
   2   7  -9    0.89    1.52
   2  -7   9    0.05    0.65
  -2  -7   9   -0.73    0.75
  -2   7  -9    0.72    1.30
  -2  -7   9    0.03    0.56
  -2   7  -9   -0.43    1.28
   2   5  -9   32.49    3.24
   2   5  -9   34.80    4.27
   2   5  -9   27.88    4.08
  -2  -5   9   32.26    2.51
  -2  -5   9   32.55    2.92
   2  -4   9   15.43    1.84
   2  -4   9   14.41    1.49
   2   4  -9    8.96    2.45
   2   4  -9   10.60    1.92
   2  -4   9   16.93    1.82
   2   4  -9   10.98    2.81
  -2   4  -9   16.49    3.44
  -2  -4   9   12.28    1.91
  -2   4  -9   10.88    2.54
  -2  -4   9   11.77    1.87
   2   3  -9    7.61    1.98
   2   3  -9    8.36    1.31
   2   3  -9    8.37    1.51
   2   3  -9    5.54    1.93
  -2  -3   9    8.50    1.51
  -2  -3   9    7.69    1.48
   2  -2   9   38.19    2.43
   2  -2   9   42.28    2.36
   2  -2   9   39.51    2.77
  -2   2  -9   39.23    2.57
  -2   2  -9   35.76    3.46
  -2   2  -9   37.83    3.01
  -2   2  -9   36.85    3.97
   2   1  -9   27.37    3.19
   2  -1   9   29.16    2.02
   2  -1   9   31.54    1.82
   2  -1   9   29.48    2.14
   2   1  -9   28.62    2.37
   2   1  -9   33.18    2.53
   2   1  -9   27.87    2.77
  -2   1  -9   30.04    1.92
  -2   1  -9   30.33    2.48
  -2  -1   9   29.68    2.03
  -2   1  -9   33.78    3.41
  -2   1  -9   29.69    2.74
  -2  -1   9   30.33    2.23
  -2  -1   9   28.87    2.26
   2   0   9   -0.02    0.16
   2   0  -9   -0.09    0.30
   2   0  -9   -0.32    0.64
   2   0   9   -0.05    0.19
   2   0   9   -0.06    0.20
   2   0  -9    0.08    0.41
   2   0  -9    0.47    0.46
  -2   0  -9   -0.43    0.54
  -2   0   9    0.10    0.18
  -2   0  -9    0.16    0.42
  -2   0  -9    0.10    0.24
  -2   0  -9   -0.01    0.36
  -2   0   9    0.01    0.16
  -2   0   9   -0.17    0.35
   2  -1  -9   30.55    2.09
   2  -1  -9   31.68    2.94
   2  -1  -9   29.87    2.39
   2  -1  -9   31.55    2.41
  -2   1   9   30.37    1.74
  -2   1   9   31.33    1.87
  -2  -1  -9   30.14    3.21
  -2   1   9   30.47    2.20
  -2  -1  -9   31.37    2.51
  -2  -1  -9   32.86    2.28
   2  -2  -9   10.24    1.29
   2  -2  -9   11.64    1.65
   2  -2  -9    9.44    1.53
  -2   2   9   11.53    1.55
   2  -3  -9    7.02    1.51
   2  -3  -9    8.02    1.49
   2  -3  -9    7.50    1.17
  -2   3   9    6.67    0.73
  -2   3   9    7.62    0.64
   2  -4  -9   11.34    2.13
   2   4   9   15.14    1.07
   2   4   9   16.05    1.27
  -2   4   9   12.32    1.35
  -2  -4  -9   15.21    1.40
  -2   4   9   10.79    1.08
   2   7   9    0.04    0.43
   2  -7  -9    0.18    1.25
  -2  -7  -9    0.00    0.76
  -2   7   9   -0.40    0.50
   2  -8  -9    4.17    2.32
  -2   8   9    2.71    1.16
   2  -9  -9   -0.09    1.73
  -2  -9  -9    0.11    1.24
  -3  -9   9    2.29    1.04
  -3  -9   9    2.71    1.68
   3   8  -9   11.82    3.64
   3   8  -9    7.47    2.33
  -3  -8   9   11.21    1.94
  -3   8  -9    9.43    3.57
  -3  -8   9   10.42    2.47
  -3   8  -9    8.55    3.12
   3   7  -9    1.11    1.21
   3   7  -9    0.52    1.39
   3   7  -9   -0.65    1.29
   3  -7   9    1.17    0.86
  -3   7  -9   -0.14    1.52
  -3   7  -9    0.27    1.18
  -3  -7   9    0.14    0.60
  -3  -7   9    0.22    0.94
   3   6  -9   -0.06    0.94
   3  -6   9    0.43    0.59
   3   6  -9    1.09    1.36
   3   6  -9   -0.26    1.08
  -3   6  -9   -0.23    0.94
  -3   6  -9    0.41    1.41
  -3  -6   9    0.35    0.80
  -3  -6   9    0.48    0.64
   3   5  -9   13.26    1.13
   3   5  -9   16.43    2.63
   3   5  -9   14.72    3.63
   3   5  -9   11.83    2.90
  -3  -5   9   13.31    2.22
  -3  -5   9   13.28    1.55
   3   4  -9    1.15    1.14
   3   4  -9    1.28    0.87
   3  -4   9    8.66    1.63
   3   4  -9    1.81    1.49
   3  -4   9    7.18    1.25
  -3   4  -9    7.76    2.58
  -3   4  -9    4.03    1.58
  -3   4  -9    4.68    1.25
  -3  -4   9    1.79    0.94
   3   3  -9   38.73    3.08
   3   3  -9   38.40    3.17
   3   3  -9   42.49    4.64
   3   3  -9   36.95    3.89
  -3  -3   9   38.44    3.00
  -3  -3   9   40.35    3.41
   3   2  -9   70.17    4.70
   3   2  -9   72.34    5.68
   3   2  -9   69.57    4.64
   3  -2   9   78.23    4.04
   3   2  -9   79.91    6.53
   3  -2   9   76.90    4.60
  -3  -2   9   70.19    4.93
  -3   2  -9   78.45    6.53
  -3   2  -9   78.05    5.00
  -3   2  -9   78.90    5.59
  -3   2  -9   78.60    4.11
  -3  -2   9   76.04    4.41
   3   0  -9    0.22    0.44
   3   0   9    0.30    0.25
   3   0  -9    0.09    0.32
   3   0   9   -0.14    0.25
   3   0  -9   -0.41    0.65
   3   0  -9    0.07    0.47
  -3   0  -9    0.10    0.40
  -3   0   9   -0.11    0.43
  -3   0   9    0.33    0.37
  -3   0   9   -0.14    0.18
  -3   0  -9   -0.08    0.33
  -3   0  -9    0.54    0.82
   3  -1  -9   26.08    2.08
   3  -1  -9   22.02    2.78
   3  -1  -9   23.99    2.26
   3  -1  -9   26.16    1.87
  -3   1   9   22.91    1.57
  -3   1   9   23.16    1.84
  -3   1   9   25.91    2.13
   3   2   9   79.99    4.13
   3  -2  -9   75.33    4.68
   3  -2  -9   72.32    5.62
   3  -2  -9   73.39    4.70
   3   2   9   79.09    3.96
  -3   2   9   71.62    4.02
  -3   2   9   73.46    4.38
  -3   2   9   73.73    4.35
  -3  -2  -9   77.15    4.88
  -3  -2  -9   80.73    4.57
  -3  -2  -9   80.47    6.31
   3  -3  -9   38.91    2.88
   3  -3  -9   36.04    3.59
   3  -3  -9   38.14    3.08
  -3   3   9   37.97    2.31
  -3   3   9   38.99    2.68
   3  -4  -9    2.40    1.17
   3  -4  -9    2.00    1.25
   3  -4  -9    1.34    0.88
  -3   4   9    2.19    0.78
  -3   4   9    1.52    0.49
   3  -5  -9   16.72    3.15
   3  -6  -9    0.16    1.17
   3   6   9    0.15    0.43
  -3   6   9   -0.49    0.41
  -3  -6  -9   -0.48    0.58
   3   7   9    0.35    0.56
   3  -7  -9    0.17    1.41
  -3   7   9    0.61    0.73
  -3  -7  -9    0.30    0.86
   3  -8  -9   12.00    3.69
   3   8   9    8.00    1.63
  -3  -8  -9    6.95    2.12
  -3   8   9    9.44    2.02
   3  -9  -9    3.72    2.54
   4   8  -9    6.97    2.26
   4   8  -9    5.50    2.76
  -4  -8   9    9.23    2.36
  -4  -8   9    7.83    1.64
   4   7  -9    0.43    1.40
   4   7  -9    0.35    1.34
   4   7  -9    1.00    1.12
  -4  -7   9   -0.40    0.90
  -4   7  -9    0.65    1.31
  -4  -7   9   -0.24    0.53
  -4   7  -9    0.35    1.79
   4   6  -9   24.74    4.90
   4   6  -9   17.26    2.97
   4   6  -9   23.24    4.50
  -4  -6   9   19.97    2.10
  -4  -6   9   20.15    2.92
   4   5  -9   11.28    2.19
   4   5  -9   11.21    1.06
   4   5  -9   14.13    3.16
   4   5  -9   10.65    3.20
   4  -5   9    7.78    1.51
  -4   5  -9    5.96    2.54
  -4   5  -9    7.21    2.37
  -4  -5   9   10.79    1.43
  -4  -5   9   11.63    2.20
   4   4  -9   13.00    1.03
   4   4  -9   12.92    3.38
   4   4  -9   10.21    1.99
  -4  -4   9   13.86    2.43
  -4  -4   9   12.18    2.14
   4   3  -9    0.41    1.20
   4   3  -9   -0.48    0.56
   4  -3   9   -0.08    0.41
   4  -3   9   -0.19    0.35
   4   3  -9    0.35    0.52
  -4   3  -9    0.66    1.19
  -4   3  -9   -0.19    0.43
  -4  -3   9    0.50    0.66
  -4  -3   9    0.05    0.61
  -4   3  -9    0.41    0.86
   4  -2   9   30.42    2.19
   4  -2   9   28.11    2.35
  -4   2  -9   31.10    2.66
  -4   2  -9   30.70    3.14
  -4   2  -9   33.28    4.09
   4  -1   9    9.33    1.14
   4   1  -9   15.87    3.18
  -4   1  -9   10.23    1.39
  -4   1  -9    9.18    1.79
  -4   1  -9    9.55    2.50
   4   0  -9    0.15    0.95
   4   0  -9   -0.15    0.45
   4   0   9    0.00    0.26
   4   0  -9   -0.06    0.28
   4   0   9    0.06    0.34
  -4   0  -9   -0.25    0.46
  -4   0   9    0.12    0.25
  -4   0   9    0.01    0.41
  -4   0   9    0.25    0.52
  -4   0  -9    0.21    0.89
  -4   0  -9    0.19    0.39
   4   1   9    8.97    0.93
   4   1   9    9.34    1.19
   4  -1  -9   15.01    2.84
  -4  -1  -9    8.05    1.20
  -4  -1  -9   10.16    1.36
  -4  -1  -9   10.12    2.43
   4  -2  -9    7.89    1.64
   4  -2  -9    6.44    1.98
   4  -2  -9    7.89    1.12
  -4   2   9    9.37    1.30
  -4   2   9    7.51    0.87
  -4   2   9    8.16    1.56
   4   3   9    0.05    0.38
   4   3   9    0.08    0.24
   4  -3  -9   -0.14    0.55
   4  -3  -9    1.08    1.12
  -4  -3  -9   -0.21    0.33
  -4   3   9   -0.07    0.24
  -4   3   9    0.51    0.49
  -4  -3  -9    0.07    0.42
   4  -4  -9   16.19    2.51
   4  -4  -9   11.92    2.66
  -4   4   9   13.08    1.74
   4   5   9    6.77    1.05
   4  -5  -9   10.99    2.74
  -4  -5  -9    7.53    1.54
  -4   5   9   12.31    1.76
   4  -6  -9   19.92    3.93
   4  -6  -9   19.05    3.94
  -4   6   9   22.53    2.56
   4  -7  -9    1.04    1.61
   4   7   9    0.53    0.54
   4  -7  -9   -0.63    1.36
  -4  -7  -9   -0.30    0.82
  -4   7   9    0.37    0.75
   4  -8  -9    7.19    3.14
   4  -8  -9   10.44    3.52
  -4   8   9    9.25    2.17
  -5  -8   9    0.72    1.42
  -5  -8   9    1.69    0.90
   5   7  -9    3.62    2.28
   5   7  -9    1.91    2.00
   5   7  -9    0.10    1.08
  -5   7  -9    3.62    2.16
  -5   7  -9    6.43    3.15
  -5  -7   9    2.97    1.03
  -5  -7   9    1.88    1.30
   5   6  -9    0.46    1.12
   5   6  -9    1.28    1.71
  -5  -6   9   -0.38    0.72
  -5   6  -9    3.54    1.81
  -5   6  -9    1.52    1.91
  -5  -6   9    0.12    0.58
  -5   5  -9   18.38    4.36
  -5   5  -9   16.83    3.37
   5   4  -9   -0.21    1.12
   5  -4   9    1.49    0.77
   5   4  -9    0.21    0.55
   5   4  -9   -0.13    0.72
   5  -4   9    1.46    0.86
  -5   4  -9    1.56    1.56
  -5   4  -9    1.18    1.09
  -5  -4   9    0.26    0.74
  -5   4  -9    1.54    0.90
   5  -3   9   23.42    2.34
   5  -3   9   22.92    2.08
  -5   3  -9   19.07    2.81
  -5   3  -9   22.40    2.30
  -5   3  -9   26.78    4.05
   5  -1   9   23.41    1.87
   5  -1   9   23.62    2.01
  -5   1  -9   23.60    2.20
  -5   1  -9   22.57    3.65
  -5   1  -9   24.27    2.71
   5   0  -9   -0.40    0.97
   5   0   9    0.16    0.32
   5   0  -9   -0.46    0.45
   5   0  -9    0.08    0.32
  -5   0   9    0.10    0.52
  -5   0  -9   -0.02    0.39
  -5   0   9   -0.40    0.54
  -5   0  -9   -0.19    0.43
  -5   0  -9    0.44    1.11
   5  -1  -9    6.24    1.07
   5  -1  -9    4.51    1.98
   5  -1  -9    5.48    1.44
  -5   1   9    6.25    1.39
  -5   1   9    4.72    1.29
   5  -3  -9    5.83    1.63
   5  -3  -9    5.88    2.21
  -5   3   9    6.76    1.47
  -5   3   9    3.99    1.21
   5  -4  -9    0.48    1.10
   5  -4  -9   -0.21    0.70
   5   4   9    1.40    0.55
  -5  -4  -9    1.21    0.70
  -5   4   9    0.06    0.51
   5   6   9    3.02    0.90
   5  -6  -9    0.63    1.41
  -5  -6  -9    1.97    1.08
  -5   6   9   -0.21    0.67
   5  -7  -9    2.60    2.16
   5   7   9    6.37    1.38
  -5  -7  -9    3.89    1.57
  -5   7   9    3.52    1.39
   5  -8  -9    2.62    2.35
  -5  -8  -9    2.44    1.61
  -5   8   9    1.56    1.14
  -6  -8   9    4.18    1.25
  -6  -8   9    4.14    1.95
   6   7  -9    0.00    1.25
   6   7  -9    0.36    1.58
   6   7  -9   -1.18    1.51
  -6  -7   9    0.00    1.00
  -6  -7   9    0.22    0.66
  -6   7  -9    0.04    0.92
  -6   7  -9   -0.80    1.69
  -6   7  -9   -0.49    1.41
   6   6  -9    2.37    1.53
   6   6  -9    4.31    2.53
  -6   6  -9    4.54    2.90
  -6  -6   9    2.32    1.31
  -6  -6   9    4.00    1.13
  -6   6  -9    3.73    2.17
  -6   6  -9    3.35    1.32
   6   5  -9    4.44    2.55
  -6   5  -9   11.35    2.14
  -6   5  -9   13.24    4.16
  -6   5  -9   19.04    3.83
   6   4  -9   34.87    2.07
   6   4  -9   32.74    2.90
   6   4  -9   39.57    5.30
   6   4  -9   33.98    3.50
  -6  -4   9   32.68    3.26
   6  -3   9   12.66    1.70
  -6   3  -9   14.84    2.98
  -6   3  -9   17.28    4.13
   6   2  -9   28.22    3.03
   6   2  -9   30.48    2.37
   6   2  -9   24.54    4.81
  -6  -2   9   25.81    2.75
  -6  -2   9   31.21    3.29
   6   1  -9    2.77    1.19
   6   1  -9    3.08    0.79
   6   1  -9    2.61    1.86
  -6  -1   9    2.60    1.09
  -6   1  -9    6.20    2.55
  -6   1  -9    6.54    1.67
  -6  -1   9    2.60    1.14
   6   0  -9    0.01    0.30
   6   0  -9   -0.40    0.55
   6   0  -9    0.86    1.30
   6   0   9    0.08    0.36
  -6   0  -9    0.24    0.42
  -6   0  -9   -0.42    0.49
  -6   0   9   -0.16    0.60
  -6   0   9    0.19    0.63
  -6   0  -9    0.44    1.25
   6   1   9    6.31    1.08
   6  -1  -9    1.71    1.61
   6  -1  -9    2.31    1.18
   6  -1  -9    3.39    0.78
  -6  -1  -9    5.77    2.40
  -6  -1  -9    6.33    1.18
  -6   1   9    2.03    0.93
  -6   1   9    2.80    1.16
   6  -2  -9   28.94    4.30
   6  -3  -9    1.25    1.41
   6  -4  -9   37.34    3.81
   6  -4  -9   32.96    4.84
  -6   4   9   40.66    3.65
   6   5   9   11.69    1.50
   6  -5  -9    4.97    2.51
  -6  -5  -9   12.24    2.24
   6   6   9    4.12    1.11
   6  -6  -9    3.76    2.36
  -6   6   9    3.38    1.47
  -6  -6  -9    4.83    1.57
   6   7   9   -0.11    0.57
   6  -7  -9    0.32    1.84
  -6   7   9    0.28    0.77
  -6  -7  -9    0.56    1.02
   6  -8  -9    4.80    2.96
   7   7  -9    2.19    1.66
  -7  -7   9    1.19    0.88
  -7   7  -9    0.04    1.60
  -7  -7   9    1.26    1.29
   7   6  -9   10.85    3.81
   7   6  -9    5.67    2.09
  -7  -6   9    8.13    1.54
  -7  -6   9   10.10    2.39
   7   5  -9   -0.14    0.97
   7   5  -9    0.93    1.92
  -7   5  -9    4.59    1.93
  -7   5  -9    4.44    2.80
  -7   5  -9    2.84    1.18
  -7  -5   9    0.02    0.99
   7   4  -9    7.32    2.00
   7   4  -9    5.49    2.68
   7   4  -9    6.88    0.87
  -7  -4   9   10.25    2.31
   7   3  -9    7.52    1.97
   7   3  -9    7.32    0.75
   7   3  -9    4.70    2.67
  -7  -3   9    8.25    1.88
   7   2  -9   25.26    5.17
   7   2  -9   32.17    3.34
  -7  -2   9   29.69    3.11
  -7  -2   9   35.12    3.71
   7   1  -9   11.19    2.22
   7   1  -9    8.37    3.07
   7  -1   9    2.92    0.93
  -7   1  -9    4.75    2.51
  -7  -1   9    9.02    1.91
  -7  -1   9    7.70    1.94
  -7   1  -9    3.06    1.39
  -7   1  -9    3.66    0.97
   7   0  -9    0.01    0.72
   7   0  -9   -0.99    1.09
   7   0   9   -0.34    0.30
  -7   0   9   -0.02    0.65
  -7   0  -9    0.37    0.74
  -7   0  -9   -0.23    0.36
  -7   0  -9    0.19    1.33
  -7   0   9    0.15    0.79
   7  -1  -9    6.80    2.62
   7   1   9    3.49    0.98
   7  -1  -9    8.10    2.01
  -7  -1  -9    4.34    1.46
  -7  -1  -9    3.32    0.93
  -7  -1  -9    1.81    1.79
  -7   1   9    8.64    1.91
  -7   1   9    9.73    2.00
   7  -2  -9   29.43    4.74
   7  -2  -9   31.97    3.45
  -7   2   9   34.40    3.31
  -7   2   9   40.41    3.71
   7  -3  -9    7.67    3.09
   7  -3  -9    6.31    1.90
  -7   3   9    8.08    2.02
  -7   3   9    5.71    1.67
   7  -4  -9   11.92    2.63
   7  -4  -9    9.17    3.33
  -7   4   9    9.51    2.15
   7   5   9    4.21    1.05
   7  -5  -9    0.15    1.65
  -7   5   9    0.97    0.98
  -7  -5  -9    3.92    1.44
   7  -6  -9    8.33    3.41
  -7   6   9    8.38    2.14
   7  -7  -9    0.71    2.23
  -7   7   9    0.61    1.11
  -7  -7  -9    0.68    1.19
  -8  -7   9    1.40    0.88
  -8  -7   9    3.16    1.72
   8   6  -9   -0.29    2.00
   8   6  -9    1.11    1.51
  -8   6  -9    1.17    1.56
  -8  -6   9    0.21    1.17
  -8  -6   9    0.13    0.65
   8   5  -9   19.17    4.96
   8   5  -9   12.54    2.82
  -8  -5   9   16.73    3.06
  -8   5  -9   21.56    4.06
  -8   5  -9   25.02    5.96
   8   4  -9    0.91    0.51
   8   4  -9    2.37    1.47
   8   4  -9    2.66    2.49
  -8   4  -9   -0.46    0.99
  -8   4  -9    0.49    1.89
  -8  -4   9    0.53    0.97
   8   3  -9   -0.49    0.88
   8   3  -9    0.08    0.31
   8   3  -9    0.47    1.97
  -8   3  -9    3.12    2.39
  -8   3  -9    3.70    1.82
  -8  -3   9   -0.20    0.88
   8  -2   9   10.40    1.81
   8   2  -9    0.98    1.86
  -8   2  -9   10.35    3.64
  -8   2  -9    9.10    2.46
   8   1  -9    2.19    1.29
   8   1  -9    2.59    2.24
  -8  -1   9    1.26    1.21
  -8  -1   9    1.32    1.05
  -8   1  -9    7.23    3.17
  -8   1  -9    5.80    1.86
   8   0   9    0.53    0.54
   8   0  -9   -0.35    0.75
   8   0  -9   -1.07    1.22
  -8   0   9   -0.73    0.62
  -8   0  -9    0.24    0.84
  -8   0   9   -0.12    0.72
  -8   0  -9   -0.13    1.60
   8  -1  -9    2.05    1.30
   8  -1  -9    1.29    1.90
  -8   1   9    1.46    1.05
  -8   1   9    1.53    1.14
  -8  -1  -9    6.54    1.78
  -8  -1  -9    4.92    2.68
   8  -2  -9   -0.04    1.68
   8  -2  -9    0.40    1.02
  -8   2   9    0.27    0.79
   8  -3  -9    0.30    1.57
   8   3   9    4.75    1.12
   8  -3  -9    1.85    1.30
  -8  -3  -9    4.11    1.47
  -8   3   9    0.43    0.81
  -8   3   9   -0.48    0.78
   8   4   9    0.44    0.57
   8  -4  -9    2.60    2.41
   8  -4  -9    1.40    1.38
  -8  -4  -9    0.12    0.76
  -8   4   9    1.54    1.25
  -8   4   9    0.20    0.94
   8  -5  -9   13.37    4.30
   8   5   9   20.86    2.23
  -8   5   9   17.37    3.13
  -8  -5  -9   22.28    2.90
   8  -6  -9    0.73    2.31
   8   6   9    1.96    0.94
  -8  -6  -9    1.09    1.14
  -8   6   9    0.92    1.23
   8  -7  -9    3.51    3.04
  -9  -6   9    0.01    0.68
  -9   6  -9    4.46    2.38
  -9  -6   9   -0.02    1.09
   9   5  -9   13.10    4.52
   9   5  -9    9.98    2.61
  -9  -5   9   13.24    2.88
  -9   5  -9    6.49    2.54
   9   4  -9    0.35    1.21
   9   4  -9   -0.73    1.73
  -9  -4   9    1.02    1.16
  -9   4  -9    1.21    2.34
  -9   4  -9    1.38    1.61
   9   3  -9    3.38    1.62
   9   3  -9    6.76    3.40
  -9  -3   9    4.73    1.81
  -9   3  -9    0.77    1.23
  -9   3  -9    0.43    1.92
   9   2  -9    0.35    2.02
   9   2  -9    0.25    1.06
  -9   2  -9    1.59    2.14
  -9   2  -9    3.91    1.86
  -9  -2   9    0.63    1.04
   9   1  -9   21.68    3.54
   9   1  -9   21.97    5.49
  -9  -1   9   22.27    3.29
   9   0  -9   -0.59    0.95
   9   0  -9   -0.12    1.78
   9   0   9    0.35    0.59
  -9   0   9    0.41    0.94
  -9   0  -9   -0.20    0.86
  -9   0  -9   -0.16    1.60
   9  -1  -9   15.44    3.00
   9  -1  -9   18.71    4.82
  -9   1   9   16.22    3.03
  -9   1   9   16.41    2.75
   9  -2  -9    0.75    1.11
   9   2   9    2.67    0.98
   9  -2  -9    0.19    1.84
  -9   2   9    0.00    0.97
  -9  -2  -9    2.03    1.25
  -9   2   9    0.65    1.03
   9  -3  -9    7.68    3.09
   9  -3  -9    3.09    1.65
  -9   3   9    5.66    1.89
  -9  -3  -9    0.84    0.98
  -9   3   9    3.29    1.64
   9  -4  -9    0.52    2.35
   9  -4  -9    1.01    1.39
   9   4   9   -0.02    0.65
  -9   4   9    0.86    1.10
  -9  -4  -9    0.45    0.94
  -9   4   9    0.15    0.99
   9   5   9    5.63    1.47
   9  -5  -9   14.44    4.79
  -9   5   9   13.86    2.92
  -9  -5  -9    4.38    1.76
   9  -6  -9    0.21    2.65
  -9  -6  -9    3.34    1.66
  10   5  -9   11.72    4.74
 -10  -5   9   16.13    3.22
 -10  -5   9   11.07    1.87
  10   4  -9    0.10    1.24
  10   4  -9    0.33    2.18
 -10  -4   9    0.62    1.33
 -10   4  -9    5.40    2.32
  10   3  -9    0.73    1.24
  10   3  -9    0.38    2.28
 -10  -3   9    0.16    1.18
 -10   3  -9    1.63    2.61
 -10   3  -9    2.65    1.73
  10   2  -9    1.04    2.27
 -10   2  -9    6.61    3.50
 -10   2  -9    9.07    2.68
  10   1  -9    2.59    2.70
  10   1  -9    3.09    1.80
 -10  -1   9    0.44    1.23
 -10   1  -9    0.49    1.23
 -10   1  -9    0.33    2.05
  10   0  -9    0.64    1.15
  10   0  -9    0.28    2.02
 -10   0  -9   -0.23    1.84
 -10   0   9   -0.20    0.88
 -10   0  -9    0.22    1.01
  10  -1  -9    3.14    2.90
  10  -1  -9   -0.43    1.03
 -10  -1  -9    0.26    1.03
 -10   1   9    1.78    1.40
 -10  -1  -9   -0.10    2.02
  10  -2  -9    0.85    2.44
  10  -2  -9    2.60    1.63
 -10   2   9    1.62    1.27
 -10  -2  -9    8.24    2.20
  10  -3  -9    0.52    2.01
  10   3   9    1.24    0.83
  10  -3  -9   -0.40    1.12
 -10  -3  -9    1.81    1.39
 -10   3   9    0.21    1.10
  10  -4  -9    1.06    1.54
  10   4   9    3.72    1.28
  10  -4  -9   -0.18    2.35
 -10  -4  -9    3.57    1.64
 -10   4   9    0.11    1.33
  10  -5  -9    8.60    4.17
 -10   5   9   12.28    2.87
  11   4  -9    1.48    2.93
 -11  -4   9    0.76    1.34
  11   3  -9    2.22    1.71
  11   3  -9    2.84    2.85
 -11   3  -9    1.29    1.71
 -11  -3   9    0.44    1.31
  11   2  -9    2.09    3.08
  11   2  -9    1.48    1.60
 -11  -2   9    2.75    1.66
 -11   2  -9    5.44    2.44
  11   1  -9    0.59    2.72
  11   1  -9    0.16    1.30
 -11   1  -9    2.04    1.58
 -11  -1   9    0.04    1.14
  11   0  -9   -0.03    1.24
  11   0  -9    0.41    1.98
 -11   0  -9    0.55    1.32
 -11   0   9    0.16    1.18
 -11   0  -9   -0.30    2.53
  11  -1  -9    0.91    2.51
  11  -1  -9   -0.02    1.22
 -11  -1  -9    1.80    1.48
 -11   1   9    0.24    1.13
  11  -2  -9    1.74    2.90
  11  -2  -9    2.60    1.73
 -11  -2  -9    5.37    1.97
 -11   2   9    1.83    1.48
  11  -3  -9    1.77    1.71
  11  -3  -9    2.45    2.92
 -11  -3  -9    0.84    1.34
 -11   3   9    0.52    1.20
  11  -4  -9    0.07    2.47
 -11   4   9   -0.60    1.31
  12   3  -9    1.62    2.81
 -12  -3   9   -0.06    1.34
  12   2  -9    3.23    3.44
 -12  -2   9    2.85    1.82
  12   1  -9    5.24    3.86
 -12  -1   9    4.21    2.18
  12   0  -9   -0.31    2.37
 -12   0   9    0.80    1.44
  12  -1  -9    5.11    3.77
 -12   1   9    1.05    1.41
  12  -2  -9    1.39    3.03
 -12   2   9    3.45    2.01
  12  -3  -9    1.06    2.86
 -12   3   9    1.37    1.57
   0  -9  10    0.66    0.93
   0   8 -10    1.06    1.26
   0   8 -10    1.05    2.03
   0   8 -10    0.41    1.72
   0  -8  10    0.85    0.90
   0  -7  10    2.09    0.95
   0  -7  10   -0.64    0.76
   0   7 -10   -0.04    1.27
   0   7 -10    1.31    1.18
   0   7 -10    0.44    1.52
   0   6 -10   20.57    4.21
   0   6 -10   26.89    4.28
   0  -6  10   26.12    2.85
   0  -6  10   23.22    2.30
   0   6 -10   20.45    2.72
   0   5 -10    3.07    1.22
   0   5 -10    2.25    1.47
   0   5 -10    2.05    1.59
   0  -5  10    2.66    1.15
   0  -5  10    2.76    0.88
   0   4 -10    0.23    1.00
   0   4 -10    1.79    0.90
   0   4 -10    1.81    1.37
   0   4 -10    1.64    0.93
   0  -4  10    1.04    0.75
   0  -4  10    1.80    0.68
   0  -4  10    1.58    0.84
   0   3 -10    5.13    1.29
   0   3 -10    2.86    1.49
   0  -3  10    3.47    1.00
   0   3 -10    3.46    1.45
   0  -3  10    5.59    1.14
   0   3 -10    3.74    1.10
   0  -2  10    1.75    0.67
   0   2 -10    1.00    0.59
   0   2 -10    2.13    0.79
   0   2 -10    1.61    1.08
   0   2 -10    1.97    1.10
   0  -2  10    0.96    0.54
   0   1 -10   10.58    1.28
   0  -1  10   10.48    1.14
   0   1 -10    9.72    1.96
   0  -1  10    9.70    1.07
   0   1 -10   10.77    1.40
   0   1 -10   10.94    2.00
   0  -1  10    9.51    1.03
   0   0 -10   47.59    3.44
   0   0  10   48.74    2.68
   0   0  10   45.85    2.60
   0   0  10   47.12    2.64
   0   0 -10   48.00    3.86
   0   0 -10   48.53    2.92
   0   0 -10   48.01    3.63
   0  -1 -10   11.10    1.54
   0  -1 -10   10.00    1.16
   0  -1 -10   10.62    1.37
   0  -1 -10    9.34    1.22
   0   1  10   10.94    1.01
   0  -2 -10    1.34    0.62
   0  -2 -10    1.09    0.55
   0  -3 -10    4.60    1.06
   0  -4 -10    1.41    0.61
   0   5  10    2.89    0.68
   0   5  10    2.67    0.67
   0  -5 -10    3.00    1.03
   0   6  10   25.59    2.22
   0  -6 -10   25.66    2.90
   0  -7 -10    0.36    0.97
   0   7  10    0.84    0.66
   0  -8 -10    2.96    1.84
   0   8  10    1.05    0.77
   0  -9 -10    0.64    1.78
  -1  -9  10   -0.07    0.74
   1   8 -10    0.89    1.82
   1  -8  10    2.74    1.18
   1   8 -10    1.26    2.03
   1   8 -10    0.16    1.13
  -1   8 -10    3.85    2.32
  -1  -8  10    1.50    1.01
  -1   8 -10    3.57    2.41
  -1   8 -10    1.80    1.37
  -1  -8  10    1.48    1.27
   1   7 -10   22.14    3.52
   1   7 -10   19.97    4.30
   1   7 -10   25.19    5.02
  -1  -7  10   24.60    3.01
  -1  -7  10   23.45    2.49
   1  -6  10   11.50    2.27
   1  -6  10    7.94    1.57
   1   6 -10    5.96    2.45
   1   6 -10    7.07    1.91
   1   6 -10    5.59    2.40
  -1  -6  10    6.97    1.75
  -1   6 -10    5.63    1.63
  -1   6 -10    9.72    2.85
  -1   6 -10    8.99    3.03
  -1  -6  10    8.12    1.48
   1  -5  10    4.44    1.07
   1   5 -10    2.32    1.24
   1   5 -10    3.24    1.80
   1  -5  10    4.46    1.32
   1   5 -10    1.41    1.38
  -1  -5  10    2.39    1.08
  -1   5 -10    5.44    2.30
  -1   5 -10    5.94    2.19
  -1  -5  10    2.03    0.80
  -1   5 -10    8.27    1.78
   1  -4  10   20.02    2.24
   1  -4  10   17.41    1.71
   1  -4  10   20.95    2.09
  -1   4 -10   15.07    3.04
  -1   4 -10   17.42    3.45
  -1   4 -10   14.43    2.03
  -1   4 -10   17.93    2.09
   1  -3  10    9.96    1.50
   1  -3  10    9.44    1.41
   1  -3  10    9.67    1.12
  -1   3 -10   10.22    1.56
  -1   3 -10   10.73    2.54
  -1   3 -10   10.41    2.25
  -1   3 -10    8.38    1.52
   1  -2  10   22.36    1.98
   1  -2  10   23.21    1.85
   1   2 -10   30.76    2.37
   1   2 -10   32.17    3.37
  -1   2 -10   20.59    2.63
  -1   2 -10   20.66    1.87
  -1   2 -10   23.18    3.05
  -1   2 -10   20.42    2.17
   1   1 -10   28.83    2.28
   1   1 -10   24.79    2.85
   1   1 -10   27.75    2.83
   1   1 -10   27.42    2.36
  -1  -1  10   25.63    1.86
  -1  -1  10   26.41    1.99
  -1  -1  10   24.87    1.99
   1   0 -10  112.01    5.72
   1   0 -10  107.87    6.99
   1   0 -10  111.45    7.06
   1   0 -10  110.02    6.52
  -1   0  10  113.17    5.78
  -1   0  10  108.77    5.30
  -1   0  10  116.32    5.69
  -1   0 -10   97.55    5.20
   1  -1 -10   27.47    2.44
   1  -1 -10   26.23    2.12
   1  -1 -10   26.61    2.30
   1  -1 -10   26.08    2.18
  -1   1  10   28.10    1.94
   1  -2 -10   34.90    2.58
   1  -2 -10   33.70    2.68
   1  -2 -10   32.51    2.46
  -1   2  10   32.32    2.21
   1  -3 -10   31.88    2.67
   1  -3 -10   28.69    2.38
   1  -3 -10   30.93    2.36
  -1   3  10   30.84    2.23
   1  -5 -10    2.32    1.04
   1   5  10    4.68    0.81
   1   5  10    5.31    0.92
  -1  -5 -10    6.55    1.27
   1  -6 -10    9.53    2.23
   1   6  10    9.84    1.25
  -1  -6 -10    8.59    1.77
  -1   6  10    7.89    1.41
   1  -8 -10    2.24    1.70
   1   8  10    3.26    1.07
  -1  -8 -10    2.78    1.68
  -1   8  10    0.57    0.73
   1  -9 -10   -0.52    1.68
   2   8 -10    1.46    1.53
   2  -8  10    1.50    0.99
   2   8 -10    1.69    2.06
   2   8 -10    1.46    1.95
  -2   8 -10    1.63    2.45
  -2  -8  10    1.42    1.35
  -2   8 -10    1.29    1.82
  -2  -8  10    2.89    1.17
  -2   8 -10    0.29    1.21
   2   7 -10   40.42    5.48
   2   7 -10   39.67    5.35
   2   7 -10   32.24    3.98
  -2  -7  10   37.56    3.16
  -2  -7  10   34.21    3.65
   2   6 -10    2.09    1.73
   2   6 -10    0.95    1.15
   2   6 -10    2.49    1.87
  -2  -6  10    1.48    0.81
  -2  -6  10    1.41    1.13
  -2   6 -10    9.86    2.77
   2  -4  10   27.70    2.41
   2  -4  10   20.88    1.95
   2  -4  10   21.95    2.38
  -2   4 -10   23.16    2.53
  -2   4 -10   21.69    2.30
  -2   4 -10   20.72    3.06
  -2   4 -10   26.25    3.82
   2  -3  10    4.36    1.12
   2   3 -10    5.36    2.05
   2  -3  10    5.47    1.01
   2  -3  10    3.62    0.95
   2   3 -10    3.26    1.11
   2   3 -10    2.59    1.40
   2   3 -10    4.19    1.10
  -2   3 -10    4.57    1.15
  -2  -3  10    3.93    1.12
  -2   3 -10    3.71    1.73
  -2  -3  10    4.73    1.22
  -2   3 -10    3.14    1.02
  -2   3 -10    4.19    1.50
   2   0 -10   23.90    2.11
   2   0 -10   22.31    2.71
   2   0 -10   22.76    2.21
   2   0 -10   24.43    2.13
  -2   0  10   22.41    1.75
  -2   0  10   22.18    1.57
  -2   0  10   22.50    1.91
   2  -1 -10   31.37    2.46
   2  -1 -10   29.56    2.88
   2  -1 -10   27.25    2.36
  -2   1  10   27.63    1.67
  -2   1  10   28.82    1.84
  -2   1  10   29.89    2.24
   2  -2 -10   24.85    2.53
   2  -2 -10   24.56    2.20
   2  -2 -10   23.76    2.22
  -2   2  10   26.61    2.09
   2  -3 -10    4.34    1.16
   2  -3 -10    4.31    1.23
   2  -3 -10    3.35    1.00
  -2   3  10    4.81    1.09
  -2  -3 -10    4.98    1.15
  -2  -3 -10    4.27    0.62
   2  -4 -10    2.65    1.16
   2  -4 -10    3.88    1.33
  -2   4  10    3.86    0.63
  -2   4  10    3.69    0.80
   2   6  10   11.05    1.31
  -2  -6 -10    9.44    1.82
   2  -8 -10    1.85    2.05
   2   8  10    0.60    0.70
  -2  -8 -10    1.55    1.20
  -2   8  10    1.24    0.82
   3   8 -10    3.99    2.48
   3   8 -10    5.93    2.92
   3   8 -10    3.59    1.93
  -3  -8  10    4.40    1.29
  -3  -8  10    6.02    2.00
  -3   8 -10    0.42    1.58
   3  -7  10    2.83    1.12
   3   7 -10    6.86    2.78
   3   7 -10    5.73    2.63
   3   7 -10    6.49    2.12
  -3  -7  10    6.52    1.90
  -3  -7  10    6.31    1.43
  -3   7 -10    3.15    2.31
  -3   7 -10    3.34    2.07
   3   6 -10    1.04    1.08
   3   6 -10    0.15    1.18
   3   6 -10   -0.34    1.23
   3  -6  10    0.02    0.59
  -3   6 -10   -0.43    1.30
  -3  -6  10    0.53    0.66
  -3  -6  10    1.00    0.93
  -3   6 -10    0.35    1.11
   3   5 -10    1.01    1.33
   3   5 -10    1.63    1.00
   3  -5  10    1.29    0.76
   3   5 -10    0.62    1.38
  -3   5 -10    1.18    1.26
  -3   5 -10    1.03    0.87
  -3  -5  10    1.24    1.02
  -3  -5  10    1.34    0.65
  -3   5 -10    0.36    1.39
   3   3 -10    3.14    0.97
   3   3 -10    3.39    1.51
   3   3 -10    4.03    1.84
   3   3 -10    3.38    1.17
  -3   3 -10    8.64    2.06
  -3   3 -10    8.59    1.45
  -3   3 -10    9.02    2.49
  -3  -3  10    2.59    1.04
  -3  -3  10    3.79    1.22
   3  -2  10   21.21    1.92
   3  -2  10   19.63    1.63
  -3   2 -10   21.81    3.19
  -3   2 -10   20.54    1.77
  -3   2 -10   18.74    2.46
  -3   2 -10   20.24    2.15
   3   1 -10   69.07    6.05
   3   1 -10   73.12    5.36
   3   1 -10   76.88    4.73
   3   1 -10   77.94    4.77
  -3  -1  10   73.02    4.36
  -3  -1  10   67.22    4.64
   3   0 -10    8.76    2.20
   3   0 -10    7.25    1.37
   3   0 -10    7.15    1.46
   3   0 -10    7.44    1.30
  -3   0  10    7.88    1.15
  -3   0  10    6.70    0.82
  -3   0  10    7.50    1.35
   3  -1 -10   69.33    5.49
   3  -1 -10   69.26    4.39
   3  -1 -10   69.06    4.39
  -3   1  10   65.04    4.08
  -3   1  10   73.73    4.15
  -3   1  10   67.36    3.75
   3  -2 -10    6.55    1.45
   3  -2 -10    5.97    1.17
   3  -2 -10    4.78    1.57
  -3   2  10    5.70    0.88
  -3   2  10    5.56    0.64
  -3   2  10    5.59    1.19
   3  -3 -10    4.78    1.07
   3  -3 -10    2.73    1.28
   3  -3 -10    2.35    0.99
  -3   3  10    3.18    0.58
  -3   3  10    3.71    1.04
  -3   3  10    4.44    0.90
   3  -5 -10    0.73    1.09
   3  -5 -10    0.67    1.17
   3   5  10    1.23    0.53
  -3   5  10    0.85    0.65
  -3  -5 -10    0.91    0.66
   3  -6 -10    0.61    1.19
   3   6  10    0.05    0.38
  -3  -6 -10    0.47    0.70
  -3   6  10    0.78    0.70
   3  -7 -10    6.84    2.65
   3   7  10    3.11    1.01
  -3   7  10    4.51    1.37
  -3  -7 -10    2.61    1.30
   3  -8 -10    5.42    2.70
  -3   8  10    5.12    1.58
  -4   8 -10    0.00    1.64
  -4  -8  10    3.37    1.70
  -4  -8  10    2.30    1.12
   4   7 -10    5.09    1.84
   4   7 -10    5.64    2.81
   4   7 -10    8.44    3.16
  -4  -7  10    4.86    1.30
  -4  -7  10    4.77    1.81
   4   6 -10    7.27    2.11
   4   6 -10    4.50    2.23
   4   6 -10    6.39    2.79
  -4   6 -10    2.49    1.82
  -4   6 -10    2.18    2.10
  -4  -6  10    8.91    1.57
  -4  -6  10    6.42    1.78
   4   5 -10    1.59    1.59
   4   5 -10    0.56    0.94
   4   5 -10   -0.23    1.04
   4  -5  10    0.98    0.72
  -4  -5  10    0.42    0.54
  -4   5 -10    0.11    0.66
  -4  -5  10    1.64    1.08
  -4   5 -10    1.13    1.25
  -4   5 -10    0.65    1.41
   4  -4  10    3.23    1.14
   4   4 -10    0.18    1.25
   4   4 -10    0.06    0.70
   4  -4  10    2.85    0.94
   4   4 -10    0.61    1.02
   4   4 -10    0.68    0.64
  -4  -4  10    0.81    0.90
  -4   4 -10    3.57    1.69
  -4   4 -10    1.99    0.94
  -4   4 -10    3.91    2.10
   4   3 -10   45.57    4.30
   4   3 -10   49.06    3.32
   4   3 -10   42.96    4.93
   4   3 -10   45.87    3.65
   4  -3  10   34.25    2.71
   4  -3  10   36.01    3.12
  -4   3 -10   33.18    3.15
  -4  -3  10   46.26    3.80
  -4   3 -10   28.78    3.68
  -4   3 -10   30.93    4.51
  -4  -3  10   46.81    3.41
   4  -2  10    8.71    1.29
   4  -2  10    7.30    1.27
  -4   2 -10    6.99    1.45
  -4   2 -10    7.64    2.45
  -4   2 -10    9.33    2.01
   4   1 -10    7.38    1.31
   4  -1  10    5.43    1.03
   4   1 -10    9.88    2.59
   4   1 -10    8.55    1.78
   4   1 -10    7.96    1.68
  -4   1 -10    5.71    1.46
  -4  -1  10    7.54    1.50
  -4   1 -10    7.40    1.40
  -4   1 -10    6.65    2.18
  -4  -1  10    9.76    1.70
   4   0 -10   39.57    3.06
   4   0 -10   36.56    3.04
   4   0 -10   38.24    4.23
   4   0 -10   37.44    2.76
  -4   0  10   36.33    2.91
  -4   0 -10   29.03    4.07
  -4   0  10   41.77    3.05
  -4   0 -10   27.72    2.91
   4   1  10    6.08    0.79
   4  -1 -10    8.94    1.70
   4  -1 -10    7.83    1.12
   4  -1 -10    6.35    1.99
   4   1  10    6.31    1.12
  -4  -1 -10    5.29    1.18
  -4  -1 -10    6.36    2.07
  -4  -1 -10    5.87    1.21
  -4   1  10    8.15    1.52
  -4   1  10    6.80    0.83
  -4   1  10    7.91    1.42
   4  -2 -10    1.96    1.30
   4  -2 -10    1.73    0.96
   4  -2 -10    1.63    0.68
  -4   2  10    1.58    0.70
  -4   2  10    1.36    0.44
  -4   2  10    2.29    0.95
  -4  -2 -10    7.16    2.27
   4   3  10   34.57    2.42
   4  -3 -10   47.71    3.62
   4   3  10   33.68    2.76
   4  -3 -10   48.08    4.55
   4  -3 -10   43.89    3.08
  -4  -3 -10   33.78    3.05
  -4   3  10   45.54    3.26
  -4  -3 -10   33.57    2.81
  -4   3  10   45.40    3.19
  -4   3  10   42.18    2.54
   4  -4 -10    0.01    0.77
   4  -4 -10   -0.53    0.79
   4   4  10    2.57    0.62
  -4  -4 -10    3.02    0.88
  -4   4  10    0.12    0.50
   4  -5 -10    0.68    1.13
   4   5  10    0.42    0.42
  -4  -5 -10    1.01    0.74
  -4   5  10    0.89    0.75
   4  -6 -10    5.96    2.33
  -4   6  10    8.78    1.85
   4  -7 -10    4.70    2.52
   4  -7 -10    6.77    2.68
  -4   7  10    6.49    1.64
   4  -8 -10    1.69    2.08
   4  -8 -10    3.41    2.22
  -4  -8 -10   -0.02    0.95
  -4   8  10    2.81    1.31
  -5  -8  10    1.72    1.51
  -5   8 -10    0.21    1.83
  -5  -8  10    2.36    1.07
   5   7 -10    4.20    2.51
   5   7 -10    5.22    2.02
   5   7 -10    6.11    2.83
  -5   7 -10    1.30    1.80
  -5  -7  10    6.06    1.44
  -5   7 -10    1.93    2.43
  -5  -7  10    6.30    1.93
   5  -6  10    1.14    0.87
   5   6 -10    8.64    3.23
   5   6 -10    7.47    2.12
   5   6 -10   11.13    3.31
  -5  -6  10    6.53    1.89
  -5  -6  10    8.31    1.53
  -5   6 -10    4.00    1.45
  -5   6 -10    1.86    2.01
   5  -5  10    3.43    1.21
   5   5 -10    0.99    1.10
   5   5 -10    1.54    0.93
   5   5 -10    2.54    0.54
   5   5 -10    0.59    1.64
  -5   5 -10    2.30    1.60
  -5  -5  10    1.64    0.82
  -5   5 -10    0.68    1.57
  -5   5 -10    3.07    1.25
  -5  -5  10    3.36    1.45
   5   4 -10    8.17    1.95
   5   4 -10    6.52    2.66
   5   4 -10    7.23    1.51
  -5  -4  10    6.60    1.66
  -5   4 -10    0.41    1.27
   5   3 -10   22.49    2.73
   5   3 -10   21.28    4.39
   5   3 -10   24.04    2.28
  -5  -3  10   26.70    3.05
  -5  -3  10   22.96    2.55
   5  -2  10   16.32    1.65
   5  -2  10   12.31    1.58
  -5   2 -10   15.47    2.40
  -5   2 -10   14.10    1.80
  -5   2 -10   12.15    3.28
   5   1 -10   12.57    2.25
   5   1 -10   11.68    3.19
  -5  -1  10   12.67    2.19
  -5  -1  10   11.14    1.95
   5  -1 -10   13.54    2.32
   5  -1 -10   11.69    1.35
   5  -1 -10   10.95    2.81
  -5   1  10   12.82    1.80
  -5   1  10    9.44    1.77
   5  -2 -10    4.95    1.45
   5  -2 -10    5.74    1.12
   5  -2 -10    4.51    2.01
  -5  -2 -10   13.88    3.32
  -5   2  10    4.99    1.34
  -5   2  10    5.81    1.40
   5  -3 -10   19.86    2.58
   5  -3 -10   26.35    3.77
  -5   3  10   21.89    2.39
  -5   3  10   23.05    2.45
   5  -4 -10    7.31    1.98
   5  -4 -10    6.41    2.40
  -5   4  10    6.97    1.58
   5   5  10    2.92    0.80
   5  -5 -10    1.03    1.47
  -5  -5 -10    2.29    1.05
  -5   5  10    1.18    0.90
   5  -6 -10    8.38    2.94
  -5   6  10    9.51    2.08
   5  -7 -10    4.76    2.45
  -5   7  10    7.05    1.87
   5  -8 -10    0.76    2.03
  -5  -8 -10   -0.10    1.02
   6   7 -10   -0.71    1.80
   6   7 -10   -0.27    1.45
   6   7 -10   -0.66    1.19
  -6  -7  10   -0.25    1.07
  -6   7 -10   -0.07    1.46
  -6  -7  10   -0.32    0.64
  -6   7 -10    0.38    0.99
   6   6 -10    5.12    1.50
   6   6 -10    6.08    3.06
   6   6 -10    4.72    1.91
  -6   6 -10    2.98    2.44
  -6   6 -10    2.60    1.29
  -6  -6  10    5.24    1.27
  -6  -6  10    4.98    1.79
  -6   6 -10    2.90    2.07
   6   5 -10    2.20    2.12
   6   5 -10    2.58    1.07
   6   5 -10    3.64    1.55
  -6  -5  10    3.33    1.53
  -6   5 -10   -0.38    1.12
  -6   5 -10    0.59    1.66
   6   4 -10   10.74    2.35
   6   4 -10   13.61    3.89
   6   4 -10   14.09    1.81
  -6  -4  10   15.59    2.62
  -6   3 -10   30.19    4.91
   6  -2  10    9.41    1.61
   6  -2  10   10.98    1.67
  -6   2 -10    8.47    3.00
  -6   2 -10   10.59    1.60
  -6   2 -10   11.54    2.49
   6   1 -10    1.20    1.69
   6   1 -10    2.08    0.72
   6  -1  10    5.56    1.16
   6   1 -10    1.83    1.16
  -6   1 -10    4.82    2.30
  -6  -1  10    1.90    1.19
  -6   1 -10    6.12    1.27
  -6   1 -10    5.76    1.62
  -6  -1  10    0.86    0.92
   6   0 -10    4.89    2.21
   6   0 -10    1.72    1.06
   6   0 -10    3.05    0.80
  -6   0 -10    1.19    0.91
  -6   0  10    3.96    1.31
  -6   0  10    4.12    1.25
  -6   0 -10    0.33    1.30
   6  -1 -10    1.86    0.68
   6  -1 -10    1.36    1.50
   6  -1 -10    2.14    1.16
  -6   1  10    1.80    1.06
  -6   1  10    1.26    0.90
  -6  -1 -10    5.39    1.16
  -6  -1 -10    4.48    2.16
  -6  -2 -10   10.10    3.21
   6  -3 -10    6.22    1.82
   6  -3 -10    4.73    2.35
  -6   3  10    5.05    1.53
  -6   3  10    5.53    1.53
   6  -4 -10   12.58    3.44
   6  -4 -10   13.64    2.67
  -6   4  10   13.61    2.43
  -6   4  10   12.81    2.34
   6  -5 -10    1.68    1.89
  -6   5  10    4.33    1.52
   6  -6 -10    5.60    2.64
   6   6  10    2.36    0.88
  -6   6  10    7.57    2.00
  -6  -6 -10    2.35    1.27
   6  -7 -10   -0.25    1.73
  -6  -7 -10   -0.10    0.95
  -6   7  10   -0.30    0.84
   6  -8 -10    0.74    2.23
  -7   7 -10    7.52    2.96
  -7  -7  10    3.40    1.15
  -7  -7  10    2.31    1.64
   7   6 -10    0.54    1.95
   7   6 -10    0.49    1.43
  -7   6 -10    0.10    2.18
  -7  -6  10    0.98    1.27
  -7  -6  10    0.33    0.75
  -7   6 -10    0.02    1.43
   7   5 -10   -0.19    1.15
   7   5 -10    0.96    1.92
  -7   5 -10   -0.68    1.60
  -7  -5  10    0.04    1.01
  -7   5 -10    0.24    1.20
   7   4 -10   26.85    3.44
   7   4 -10   22.25    5.25
  -7   4 -10   38.64    4.42
  -7   4 -10   33.61    3.13
  -7   4 -10   35.16    5.79
  -7  -4  10   27.99    3.25
  -7   3 -10   12.49    4.02
  -7   3 -10   14.33    3.13
   7   2 -10    0.77    1.03
   7   2 -10    2.06    2.03
  -7  -2  10    2.68    1.30
  -7   2 -10   10.82    3.67
  -7  -2  10    1.12    1.11
   7   1 -10    7.77    3.06
   7   1 -10    7.33    1.87
  -7  -1  10    6.66    1.66
  -7   1 -10    0.81    1.00
  -7   1 -10    0.80    1.75
  -7  -1  10    6.79    1.84
   7   0 -10   21.48    3.14
   7   0 -10   22.79    4.73
   7   0  10    8.80    1.33
  -7   0 -10    9.77    1.42
  -7   0 -10   10.81    3.52
  -7   0 -10    9.69    2.16
   7  -1 -10    6.75    2.70
   7  -1 -10    7.46    2.02
  -7   1  10    5.29    1.55
  -7   1  10    7.46    1.89
   7   2  10    9.41    1.37
  -7  -2 -10   10.27    3.46
  -7  -2 -10    8.49    1.87
  -7  -2 -10    9.34    1.45
   7   4  10   33.49    2.62
   7  -4 -10   27.74    3.54
   7  -4 -10   26.64    5.39
  -7  -4 -10   30.54    3.13
  -7   4  10   30.67    3.40
  -7   4  10   21.54    3.31
   7   5  10   -0.13    0.41
   7  -5 -10    0.23    1.65
  -7   5  10    0.22    0.86
  -7  -5 -10    0.53    0.90
   7   6  10    1.38    0.82
   7  -6 -10   -0.01    1.78
  -7   6  10    1.17    1.10
  -7  -6 -10    0.38    0.92
   7  -7 -10    2.57    2.65
  -7  -7 -10    5.64    2.03
  -7   7  10    4.74    1.90
  -8  -7  10    0.17    0.78
   8   6 -10    1.64    2.47
   8   6 -10    0.19    1.36
  -8  -6  10    0.91    0.83
  -8  -6  10    1.75    1.39
  -8   6 -10    2.21    1.76
   8   5 -10   -0.54    1.85
   8   5 -10    0.93    1.41
  -8   5 -10    0.63    1.38
  -8  -5  10    0.16    1.18
  -8   5 -10   -0.55    1.97
   8   4 -10   19.62    3.47
   8   4 -10   25.36    5.55
  -8   4 -10   13.24    3.24
  -8   4 -10   10.44    4.01
   8   3 -10    0.68    1.08
   8   3 -10    1.58    2.26
  -8   3 -10    2.61    2.47
  -8   3 -10    1.78    1.40
  -8  -3  10   -0.53    0.86
   8  -2  10    0.93    0.73
   8   2 -10   -0.46    0.84
   8   2 -10    0.87    1.87
  -8   2 -10    0.86    1.17
  -8   2 -10    1.10    1.98
  -8  -2  10    0.96    1.08
   8   1 -10   -0.05    1.62
  -8   1 -10    9.01    3.41
  -8   1 -10   10.91    2.47
   8   0 -10    7.38    2.12
   8   0 -10    6.11    2.97
  -8   0  10    5.37    1.75
  -8   0  10    7.21    2.00
  -8   0 -10    0.72    1.92
   8   1  10   10.90    1.57
  -8  -1 -10   10.39    2.25
  -8  -1 -10    6.36    3.09
   8  -2 -10    0.34    1.08
   8  -2 -10    0.36    1.67
   8   2  10    0.91    0.66
  -8  -2 -10    0.49    0.91
  -8   2  10    1.29    1.15
  -8   2  10    1.77    1.19
   8   3  10    1.09    0.69
   8  -3 -10   -0.63    0.85
   8  -3 -10    0.40    1.69
  -8   3  10   -0.10    0.97
  -8  -3 -10    0.77    0.93
  -8   3  10    0.68    0.89
   8   4  10   13.51    1.81
   8  -4 -10   21.71    5.17
   8  -4 -10   21.13    3.60
  -8   4  10   21.51    3.26
  -8  -4 -10   10.94    2.36
   8   5  10    1.97    0.89
   8  -5 -10    0.63    1.75
  -8  -5 -10    0.88    0.96
  -8   5  10    0.28    0.95
  -8   5  10   -0.41    0.95
   8  -6 -10    4.16    2.99
  -8   6  10    1.61    1.36
  -8  -6 -10    2.00    1.34
   9   6 -10   -0.39    2.42
  -9  -6  10    0.43    1.20
  -9  -6  10    0.02    0.70
   9   5 -10    4.82    3.12
   9   5 -10    3.88    1.95
  -9  -5  10    3.28    1.87
  -9   5 -10    6.41    2.52
   9   4 -10    2.74    2.81
   9   4 -10    4.26    1.94
  -9   4 -10    0.45    2.35
  -9   4 -10    2.76    1.89
  -9  -4  10    4.28    1.81
   9   3 -10    6.51    3.48
   9   3 -10    5.78    2.02
  -9  -3  10    6.18    2.01
  -9   3 -10    5.88    3.56
  -9   3 -10    2.10    1.62
   9   2 -10    0.07    1.12
   9   2 -10    0.30    1.88
  -9   2 -10    1.00    1.22
  -9   2 -10   -0.73    1.73
  -9  -2  10    0.92    1.15
   9   1 -10   -1.30    1.68
   9   1 -10    1.07    1.28
  -9   1 -10   -0.38    1.89
  -9   1 -10    0.24    1.04
  -9  -1  10    0.56    1.15
   9   0  10    6.80    1.50
  -9   0 -10    6.52    2.14
  -9   0 -10    4.61    2.91
   9  -1 -10    0.71    2.06
   9  -1 -10    0.46    1.34
   9   1  10   -0.06    0.52
  -9  -1 -10    0.76    2.03
  -9   1  10   -0.02    0.93
  -9  -1 -10   -0.34    0.85
  -9   1  10    0.21    1.05
   9  -2 -10   -0.10    1.57
   9   2  10    0.95    0.77
   9  -2 -10    1.09    1.26
  -9   2  10   -0.22    1.01
  -9  -2 -10    1.33    1.09
  -9   2  10    2.46    1.33
   9  -3 -10    2.71    1.65
   9  -3 -10    3.89    2.75
   9   3  10    3.46    1.15
  -9   3  10    3.92    1.60
  -9   3  10    6.04    1.91
  -9  -3 -10    3.69    1.58
   9   4  10    3.83    1.23
   9  -4 -10    3.41    2.78
   9  -4 -10    6.44    2.34
  -9   4  10    4.20    1.84
  -9   4  10    2.50    1.55
  -9  -4 -10    2.29    1.29
   9  -5 -10    3.44    3.14
  -9  -5 -10    4.80    1.75
  -9   5  10    3.80    1.71
  -9   5  10    3.51    1.70
   9  -6 -10    0.17    2.41
  -9   6  10    0.57    1.33
  10   5 -10    0.48    2.44
 -10  -5  10   -0.30    1.35
  10   4 -10    1.18    1.51
  10   4 -10   -0.17    2.15
 -10   4 -10   10.65    3.13
 -10  -4  10   -0.54    1.07
  10   3 -10   13.37    4.64
  10   3 -10    9.45    2.64
 -10  -3  10   10.35    2.61
  10   2 -10   -0.59    1.20
  10   2 -10    0.60    2.07
 -10   2 -10   -0.32    1.14
 -10  -2  10   -0.26    1.20
 -10   2 -10    0.81    2.26
  10   1 -10    9.39    2.56
  10   1 -10    5.94    3.30
 -10   1 -10    2.11    2.49
 -10  -1  10    6.21    2.03
 -10   0 -10   19.98    3.69
 -10   0 -10   14.91    4.85
  10  -1 -10    6.48    2.29
  10  -1 -10    4.03    3.08
 -10   1  10    5.72    1.91
  10  -2 -10   -0.31    1.18
  10  -2 -10   -0.28    2.03
  10   2  10    0.20    0.67
 -10  -2 -10    0.40    0.99
 -10   2  10    0.13    1.09
  10  -3 -10    9.60    4.19
  10  -3 -10   12.75    3.12
 -10   3  10    8.68    2.37
  10  -4 -10   -0.20    1.47
  10  -4 -10    0.44    2.14
 -10   4  10    1.05    1.30
  10  -5 -10    0.01    2.29
 -10   5  10   -0.52    1.33
  11   4 -10   -0.24    2.30
 -11  -4  10    0.06    1.31
  11   3 -10    6.38    3.97
 -11  -3  10    7.86    2.49
  11   2 -10    0.12    2.37
  11   2 -10    2.85    2.02
 -11  -2  10    0.70    1.46
 -11   2 -10    1.22    1.63
  11   1 -10    0.02    2.21
  11   1 -10    1.29    1.57
 -11   1 -10    0.56    1.38
 -11  -1  10   -0.04    1.29
  11   0 -10    0.72    2.40
  11   0 -10    0.81    1.42
 -11   0  10   -0.84    1.15
 -11   0 -10    6.12    2.32
  11  -1 -10   -0.91    1.20
  11  -1 -10   -0.50    2.08
 -11   1  10    0.51    1.31
 -11  -1 -10    0.44    1.28
  11  -2 -10    1.97    2.68
  11  -2 -10    0.10    1.65
 -11   2  10    1.06    1.28
 -11  -2 -10    0.03    1.13
  11  -3 -10   11.98    4.81
 -11   3  10    8.39    2.41
  11  -4 -10   -1.08    2.26
 -11   4  10    1.33    1.59
  12   2 -10    0.37    2.97
 -12  -2  10    1.16    1.66
  12   1 -10    0.84    2.64
 -12  -1  10    1.81    1.59
  12   0 -10    8.05    4.32
 -12   0  10    8.37    2.42
  12  -1 -10    2.43    3.44
 -12   1  10    4.02    2.00
  12  -2 -10    3.58    3.78
 -12   2  10    1.01    1.62
   0   8 -11   29.95    5.51
   0   8 -11   24.05    3.94
   0  -8  11   27.79    2.95
   0  -7  11    0.40    0.75
   0  -7  11   -0.15    0.97
   0   7 -11    0.19    1.46
   0   7 -11   -0.42    1.56
   0   7 -11    0.64    1.13
   0  -6  11   21.65    3.02
   0   6 -11   16.31    4.17
   0  -6  11   16.85    2.04
   0   6 -11   20.76    4.23
   0   6 -11   19.12    3.08
   0   5 -11    0.03    1.19
   0  -5  11    0.39    0.76
   0   5 -11   -0.41    0.80
   0  -5  11   -0.27    0.45
   0   5 -11    0.70    0.83
   0   5 -11    0.15    0.98
   0   4 -11   -0.91    0.79
   0  -4  11    0.00    0.59
   0   4 -11    0.77    0.84
   0   4 -11    0.11    0.56
   0  -4  11   -0.34    0.48
   0   4 -11   -0.24    0.97
   0  -4  11    0.58    0.52
   0  -3  11    0.40    0.55
   0   3 -11    0.61    0.61
   0   3 -11    0.70    1.03
   0  -3  11    0.59    0.60
   0   3 -11    0.67    0.63
   0   3 -11    0.59    1.09
   0  -2  11   27.16    2.17
   0   2 -11   27.77    3.35
   0   2 -11   27.24    2.60
   0   2 -11   30.35    3.34
   0   2 -11   32.98    2.51
   0  -2  11   29.03    2.40
   0   1 -11   33.17    2.86
   0   1 -11   33.41    3.45
   0  -1  11   32.74    2.23
   0  -1  11   35.53    2.37
   0   1 -11   34.00    3.30
   0   1 -11   36.37    2.58
   0  -1  11   34.23    2.45
   0   0 -11    0.12    0.54
   0   0 -11    0.31    0.64
   0   0 -11    0.35    0.45
   0   0  11    0.18    0.23
   0   0  11    0.29    0.21
   0   0  11    0.10    0.34
   0   0 -11    0.25    0.44
   0  -1 -11   33.01    2.59
   0  -1 -11   36.16    2.36
   0  -1 -11   32.91    2.79
   0  -2 -11   26.23    2.38
   0  -3 -11    0.58    0.52
   0   5  11    0.45    0.35
   0  -5 -11    0.59    0.70
   0   5  11    0.63    0.39
   0   6  11   16.68    1.72
   0  -6 -11   17.61    2.41
   0  -7 -11    0.40    1.14
   0   7  11    0.58    0.58
   0  -8 -11   29.06    4.11
   1   8 -11   -0.36    1.63
   1  -8  11    2.09    1.14
  -1  -8  11    0.10    0.76
  -1   8 -11    2.62    2.31
  -1  -8  11   -0.68    1.14
  -1   8 -11    2.59    1.66
   1   7 -11   13.62    3.78
   1   7 -11   10.43    2.69
   1   7 -11    6.59    2.94
  -1  -7  11   11.05    2.42
  -1  -7  11   10.34    1.89
   1   6 -11   24.92    4.13
   1   6 -11   19.39    3.22
   1   6 -11   19.87    4.28
  -1  -6  11   21.63    2.68
  -1  -6  11   16.75    2.00
   1  -5  11   13.91    1.72
   1  -5  11   13.60    2.23
  -1   5 -11   11.54    3.00
  -1   5 -11   12.76    2.33
  -1   5 -11   15.99    2.51
  -1   5 -11   14.86    3.67
   1   4 -11   20.99    2.44
   1   4 -11   19.41    2.32
   1   4 -11   22.53    3.39
   1   4 -11   21.55    3.35
  -1  -4  11   20.14    2.47
  -1  -4  11   17.00    2.09
  -1  -4  11   19.10    1.80
   1   3 -11    2.19    0.93
   1  -3  11    0.00    0.42
   1   3 -11    2.31    1.38
   1   3 -11    1.87    0.79
   1   3 -11    2.12    1.27
   1  -3  11    0.19    0.39
   1  -3  11   -0.22    0.46
  -1  -3  11    1.81    0.83
  -1  -3  11    2.60    0.98
  -1   3 -11   -0.24    0.48
  -1   3 -11    0.48    0.90
  -1   3 -11    0.11    0.49
  -1   3 -11   -0.10    0.80
   1   2 -11   15.52    2.49
   1   2 -11   15.15    1.85
   1   2 -11   16.64    2.65
   1   2 -11   14.96    1.86
   1  -2  11   22.16    1.76
  -1  -2  11   14.24    1.73
  -1   2 -11   22.00    1.91
  -1   2 -11   22.37    2.22
  -1  -2  11   13.97    1.62
  -1   2 -11   20.88    2.97
   1   1 -11    2.49    0.88
   1   1 -11    2.27    0.83
   1   1 -11    2.05    1.11
   1   1 -11    1.84    1.00
  -1  -1  11    2.46    0.69
  -1   1 -11    0.25    0.76
  -1  -1  11    2.56    0.79
  -1  -1  11    2.32    0.61
   1   0 -11   -0.10    0.36
   1   0 -11    0.46    0.56
   1   0 -11    0.04    0.39
   1   0  11    0.13    0.20
   1   0 -11    0.25    0.64
   1   0  11   -0.07    0.19
  -1   0  11    0.12    0.39
  -1   0 -11   -0.31    0.41
  -1   0  11    0.04    0.19
  -1   0 -11    0.25    0.67
  -1   0  11   -0.02    0.21
  -1   0 -11   -0.10    0.38
  -1   0 -11   -0.06    0.36
   1  -1 -11    2.00    0.78
   1  -1 -11    2.23    0.91
   1  -1 -11    2.36    0.83
  -1   1  11    2.25    0.68
   1  -2 -11   16.19    1.69
   1  -2 -11   18.03    1.86
   1  -2 -11   15.01    1.68
   1  -3 -11    2.53    0.86
   1  -3 -11    2.87    0.92
   1  -4 -11   21.65    2.18
   1  -4 -11   21.09    2.10
   1   6  11   54.55    3.53
  -1  -6 -11   52.93    4.22
   1  -7 -11   11.29    2.76
  -1   7  11    7.81    1.52
   1  -8 -11    0.26    1.64
  -1  -8 -11    2.22    1.57
   2  -8  11    1.30    0.92
   2   8 -11    2.38    2.24
  -2   8 -11    3.52    2.33
  -2  -8  11    3.17    1.70
  -2  -8  11    2.49    1.18
   2   7 -11    0.04    1.50
   2   7 -11    0.35    1.14
   2  -7  11    5.39    1.46
   2   7 -11    1.33    1.69
  -2  -7  11    0.18    0.69
  -2   7 -11    4.61    2.72
  -2   7 -11    6.01    1.90
  -2   7 -11    5.39    2.44
  -2  -7  11   -0.39    0.96
   2   6 -11    2.03    1.37
   2   6 -11    2.23    1.74
   2  -6  11    0.61    0.78
   2   6 -11    2.68    2.03
  -2   6 -11    0.83    0.93
  -2   6 -11    0.11    0.90
  -2  -6  11    1.89    0.88
  -2   6 -11    1.34    1.41
  -2  -6  11    3.54    1.38
  -2   6 -11   -0.49    1.32
   2   5 -11   12.51    2.26
   2  -5  11    9.45    1.66
   2   5 -11   10.51    2.95
   2   5 -11   12.18    3.10
   2   5 -11   11.18    2.30
  -2   5 -11    9.48    3.10
  -2   5 -11   10.79    2.10
  -2  -5  11   13.20    2.27
  -2  -5  11   12.39    1.56
  -2   5 -11    8.80    1.95
  -2   5 -11    9.68    2.69
   2   4 -11    1.57    1.41
   2   4 -11    1.16    1.27
   2   4 -11    1.60    0.96
   2   4 -11    2.15    1.01
   2  -4  11    2.35    0.83
   2  -4  11    1.42    0.87
   2  -4  11    1.80    0.91
  -2   4 -11    1.98    1.32
  -2  -4  11    0.35    0.75
  -2   4 -11    1.15    0.80
  -2   4 -11    1.90    0.94
  -2   4 -11    1.15    1.40
  -2  -4  11    2.14    1.08
   2  -3  11    5.42    1.17
   2  -3  11    8.84    1.56
   2  -3  11    6.37    1.14
  -2   3 -11    7.44    2.03
  -2   3 -11    6.01    1.39
  -2   3 -11    6.32    2.33
  -2   3 -11    6.64    1.49
   2   1 -11   12.96    2.55
   2   1 -11   12.71    1.95
   2  -1  11    9.46    1.13
   2   1 -11   12.79    1.63
   2   1 -11   13.98    1.76
  -2   1 -11   12.15    1.79
  -2   1 -11   11.15    1.63
  -2  -1  11   13.16    1.49
  -2   1 -11   12.38    2.60
  -2  -1  11   11.66    1.65
   2   0  11    0.03    0.20
   2   0  11   -0.06    0.24
   2   0 -11   -0.21    0.65
   2   0 -11    0.00    0.38
   2   0 -11   -0.39    0.39
   2   0  11    0.05    0.24
   2   0 -11   -0.06    0.48
  -2   0 -11   -0.04    0.40
  -2   0  11   -0.02    0.26
  -2   0  11   -0.32    0.42
  -2   0 -11    0.19    0.80
  -2   0  11    0.14    0.24
  -2   0 -11    0.13    0.49
   2   1  11   11.78    0.87
   2  -1 -11   13.27    1.65
   2   1  11   10.69    0.90
   2  -1 -11   12.46    2.20
   2  -1 -11   13.15    1.56
  -2   1  11   12.25    1.43
  -2   1  11   11.88    0.91
  -2  -1 -11   13.24    2.49
  -2  -1 -11    9.74    1.47
  -2   1  11   12.98    1.11
  -2  -1 -11   11.20    1.32
   2  -2 -11   35.48    2.94
   2  -2 -11   39.97    3.38
   2  -2 -11   40.77    2.99
  -2   2  11   36.60    2.63
  -2   3  11    0.17    0.54
   2  -4 -11    1.20    0.91
  -2  -4 -11    1.21    0.52
  -2   4  11    1.88    0.62
  -2   4  11    2.23    0.48
   2   5  11    9.75    1.06
   2  -5 -11   10.89    2.18
   2  -5 -11   11.20    2.31
   2   5  11    9.40    1.24
  -2  -5 -11    9.04    1.32
  -2   5  11   11.60    1.44
   2  -6 -11    2.51    1.47
  -2   6  11    3.05    0.99
   2  -7 -11    0.85    1.44
   2   7  11    3.99    1.00
  -2  -7 -11    3.61    1.47
  -2   7  11    0.04    0.57
   2  -8 -11    3.70    2.17
  -2  -8 -11    1.07    1.21
   3   8 -11   16.52    4.43
  -3  -8  11   15.77    2.44
  -3  -8  11   14.10    2.97
   3  -7  11    2.57    1.14
   3   7 -11    0.66    1.21
   3   7 -11    0.61    1.62
   3   7 -11    1.43    1.65
  -3   7 -11    5.55    2.99
  -3   7 -11    3.00    2.17
  -3   7 -11    2.53    1.38
  -3  -7  11    2.06    1.45
  -3   7 -11    5.16    1.86
  -3  -7  11    0.72    0.77
   3   6 -11    5.08    2.39
   3   6 -11    4.63    1.65
   3   6 -11    5.47    2.49
  -3  -6  11    3.88    1.20
  -3   6 -11    0.03    1.49
  -3  -6  11    3.94    1.54
   3   5 -11   52.53    5.95
   3   5 -11   48.03    4.26
   3   5 -11   52.22    5.60
   3  -5  11   49.39    3.65
   3   5 -11   50.54    4.30
  -3  -5  11   52.72    4.09
  -3   5 -11   48.82    4.31
  -3   5 -11   43.99    5.92
  -3   5 -11   49.58    5.34
  -3  -5  11   51.05    3.48
  -3   5 -11   42.85    3.81
   3   4 -11    1.13    1.51
   3   4 -11    1.57    1.34
   3  -4  11    0.75    0.64
   3  -4  11    0.68    0.75
   3   4 -11    1.23    0.84
   3   4 -11    1.34    0.97
  -3  -4  11    0.83    0.79
  -3   4 -11    0.30    0.69
  -3   4 -11   -0.56    0.79
  -3   4 -11    0.82    0.77
  -3   4 -11    0.50    1.28
  -3  -4  11    0.68    0.89
   3   3 -11    5.09    1.50
   3   3 -11    5.57    1.27
   3   3 -11    3.77    1.89
   3   3 -11    4.97    1.83
  -3  -3  11    6.40    1.52
  -3  -3  11    5.00    1.44
   3   2 -11   11.26    1.55
   3   2 -11   11.49    2.79
   3   2 -11   10.78    1.94
   3   2 -11    9.95    2.16
  -3  -2  11   10.38    1.73
  -3  -2  11   10.50    1.85
   3   0  11    0.01    0.21
   3   0  11   -0.15    0.29
   3   0 -11    0.04    0.48
   3   0 -11   -0.20    0.79
   3   0 -11   -0.16    0.33
  -3   0 -11   -0.10    0.82
  -3   0  11   -0.42    0.46
  -3   0 -11   -0.01    0.44
  -3   0 -11    0.20    0.45
  -3   0  11    0.15    0.39
  -3   0  11    0.06    0.25
   3  -2 -11    7.68    1.95
   3  -2 -11   11.36    1.90
   3  -2 -11   10.24    1.41
  -3   2  11    9.77    1.57
  -3   2  11    9.26    1.13
  -3   2  11   10.32    0.90
   3  -3 -11    5.07    1.63
   3  -3 -11    4.31    1.26
   3  -3 -11    6.29    1.31
  -3   3  11    4.98    0.64
  -3   3  11    6.02    1.07
  -3   3  11    6.26    1.42
   3  -4 -11    0.60    0.93
   3  -4 -11    0.08    0.77
   3   4  11    0.79    0.51
   3   4  11    0.56    0.33
  -3   4  11    0.64    0.37
  -3   4  11    1.34    0.67
  -3   4  11    1.45    0.85
  -3  -4 -11    0.50    0.51
   3   5  11   46.04    3.07
   3  -5 -11   49.85    4.68
  -3   5  11   55.79    3.81
  -3  -5 -11   46.09    3.49
   3  -6 -11    5.73    2.23
   3  -6 -11    4.29    1.85
  -3   6  11    4.50    1.25
   3  -7 -11    2.21    1.92
   3   7  11    2.84    0.87
   3  -7 -11    1.39    1.72
  -3  -7 -11    2.84    1.26
  -3   7  11    2.35    1.06
   3  -8 -11   19.08    4.47
   3  -8 -11   17.10    4.11
   4   8 -11   -0.93    1.85
  -4  -8  11   -0.06    0.76
  -4  -8  11    0.55    1.34
   4   7 -11    0.16    1.17
   4  -7  11    2.49    1.31
   4   7 -11    0.01    1.38
   4   7 -11   -0.85    1.36
  -4   7 -11    1.87    1.87
  -4  -7  11   -0.39    0.57
  -4   7 -11    2.79    2.38
  -4   7 -11    4.01    1.53
  -4  -7  11    0.21    1.05
   4   6 -11    0.73    1.18
   4   6 -11    0.80    1.62
   4  -6  11   10.23    1.90
  -4   6 -11   12.79    3.33
  -4   6 -11   12.56    2.43
  -4   6 -11   10.57    3.67
   4  -5  11    7.93    1.64
   4   5 -11   10.67    3.40
   4   5 -11    9.13    2.16
   4   5 -11   10.06    2.97
   4   5 -11    9.22    1.94
  -4   5 -11    6.07    1.69
  -4  -5  11   10.56    2.18
  -4   5 -11    7.14    2.43
  -4   5 -11    8.78    3.22
  -4  -5  11    8.27    1.45
   4   4 -11    4.50    2.35
   4   4 -11    5.82    2.11
   4   4 -11    4.24    1.57
   4  -4  11    6.16    1.38
   4   4 -11    6.41    1.51
   4  -4  11    7.53    1.71
  -4   4 -11    6.74    2.70
  -4  -4  11    5.63    1.73
  -4   4 -11    6.74    1.60
  -4  -4  11    7.70    1.79
  -4   4 -11    5.09    2.01
   4   3 -11   11.28    1.61
   4   3 -11   10.34    3.01
   4   3 -11   11.53    2.21
   4   3 -11   12.72    2.74
  -4  -3  11   11.70    2.19
  -4  -3  11   15.88    2.39
   4   2 -11    5.03    1.49
   4  -2  11    1.98    0.78
   4   2 -11    4.96    1.65
   4   2 -11    4.94    1.17
   4   2 -11    3.42    1.81
  -4   2 -11    3.55    1.38
  -4   2 -11    3.19    1.73
  -4  -2  11    3.04    1.08
  -4   2 -11    3.61    1.10
  -4  -2  11    4.71    1.37
   4   0  11    0.02    0.25
   4   0 -11   -0.10    0.38
   4   0 -11   -0.28    0.94
   4   0 -11    0.05    0.63
  -4   0 -11    0.23    0.52
  -4   0 -11    0.14    0.55
  -4   0 -11    0.09    1.08
  -4   0  11   -0.48    0.51
  -4   0  11   -0.09    0.42
   4   2  11    3.28    0.83
   4  -2 -11    3.75    1.72
   4  -2 -11    5.31    1.15
   4   2  11    2.64    0.58
   4  -2 -11    5.07    1.39
  -4  -2 -11    4.40    1.02
  -4   2  11    4.62    1.27
  -4  -2 -11    3.09    1.03
  -4   2  11    4.15    1.08
  -4  -2 -11    1.86    1.44
   4  -3 -11   10.12    2.62
   4  -3 -11   12.37    2.16
   4  -3 -11   13.10    1.62
  -4   3  11   13.54    2.17
  -4   3  11   12.23    1.62
   4  -4 -11    6.02    2.08
   4   4  11    5.98    0.84
   4  -4 -11    5.48    1.61
  -4   4  11    6.24    1.52
  -4  -4 -11    6.29    1.22
  -4   4  11    5.63    1.37
   4  -5 -11    9.10    2.58
   4   5  11    8.07    1.08
  -4   5  11    9.45    1.84
  -4  -5 -11    7.67    1.49
  -4  -6 -11   10.97    2.03
   4  -7 -11    0.58    1.40
   4   7  11    2.20    0.82
  -4   7  11    0.67    0.76
  -4  -7 -11    3.45    1.44
   4  -8 -11   -0.04    1.49
  -4  -8 -11    0.95    1.16
   5   7 -11    0.15    0.89
   5   7 -11   -0.12    1.54
   5   7 -11    0.52    1.93
   5   7 -11   -0.06    1.16
  -5  -7  11    0.55    0.79
  -5   7 -11    1.19    1.12
  -5  -7  11    1.06    1.15
  -5   7 -11   -0.91    1.19
   5   6 -11   10.64    2.20
   5   6 -11   10.27    2.61
   5   6 -11   11.27    3.42
   5  -6  11    5.35    1.66
   5   6 -11    9.37    3.51
  -5  -6  11   12.71    2.61
  -5  -6  11   12.37    1.93
  -5   6 -11    4.86    3.02
   5   5 -11   14.64    2.14
   5   5 -11   12.01    3.21
   5   5 -11   11.28    2.52
   5  -5  11   11.17    1.93
   5   5 -11   12.60    4.01
  -5   5 -11   15.89    4.41
  -5   5 -11   12.48    3.02
  -5   5 -11   10.68    2.11
  -5  -5  11   13.20    2.50
  -5  -5  11    9.97    1.72
   5   4 -11    3.93    2.20
  -5   4 -11   15.75    3.10
  -5   4 -11   18.13    4.41
   5  -3  11    8.18    1.64
   5  -3  11    7.93    1.48
   5   3 -11    5.75    1.34
   5   3 -11    7.57    2.76
   5   3 -11    5.37    1.66
  -5  -3  11    5.10    1.68
  -5   3 -11    6.43    2.84
  -5   3 -11    5.53    1.87
  -5   3 -11    7.62    1.64
  -5  -3  11    7.29    1.75
   5   2 -11   10.29    1.51
   5  -2  11   14.27    1.68
   5   2 -11    8.73    2.95
   5   2 -11    8.44    1.94
  -5   2 -11   15.88    1.98
  -5   2 -11   16.37    2.93
  -5  -2  11    8.41    1.97
  -5   2 -11   15.60    3.74
  -5  -2  11   10.72    2.00
   5   1 -11   11.93    2.21
   5   1 -11    9.76    1.41
   5   1 -11   10.43    2.97
  -5  -1  11   10.31    1.90
  -5  -1  11    9.28    1.94
   5   0  11   -0.23    0.26
   5   0 -11   -0.28    0.57
   5   0 -11   -0.28    0.96
   5   0 -11    0.02    0.41
  -5   0 -11    0.23    0.57
  -5   0 -11   -0.10    1.17
  -5   0  11   -0.32    0.64
  -5   0  11   -0.55    0.45
  -5   0 -11   -0.06    0.43
   5  -1 -11    8.58    1.92
   5  -1 -11   10.69    1.34
   5  -1 -11    9.54    2.68
  -5   1  11    8.24    1.70
  -5   1  11   10.02    1.84
   5  -2 -11   11.17    1.46
   5  -2 -11    6.78    2.49
   5  -2 -11    8.47    1.93
   5   2  11   15.29    1.38
  -5   2  11    8.73    1.82
  -5  -2 -11   13.89    1.75
  -5  -2 -11   13.96    3.44
  -5   2  11    8.74    1.74
  -5  -2 -11   16.46    1.88
   5  -3 -11    4.34    2.00
   5  -3 -11    5.85    1.69
   5   3  11    7.66    0.95
  -5  -3 -11    8.07    1.47
  -5  -3 -11    5.26    1.30
  -5   3  11    5.28    1.38
  -5   3  11    6.46    1.65
   5  -4 -11    3.04    1.40
   5  -4 -11    2.25    1.75
  -5   4  11    2.02    1.02
  -5   4  11    2.77    1.24
   5  -5 -11   11.70    3.21
   5   5  11   13.69    1.54
  -5   5  11   11.84    2.25
  -5  -5 -11   13.62    1.91
   5  -6 -11    9.75    3.02
   5   6  11    4.95    1.14
  -5   6  11   10.94    2.16
  -5  -6 -11    2.90    1.27
   5  -7 -11    1.08    1.69
  -5   7  11   -0.32    0.70
  -5  -7 -11    0.23    0.94
   6   7 -11    1.31    2.35
  -6   7 -11    0.44    1.05
  -6  -7  11   -0.11    0.69
  -6   7 -11    0.72    1.72
  -6  -7  11   -0.18    1.06
   6   6 -11    2.49    1.66
   6   6 -11    2.49    2.19
   6   6 -11    1.55    2.20
   6   6 -11    2.06    1.18
  -6   6 -11    2.64    1.32
  -6  -6  11    2.01    0.92
  -6  -6  11    2.12    1.50
  -6   6 -11    2.06    1.99
  -6   6 -11    1.67    2.38
   6   5 -11    5.49    1.45
   6   5 -11    6.86    2.14
   6   5 -11    5.34    2.95
  -6   5 -11    1.04    2.12
  -6   5 -11    4.11    1.42
  -6   5 -11    2.65    1.79
  -6  -5  11    7.70    2.13
   6   4 -11    0.53    1.78
   6   4 -11    0.55    0.68
   6   4 -11    0.84    1.17
   6  -4  11    2.54    1.08
  -6  -4  11    0.52    1.03
  -6   4 -11    1.49    2.00
  -6   4 -11    3.07    1.87
  -6   4 -11    2.47    1.10
   6  -2  11   17.78    2.14
   6  -2  11   18.23    2.07
  -6   2 -11   21.05    2.30
  -6   2 -11   17.83    2.77
  -6   2 -11   12.68    3.64
   6   1 -11   10.60    2.15
   6   1 -11   12.97    3.52
   6  -1  11    8.44    1.51
  -6  -1  11   13.90    2.53
  -6  -1  11   14.16    2.43
  -6   1 -11    7.91    3.05
  -6   1 -11    8.06    1.61
  -6   1 -11    9.56    2.11
   6   0 -11   -0.10    0.41
   6   0 -11    0.08    0.85
   6   0  11    0.04    0.36
   6   0 -11    0.72    1.41
  -6   0 -11    0.08    0.45
  -6   0  11   -0.21    0.64
  -6   0  11   -0.77    0.58
  -6   0 -11    0.06    1.33
  -6   0 -11   -0.50    0.57
   6  -1 -11   12.61    3.29
   6  -1 -11   13.37    2.43
   6   1  11    7.88    1.21
  -6  -1 -11    8.07    1.50
  -6   1  11   12.39    2.27
  -6   1  11   13.31    2.18
  -6  -1 -11    8.94    1.81
  -6  -1 -11    9.64    3.08
  -6  -2 -11   18.02    4.25
   6  -3 -11   27.25    3.36
   6  -3 -11   34.47    4.81
  -6   3  11   30.29    3.18
  -6   3  11   31.24    3.21
   6   4  11    3.46    0.84
   6  -4 -11    1.21    1.16
   6  -4 -11    0.90    1.69
  -6  -4 -11    1.52    0.88
  -6   4  11    0.31    0.86
  -6   4  11    0.91    0.93
   6  -5 -11   10.10    3.10
  -6   5  11    6.49    1.80
  -6   5  11    7.70    2.02
   6   6  11    3.75    1.05
   6  -6 -11    2.36    2.20
  -6  -6 -11    3.61    1.38
  -6   6  11    2.29    1.29
   6  -7 -11   -0.65    1.58
  -6  -7 -11    0.13    1.06
  -6   7  11    0.02    0.99
   7   7 -11    0.31    2.29
  -7  -7  11    1.63    1.48
  -7  -7  11    1.64    1.07
   7   6 -11    1.35    1.95
   7   6 -11    2.13    2.29
   7   6 -11   -0.38    1.19
  -7  -6  11    1.40    0.85
  -7  -6  11    2.81    1.64
  -7   6 -11    5.29    2.41
   7   5 -11    0.78    2.04
   7   5 -11    1.05    1.37
  -7   5 -11   -0.18    1.95
  -7  -5  11    1.04    1.17
  -7   5 -11   -0.53    1.00
   7   4 -11    0.76    1.71
  -7   4 -11   10.24    3.75
  -7   4 -11   10.77    2.85
  -7   4 -11    8.39    1.81
   7   3 -11   -0.09    1.00
   7   3 -11    0.38    1.63
  -7   3 -11    0.20    1.04
  -7  -3  11    0.05    0.94
  -7   3 -11    0.42    0.72
  -7   3 -11   -0.44    1.56
   7   2 -11    8.71    2.29
   7   2 -11   15.28    4.29
   7  -2  11   17.43    2.09
  -7  -2  11    9.89    2.28
  -7   2 -11   21.07    5.06
  -7   2 -11   14.67    2.94
  -7   2 -11   18.54    2.11
  -7  -2  11   10.41    2.48
   7  -1  11    6.54    1.41
  -7   1 -11    5.58    1.31
  -7   1 -11    6.93    2.01
  -7   1 -11    3.99    2.47
   7   0 -11   -0.58    1.21
   7   0 -11    0.65    1.02
   7   0  11    0.04    0.45
  -7   0 -11   -0.15    0.74
  -7   0 -11   -0.14    0.44
  -7   0  11    0.16    0.84
  -7   0 -11    0.21    1.46
  -7   0  11    0.17    0.80
   7  -1 -11    1.24    1.14
   7  -1 -11   -0.32    1.45
  -7   1  11   -0.23    0.76
  -7   1  11   -0.20    0.77
  -7  -1 -11    5.78    1.65
  -7  -1 -11    7.45    3.09
   7  -2 -11    9.31    2.33
   7   2  11   15.85    1.71
   7  -2 -11    7.04    2.92
  -7   2  11    9.97    2.22
  -7  -2 -11   18.78    4.58
  -7  -2 -11   15.94    2.25
  -7  -2 -11   16.37    1.95
  -7   2  11    9.98    2.25
   7   3  11   -0.16    0.40
   7  -3 -11    0.41    1.50
   7  -3 -11   -0.09    0.89
  -7   3  11    0.81    1.02
  -7   3  11    0.79    1.00
  -7  -3 -11    0.33    0.78
   7  -4 -11   -1.24    1.39
   7  -4 -11   -0.25    1.02
  -7   4  11   -0.29    1.06
  -7  -4 -11    7.15    1.69
  -7   4  11    0.24    0.84
   7   5  11    0.11    0.49
   7  -5 -11    1.34    1.81
  -7  -5 -11   -0.14    0.74
  -7   5  11    0.52    1.01
  -7   5  11    0.69    1.17
   7  -6 -11    2.99    2.35
  -7   6  11    0.84    1.19
  -7   6  11    0.57    1.05
  -7  -6 -11    3.81    1.49
   7  -7 -11    2.23    2.51
   8   6 -11    2.24    2.89
  -8  -6  11    0.86    0.85
  -8  -6  11    1.45    1.49
   8   5 -11    1.16    1.40
   8   5 -11    2.04    2.60
  -8   5 -11    1.22    1.56
  -8  -5  11    4.11    1.79
   8   4 -11    0.30    1.91
   8   4 -11    1.99    1.46
  -8  -4  11   -0.05    0.96
  -8   4 -11    5.71    2.23
  -8   4 -11    8.25    3.82
   8   3 -11    0.75    2.16
   8   3 -11   -0.71    0.93
  -8   3 -11    1.07    1.39
  -8   3 -11    0.87    2.18
  -8  -3  11    2.21    1.42
   8   2 -11   36.78    4.05
   8   2 -11   39.02    6.13
  -8  -2  11   46.95    4.29
   8   1 -11    0.08    1.08
   8   1 -11    0.91    2.05
   8  -1  11    3.51    1.15
  -8   1 -11    2.74    1.48
  -8   1 -11    2.17    2.24
  -8  -1  11    0.41    1.07
  -8  -1  11   -0.30    0.95
   8   0 -11   -0.82    1.38
   8   0  11    0.15    0.53
   8   0 -11   -0.27    0.98
  -8   0  11    0.57    0.95
  -8   0 -11    0.87    1.01
  -8   0 -11    0.50    1.84
  -8   0  11   -0.46    0.86
   8  -1 -11   -1.02    1.41
   8   1  11    2.47    0.93
   8  -1 -11   -0.21    0.99
  -8   1  11   -0.49    0.74
  -8  -1 -11    3.10    1.38
  -8   1  11   -0.17    0.76
  -8  -1 -11    3.02    2.29
   8  -2 -11   41.69    4.35
   8  -2 -11   50.61    6.62
  -8   2  11   45.52    4.55
  -8   2  11   46.17    4.16
   8  -3 -11    1.48    1.95
   8  -3 -11    1.46    1.26
   8   3  11    1.15    0.74
  -8   3  11    0.27    1.01
  -8  -3 -11    0.45    0.92
  -8   3  11    1.19    1.12
   8  -4 -11    0.21    1.79
   8  -4 -11   -0.16    1.07
  -8   4  11   -0.33    0.93
  -8  -4 -11    7.55    1.79
  -8   4  11    0.60    1.15
   8  -5 -11    2.97    2.62
  -8   5  11    2.71    1.57
  -8   5  11    1.93    1.41
  -8  -5 -11    0.77    1.03
   8  -6 -11    1.13    2.41
  -8   6  11    0.83    1.40
  -8   6  11   -0.23    1.05
   9   5 -11    0.21    2.26
  -9  -5  11   -0.42    1.25
   9   4 -11    2.13    1.76
   9   4 -11    1.41    2.31
  -9   4 -11    4.43    2.23
  -9  -4  11    4.10    1.87
   9   3 -11   -0.34    1.10
   9   3 -11   -0.73    1.72
  -9   3 -11   -0.23    1.12
  -9   3 -11    0.57    2.27
  -9  -3  11    0.77    1.14
   9   2 -11    8.69    3.79
   9   2 -11    6.90    2.26
  -9  -2  11    9.36    2.49
  -9   2 -11   13.56    3.06
  -9   2 -11   12.32    4.32
   9   1 -11    8.86    3.90
   9   1 -11    7.56    2.27
  -9   1 -11    6.68    3.38
  -9   1 -11    7.33    2.20
  -9  -1  11    5.59    1.90
   9   0 -11   -0.81    0.95
   9   0 -11    1.22    2.08
   9   0  11   -0.04    0.61
  -9   0 -11   -0.31    0.93
  -9   0  11    0.05    1.06
  -9   0 -11   -0.93    1.70
   9  -1 -11    5.06    2.98
   9   1  11    7.38    1.51
   9  -1 -11    5.68    2.11
  -9   1  11    8.55    2.33
  -9  -1 -11    6.52    2.04
  -9  -1 -11    6.46    3.44
  -9   1  11    6.68    2.06
   9  -2 -11    8.29    3.58
   9   2  11   14.27    1.89
   9  -2 -11    5.51    2.03
  -9  -2 -11   11.16    2.49
  -9   2  11    7.56    2.14
  -9   2  11    8.70    2.40
   9   3  11    0.61    0.68
   9  -3 -11    0.56    1.28
   9  -3 -11   -0.95    1.65
  -9   3  11   -0.45    1.00
  -9   3  11   -0.16    0.89
  -9  -3 -11   -0.37    0.77
   9  -4 -11    3.61    1.87
   9  -4 -11    2.21    2.39
  -9  -4 -11    4.72    1.65
  -9   4  11    3.88    1.78
  -9   4  11    2.80    1.54
   9  -5 -11    0.72    2.45
  -9   5  11    0.72    1.22
  -9   5  11    1.23    1.66
  10   4 -11    5.29    3.56
 -10  -4  11    4.59    1.95
  10   3 -11   -0.76    2.22
  10   3 -11   -0.74    1.28
 -10  -3  11    0.39    1.26
 -10   3 -11    0.00    1.32
  10   2 -11    2.16    2.81
  10   2 -11    1.93    1.72
 -10  -2  11    3.11    1.67
 -10   2 -11    6.43    2.36
  10   1 -11    6.65    3.56
  10   1 -11    7.65    2.37
 -10   1 -11    0.93    2.59
 -10   1 -11    2.69    1.75
 -10  -1  11   12.69    2.87
  10   0 -11    0.42    1.38
  10   0 -11   -0.07    2.05
 -10   0 -11    0.59    1.20
 -10   0 -11    0.79    2.40
 -10   0  11   -0.26    1.09
  10  -1 -11    6.05    3.16
  10  -1 -11   11.50    2.82
 -10  -1 -11   -0.55    2.13
 -10  -1 -11    2.47    1.58
 -10   1  11   11.44    2.58
  10   2  11    5.68    1.51
  10  -2 -11    4.06    1.94
  10  -2 -11    4.79    3.00
 -10  -2 -11    5.84    2.00
 -10   2  11    3.25    1.64
  10  -3 -11    0.44    2.05
  10  -3 -11    0.43    1.32
 -10  -3 -11    0.14    1.02
 -10   3  11   -0.17    1.11
  10  -4 -11    4.84    3.49
 -10   4  11    3.52    1.83
  11   3 -11    2.38    2.97
 -11  -3  11    2.15    1.61
  11   2 -11   -0.96    2.29
 -11  -2  11    0.56    1.39
  11   1 -11    3.29    3.23
 -11  -1  11    2.94    1.72
  11   0 -11    1.82    1.78
  11   0 -11    1.05    2.45
 -11   0  11    0.25    1.24
  11  -1 -11   -0.47    2.45
 -11   1  11    1.81    1.47
  11  -2 -11   -0.31    2.63
 -11   2  11   -0.75    1.20
  11  -3 -11    2.19    3.14
 -11   3  11    1.61    1.60
  12   0 -11    0.57    2.97
   0   8 -12    2.29    1.96
   0  -8  12    2.05    1.20
   0  -7  12    3.92    1.69
   0   7 -12    6.48    2.19
   0   7 -12    3.96    2.51
   0  -7  12    2.58    1.11
   0   7 -12    4.94    2.51
   0   7 -12    2.84    1.39
   0   6 -12    6.24    1.77
   0   6 -12    6.74    2.77
   0  -6  12    5.51    1.38
   0   6 -12    6.63    2.55
   0   6 -12    6.80    1.98
   0  -6  12    6.13    1.81
   0   5 -12    3.27    1.33
   0   5 -12    2.16    1.68
   0   5 -12    1.85    1.13
   0  -5  12    1.29    0.96
   0  -5  12    4.00    1.14
   0   5 -12    2.76    1.93
   0  -4  12   18.07    2.41
   0   4 -12   16.65    3.42
   0   4 -12   20.27    2.41
   0   4 -12   18.69    2.28
   0  -4  12   20.19    2.22
   0  -4  12   16.49    1.75
   0   4 -12   16.78    3.67
   0  -3  12    2.85    0.99
   0  -3  12    2.90    1.07
   0  -3  12    3.07    0.80
   0   3 -12    3.38    1.14
   0   3 -12    4.09    1.79
   0   3 -12    3.43    1.14
   0   3 -12    2.66    1.53
   0   2 -12   20.82    2.09
   0  -2  12   19.86    2.02
   0   2 -12   20.57    2.26
   0  -2  12   22.56    1.93
   0   2 -12   17.97    2.85
   0   2 -12   18.91    2.70
   0  -1  12   14.61    1.50
   0   1 -12   14.96    1.68
   0   1 -12   14.88    2.33
   0   1 -12   14.79    2.23
   0   1 -12   15.49    1.91
   0   0  12    7.22    0.80
   0   0 -12    9.86    1.99
   0   0 -12    7.38    1.26
   0   0 -12    7.93    1.64
   0   0  12    7.22    0.83
   0   0 -12    6.41    1.38
   0  -1 -12   13.89    1.61
   0  -1 -12   15.28    1.83
   0  -2 -12   20.81    2.17
   0  -3 -12    2.79    0.96
   0  -4 -12   17.36    2.08
   0   5  12    1.71    0.53
   0   5  12    1.73    0.53
   0  -6 -12    6.56    1.72
   0   6  12    5.23    1.05
   0  -7 -12    5.05    1.84
   0   7  12    4.36    1.10
   0  -8 -12    3.54    2.13
   1   8 -12   -0.22    1.50
   1  -8  12   -0.32    0.79
  -1  -8  12   -0.52    1.11
  -1  -8  12    0.89    0.97
  -1   8 -12    0.14    1.56
   1   7 -12   23.79    4.99
   1   7 -12   20.06    3.51
   1   7 -12   22.68    3.19
   1   7 -12   20.53    4.92
  -1  -7  12   22.57    2.53
  -1  -7  12   24.02    3.53
   1  -6  12    5.25    1.39
   1   6 -12    4.23    1.58
   1   6 -12    7.06    2.84
   1   6 -12    5.34    2.50
   1   6 -12    6.90    2.04
   1  -6  12    4.68    1.60
  -1   6 -12    4.80    1.77
  -1  -6  12    4.82    1.59
  -1   6 -12    3.13    2.04
  -1   6 -12    4.27    1.63
  -1  -6  12    5.24    1.26
  -1   6 -12    3.41    2.18
   1   5 -12    0.15    1.27
   1   5 -12    0.35    0.84
   1  -5  12    2.97    1.03
   1   5 -12    0.19    1.31
   1  -5  12    2.70    1.17
  -1   5 -12    3.99    1.53
  -1   5 -12    2.54    1.66
  -1   5 -12    2.64    1.90
  -1  -5  12    0.79    1.00
  -1   5 -12    3.40    1.43
  -1  -5  12    0.71    0.68
   1   2 -12    4.65    1.23
   1   2 -12    4.12    1.59
   1   2 -12    4.47    1.24
   1   2 -12    4.51    1.62
   1  -2  12    4.20    1.05
  -1  -2  12    4.85    1.10
  -1   2 -12    3.40    1.11
  -1   2 -12    4.49    1.51
  -1   2 -12    3.28    1.00
  -1  -2  12    5.12    1.17
  -1   2 -12    3.66    1.62
   1   1 -12    0.87    0.92
   1   1 -12    0.81    0.88
   1   1 -12    0.48    0.54
   1   1 -12    1.19    0.68
   1  -1  12    0.22    0.33
  -1   1 -12    1.06    0.81
  -1   1 -12    0.79    1.00
  -1  -1  12    0.88    0.51
  -1  -1  12    0.91    0.62
  -1   1 -12    0.34    0.60
   1   0 -12   11.90    1.49
   1   0 -12   10.32    1.52
   1   0 -12   13.53    1.99
   1   0  12   10.09    1.04
   1   0  12   10.25    1.00
  -1   0 -12   10.45    1.56
  -1   0 -12   10.26    1.56
  -1   0  12   12.30    1.16
  -1   0  12   13.27    1.37
  -1   0 -12   11.42    2.36
  -1   0  12   12.28    1.07
   1   1  12    0.42    0.19
   1  -1 -12    1.31    0.73
   1   1  12    0.59    0.22
   1  -1 -12    1.63    0.76
   1  -1 -12    0.52    0.56
  -1  -1 -12    0.67    0.51
  -1   1  12    0.88    0.29
  -1  -1 -12   -0.02    0.46
  -1   1  12    0.73    0.24
   1  -2 -12    3.87    1.05
   1  -2 -12    4.94    1.08
  -1  -2 -12    3.59    1.03
   1  -5 -12    0.39    0.77
   1  -5 -12    0.16    0.84
  -1   5  12    0.60    0.46
  -1   5  12    0.49    0.39
   1   6  12    4.69    0.95
   1  -6 -12    6.25    1.83
  -1   6  12    4.69    1.06
   1  -7 -12   21.46    3.74
  -1   7  12   22.33    2.23
   1  -8 -12    0.33    1.69
   2   8 -12    6.28    3.04
  -2  -8  12    7.70    1.84
  -2  -8  12    7.34    2.33
  -2   8 -12    1.62    2.14
  -2   7 -12   24.92    5.57
   2   6 -12    2.86    1.47
   2   6 -12    3.41    1.42
   2   6 -12    3.76    2.31
   2  -6  12    1.05    0.86
   2   6 -12    3.00    2.11
  -2   6 -12    2.04    1.25
  -2  -6  12    4.65    1.62
  -2   6 -12    0.83    1.10
  -2   6 -12   -0.06    1.54
  -2  -6  12    3.51    1.11
  -2   6 -12    1.52    1.72
   2   5 -12    2.73    1.85
   2   5 -12    1.73    1.07
   2   5 -12    2.01    1.66
   2   5 -12    1.01    1.16
  -2  -5  12    3.49    1.03
  -2  -5  12    3.04    1.29
  -2   5 -12    8.23    2.95
  -2   5 -12   10.45    2.93
  -2   5 -12    8.41    1.91
   2   4 -12   16.16    3.57
   2   4 -12   15.79    2.53
   2   4 -12   15.30    3.33
  -2  -4  12   14.63    2.32
  -2  -4  12   14.48    2.56
   2   2 -12    0.51    0.59
   2   2 -12    1.15    0.83
   2   2 -12    1.29    1.16
   2   2 -12    1.54    1.11
   2  -2  12    1.19    0.65
  -2   2 -12    0.97    1.12
  -2  -2  12   -0.13    0.58
  -2   2 -12    1.68    1.02
  -2   2 -12    0.88    0.73
  -2  -2  12    1.18    0.69
   2   1 -12    9.43    2.06
   2   1 -12   10.43    1.54
   2   1 -12    9.19    1.69
   2   1 -12    8.63    2.19
  -2  -1  12   10.53    1.61
  -2  -1  12    8.94    1.35
   2   0 -12   14.08    1.73
   2   0 -12   14.99    1.78
   2   0 -12   11.62    2.39
  -2   0  12   13.36    1.43
  -2   0  12   13.94    1.24
  -2   0  12   12.99    1.59
   2  -1 -12   11.73    1.86
   2  -1 -12    9.41    1.64
   2  -1 -12   10.01    2.04
  -2   1  12    9.71    1.51
  -2   1  12    8.70    0.81
  -2   1  12    9.18    1.03
   2  -2 -12    0.72    0.60
   2  -2 -12    0.54    0.72
   2  -2 -12    0.67    0.66
  -2   2  12    0.47    0.21
  -2   2  12    0.59    0.31
  -2  -2 -12    1.11    0.67
  -2  -2 -12    1.79    0.52
   2  -4 -12   13.94    2.13
  -2   4  12   14.58    1.40
  -2   4  12   15.89    1.19
   2   5  12    8.08    1.15
   2   5  12    9.35    0.98
   2   6  12    0.34    0.44
   2  -6 -12    3.06    1.45
  -2   6  12    3.81    1.06
  -2  -6 -12    1.23    0.97
   2  -8 -12    7.48    2.81
   2  -8 -12    7.38    2.81
   3   8 -12    6.56    3.06
  -3  -8  12   10.43    2.71
  -3  -8  12    8.90    1.93
  -3   7 -12   15.02    2.99
  -3   7 -12   16.08    2.99
  -3   7 -12   16.58    4.06
   3   6 -12    6.26    2.66
   3   6 -12    4.49    1.61
   3   6 -12    5.14    2.52
   3   6 -12    4.62    1.84
  -3   6 -12    1.60    1.69
  -3  -6  12    6.79    1.90
  -3  -6  12    5.31    1.37
   3   5 -12    5.03    2.50
   3   5 -12    4.53    1.47
   3   5 -12    4.35    1.73
   3   5 -12    3.39    2.03
  -3  -5  12    4.07    1.15
  -3  -5  12    3.06    1.36
   3  -4  12    9.11    1.59
   3   4 -12   10.02    3.04
   3   4 -12    9.13    1.82
   3   4 -12    8.15    2.59
   3   4 -12    8.01    1.96
   3  -4  12    9.69    1.86
  -3   4 -12    7.71    1.77
  -3  -4  12    7.97    1.79
  -3  -4  12    8.43    2.10
  -3   4 -12    8.38    2.44
  -3   4 -12    8.02    2.80
   3   3 -12   21.88    2.61
   3   3 -12   23.07    3.35
   3   3 -12   25.70    2.58
   3   3 -12   27.02    3.96
  -3  -3  12   22.16    2.72
  -3  -3  12   24.50    2.55
  -3   2 -12   19.76    3.92
   3   1 -12    4.05    1.12
   3   1 -12    7.10    2.14
   3   1 -12    4.06    1.39
   3   1 -12    3.18    1.20
  -3  -1  12    4.74    1.24
  -3  -1  12    4.00    1.15
   3   0 -12    6.60    1.33
   3   0 -12    8.37    2.24
   3   0 -12    6.47    1.50
  -3   0  12    5.96    1.26
  -3   0  12    6.96    1.41
   3  -1 -12    5.65    1.78
   3  -1 -12    3.94    1.04
   3  -1 -12    5.14    1.34
  -3   1  12    3.59    1.07
  -3   1  12    3.80    0.67
  -3   1  12    5.66    1.08
   3  -3 -12   24.97    2.38
   3  -3 -12   21.98    2.84
   3  -3 -12   20.07    2.37
  -3   3  12   23.64    1.98
  -3   3  12   19.28    1.43
  -3   3  12   21.41    2.20
   3   4  12    9.30    0.90
   3  -4 -12    6.86    1.68
   3   4  12    8.84    1.17
   3  -4 -12    8.00    2.10
  -3  -4 -12    8.96    1.15
  -3   4  12    8.94    1.49
   3  -6 -12    4.60    1.99
  -3   6  12    6.77    1.51
  -3  -7 -12   15.46    2.81
   3  -8 -12    9.03    3.03
   4   7 -12   14.69    2.77
   4  -7  12    5.83    1.76
   4   7 -12   10.57    3.64
   4   7 -12   12.11    3.85
   4   7 -12    7.96    2.48
  -4  -7  12   11.62    2.60
  -4   7 -12    5.11    2.46
  -4   7 -12    4.69    1.83
  -4  -7  12   10.67    1.91
   4   6 -12    3.00    2.15
   4   6 -12    3.34    2.26
   4  -6  12    2.74    1.19
   4   6 -12    3.09    1.39
   4   6 -12    1.36    1.26
  -4   6 -12    3.35    2.63
  -4  -6  12    3.74    1.15
  -4   6 -12    2.13    1.97
  -4  -6  12    1.48    1.24
  -4   6 -12    2.42    1.20
   4  -5  12    0.32    0.70
   4   5 -12   -0.44    0.65
   4   5 -12   -0.76    1.22
   4   5 -12   -0.39    0.82
   4   5 -12   -0.30    1.03
  -4   5 -12    0.73    1.60
  -4   5 -12   -0.22    0.66
  -4  -5  12   -0.20    0.51
  -4   5 -12    1.03    1.54
  -4  -5  12    0.23    0.91
   4  -4  12   25.85    2.88
   4   4 -12   32.66    3.00
   4  -4  12   23.89    2.46
   4   4 -12   31.99    4.70
   4   4 -12   28.72    3.24
   4   4 -12   27.20    3.90
  -4  -4  12   27.26    3.33
  -4   4 -12   24.16    3.62
  -4   4 -12   24.96    5.09
  -4   4 -12   24.15    2.87
  -4  -4  12   28.50    3.01
   4   3 -12    9.95    2.97
   4   3 -12   11.59    1.70
   4   3 -12   10.78    2.63
   4   3 -12   10.22    2.19
  -4  -3  12   12.70    2.33
  -4  -3  12    8.95    1.92
   4   2 -12    3.19    1.41
   4   2 -12    3.52    1.06
   4   2 -12    2.88    1.25
   4   2 -12    2.05    1.64
  -4  -2  12    3.30    1.18
  -4   2 -12    0.35    0.61
  -4   2 -12    0.41    0.82
  -4  -2  12    1.55    0.86
  -4   2 -12   -0.08    1.08
   4   1 -12    5.54    1.57
   4   1 -12    6.24    1.33
   4   1 -12    3.97    1.93
  -4  -1  12    6.49    1.51
  -4  -1  12    5.72    1.38
   4   0 -12   30.50    3.98
   4  -1 -12    6.26    2.10
   4  -1 -12    4.28    1.07
   4  -1 -12    6.07    1.57
  -4   1  12    5.94    1.32
  -4   1  12    4.86    1.33
   4  -2 -12    2.38    0.86
   4  -2 -12    2.42    1.14
   4  -2 -12    1.53    1.26
  -4  -2 -12    0.27    0.55
  -4   2  12    1.51    0.77
  -4   2  12    2.62    1.05
   4  -3 -12   10.73    1.53
   4  -3 -12    9.21    1.95
   4  -3 -12    9.63    2.50
  -4   3  12   10.32    1.53
  -4   3  12   11.93    2.11
   4  -4 -12   28.48    3.07
   4   4  12   23.88    1.88
   4  -4 -12   29.14    3.86
  -4  -4 -12   22.36    2.17
  -4   4  12   28.59    2.64
  -4   4  12   30.66    2.92
   4  -5 -12   -0.50    1.09
   4   5  12    0.29    0.39
  -4  -5 -12    0.56    0.62
  -4   5  12   -0.39    0.52
   4  -6 -12    3.65    1.94
   4   6  12    3.42    0.90
  -4  -6 -12    3.38    1.21
  -4   6  12    3.38    1.23
   4  -7 -12    9.68    3.11
  -4  -7 -12    4.91    1.62
  -4   7  12   10.06    2.02
   5   7 -12    4.66    1.69
   5   7 -12    6.37    2.93
  -5  -7  12    5.54    1.53
  -5  -7  12    5.52    2.05
  -5   7 -12    0.35    1.77
   5   6 -12    3.64    1.50
   5   6 -12    3.78    2.31
   5  -6  12    3.15    1.25
   5   6 -12    4.62    2.70
   5   6 -12    3.21    1.69
  -5   6 -12    3.11    2.00
  -5  -6  12    4.03    1.62
  -5   6 -12    3.52    2.54
  -5  -6  12    3.87    1.20
  -5   6 -12    2.78    1.38
   5   5 -12   -0.59    0.96
   5   5 -12   -0.01    0.73
   5  -5  12    1.28    0.95
   5   5 -12    0.55    1.52
   5   5 -12    0.21    1.05
  -5   5 -12    0.24    0.82
  -5  -5  12    1.37    1.23
  -5   5 -12   -0.42    1.03
  -5   5 -12    0.74    1.78
  -5  -5  12   -0.12    0.61
  -5   4 -12   15.46    3.25
  -5   4 -12   13.47    4.11
   5   3 -12    9.99    1.78
   5   3 -12    9.96    2.24
   5   3 -12    8.88    2.97
   5   3 -12    9.25    2.49
  -5  -3  12   10.30    2.32
  -5  -3  12   11.53    2.27
   5   2 -12    0.55    1.35
   5  -2  12    8.85    1.57
   5   2 -12    0.69    0.92
   5   2 -12    0.79    0.99
  -5   2 -12    9.28    1.79
  -5   2 -12    7.99    2.18
  -5   2 -12    9.22    3.12
   5  -2 -12    1.15    0.65
   5  -2 -12    0.75    0.95
   5  -2 -12   -0.11    1.18
  -5   2  12    0.34    0.82
  -5  -2 -12    7.77    1.57
  -5  -2 -12    8.39    1.56
   5  -3 -12    8.87    2.64
   5  -3 -12   12.34    2.36
  -5   3  12   10.20    1.89
  -5   3  12    9.85    2.04
   5   5  12    0.15    0.40
   5  -5 -12    0.29    1.45
  -5   5  12    0.32    0.90
  -5   5  12   -0.01    0.72
  -5  -5 -12    1.09    0.83
   5   6  12    2.62    0.87
   5  -6 -12    2.46    2.13
  -5   6  12    2.70    1.22
  -5  -6 -12    3.11    1.24
   5  -7 -12    4.58    2.55
   6   7 -12    2.92    2.63
  -6  -7  12    4.37    1.40
  -6  -7  12    4.56    1.88
   6   6 -12    8.45    3.10
   6   6 -12    5.06    2.19
   6   6 -12   10.81    3.94
  -6  -6  12    8.31    2.37
  -6   6 -12    7.45    2.97
  -6  -6  12    9.85    1.80
  -6   6 -12    6.41    1.86
   6   5 -12    0.04    1.21
   6   5 -12    0.98    2.01
   6   5 -12    0.25    0.79
   6  -5  12    2.85    1.24
   6   5 -12    0.18    1.25
  -6   5 -12    0.74    2.14
  -6  -5  12    0.28    1.02
  -6   5 -12    1.73    1.21
  -6   5 -12    2.68    1.96
   6   4 -12   -0.08    1.10
   6   4 -12    0.08    0.64
   6  -4  12    2.56    1.12
   6   4 -12    0.01    1.00
   6   4 -12    1.85    2.09
  -6  -4  12   -0.65    0.85
  -6   4 -12    2.67    1.79
  -6   4 -12    0.55    1.77
  -6   4 -12    2.97    1.23
   6   3 -12   33.92    5.21
   6  -2  12    4.65    1.22
   6   2 -12    0.72    0.68
   6   2 -12    1.02    1.04
   6   2 -12    1.14    1.65
  -6  -2  12    1.38    1.08
  -6   2 -12    3.47    1.55
  -6   2 -12    3.08    2.18
  -6  -2  12    1.56    1.16
  -6   2 -12    4.19    1.27
   6   1 -12   16.25    2.77
   6   1 -12   15.39    3.98
  -6  -1  12   17.25    2.68
  -6  -1  12   18.00    2.67
   6   0 -12    4.96    1.68
  -6   0 -12   20.03    4.38
   6  -1 -12   16.55    1.82
   6  -1 -12   16.13    2.82
   6  -1 -12   21.08    4.36
  -6   1  12   15.39    2.54
  -6   1  12   14.37    2.55
   6   2  12    4.89    1.03
   6  -2 -12    1.56    0.73
   6  -2 -12    1.72    1.22
   6  -2 -12    0.59    1.66
  -6  -2 -12    4.28    1.17
  -6  -2 -12    4.03    2.46
  -6  -2 -12    3.69    1.20
  -6   2  12    1.13    1.03
  -6   2  12    1.51    0.97
   6  -3 -12   33.69    3.74
   6  -3 -12   31.69    4.79
  -6   3  12   41.65    3.70
  -6   3  12   35.15    3.52
   6  -4 -12   -0.52    0.89
   6  -4 -12   -0.66    1.29
   6   4  12    2.67    0.78
  -6   4  12    0.94    1.04
  -6   4  12    0.59    0.73
  -6  -4 -12    1.90    0.91
   6  -5 -12    0.48    1.52
   6   5  12    2.07    0.75
  -6   5  12   -0.46    0.76
  -6  -5 -12    1.79    1.08
  -6   5  12    0.89    1.10
   6  -6 -12    8.77    3.11
  -6  -6 -12    5.80    1.72
  -6   6  12   12.49    2.51
  -6   6  12   11.26    2.56
   6  -7 -12    1.51    2.41
   7   6 -12   -0.02    1.86
  -7  -6  12   -0.09    1.12
  -7  -6  12    1.53    0.90
  -7   6 -12    6.00    2.64
   7   5 -12   -0.16    1.83
   7   5 -12    0.11    1.32
   7   5 -12    0.07    1.42
  -7  -5  12   -0.19    1.04
  -7   5 -12    2.11    1.78
   7   4 -12    0.37    1.73
   7   4 -12   -0.10    1.10
  -7   4 -12    1.89    1.62
  -7  -4  12    0.53    1.17
  -7   4 -12    4.53    2.97
   7   3 -12   10.74    3.85
  -7   3 -12   18.65    2.37
  -7  -3  12   10.91    2.49
  -7   3 -12   19.21    3.56
  -7   3 -12   19.06    5.04
   7  -2  12   16.65    2.20
  -7   2 -12   19.51    3.02
  -7   2 -12   21.91    2.42
  -7   2 -12   19.67    5.04
   7   1 -12    9.69    3.56
   7   1 -12    9.73    2.34
  -7  -1  12    8.73    2.26
  -7  -1  12   12.47    2.46
   7   0 -12   18.45    3.27
   7   0  12   32.52    2.68
   7   0 -12   17.70    4.57
  -7   0 -12   30.19    2.70
  -7   0  12   19.94    3.02
  -7   0  12   18.11    3.02
  -7   0 -12   32.27    3.40
  -7   0 -12   28.90    5.82
   7  -1 -12    8.26    2.19
   7  -1 -12    9.14    3.13
  -7   1  12    8.17    2.08
  -7   1  12    6.89    1.92
  -7  -1 -12    2.38    2.28
   7   2  12   24.88    2.28
  -7  -2 -12   20.46    2.64
  -7  -2 -12   18.86    4.71
  -7  -2 -12   21.27    2.43
   7  -3 -12    8.08    2.23
   7  -3 -12    6.23    2.85
  -7   3  12    7.91    2.01
  -7   3  12    8.64    2.16
   7   4  12    3.77    1.02
   7  -4 -12    0.69    1.67
   7  -4 -12   -1.45    0.96
  -7   4  12   -0.47    0.98
  -7  -4 -12    1.99    1.06
  -7   4  12   -0.03    0.76
   7  -5 -12   -0.47    1.71
  -7   5  12    1.16    1.35
  -7  -5 -12    1.18    1.08
  -7   5  12   -0.10    0.83
   7  -6 -12    0.65    1.87
  -7  -6 -12    5.16    1.66
  -7   6  12    0.52    1.23
  -7   6  12    0.43    1.12
   8   6 -12    1.31    2.28
  -8  -6  12    0.58    0.85
  -8  -6  12    0.92    1.51
   8   5 -12    8.40    3.85
  -8  -5  12    9.23    2.59
   8   4 -12    1.88    2.37
   8   4 -12    2.64    1.73
  -8   4 -12    0.69    1.43
  -8  -4  12    6.54    2.12
   8   3 -12    2.97    2.63
   8   3 -12    0.79    1.30
  -8   3 -12    3.90    2.06
  -8   3 -12    3.22    2.96
  -8  -3  12    1.81    1.31
   8   2 -12    8.33    3.49
   8   2 -12    6.48    2.12
  -8  -2  12    8.56    2.24
   8   1 -12    0.81    1.80
   8   1 -12    0.87    1.30
  -8   1 -12    5.48    2.96
  -8  -1  12    0.26    1.07
  -8   1 -12    5.69    2.02
  -8  -1  12    0.27    1.01
   8   0 -12   10.93    2.60
   8   0 -12   12.99    4.00
  -8   0  12   11.64    2.53
  -8   0  12    9.20    2.43
  -8   0 -12    3.41    2.86
   8  -1 -12    0.90    1.33
   8  -1 -12    0.92    1.71
   8   1  12    6.05    1.28
  -8  -1 -12    6.83    3.20
  -8   1  12   -0.15    0.92
  -8  -1 -12    6.14    1.94
  -8   1  12    0.26    0.98
   8  -2 -12    5.06    1.82
   8  -2 -12    4.01    2.72
  -8   2  12    6.85    1.93
  -8   2  12    7.01    2.07
   8   3  12    2.13    0.84
   8  -3 -12    0.58    2.00
   8  -3 -12    2.35    1.47
  -8   3  12    1.29    1.24
  -8  -3 -12    2.08    1.26
  -8   3  12    0.80    1.15
   8   4  12    3.17    1.10
   8  -4 -12    1.31    1.56
   8  -4 -12    1.69    2.24
  -8  -4 -12    1.42    1.02
  -8   4  12    5.26    1.79
  -8   4  12    2.84    1.48
   8  -5 -12    9.25    3.81
  -8   5  12    9.04    2.42
  -8   5  12   13.96    3.00
   8  -6 -12    0.27    2.24
  -8   6  12    0.73    1.32
   9   5 -12   -0.28    2.35
  -9  -5  12   -0.33    1.31
   9   4 -12    5.85    3.23
  -9  -4  12    7.96    2.36
   9   3 -12    0.38    2.13
   9   3 -12    2.01    1.57
  -9   3 -12    1.16    1.55
  -9  -3  12   -0.13    1.10
   9   2 -12   -1.03    1.93
   9   2 -12    0.71    1.38
  -9  -2  12   -0.71    1.09
  -9   2 -12    0.30    1.25
  -9   2 -12   -0.19    2.16
  -9   1 -12   16.75    5.08
   9   0  12    7.83    1.71
   9   0 -12   12.93    3.05
   9   0 -12   12.57    4.27
  -9   0  12   11.30    2.48
  -9   0 -12    9.47    2.48
  -9   0 -12    4.19    3.09
   9  -1 -12    1.15    2.25
  -9  -1 -12   18.59    5.27
   9  -2 -12   -0.38    1.23
   9  -2 -12   -0.60    1.81
   9   2  12   -0.13    0.60
  -9   2  12   -0.31    1.03
  -9  -2 -12    0.49    0.97
  -9   2  12   -0.42    0.89
   9  -3 -12    0.52    2.14
   9  -3 -12   -0.12    1.26
  -9   3  12    0.27    1.08
  -9  -3 -12   -0.16    0.89
  -9   3  12    0.09    1.06
   9  -4 -12    3.78    2.80
   9  -4 -12    3.71    2.04
  -9   4  12    2.94    1.68
  -9   4  12    5.72    2.00
   9  -5 -12   -0.28    1.95
  -9   5  12   -0.58    1.50
  10   4 -12    8.59    3.92
 -10  -4  12   13.93    3.17
  10   3 -12    0.96    2.34
 -10  -3  12   -0.22    1.30
  10   2 -12    5.39    2.33
  10   2 -12    2.81    2.87
 -10   2 -12    0.03    1.33
 -10  -2  12    4.33    1.98
  10   1 -12    1.67    2.71
  10   1 -12    2.16    1.60
 -10   1 -12    4.89    2.12
 -10  -1  12    2.36    1.58
  10   0 -12   13.75    4.64
  10   0 -12   12.26    3.04
 -10   0  12   16.26    3.05
  10  -1 -12    3.78    3.07
  10  -1 -12    0.89    1.42
 -10  -1 -12    4.81    1.87
 -10   1  12    3.53    1.73
  10  -2 -12    5.03    2.23
  10  -2 -12    6.29    3.41
 -10   2  12    5.77    2.01
  10  -3 -12    0.92    2.32
 -10   3  12   -0.11    1.07
  10  -4 -12   11.31    4.47
 -10   4  12    9.82    2.63
  11   2 -12    2.12    3.21
 -11  -2  12    0.56    1.57
  11   1 -12   -0.38    2.21
 -11  -1  12    1.34    1.60
  11   0 -12   13.57    4.95
 -11   0  12   17.15    3.43
  11  -1 -12    0.56    2.66
 -11   1  12    0.51    1.52
  11  -2 -12    1.78    2.93
 -11   2  12    1.66    1.62
   0   7 -13    0.21    1.26
   0  -7  13    0.29    1.18
   0   7 -13    1.85    1.38
   0   7 -13    1.14    1.73
   0  -7  13    1.31    1.00
   0   6 -13    1.23    1.77
   0  -6  13    1.89    1.29
   0  -6  13    2.46    1.02
   0   6 -13    2.80    2.15
   0   6 -13    2.12    1.32
   0   6 -13    1.80    1.28
   0   5 -13   12.20    3.29
   0   5 -13   11.71    2.31
   0   5 -13   10.77    2.26
   0   5 -13   12.40    3.59
   0  -5  13   12.72    1.98
   0  -5  13   11.95    2.23
   0   4 -13    0.39    0.84
   0   4 -13   -0.44    0.59
   0  -4  13    0.11    0.49
   0   4 -13   -0.32    0.95
   0   4 -13    0.25    1.21
   0  -4  13   -0.34    0.63
   0  -4  13    0.65    0.72
   0   3 -13    7.28    1.69
   0   3 -13    6.07    2.06
   0   3 -13    6.89    2.34
   0  -3  13    5.39    1.32
   0  -3  13    6.25    1.50
   0   3 -13    7.30    1.59
   0   2 -13    0.17    0.67
   0   2 -13    0.82    0.74
   0   2 -13    0.44    0.98
   0   2 -13    1.45    1.25
   0  -2  13    0.56    0.61
   0  -1  13    9.85    1.31
   0   1 -13   11.31    1.71
   0   1 -13   14.41    2.19
   0   1 -13   11.18    2.46
   0   0  13   -0.08    0.23
   0   0 -13    0.16    0.61
   0   0 -13    0.26    0.53
   0   0  13    0.00    0.24
   0  -1 -13   12.00    1.48
   0  -1 -13   11.04    1.62
   0   1  13   10.26    0.85
   0   1  13    9.92    0.85
   0  -2 -13    0.71    0.59
   0  -3 -13    6.34    1.45
   0  -4 -13   -0.18    0.53
   0   5  13   11.43    1.07
   0   6  13    1.79    0.64
   1   7 -13    0.51    1.76
   1   7 -13    0.89    1.28
   1  -7  13   12.38    2.21
  -1   7 -13   12.78    2.70
  -1   7 -13   10.95    3.41
  -1   7 -13   11.23    2.68
   1   6 -13    0.47    1.55
   1  -6  13    7.75    1.67
   1   6 -13    0.11    1.42
  -1   6 -13    9.35    2.34
  -1   6 -13    7.96    3.17
  -1   6 -13   10.81    2.39
  -1   6 -13   13.20    3.54
  -1  -6  13    0.80    0.95
   1   5 -13    7.63    1.94
   1  -5  13   10.98    1.81
   1  -5  13    8.38    1.84
   1   5 -13    5.02    1.76
   1   5 -13    8.72    2.99
   1   5 -13    7.93    2.90
  -1   5 -13   11.28    3.48
  -1   5 -13   11.12    2.29
  -1  -5  13    6.81    1.49
  -1   5 -13   11.91    2.31
  -1   5 -13   11.03    3.05
  -1  -5  13    8.85    1.99
   1   4 -13    0.05    0.72
   1   4 -13   -0.55    0.98
   1   4 -13    0.23    1.17
   1  -4  13    0.01    0.47
   1  -4  13   -0.09    0.61
   1   4 -13   -0.20    0.75
  -1   4 -13   -0.05    0.67
  -1  -4  13   -0.03    0.69
  -1   4 -13    0.19    1.07
  -1  -4  13    0.06    0.51
  -1   4 -13    0.12    1.20
  -1  -4  13    0.91    0.85
  -1   4 -13    0.53    0.73
   1   2 -13   27.22    2.64
   1   2 -13   32.32    2.93
   1   2 -13   28.37    3.56
   1   2 -13   26.34    3.47
  -1  -2  13   26.67    2.38
  -1  -2  13   29.62    2.71
   1  -1  13   22.01    1.95
  -1   1 -13   24.56    2.53
  -1   1 -13   19.97    3.04
  -1   1 -13   20.64    2.60
   1   0  13    0.03    0.26
   1   0 -13    0.20    0.53
   1   0 -13   -0.06    0.52
   1   0 -13    0.07    0.69
   1   0  13    0.04    0.26
  -1   0  13   -0.11    0.23
  -1   0 -13    0.52    0.65
  -1   0  13    0.03    0.31
  -1   0 -13   -0.25    0.44
   1  -2 -13   28.71    2.35
   1  -2 -13   28.03    2.68
   1  -4 -13    0.74    0.70
  -1  -4 -13   -0.23    0.50
  -1   5  13    7.04    1.02
  -1   5  13    7.90    0.91
   1   6  13    9.07    1.14
   1   6  13    8.26    1.10
   2   7 -13    1.39    1.43
   2  -7  13   -0.05    0.84
   2   7 -13    0.42    1.78
   2   7 -13    2.40    1.36
  -2  -7  13   -0.16    0.68
  -2  -7  13    0.16    1.07
  -2   7 -13   -0.28    1.20
  -2   7 -13    1.93    1.93
  -2   7 -13   -0.39    0.88
   2   6 -13    2.16    2.12
   2   6 -13    4.89    1.88
   2   6 -13    5.90    1.87
   2   6 -13    1.74    1.94
   2  -6  13    4.34    1.35
  -2   6 -13    7.39    2.20
  -2   6 -13    4.60    2.17
  -2  -6  13    3.33    1.22
  -2   6 -13    5.81    1.79
  -2  -6  13    3.71    1.56
  -2   6 -13    4.05    2.56
   2   5 -13   30.23    4.57
   2   5 -13   34.00    3.51
   2   5 -13   27.30    5.10
   2   5 -13   31.14    3.48
  -2  -5  13   31.64    2.74
  -2  -5  13   32.09    3.19
   2   4 -13    5.83    2.37
   2   4 -13    4.97    1.46
   2   4 -13    4.65    1.60
   2   4 -13    2.59    1.84
  -2  -4  13    4.87    1.61
  -2  -4  13    4.89    1.43
  -2  -4  13    5.68    1.21
  -2   4 -13    0.71    1.50
   2  -3  13    1.46    0.84
   2   3 -13    2.82    1.06
   2   3 -13    2.38    1.17
   2   3 -13    4.45    1.97
   2   3 -13    2.03    1.53
  -2   3 -13    0.23    1.19
  -2   3 -13    0.47    0.95
  -2  -3  13    3.15    1.20
  -2  -3  13    2.45    1.07
   2   0  13   -0.09    0.19
   2   0 -13    0.07    0.49
   2   0 -13   -0.20    0.56
   2   0 -13    0.22    0.76
  -2   0 -13   -0.31    0.45
  -2   0  13   -0.04    0.33
  -2   0 -13    0.42    0.56
  -2   0 -13    0.38    0.90
  -2   0  13   -0.37    0.46
   2  -2 -13   40.87    3.53
   2  -2 -13   42.17    3.36
  -2   2  13   39.20    2.50
  -2   2  13   37.65    2.24
   2  -3 -13    3.45    1.10
   2  -3 -13    3.13    1.21
  -2   3  13    3.14    0.44
  -2  -3 -13    1.25    0.80
  -2   3  13    3.16    0.65
   2  -4 -13    5.21    1.45
  -2   4  13    4.91    0.93
  -2   4  13    5.41    0.65
   2   5  13   13.52    1.41
   2   5  13   11.85    1.12
   2   6  13    6.27    1.04
  -2   6  13    3.79    1.02
   3   7 -13    1.58    1.31
   3   7 -13    1.86    2.04
   3  -7  13   -0.47    0.75
  -3  -7  13    1.65    1.29
  -3  -7  13    2.22    1.09
  -3   7 -13    0.01    1.52
   3   6 -13    2.99    2.05
   3   6 -13    1.16    1.17
   3   6 -13    1.76    1.44
   3  -6  13    0.18    0.78
   3   6 -13    2.19    2.21
  -3  -6  13    0.18    0.76
  -3   6 -13    0.01    0.84
  -3   6 -13    0.06    1.25
  -3  -6  13    1.72    1.25
  -3   6 -13    0.70    1.95
   3   5 -13    4.10    1.75
   3   5 -13    4.12    1.39
   3  -5  13    1.78    0.97
   3   5 -13    3.65    2.25
   3   5 -13    4.74    2.33
  -3   5 -13    1.51    1.11
  -3   5 -13    1.02    1.76
  -3  -5  13    2.27    1.27
  -3   5 -13   -0.34    1.15
  -3  -5  13    3.32    1.07
   3   4 -13   14.62    3.41
   3   4 -13   16.77    2.84
   3   4 -13   16.25    3.86
   3   4 -13   13.81    2.07
  -3  -4  13   15.32    2.54
  -3  -4  13   16.63    2.92
   3   3 -13    0.51    1.07
   3   3 -13   -0.29    0.56
   3   3 -13    0.03    1.12
   3  -3  13    3.14    1.13
   3   3 -13   -0.91    0.65
  -3   3 -13    1.17    1.15
  -3   3 -13    1.99    1.73
  -3  -3  13   -0.26    0.64
  -3  -3  13   -0.46    0.58
  -3   3 -13    2.32    1.08
   3   2 -13   13.61    3.24
   3   2 -13   12.52    1.86
   3   2 -13   14.12    2.83
   3   2 -13   13.39    2.33
  -3  -2  13   14.21    2.06
  -3  -2  13   13.68    2.15
  -3   1 -13    8.13    1.71
  -3   1 -13    7.23    2.43
  -3   1 -13    8.47    1.96
   3   0 -13   -0.01    0.48
   3   0 -13    0.18    0.99
   3   0 -13   -0.43    0.57
   3   0  13   -0.13    0.27
  -3   0 -13    0.22    1.18
  -3   0 -13   -0.31    0.46
  -3   0  13    0.09    0.44
  -3   0 -13   -0.21    0.52
  -3   0  13   -0.14    0.58
   3  -1 -13    0.81    1.04
  -3  -1 -13    8.20    1.57
   3  -2 -13   11.98    1.69
   3  -2 -13   12.41    2.10
   3  -2 -13   11.42    2.39
  -3   2  13   11.78    1.06
  -3   2  13   13.07    1.45
   3  -3 -13    0.89    0.87
   3  -3 -13    0.45    0.91
   3   3  13    1.97    0.57
   3  -3 -13   -0.22    0.51
  -3  -3 -13    2.60    0.65
  -3   3  13    0.23    0.24
  -3  -3 -13    3.67    1.21
  -3   3  13   -0.07    0.44
   3  -4 -13   15.46    2.84
   3  -5 -13    2.26    1.53
   3   5  13    1.46    0.53
  -3   5  13    4.45    1.14
   3   6  13    0.67    0.52
   3  -6 -13    1.72    1.52
  -3   6  13    1.50    0.83
   3  -7 -13    1.95    1.71
   4   7 -13    4.08    2.73
   4   7 -13    3.87    1.70
  -4  -7  13    3.10    1.18
  -4   7 -13    0.09    1.53
  -4  -7  13    3.49    1.77
   4   6 -13    7.84    2.02
   4   6 -13    5.67    2.16
   4   6 -13   10.87    3.78
   4   6 -13   10.85    3.43
   4  -6  13   17.84    2.62
  -4  -6  13    8.76    1.71
  -4   6 -13   18.68    4.97
  -4  -6  13    9.25    2.37
  -4   6 -13   21.14    4.23
   4   5 -13    2.50    1.17
   4   5 -13    2.53    2.10
   4   5 -13    3.22    1.55
   4   5 -13    3.49    2.08
   4  -5  13    3.48    1.29
  -4  -5  13    2.89    1.37
  -4   5 -13    3.01    1.40
  -4  -5  13    2.89    1.05
  -4   5 -13    3.13    2.55
  -4   5 -13    2.65    1.88
   4   4 -13   17.96    4.28
   4   4 -13   18.07    2.36
   4   4 -13   17.13    3.68
   4   4 -13   16.05    2.95
  -4  -4  13   19.43    2.86
  -4  -4  13   15.68    3.21
   4   3 -13    2.31    1.92
   4   3 -13    3.50    1.39
   4   3 -13    2.43    1.06
   4  -3  13    0.38    0.62
   4   3 -13    4.46    1.91
  -4   3 -13    0.41    0.76
  -4   3 -13    0.12    1.42
  -4  -3  13    2.09    1.21
  -4   3 -13    0.76    1.09
  -4  -3  13    2.48    1.21
   4   2 -13   28.68    3.08
   4   2 -13   28.94    2.74
   4   2 -13   30.83    4.32
   4  -2  13   26.88    2.54
  -4  -2  13   31.72    2.94
  -4   2 -13   22.84    4.63
  -4   2 -13   21.23    3.00
  -4   2 -13   24.31    2.79
  -4  -2  13   26.09    2.95
   4   1 -13   15.23    3.48
   4   1 -13   12.69    1.79
   4   1 -13   14.38    2.43
  -4  -1  13   10.09    1.96
  -4  -1  13   14.68    2.26
   4   0 -13   -0.04    0.49
   4   0 -13   -0.09    1.12
   4   0 -13   -0.18    0.69
   4   0  13    0.20    0.37
  -4   0 -13   -0.38    1.06
  -4   0 -13   -0.56    0.49
  -4   0  13   -0.27    0.63
  -4   0 -13    0.06    0.60
  -4   0  13    0.07    0.53
   4  -1 -13   12.68    2.30
   4  -1 -13   13.94    3.03
   4  -1 -13   14.19    1.75
  -4   1  13   13.99    1.86
  -4   1  13   15.15    2.28
   4   2  13   22.83    1.84
   4  -2 -13   29.69    3.76
   4  -2 -13   28.99    2.65
   4  -2 -13   30.27    2.96
  -4  -2 -13   23.45    2.59
  -4   2  13   30.73    2.66
  -4  -2 -13   22.74    2.22
  -4   2  13   28.17    2.71
   4  -3 -13    3.63    1.13
   4  -3 -13    2.65    1.24
   4  -3 -13    2.70    1.61
  -4   3  13    3.09    1.04
  -4   3  13    1.72    1.03
   4  -4 -13   20.20    3.02
   4  -4 -13   18.42    3.53
  -4   4  13   22.14    2.35
   4  -5 -13    0.64    1.45
   4   5  13    2.07    0.66
  -4   5  13    3.09    1.13
   4  -6 -13   10.15    2.96
  -4   6  13   10.34    1.98
   4  -7 -13    4.88    2.39
   5   7 -13   -0.71    1.63
  -5  -7  13    0.09    0.74
  -5  -7  13    0.89    1.39
   5   6 -13    9.38    2.12
   5   6 -13   12.45    3.84
   5  -6  13    7.75    1.94
   5   6 -13    8.39    2.47
   5   6 -13    5.13    2.87
  -5  -6  13    8.89    2.33
  -5   6 -13    6.95    1.97
  -5   6 -13    9.51    3.19
  -5  -6  13   11.14    1.97
   5   5 -13    4.74    1.95
   5  -5  13    2.66    1.23
   5   5 -13    7.28    1.72
   5   5 -13    8.59    3.32
   5   5 -13    4.78    2.23
  -5  -5  13    6.94    1.43
  -5  -5  13    7.16    2.01
  -5   5 -13    3.93    2.65
  -5   5 -13    2.04    1.23
  -5   5 -13    3.53    1.96
   5   4 -13    7.95    3.16
   5   4 -13    6.18    1.62
   5  -4  13    7.30    1.66
   5   4 -13    6.24    2.01
   5   4 -13    5.57    2.23
  -5  -4  13    6.01    1.83
  -5   4 -13    7.03    1.79
  -5   4 -13    6.95    3.18
  -5   4 -13    6.32    2.32
   5   3 -13    7.51    2.07
   5   3 -13    6.70    2.80
   5   3 -13    7.64    2.34
   5   3 -13    5.93    1.43
  -5  -3  13    6.43    1.97
  -5  -3  13    4.04    1.46
   5   2 -13   16.57    2.05
   5  -2  13   14.37    1.88
   5   2 -13   13.80    3.65
   5   2 -13   19.53    3.12
  -5   2 -13   11.54    2.17
  -5  -2  13   16.74    2.63
  -5   2 -13   10.50    2.58
  -5   2 -13   14.48    3.93
  -5  -2  13   14.52    2.64
   5   1 -13   13.51    1.83
   5   1 -13   16.84    2.79
   5   1 -13   14.39    3.63
  -5  -1  13   15.37    2.52
  -5  -1  13   14.66    2.55
   5   0 -13    0.16    0.53
   5   0  13    0.46    0.46
   5   0 -13    0.86    1.30
   5   0 -13   -0.36    0.78
  -5   0  13   -0.39    0.66
  -5   0  13   -0.36    0.53
  -5   0 -13   -0.45    0.52
  -5   0 -13   -0.49    0.48
  -5   0 -13    0.14    1.36
   5  -1 -13   16.32    1.87
   5  -1 -13   12.47    2.46
   5  -1 -13   17.01    3.66
  -5   1  13   15.28    2.19
  -5   1  13   15.50    2.45
   5  -2 -13   15.22    2.65
   5  -2 -13   17.02    1.93
   5   2  13   15.86    1.52
   5  -2 -13   16.51    3.60
  -5   2  13   16.74    2.21
  -5  -2 -13   12.69    1.95
  -5   2  13   16.21    2.51
  -5  -2 -13   12.72    1.81
   5  -3 -13    7.99    1.96
   5  -3 -13    6.25    2.31
  -5   3  13    7.43    1.75
  -5   3  13    6.01    1.54
   5   4  13    6.53    1.00
   5  -4 -13    6.22    1.95
   5  -4 -13    7.55    2.70
  -5   4  13    6.00    1.69
  -5   4  13    8.21    1.84
  -5  -4 -13    8.28    1.49
   5  -5 -13    7.12    2.73
  -5   5  13    9.36    2.02
   5  -6 -13    9.21    3.07
  -5   6  13    8.25    1.93
   5  -7 -13    0.54    1.89
   6   6 -13    9.60    3.75
   6   6 -13    6.13    3.05
  -6  -6  13    9.91    1.87
  -6  -6  13    7.19    2.18
  -6   6 -13    5.84    2.71
   6   5 -13   10.31    3.78
   6  -5  13   14.63    2.46
   6   5 -13    7.64    2.30
   6   5 -13    7.99    2.84
  -6  -5  13    6.56    2.07
  -6   5 -13   16.61    3.87
   6   4 -13    0.81    1.27
   6   4 -13    0.98    2.07
   6  -4  13    1.57    1.00
   6   4 -13    0.36    1.32
   6   4 -13    2.19    1.08
  -6   4 -13    1.71    1.51
  -6   4 -13    2.28    2.40
  -6   4 -13    2.63    1.22
  -6  -4  13    0.74    1.29
   6   3 -13    0.88    1.63
   6  -3  13    5.66    1.53
   6   3 -13    1.03    1.20
  -6   3 -13    8.10    1.84
  -6   3 -13    6.92    2.24
  -6  -3  13    0.15    0.96
  -6  -3  13    0.76    1.16
  -6   3 -13    6.27    3.02
   6  -2  13    0.94    0.77
   6   2 -13    0.37    0.60
   6   2 -13   -0.88    0.85
   6   2 -13    0.59    1.61
  -6   2 -13    1.01    1.79
  -6  -2  13   -0.44    0.80
  -6  -2  13    0.06    0.81
  -6   2 -13    1.19    1.19
  -6   2 -13    0.31    0.70
   6   1 -13    9.60    3.29
   6   1 -13    8.72    2.23
   6   1 -13    8.04    1.52
  -6  -1  13    8.27    2.10
  -6  -1  13   10.36    2.16
  -6   1 -13    0.36    1.74
   6   0 -13   -0.56    0.85
   6   0  13   -0.03    0.40
   6   0 -13   -0.31    0.42
   6   0 -13   -0.33    1.32
  -6   0 -13   -0.80    1.19
  -6   0  13   -0.23    0.81
  -6   0  13    0.12    0.78
  -6   0 -13   -0.23    0.56
  -6   0 -13    0.55    0.83
   6  -1 -13   10.73    2.37
   6  -1 -13    8.01    2.86
   6  -1 -13   11.16    1.61
  -6   1  13    8.94    1.99
  -6   1  13    9.24    2.11
   6  -2 -13    0.39    1.01
   6  -2 -13    0.44    1.43
   6   2  13    0.50    0.50
   6  -2 -13   -0.06    0.48
  -6   2  13   -0.28    0.82
  -6   2  13    0.44    0.83
  -6  -2 -13    0.43    0.61
  -6  -2 -13    1.39    0.90
   6  -3 -13    1.31    1.20
   6  -3 -13   -0.49    1.20
  -6   3  13    0.89    0.95
  -6   3  13    0.59    0.85
   6   4  13    1.95    0.75
   6  -4 -13    2.02    1.86
   6  -4 -13    1.16    1.32
  -6   4  13    0.92    1.18
  -6  -4 -13    1.47    0.88
  -6   4  13    1.01    0.85
   6  -5 -13    7.92    2.91
  -6   5  13    4.72    1.65
   6  -6 -13    6.12    3.08
   7   6 -13    5.63    3.22
  -7  -6  13    6.90    2.30
  -7  -6  13    7.79    1.78
   7   5 -13   18.31    3.63
   7   5 -13   20.85    4.39
   7   5 -13   23.19    5.65
  -7  -5  13   20.10    3.40
   7   4 -13    0.83    2.30
   7   4 -13    1.38    1.45
  -7  -4  13    0.95    1.22
  -7   4 -13    1.40    1.67
  -7   4 -13    0.61    2.35
   7   3 -13   -0.41    1.44
   7   3 -13    2.29    1.39
  -7  -3  13    1.39    1.32
  -7   3 -13    3.87    1.90
  -7   3 -13    8.32    3.69
  -7   3 -13    6.25    1.62
   7   2 -13    2.76    2.24
   7  -2  13   10.61    2.02
   7   2 -13    3.59    1.70
  -7   2 -13    9.67    2.49
  -7   2 -13    8.10    1.76
  -7  -2  13    4.64    1.76
  -7   2 -13    7.64    3.46
  -7  -2  13    4.40    1.84
   7   1 -13    6.71    2.13
   7   1 -13    6.39    3.11
   7  -1  13   13.02    1.82
  -7   1 -13   12.33    4.04
  -7   1 -13   12.67    2.14
  -7   1 -13   13.66    2.86
  -7  -1  13    7.16    2.03
  -7  -1  13    7.65    2.17
   7   0  13   -0.12    0.40
   7   0 -13    0.99    1.95
   7   0 -13   -0.08    1.07
  -7   0  13   -0.97    0.81
  -7   0 -13   -0.05    0.73
  -7   0 -13    1.75    2.04
  -7   0  13   -0.42    0.81
  -7   0 -13    0.03    0.58
   7  -1 -13    7.27    2.97
   7   1  13   12.75    1.59
   7  -1 -13    7.26    2.18
  -7  -1 -13   13.65    1.98
  -7  -1 -13   12.50    2.37
  -7  -1 -13   12.51    3.95
  -7   1  13    7.42    2.04
   7  -2 -13    3.62    2.26
   7  -2 -13    3.89    1.72
  -7   2  13    3.52    1.45
  -7   2  13    1.92    1.19
  -7  -2 -13    9.67    1.98
   7  -3 -13    0.74    1.14
   7  -3 -13    2.19    2.01
  -7   3  13    1.06    1.07
  -7   3  13    2.11    1.42
  -7  -3 -13    6.37    1.65
   7  -4 -13    2.20    1.98
   7  -4 -13    1.21    1.45
   7   4  13    1.80    0.82
  -7  -4 -13    0.73    0.82
  -7   4  13    1.08    1.42
  -7   4  13    1.01    1.06
   7  -5 -13   18.73    4.66
  -7   5  13   22.66    3.66
  -7   5  13   25.81    3.34
   7  -6 -13    3.48    2.91
  -8  -5  13   14.02    3.08
   8   4 -13    2.71    2.45
   8   4 -13    0.64    1.35
  -8  -4  13    0.01    1.26
  -8   4 -13    0.74    1.45
   8   3 -13   -1.21    1.65
   8   3 -13    0.83    1.46
  -8   3 -13    1.50    1.60
  -8  -3  13    0.46    1.16
   8   2 -13   -0.39    1.09
   8   2 -13    2.60    2.71
  -8   2 -13    0.31    1.92
  -8   2 -13    0.42    1.29
  -8  -2  13   -0.13    1.05
   8   1 -13   22.21    3.91
   8   1 -13   25.25    5.75
  -8  -1  13   23.58    3.55
  -8  -1  13   26.22    3.70
   8   0 -13    0.63    1.22
   8   0 -13    0.29    1.72
   8   0  13   -0.18    0.55
  -8   0  13    0.26    1.19
  -8   0 -13   -0.34    0.87
  -8   0  13   -0.51    1.00
  -8   0 -13    1.29    1.92
   8  -1 -13   23.54    5.31
   8  -1 -13   27.26    4.10
  -8   1  13   25.58    3.48
  -8   1  13   23.76    3.48
   8  -2 -13    0.27    1.89
   8   2  13   -0.02    0.56
   8  -2 -13    0.41    1.15
  -8  -2 -13    0.34    0.81
  -8   2  13    0.02    1.02
  -8   2  13   -0.47    0.86
   8  -3 -13    0.78    1.34
   8  -3 -13   -0.05    1.75
  -8   3  13    2.04    1.40
  -8   3  13    0.25    1.06
  -8  -3 -13   -0.48    0.77
   8  -4 -13   -0.55    1.95
   8  -4 -13    1.08    1.60
  -8   4  13    0.48    0.97
  -8  -4 -13    0.74    0.96
  -8   4  13    0.25    1.15
   8  -5 -13   12.10    3.98
  -8   5  13   20.80    3.67
   9   4 -13    5.40    3.40
  -9  -4  13    9.16    2.60
   9   3 -13    0.50    2.27
   9   3 -13    1.07    1.58
  -9  -3  13   -0.57    1.04
   9   2 -13    1.18    2.34
   9   2 -13    1.19    1.62
  -9   2 -13    4.89    2.09
  -9  -2  13    0.62    1.20
   9   1 -13    9.16    4.05
   9   1 -13   16.30    3.54
  -9  -1  13   12.93    2.73
   9   0 -13   -0.28    1.30
   9   0  13    0.10    0.74
   9   0 -13    0.39    2.01
  -9   0  13   -0.78    0.99
  -9   0 -13   -1.34    1.80
  -9   0 -13   -0.43    0.97
   9  -1 -13   11.98    2.95
   9  -1 -13   16.11    4.78
  -9   1  13   16.87    3.20
  -9   1  13   15.59    3.23
   9  -2 -13    0.15    2.12
   9  -2 -13    1.34    1.60
  -9   2  13   -0.03    1.12
  -9   2  13   -0.17    1.14
   9  -3 -13   -0.28    1.96
   9  -3 -13    0.56    1.67
  -9  -3 -13    6.84    1.97
  -9   3  13    1.64    1.48
  -9   3  13    0.85    1.32
   9  -4 -13    8.58    3.75
  -9   4  13   11.27    2.65
  10   3 -13    0.18    2.58
 -10  -3  13    0.50    1.43
  10   2 -13   15.24    5.18
 -10  -2  13   11.64    2.78
  10   1 -13    1.50    2.54
 -10  -1  13   -0.20    1.19
  10   0 -13    0.74    2.36
 -10   0  13   -0.39    1.29
  10  -1 -13    1.14    2.17
 -10   1  13    1.80    1.53
  10  -2 -13   11.81    4.42
 -10   2  13   12.93    3.00
  10  -3 -13   -1.22    2.26
 -10   3  13    0.02    1.34
   0   7 -14    2.09    2.05
   0  -7  14    1.04    0.97
   0   6 -14    4.24    2.49
   0  -6  14    4.26    1.66
   0   6 -14    5.29    2.55
   0   6 -14    4.21    1.69
   0   6 -14    4.98    1.73
   0  -6  14    3.51    1.27
   0   5 -14    3.15    2.16
   0  -5  14    2.61    1.04
   0   5 -14    3.25    1.35
   0  -5  14    2.83    1.36
   0   5 -14    3.21    1.44
   0   5 -14    1.37    1.48
   0  -4  14    8.99    2.06
   0   4 -14    6.64    2.36
   0   4 -14    7.61    1.87
   0   4 -14    7.91    1.94
   0   4 -14    6.70    2.71
   0  -4  14    9.07    1.55
   0   3 -14   45.92    4.00
   0   3 -14   42.97    5.13
   0   3 -14   45.88    4.91
   0  -3  14   45.79    3.89
   0   2 -14    0.31    0.70
   0   2 -14    0.09    0.85
   0   2 -14    0.27    1.05
   0  -2  14    0.64    0.62
   0  -1  14   25.03    2.25
   0   1 -14   28.20    3.15
   0   1 -14   25.22    2.73
   0   0 -14    5.08    1.44
   0   0  14    4.50    0.89
   0   0 -14    4.58    1.35
   0  -1 -14   25.72    2.67
   0   1  14   26.92    1.79
   0   1  14   26.01    1.75
   0  -1 -14   27.06    2.42
   0  -2 -14    1.13    0.77
   0  -3 -14   44.60    3.78
   0  -4 -14    7.94    1.72
   0   6  14    4.52    0.89
   1  -7  14    8.75    1.96
   1   7 -14    2.12    2.11
  -1  -7  14    4.73    1.43
  -1   7 -14   11.09    3.55
  -1  -7  14    3.62    1.71
   1  -6  14    1.53    1.00
   1   6 -14    3.42    2.18
   1   6 -14    1.46    1.45
   1   6 -14    1.34    1.15
   1   6 -14    0.94    1.87
  -1  -6  14    1.10    1.15
  -1   6 -14    0.32    1.45
  -1  -6  14    1.19    0.86
  -1   6 -14    2.55    2.36
  -1   6 -14    1.77    1.22
   1  -5  14    3.25    1.13
   1   5 -14    5.66    2.62
   1   5 -14    3.96    2.12
   1   5 -14    4.72    1.59
   1   5 -14    4.37    1.64
  -1   5 -14    1.98    1.78
  -1   5 -14    1.85    1.63
  -1  -5  14    3.55    1.15
  -1   5 -14    2.82    1.33
  -1  -5  14    3.86    1.37
   1   4 -14    1.72    1.05
   1  -4  14    0.37    0.77
   1   4 -14    0.37    0.99
   1   4 -14    0.74    1.45
   1   4 -14    1.62    1.51
  -1  -4  14    0.79    0.94
  -1   4 -14    0.01    1.11
  -1  -4  14    0.38    0.56
  -1   4 -14    0.45    0.89
  -1  -4  14    1.00    0.92
  -1   4 -14    2.00    1.83
   1   3 -14   21.39    3.44
   1   3 -14   22.37    2.64
   1   3 -14   16.77    2.63
   1   3 -14   19.12    3.70
  -1  -3  14   24.53    2.73
  -1  -3  14   22.43    2.50
   1   2 -14   -0.44    0.80
   1   2 -14    0.28    0.73
   1   2 -14    0.55    0.68
   1  -2  14    0.07    0.48
  -1   2 -14    0.31    0.86
  -1  -2  14   -0.19    0.52
  -1   2 -14    0.86    0.79
  -1   2 -14    0.71    1.20
   1   1 -14    6.16    1.86
   1  -1  14    4.42    1.05
   1   1 -14    7.24    1.58
  -1   1 -14    5.15    1.48
  -1  -1  14    6.58    1.31
  -1   1 -14    6.72    1.81
   1   0 -14    3.23    1.15
  -1   0 -14   10.86    1.69
  -1   0 -14   10.54    1.89
   1   1  14    4.24    0.66
   1   1  14    4.50    0.62
   1  -1 -14    6.92    1.53
   1  -1 -14    6.51    1.52
  -1   1  14    6.38    0.72
  -1  -1 -14    4.88    1.08
  -1  -1 -14    4.65    1.35
  -1   1  14    6.07    0.84
   1  -2 -14    0.24    0.53
   1  -2 -14    0.14    0.52
  -1  -2 -14    0.63    0.67
  -1  -3 -14    8.03    1.68
   1  -4 -14    0.50    0.67
  -1  -4 -14    0.40    0.70
  -1   5  14    4.79    0.89
  -1   5  14    3.79    0.68
   1   6  14    1.55    0.57
  -1   6  14    0.52    0.47
   2   7 -14    0.09    1.66
   2  -7  14   -0.10    0.86
  -2  -7  14    0.05    0.75
  -2   7 -14    0.80    1.80
  -2  -7  14    0.51    1.24
   2  -6  14    0.27    0.74
   2   6 -14    0.71    1.77
   2   6 -14   -0.84    0.70
   2   6 -14   -0.09    1.64
   2   6 -14    0.67    1.26
  -2  -6  14   -0.40    0.60
  -2   6 -14   -0.74    1.60
  -2   6 -14    0.33    1.39
  -2  -6  14    0.91    1.06
  -2   6 -14   -0.06    0.91
   2   5 -14   -0.20    1.26
   2   5 -14   -0.53    0.94
   2   5 -14    0.02    1.40
   2   5 -14    0.23    0.77
   2  -5  14    0.01    0.61
  -2  -5  14    0.16    0.82
  -2   5 -14    0.26    0.96
  -2   5 -14    0.91    1.73
  -2  -5  14    0.61    0.73
  -2   5 -14    0.29    1.31
   2   4 -14   14.04    3.54
   2   4 -14   16.11    3.75
   2   4 -14   14.17    2.62
   2   4 -14   17.36    2.47
   2  -4  14   16.11    2.38
  -2   4 -14   17.86    2.52
  -2   4 -14   18.59    3.65
  -2   4 -14   14.81    3.84
  -2  -4  14   16.08    2.85
  -2  -4  14   18.22    2.65
  -2  -4  14   15.13    1.78
   2   3 -14   14.58    2.14
   2   3 -14   16.64    3.63
   2   3 -14   16.18    3.47
   2   3 -14   14.85    2.48
  -2  -3  14   15.79    2.36
  -2  -3  14   16.18    2.41
   2   2 -14    1.35    0.87
   2   2 -14    0.99    1.26
   2   2 -14    1.31    0.96
   2  -2  14    1.91    0.88
  -2   2 -14    2.26    1.27
  -2  -2  14    1.96    0.96
  -2   2 -14    2.90    1.80
  -2  -2  14    0.84    0.81
  -2   2 -14    2.73    1.16
   2  -1  14    5.40    1.15
  -2   1 -14    6.66    1.69
  -2   1 -14    9.01    1.86
  -2   1 -14    7.63    2.55
   2   0  14   28.39    2.14
   2   0 -14   28.67    2.81
   2   0 -14   25.61    2.67
   2   0 -14   28.59    3.38
  -2   0  14   28.06    2.43
  -2   0 -14   27.98    2.88
  -2   0 -14   30.62    2.82
   2   1  14    6.53    0.88
   2   1  14    5.49    0.73
  -2  -1 -14    6.05    1.16
  -2  -1 -14    5.98    1.47
   2   2  14    2.01    0.40
   2  -2 -14    0.76    0.87
   2  -2 -14    1.19    0.79
  -2  -2 -14    3.24    1.12
  -2  -2 -14    2.04    0.66
  -2   2  14    1.70    0.55
  -2   2  14    1.13    0.35
   2  -3 -14   15.03    2.07
  -2   3  14   16.48    1.15
  -2   3  14   17.07    1.45
  -2   4  14   16.69    1.56
  -2   4  14   16.47    1.20
  -2  -4 -14   12.32    2.00
   2   5  14   -0.01    0.29
  -2   5  14   -0.20    0.48
   2   6  14   -0.10    0.39
  -2   6  14   -0.22    0.46
   3   7 -14    5.10    2.87
  -3  -7  14    4.23    1.95
  -3  -7  14    4.76    1.52
   3   6 -14    8.65    3.27
   3   6 -14    7.02    2.36
   3   6 -14    5.99    1.78
   3   6 -14    4.92    2.68
  -3  -6  14    5.78    1.57
  -3  -6  14    8.15    2.24
   3  -5  14    1.31    0.96
   3   5 -14    1.76    1.79
   3   5 -14    1.34    1.35
   3   5 -14    0.73    0.94
   3   5 -14    0.85    1.56
  -3   5 -14    1.43    2.06
  -3  -5  14    1.93    1.21
  -3   5 -14    1.33    1.08
  -3  -5  14    1.21    0.81
  -3   5 -14    1.99    1.59
   3   4 -14    0.22    1.03
   3  -4  14    8.74    1.96
   3   4 -14    1.08    1.45
   3   4 -14    0.49    1.29
  -3   4 -14    9.31    3.28
  -3   4 -14    8.30    1.99
  -3  -4  14    1.56    1.08
  -3   4 -14   10.47    2.72
   3   3 -14   14.98    2.11
   3   3 -14   18.25    3.63
   3   3 -14   19.22    4.10
   3   3 -14   15.82    2.71
  -3  -3  14   14.24    2.59
  -3  -3  14   14.29    2.32
   3   2 -14    9.40    1.88
   3   2 -14    9.96    2.87
   3   2 -14    9.67    2.07
  -3  -2  14    8.63    1.89
  -3  -2  14    9.39    1.89
   3   1 -14    7.51    2.30
   3   1 -14    7.30    1.79
   3   1 -14    8.55    1.73
  -3  -1  14    8.55    1.72
  -3  -1  14    6.04    1.51
   3   0 -14   22.27    2.41
   3   0 -14   16.89    2.62
   3   0 -14   20.83    3.12
  -3   0  14   20.57    2.22
  -3   0  14   18.33    2.17
   3  -1 -14    8.03    2.15
   3  -1 -14    9.49    1.93
   3  -1 -14    7.73    1.56
  -3   1  14    6.60    1.33
   3  -2 -14    8.35    1.70
   3  -2 -14    9.48    2.21
   3  -3 -14   16.09    2.15
   3  -3 -14   17.56    2.60
   3  -4 -14    1.82    1.22
   3   5  14    1.46    0.51
  -3   5  14    0.20    0.61
  -3   6  14    7.27    1.51
   4   6 -14    0.63    1.82
   4  -6  14    1.48    1.08
   4   6 -14    0.92    1.09
   4   6 -14    0.80    1.71
   4   6 -14    0.73    1.32
  -4   6 -14    3.47    1.73
  -4  -6  14    0.21    0.72
  -4  -6  14   -0.34    0.98
  -4   6 -14    3.11    1.99
   4   5 -14    1.04    1.92
   4   5 -14    2.67    1.31
   4  -5  14    6.79    1.72
   4   5 -14    0.62    1.37
   4   5 -14    1.16    1.78
  -4   5 -14    2.95    2.59
  -4   5 -14    3.96    1.55
  -4  -5  14    1.77    0.88
  -4   5 -14    6.54    2.56
  -4  -5  14    1.54    1.30
   4   4 -14    2.53    1.47
   4   4 -14    5.80    1.63
   4  -4  14    5.14    1.46
   4   4 -14    4.35    2.38
   4   4 -14    6.38    2.43
   4  -4  14    6.96    1.93
  -4   4 -14    6.68    2.44
  -4  -4  14    6.46    1.75
  -4   4 -14    4.79    1.57
  -4   4 -14    6.08    2.85
   4   3 -14    1.59    1.10
   4   3 -14    0.43    1.43
   4  -3  14    0.21    0.63
   4   3 -14    0.35    0.74
  -4  -3  14   -0.24    0.72
  -4  -3  14   -0.01    0.78
  -4   3 -14    0.45    0.84
  -4   3 -14    0.23    0.95
  -4   3 -14    0.64    1.72
   4   2 -14    2.19    1.02
   4   2 -14    2.63    1.34
   4   2 -14    2.23    1.82
  -4   2 -14    0.35    1.37
  -4  -2  14    2.85    1.19
  -4   2 -14    0.29    0.73
  -4  -2  14    3.10    1.27
  -4   2 -14    0.22    0.90
   4   1 -14    2.23    0.95
   4  -1  14   -0.39    0.36
   4   1 -14    1.10    1.00
   4   1 -14    2.18    1.64
  -4   1 -14    0.45    0.84
  -4   1 -14    0.57    0.73
  -4  -1  14    3.18    1.26
  -4   1 -14   -0.58    1.18
  -4  -1  14    1.25    0.87
   4   0 -14   31.54    3.38
   4   0 -14   38.54    3.32
   4   0 -14   39.87    4.73
  -4   0  14   37.79    3.28
  -4   0  14   34.52    3.24
   4  -1 -14    1.41    1.40
   4  -1 -14    1.09    0.72
   4  -1 -14    1.70    1.08
  -4  -1 -14    0.44    0.61
  -4  -1 -14   -0.24    0.50
  -4   1  14    1.32    0.80
  -4   1  14    1.65    1.03
   4  -2 -14    1.10    1.30
   4  -2 -14    2.55    1.03
   4  -2 -14    2.24    1.22
  -4   2  14    2.16    0.89
   4   3  14    0.04    0.29
   4  -3 -14   -0.14    0.50
   4  -3 -14   -0.36    1.10
  -4   3  14   -0.21    0.53
  -4  -3 -14   -0.21    0.62
   4   4  14    4.70    0.83
   4  -4 -14    5.07    2.08
  -4   4  14    5.44    1.36
   4  -5 -14    2.82    1.78
   4   5  14    5.59    0.98
  -4   5  14    3.06    1.13
   5   6 -14    8.65    2.09
   5   6 -14    8.03    3.47
  -5  -6  14   11.05    2.04
  -5  -6  14   11.99    2.71
   5   5 -14   -0.06    0.79
   5   5 -14   -0.49    1.07
   5   5 -14   -0.71    1.67
   5  -5  14    4.68    1.45
   5   5 -14    0.56    1.54
  -5  -5  14    0.23    1.07
  -5   5 -14    4.60    2.33
  -5  -5  14   -0.39    0.62
   5   4 -14   14.30    2.93
   5   4 -14   15.31    4.49
  -5  -4  14   18.41    3.07
   5   3 -14    0.41    0.73
   5  -3  14    0.99    0.89
   5   3 -14    0.38    1.09
   5   3 -14   -0.26    1.32
  -5   3 -14    1.68    1.09
  -5  -3  14    0.96    1.08
  -5  -3  14    0.82    1.10
  -5   3 -14    2.01    2.14
  -5   3 -14    0.37    1.23
   5  -2  14    9.65    1.79
  -5   2 -14   12.55    2.83
  -5   2 -14   11.68    3.75
  -5   2 -14    8.46    1.90
  -5   1 -14   12.64    2.52
  -5   1 -14   15.66    4.16
   5   0  14    5.69    1.22
   5   0 -14   13.50    3.49
   5   0 -14    8.60    2.11
  -5   0 -14    6.95    1.74
  -5   0  14   12.45    2.33
  -5   0  14   13.53    2.42
  -5   0 -14    7.52    1.66
   5  -2 -14    1.44    1.56
   5  -2 -14    0.79    0.98
   5  -2 -14    2.28    0.93
  -5   2  14    1.34    1.06
  -5   2  14    1.15    0.94
   5  -3 -14    0.85    1.20
   5  -3 -14    1.31    1.65
   5   3  14    1.15    0.55
   5  -3 -14    0.50    0.68
  -5   3  14    0.38    0.71
  -5  -3 -14    1.64    0.93
  -5  -3 -14    0.72    0.68
   5  -4 -14   10.47    3.18
  -5   4  14   16.35    2.29
   5  -5 -14    0.85    1.63
  -5   5  14   -0.18    0.67
   5  -6 -14    7.11    2.83
   6   6 -14   10.69    4.06
  -6  -6  14   10.81    2.05
  -6  -6  14    7.20    2.30
   6   5 -14    0.97    1.63
   6   5 -14    1.18    1.63
   6  -5  14    0.62    0.93
   6   5 -14    1.97    2.26
  -6   5 -14   -0.13    0.92
  -6  -5  14   -0.02    1.12
  -6   5 -14    0.89    1.63
  -6  -5  14    1.62    0.99
   6   4 -14    0.50    1.29
   6  -4  14    0.99    0.98
   6   4 -14    1.02    1.87
  -6   4 -14    0.78    2.15
  -6   4 -14    2.05    1.20
  -6  -4  14    0.27    1.05
  -6   4 -14    1.09    1.49
   6  -3  14   10.78    2.20
  -6   3 -14   10.85    2.82
  -6   3 -14   11.74    2.26
  -6   3 -14    9.06    3.67
   6   2 -14    4.44    2.40
   6   2 -14    4.70    1.31
   6   2 -14    3.49    1.66
  -6   2 -14    0.25    1.09
  -6  -2  14    3.16    1.52
  -6  -2  14    2.99    1.48
   6   1 -14   14.81    4.11
   6  -1  14   16.74    2.01
   6   1 -14   11.12    2.55
   6   1 -14   15.20    2.02
  -6   1 -14   19.03    2.40
  -6  -1  14   15.84    2.83
  -6   1 -14   17.92    4.66
  -6  -1  14   13.09    2.73
  -6   1 -14   17.23    2.58
   6  -1 -14   14.65    1.97
   6  -1 -14   10.18    2.41
   6  -1 -14   12.03    3.53
   6   1  14   17.44    1.81
  -6   1  14   12.06    2.52
  -6   1  14   15.61    2.64
  -6  -1 -14   16.46    2.17
  -6  -1 -14   15.96    2.21
   6  -2 -14    2.50    2.07
   6  -2 -14    4.09    1.63
   6  -2 -14    4.24    1.17
  -6   2  14    2.40    1.32
  -6   2  14    4.02    1.52
   6  -3 -14    0.23    1.14
   6  -3 -14   -0.16    1.61
  -6  -3 -14    8.48    1.74
  -6  -3 -14    8.81    1.66
  -6   3  14    0.02    0.92
  -6   3  14    0.77    0.88
   6  -4 -14   -0.47    1.11
   6  -4 -14    2.27    1.97
  -6   4  14    0.48    0.91
  -6  -4 -14    1.68    0.87
   6  -5 -14    0.48    1.71
  -6   5  14    1.79    1.25
   6  -6 -14    8.21    3.06
   7   5 -14    1.97    2.54
  -7  -5  14    2.71    1.58
   7   4 -14    5.54    3.03
   7   4 -14    2.09    1.70
  -7   4 -14    8.98    2.85
  -7  -4  14    5.31    2.03
   7   3 -14    4.11    1.93
   7   3 -14    5.90    2.92
  -7  -3  14    3.89    1.75
  -7   3 -14    2.84    2.86
  -7   3 -14    1.74    1.51
   7  -2  14    5.01    1.46
   7   2 -14    5.94    2.07
   7   2 -14    4.23    2.77
  -7   2 -14    2.45    1.17
  -7   2 -14    2.31    2.55
  -7  -2  14    5.86    1.99
  -7   2 -14    4.76    1.84
  -7  -2  14    5.29    2.01
   7   1 -14    0.45    1.73
   7   1 -14    1.31    1.33
   7  -1  14   -0.11    0.49
  -7  -1  14   -0.13    0.93
  -7   1 -14   -0.31    0.67
  -7   1 -14   -0.48    0.84
  -7  -1  14    0.00    0.97
  -7   1 -14    0.68    2.12
   7   0 -14   12.04    3.67
   7   0 -14   10.05    2.53
   7   0  14    4.09    1.20
  -7   0  14   10.58    2.32
  -7   0  14    6.47    1.98
  -7   0 -14    4.67    1.31
  -7   0 -14    3.04    2.69
  -7   0 -14    4.18    1.56
   7  -1 -14    0.44    1.27
   7  -1 -14    0.98    1.93
   7   1  14   -0.08    0.44
  -7  -1 -14    0.21    0.88
  -7   1  14    1.16    1.21
  -7  -1 -14    0.26    0.78
  -7   1  14    0.38    1.02
   7   2  14    4.25    1.13
   7  -2 -14    5.52    2.70
   7  -2 -14    4.65    1.89
  -7  -2 -14    3.59    1.35
  -7  -2 -14    4.78    1.40
  -7   2  14    4.50    1.69
  -7   2  14    7.33    2.11
   7  -3 -14    3.49    1.68
   7  -3 -14    3.47    2.55
  -7   3  14    7.24    2.10
  -7  -3 -14    1.06    0.98
  -7   3  14    8.00    2.26
   7  -4 -14    4.15    1.99
   7  -4 -14    6.53    2.96
  -7  -4 -14    8.41    1.77
  -7   4  14    3.65    1.54
  -7   4  14    4.43    1.76
   7  -5 -14    1.48    2.12
   8   4 -14    0.05    2.27
  -8  -4  14    1.38    1.47
   8   3 -14    3.21    1.82
   8   3 -14    2.75    2.50
  -8  -3  14    3.73    1.77
  -8   3 -14    1.42    1.58
   8   2 -14   -1.04    1.73
   8   2 -14    1.33    1.47
  -8   2 -14    3.10    1.77
  -8  -2  14    0.87    1.27
   8   1 -14   17.16    3.48
   8   1 -14   15.15    4.60
  -8  -1  14   16.67    3.34
  -8  -1  14   15.33    3.09
   8   0 -14   11.64    2.87
   8   0 -14   12.26    4.05
  -8   0  14   10.72    2.55
  -8   0  14   11.87    2.96
   8  -1 -14   15.65    3.20
   8  -1 -14   21.77    5.29
  -8   1  14   15.65    2.89
  -8   1  14   14.91    3.13
   8  -2 -14    1.20    2.00
   8  -2 -14    0.92    1.40
  -8  -2 -14    4.55    1.60
  -8   2  14   -0.09    1.12
  -8   2  14    0.25    0.98
   8  -3 -14    1.61    1.68
   8  -3 -14    0.43    2.19
  -8  -3 -14    1.11    1.04
  -8   3  14    1.95    1.62
  -8   3  14    2.60    1.59
   8  -4 -14    0.92    2.20
  -8   4  14    2.11    1.62
   9   3 -14    8.56    3.74
  -9  -3  14    7.16    2.31
   9   2 -14    1.26    2.39
  -9  -2  14    0.41    1.29
   9   1 -14   -0.04    1.51
   9   1 -14   -2.06    1.77
  -9  -1  14   -0.97    1.06
   9   0 -14    2.39    1.79
   9   0 -14    2.58    2.56
  -9   0  14    1.81    1.53
  -9   0 -14    0.01    1.12
   9  -1 -14   -0.22    1.31
   9  -1 -14    2.05    2.37
  -9   1  14    0.95    1.35
  -9   1  14    1.33    1.50
   9  -2 -14    0.65    1.71
   9  -2 -14   -0.86    1.72
  -9   2  14    0.46    1.30
  -9   2  14   -0.30    1.17
   9  -3 -14   10.41    3.83
  -9   3  14    7.67    2.41
  10   1 -14    0.43    2.49
 -10  -1  14   -0.17    1.14
  10   0 -14   -0.99    2.18
 -10   0  14    2.01    1.56
  10  -1 -14    0.45    2.54
 -10   1  14    0.73    1.44
 -10   2  14   10.50    2.84
   0  -6  15    1.98    1.10
   0   6 -15    0.97    1.10
   0   6 -15    0.70    1.58
   0   5 -15   13.95    3.63
   0   5 -15   15.59    4.17
   0   5 -15   11.63    2.56
   0  -5  15   14.49    2.21
   0   4 -15    0.08    0.79
   0  -4  15    0.47    0.88
   0   4 -15    0.48    1.40
   0   4 -15   -0.16    1.12
   0   3 -15    3.71    1.82
   0   3 -15    2.99    1.25
   0   3 -15    2.29    1.78
   0  -3  15    1.91    1.02
   0   2 -15   19.45    2.98
   0   2 -15   17.53    2.39
   0  -2  15   16.71    2.11
   0   1 -15   11.49    2.38
   0  -1  15   11.76    1.58
   0   1 -15   10.75    2.10
   0   0 -15    0.14    0.63
   0   0  15    0.08    0.34
   0   0 -15    0.55    0.76
   0  -1 -15   11.73    2.06
   0   1  15   10.51    1.11
   0   1  15   12.11    1.19
   0  -1 -15   11.75    1.58
   0  -2 -15   16.60    2.21
   0  -3 -15    3.46    1.19
   0  -4 -15    0.00    0.61
   1   6 -15    1.19    1.88
   1   6 -15    1.30    1.18
   1   6 -15    0.43    1.38
   1   6 -15    1.56    1.95
   1  -6  15    0.48    0.86
  -1   6 -15    0.00    0.97
  -1  -6  15    0.00    0.67
  -1   6 -15    0.63    1.63
   1   5 -15    5.50    1.99
   1   5 -15    6.42    2.54
   1   5 -15    8.69    3.02
   1   5 -15    7.54    2.01
   1  -5  15    3.37    1.18
  -1  -5  15    6.92    1.61
  -1   5 -15    3.35    2.47
  -1   5 -15    3.35    2.10
  -1   5 -15    5.43    1.83
   1  -4  15   14.40    2.63
  -1   4 -15   14.55    3.37
  -1   4 -15   13.86    3.76
  -1   4 -15   13.11    2.59
   1   3 -15    2.57    1.63
   1   3 -15    1.14    0.91
   1  -3  15    1.33    0.96
  -1   3 -15    0.26    1.41
  -1  -3  15    1.58    0.99
  -1   3 -15    0.74    0.93
  -1   3 -15   -0.35    0.90
   1   2 -15   19.75    3.07
   1   2 -15   16.78    2.35
   1  -2  15   18.67    2.18
  -1   2 -15   19.70    3.42
  -1  -2  15   18.00    2.29
  -1   2 -15   20.54    2.59
   1   1 -15   16.94    2.25
   1   1 -15   17.95    3.21
   1   0 -15   -0.24    0.76
   1   0 -15   -0.35    0.52
   1   0  15    0.22    0.35
  -1   0  15    0.01    0.34
  -1   0 -15    0.16    0.67
  -1   0 -15   -0.42    0.58
   1  -1 -15   14.80    2.02
   1  -2 -15   18.10    2.29
  -1   2  15   17.79    1.28
  -1  -2 -15   18.14    2.35
  -1   2  15   18.33    1.43
   1  -3 -15    0.97    0.76
  -1  -3 -15    0.56    0.76
  -1  -4 -15   13.05    2.29
   2   6 -15    2.32    1.70
   2   6 -15    1.94    1.92
   2   6 -15    3.72    1.63
   2   6 -15    2.19    2.47
   2  -6  15    7.09    1.79
  -2  -6  15    2.07    1.50
  -2  -6  15    2.29    1.09
  -2   6 -15    7.71    2.89
   2   5 -15    6.51    1.88
   2   5 -15    5.65    2.63
   2   5 -15    5.30    2.63
   2   5 -15    2.34    1.48
  -2  -5  15    4.16    1.25
  -2   5 -15    0.28    1.61
  -2  -5  15    7.23    1.93
   2   4 -15   -0.57    1.06
   2   4 -15    0.46    1.47
   2  -4  15    6.90    1.82
   2   4 -15    0.04    1.34
  -2   4 -15    8.80    2.11
  -2  -4  15    0.62    0.91
  -2   4 -15    7.39    3.14
  -2   4 -15   10.52    2.79
   2   3 -15   10.81    2.15
   2   3 -15   13.59    2.48
   2   3 -15   12.25    3.18
  -2  -3  15    9.96    2.23
   2   1 -15    4.83    1.40
   2   1 -15    2.28    1.43
   2  -1  15    1.69    0.73
  -2   1 -15    2.14    1.08
  -2   1 -15    2.09    1.16
  -2  -1  15    3.70    1.15
   2   0 -15    0.01    0.84
   2   0 -15   -0.56    0.50
   2   0  15    0.11    0.36
  -2   0  15   -0.29    0.38
  -2   0 -15   -0.25    0.60
  -2   0 -15   -0.01    0.71
   2   1  15    1.55    0.48
   2  -1 -15    2.59    1.04
   2  -1 -15    4.42    1.46
  -2   1  15    4.02    0.97
  -2  -1 -15    2.59    1.09
  -2  -1 -15    2.46    0.88
   2  -3 -15   11.80    2.14
  -2   3  15   10.66    0.95
  -2   3  15   11.88    1.31
  -2  -4 -15    8.87    1.91
  -2   5  15    5.05    1.09
   3  -6  15    8.80    1.96
   3   6 -15    2.05    2.20
   3   6 -15    2.78    1.46
  -3   6 -15   10.28    3.33
  -3  -6  15    2.14    1.52
  -3  -6  15    2.71    1.26
   3   5 -15    5.20    1.73
   3   5 -15    6.30    2.81
   3   5 -15    5.13    2.63
   3  -5  15    1.36    1.00
   3   5 -15    3.16    1.81
  -3  -5  15    5.41    1.77
  -3  -5  15    5.49    1.38
  -3   5 -15    1.53    2.20
  -3   5 -15    3.03    1.90
   3  -4  15   12.95    2.37
   3   4 -15    3.14    2.26
  -3   4 -15   14.20    4.05
  -3   4 -15   17.36    3.67
   3   3 -15    7.48    2.69
   3   3 -15    7.15    1.72
   3   3 -15    7.95    2.05
  -3  -3  15    6.30    1.86
  -3  -3  15    6.48    1.69
   3   2 -15    0.30    0.69
   3  -2  15    2.65    1.03
   3   2 -15   -0.12    1.18
   3   2 -15    0.05    0.85
  -3   2 -15    1.51    1.76
  -3  -2  15    0.12    0.70
  -3   2 -15    3.06    1.27
  -3  -2  15    1.69    1.02
  -3   2 -15    2.10    1.37
   3   1 -15   12.77    2.22
   3   1 -15   13.22    3.13
   3   1 -15   11.93    2.25
  -3  -1  15   11.78    2.15
   3   0 -15   -0.61    0.49
   3   0 -15    0.05    1.00
   3   0  15    0.13    0.37
  -3   0 -15   -0.03    0.66
  -3   0  15   -0.20    0.52
  -3   0 -15   -0.22    0.64
   3   1  15    5.14    0.91
  -3  -1 -15    3.99    1.08
  -3  -1 -15    5.42    1.45
   3  -2 -15    0.09    0.66
   3  -2 -15    0.62    1.01
  -3   2  15   -0.01    0.47
  -3  -2 -15    1.67    0.98
   3  -3 -15    6.99    1.69
  -3   3  15    7.54    1.43
  -3   5  15    7.56    1.49
   4   6 -15    2.98    2.51
  -4  -6  15    2.91    1.71
  -4  -6  15    4.18    1.39
   4   5 -15    1.12    1.49
   4   5 -15    1.42    1.93
   4  -5  15    4.57    1.42
   4   5 -15    2.32    2.23
   4   5 -15    1.09    1.12
  -4   5 -15    4.70    2.10
  -4   5 -15    3.52    1.53
  -4  -5  15    1.82    0.99
  -4  -5  15    1.39    1.31
   4   4 -15    0.06    0.73
   4   4 -15   -0.41    1.08
   4   4 -15    0.02    1.53
  -4   4 -15    0.00    0.78
  -4  -4  15    0.02    1.00
  -4   4 -15    0.79    1.27
  -4   4 -15    0.17    1.76
   4  -3  15    1.30    0.86
   4   3 -15    0.50    1.52
   4   3 -15    0.58    0.80
   4   3 -15   -0.52    0.97
  -4   3 -15    1.36    1.98
  -4   3 -15    1.08    1.10
  -4   3 -15    2.34    1.52
  -4  -3  15    0.27    0.92
  -4  -3  15   -0.14    0.83
   4   2 -15    9.88    2.99
   4   2 -15    8.14    1.76
   4   2 -15    8.25    2.06
  -4  -2  15    9.12    2.03
  -4   2 -15    2.48    2.10
  -4  -2  15    9.02    2.13
   4   1 -15   35.80    3.16
   4   1 -15   32.34    3.35
   4   1 -15   31.68    4.34
   4  -1  15   21.41    2.35
  -4   1 -15   22.72    3.08
  -4  -1  15   30.65    3.23
  -4  -1  15   31.66    3.02
  -4   1 -15   23.46    2.88
   4   0 -15   -0.45    1.05
   4   0 -15    0.09    0.57
   4   0  15    0.14    0.40
   4   0 -15    0.49    1.04
  -4   0 -15   -0.52    0.54
  -4   0 -15   -0.47    0.60
  -4   0  15   -0.05    0.60
   4   1  15   21.66    1.88
   4  -1 -15   32.64    4.03
   4  -1 -15   31.13    3.22
  -4  -1 -15   18.35    2.42
  -4  -1 -15   19.03    2.26
[truncated: 22,594 more chars]
