# Supplementary material for: Incorporating the Thiazolo[5,4-d]thiazole Unit into a Coordination Polymer with Interdigitated Structure
Source: Preprints.org preprint supplement (doi:10.20944/preprints201712.0162.v1), 2017-12-22
Supplement: Supplementary file 2 [file supplementary › Zn-BpTzTz-Isopht-fin.cif]

 
data_Zn-BpTzTz-Isopht
 
_audit_creation_method            'SHELXL-2014/7'
_shelx_SHELXL_version_number      '2014/7'
_chemical_name_systematic         ?
_chemical_name_common             ?
_chemical_melting_point           ?
_chemical_formula_moiety          
'C22 H12 N4 O4 S2 Zn, C3 H7 N O'
_chemical_formula_sum
 'C25 H19 N5 O5 S2 Zn' 
_chemical_formula_weight          598.94

loop_
 _atom_type_symbol
 _atom_type_description
 _atom_type_scat_dispersion_real
 _atom_type_scat_dispersion_imag
 _atom_type_scat_source
 'C'  'C'   0.0033   0.0016
 'International Tables Vol C Tables 4.2.6.8 and 6.1.1.4'
 'H'  'H'   0.0000   0.0000
 'International Tables Vol C Tables 4.2.6.8 and 6.1.1.4'
 'N'  'N'   0.0061   0.0033
 'International Tables Vol C Tables 4.2.6.8 and 6.1.1.4'
 'O'  'O'   0.0106   0.0060
 'International Tables Vol C Tables 4.2.6.8 and 6.1.1.4'
 'S'  'S'   0.1246   0.1234
 'International Tables Vol C Tables 4.2.6.8 and 6.1.1.4'
 'Zn'  'Zn'   0.2839   1.4301
 'International Tables Vol C Tables 4.2.6.8 and 6.1.1.4'
 
_space_group_crystal_system       triclinic
_space_group_IT_number            2
_space_group_name_H-M_alt         'P -1'
_space_group_name_Hall            '-P 1'
 
_shelx_space_group_comment
;
The symmetry employed for this shelxl refinement is uniquely defined
by the following loop, which should always be used as a source of
symmetry information in preference to the above space-group names.
They are only intended as comments.
;
 
loop_
 _space_group_symop_operation_xyz
 'x, y, z'
 '-x, -y, -z'
 
_cell_length_a                    9.1388(6)
_cell_length_b                    10.0354(7)
_cell_length_c                    14.2804(11)
_cell_angle_alpha                 88.417(4)
_cell_angle_beta                  88.236(5)
_cell_angle_gamma                 75.636(4)
_cell_volume                      1267.86(16)
_cell_formula_units_Z             2
_cell_measurement_temperature     100(2)
_cell_measurement_reflns_used     4515
_cell_measurement_theta_min       2.678
_cell_measurement_theta_max       28.048
 
_exptl_crystal_description        block
_exptl_crystal_colour             colorless
_exptl_crystal_density_meas       ?
_exptl_crystal_density_method     ?
_exptl_crystal_density_diffrn     1.569          
_exptl_crystal_F_000              612
_exptl_transmission_factor_min    ?
_exptl_transmission_factor_max    ?
_exptl_crystal_size_max           0.100
_exptl_crystal_size_mid           0.050
_exptl_crystal_size_min           0.010
_exptl_absorpt_coefficient_mu     1.181
_shelx_estimated_absorpt_T_min    0.891
_shelx_estimated_absorpt_T_max    0.988
_exptl_absorpt_correction_type    multi-scan
_exptl_absorpt_correction_T_min   0.6951
_exptl_absorpt_correction_T_max   0.7460
_exptl_absorpt_process_details    '(<i>SADABS</i>; Sheldrick, 2012)' 
_exptl_absorpt_special_details    ?
_diffrn_ambient_temperature       100(2)
_diffrn_radiation_wavelength      0.71073
_diffrn_radiation_type            MoK\a
_diffrn_radiation_source          'microfocus sealed tube'
_diffrn_radiation_monochromator   'multilayer mirror'
_diffrn_measurement_device_type   'Bruker Kappa APEX-II CCD area detector'
_diffrn_measurement_method        '\w scans'
_diffrn_detector_area_resol_mean  ?
_diffrn_reflns_number             17151
_diffrn_reflns_av_unetI/netI      0.0565
_diffrn_reflns_av_R_equivalents   0.0445
_diffrn_reflns_limit_h_min        -10
_diffrn_reflns_limit_h_max        11
_diffrn_reflns_limit_k_min        -12
_diffrn_reflns_limit_k_max        12
_diffrn_reflns_limit_l_min        -14
_diffrn_reflns_limit_l_max        17
_diffrn_reflns_theta_min          2.095
_diffrn_reflns_theta_max          25.799
_diffrn_reflns_theta_full         25.242
_diffrn_measured_fraction_theta_max   0.970
_diffrn_measured_fraction_theta_full  0.970
_diffrn_reflns_Laue_measured_fraction_max    0.970
_diffrn_reflns_Laue_measured_fraction_full   0.970
_diffrn_reflns_point_group_measured_fraction_max   0.970
_diffrn_reflns_point_group_measured_fraction_full  0.970
_reflns_number_total              4743
_reflns_number_gt                 3696
_reflns_threshold_expression      'I > 2\s(I)'
_reflns_Friedel_coverage          0.000
_reflns_Friedel_fraction_max      .
_reflns_Friedel_fraction_full     .
 
_reflns_special_details
;
 Reflections were merged by SHELXL according to the crystal
 class for the calculation of statistics and refinement.
 
 _reflns_Friedel_fraction is defined as the number of unique
 Friedel pairs measured divided by the number that would be
 possible theoretically, ignoring centric projections and
 systematic absences.
;
 
_computing_data_collection        'APEX2 (Bruker, 2014)'
_computing_cell_refinement        'SAINT (Bruker, 2014)'
_computing_data_reduction         'SAINT (Bruker, 2014)'
_computing_structure_solution     'SHELXT-2015 (Sheldrick 2015a)'
_computing_structure_refinement 'SHELXL-2014/7 (Sheldrick, 2015b)'
_computing_molecular_graphics     'DIAMOND 4.4 (Brandenburg, 2015)'
_computing_publication_material   ?

_publ_section_references
;
Bruker AXS. (2014). APEX2. Bruker AXS Inc., Madison, Wisconsin, USA.
Bruker AXS. (2014). SAINT. Bruker AXS Inc., Madison, Wisconsin, USA.
Bruker AXS. (2014). SADABS. Bruker AXS Inc., Madison, Wisconsin, USA.
Brandenburg, K. (2015) DIAMOND 4.4. Crystal Impact GbR, Bonn, Germany.
Sheldrick, G. M. (1996). <i>SADABS</i>. University of G\"ottingen, Germany.
Sheldrick, G. M. (2008). Acta Cryst. A64, 112-122. 
Sheldrick, G. M. (2015a). Acta Cryst. A71, 3-8.
Sheldrick, G. M. (2015b). Acta Cryst. C71, 3-8.
;

_publ_section_exptl_refinement
;
The hydrogen atoms for aromatic CH and for
the amide group in DMF were positioned geometrically
(C---H = 0.95 \%A) and refined using a riding model
(AFIX 43) with U~iso~(H) = 1.2U~eq~(C).

The hydrogen atoms for CH3 were positioned 
geometrically
(C---H = 0.98 \%A) and refined using a riding model
(AFIX 137) with U~iso~(H) = 1.5U~eq~(C). 

The thiazolothiazol moiety was refined with a disorder
model corresponding to a ring flip, which exchanges
the S and N orientation, using PART n commands.
The occupation factors of the S and N atoms were
refined to about 0.904 for the A atoms and 0.096 for 
the B atoms. Thus, the disorder is relatively minor 
with only about 9.6%
of the S and N atoms in the flipped position.
The major atom positions are designated as "A", the 
minor ones as "B". The minor positions could only
be refined isotropically.

The DMF crystal solvent molecule contained disorder
in the two methyl groups, with two positions for
each methyl group. This disorder does not give
a perfect oriented Me2N group but we decided to 
keep the slightly disordered DMF molecule instead
of removing its contribution with SQUEEZE.
Each methyl group disorder was refined independently
concerning the occupation factors. 
;

_refine_special_details
;
 Refinement of F^2^ against ALL reflections. The weighted R-factor wR and
 goodness of fit S are based on F^2^, conventional R-factors R are based
 on F, with F set to zero for negative F^2^. The threshold expression of
 F^2^ > 2sigma(F^2^) is used only for calculating R-factors(gt) etc. and is
 not relevant to the choice of reflections for refinement.  R-factors based
 on F^2^ are statistically about twice as large as those based on F, and R-
 factors based on ALL data will be even larger.
;

_refine_ls_structure_factor_coef  Fsqd
_refine_ls_matrix_type            full
_refine_ls_weighting_scheme       calc
_refine_ls_weighting_details
'w=1/[\s^2^(Fo^2^)+(0.0401P)^2^+0.7259P] where P=(Fo^2^+2Fc^2^)/3'
_atom_sites_solution_primary      ?
_atom_sites_solution_secondary    ?
_atom_sites_solution_hydrogens    geom
_refine_ls_hydrogen_treatment     constr
_refine_ls_extinction_method      none
_refine_ls_extinction_coef        .
_refine_ls_number_reflns          4743
_refine_ls_number_parameters      364
_refine_ls_number_restraints      0
_refine_ls_R_factor_all           0.0609
_refine_ls_R_factor_gt            0.0400
_refine_ls_wR_factor_ref          0.0916
_refine_ls_wR_factor_gt           0.0849
_refine_ls_goodness_of_fit_ref    1.055
_refine_ls_restrained_S_all       1.055
_refine_ls_shift/su_max           0.001
_refine_ls_shift/su_mean          0.000
 
loop_
 _atom_site_label
 _atom_site_type_symbol
 _atom_site_fract_x
 _atom_site_fract_y
 _atom_site_fract_z
 _atom_site_U_iso_or_equiv
 _atom_site_adp_type
 _atom_site_occupancy
 _atom_site_site_symmetry_order  
 _atom_site_calc_flag
 _atom_site_refinement_flags_posn
 _atom_site_refinement_flags_adp
 _atom_site_refinement_flags_occupancy
 _atom_site_disorder_assembly
 _atom_site_disorder_group
Zn Zn 1.14425(4) 0.12161(3) 0.46811(2) 0.01026(11) Uani 1 1 d . . . . .
S1A S 0.80684(10) -0.02035(11) 0.02459(6) 0.0168(3) Uani 0.904(3) 1 d . . P A 1
N2A N 0.6481(4) 0.2224(4) 0.0740(2) 0.0196(7) Uani 0.904(3) 1 d . . P A 1
S2A S 0.44080(12) 0.26863(14) -0.07460(8) 0.0208(3) Uani 0.904(3) 1 d . . P A 1
N3A N 0.5999(4) 0.0257(4) -0.1221(2) 0.0153(8) Uani 0.904(3) 1 d . . P A 1
S1B S 0.6000(14) 0.2826(13) 0.0765(9) 0.031(3) Uiso 0.096(3) 1 d . . P A 2
N2B N 0.774(4) 0.051(4) 0.047(3) 0.023(7) Uiso 0.096(3) 1 d . . P A 2
S2B S 0.6408(14) -0.0184(13) -0.1201(10) 0.022(3) Uiso 0.096(3) 1 d . . P A 2
N3B N 0.454(4) 0.218(3) -0.089(2) 0.011(9) Uiso 0.096(3) 1 d . . P A 2
O1 O 0.9415(2) 0.15563(19) 0.54078(15) 0.0155(5) Uani 1 1 d . . . . .
O2 O 0.7366(2) 0.07382(18) 0.55425(14) 0.0123(5) Uani 1 1 d . . . . .
O3 O 0.8817(2) 0.65887(19) 0.54038(15) 0.0168(5) Uani 1 1 d . . . . .
O4 O 0.6704(2) 0.79353(19) 0.59381(15) 0.0176(5) Uani 1 1 d . . . . .
N1 N 1.0268(3) 0.1303(2) 0.33775(17) 0.0136(6) Uani 1 1 d . . . . .
N4 N 0.2455(3) 0.1124(2) -0.39710(17) 0.0122(5) Uani 1 1 d . . . . .
C1 C 0.7096(3) 0.3107(3) 0.5787(2) 0.0142(7) Uani 1 1 d . . . . .
C2 C 0.5587(3) 0.3291(3) 0.6079(2) 0.0186(7) Uani 1 1 d . . . . .
H2 H 0.5147 0.2527 0.6122 0.022 Uiso 1 1 calc R U . . .
C3 C 0.4733(3) 0.4596(3) 0.6305(2) 0.0222(8) Uani 1 1 d . . . . .
H3 H 0.3719 0.4719 0.6528 0.027 Uiso 1 1 calc R U . . .
C4 C 0.5358(3) 0.5720(3) 0.6207(2) 0.0202(8) Uani 1 1 d . . . . .
H4 H 0.4767 0.6614 0.6353 0.024 Uiso 1 1 calc R U . . .
C5 C 0.6846(3) 0.5538(3) 0.5897(2) 0.0141(7) Uani 1 1 d . . . . .
C6 C 0.7717(3) 0.4236(3) 0.5693(2) 0.0130(7) Uani 1 1 d . . . . .
H6 H 0.8740 0.4115 0.5489 0.016 Uiso 1 1 calc R U . . .
C7 C 0.8020(3) 0.1720(3) 0.55547(19) 0.0094(6) Uani 1 1 d . . . . .
C8 C 0.7501(3) 0.6768(3) 0.5742(2) 0.0140(7) Uani 1 1 d . . . . .
C9 C 1.0687(3) 0.0326(3) 0.2735(2) 0.0155(7) Uani 1 1 d . . . . .
H9 H 1.1601 -0.0357 0.2824 0.019 Uiso 1 1 calc R U . . .
C10 C 0.9873(3) 0.0255(3) 0.1957(2) 0.0177(7) Uani 1 1 d . . . . .
H10 H 1.0210 -0.0475 0.1531 0.021 Uiso 1 1 calc R U . . .
C11 C 0.8547(3) 0.1261(3) 0.1797(2) 0.0159(7) Uani 1 1 d . . . . .
C12 C 0.8116(3) 0.2300(3) 0.2453(2) 0.0192(7) Uani 1 1 d . . . . .
H12 H 0.7226 0.3016 0.2369 0.023 Uiso 1 1 calc R U . . .
C13 C 0.8983(3) 0.2280(3) 0.3220(2) 0.0191(7) Uani 1 1 d . . . . .
H13 H 0.8666 0.2988 0.3664 0.023 Uiso 1 1 calc R U . . .
C14 C 0.7635(3) 0.1244(3) 0.0985(2) 0.0184(7) Uani 1 1 d . . . . .
C15 C 0.6577(3) 0.0626(3) -0.0421(2) 0.0182(7) Uani 1 1 d . . . . .
C16 C 0.5876(4) 0.1875(3) -0.0066(2) 0.0203(7) Uani 1 1 d . . . . .
C17 C 0.4837(3) 0.1243(3) -0.1476(2) 0.0154(7) Uani 1 1 d . . . . .
C18 C 0.1898(3) 0.2058(3) -0.3315(2) 0.0179(7) Uani 1 1 d . . . . .
H18 H 0.0964 0.2704 -0.3428 0.022 Uiso 1 1 calc R U . . .
C19 C 0.2599(3) 0.2131(3) -0.2491(2) 0.0194(7) Uani 1 1 d . . . . .
H19 H 0.2154 0.2813 -0.2048 0.023 Uiso 1 1 calc R U . . .
C20 C 0.3981(3) 0.1191(3) -0.2305(2) 0.0142(7) Uani 1 1 d . . . . .
C21 C 0.4538(3) 0.0197(3) -0.2973(2) 0.0133(7) Uani 1 1 d . . . . .
H21 H 0.5449 -0.0485 -0.2870 0.016 Uiso 1 1 calc R U . . .
C22 C 0.3761(3) 0.0208(3) -0.3783(2) 0.0132(7) Uani 1 1 d . . . . .
H22 H 0.4170 -0.0470 -0.4234 0.016 Uiso 1 1 calc R U . . .
N5 N 0.1630(5) 0.4753(4) 0.1424(4) 0.0809(17) Uani 1 1 d . . . . .
O5 O 0.0922(6) 0.7057(4) 0.1182(4) 0.127(2) Uani 1 1 d . . . . .
C23 C 0.1819(7) 0.5966(5) 0.1385(4) 0.086(2) Uani 1 1 d . . . . .
H23 H 0.2801 0.6040 0.1536 0.103 Uiso 1 1 calc R U . . .
C24A C 0.304(2) 0.3565(13) 0.1661(11) 0.074(5) Uiso 0.45(3) 1 d . . P B 3
H24A H 0.3955 0.3911 0.1604 0.111 Uiso 0.45(3) 1 calc R U P B 3
H24B H 0.3123 0.2813 0.1224 0.111 Uiso 0.45(3) 1 calc R U P B 3
H24C H 0.2935 0.3226 0.2303 0.111 Uiso 0.45(3) 1 calc R U P B 3
C25A C 0.0425(17) 0.4511(15) 0.1916(13) 0.081(6) Uiso 0.372(14) 1 d . . P B 3
H25A H 0.0291 0.5016 0.2503 0.121 Uiso 0.372(14) 1 calc R U P B 3
H25B H 0.0600 0.3524 0.2056 0.121 Uiso 0.372(14) 1 calc R U P B 3
H25C H -0.0485 0.4819 0.1544 0.121 Uiso 0.372(14) 1 calc R U P B 3
C24B C 0.2286(16) 0.3438(9) 0.1677(7) 0.051(3) Uiso 0.55(3) 1 d . . P B 4
H24D H 0.2241 0.2831 0.1158 0.076 Uiso 0.55(3) 1 calc R U P B 4
H24E H 0.1750 0.3171 0.2228 0.076 Uiso 0.55(3) 1 calc R U P B 4
H24F H 0.3344 0.3358 0.1827 0.076 Uiso 0.55(3) 1 calc R U P B 4
C25B C 0.0008(18) 0.4717(15) 0.0952(14) 0.170(7) Uiso 0.628(14) 1 d . . P B 4
H25D H -0.0782 0.4822 0.1443 0.254 Uiso 0.628(14) 1 calc R U P B 4
H25E H 0.0117 0.3837 0.0643 0.254 Uiso 0.628(14) 1 calc R U P B 4
H25F H -0.0270 0.5471 0.0489 0.254 Uiso 0.628(14) 1 calc R U P B 4
 
loop_
 _atom_site_aniso_label
 _atom_site_aniso_U_11
 _atom_site_aniso_U_22
 _atom_site_aniso_U_33
 _atom_site_aniso_U_23
 _atom_site_aniso_U_13
 _atom_site_aniso_U_12
Zn 0.01073(18) 0.00945(17) 0.0109(2) -0.00063(13) -0.00091(14) -0.00303(12)
S1A 0.0159(5) 0.0218(6) 0.0125(5) -0.0025(4) -0.0047(4) -0.0036(4)
N2A 0.0219(18) 0.0207(18) 0.0164(18) -0.0025(14) -0.0077(15) -0.0046(16)
S2A 0.0224(5) 0.0209(6) 0.0173(6) -0.0063(5) -0.0092(4) -0.0003(5)
N3A 0.0151(19) 0.018(2) 0.0128(18) -0.0018(15) -0.0041(15) -0.0031(17)
O1 0.0119(10) 0.0156(10) 0.0187(12) 0.0000(9) 0.0018(9) -0.0031(8)
O2 0.0134(10) 0.0095(10) 0.0150(12) -0.0006(8) -0.0036(9) -0.0046(8)
O3 0.0158(11) 0.0155(10) 0.0209(13) -0.0012(9) 0.0027(10) -0.0078(8)
O4 0.0206(11) 0.0092(10) 0.0231(13) -0.0031(9) 0.0025(10) -0.0040(8)
N1 0.0142(13) 0.0158(12) 0.0118(14) -0.0009(10) -0.0016(11) -0.0054(10)
N4 0.0116(12) 0.0143(12) 0.0112(14) 0.0002(10) -0.0016(11) -0.0039(10)
C1 0.0153(15) 0.0133(14) 0.0147(17) -0.0010(12) -0.0004(13) -0.0045(12)
C2 0.0193(16) 0.0122(15) 0.0259(19) -0.0001(13) 0.0048(15) -0.0074(12)
C3 0.0143(16) 0.0199(16) 0.031(2) -0.0029(14) 0.0084(15) -0.0032(13)
C4 0.0190(16) 0.0149(15) 0.026(2) -0.0020(13) 0.0058(15) -0.0040(13)
C5 0.0159(15) 0.0124(14) 0.0147(17) -0.0016(12) -0.0015(13) -0.0044(12)
C6 0.0127(14) 0.0142(14) 0.0126(16) -0.0020(12) 0.0018(13) -0.0045(11)
C7 0.0120(14) 0.0131(14) 0.0032(15) 0.0024(11) -0.0030(12) -0.0031(11)
C8 0.0146(15) 0.0167(15) 0.0106(16) -0.0008(12) -0.0056(13) -0.0030(12)
C9 0.0160(15) 0.0169(15) 0.0139(17) 0.0000(13) -0.0011(14) -0.0047(12)
C10 0.0234(17) 0.0201(16) 0.0105(17) -0.0015(13) 0.0010(14) -0.0071(13)
C11 0.0151(15) 0.0247(16) 0.0105(17) 0.0016(13) -0.0013(14) -0.0100(13)
C12 0.0131(15) 0.0255(17) 0.0166(18) 0.0010(14) -0.0054(14) 0.0000(13)
C13 0.0208(16) 0.0178(16) 0.0170(18) -0.0030(13) -0.0022(15) -0.0010(13)
C14 0.0181(16) 0.0258(17) 0.0129(18) -0.0026(15) 0.0008(14) -0.0083(14)
C15 0.0159(15) 0.0247(16) 0.0145(18) 0.0006(13) 0.0005(14) -0.0059(13)
C16 0.0200(16) 0.0242(17) 0.0173(19) -0.0029(14) 0.0000(15) -0.0065(13)
C17 0.0143(15) 0.0214(16) 0.0108(17) -0.0013(13) 0.0016(13) -0.0050(13)
C18 0.0153(15) 0.0207(16) 0.0157(18) -0.0028(13) -0.0022(14) -0.0002(13)
C19 0.0193(16) 0.0238(17) 0.0135(18) -0.0083(13) 0.0000(15) -0.0017(13)
C20 0.0140(15) 0.0198(15) 0.0104(16) -0.0003(12) 0.0000(13) -0.0075(12)
C21 0.0159(15) 0.0129(14) 0.0113(17) 0.0017(12) -0.0019(13) -0.0039(12)
C22 0.0122(14) 0.0135(14) 0.0138(17) -0.0016(12) 0.0007(13) -0.0026(12)
N5 0.090(3) 0.043(2) 0.105(4) -0.013(2) 0.057(3) -0.015(2)
O5 0.161(5) 0.041(2) 0.155(5) -0.011(3) 0.045(4) 0.013(3)
C23 0.095(5) 0.054(3) 0.105(5) 0.001(3) 0.024(4) -0.015(3)
 
_geom_special_details
;
 All esds (except the esd in the dihedral angle between two l.s. planes)
 are estimated using the full covariance matrix.  The cell esds are taken
 into account individually in the estimation of esds in distances, angles
 and torsion angles; correlations between esds in cell parameters are only
 used when they are defined by crystal symmetry.  An approximate (isotropic)
 treatment of cell esds is used for estimating esds involving l.s. planes.
;
 
loop_
 _geom_bond_atom_site_label_1
 _geom_bond_atom_site_label_2
 _geom_bond_distance
 _geom_bond_site_symmetry_2
 _geom_bond_publ_flag
Zn O2 2.0218(18) 2_756 ?
Zn O1 2.0532(18) . ?
Zn N4 2.151(3) 1_656 ?
Zn O3 2.1569(19) 2_766 ?
Zn N1 2.166(3) . ?
Zn O4 2.2269(19) 2_766 ?
Zn C8 2.501(3) 2_766 ?
S1A C15 1.713(3) . ?
S1A C14 1.776(3) . ?
N2A C14 1.300(5) . ?
N2A C16 1.383(5) . ?
S2A C16 1.703(4) . ?
S2A C17 1.765(3) . ?
N3A C17 1.312(5) . ?
N3A C15 1.369(5) . ?
S1B C16 1.567(13) . ?
S1B C14 1.917(13) . ?
N2B C14 1.04(4) . ?
N2B C15 1.67(4) . ?
S2B C15 1.431(15) . ?
S2B C17 1.803(12) . ?
N3B C17 1.25(4) . ?
N3B C16 1.69(4) . ?
O1 C7 1.256(3) . ?
O2 C7 1.274(3) . ?
O2 Zn 2.0219(18) 2_756 ?
O3 C8 1.255(3) . ?
O3 Zn 2.1569(19) 2_766 ?
O4 C8 1.250(3) . ?
O4 Zn 2.2269(19) 2_766 ?
N1 C9 1.339(4) . ?
N1 C13 1.350(4) . ?
N4 C18 1.340(4) . ?
N4 C22 1.343(4) . ?
N4 Zn 2.151(3) 1_454 ?
C1 C6 1.389(4) . ?
C1 C2 1.397(4) . ?
C1 C7 1.478(4) . ?
C2 C3 1.389(4) . ?
C2 H2 0.9500 . ?
C3 C4 1.387(4) . ?
C3 H3 0.9500 . ?
C4 C5 1.387(4) . ?
C4 H4 0.9500 . ?
C5 C6 1.384(4) . ?
C5 C8 1.508(4) . ?
C6 H6 0.9500 . ?
C8 Zn 2.501(3) 2_766 ?
C9 C10 1.368(5) . ?
C9 H9 0.9500 . ?
C10 C11 1.392(4) . ?
C10 H10 0.9500 . ?
C11 C12 1.397(4) . ?
C11 C14 1.452(5) . ?
C12 C13 1.368(5) . ?
C12 H12 0.9500 . ?
C13 H13 0.9500 . ?
C15 C16 1.362(4) . ?
C17 C20 1.448(5) . ?
C18 C19 1.370(5) . ?
C18 H18 0.9500 . ?
C19 C20 1.404(4) . ?
C19 H19 0.9500 . ?
C20 C21 1.391(4) . ?
C21 C22 1.374(4) . ?
C21 H21 0.9500 . ?
C22 H22 0.9500 . ?
N5 C23 1.271(6) . ?
N5 C24B 1.351(9) . ?
N5 C25A 1.357(14) . ?
N5 C24A 1.563(16) . ?
N5 C25B 1.656(18) . ?
O5 C23 1.227(6) . ?
C23 H23 0.9500 . ?
C24A H24A 0.9800 . ?
C24A H24B 0.9800 . ?
C24A H24C 0.9800 . ?
C25A H25A 0.9800 . ?
C25A H25B 0.9800 . ?
C25A H25C 0.9800 . ?
C24B H24D 0.9800 . ?
C24B H24E 0.9800 . ?
C24B H24F 0.9800 . ?
C25B H25D 0.9800 . ?
C25B H25E 0.9800 . ?
C25B H25F 0.9800 . ?
 
loop_
 _geom_angle_atom_site_label_1
 _geom_angle_atom_site_label_2
 _geom_angle_atom_site_label_3
 _geom_angle
 _geom_angle_site_symmetry_1
 _geom_angle_site_symmetry_3
 _geom_angle_publ_flag
O2 Zn O1 119.30(7) 2_756 . ?
O2 Zn N4 89.34(9) 2_756 1_656 ?
O1 Zn N4 86.00(9) . 1_656 ?
O2 Zn O3 151.83(7) 2_756 2_766 ?
O1 Zn O3 88.78(7) . 2_766 ?
N4 Zn O3 90.56(9) 1_656 2_766 ?
O2 Zn N1 91.99(9) 2_756 . ?
O1 Zn N1 89.84(9) . . ?
N4 Zn N1 175.76(8) 1_656 . ?
O3 Zn N1 90.18(9) 2_766 . ?
O2 Zn O4 91.82(7) 2_756 2_766 ?
O1 Zn O4 148.39(7) . 2_766 ?
N4 Zn O4 89.21(8) 1_656 2_766 ?
O3 Zn O4 60.01(7) 2_766 2_766 ?
N1 Zn O4 94.77(8) . 2_766 ?
O2 Zn C8 121.75(8) 2_756 2_766 ?
O1 Zn C8 118.58(8) . 2_766 ?
N4 Zn C8 88.56(9) 1_656 2_766 ?
O3 Zn C8 30.11(8) 2_766 2_766 ?
N1 Zn C8 94.17(9) . 2_766 ?
O4 Zn C8 29.96(8) 2_766 2_766 ?
C15 S1A C14 87.67(16) . . ?
C14 N2A C16 110.0(3) . . ?
C16 S2A C17 88.35(16) . . ?
C17 N3A C15 109.3(3) . . ?
C16 S1B C14 77.5(6) . . ?
C14 N2B C15 124(3) . . ?
C15 S2B C17 84.3(6) . . ?
C17 N3B C16 110(2) . . ?
C7 O1 Zn 159.0(2) . . ?
C7 O2 Zn 121.00(17) . 2_756 ?
C8 O3 Zn 90.31(16) . 2_766 ?
C8 O4 Zn 87.25(16) . 2_766 ?
C9 N1 C13 116.7(3) . . ?
C9 N1 Zn 122.0(2) . . ?
C13 N1 Zn 120.9(2) . . ?
C18 N4 C22 116.7(3) . . ?
C18 N4 Zn 121.7(2) . 1_454 ?
C22 N4 Zn 121.2(2) . 1_454 ?
C6 C1 C2 119.8(3) . . ?
C6 C1 C7 120.0(2) . . ?
C2 C1 C7 120.2(2) . . ?
C3 C2 C1 119.7(3) . . ?
C3 C2 H2 120.1 . . ?
C1 C2 H2 120.1 . . ?
C4 C3 C2 120.1(3) . . ?
C4 C3 H3 119.9 . . ?
C2 C3 H3 119.9 . . ?
C5 C4 C3 120.0(3) . . ?
C5 C4 H4 120.0 . . ?
C3 C4 H4 120.0 . . ?
C6 C5 C4 120.2(3) . . ?
C6 C5 C8 119.7(2) . . ?
C4 C5 C8 120.0(2) . . ?
C5 C6 C1 120.1(3) . . ?
C5 C6 H6 120.0 . . ?
C1 C6 H6 120.0 . . ?
O1 C7 O2 123.1(2) . . ?
O1 C7 C1 118.7(2) . . ?
O2 C7 C1 118.1(2) . . ?
O4 C8 O3 122.2(3) . . ?
O4 C8 C5 118.9(2) . . ?
O3 C8 C5 118.9(2) . . ?
O4 C8 Zn 62.80(14) . 2_766 ?
O3 C8 Zn 59.59(14) . 2_766 ?
C5 C8 Zn 174.5(2) . 2_766 ?
N1 C9 C10 123.8(3) . . ?
N1 C9 H9 118.1 . . ?
C10 C9 H9 118.1 . . ?
C9 C10 C11 119.4(3) . . ?
C9 C10 H10 120.3 . . ?
C11 C10 H10 120.3 . . ?
C10 C11 C12 117.3(3) . . ?
C10 C11 C14 122.1(3) . . ?
C12 C11 C14 120.7(3) . . ?
C13 C12 C11 119.5(3) . . ?
C13 C12 H12 120.3 . . ?
C11 C12 H12 120.3 . . ?
N1 C13 C12 123.3(3) . . ?
N1 C13 H13 118.3 . . ?
C12 C13 H13 118.3 . . ?
N2B C14 C11 130.0(19) . . ?
N2A C14 C11 125.1(3) . . ?
N2A C14 S1A 115.2(3) . . ?
C11 C14 S1A 119.7(2) . . ?
N2B C14 S1B 112.7(19) . . ?
C11 C14 S1B 117.2(5) . . ?
C16 C15 N3A 116.8(3) . . ?
C16 C15 S2B 137.4(6) . . ?
C16 C15 N2B 85.0(15) . . ?
S2B C15 N2B 137.6(15) . . ?
C16 C15 S1A 111.4(3) . . ?
N3A C15 S1A 131.8(3) . . ?
C15 C16 N2A 115.7(3) . . ?
C15 C16 S1B 140.3(6) . . ?
C15 C16 N3B 92.8(12) . . ?
S1B C16 N3B 126.9(12) . . ?
C15 C16 S2A 110.6(3) . . ?
N2A C16 S2A 133.7(3) . . ?
N3B C17 C20 125.3(17) . . ?
N3A C17 C20 123.5(3) . . ?
N3A C17 S2A 114.9(3) . . ?
C20 C17 S2A 121.6(2) . . ?
N3B C17 S2B 115.5(17) . . ?
C20 C17 S2B 119.1(5) . . ?
N4 C18 C19 123.7(3) . . ?
N4 C18 H18 118.2 . . ?
C19 C18 H18 118.2 . . ?
C18 C19 C20 119.4(3) . . ?
C18 C19 H19 120.3 . . ?
C20 C19 H19 120.3 . . ?
C21 C20 C19 116.9(3) . . ?
C21 C20 C17 120.1(3) . . ?
C19 C20 C17 123.0(3) . . ?
C22 C21 C20 119.5(3) . . ?
C22 C21 H21 120.2 . . ?
C20 C21 H21 120.2 . . ?
N4 C22 C21 123.7(3) . . ?
N4 C22 H22 118.2 . . ?
C21 C22 H22 118.2 . . ?
C23 N5 C24B 143.7(8) . . ?
C23 N5 C25A 119.1(8) . . ?
C23 N5 C24A 116.8(9) . . ?
C25A N5 C24A 108.0(11) . . ?
C23 N5 C25B 110.5(7) . . ?
C24B N5 C25B 105.8(9) . . ?
O5 C23 N5 129.6(7) . . ?
O5 C23 H23 115.2 . . ?
N5 C23 H23 115.2 . . ?
N5 C24A H24A 109.5 . . ?
N5 C24A H24B 109.5 . . ?
H24A C24A H24B 109.5 . . ?
N5 C24A H24C 109.5 . . ?
H24A C24A H24C 109.5 . . ?
H24B C24A H24C 109.5 . . ?
N5 C25A H25A 109.5 . . ?
N5 C25A H25B 109.5 . . ?
H25A C25A H25B 109.5 . . ?
N5 C25A H25C 109.5 . . ?
H25A C25A H25C 109.5 . . ?
H25B C25A H25C 109.5 . . ?
N5 C24B H24D 109.5 . . ?
N5 C24B H24E 109.5 . . ?
H24D C24B H24E 109.5 . . ?
N5 C24B H24F 109.5 . . ?
H24D C24B H24F 109.5 . . ?
H24E C24B H24F 109.5 . . ?
N5 C25B H25D 109.5 . . ?
N5 C25B H25E 109.5 . . ?
H25D C25B H25E 109.5 . . ?
N5 C25B H25F 109.5 . . ?
H25D C25B H25F 109.5 . . ?
H25E C25B H25F 109.5 . . ?
 
loop_
 _geom_torsion_atom_site_label_1
 _geom_torsion_atom_site_label_2
 _geom_torsion_atom_site_label_3
 _geom_torsion_atom_site_label_4
 _geom_torsion
 _geom_torsion_site_symmetry_1
 _geom_torsion_site_symmetry_2
 _geom_torsion_site_symmetry_3
 _geom_torsion_site_symmetry_4
 _geom_torsion_publ_flag
C6 C1 C2 C3 -2.4(5) . . . . ?
C7 C1 C2 C3 179.3(3) . . . . ?
C1 C2 C3 C4 2.5(5) . . . . ?
C2 C3 C4 C5 -1.0(5) . . . . ?
C3 C4 C5 C6 -0.7(5) . . . . ?
C3 C4 C5 C8 176.8(3) . . . . ?
C4 C5 C6 C1 0.9(5) . . . . ?
C8 C5 C6 C1 -176.6(3) . . . . ?
C2 C1 C6 C5 0.6(5) . . . . ?
C7 C1 C6 C5 179.0(3) . . . . ?
Zn O1 C7 O2 73.4(6) . . . . ?
Zn O1 C7 C1 -109.0(5) . . . . ?
Zn O2 C7 O1 1.9(4) 2_756 . . . ?
Zn O2 C7 C1 -175.81(19) 2_756 . . . ?
C6 C1 C7 O1 10.4(4) . . . . ?
C2 C1 C7 O1 -171.3(3) . . . . ?
C6 C1 C7 O2 -171.8(3) . . . . ?
C2 C1 C7 O2 6.5(4) . . . . ?
Zn O4 C8 O3 4.6(3) 2_766 . . . ?
Zn O4 C8 C5 -174.0(3) 2_766 . . . ?
Zn O3 C8 O4 -4.8(3) 2_766 . . . ?
Zn O3 C8 C5 173.9(3) 2_766 . . . ?
C6 C5 C8 O4 -179.3(3) . . . . ?
C4 C5 C8 O4 3.2(5) . . . . ?
C6 C5 C8 O3 2.0(5) . . . . ?
C4 C5 C8 O3 -175.5(3) . . . . ?
C13 N1 C9 C10 -1.6(4) . . . . ?
Zn N1 C9 C10 171.9(2) . . . . ?
N1 C9 C10 C11 1.6(4) . . . . ?
C9 C10 C11 C12 -0.3(4) . . . . ?
C9 C10 C11 C14 180.0(3) . . . . ?
C10 C11 C12 C13 -0.9(4) . . . . ?
C14 C11 C12 C13 178.9(3) . . . . ?
C9 N1 C13 C12 0.4(4) . . . . ?
Zn N1 C13 C12 -173.2(2) . . . . ?
C11 C12 C13 N1 0.8(5) . . . . ?
C15 N2B C14 C11 179.2(9) . . . . ?
C15 N2B C14 S1B -3(3) . . . . ?
C16 N2A C14 C11 179.8(3) . . . . ?
C16 N2A C14 S1A -0.4(3) . . . . ?
C10 C11 C14 N2B 6(2) . . . . ?
C12 C11 C14 N2B -174(2) . . . . ?
C10 C11 C14 N2A -172.1(3) . . . . ?
C12 C11 C14 N2A 8.1(5) . . . . ?
C10 C11 C14 S1A 8.1(4) . . . . ?
C12 C11 C14 S1A -171.7(2) . . . . ?
C10 C11 C14 S1B -171.6(4) . . . . ?
C12 C11 C14 S1B 8.7(5) . . . . ?
C15 S1A C14 N2A 0.3(2) . . . . ?
C15 S1A C14 C11 -179.9(2) . . . . ?
C17 N3A C15 C16 -0.2(4) . . . . ?
C17 N3A C15 S1A -180.0(2) . . . . ?
C17 S2B C15 C16 0.0(10) . . . . ?
C17 S2B C15 N2B -178.4(14) . . . . ?
C14 N2B C15 C16 2(2) . . . . ?
C14 N2B C15 S2B -178.7(17) . . . . ?
C14 S1A C15 C16 -0.1(2) . . . . ?
C14 S1A C15 N3A 179.7(3) . . . . ?
N3A C15 C16 N2A -179.9(3) . . . . ?
S1A C15 C16 N2A -0.1(3) . . . . ?
S2B C15 C16 S1B -179.2(10) . . . . ?
N2B C15 C16 S1B -0.3(12) . . . . ?
S2B C15 C16 N3B 3.0(13) . . . . ?
N2B C15 C16 N3B -178.1(14) . . . . ?
N3A C15 C16 S2A -0.3(4) . . . . ?
S1A C15 C16 S2A 179.49(15) . . . . ?
C14 N2A C16 C15 0.3(4) . . . . ?
C14 N2A C16 S2A -179.1(3) . . . . ?
C14 S1B C16 C15 -0.8(8) . . . . ?
C14 S1B C16 N3B 176.5(13) . . . . ?
C17 N3B C16 C15 -6(2) . . . . ?
C17 N3B C16 S1B 176.2(12) . . . . ?
C17 S2A C16 C15 0.5(2) . . . . ?
C17 S2A C16 N2A 180.0(3) . . . . ?
C16 N3B C17 C20 -177.0(7) . . . . ?
C16 N3B C17 S2B 7(2) . . . . ?
C15 N3A C17 C20 178.9(3) . . . . ?
C15 N3A C17 S2A 0.6(3) . . . . ?
C16 S2A C17 N3A -0.7(3) . . . . ?
C16 S2A C17 C20 -179.0(2) . . . . ?
C15 S2B C17 N3B -4.5(17) . . . . ?
C15 S2B C17 C20 178.9(3) . . . . ?
C22 N4 C18 C19 1.3(4) . . . . ?
Zn N4 C18 C19 -172.4(2) 1_454 . . . ?
N4 C18 C19 C20 0.1(5) . . . . ?
C18 C19 C20 C21 -2.0(4) . . . . ?
C18 C19 C20 C17 176.6(3) . . . . ?
N3B C17 C20 C21 171.1(18) . . . . ?
N3A C17 C20 C21 -12.4(4) . . . . ?
S2A C17 C20 C21 165.7(2) . . . . ?
S2B C17 C20 C21 -12.7(6) . . . . ?
N3B C17 C20 C19 -7.4(18) . . . . ?
N3A C17 C20 C19 169.1(3) . . . . ?
S2A C17 C20 C19 -12.8(4) . . . . ?
S2B C17 C20 C19 168.8(5) . . . . ?
C19 C20 C21 C22 2.4(4) . . . . ?
C17 C20 C21 C22 -176.2(2) . . . . ?
C18 N4 C22 C21 -0.8(4) . . . . ?
Zn N4 C22 C21 172.9(2) 1_454 . . . ?
C20 C21 C22 N4 -1.1(4) . . . . ?
C24B N5 C23 O5 -172.6(9) . . . . ?
C25A N5 C23 O5 -50.4(14) . . . . ?
C24A N5 C23 O5 177.0(9) . . . . ?
C25B N5 C23 O5 11.1(11) . . . . ?
 
_refine_diff_density_max    0.645
_refine_diff_density_min   -0.581
_refine_diff_density_rms    0.086

_shelx_res_file
;

    Zn-BpTzTz-Isopht.res created by SHELXL-2014/7


TITL mo_GM_Milan_SM_MOF15_2Mess_0m in P-1
CELL 0.71073 9.1388 10.0354 14.2804 88.417 88.236 75.636
ZERR 2.00 0.0006 0.0007 0.0011 0.004 0.005 0.004
LATT 1
SFAC C H N O S ZN
UNIT 50 38 10 10 4 2
LIST 4 ! automatically inserted. Change 6 to 4 for CHECKCIF!!
TEMP -173.150
SIZE 0.010 0.050 0.100
ACTA
OMIT -1 51.6
OMIT 2 2 3
OMIT 3 3 5
OMIT 3 4 8
OMIT 4 4 8
OMIT 0 3 0
L.S. 8
FMAP 2
PLAN 20
HTAB
BOND $H
CONF
WGHT    0.040100    0.725900
FVAR       0.13474   0.90368   0.44692   0.37156
ZN    6    1.144255    0.121607    0.468111    11.00000    0.01073    0.00945 =
         0.01095   -0.00063   -0.00091   -0.00303
PART 1
S1A   5    0.806835   -0.020351    0.024587    21.00000    0.01588    0.02182 =
         0.01249   -0.00252   -0.00472   -0.00355
N2A   3    0.648144    0.222358    0.073991    21.00000    0.02190    0.02071 =
         0.01643   -0.00254   -0.00765   -0.00462

S2A   5    0.440795    0.268628   -0.074601    21.00000    0.02244    0.02093 =
         0.01731   -0.00626   -0.00918   -0.00032
N3A   3    0.599938    0.025749   -0.122086    21.00000    0.01511    0.01765 =
         0.01284   -0.00184   -0.00411   -0.00310
PART 2
S1B   5    0.599996    0.282582    0.076468   -21.00000    0.03140
N2B   3    0.774255    0.050707    0.047198   -21.00000    0.02338
S2B   5    0.640825   -0.018444   -0.120112   -21.00000    0.02238
N3B   3    0.453731    0.218196   -0.088989   -21.00000    0.01121
PART 0
O1    4    0.941453    0.155626    0.540780    11.00000    0.01193    0.01559 =
         0.01867   -0.00005    0.00185   -0.00305
O2    4    0.736569    0.073824    0.554255    11.00000    0.01344    0.00953 =
         0.01500   -0.00057   -0.00362   -0.00463
O3    4    0.881697    0.658867    0.540379    11.00000    0.01578    0.01555 =
         0.02092   -0.00125    0.00272   -0.00780
O4    4    0.670364    0.793529    0.593806    11.00000    0.02065    0.00922 =
         0.02311   -0.00307    0.00254   -0.00401
N1    3    1.026841    0.130325    0.337750    11.00000    0.01422    0.01580 =
         0.01180   -0.00088   -0.00160   -0.00541
N4    3    0.245451    0.112423   -0.397101    11.00000    0.01164    0.01428 =
         0.01117    0.00024   -0.00157   -0.00391
C1    1    0.709647    0.310669    0.578736    11.00000    0.01528    0.01335 =
         0.01468   -0.00096   -0.00042   -0.00455
C2    1    0.558714    0.329105    0.607864    11.00000    0.01926    0.01219 =
         0.02589   -0.00008    0.00476   -0.00740
AFIX  43
H2    2    0.514692    0.252698    0.612150    11.00000   -1.20000
AFIX   0
C3    1    0.473273    0.459580    0.630532    11.00000    0.01431    0.01990 =
         0.03136   -0.00289    0.00842   -0.00320
AFIX  43
H3    2    0.371858    0.471865    0.652785    11.00000   -1.20000
AFIX   0
C4    1    0.535804    0.571980    0.620726    11.00000    0.01903    0.01491 =
         0.02616   -0.00198    0.00583   -0.00404
AFIX  43
H4    2    0.476709    0.661363    0.635281    11.00000   -1.20000
AFIX   0
C5    1    0.684604    0.553832    0.589670    11.00000    0.01587    0.01241 =
         0.01466   -0.00158   -0.00148   -0.00439
C6    1    0.771697    0.423607    0.569336    11.00000    0.01270    0.01424 =
         0.01259   -0.00201    0.00182   -0.00449
AFIX  43
H6    2    0.874001    0.411459    0.548932    11.00000   -1.20000
AFIX   0
C7    1    0.801993    0.172003    0.555469    11.00000    0.01201    0.01312 =
         0.00318    0.00236   -0.00301   -0.00308
C8    1    0.750066    0.676825    0.574174    11.00000    0.01461    0.01667 =
         0.01060   -0.00075   -0.00560   -0.00297
C9    1    1.068670    0.032601    0.273487    11.00000    0.01599    0.01688 =
         0.01394    0.00002   -0.00113   -0.00473
AFIX  43
H9    2    1.160132   -0.035749    0.282375    11.00000   -1.20000
AFIX   0
C10   1    0.987305    0.025476    0.195745    11.00000    0.02342    0.02014 =
         0.01048   -0.00146    0.00100   -0.00708
AFIX  43
H10   2    1.020995   -0.047487    0.153131    11.00000   -1.20000
AFIX   0
C11   1    0.854745    0.126072    0.179654    11.00000    0.01506    0.02467 =
         0.01053    0.00161   -0.00133   -0.00995
C12   1    0.811565    0.230037    0.245345    11.00000    0.01314    0.02551 =
         0.01664    0.00102   -0.00538    0.00004
AFIX  43
H12   2    0.722646    0.301603    0.236865    11.00000   -1.20000
AFIX   0
C13   1    0.898349    0.227965    0.321985    11.00000    0.02085    0.01777 =
         0.01698   -0.00304   -0.00217   -0.00099
AFIX  43
H13   2    0.866601    0.298813    0.366361    11.00000   -1.20000
AFIX   0
C14   1    0.763461    0.124360    0.098505    11.00000    0.01805    0.02583 =
         0.01287   -0.00261    0.00080   -0.00830
C15   1    0.657655    0.062593   -0.042146    11.00000    0.01591    0.02468 =
         0.01445    0.00059    0.00050   -0.00589
C16   1    0.587637    0.187457   -0.006636    11.00000    0.01998    0.02421 =
         0.01730   -0.00290    0.00002   -0.00647
C17   1    0.483710    0.124288   -0.147595    11.00000    0.01426    0.02142 =
         0.01081   -0.00129    0.00159   -0.00498
C18   1    0.189753    0.205753   -0.331496    11.00000    0.01533    0.02074 =
         0.01573   -0.00275   -0.00223   -0.00022
AFIX  43
H18   2    0.096422    0.270396   -0.342790    11.00000   -1.20000
AFIX   0
C19   1    0.259895    0.213132   -0.249063    11.00000    0.01932    0.02384 =
         0.01352   -0.00828   -0.00003   -0.00171
AFIX  43
H19   2    0.215380    0.281282   -0.204815    11.00000   -1.20000
AFIX   0
C20   1    0.398137    0.119115   -0.230528    11.00000    0.01400    0.01983 =
         0.01038   -0.00030    0.00004   -0.00747
C21   1    0.453763    0.019685   -0.297304    11.00000    0.01591    0.01291 =
         0.01132    0.00165   -0.00187   -0.00390
AFIX  43
H21   2    0.544856   -0.048526   -0.286995    11.00000   -1.20000
AFIX   0
C22   1    0.376072    0.020805   -0.378259    11.00000    0.01217    0.01346 =
         0.01384   -0.00160    0.00073   -0.00262
AFIX  43
H22   2    0.417003   -0.047002   -0.423448    11.00000   -1.20000
AFIX   0
REM DMF solvent
N5    3    0.162994    0.475297    0.142376    11.00000    0.09036    0.04303 =
         0.10549   -0.01306    0.05743   -0.01527
O5    4    0.092199    0.705718    0.118203    11.00000    0.16124    0.04089 =
         0.15532   -0.01075    0.04462    0.01336
C23   1    0.181883    0.596648    0.138506    11.00000    0.09512    0.05368 =
         0.10502    0.00139    0.02448   -0.01480
AFIX  43
H23   2    0.280067    0.603996    0.153580    11.00000   -1.20000
AFIX   0
PART 3
C24A  1    0.304235    0.356495    0.166052    31.00000    0.07393
AFIX 137
H24A  2    0.395467    0.391112    0.160363    31.00000   -1.50000
H24B  2    0.312339    0.281258    0.122354    31.00000   -1.50000
H24C  2    0.293459    0.322626    0.230283    31.00000   -1.50000
AFIX   0
C25A  1    0.042531    0.451133    0.191603    41.00000    0.08083
AFIX 137
H25A  2    0.029145    0.501615    0.250290    41.00000   -1.50000
H25B  2    0.059955    0.352380    0.205649    41.00000   -1.50000
H25C  2   -0.048531    0.481947    0.154431    41.00000   -1.50000
AFIX   0
PART 4
C24B  1    0.228638    0.343780    0.167666   -31.00000    0.05066
AFIX 137
H24D  2    0.224084    0.283071    0.115823   -31.00000   -1.50000
H24E  2    0.175024    0.317141    0.222771   -31.00000   -1.50000
H24F  2    0.334406    0.335759    0.182744   -31.00000   -1.50000
AFIX   0
C25B  1    0.000841    0.471709    0.095167   -41.00000    0.16964
AFIX 137
H25D  2   -0.078171    0.482241    0.144326   -41.00000   -1.50000
H25E  2    0.011703    0.383652    0.064296   -41.00000   -1.50000
H25F  2   -0.026992    0.547111    0.048934   -41.00000   -1.50000
PART 0

AFIX   0
HKLF 4 1 1 0 0 0 1 0 0 0 1

REM  mo_GM_Milan_SM_MOF15_2Mess_0m in P-1
REM R1 =  0.0400 for    3696 Fo > 4sig(Fo)  and  0.0609 for all    4743 data
REM    364 parameters refined using      0 restraints

END

WGHT      0.0401      0.7262

REM Instructions for potential hydrogen bonds
EQIV $1 -x+2, -y, -z+1
HTAB C9 O2_$1
EQIV $2 x+1, y-1, z
HTAB C10 O5_$2
HTAB C12 S1B
EQIV $3 x, y-1, z-1
HTAB C21 O4_$3
EQIV $4 -x+1, -y, -z
HTAB C22 O2_$4
HTAB C22 O4_$3

REM Highest difference peak  0.645,  deepest hole -0.581,  1-sigma level  0.086
Q1    1  -0.0023  0.4546  0.1320  11.00000  0.05    0.64
Q2    1   0.0316  0.4730  0.0617  11.00000  0.05    0.42
Q3    1   0.2757  0.3329  0.1728  11.00000  0.05    0.39
Q4    1   1.1236  0.0380  0.4647  11.00000  0.05    0.37
Q5    1   0.6999  0.6149  0.5803  11.00000  0.05    0.35
Q6    1   0.3401  0.1550 -0.2452  11.00000  0.05    0.35
Q7    1   0.0480  0.2405  0.0113  11.00000  0.05    0.35
Q8    1  -0.1254  0.5147 -0.0179  11.00000  0.05    0.34
Q9    1   0.2193  0.7067  0.1569  11.00000  0.05    0.33
Q10   1   0.7156  0.0291 -0.0075  11.00000  0.05    0.33
Q11   1   0.3735  0.4973  0.1242  11.00000  0.05    0.33
Q12   1   0.4162  0.0563 -0.2570  11.00000  0.05    0.32
Q13   1   0.1681  0.3924  0.1682  11.00000  0.05    0.30
Q14   1   0.2256  0.4871  0.1842  11.00000  0.05    0.30
Q15   1   1.0298  0.0814  0.3095  11.00000  0.05    0.30
Q16   1   0.3527  0.3895  0.1573  11.00000  0.05    0.29
Q17   1   0.7561  0.2401  0.5672  11.00000  0.05    0.29
Q18   1   0.3015  0.5374  0.1408  11.00000  0.05    0.29
Q19   1   1.0036  0.0849  0.5040  11.00000  0.05    0.29
Q20   1   0.2216  0.1604 -0.4414  11.00000  0.05    0.29
;
_shelx_res_checksum   19476

_shelx_hkl_file
;
  -1   0   0    8.69    0.37
  -1   0   0    8.87    0.25
  -1   0   0    8.62    0.23
  -1   0   0    8.34    0.34
  -1   0   0    8.33    0.46
   1   0   0    9.04    0.24
   1   0   0    8.52    0.34
   1   0   0    8.93    0.26
   1   0   0    8.26    0.23
   1   0   0    8.14    0.43
   1   0   0    8.81    0.37
   1   0   0    8.55    0.28
  -2   0   0   27.24    1.16
  -2   0   0   26.31    0.86
  -2   0   0   26.08    0.91
   2   0   0   26.17    0.70
   2   0   0   26.65    0.74
   2   0   0   26.10    1.09
   2   0   0   26.56    0.87
   2   0   0   26.29    0.92
   2   0   0   25.76    0.64
   2   0   0   27.45    0.66
  -3   0   0   98.35    2.93
  -3   0   0  101.28    2.40
  -3   0   0   99.87    2.46
   3   0   0   98.11    2.39
   3   0   0   99.17    2.80
   3   0   0  100.44    2.14
   3   0   0   99.81    2.18
   3   0   0  100.37    2.47
  -4   0   0    7.36    0.71
   4   0   0    7.17    0.57
   4   0   0    7.35    0.73
   4   0   0    6.48    0.63
   4   0   0    8.02    0.93
   4   0   0    6.28    0.52
  -5   0   0    6.45    0.74
  -5   0   0    4.99    0.93
   5   0   0    6.32    0.94
   5   0   0    5.77    0.65
   5   0   0    5.21    0.69
   5   0   0    6.58    0.62
  -6   0   0    4.23    1.00
  -6   0   0    3.37    0.63
   6   0   0    4.29    0.92
   6   0   0    2.70    0.61
   6   0   0    3.51    0.57
   6   0   0    2.71    0.55
   6   0   0    2.86    0.61
  -7   0   0   12.64    1.69
   7   0   0   12.39    0.99
   7   0   0   14.51    1.53
   7   0   0   12.00    1.21
   7   0   0   13.45    1.10
  -8   0   0   -0.17    0.87
   8   0   0    0.46    0.56
   8   0   0    0.46    0.77
   8   0   0    0.37    0.50
   9   0   0   -0.22    0.62
   9   0   0    0.16    0.58
   9   0   0    0.74    0.84
  10   0   0   11.87    1.71
  10   0   0   11.14    1.28
  10   0   0    7.00    1.14
  11   0   0    1.06    0.83
  11   0   0    0.86    1.15
  11   0   0    0.79    0.89
  12   0   0   -1.03    0.82
  12   0   0    0.32    0.97
  12  -1   0    0.56    0.92
  12  -1   0    1.26    1.02
  11  -1   0    2.58    1.30
  11  -1   0    0.88    0.89
  11  -1   0    1.12    0.91
  10  -1   0   -1.17    0.63
  10  -1   0    0.35    0.96
  10  -1   0   -0.86    0.60
   9  -1   0    0.67    0.64
   9  -1   0    1.09    0.87
   9  -1   0    1.68    0.75
   8  -1   0   10.12    1.33
   8  -1   0   10.08    1.10
   8  -1   0    6.27    0.91
  -8   1   0    7.64    1.61
   7  -1   0    4.82    0.88
   7  -1   0    4.84    0.72
   7  -1   0    5.50    1.02
   7  -1   0    5.76    0.84
  -7   1   0    4.49    1.20
   6  -1   0    8.70    1.02
   6  -1   0    8.20    0.85
   6  -1   0    8.73    0.80
   6  -1   0    9.11    1.08
  -6   1   0    7.97    0.98
   5  -1   0    7.21    0.90
   5  -1   0    6.35    0.70
   5  -1   0    7.84    0.89
   5  -1   0    9.00    0.69
   5  -1   0    8.45    0.71
  -5   1   0    9.52    0.95
   4  -1   0   50.61    1.61
   4  -1   0   51.61    1.46
   4  -1   0   52.48    1.48
   4  -1   0   50.10    1.83
   4  -1   0   50.78    1.82
  -4   1   0   49.48    2.04
  -4   1   0   50.63    1.80
   3  -1   0    0.43    0.28
   3  -1   0    0.49    0.44
   3  -1   0    0.42    0.26
   3  -1   0    0.69    0.37
   3  -1   0    0.62    0.25
  -3   1   0    1.00    0.44
  -3   1   0    0.55    0.42
  -3   1   0   -0.05    0.27
   2  -1   0    3.48    0.38
   2  -1   0    3.70    0.36
   2  -1   0    3.12    0.52
   2  -1   0    3.16    0.43
   2  -1   0    3.36    0.34
   2  -1   0    2.96    0.29
  -2   1   0    3.56    0.27
  -2   1   0    3.62    0.32
  -2   1   0    3.54    0.48
  -2   1   0    3.68    0.32
  -2   1   0    3.39    0.30
  -2   1   0    4.47    0.40
  -2   1   0    3.06    0.49
   1  -1   0   45.16    1.33
   1  -1   0   47.36    1.06
   1  -1   0   47.60    1.06
   1  -1   0   46.57    1.16
   1  -1   0   46.32    1.13
   1  -1   0   46.82    1.09
  -1   1   0   47.82    1.18
  -1   1   0   45.39    1.07
  -1   1   0   46.38    1.35
  -1   1   0   46.57    1.13
  -1   1   0   49.51    1.05
  -1   1   0   46.37    1.06
   0  -1   0  247.53    4.62
   0  -1   0  253.94    4.83
   0  -1   0  245.11    5.00
   0  -1   0  253.20    4.60
   0   1   0  236.09    4.60
   0   1   0  249.66    4.58
   0   1   0  249.04    4.82
  -1  -1   0    0.13    0.37
  -1  -1   0    0.09    0.12
  -1  -1   0    0.11    0.11
  -1  -1   0    0.08    0.11
  -1  -1   0   -0.03    0.08
  -1  -1   0   -0.09    0.27
   1   1   0   -0.01    0.10
   1   1   0    0.05    0.08
   1   1   0    0.02    0.13
   1   1   0    0.13    0.08
   1   1   0    0.11    0.24
   1   1   0   -0.13    0.25
   1   1   0    0.02    0.12
  -2  -1   0    8.70    0.77
  -2  -1   0    8.61    0.49
  -2  -1   0    8.32    0.64
  -2  -1   0    9.52    0.95
   2   1   0    8.41    0.37
   2   1   0    8.49    0.49
   2   1   0    8.48    0.32
   2   1   0   10.07    0.92
   2   1   0    8.13    0.43
   2   1   0    9.09    0.76
   2   1   0    7.97    0.63
   2   1   0    8.13    0.37
  -3  -1   0    7.46    0.57
  -3  -1   0    7.50    0.86
  -3  -1   0    9.24    1.04
  -3  -1   0    8.37    0.69
   3   1   0    7.94    0.40
   3   1   0    7.68    0.48
   3   1   0    8.67    0.65
   3   1   0    8.31    0.43
   3   1   0    6.72    0.56
   3   1   0    9.71    1.03
  -4  -1   0    0.02    0.33
  -4  -1   0    0.51    0.59
   4   1   0    0.21    0.23
   4   1   0    0.31    0.36
   4   1   0    0.13    0.29
   4   1   0   -0.65    0.49
   4   1   0   -0.27    0.32
  -5  -1   0   39.33    2.10
  -5  -1   0   38.89    1.43
   5   1   0   41.19    2.01
   5   1   0   39.42    1.48
   5   1   0   38.69    1.50
   5   1   0   39.64    1.30
  -6  -1   0   44.13    2.41
  -6  -1   0   42.86    1.59
   6   1   0   42.00    2.19
   6   1   0   41.96    1.68
   6   1   0   44.87    1.74
   6   1   0   44.13    1.52
  -7  -1   0    0.48    0.82
   7   1   0   -0.26    0.43
   7   1   0    0.01    0.71
   7   1   0   -0.16    0.42
   7   1   0    0.89    0.51
  -8  -1   0   -1.78    0.73
   8   1   0   -0.03    0.78
   8   1   0   -0.29    0.48
   8   1   0    1.01    0.57
   9   1   0   29.96    2.30
   9   1   0   33.00    1.86
   9   1   0   31.84    1.70
  10   1   0    7.94    1.57
  10   1   0    5.13    0.96
  10   1   0    6.88    1.13
  11   1   0   -0.49    0.97
  11   1   0    0.57    0.79
  11   1   0   -0.12    0.84
  12   1   0    2.41    1.03
  12   1   0   -0.01    0.99
  12   1   0    3.01    1.36
  11  -2   0    1.05    0.90
  11  -2   0    0.54    0.83
  10  -2   0    2.13    0.84
  10  -2   0    2.25    0.87
  10  -2   0    2.91    1.10
   9  -2   0    0.96    0.70
   9  -2   0    1.07    0.70
   9  -2   0    1.08    0.87
   8  -2   0   20.36    1.60
   8  -2   0   16.71    1.27
   8  -2   0   16.83    1.37
   7  -2   0    0.06    0.53
   7  -2   0    0.58    0.53
   7  -2   0    1.39    0.69
   6  -2   0    0.69    0.49
   6  -2   0    0.46    0.41
   6  -2   0    1.35    0.62
   6  -2   0   -0.14    0.40
   6  -2   0    0.55    0.59
  -6   2   0    1.67    0.67
   5  -2   0    4.17    0.57
   5  -2   0    3.84    0.69
   5  -2   0    5.09    0.65
   5  -2   0    3.93    0.76
   5  -2   0    4.63    0.62
  -5   2   0    4.82    0.84
   4  -2   0    3.65    0.52
   4  -2   0    3.72    0.49
   4  -2   0    3.68    0.59
   4  -2   0    4.31    0.54
   4  -2   0    3.08    0.66
  -4   2   0    4.12    0.72
  -4   2   0    3.70    0.73
   3  -2   0    2.10    0.43
   3  -2   0    2.09    0.38
   3  -2   0    2.96    0.64
   3  -2   0    1.66    0.37
   3  -2   0    1.15    0.31
  -3   2   0    1.60    0.36
  -3   2   0    2.94    0.36
  -3   2   0    2.08    0.50
  -3   2   0    2.56    0.36
  -3   2   0    1.37    0.25
  -3   2   0    1.85    0.57
  -3   2   0    2.43    0.35
  -3   2   0    1.75    0.32
   2  -2   0   36.37    1.11
   2  -2   0   36.04    1.14
   2  -2   0   35.89    1.13
   2  -2   0   33.06    1.42
   2  -2   0   38.06    1.08
  -2   2   0   35.50    1.11
  -2   2   0   36.63    1.03
  -2   2   0   37.16    1.18
  -2   2   0   36.92    1.05
  -2   2   0   36.03    1.00
  -2   2   0   39.33    1.50
   1  -2   0   15.72    1.02
   1  -2   0   16.74    0.70
   1  -2   0   16.16    0.69
   1  -2   0   17.35    0.67
  -1   2   0   15.35    1.03
  -1   2   0   18.03    0.69
  -1   2   0   16.83    0.62
  -1   2   0   17.73    0.68
  -1   2   0   17.17    0.68
   0  -2   0    1.06    0.43
   0  -2   0    0.78    0.20
   0  -2   0    0.35    0.22
   0  -2   0    0.55    0.22
   0  -2   0    0.53    0.25
   0   2   0    0.10    0.20
   0   2   0    0.79    0.25
   0   2   0    0.72    0.22
   0   2   0    0.71    0.22
  -1  -2   0    1.72    0.26
  -1  -2   0    1.78    0.21
  -1  -2   0    2.84    0.74
  -1  -2   0    1.80    0.27
  -1  -2   0    1.72    0.27
   1   2   0    1.73    0.29
   1   2   0    2.00    0.23
   1   2   0    2.05    0.70
   1   2   0    1.56    0.26
   1   2   0    1.66    0.26
  -2  -2   0   13.04    0.57
  -2  -2   0   13.30    0.50
  -2  -2   0   12.08    0.40
  -2  -2   0   13.67    1.05
  -2  -2   0   13.82    1.29
  -2  -2   0   12.13    0.49
   2   2   0   13.09    0.45
   2   2   0   13.82    0.58
   2   2   0   11.83    0.92
   2   2   0   12.12    0.51
   2   2   0   12.60    0.58
   2   2   0   11.82    0.89
  -3  -2   0    1.82    0.62
  -3  -2   0    1.50    0.32
  -3  -2   0    1.05    0.76
   3   2   0    1.33    0.31
   3   2   0    1.16    0.32
   3   2   0    1.49    0.49
   3   2   0    1.26    0.44
   3   2   0    2.76    0.78
  -4  -2   0   30.86    1.77
  -4  -2   0   29.97    1.09
   4   2   0   31.17    1.05
   4   2   0   29.58    1.31
   4   2   0   29.51    1.11
   4   2   0   29.51    1.79
  -5  -2   0   56.59    2.61
  -5  -2   0   62.51    1.82
   5   2   0   60.78    1.86
   5   2   0   61.31    2.08
   5   2   0   61.80    2.67
   5   2   0   63.74    1.74
  -6  -2   0   26.55    1.21
  -6  -2   0   26.94    2.00
   6   2   0   25.93    1.85
   6   2   0   25.99    1.25
   6   2   0   26.82    1.17
   6   2   0   27.18    1.41
  -7  -2   0    8.27    1.52
   7   2   0    7.30    0.86
   7   2   0    6.26    0.78
   7   2   0    7.76    1.37
   7   2   0    7.74    0.96
  -8  -2   0    5.54    1.48
   8   2   0    4.52    1.21
   8   2   0    7.55    0.92
   8   2   0    7.30    1.03
   9   2   0   18.26    2.14
   9   2   0   15.58    1.33
   9   2   0   17.39    1.49
  10   2   0    1.68    0.80
  10   2   0    0.23    1.01
  10   2   0    0.48    0.70
  10   2   0   -0.75    0.64
  11   2   0   -0.16    0.84
  11   2   0    0.59    0.77
  11   2   0    0.38    1.06
  12   2   0    2.20    1.01
  12   2   0    2.08    0.97
  12   2   0    1.85    1.39
  11  -3   0   17.78    1.76
  11  -3   0   14.51    1.62
  10  -3   0   -0.07    0.75
  10  -3   0    0.99    0.88
   9  -3   0    6.15    1.07
   9  -3   0    8.26    1.10
   9  -3   0    6.28    1.34
   8  -3   0    0.21    0.71
   8  -3   0    0.21    0.60
   8  -3   0   -0.01    0.59
   7  -3   0    0.62    0.58
   7  -3   0    0.63    0.62
   7  -3   0   -0.57    0.49
   6  -3   0   18.07    1.27
   6  -3   0   22.57    1.60
   6  -3   0   21.32    1.30
   6  -3   0   20.70    1.22
  -6   3   0   22.90    1.65
   5  -3   0    9.92    0.87
   5  -3   0   11.83    0.93
   5  -3   0   11.31    1.28
   5  -3   0   12.14    0.91
   5  -3   0   10.96    0.92
  -5   3   0   13.10    1.34
   4  -3   0    0.71    0.37
   4  -3   0    0.83    0.37
   4  -3   0    0.81    0.41
   4  -3   0    1.07    0.62
   4  -3   0    0.84    0.41
  -4   3   0    1.32    0.52
  -4   3   0    0.96    0.62
  -4   3   0    0.77    0.29
  -4   3   0    0.91    0.25
  -4   3   0    0.75    0.32
   3  -3   0   53.14    2.10
   3  -3   0   55.01    1.57
   3  -3   0   55.63    1.67
  -3   3   0   55.79    1.51
  -3   3   0   52.37    2.11
  -3   3   0   52.83    1.50
  -3   3   0   56.95    1.78
   2  -3   0   43.29    1.39
   2  -3   0   45.90    1.82
   2  -3   0   45.35    1.32
   2  -3   0   42.94    1.37
  -2   3   0   44.45    1.84
  -2   3   0   45.11    1.39
  -2   3   0   45.11    1.36
  -2   3   0   44.84    1.31
   1  -3   0    1.29    0.35
   1  -3   0    1.18    0.32
   1  -3   0    0.67    0.48
   1  -3   0    1.54    0.33
  -1   3   0    1.43    0.56
  -1   3   0    1.28    0.32
  -1   3   0    0.40    0.24
  -1   3   0    0.90    0.29
   0  -3   0   10.89    0.64
   0  -3   0   11.25    0.61
   0  -3   0   10.10    0.89
   0   3   0   10.63    0.60
   0   3   0   11.41    0.59
  -1  -3   0   59.58    1.38
  -1  -3   0   59.40    1.51
  -1  -3   0   59.21    1.54
   1   3   0   60.17    1.54
   1   3   0   61.34    1.55
   1   3   0   62.63    1.53
   1   3   0   60.11    2.43
  -2  -3   0   30.31    0.93
  -2  -3   0   30.07    0.99
  -2  -3   0   31.35    0.90
  -2  -3   0   30.52    1.87
  -2  -3   0   30.87    0.81
   2   3   0   31.40    0.99
   2   3   0   30.44    1.48
   2   3   0   31.68    1.78
   2   3   0   30.38    0.95
   2   3   0   31.08    1.01
  -3  -3   0   12.66    0.44
  -3  -3   0   12.65    0.54
  -3  -3   0   13.15    0.53
  -3  -3   0   14.32    0.70
  -3  -3   0   12.72    1.22
   3   3   0   13.23    0.70
   3   3   0   13.99    0.70
   3   3   0   13.90    1.08
   3   3   0   11.74    1.00
  -4  -3   0   10.52    0.68
  -4  -3   0   10.87    1.27
   4   3   0   10.52    1.08
   4   3   0   10.25    0.71
   4   3   0   11.12    0.70
   4   3   0   11.09    1.02
   4   3   0    6.17    1.06
  -5  -3   0   46.55    1.49
  -5  -3   0   47.99    2.42
   5   3   0   44.06    1.47
   5   3   0   42.48    1.83
   5   3   0   46.44    1.55
   5   3   0   47.29    2.46
  -6  -3   0    5.70    1.22
  -6  -3   0    6.53    0.67
   6   3   0    4.92    0.80
   6   3   0    5.02    0.65
   6   3   0    5.22    0.66
   6   3   0    8.19    1.37
  -7  -3   0    7.61    1.49
   7   3   0    6.50    1.34
   7   3   0    5.94    0.79
   7   3   0    6.71    0.97
   7   3   0    7.43    0.83
  -8  -3   0   10.92    1.84
   8   3   0   13.88    1.20
   8   3   0   12.24    1.31
   8   3   0   12.93    1.83
  -9  -3   0   -0.11    0.98
   9   3   0   -0.78    0.61
   9   3   0    0.62    0.65
   9   3   0   -0.32    0.89
  10   3   0   12.77    1.33
  10   3   0   12.60    1.46
  10   3   0    8.63    1.77
  11   3   0    5.46    1.52
  11   3   0    3.65    1.03
  11   3   0    4.37    1.05
  12   3   0    2.00    0.95
  12   3   0    2.32    1.40
  12   3   0    1.45    1.06
  11  -4   0   10.40    1.43
  10  -4   0    8.36    1.29
  10  -4   0    8.24    1.34
   9  -4   0    1.10    0.80
   9  -4   0    0.76    0.76
   8  -4   0   25.59    1.68
   8  -4   0   23.90    1.56
   7  -4   0   22.38    1.47
   7  -4   0   19.91    1.34
   6  -4   0    0.07    0.50
   6  -4   0    0.02    0.49
   5  -4   0    8.81    0.90
   5  -4   0    8.84    0.90
   5  -4   0    8.63    0.86
   5  -4   0    6.97    1.12
   4  -4   0    0.97    0.67
   4  -4   0    1.29    0.46
   4  -4   0    1.23    0.46
   4  -4   0    2.23    0.52
  -4   4   0    1.48    0.39
  -4   4   0    1.06    0.67
  -4   4   0    1.44    0.31
  -4   4   0    1.85    0.43
  -4   4   0    1.84    0.58
   3  -4   0   29.14    1.25
   3  -4   0   29.55    1.69
   3  -4   0   31.35    1.21
   3  -4   0   31.06    1.28
  -3   4   0   28.77    1.11
  -3   4   0   30.29    1.16
  -3   4   0   30.43    1.22
  -3   4   0   28.57    1.70
   2  -4   0   46.23    2.05
   2  -4   0   53.34    1.66
   2  -4   0   51.20    1.54
   2  -4   0   52.52    1.65
  -2   4   0   51.31    1.55
  -2   4   0   50.78    1.60
  -2   4   0   51.97    1.54
  -2   4   0   48.68    1.53
   1  -4   0   38.62    1.33
   1  -4   0   38.65    1.32
   1  -4   0   39.66    1.25
   1  -4   0   41.72    1.86
  -1   4   0   38.72    1.29
  -1   4   0   37.77    1.28
  -1   4   0   39.82    1.32
   0  -4   0    1.56    0.65
   0  -4   0    1.65    0.40
   0  -4   0    1.47    0.38
   0   4   0    1.42    0.35
   0   4   0    1.52    0.37
  -1  -4   0   55.43    2.07
  -1  -4   0   54.19    1.54
  -1  -4   0   56.53    1.58
   1   4   0   54.12    2.47
   1   4   0   53.73    1.55
   1   4   0   55.74    1.58
  -2  -4   0    7.07    0.58
  -2  -4   0    7.79    0.57
   2   4   0    7.56    0.58
   2   4   0    7.38    0.66
   2   4   0    6.50    0.93
   2   4   0    6.89    0.56
  -3  -4   0   11.91    0.58
  -3  -4   0   10.60    0.61
  -3  -4   0   10.15    0.69
  -3  -4   0   10.98    0.47
   3   4   0   10.82    0.69
   3   4   0   10.58    0.74
   3   4   0   10.07    1.07
   3   4   0   13.62    1.62
  -4  -4   0   31.84    1.96
  -4  -4   0   32.96    1.17
   4   4   0   34.68    1.72
   4   4   0   29.22    2.04
   4   4   0   32.05    1.22
   4   4   0   31.03    1.69
   4   4   0   32.69    1.20
  -5  -4   0   10.79    1.45
  -5  -4   0   10.68    0.75
   5   4   0   11.64    1.15
   5   4   0   10.97    0.83
   5   4   0    9.71    0.76
   5   4   0   10.62    1.21
  -6  -4   0   19.00    1.01
  -6  -4   0   19.53    2.03
   6   4   0   18.54    1.39
   6   4   0   16.90    1.06
   6   4   0   16.57    1.04
  -7  -4   0    9.96    1.66
   7   4   0    7.99    1.12
   7   4   0    8.47    0.92
   7   4   0   10.31    1.76
   7   4   0    8.07    0.87
  -8  -4   0   26.57    2.75
   8   4   0   28.54    1.83
   8   4   0   25.87    1.47
   8   4   0   22.43    2.40
  -9  -4   0    6.94    1.79
   9   4   0    8.05    1.24
   9   4   0    5.56    1.56
   9   4   0   10.76    1.18
  10   4   0   11.15    1.35
  10   4   0   12.61    1.54
  10   4   0    9.18    1.85
  11   4   0   26.21    2.94
  11   4   0   26.64    2.07
  11   4   0   26.16    1.88
  12   4   0    0.78    1.32
  12   4   0   -0.60    0.89
  12   4   0    0.11    0.90
  10  -5   0    0.95    0.90
   9  -5   0    4.14    1.12
   9  -5   0    2.39    0.93
   8  -5   0   27.42    1.83
   8  -5   0   27.19    1.73
   7  -5   0    2.83    0.83
   7  -5   0    2.16    0.76
   6  -5   0    1.65    0.63
   6  -5   0    0.98    0.63
   5  -5   0   61.66    2.20
   5  -5   0   58.28    2.05
  -5   5   0   53.30    1.48
   4  -5   0   -0.20    0.40
   4  -5   0   -0.75    0.56
   4  -5   0   -0.07    0.43
   4  -5   0    0.38    0.46
  -4   5   0    0.18    0.27
  -4   5   0    0.24    0.36
  -4   5   0    0.36    0.40
   3  -5   0   17.67    1.03
   3  -5   0   19.38    1.12
   3  -5   0   18.42    1.52
   3  -5   0   16.82    1.09
  -3   5   0   18.80    1.03
  -3   5   0   19.02    0.99
  -3   5   0   19.09    0.99
   2  -5   0   13.48    0.89
   2  -5   0   18.09    0.95
   2  -5   0   18.99    1.47
   2  -5   0   18.82    1.06
  -2   5   0   17.92    0.95
  -2   5   0   17.74    0.88
  -2   5   0   17.05    0.98
   1  -5   0   20.67    1.03
   1  -5   0   19.56    1.05
   1  -5   0   19.37    1.47
   1  -5   0   20.03    0.94
  -1   5   0   20.24    1.02
  -1   5   0   19.98    0.98
  -1   5   0   20.38    0.97
   0  -5   0   10.67    0.75
   0  -5   0   11.27    1.27
   0  -5   0   10.74    0.79
   0   5   0   11.65    0.77
   0   5   0   10.96    0.74
  -1  -5   0    0.08    0.40
  -1  -5   0    0.24    0.30
  -1  -5   0    0.25    0.57
  -1  -5   0    0.81    0.34
   1   5   0    0.49    0.42
   1   5   0    0.07    0.30
   1   5   0   -0.37    0.62
   1   5   0    0.44    0.35
  -2  -5   0   13.02    0.80
  -2  -5   0   14.60    0.66
  -2  -5   0   13.70    1.27
  -2  -5   0   13.89    0.80
   2   5   0   12.98    0.88
   2   5   0   15.80    0.91
   2   5   0   12.57    0.77
   2   5   0   17.39    1.81
  -3  -5   0    6.15    0.45
  -3  -5   0    7.28    0.64
  -3  -5   0    7.47    0.61
   3   5   0    7.35    1.33
   3   5   0    6.83    0.72
   3   5   0    7.19    0.65
   3   5   0    5.12    0.94
  -4  -5   0    9.66    0.59
  -4  -5   0   10.27    0.73
   4   5   0   10.18    0.86
   4   5   0    9.56    1.17
   4   5   0   11.89    1.65
   4   5   0    9.48    0.73
   4   5   0   11.93    1.32
  -5  -5   0    1.74    0.42
   5   5   0    1.93    0.96
   5   5   0    1.46    0.52
   5   5   0    2.33    0.76
   5   5   0    1.73    0.73
   5   5   0    1.30    0.41
  -6  -5   0    0.51    0.93
  -6  -5   0    0.53    0.41
   6   5   0    0.25    0.38
   6   5   0    0.24    0.53
   6   5   0    0.86    0.50
   6   5   0   -0.39    0.65
  -7  -5   0  106.94    4.62
   7   5   0  104.99    3.09
   7   5   0  111.10    3.11
   7   5   0  111.15    3.74
   7   5   0  108.79    4.58
  -8  -5   0    2.09    1.22
   8   5   0    2.62    0.73
   8   5   0    2.29    0.87
   8   5   0    4.41    1.41
  -9  -5   0   24.17    2.94
   9   5   0   23.28    2.64
   9   5   0   23.33    1.90
   9   5   0   24.14    1.61
  10   5   0   29.00    2.16
  10   5   0   32.23    1.92
  10   5   0   35.25    2.98
  11   5   0    5.36    1.80
  11   5   0    7.58    1.41
  11   5   0    9.16    1.36
  12   5   0    2.96    1.66
  12   5   0    1.64    1.05
  12   5   0    0.61    1.02
  10  -6   0   -0.92    0.92
   9  -6   0   13.40    1.47
   8  -6   0    7.58    1.20
   8  -6   0    9.19    1.28
   7  -6   0    0.11    0.68
   7  -6   0    0.46    0.69
   6  -6   0   13.76    1.28
   6  -6   0   13.44    1.33
   5  -6   0   11.99    1.14
   5  -6   0   11.73    1.15
  -5   6   0   10.47    0.66
  -5   6   0   10.21    0.78
   4  -6   0    6.95    0.86
   4  -6   0    7.37    0.91
  -4   6   0    5.42    0.66
  -4   6   0    6.17    0.75
   3  -6   0   14.35    1.10
   3  -6   0   10.55    1.36
   3  -6   0   11.36    0.97
   3  -6   0   14.86    1.11
  -3   6   0   13.76    1.01
  -3   6   0   13.95    0.95
  -3   6   0   12.87    0.93
   2  -6   0    1.52    0.51
   2  -6   0    1.57    0.76
   2  -6   0    1.65    0.54
  -2   6   0    0.46    0.40
  -2   6   0    1.26    0.42
  -2   6   0    1.30    0.51
   1  -6   0    0.62    0.64
   1  -6   0    0.74    0.43
   1  -6   0    1.53    0.46
   1  -6   0    0.80    0.40
  -1   6   0    0.48    0.38
  -1   6   0    0.68    0.47
   0  -6   0    2.41    0.81
   0  -6   0    2.44    0.54
   0  -6   0    2.18    0.50
   0  -6   0    1.70    0.40
   0   6   0    3.00    0.53
   0   6   0    1.19    0.34
   0   6   0    3.12    0.51
  -1  -6   0   33.68    1.34
  -1  -6   0   32.90    1.33
  -1  -6   0   33.05    1.18
  -1  -6   0   32.84    1.89
   1   6   0   33.19    1.40
   1   6   0   31.03    1.27
   1   6   0   31.25    2.25
   1   6   0   33.04    1.32
  -2  -6   0    6.94    0.71
  -2  -6   0    6.15    0.64
  -2  -6   0    6.93    0.56
   2   6   0    6.50    0.67
   2   6   0    7.55    0.81
   2   6   0    6.11    1.34
   2   6   0    6.58    0.78
  -3  -6   0   23.01    1.07
  -3  -6   0   22.50    1.02
  -3  -6   0   21.15    0.82
   3   6   0   24.09    2.12
   3   6   0   23.28    1.20
   3   6   0   23.10    1.09
   3   6   0   19.86    1.56
  -4  -6   0   20.37    0.75
  -4  -6   0   23.05    1.10
  -4  -6   0   20.44    0.92
   4   6   0   23.39    1.79
   4   6   0   20.98    1.61
   4   6   0   21.50    1.09
   4   6   0   23.08    1.23
   4   6   0   23.29    2.32
  -5  -6   0    1.49    0.47
   5   6   0    0.90    0.42
   5   6   0    1.18    1.01
   5   6   0    0.33    0.69
   5   6   0    0.84    0.52
   5   6   0    0.68    0.74
  -6  -6   0   14.16    0.96
   6   6   0   15.10    1.25
   6   6   0   11.69    1.87
   6   6   0   14.90    1.02
   6   6   0   12.86    1.48
   6   6   0   13.81    1.62
  -7  -6   0    1.23    1.10
   7   6   0    1.60    0.89
   7   6   0    1.33    0.65
   7   6   0    0.50    0.93
  -8  -6   0    5.41    1.73
   8   6   0    6.75    1.23
   8   6   0    5.19    0.92
   8   6   0    6.00    1.59
  -9  -6   0   13.51    2.35
   9   6   0   10.47    1.29
   9   6   0    9.71    1.52
   9   6   0   15.56    2.34
  10   6   0   14.44    1.75
  10   6   0   14.84    1.57
  10   6   0    7.27    1.91
  11   6   0   -0.66    0.86
  11   6   0    0.70    0.92
  11   6   0    1.50    1.47
  12   6   0    9.67    2.28
  12   6   0    8.51    1.48
  12   6   0    5.15    1.42
   9  -7   0    3.41    1.14
   8  -7   0    8.54    1.34
   7  -7   0    1.18    0.82
   6  -7   0    9.66    1.18
   6  -7   0    9.50    1.27
   5  -7   0    3.19    0.79
   5  -7   0    2.05    0.74
  -5   7   0    2.67    0.54
  -5   7   0    2.55    0.61
  -5   7   0    3.81    0.48
   4  -7   0    0.46    0.61
   4  -7   0    0.41    0.61
  -4   7   0    0.84    0.48
  -4   7   0    1.28    0.57
   3  -7   0   47.06    1.96
   3  -7   0   47.98    2.01
   3  -7   0   44.17    1.80
  -3   7   0   44.96    1.83
  -3   7   0   46.54    1.72
   2  -7   0    4.48    0.72
   2  -7   0    5.50    0.80
   2  -7   0    5.43    0.81
   2  -7   0    5.74    1.11
  -2   7   0    4.60    0.68
  -2   7   0    4.68    0.78
   1  -7   0    0.37    0.50
   1  -7   0   -0.42    0.40
   1  -7   0   -0.28    0.18
   1  -7   0    0.69    0.73
  -1   7   0    0.70    0.44
  -1   7   0    1.07    0.53
   0  -7   0   30.00    1.39
   0  -7   0   29.01    1.23
   0  -7   0   30.83    1.47
   0   7   0   33.91    2.36
   0   7   0   31.95    1.40
   0   7   0   28.37    1.36
  -1  -7   0    5.16    0.61
  -1  -7   0    5.01    0.69
  -1  -7   0    5.38    0.76
   1   7   0    4.21    0.58
   1   7   0    4.11    1.29
   1   7   0    6.09    0.75
  -2  -7   0    8.53    0.84
  -2  -7   0    9.82    0.87
  -2  -7   0    9.70    0.68
   2   7   0    9.67    0.82
   2   7   0   11.02    0.96
   2   7   0   10.89    1.72
   2   7   0    9.96    0.99
  -3  -7   0    0.04    0.34
  -3  -7   0   -0.08    0.40
  -3  -7   0    0.61    0.31
   3   7   0    0.54    0.52
   3   7   0    0.27    0.35
   3   7   0    0.55    0.78
   3   7   0    0.00    0.89
  -4  -7   0    5.20    0.68
  -4  -7   0    6.00    0.65
  -4  -7   0    5.77    0.51
   4   7   0    4.77    0.68
   4   7   0    3.90    0.74
   4   7   0    4.53    1.03
   4   7   0    4.72    1.36
   4   7   0    6.58    1.25
  -5  -7   0    1.73    0.52
   5   7   0    0.93    1.08
   5   7   0    2.01    0.85
   5   7   0    1.93    0.54
   5   7   0    1.87    0.67
   5   7   0    2.05    0.92
   6   7   0    2.30    1.05
   6   7   0    1.56    1.21
   6   7   0    3.93    1.04
   6   7   0    3.84    0.80
   7   7   0    2.51    1.07
   7   7   0    3.48    0.84
   7   7   0    5.71    1.59
   8   7   0   15.78    1.46
   8   7   0   14.20    2.34
   8   7   0   12.55    1.69
   9   7   0    2.24    0.87
   9   7   0    1.67    1.01
   9   7   0    1.98    1.39
  10   7   0    0.32    1.37
  10   7   0    1.34    0.90
  10   7   0    1.92    1.08
  11   7   0    8.04    1.59
  11   7   0    9.92    1.51
  11   7   0    9.15    2.23
  12   7   0   10.76    1.72
  12   7   0    8.54    1.57
   8  -8   0   -0.04    0.85
   7  -8   0    7.35    1.21
   6  -8   0    2.67    0.92
   5  -8   0    2.89    0.87
  -5   8   0    4.35    0.76
  -5   8   0    2.90    0.58
  -5   8   0    3.94    0.52
   4  -8   0   23.44    1.59
   4  -8   0   21.25    1.46
  -4   8   0   24.77    1.45
  -4   8   0   23.44    1.26
   3  -8   0   12.81    1.25
   3  -8   0   11.84    1.11
  -3   8   0   13.39    1.06
  -3   8   0   13.36    1.19
   2  -8   0    0.73    0.57
   2  -8   0    1.81    0.66
   2  -8   0    1.17    0.58
  -2   8   0    1.29    0.65
  -2   8   0    1.31    0.53
   1  -8   0    2.07    0.68
   1  -8   0    2.79    0.60
   1  -8   0    2.79    0.65
  -1   8   0    2.07    0.63
  -1   8   0    1.98    0.68
  -1   8   0    1.93    1.26
   0  -8   0   18.66    1.10
   0  -8   0   20.54    1.26
   0  -8   0   17.57    1.29
   0   8   0   21.23    1.39
   0   8   0   18.00    2.15
   0   8   0   20.26    1.37
  -1  -8   0   24.43    1.35
  -1  -8   0   25.06    1.16
  -1  -8   0   25.06    1.39
   1   8   0   26.67    2.45
   1   8   0   18.02    1.24
   1   8   0   23.80    1.29
  -2  -8   0   10.77    1.01
  -2  -8   0   11.08    0.79
  -2  -8   0    9.31    0.95
   2   8   0   10.79    1.85
   2   8   0   11.20    1.00
   2   8   0   11.37    1.12
  -3  -8   0   43.82    1.75
  -3  -8   0   45.19    1.44
  -3  -8   0   43.81    1.68
   3   8   0   50.01    3.14
   3   8   0   43.77    1.79
   3   8   0   44.23    1.94
   3   8   0   43.41    2.48
  -4  -8   0    4.82    0.80
  -4  -8   0    5.82    0.55
  -4  -8   0    3.96    0.63
   4   8   0    6.09    1.34
   4   8   0    6.22    1.23
   4   8   0    7.20    1.70
   4   8   0    6.62    0.93
   5   8   0    0.22    1.07
   5   8   0    1.57    0.88
   5   8   0    0.32    0.65
   5   8   0    0.27    0.96
   6   8   0    7.90    1.14
   6   8   0    7.07    1.51
   6   8   0    5.45    1.14
   6   8   0    7.31    1.85
   7   8   0    2.13    1.47
   7   8   0    3.63    0.95
   7   8   0    2.00    0.97
   7   8   0    1.95    1.13
   8   8   0    8.88    2.07
   8   8   0   17.42    1.63
   8   8   0   12.59    1.84
   9   8   0   -0.11    1.18
   9   8   0    1.10    1.02
   9   8   0   -1.21    0.76
  10   8   0    0.14    1.38
  10   8   0    0.65    1.09
  10   8   0    0.01    0.94
  11   8   0    1.90    1.70
  11   8   0   -0.46    1.11
  11   8   0    5.23    1.29
  12   8   0    5.81    1.54
  12   8   0    6.91    1.49
   7  -9   0    3.91    1.12
   6  -9   0    2.17    0.88
   5  -9   0    0.76    0.77
  -5   9   0    0.15    0.46
   4  -9   0   12.14    1.25
  -4   9   0    9.70    1.00
  -4   9   0   13.79    1.26
   3  -9   0    0.27    0.63
  -3   9   0    1.53    0.76
   2  -9   0    0.23    0.55
  -2   9   0   -0.26    0.61
   1  -9   0   30.23    1.75
   1  -9   0   33.79    1.58
  -1   9   0   29.69    2.56
  -1   9   0   31.30    1.76
   0  -9   0   44.36    1.75
   0  -9   0   42.00    1.95
   0   9   0   45.03    2.06
   0   9   0   41.55    2.92
  -1  -9   0    8.03    0.84
  -1  -9   0    6.88    0.93
   1   9   0    9.69    1.82
   1   9   0    7.21    1.02
  -2  -9   0   21.38    1.37
  -2  -9   0   22.37    1.13
   2   9   0   24.82    2.63
   2   9   0   20.08    1.49
  -3  -9   0   25.09    1.38
  -3  -9   0   23.05    1.09
   3   9   0   18.67    2.44
   3   9   0   26.53    2.14
   3   9   0   23.45    2.46
   3   9   0   23.97    1.61
  -4  -9   0    0.82    0.40
  -4  -9   0   -0.20    0.47
   4   9   0    0.42    0.68
   4   9   0   -0.17    1.06
   4   9   0    0.05    0.84
   4   9   0    0.35    0.93
   5   9   0    0.91    1.25
   5   9   0    0.43    0.66
   5   9   0   -0.84    0.99
   5   9   0    0.21    0.79
   6   9   0   13.64    1.67
   6   9   0   17.42    1.62
   6   9   0   16.32    2.12
   6   9   0   21.40    2.75
   7   9   0    3.99    1.69
   7   9   0    2.36    0.93
   7   9   0    1.33    1.23
   8   9   0    4.35    1.70
   8   9   0    3.07    1.00
   8   9   0    4.17    1.47
   9   9   0    0.10    0.82
   9   9   0   -0.24    1.06
   9   9   0    2.01    1.48
  10   9   0    2.31    1.32
  10   9   0    1.15    1.63
  10   9   0    1.05    1.05
  11   9   0    4.98    1.50
  11   9   0    6.34    1.49
  11   9   0    4.00    1.91
   6 -10   0   -0.02    0.81
   5 -10   0    0.75    0.87
   4 -10   0    0.87    0.83
  -4  10   0    1.02    0.72
   3 -10   0   -0.37    0.64
  -3  10   0    1.00    0.81
   2 -10   0    2.86    0.78
  -2  10   0    2.89    0.90
   1 -10   0   17.33    1.32
   1 -10   0   15.23    1.49
  -1  10   0   14.49    1.44
   0 -10   0    0.99    0.73
   0 -10   0   -0.71    0.52
   0  10   0    0.31    1.19
   0  10   0   -0.29    0.68
  -1 -10   0   18.58    1.47
  -1 -10   0   19.40    1.21
   1  10   0   19.72    1.59
   1  10   0   23.00    2.63
  -2 -10   0   36.97    1.52
  -2 -10   0   35.87    1.80
   2  10   0   37.35    2.99
   2  10   0   33.10    1.93
  -3 -10   0    1.21    0.66
  -3 -10   0    0.55    0.48
   3  10   0    0.10    1.26
   3  10   0    0.38    0.75
   3  10   0    1.11    1.14
  -4 -10   0    1.02    0.42
  -4 -10   0    0.60    0.56
   4  10   0    0.53    1.16
   4  10   0   -0.27    0.69
   4  10   0    1.32    1.41
   5  10   0   12.04    2.30
   5  10   0   15.93    1.63
   5  10   0   11.26    1.92
   6  10   0    2.61    1.27
   6  10   0    1.18    0.87
   6  10   0    4.38    1.64
   7  10   0    0.03    1.26
   7  10   0   -0.09    1.18
   7  10   0   -1.04    0.73
   8  10   0    2.96    1.75
   8  10   0    2.04    1.32
   8  10   0    2.05    1.07
   9  10   0   13.18    2.20
   9  10   0   11.44    2.40
   9  10   0   12.56    1.72
  10  10   0    2.31    1.72
  10  10   0    1.88    1.17
  10  10   0    0.50    1.29
  11  10   0    1.40    1.27
   5 -11   0    0.04    0.83
   4 -11   0    0.44    0.82
   3 -11   0   -0.26    0.75
  -3  11   0    1.13    0.87
   2 -11   0    8.70    1.15
  -2  11   0    9.68    1.34
   1 -11   0    2.71    0.82
  -1  11   0    1.05    0.90
   0 -11   0    6.57    1.17
   0 -11   0    6.71    0.93
   0  11   0    7.22    1.22
  -1 -11   0   46.18    2.24
  -1 -11   0   49.60    1.94
   1  11   0   46.55    2.41
   1  11   0   51.27    3.38
  -2 -11   0    2.05    0.66
  -2 -11   0    1.16    0.75
   2  11   0    2.48    0.89
   2  11   0    1.87    1.35
  -3 -11   0    0.09    0.69
  -3 -11   0    0.20    0.51
   3  11   0    5.00    1.67
   3  11   0    0.65    0.85
  -4 -11   0   11.24    0.92
  -4 -11   0    9.02    1.05
   4  11   0   11.30    2.23
   4  11   0   11.83    1.49
   5  11   0    6.77    1.97
   5  11   0    6.28    1.21
   6  11   0   -0.09    0.84
   6  11   0    1.50    1.61
   7  11   0    6.63    2.05
   7  11   0    4.08    1.19
   8  11   0    6.94    2.23
   8  11   0    8.90    1.54
   9  11   0    1.08    1.15
   9  11   0    1.99    1.67
  10  11   0    3.42    1.39
   4 -12   0    0.90    0.95
   3 -12   0    2.24    0.93
  -3  12   0    3.67    1.08
   2 -12   0    0.42    0.79
  -2  12   0   -0.49    0.87
   1 -12   0    2.20    0.86
  -1  12   0    3.12    1.07
   0 -12   0   11.41    1.19
   0 -12   0   12.68    1.50
   0  12   0    7.47    1.33
  -1 -12   0   22.79    1.81
  -1 -12   0   23.95    1.54
   1  12   0   20.06    1.90
  -2 -12   0    1.40    0.67
  -2 -12   0   -0.84    0.67
   2  12   0    0.32    0.94
  -3 -12   0    0.63    0.75
  -3 -12   0    0.18    0.56
   3  12   0   -0.05    0.84
   3  12   0    1.05    1.37
  -4 -12   0   11.03    1.15
  -4 -12   0   10.73    0.92
   4  12   0   11.27    2.29
   4  12   0   10.31    1.52
   5  12   0    1.39    1.57
   5  12   0    1.24    1.02
   6  12   0    3.33    1.79
   6  12   0    4.14    1.32
   7  12   0   14.76    1.86
   7  12   0    9.72    2.39
   8  12   0    0.49    1.09
   8  12   0   -0.51    1.76
   9  12   0    4.06    1.35
   9  12   0    3.61    2.06
   2 -13   0    0.57    0.84
  -2  13   0    0.48    0.99
   1 -13   0    0.27    0.74
  -1  13   0    2.01    1.08
   0 -13   0    8.82    1.14
   0  13   0    6.08    1.34
  -1 -13   0   -0.76    0.82
  -1 -13   0    0.40    0.71
   1  13   0    0.10    0.96
  -2 -13   0    0.70    0.93
  -2 -13   0    0.53    0.66
   2  13   0   -0.28    0.98
  -3 -13   0   13.89    1.45
  -3 -13   0   15.41    1.23
   3  13   0   11.26    1.73
  -4 -13   0    3.71    0.93
   4  13   0    5.87    1.36
   5  13   0    4.02    1.92
   5  13   0    2.17    1.20
   6  13   0    5.05    2.10
   6  13   0    3.25    1.33
   7  13   0    2.94    1.86
   7  13   0    3.05    1.33
   8  13   0    2.67    1.96
   1  14   0   -0.86    1.00
  -2 -14   0    2.95    1.13
  -2 -14   0    2.70    0.86
   2  14   0    2.87    1.27
  -3 -14   0    8.47    1.33
   3  14   0    8.40    1.70
  -4 -14   0    0.14    0.79
   4  14   0   -0.69    1.10
   5  14   0    4.60    1.52
   5  14  -1    5.13    1.56
   4  14  -1   -0.15    1.14
  -4 -14   1    0.06    0.80
   3  14  -1   -0.20    1.07
  -3 -14   1    0.21    0.70
  -3 -14   1    0.35    0.89
   2  14  -1   13.60    1.80
  -2 -14   1   13.39    1.29
  -2 -14   1   11.53    1.49
   7  13  -1    5.29    1.41
   7  13  -1    4.56    2.02
   6  13  -1    4.76    2.03
   6  13  -1    3.24    1.36
   5  13  -1    3.72    1.31
   5  13  -1    4.31    1.80
  -5 -13   1    1.83    0.80
   4  13  -1    0.44    1.04
  -4 -13   1    0.86    0.80
  -4 -13   1    0.88    0.64
   3  13  -1    4.48    1.28
  -3 -13   1    6.35    1.19
  -3 -13   1    5.78    0.90
   2  13  -1    9.06    1.44
  -2 -13   1    9.57    1.10
  -2 -13   1    9.35    1.36
   1  13  -1    0.15    0.94
  -1 -13   1    0.51    0.77
  -1 -13   1    1.77    1.06
   0  13  -1   -0.74    0.89
   0 -13   1    0.33    0.76
  -1  13  -1   18.03    1.77
   1 -13   1   18.30    1.62
  -2  13  -1    0.34    1.04
   2 -13   1    0.32    0.83
   9  12  -1   -1.28    1.06
   9  12  -1    1.24    1.68
   8  12  -1   -0.34    1.06
   8  12  -1    2.16    1.75
   7  12  -1   -0.58    1.42
   7  12  -1    0.93    1.07
   6  12  -1    3.01    1.19
   6  12  -1    5.16    1.85
   5  12  -1    0.81    1.50
   5  12  -1   -1.62    0.82
  -5 -12   1    0.34    0.66
   4  12  -1    5.09    1.23
   4  12  -1    3.71    1.61
  -4 -12   1    5.01    1.02
  -4 -12   1    4.86    0.75
   3  12  -1    1.68    1.52
   3  12  -1    1.21    0.94
  -3 -12   1   -0.02    0.73
  -3 -12   1    0.29    0.57
   2  12  -1    2.47    1.07
  -2 -12   1    0.82    0.78
  -2 -12   1    1.03    0.70
   1  12  -1    9.31    1.41
  -1 -12   1    6.73    1.03
  -1 -12   1    6.93    1.21
   0  12  -1    0.76    0.91
   0 -12   1   -0.06    0.64
  -1  12  -1    0.18    0.88
   1 -12   1   -0.16    0.79
  -2  12  -1    0.11    0.87
   2 -12   1    1.83    0.82
   3 -12   1    2.02    0.90
  10  11  -1    1.20    1.22
   9  11  -1    3.88    1.32
   9  11  -1    9.65    2.31
   8  11  -1    2.77    1.65
   8  11  -1    4.20    1.27
   7  11  -1    3.47    1.82
   7  11  -1    3.18    1.16
   6  11  -1   -1.57    1.19
   6  11  -1    1.86    1.06
   5  11  -1    1.92    1.52
   5  11  -1    2.89    1.04
  -5 -11   1    2.05    0.70
  -5 -11   1    2.17    0.53
   4  11  -1    3.49    0.98
   4  11  -1    4.36    1.62
  -4 -11   1    2.72    0.82
  -4 -11   1    1.78    0.58
   3  11  -1    0.41    1.22
   3  11  -1    0.42    0.78
  -3 -11   1    0.59    0.56
  -3 -11   1   -0.24    0.68
   2  11  -1    6.20    1.62
   2  11  -1    4.30    1.07
  -2 -11   1    6.95    1.13
  -2 -11   1    5.31    0.81
   1  11  -1   18.95    1.75
  -1 -11   1   25.02    1.44
  -1 -11   1   24.80    1.76
   0  11  -1    4.39    1.03
   0 -11   1    5.41    0.91
  -1  11  -1    0.46    0.86
   1 -11   1   -0.20    0.67
  -2  11  -1    1.59    0.85
   2 -11   1    0.92    0.74
  -3  11  -1    0.88    0.76
   3 -11   1    1.53    0.85
   4 -11   1    1.57    0.92
   5 -11   1    0.76    0.96
  11  10  -1    1.50    1.25
  10  10  -1   -0.80    1.02
  10  10  -1   -0.66    1.51
   9  10  -1   20.85    2.08
   9  10  -1   19.50    2.94
   8  10  -1    6.67    1.31
   8  10  -1    3.90    1.47
   8  10  -1    1.70    1.52
   7  10  -1    0.80    1.29
   7  10  -1    0.73    0.92
   7  10  -1    0.79    1.19
   6  10  -1   12.53    2.24
   6  10  -1   11.25    1.45
   6  10  -1   14.00    2.22
   5  10  -1    8.95    1.74
   5  10  -1   11.23    1.40
   5  10  -1    9.36    2.01
  -5 -10   1   11.53    1.05
  -5 -10   1   10.64    0.81
   4  10  -1    5.01    1.06
   4  10  -1    3.62    1.50
   4  10  -1    1.42    1.25
  -4 -10   1    1.79    0.67
  -4 -10   1    3.09    0.58
   3  10  -1    1.26    0.82
   3  10  -1    1.47    1.22
  -3 -10   1    2.75    0.79
  -3 -10   1    3.57    0.62
   2  10  -1   16.04    2.11
   2  10  -1   13.22    1.42
  -2 -10   1   13.34    1.06
  -2 -10   1   13.70    1.32
   1  10  -1   34.39    2.59
   1  10  -1   32.06    1.92
  -1 -10   1   33.99    1.54
  -1 -10   1   32.79    1.84
   0  10  -1    1.96    0.82
   0 -10   1    2.33    0.70
   0 -10   1    2.84    0.87
  -1  10  -1   -0.73    0.68
   1 -10   1   -0.11    0.54
  -2  10  -1   -0.09    0.71
   2 -10   1    0.13    0.62
  -3  10  -1    4.76    0.91
   3 -10   1    5.58    0.98
  -4  10  -1    0.24    0.52
   4 -10   1    0.30    0.83
   5 -10   1    0.44    0.90
   6 -10   1    5.63    1.20
  11   9  -1    0.88    1.17
  11   9  -1    1.43    1.44
  10   9  -1   18.04    2.31
  10   9  -1   17.97    2.87
  10   9  -1   22.38    2.13
   9   9  -1    3.04    1.07
   9   9  -1    4.93    1.84
   9   9  -1    4.28    1.40
   8   9  -1    2.52    1.00
   8   9  -1    3.91    1.61
   8   9  -1    3.12    1.33
   7   9  -1   22.48    1.81
   7   9  -1   21.12    2.46
   7   9  -1   23.22    2.89
   6   9  -1   15.84    2.42
   6   9  -1   13.58    1.98
   6   9  -1   18.51    1.61
   5   9  -1    0.40    0.80
   5   9  -1    0.16    1.08
   5   9  -1   -0.71    0.65
   5   9  -1    0.20    1.03
  -5  -9   1    0.10    0.48
  -5  -9   1   -0.28    0.35
   4   9  -1   14.78    2.18
   4   9  -1   15.77    1.45
   4   9  -1   15.68    1.66
   4   9  -1   17.29    2.16
  -4  -9   1   14.93    1.22
  -4  -9   1   15.43    0.92
   3   9  -1   10.59    1.21
   3   9  -1   13.02    1.61
   3   9  -1   11.21    1.83
   3   9  -1    9.21    1.73
  -3  -9   1   11.12    0.88
  -3  -9   1   12.81    1.18
   2   9  -1    0.77    1.10
   2   9  -1    0.20    0.59
   2   9  -1   -0.84    0.69
  -2  -9   1    0.14    0.41
  -2  -9   1    0.81    0.64
   1   9  -1    9.77    1.19
   1   9  -1   11.19    1.69
  -1  -9   1   13.76    1.26
  -1  -9   1   12.24    0.99
   0   9  -1   16.39    1.43
   0   9  -1   15.32    1.91
   0  -9   1   15.84    1.27
   0  -9   1   15.36    1.13
   0  -9   1   14.56    1.38
  -1   9  -1    9.71    1.55
  -1   9  -1    8.38    1.12
   1  -9   1    8.36    0.95
   1  -9   1   12.39    1.30
   1  -9   1    9.78    1.13
  -2   9  -1    4.50    0.90
   2  -9   1    3.92    0.79
   2  -9   1    4.89    0.99
  -3   9  -1    2.56    0.81
  -3   9  -1    3.54    0.71
   3  -9   1    3.81    0.89
  -4   9  -1    4.44    0.81
  -4   9  -1    2.91    0.61
   4  -9   1    3.94    0.90
   5  -9   1    5.10    1.06
   6  -9   1    4.58    1.04
   7  -9   1    0.81    0.89
  12   8  -1    0.61    1.14
  11   8  -1    4.80    1.46
  11   8  -1    7.69    1.48
  11   8  -1    4.53    1.82
  10   8  -1    1.05    1.37
  10   8  -1    4.45    1.21
  10   8  -1    2.91    1.41
   9   8  -1    1.09    0.91
   9   8  -1    1.31    1.29
   9   8  -1    1.33    1.04
   8   8  -1    0.01    1.19
   8   8  -1    1.26    0.82
   8   8  -1    0.56    0.98
   7   8  -1   15.48    2.37
   7   8  -1   18.66    2.14
   7   8  -1   18.11    1.61
   6   8  -1    6.53    1.06
   6   8  -1    2.70    1.09
   6   8  -1    3.85    1.52
   6   8  -1    2.67    0.92
   5   8  -1    0.11    0.62
   5   8  -1    1.41    1.13
   5   8  -1   -0.55    0.82
   5   8  -1   -0.87    0.61
  -5  -8   1    0.42    0.33
  -5  -8   1    1.04    0.47
   4   8  -1   79.62    2.72
   4   8  -1   79.29    3.07
   4   8  -1   74.76    3.76
   4   8  -1   82.36    3.69
  -4  -8   1   71.01    2.30
  -4  -8   1   78.13    2.70
  -4  -8   1   77.13    2.05
   3   8  -1    9.10    1.07
   3   8  -1    7.56    0.87
   3   8  -1    5.70    1.25
   3   8  -1    8.83    1.29
   3   8  -1    4.87    1.40
  -3  -8   1    7.15    0.89
  -3  -8   1    7.95    0.72
  -3  -8   1    7.17    0.85
   2   8  -1    0.55    0.98
   2   8  -1    0.02    0.37
   2   8  -1   -0.56    0.55
   2   8  -1   -1.11    0.41
  -2  -8   1    0.19    0.36
  -2  -8   1    0.16    0.46
  -2  -8   1   -0.01    0.50
   1   8  -1   71.51    2.49
   1   8  -1   71.13    2.32
   1   8  -1   77.64    3.49
  -1  -8   1   75.34    2.20
  -1  -8   1   77.73    2.50
  -1  -8   1   77.70    2.53
   0   8  -1    2.75    0.62
   0   8  -1    3.75    0.78
   0   8  -1    2.82    1.10
   0  -8   1    3.05    0.59
   0  -8   1    3.09    0.73
   0  -8   1    2.18    0.62
  -1   8  -1    3.18    0.73
  -1   8  -1    0.99    0.93
  -1   8  -1    1.99    0.57
   1  -8   1    3.49    0.66
   1  -8   1    2.46    0.77
   1  -8   1    1.90    0.60
  -2   8  -1    0.38    0.57
  -2   8  -1   -0.09    0.43
  -2   8  -1    1.82    0.94
   2  -8   1   -0.37    0.51
   2  -8   1   -0.04    0.53
  -3   8  -1    4.12    0.83
  -3   8  -1    4.92    0.71
   3  -8   1    6.02    0.89
   3  -8   1    6.79    0.99
  -4   8  -1   16.42    0.99
  -4   8  -1   15.05    1.16
   4  -8   1   15.67    1.46
   4  -8   1   12.94    1.24
   5  -8   1    1.34    0.75
   5  -8   1    1.86    0.78
   6  -8   1    2.34    0.93
   7  -8   1   -0.71    0.79
   8  -8   1    9.42    1.40
  12   7  -1    8.10    1.67
  12   7  -1    7.47    1.53
  11   7  -1   11.05    1.57
  11   7  -1    6.94    1.97
  11   7  -1    5.94    1.44
  10   7  -1    4.02    1.62
  10   7  -1    2.60    1.19
  10   7  -1    5.31    1.19
   9   7  -1    0.61    0.80
   9   7  -1   -0.51    1.01
   9   7  -1   -0.36    0.87
  -9  -7   1   -1.24    1.06
   8   7  -1   10.86    1.30
   8   7  -1   10.37    2.04
   8   7  -1    9.36    1.50
   7   7  -1    6.07    0.97
   7   7  -1    5.51    1.32
   7   7  -1    6.36    1.61
   6   7  -1    4.30    1.41
   6   7  -1    5.26    0.91
   6   7  -1    5.12    1.02
   6   7  -1    6.30    1.32
   5   7  -1   16.45    2.14
   5   7  -1   15.49    1.26
   5   7  -1   13.19    1.02
   5   7  -1   15.16    1.50
   5   7  -1   16.40    1.78
  -5  -7   1   15.58    0.73
  -5  -7   1   15.40    0.92
  -5  -7   1   13.30    1.03
   4   7  -1   40.57    1.81
   4   7  -1   43.70    1.72
   4   7  -1   44.70    2.15
   4   7  -1   42.09    2.53
   4   7  -1   45.73    2.79
  -4  -7   1   44.63    1.72
  -4  -7   1   44.88    1.59
  -4  -7   1   43.25    1.33
   3   7  -1    9.41    1.54
   3   7  -1    8.77    0.86
   3   7  -1    8.36    0.96
   3   7  -1    8.50    1.43
  -3  -7   1    9.07    0.88
  -3  -7   1    9.86    0.85
  -3  -7   1    8.78    0.66
   2   7  -1   20.08    1.91
   2   7  -1   16.61    1.00
   2   7  -1   17.83    1.89
   2   7  -1   17.59    1.04
   2   7  -1   13.55    1.06
  -2  -7   1   19.26    1.10
  -2  -7   1   20.76    1.16
  -2  -7   1   16.89    0.88
   1   7  -1   27.50    2.05
   1   7  -1   24.23    1.20
   1   7  -1   26.21    1.25
  -1  -7   1   26.02    1.30
  -1  -7   1   25.48    1.15
  -1  -7   1   25.09    1.31
   0   7  -1    1.74    0.57
   0   7  -1    2.37    0.53
   0   7  -1   -0.57    0.70
   0  -7   1    2.42    0.56
   0  -7   1    2.15    0.86
   0  -7   1    1.59    0.56
  -1   7  -1    1.29    0.85
  -1   7  -1    0.60    0.42
  -1   7  -1    1.35    0.56
   1  -7   1    0.88    0.75
   1  -7   1    1.21    0.54
   1  -7   1   -0.29    0.28
   1  -7   1    1.98    0.53
  -2   7  -1   16.27    1.15
  -2   7  -1   15.66    0.88
  -2   7  -1   17.42    1.03
   2  -7   1   13.07    1.20
   2  -7   1   13.56    1.60
   2  -7   1   13.41    1.12
   2  -7   1   14.76    1.08
  -3   7  -1    0.68    0.41
  -3   7  -1    0.82    0.56
   3  -7   1    0.09    0.54
   3  -7   1    0.38    0.55
  -4   7  -1   -0.17    0.50
  -4   7  -1   -0.33    0.37
   4  -7   1    0.34    0.58
   4  -7   1   -0.28    0.56
   5  -7   1    5.09    0.96
   5  -7   1    4.53    0.85
   6  -7   1    8.93    1.22
   6  -7   1    8.42    1.13
   7  -7   1   -0.80    0.71
   7  -7   1   -0.28    0.75
   8  -7   1    1.11    0.88
   9  -7   1    3.16    1.08
  12   6  -1   12.82    1.82
  12   6  -1   12.12    2.48
  12   6  -1   13.70    1.70
  11   6  -1    0.02    1.24
  11   6  -1    0.44    0.91
  11   6  -1    0.55    0.90
  10   6  -1    5.02    1.66
  10   6  -1    4.87    1.08
  10   6  -1    3.19    1.07
   9   6  -1   21.11    2.55
   9   6  -1   19.44    1.91
   9   6  -1   19.36    1.68
  -9  -6   1   16.69    2.45
   8   6  -1    4.87    0.96
   8   6  -1    6.37    1.50
   8   6  -1    5.25    1.20
  -8  -6   1    7.07    1.62
   7   6  -1    4.44    1.08
   7   6  -1    5.78    1.54
   7   6  -1    6.31    0.95
  -7  -6   1    6.25    1.47
   6   6  -1    4.57    0.79
   6   6  -1    5.03    1.30
   6   6  -1    5.98    0.76
   6   6  -1    3.87    1.03
  -6  -6   1    3.56    0.61
   5   6  -1   11.22    1.06
   5   6  -1   12.45    1.30
   5   6  -1   11.88    1.47
   5   6  -1   11.97    0.90
   5   6  -1    9.60    1.62
  -5  -6   1   11.80    0.91
  -5  -6   1   11.71    0.60
  -5  -6   1   12.44    0.77
   4   6  -1   18.21    1.05
   4   6  -1   22.77    1.97
   4   6  -1   19.36    1.41
   4   6  -1   21.09    1.21
   4   6  -1   20.67    1.89
  -4  -6   1   20.86    1.00
  -4  -6   1   21.29    0.82
  -4  -6   1   18.92    1.07
   3   6  -1    6.16    0.80
   3   6  -1    5.99    0.69
   3   6  -1    7.17    1.30
   3   6  -1    7.88    1.01
  -3  -6   1    6.38    0.69
  -3  -6   1    7.00    0.71
  -3  -6   1    7.14    0.59
   2   6  -1   72.12    2.94
   2   6  -1   75.08    2.16
   2   6  -1   68.52    2.18
   2   6  -1   70.78    2.06
   2   6  -1   71.83    3.10
  -2  -6   1   67.19    1.83
  -2  -6   1   74.41    2.15
  -2  -6   1   74.41    2.13
   1   6  -1   11.16    0.78
   1   6  -1   11.77    0.80
  -1  -6   1   11.28    0.87
  -1  -6   1   11.23    1.35
  -1  -6   1   10.70    0.84
  -1  -6   1   12.14    0.75
   0   6  -1    0.65    0.38
   0   6  -1    1.02    0.37
   0   6  -1    0.45    0.76
   0   6  -1    1.17    0.47
   0  -6   1    1.31    0.74
   0  -6   1    0.81    0.46
   0  -6   1    1.03    0.33
   0  -6   1    0.45    0.38
  -1   6  -1    5.70    0.70
  -1   6  -1    4.02    0.94
  -1   6  -1    4.02    0.56
   1  -6   1    5.89    0.72
   1  -6   1    5.07    0.66
   1  -6   1    4.32    1.00
   1  -6   1    4.76    0.64
  -2   6  -1   38.74    1.43
  -2   6  -1   37.80    1.53
  -2   6  -1   38.79    1.33
   2  -6   1   41.54    1.53
   2  -6   1   41.77    1.63
   2  -6   1   41.64    1.66
   2  -6   1   37.86    2.19
  -3   6  -1    2.31    0.47
  -3   6  -1    2.12    0.47
  -3   6  -1    2.17    0.56
   3  -6   1    1.75    0.87
   3  -6   1    3.54    0.65
   3  -6   1    2.99    0.60
   3  -6   1    2.24    0.64
  -4   6  -1    0.43    0.30
  -4   6  -1    0.77    0.38
  -4   6  -1    0.75    0.48
   4  -6   1    0.84    0.55
   4  -6   1    0.01    0.48
   5  -6   1   15.23    1.30
   5  -6   1   14.42    1.23
   6  -6   1    3.72    0.84
   6  -6   1    2.95    0.84
   7  -6   1   -0.80    0.66
   7  -6   1    0.40    0.69
   8  -6   1    3.66    1.01
   8  -6   1    2.01    0.84
   9  -6   1    7.10    1.23
  10  -6   1    2.31    1.04
  12   5  -1    1.98    1.11
  12   5  -1    3.28    1.57
  12   5  -1    2.14    1.09
  11   5  -1   -0.95    0.79
  11   5  -1    2.01    1.34
  11   5  -1    0.60    0.90
  10   5  -1    0.68    1.17
  10   5  -1    3.86    1.03
  10   5  -1    1.60    0.89
   9   5  -1   25.44    1.67
   9   5  -1   22.57    2.55
   9   5  -1   23.88    1.88
  -9  -5   1   19.27    2.58
   8   5  -1    7.20    1.18
   8   5  -1    5.70    0.97
   8   5  -1    7.87    1.57
  -8  -5   1    3.35    1.41
   7   5  -1   13.51    1.43
   7   5  -1   14.46    1.99
   7   5  -1   13.24    1.20
   7   5  -1   12.87    1.06
  -7  -5   1   15.14    1.97
  -7  -5   1   11.67    1.06
   6   5  -1   28.10    1.41
   6   5  -1   29.98    1.38
   6   5  -1   27.85    1.80
  -6  -5   1   28.46    2.23
  -6  -5   1   27.98    1.33
   5   5  -1    6.74    0.80
   5   5  -1    6.23    1.30
   5   5  -1    6.06    1.00
   5   5  -1    6.97    0.96
   5   5  -1    7.55    0.78
  -5  -5   1    5.45    0.48
  -5  -5   1    6.36    0.44
  -5  -5   1    6.70    0.56
  -5  -5   1    6.44    1.21
  -5  -5   1    7.17    0.72
   4   5  -1    4.54    0.88
   4   5  -1    1.95    0.61
   4   5  -1    5.16    1.16
   4   5  -1    5.16    0.68
   4   5  -1    3.68    0.53
  -4  -5   1    4.23    0.52
  -4  -5   1    4.76    0.43
  -4  -5   1    4.38    0.58
   3   5  -1    1.35    0.39
   3   5  -1    0.40    0.42
   3   5  -1    1.96    0.86
   3   5  -1    0.12    0.51
   3   5  -1    0.56    0.51
  -3  -5   1    0.94    0.28
  -3  -5   1    1.72    0.42
  -3  -5   1    0.98    0.38
   2   5  -1  144.06    3.30
   2   5  -1  146.07    4.55
   2   5  -1  152.21    4.33
   2   5  -1  142.80    3.97
   2   5  -1  141.33    3.42
   2   5  -1  145.12    3.44
  -2  -5   1  145.38    3.34
  -2  -5   1  141.71    3.11
  -2  -5   1  145.26    3.44
   1   5  -1    0.98    0.42
   1   5  -1    1.77    0.39
   1   5  -1    1.08    0.78
   1   5  -1    2.27    0.43
  -1  -5   1    1.96    0.38
  -1  -5   1    2.06    0.49
  -1  -5   1    2.02    0.44
   0   5  -1   12.29    0.85
   0   5  -1   14.60    1.40
   0   5  -1   13.01    0.77
   0   5  -1   11.95    0.77
   0  -5   1   13.60    0.76
   0  -5   1   13.55    0.84
   0  -5   1   12.93    0.87
   0  -5   1   12.26    1.32
  -1   5  -1   83.32    2.31
  -1   5  -1   87.95    2.33
  -1   5  -1   85.25    2.23
   1  -5   1   86.59    2.39
   1  -5   1   90.81    2.39
   1  -5   1   85.57    2.21
   1  -5   1   83.98    3.04
  -2   5  -1   37.89    1.29
  -2   5  -1   35.46    1.35
  -2   5  -1   36.83    1.19
   2  -5   1   34.55    1.96
   2  -5   1   35.26    1.42
   2  -5   1   37.19    1.42
   2  -5   1   35.78    1.33
  -3   5  -1    7.61    0.65
  -3   5  -1    7.43    0.69
  -3   5  -1    7.35    0.65
   3  -5   1    6.25    0.74
   3  -5   1    5.95    1.10
   3  -5   1    6.54    0.71
   3  -5   1    7.06    0.79
  -4   5  -1   31.15    1.39
  -4   5  -1   31.98    1.10
  -4   5  -1   32.72    1.21
   4  -5   1   31.94    1.51
   4  -5   1   32.86    1.42
   4  -5   1   33.78    1.53
   4  -5   1   35.10    2.08
   5  -5   1    3.03    0.67
   5  -5   1    2.98    0.68
   6  -5   1    0.64    0.58
   6  -5   1    0.43    0.58
   7  -5   1    0.17    0.61
   7  -5   1    0.67    0.65
   8  -5   1    9.58    1.22
   8  -5   1    7.62    1.14
   9  -5   1   -1.79    0.61
   9  -5   1   -0.77    0.74
  10  -5   1    1.19    0.99
  10  -5   1    2.11    0.98
  12   4  -1    9.03    1.50
  12   4  -1   12.29    2.24
  12   4  -1    7.83    1.38
  12   4  -1    8.89    1.47
  11   4  -1    2.56    1.44
  11   4  -1    2.81    0.99
  11   4  -1    6.53    1.27
  10   4  -1    5.13    1.14
  10   4  -1    4.11    1.44
  10   4  -1    6.79    1.15
   9   4  -1    1.20    1.09
   9   4  -1   -0.10    0.62
   9   4  -1    0.49    0.72
  -9  -4   1   -0.22    1.05
   8   4  -1    0.81    1.01
   8   4  -1    0.44    0.62
   8   4  -1    2.11    0.80
  -8  -4   1   -0.22    0.94
   7   4  -1    0.96    0.94
   7   4  -1    0.42    0.66
   7   4  -1    0.35    0.54
   7   4  -1    0.94    0.50
  -7  -4   1    1.19    0.54
  -7  -4   1    1.05    1.04
   6   4  -1   14.20    1.33
   6   4  -1   15.03    1.02
   6   4  -1   16.16    1.08
  -6  -4   1   17.02    1.04
  -6  -4   1   18.90    1.89
   5   4  -1    1.00    0.59
   5   4  -1    0.25    0.35
   5   4  -1   -0.17    0.40
   5   4  -1    0.18    0.66
  -5  -4   1    0.12    0.33
  -5  -4   1    1.42    0.79
   4   4  -1   -0.03    0.32
   4   4  -1    0.13    0.67
   4   4  -1    0.79    0.33
   4   4  -1    1.03    0.43
   4   4  -1    0.59    0.56
  -4  -4   1    0.74    0.35
  -4  -4   1    0.88    0.70
  -4  -4   1    0.68    0.32
  -4  -4   1    1.04    0.24
   3   4  -1   50.83    2.13
   3   4  -1   54.57    2.49
   3   4  -1   52.23    1.96
   3   4  -1   55.00    1.67
   3   4  -1   54.81    1.62
  -3  -4   1   54.05    1.62
  -3  -4   1   52.79    1.34
  -3  -4   1   52.24    1.50
   2   4  -1    8.49    0.70
   2   4  -1    8.00    0.99
   2   4  -1    7.83    0.88
   2   4  -1    8.15    0.62
   2   4  -1    8.14    0.58
  -2  -4   1    7.33    0.48
  -2  -4   1    8.78    0.64
  -2  -4   1    8.33    1.30
  -2  -4   1    8.18    0.62
   1   4  -1   20.84    0.88
   1   4  -1   21.57    0.97
   1   4  -1   19.82    1.46
  -1  -4   1   20.66    0.90
  -1  -4   1   20.74    0.91
   0   4  -1  127.62    2.85
   0   4  -1  123.55    2.94
   0  -4   1  124.89    2.97
   0  -4   1  129.25    3.63
   0  -4   1  127.30    2.79
   0  -4   1  125.86    2.93
  -1   4  -1  130.68    3.01
  -1   4  -1  131.37    2.89
  -1   4  -1  125.73    2.94
   1  -4   1  123.73    3.02
   1  -4   1  124.19    3.68
   1  -4   1  128.04    3.00
   1  -4   1  129.51    2.88
  -2   4  -1   35.59    1.11
  -2   4  -1   35.22    1.22
  -2   4  -1   34.51    1.15
   2  -4   1   33.88    1.80
   2  -4   1   34.99    1.22
   2  -4   1   35.32    1.29
  -3   4  -1   44.02    1.39
  -3   4  -1   49.57    1.54
  -3   4  -1   46.32    1.33
   3  -4   1   47.90    1.62
   3  -4   1   45.50    2.11
   3  -4   1   47.07    1.58
   3  -4   1   46.21    1.50
  -4   4  -1   27.74    1.29
   4  -4   1   23.95    1.20
   4  -4   1   23.90    1.15
   4  -4   1   26.29    1.70
   4  -4   1   24.34    1.22
   5  -4   1   11.77    1.00
   5  -4   1   13.23    0.96
   5  -4   1   11.11    1.06
   5  -4   1   10.99    1.36
   6  -4   1    0.35    0.53
   6  -4   1    1.61    0.61
   7  -4   1   43.50    1.86
   7  -4   1   42.73    1.97
   8  -4   1    1.51    0.73
   8  -4   1    1.06    0.66
   9  -4   1    2.30    0.86
   9  -4   1    2.58    0.86
  10  -4   1    6.29    1.16
  10  -4   1    6.83    1.24
  11  -4   1   -1.12    0.76
  12   3  -1    5.15    1.74
  12   3  -1    7.17    1.31
  12   3  -1    3.53    1.17
  11   3  -1    7.09    1.32
  11   3  -1    7.16    1.25
  11   3  -1    4.79    1.59
  11   3  -1    7.00    1.23
  10   3  -1    2.68    0.88
  10   3  -1    1.28    1.16
  10   3  -1    2.03    0.83
   9   3  -1    7.06    1.51
   9   3  -1    7.87    1.05
   9   3  -1    6.19    1.10
  -9  -3   1    4.98    1.52
   8   3  -1    2.42    1.12
   8   3  -1    1.80    0.74
   8   3  -1    2.22    0.73
  -8  -3   1    2.49    1.21
   7   3  -1    1.12    0.59
   7   3  -1    2.02    0.98
   7   3  -1    1.18    0.55
   7   3  -1    2.28    0.61
  -7  -3   1    1.34    0.53
  -7  -3   1    0.77    0.96
   6   3  -1    1.21    0.58
   6   3  -1    0.68    0.43
   6   3  -1    1.39    0.81
   6   3  -1    0.96    0.48
  -6  -3   1    2.29    0.92
  -6  -3   1    1.95    0.49
   5   3  -1    0.97    0.41
   5   3  -1    1.50    0.56
   5   3  -1    1.46    0.42
   5   3  -1    0.81    0.69
  -5  -3   1    1.26    0.42
  -5  -3   1    2.05    0.84
   4   3  -1   24.92    1.07
   4   3  -1   25.10    1.06
  -4  -3   1   24.89    1.57
  -4  -3   1   24.04    0.86
  -4  -3   1   22.76    0.72
  -4  -3   1   22.17    0.82
  -4  -3   1   22.92    1.02
  -4  -3   1   24.03    0.83
   3   3  -1   -0.09    0.32
   3   3  -1    0.08    0.39
   3   3  -1    0.57    0.48
   3   3  -1    0.40    0.29
   3   3  -1    0.05    0.46
  -3  -3   1   -0.18    0.29
  -3  -3   1   -0.30    0.50
  -3  -3   1   -0.32    0.23
  -3  -3   1    0.02    0.17
   2   3  -1    9.88    0.67
   2   3  -1   10.23    1.10
   2   3  -1   11.17    0.84
   2   3  -1    9.04    0.95
   2   3  -1    8.81    0.55
   2   3  -1    9.07    0.58
  -2  -3   1    9.23    0.60
  -2  -3   1    9.52    0.46
  -2  -3   1    9.06    0.56
  -2  -3   1   10.40    1.25
   1   3  -1  278.84    6.46
   1   3  -1  266.62    5.26
   1   3  -1  275.36    5.52
   1   3  -1  278.31    5.36
   1   3  -1  262.27    6.07
  -1  -3   1  256.12    6.56
  -1  -3   1  262.33    5.28
  -1  -3   1  266.96    5.52
   0   3  -1   71.47    1.79
   0   3  -1   75.83    1.77
   0   3  -1   75.02    1.82
   0  -3   1   73.68    1.84
   0  -3   1   73.52    1.81
   0  -3   1   75.04    1.73
  -1   3  -1    2.95    0.39
  -1   3  -1    3.37    0.40
  -1   3  -1    2.80    0.37
   1  -3   1    2.15    0.62
   1  -3   1    3.26    0.40
   1  -3   1    3.41    0.41
   1  -3   1    3.30    0.41
  -2   3  -1    5.76    0.49
  -2   3  -1    4.32    0.47
  -2   3  -1    5.73    0.45
  -2   3  -1    5.10    0.45
  -2   3  -1    5.32    0.45
   2  -3   1    4.43    0.50
   2  -3   1    4.34    0.49
   2  -3   1    5.00    0.52
   2  -3   1    5.60    0.84
  -3   3  -1   57.15    1.39
  -3   3  -1   57.82    1.75
  -3   3  -1   56.53    1.29
  -3   3  -1   57.36    1.41
   3  -3   1   56.77    1.67
   3  -3   1   56.52    2.18
   3  -3   1   57.13    1.72
   3  -3   1   56.63    1.59
  -4   3  -1    4.72    0.71
   4  -3   1    3.71    0.52
   4  -3   1    3.47    0.51
   4  -3   1    3.48    0.53
   4  -3   1    3.74    0.53
   4  -3   1    4.33    0.84
   5  -3   1    5.51    0.97
   5  -3   1    4.26    0.62
   5  -3   1    6.66    0.73
   5  -3   1    7.25    0.75
   5  -3   1    4.93    0.64
   6  -3   1   74.60    2.25
   6  -3   1   70.34    2.41
   6  -3   1   72.80    2.89
   6  -3   1   69.92    2.35
   7  -3   1    8.09    0.98
   7  -3   1    8.16    0.94
   7  -3   1    8.31    1.04
   8  -3   1   12.62    1.26
   8  -3   1   13.08    1.20
   8  -3   1   14.52    1.33
   9  -3   1    6.02    1.03
   9  -3   1    4.23    0.88
  10  -3   1    4.42    1.04
  10  -3   1    3.67    0.95
  11  -3   1    0.69    0.90
  11  -3   1   -0.92    0.83
  12   2  -1    4.14    1.12
  12   2  -1    4.44    1.24
  12   2  -1    3.67    1.49
  11   2  -1   10.91    1.93
  11   2  -1    6.11    1.13
  11   2  -1   13.85    1.62
  10   2  -1   12.68    1.50
  10   2  -1   13.82    1.94
  10   2  -1   11.65    1.32
   9   2  -1    9.03    1.60
   9   2  -1    6.88    1.10
   9   2  -1    8.90    1.08
   8   2  -1    5.88    0.86
   8   2  -1    4.87    0.91
   8   2  -1    6.02    1.33
  -8  -2   1    4.57    1.35
   7   2  -1    0.06    0.42
   7   2  -1   -0.10    0.68
   7   2  -1    0.37    0.57
   7   2  -1    0.32    0.49
  -7  -2   1    0.95    0.55
  -7  -2   1    1.03    0.86
   6   2  -1    4.22    0.64
   6   2  -1    4.53    1.04
   6   2  -1    4.14    0.63
   6   2  -1    4.69    0.77
  -6  -2   1    5.36    1.11
  -6  -2   1    4.02    0.64
   5   2  -1   17.19    1.64
   5   2  -1   17.07    0.97
   5   2  -1   16.25    1.12
   5   2  -1   17.08    0.93
  -5  -2   1   18.23    0.99
  -5  -2   1   17.39    1.45
   4   2  -1   51.72    2.24
   4   2  -1   53.46    1.56
   4   2  -1   51.96    1.62
  -4  -2   1   52.96    2.15
  -4  -2   1   52.00    1.21
  -4  -2   1   52.32    1.30
  -4  -2   1   53.81    1.31
  -4  -2   1   49.50    1.61
  -4  -2   1   56.89    1.95
   3   2  -1    0.43    0.42
   3   2  -1    0.32    0.30
   3   2  -1    0.23    0.17
   3   2  -1    0.33    0.28
  -3  -2   1    0.59    0.25
  -3  -2   1    0.46    0.18
  -3  -2   1    0.67    0.51
  -3  -2   1    0.37    0.21
  -3  -2   1    0.37    0.28
  -3  -2   1    0.37    0.59
  -3  -2   1    0.17    0.23
  -3  -2   1    0.59    0.47
   2   2  -1    0.41    0.43
   2   2  -1    0.36    0.21
   2   2  -1   -0.43    0.51
   2   2  -1    0.38    0.29
   2   2  -1    0.59    0.37
   2   2  -1    0.80    0.27
  -2  -2   1    0.23    0.45
  -2  -2   1    0.16    0.25
  -2  -2   1    0.38    0.57
  -2  -2   1    0.21    0.18
  -2  -2   1    0.58    0.24
  -2  -2   1    0.36    0.26
  -2  -2   1    0.30    0.46
   1   2  -1  618.03   11.50
   1   2  -1  624.30   12.41
   1   2  -1  613.10   13.24
   1   2  -1  617.55   12.68
   1   2  -1  628.76   11.37
   1   2  -1  638.96   11.43
   1   2  -1  608.28   12.00
  -1  -2   1  619.00   11.44
  -1  -2   1  621.62   12.01
  -1  -2   1  603.00   13.32
  -1  -2   1  618.90   11.47
   0   2  -1    2.32    0.50
   0   2  -1    2.44    0.34
   0   2  -1    2.67    0.29
   0   2  -1    2.34    0.30
   0   2  -1    2.60    0.30
   0  -2   1    3.68    0.37
   0  -2   1    2.85    0.33
   0  -2   1    2.59    0.32
   0  -2   1    3.21    0.34
  -1   2  -1    4.43    0.38
  -1   2  -1    4.72    0.38
  -1   2  -1    4.81    0.35
  -1   2  -1    4.49    0.34
   1  -2   1    4.24    0.38
   1  -2   1    4.17    0.38
   1  -2   1    4.87    0.39
   1  -2   1    4.17    0.65
  -2   2  -1   43.68    1.21
  -2   2  -1   43.73    1.25
  -2   2  -1   42.78    0.96
  -2   2  -1   44.00    1.04
  -2   2  -1   42.31    1.07
  -2   2  -1   44.77    1.03
   2  -2   1   42.27    1.22
   2  -2   1   42.71    1.15
   2  -2   1   43.30    1.15
   2  -2   1   41.66    1.61
   2  -2   1   42.22    1.18
  -3   2  -1   10.03    0.62
  -3   2  -1   12.12    0.84
   3  -2   1   11.30    0.64
   3  -2   1    8.88    0.62
   3  -2   1   11.36    0.98
   3  -2   1   11.26    0.64
   3  -2   1   10.83    0.66
  -4   2  -1    6.27    0.86
   4  -2   1    5.12    0.53
   4  -2   1    5.88    0.60
   4  -2   1    4.87    0.61
   4  -2   1    5.04    0.81
   4  -2   1    4.98    0.60
   5  -2   1   40.30    1.84
   5  -2   1   38.21    1.46
   5  -2   1   38.17    1.59
   5  -2   1   38.90    1.35
   6  -2   1   41.68    1.82
   6  -2   1   42.71    2.01
   6  -2   1   41.68    1.67
   6  -2   1   42.34    1.55
  -7   2  -1   -0.07    0.88
   7  -2   1    0.31    0.50
   7  -2   1    0.10    0.60
   7  -2   1   -0.44    0.43
   7  -2   1    0.83    0.77
   8  -2   1   17.77    1.36
   8  -2   1   18.80    1.52
   8  -2   1   15.27    1.21
   9  -2   1    6.13    0.98
   9  -2   1    4.02    0.88
   9  -2   1    6.14    1.19
  10  -2   1    0.98    0.76
  10  -2   1    1.65    0.82
  11  -2   1    6.74    1.21
  11  -2   1    5.14    1.10
  12   1  -1    5.45    1.58
  12   1  -1    4.78    1.34
  12   1  -1    3.48    1.07
  11   1  -1    1.32    0.91
  11   1  -1    2.94    0.98
  11   1  -1    1.92    1.17
  10   1  -1   23.20    1.77
  10   1  -1   21.15    2.26
  10   1  -1   22.78    1.63
   9   1  -1   32.26    2.29
   9   1  -1   31.29    1.88
   9   1  -1   32.86    1.71
   8   1  -1    1.40    0.63
   8   1  -1    2.79    1.03
   8   1  -1    1.28    0.64
   8   1  -1    2.13    0.67
  -8  -1   1    0.86    1.00
   7   1  -1   26.36    1.35
   7   1  -1   29.89    1.57
   7   1  -1   30.26    1.56
   7   1  -1   28.63    1.95
  -7  -1   1   29.33    1.53
  -7  -1   1   26.05    2.13
   6   1  -1    1.00    0.48
   6   1  -1    1.39    0.76
   6   1  -1    1.74    0.48
   6   1  -1    0.58    0.36
   6   1  -1    0.55    0.47
  -6  -1   1    1.70    0.55
  -6  -1   1    1.30    0.75
   5   1  -1   66.56    2.11
   5   1  -1   67.17    1.82
   5   1  -1   66.83    1.92
   5   1  -1   66.82    2.61
   5   1  -1   68.87    2.17
  -5  -1   1   72.70    2.74
  -5  -1   1   69.62    2.13
   4   1  -1   16.52    0.83
   4   1  -1   16.93    0.92
   4   1  -1   17.59    0.77
   4   1  -1   17.56    1.30
  -4  -1   1   17.00    0.58
  -4  -1   1   17.11    0.69
  -4  -1   1   16.92    0.93
  -4  -1   1   18.76    1.06
  -4  -1   1   16.55    0.61
  -4  -1   1   17.13    0.65
   3   1  -1   34.05    1.54
   3   1  -1   33.92    1.26
   3   1  -1   35.76    1.09
   3   1  -1   34.84    1.16
  -3  -1   1   34.82    0.99
  -3  -1   1   34.76    0.96
  -3  -1   1   33.37    1.61
  -3  -1   1   35.23    0.87
  -3  -1   1   34.13    1.30
  -3  -1   1   36.02    1.20
  -3  -1   1   33.98    0.91
   2   1  -1   11.36    0.58
   2   1  -1   11.23    0.46
   2   1  -1   11.42    0.57
   2   1  -1   11.38    0.44
   2   1  -1    9.56    0.75
   2   1  -1   10.72    0.72
  -2  -1   1   11.58    0.60
  -2  -1   1   11.73    0.47
  -2  -1   1   11.95    0.55
  -2  -1   1   11.67    0.48
  -2  -1   1   10.03    0.73
  -2  -1   1   11.57    0.42
  -2  -1   1   10.30    0.90
   1   1  -1    3.93    0.50
   1   1  -1    4.20    0.27
   1   1  -1    4.24    0.46
   1   1  -1    3.51    0.35
   1   1  -1    3.61    0.28
   1   1  -1    4.01    0.34
  -1  -1   1    4.24    0.30
  -1  -1   1    4.17    0.36
  -1  -1   1    3.39    0.35
  -1  -1   1    4.29    0.54
  -1  -1   1    4.19    0.47
   0   1  -1    1.36    0.27
   0   1  -1    1.41    0.17
   0   1  -1    1.44    0.19
   0   1  -1    1.18    0.16
   0   1  -1    1.60    0.14
   0   1  -1    1.63    0.15
   0  -1   1    1.46    0.17
   0  -1   1    1.07    0.14
   0  -1   1    1.29    0.21
   0  -1   1    1.71    0.16
   0  -1   1    1.24    0.17
   0  -1   1    1.38    0.29
  -1   1  -1   12.19    0.45
   1  -1   1   12.69    0.41
   1  -1   1   13.06    0.48
   1  -1   1   14.06    0.44
   1  -1   1   13.39    0.40
  -2   1  -1   36.80    1.24
  -2   1  -1   35.63    0.97
   2  -1   1   34.65    1.00
   2  -1   1   37.21    0.88
   2  -1   1   34.22    1.25
   2  -1   1   35.86    1.11
   2  -1   1   37.20    0.89
   2  -1   1   38.25    0.90
  -3   1  -1   -0.16    0.25
  -3   1  -1   -0.11    0.45
  -3   1  -1    0.03    0.36
   3  -1   1    0.32    0.22
   3  -1   1   -0.08    0.38
   3  -1   1   -0.01    0.36
   3  -1   1    0.00    0.19
   3  -1   1    0.51    0.24
  -4   1  -1   11.45    1.14
  -4   1  -1   10.45    0.84
   4  -1   1   11.67    0.65
   4  -1   1   12.81    0.98
   4  -1   1   10.41    0.90
   4  -1   1   10.44    0.73
  -5   1  -1   75.71    2.27
  -5   1  -1   78.41    3.01
   5  -1   1   74.30    2.18
   5  -1   1   77.75    1.98
   5  -1   1   75.08    2.53
   5  -1   1   76.97    2.47
  -6   1  -1    9.80    1.40
   6  -1   1    9.71    0.82
   6  -1   1   10.37    1.16
   6  -1   1    9.60    0.89
   6  -1   1    9.47    1.04
  -7   1  -1    3.38    1.12
   7  -1   1    3.73    0.90
   7  -1   1    5.65    0.80
   7  -1   1    5.84    0.75
   7  -1   1    5.03    0.93
  -8   1  -1   10.38    1.84
   8  -1   1   13.89    1.12
   8  -1   1   12.55    1.48
   8  -1   1   14.34    1.25
   9  -1   1    0.82    0.87
   9  -1   1    1.12    0.71
   9  -1   1    1.55    0.68
  10  -1   1    2.69    1.07
  10  -1   1    4.05    0.94
  10  -1   1    4.51    0.98
  11  -1   1    4.16    1.02
  11  -1   1    3.79    1.07
  12  -1   1    3.19    1.07
  12  -1   1    7.07    1.30
  12   0  -1    2.00    1.22
  12   0  -1    1.34    0.98
  12   0  -1    1.22    0.97
  11   0  -1    3.93    1.05
  11   0  -1    2.08    1.20
  11   0  -1    2.81    1.00
  10   0  -1   20.02    1.69
  10   0  -1   15.07    1.48
  10   0  -1   20.17    2.12
   9   0  -1    2.29    0.72
   9   0  -1    1.36    0.74
   9   0  -1    0.82    0.93
   8   0  -1    8.32    1.32
   8   0  -1    8.27    1.04
   8   0  -1    7.86    0.94
  -8   0   1    6.27    1.47
   7   0  -1   10.33    0.97
   7   0  -1   11.25    1.39
   7   0  -1   11.53    1.10
   7   0  -1   11.21    1.17
  -7   0   1    9.55    1.50
  -7   0   1   10.18    1.09
   6   0  -1    2.11    0.46
   6   0  -1    2.55    0.77
   6   0  -1    2.58    0.61
   6   0  -1    2.21    0.57
   6   0  -1    1.54    0.49
  -6   0   1    2.73    0.66
   5   0  -1   32.27    1.24
   5   0  -1   34.56    1.70
   5   0  -1   33.76    1.40
   5   0  -1   34.65    1.29
   5   0  -1   32.59    1.19
   5   0  -1   30.44    1.42
  -5   0   1   34.38    1.51
   4   0  -1   43.63    1.38
   4   0  -1   45.84    1.84
   4   0  -1   45.23    1.39
   4   0  -1   44.72    1.33
   4   0  -1   46.91    1.60
  -4   0   1   44.50    1.20
  -4   0   1   44.62    1.11
  -4   0   1   45.63    1.64
  -4   0   1   44.04    1.55
  -4   0   1   43.95    1.21
  -4   0   1   43.72    1.13
   3   0  -1   15.97    0.71
   3   0  -1   14.85    0.66
   3   0  -1   14.62    0.79
   3   0  -1   15.86    0.99
   3   0  -1   13.92    0.81
  -3   0   1   15.44    0.82
  -3   0   1   15.59    0.65
  -3   0   1   15.31    0.55
  -3   0   1   14.25    0.60
  -3   0   1   15.88    1.03
  -3   0   1   15.44    0.55
  -3   0   1   13.73    0.83
   2   0  -1   61.86    1.36
   2   0  -1   65.21    1.45
   2   0  -1   63.57    1.36
   2   0  -1   62.50    1.48
   2   0  -1   62.78    1.64
   2   0  -1   62.40    1.47
   2   0  -1   63.44    1.61
   2   0  -1   60.33    1.82
  -2   0   1   61.32    1.86
  -2   0   1   61.76    1.66
  -2   0   1   62.20    1.62
  -2   0   1   62.02    1.44
  -2   0   1   61.98    1.35
  -2   0   1   60.94    1.35
  -2   0   1   62.42    1.43
   1   0  -1   29.19    0.67
   1   0  -1   27.44    0.90
   1   0  -1   29.90    0.81
   1   0  -1   30.25    0.67
   1   0  -1   30.15    0.73
   1   0  -1   30.20    0.82
  -1   0   1   29.54    0.68
  -1   0   1   31.31    0.73
  -1   0   1   28.27    0.73
  -1   0   1   30.45    0.74
  -1   0   1   28.54    0.81
  -1   0   1   29.47    0.83
  -1   0   1   29.77    0.92
  -1   0  -1   71.99    1.94
  -1   0  -1   73.05    1.90
   1   0   1   73.77    1.92
   1   0   1   72.44    1.87
  -2   0  -1    5.14    0.72
  -2   0  -1    3.65    0.60
   2   0   1    5.13    0.42
   2   0   1    4.01    0.60
  -3   0  -1   12.89    1.08
  -3   0  -1   12.50    1.09
   3   0   1   13.37    0.75
   3   0   1   12.07    0.95
  -4   0  -1   12.87    1.32
  -4   0  -1   16.67    1.36
   4   0   1   16.39    1.16
   4   0   1   15.44    0.91
   4   0   1   15.75    0.66
   4   0   1   15.28    0.82
  -5   0  -1   67.55    2.81
   5   0   1   67.10    2.00
   5   0   1   71.29    1.80
   5   0   1   65.91    2.12
   5   0   1   68.61    2.52
  -6   0  -1    1.53    0.86
   6   0   1    1.45    0.68
   6   0   1    1.20    0.53
   6   0   1    1.23    0.43
   6   0   1    0.75    0.43
  -7   0  -1   20.43    2.11
   7   0   1   23.40    1.31
   7   0   1   25.65    1.78
   7   0   1   24.49    1.23
   7   0   1   21.81    1.39
   7   0   1   23.21    1.19
  -8   0  -1   29.71    2.54
   8   0   1   30.61    1.45
   8   0   1   27.80    1.97
   8   0   1   26.40    1.52
   9   0   1    2.35    0.70
   9   0   1   -0.52    0.78
   9   0   1    1.96    0.77
  10   0   1    4.94    1.02
  10   0   1    5.09    0.95
  10   0   1    4.70    1.28
  11   0   1   11.85    1.81
  11   0   1   10.67    1.37
  11   0   1   12.52    1.46
  12   0   1    4.38    1.14
  12   0   1    4.05    1.15
  12  -1  -1    2.49    1.11
  11  -1  -1    4.65    1.12
  11  -1  -1    3.93    1.30
  11  -1  -1    5.25    1.16
  10  -1  -1    6.28    1.35
  10  -1  -1    3.03    0.92
  10  -1  -1    4.27    0.96
   9  -1  -1    4.74    0.97
   9  -1  -1    3.80    0.86
   9  -1  -1    3.24    0.99
   8  -1  -1   14.91    1.22
   8  -1  -1   18.19    1.61
   8  -1  -1   17.73    1.37
  -8   1   1   14.07    1.97
   7  -1  -1    5.96    0.93
   7  -1  -1    5.92    0.81
   7  -1  -1    6.53    0.89
   7  -1  -1    6.36    1.10
  -7   1   1    5.45    0.93
   6  -1  -1    1.17    0.67
   6  -1  -1    3.04    0.67
   6  -1  -1    1.71    0.54
   6  -1  -1    2.19    0.50
   6  -1  -1    1.98    0.50
  -6   1   1    1.81    0.65
   5  -1  -1   82.64    2.25
   5  -1  -1   87.34    2.46
   5  -1  -1   83.66    2.64
   5  -1  -1   83.50    2.24
   5  -1  -1   81.27    2.74
  -5   1   1   85.67    2.68
   4  -1  -1   57.42    2.03
   4  -1  -1   57.69    1.66
   4  -1  -1   60.67    1.67
   4  -1  -1   58.44    1.99
  -4   1   1   56.77    2.00
  -4   1   1   56.49    1.37
  -4   1   1   58.12    1.51
   3  -1  -1    0.16    0.28
   3  -1  -1   -0.13    0.24
   3  -1  -1    0.16    0.29
   3  -1  -1    0.48    0.40
   3  -1  -1   -0.36    0.34
  -3   1   1    0.20    0.26
  -3   1   1    0.58    0.42
  -3   1   1    0.37    0.39
  -3   1   1    0.02    0.19
  -3   1   1   -0.09    0.23
  -3   1   1    0.13    0.28
  -3   1   1    0.09    0.21
   2  -1  -1    9.84    0.61
   2  -1  -1    8.85    0.74
   2  -1  -1    9.99    0.56
   2  -1  -1    8.70    0.54
   2  -1  -1    8.90    0.66
  -2   1   1    9.72    0.60
  -2   1   1    9.16    0.74
  -2   1   1    9.37    0.53
  -2   1   1    8.86    0.52
  -2   1   1    9.00    0.43
  -2   1   1    9.15    0.47
  -2   1   1    9.11    0.69
   1  -1  -1  712.71   13.81
   1  -1  -1  721.78   14.86
   1  -1  -1  744.90   13.10
   1  -1  -1  696.04   13.98
   1  -1  -1  710.65   13.16
   1  -1  -1  724.86   13.14
  -1   1   1  723.19   14.85
  -1   1   1  740.80   13.14
  -1   1   1  694.00   13.15
  -1   1   1  700.19   14.01
  -1   1   1  720.47   13.82
   0  -1  -1    0.46    0.12
   0  -1  -1    0.26    0.18
   0  -1  -1    0.33    0.11
   0  -1  -1    0.31    0.09
   0  -1  -1    0.34    0.11
   0   1   1    0.34    0.10
   0   1   1    0.43    0.20
   0   1   1    0.30    0.10
   0   1   1    0.38    0.12
   0   1   1    0.42    0.12
   1   1   1    0.81    0.37
  -2  -1  -1   26.84    1.50
  -2  -1  -1   24.75    1.30
   2   1   1   22.44    1.38
   2   1   1   25.90    0.72
   2   1   1   26.81    1.24
  -3  -1  -1    3.01    0.85
  -3  -1  -1    1.91    0.67
   3   1   1    2.50    0.73
   3   1   1    1.90    0.34
  -4  -1  -1   11.73    1.30
   4   1   1   12.09    1.28
   4   1   1   12.20    0.74
   4   1   1   12.19    0.79
  -5  -1  -1   24.04    1.75
   5   1   1   22.42    1.11
   5   1   1   23.80    0.89
   5   1   1   22.48    1.08
   5   1   1   22.35    1.59
  -6  -1  -1   20.07    1.97
   6   1   1   18.96    1.13
   6   1   1   20.33    1.14
   6   1   1   20.48    0.96
   6   1   1   21.87    1.66
  -7  -1  -1   29.13    2.34
   7   1   1   31.16    2.05
   7   1   1   30.63    1.52
   7   1   1   27.95    1.28
   7   1   1   30.48    1.50
  -8  -1  -1    4.68    1.40
   8   1   1    4.83    0.75
   8   1   1    5.48    0.87
   8   1   1    5.93    0.90
   8   1   1    5.09    1.21
   9   1   1   25.39    2.19
   9   1   1   28.09    1.57
   9   1   1   27.68    1.70
   9   1   1   25.02    1.50
  10   1   1   22.81    1.55
  10   1   1   23.87    2.41
  10   1   1   28.46    1.82
  11   1   1    1.79    0.86
  11   1   1    4.60    1.35
  11   1   1    3.72    1.02
  12   1   1    3.10    1.03
  12   1   1    2.46    1.11
  12   1   1    6.18    1.58
  11  -2  -1    3.16    1.06
  11  -2  -1    1.69    0.97
  10  -2  -1    0.55    0.89
  10  -2  -1    0.84    0.73
  10  -2  -1    0.67    0.71
   9  -2  -1   28.43    1.78
   9  -2  -1   27.84    2.01
   9  -2  -1   24.91    1.65
   8  -2  -1   11.47    1.42
   8  -2  -1   13.56    1.27
   8  -2  -1   11.49    1.18
   7  -2  -1   10.70    1.06
   7  -2  -1   12.79    1.35
   7  -2  -1   10.23    1.09
   6  -2  -1   15.35    1.43
   6  -2  -1   13.25    1.07
   6  -2  -1   15.91    1.03
   6  -2  -1   15.25    1.23
   6  -2  -1   16.16    1.05
  -6   2   1   16.12    1.44
   5  -2  -1   45.58    1.67
   5  -2  -1   42.02    1.89
   5  -2  -1   42.95    1.80
   5  -2  -1   42.50    1.52
   5  -2  -1   43.34    1.55
  -5   2   1   43.05    1.28
  -5   2   1   42.43    1.94
  -5   2   1   42.40    1.15
  -5   2   1   41.93    1.27
   4  -2  -1   13.00    0.82
   4  -2  -1   13.16    0.86
   4  -2  -1   13.16    0.92
   4  -2  -1   11.79    0.80
   4  -2  -1   14.61    1.08
  -4   2   1   12.89    1.10
  -4   2   1   13.89    0.60
  -4   2   1   13.32    0.69
  -4   2   1   13.15    0.72
   3  -2  -1    1.28    0.42
   3  -2  -1    1.53    0.38
   3  -2  -1    0.96    0.35
   3  -2  -1    0.81    0.50
   3  -2  -1    1.33    0.38
  -3   2   1    1.17    0.34
  -3   2   1    1.54    0.47
  -3   2   1    0.64    0.32
  -3   2   1    1.40    0.27
  -3   2   1    1.14    0.54
   2  -2  -1   23.62    1.21
   2  -2  -1   25.88    0.94
   2  -2  -1   26.30    0.95
   2  -2  -1   25.63    0.88
  -2   2   1   24.93    0.84
  -2   2   1   24.30    1.00
  -2   2   1   24.48    0.93
  -2   2   1   25.24    0.89
  -2   2   1   24.66    1.22
   1  -2  -1    0.01    0.26
   1  -2  -1    0.12    0.27
   1  -2  -1    0.73    0.47
   1  -2  -1    0.42    0.28
  -1   2   1    0.38    0.31
  -1   2   1    0.23    0.27
  -1   2   1    0.26    0.44
   0  -2  -1    4.66    0.37
   0  -2  -1    3.96    0.53
   0  -2  -1    4.88    0.39
   0  -2  -1    5.06    0.36
   0  -2  -1    4.52    0.40
   0   2   1    4.71    0.35
   0   2   1    4.89    0.37
   0   2   1    4.34    0.36
   0   2   1    5.04    0.42
   0   2   1    4.98    0.62
  -1  -2  -1   25.96    0.68
  -1  -2  -1   27.21    0.62
  -1  -2  -1   28.51    1.02
  -1  -2  -1   27.07    0.75
  -1  -2  -1   28.16    0.64
   1   2   1   26.60    1.09
   1   2   1   27.28    0.72
   1   2   1   26.81    0.67
   1   2   1   26.68    0.74
   1   2   1   27.06    0.78
  -2  -2  -1   61.60    2.25
  -2  -2  -1   62.06    1.42
  -2  -2  -1   64.19    2.54
  -2  -2  -1   60.66    1.62
   2   2   1   63.37    1.47
   2   2   1   60.71    2.17
  -3  -2  -1    1.91    0.85
  -3  -2  -1    1.46    0.73
   3   2   1    1.61    0.31
   3   2   1    2.11    0.81
   3   2   1    1.35    0.56
  -4  -2  -1    1.25    0.73
   4   2   1    0.78    0.56
   4   2   1    0.30    0.73
   4   2   1    0.68    0.33
   4   2   1    0.70    0.44
  -5  -2  -1   13.95    1.56
   5   2   1   15.61    0.73
   5   2   1   14.83    0.99
   5   2   1   17.16    1.72
   5   2   1   13.82    0.82
  -6  -2  -1    6.66    1.29
   6   2   1    3.74    0.66
   6   2   1    6.49    1.18
   6   2   1    5.44    0.66
   6   2   1    5.25    0.58
  -7  -2  -1    8.72    1.52
   7   2   1    8.63    0.91
   7   2   1   10.25    1.52
   7   2   1   10.71    1.05
   7   2   1   11.86    0.89
  -8  -2  -1    7.48    1.56
   8   2   1    6.89    0.84
   8   2   1    4.75    0.89
   8   2   1    5.84    0.90
   8   2   1    6.71    1.41
   9   2   1   11.32    1.24
   9   2   1    8.59    1.63
   9   2   1    8.70    1.01
  10   2   1   39.11    2.78
  10   2   1   42.32    2.20
  10   2   1   40.02    1.98
  11   2   1    0.20    0.76
  11   2   1    0.77    0.80
  11   2   1    0.02    0.79
  11   2   1    0.93    1.20
  12   2   1    7.16    1.31
  12   2   1    6.07    1.72
  12   2   1    5.66    1.17
  11  -3  -1   -0.21    0.84
  10  -3  -1    2.18    0.87
  10  -3  -1    3.56    1.04
   9  -3  -1   12.04    1.27
   9  -3  -1   12.63    1.39
   9  -3  -1   11.56    1.47
   8  -3  -1    8.04    1.20
   8  -3  -1   11.54    1.26
   8  -3  -1    9.06    1.08
   7  -3  -1   19.74    1.33
   7  -3  -1   22.35    1.44
   7  -3  -1   19.29    1.49
   6  -3  -1   56.32    1.98
   6  -3  -1   54.59    2.08
   6  -3  -1   54.77    2.46
   6  -3  -1   56.42    2.22
  -6   3   1   54.00    2.50
   5  -3  -1   25.30    1.35
   5  -3  -1   23.60    1.26
   5  -3  -1   21.94    1.52
   5  -3  -1   25.53    1.25
   5  -3  -1   24.07    1.20
  -5   3   1   22.28    0.98
  -5   3   1   24.67    1.00
  -5   3   1   24.47    1.65
  -5   3   1   22.99    0.85
   4  -3  -1    1.13    0.58
   4  -3  -1    0.76    0.40
   4  -3  -1    0.97    0.41
   4  -3  -1    0.56    0.36
   4  -3  -1    0.33    0.45
  -4   3   1    0.29    0.33
  -4   3   1    0.28    0.34
  -4   3   1    0.49    0.26
  -4   3   1    0.77    0.61
   3  -3  -1   63.19    2.31
   3  -3  -1   59.87    1.83
   3  -3  -1   63.88    1.76
   3  -3  -1   64.27    1.89
  -3   3   1   64.30    1.77
  -3   3   1   65.85    2.03
  -3   3   1   62.49    1.88
  -3   3   1   61.35    1.71
  -3   3   1   64.69    2.38
   2  -3  -1   36.46    1.25
   2  -3  -1   38.62    1.28
   2  -3  -1   38.07    1.20
   2  -3  -1   35.51    1.63
  -2   3   1   37.31    1.26
  -2   3   1   36.75    1.30
  -2   3   1   36.03    1.71
  -2   3   1   37.20    1.23
  -2   3   1   36.22    1.18
   1  -3  -1    3.45    0.44
   1  -3  -1    2.82    0.40
   1  -3  -1    2.66    0.60
   1  -3  -1    2.51    0.36
  -1   3   1    1.99    0.60
  -1   3   1    2.93    0.40
  -1   3   1    3.12    0.42
   0  -3  -1   48.65    1.33
   0  -3  -1   48.17    1.33
   0  -3  -1   48.94    1.23
   0  -3  -1   50.31    1.72
   0   3   1   50.85    1.83
   0   3   1   48.02    1.34
   0   3   1   48.41    1.30
   0   3   1   47.91    1.33
  -1  -3  -1    3.09    0.28
  -1  -3  -1    2.52    0.54
  -1  -3  -1    2.56    0.33
  -1  -3  -1    3.95    0.37
  -1  -3  -1    3.30    0.31
   1   3   1    3.41    0.37
   1   3   1    2.76    0.35
   1   3   1    2.95    0.35
  -2  -3  -1    5.68    0.44
  -2  -3  -1    5.65    0.65
   2   3   1    5.99    0.45
   2   3   1    5.03    0.87
   2   3   1    5.73    0.46
   2   3   1    4.92    1.03
  -3  -3  -1    8.86    1.15
  -3  -3  -1    9.20    0.53
   3   3   1   10.42    0.60
   3   3   1    8.70    1.02
   3   3   1    9.58    0.55
  -4  -3  -1   32.31    2.03
  -4  -3  -1   36.18    1.12
   4   3   1   35.68    1.10
   4   3   1   34.29    1.81
   4   3   1   36.73    2.22
   4   3   1   35.77    1.19
  -5  -3  -1    1.03    0.82
   5   3   1    0.67    0.51
   5   3   1    0.26    0.31
   5   3   1    0.27    0.32
   5   3   1    0.81    0.61
   5   3   1    1.51    0.89
  -6  -3  -1    1.19    0.91
   6   3   1    1.03    0.92
   6   3   1    1.33    0.44
   6   3   1    2.06    0.60
   6   3   1    1.35    0.43
  -7  -3  -1    1.19    1.06
   7   3   1    1.49    0.50
   7   3   1    1.55    1.01
   7   3   1    1.35    0.62
   7   3   1    0.80    0.46
  -8  -3  -1    1.75    1.21
   8   3   1    1.14    0.57
   8   3   1    1.15    0.56
   8   3   1    0.69    0.67
   8   3   1    0.94    1.00
   9   3   1    7.28    0.95
   9   3   1    4.79    0.97
   9   3   1    7.86    1.65
  10   3   1   10.57    1.35
  10   3   1    8.94    1.18
  10   3   1   11.69    1.94
  11   3   1    2.76    0.98
  11   3   1    0.60    1.25
  11   3   1    1.65    0.88
  12   3   1    1.23    0.97
  12   3   1    0.54    0.88
  12   3   1    0.96    0.90
  12   3   1    0.89    1.26
  11  -4  -1   -0.65    0.85
  10  -4  -1    8.72    1.32
   9  -4  -1    1.12    0.80
   9  -4  -1    0.11    0.73
   8  -4  -1   -0.56    0.63
   8  -4  -1    1.02    0.68
   7  -4  -1   26.86    1.61
   7  -4  -1   23.27    1.45
   6  -4  -1    0.01    0.50
   6  -4  -1    0.96    0.57
   5  -4  -1    2.48    0.77
   5  -4  -1    2.16    0.59
   5  -4  -1    2.59    0.61
   5  -4  -1    2.28    0.58
  -5   4   1    1.72    0.81
  -5   4   1    0.78    0.32
  -5   4   1    2.93    0.52
  -5   4   1    2.27    0.47
   4  -4  -1   24.33    1.17
   4  -4  -1   24.93    1.63
   4  -4  -1   23.71    1.25
   4  -4  -1   23.82    1.24
  -4   4   1   23.57    0.90
  -4   4   1   25.55    1.11
  -4   4   1   24.95    1.73
  -4   4   1   25.26    1.10
   3  -4  -1   49.65    1.60
   3  -4  -1   49.91    1.69
   3  -4  -1   49.67    2.18
  -3   4   1   48.25    1.58
  -3   4   1   50.86    1.62
  -3   4   1   48.66    2.24
  -3   4   1   50.97    1.75
   2  -4  -1   45.14    1.53
   2  -4  -1   44.15    1.52
   2  -4  -1   45.64    1.98
   2  -4  -1   48.72    1.47
  -2   4   1   46.39    1.51
  -2   4   1   44.56    1.53
  -2   4   1   43.33    2.05
  -2   4   1   45.48    1.47
  -2   4   1   46.37    1.53
   1  -4  -1    3.38    0.50
   1  -4  -1    4.03    0.44
   1  -4  -1    4.52    0.82
   1  -4  -1    4.15    0.50
  -1   4   1    3.83    0.51
  -1   4   1    2.87    0.81
  -1   4   1    3.88    0.48
   0  -4  -1  244.40    5.75
   0  -4  -1  230.55    4.84
   0  -4  -1  241.47    5.00
   0  -4  -1  244.60    5.18
   0   4   1  244.99    5.19
   0   4   1  244.14    5.89
   0   4   1  248.05    5.01
   0   4   1  249.79    5.05
  -1  -4  -1   17.99    1.19
  -1  -4  -1   17.31    0.79
  -1  -4  -1   17.50    0.79
   1   4   1   17.90    0.84
   1   4   1   18.96    0.84
   1   4   1   19.12    0.81
  -2  -4  -1   65.61    1.56
  -2  -4  -1   63.80    2.12
  -2  -4  -1   63.14    1.41
  -2  -4  -1   63.93    1.48
  -2  -4  -1   61.73    1.66
   2   4   1   63.23    1.72
   2   4   1   63.46    1.67
  -3  -4  -1    6.63    0.55
   3   4   1    7.16    1.33
   3   4   1    7.21    0.57
   3   4   1    7.44    0.61
  -4  -4  -1   38.05    1.20
   4   4   1   37.12    1.80
   4   4   1   36.82    1.26
   4   4   1   37.24    1.95
   4   4   1   34.91    1.22
   4   4   1   37.80    2.28
  -5  -4  -1    2.23    0.96
  -5  -4  -1    2.28    0.39
   5   4   1    1.74    0.62
   5   4   1    1.54    0.87
   5   4   1    1.79    0.77
   5   4   1    2.68    0.46
   5   4   1    2.67    0.48
  -6  -4  -1   13.81    1.84
   6   4   1   12.19    1.41
   6   4   1   14.97    1.90
   6   4   1   14.74    1.27
   6   4   1   14.84    0.94
   6   4   1   12.32    0.90
  -7  -4  -1   23.04    2.50
   7   4   1   22.07    1.21
   7   4   1   23.92    2.45
   7   4   1   23.43    1.57
   7   4   1   20.48    1.20
  -8  -4  -1   -0.52    1.07
   8   4   1    3.18    1.29
   8   4   1    1.20    0.60
   8   4   1    1.43    0.66
   8   4   1    1.10    0.73
  -9  -4  -1    7.27    1.89
   9   4   1    5.77    1.59
   9   4   1    7.57    1.24
   9   4   1    7.61    0.99
  10   4   1    2.83    0.88
  10   4   1    3.29    1.00
  10   4   1    6.58    1.57
  11   4   1   -0.53    0.80
  11   4   1    2.90    1.48
  11   4   1    0.22    0.84
  12   4   1   -0.33    1.25
  12   4   1    0.62    0.88
  12   4   1    1.20    1.01
  10  -5  -1   -0.84    0.76
   9  -5  -1   -0.20    0.74
   8  -5  -1   12.35    1.36
   8  -5  -1   14.13    1.39
   7  -5  -1    5.03    0.94
   7  -5  -1    6.64    1.03
   6  -5  -1    1.24    0.68
   6  -5  -1    0.54    0.55
   5  -5  -1    0.07    0.49
   5  -5  -1    0.57    0.54
  -5   5   1    0.02    0.38
  -5   5   1    0.21    0.32
  -5   5   1    0.72    0.48
   4  -5  -1   33.40    1.47
   4  -5  -1   34.21    1.57
   4  -5  -1   36.02    2.07
   4  -5  -1   33.03    1.55
  -4   5   1   35.28    1.41
  -4   5   1   33.81    2.11
  -4   5   1   34.45    1.38
   3  -5  -1   15.43    1.04
   3  -5  -1   15.65    0.99
   3  -5  -1   18.52    1.52
  -3   5   1   16.90    0.98
  -3   5   1   13.68    1.45
  -3   5   1   17.68    1.02
   2  -5  -1   -0.08    0.33
   2  -5  -1    0.77    0.63
   2  -5  -1    0.74    0.40
   2  -5  -1    0.60    0.40
  -2   5   1    0.65    0.64
  -2   5   1    0.42    0.34
  -2   5   1    0.55    0.37
  -2   5   1    0.85    0.40
  -2   5   1    0.66    0.39
   1  -5  -1   25.32    1.13
   1  -5  -1   24.46    1.15
   1  -5  -1   24.32    1.55
  -1   5   1   25.81    1.12
  -1   5   1   28.77    1.16
  -1   5   1   27.80    1.77
  -1   5   1   27.01    1.16
   0  -5  -1   37.03    1.34
   0  -5  -1   36.26    1.79
   0  -5  -1   37.67    1.20
   0  -5  -1   35.66    1.31
   0   5   1   37.41    1.36
   0   5   1   35.97    1.33
   0   5   1   36.54    1.31
  -1  -5  -1    0.61    0.30
  -1  -5  -1    0.56    0.31
  -1  -5  -1    0.25    0.36
  -1  -5  -1    0.80    0.61
   1   5   1    0.46    0.37
   1   5   1    1.13    0.42
   1   5   1    0.35    0.31
  -2  -5  -1   81.81    2.05
  -2  -5  -1   83.62    2.17
  -2  -5  -1   81.51    1.87
   2   5   1   82.75    2.20
   2   5   1   82.93    2.19
   2   5   1   84.84    3.69
  -3  -5  -1   22.26    0.96
  -3  -5  -1   19.99    0.65
  -3  -5  -1   22.87    0.80
   3   5   1   23.45    1.03
   3   5   1   23.51    1.01
   3   5   1   24.26    1.68
   3   5   1   22.50    2.07
  -4  -5  -1    9.93    0.69
   4   5   1   10.04    0.78
   4   5   1   11.52    1.70
   4   5   1   12.20    1.37
   4   5   1    9.61    1.20
   4   5   1   10.56    0.73
  -5  -5  -1    4.18    0.52
   5   5   1    4.64    1.00
   5   5   1    4.18    1.19
   5   5   1    3.60    0.89
   5   5   1    3.84    0.55
   5   5   1    4.57    0.63
  -6  -5  -1   20.64    2.19
   6   5   1   16.06    1.51
   6   5   1   16.08    1.06
   6   5   1   16.77    1.70
   6   5   1   17.24    1.02
  -7  -5  -1   56.24    3.43
   7   5   1   64.38    2.73
   7   5   1   63.50    2.13
   7   5   1   60.48    3.53
   7   5   1   62.01    2.13
  -8  -5  -1    3.62    1.44
   8   5   1    3.92    0.99
   8   5   1    1.18    1.20
   8   5   1    4.12    0.79
  -9  -5  -1   10.36    2.15
   9   5   1   12.37    1.48
   9   5   1   12.44    2.20
   9   5   1   10.98    1.20
  10   5   1   21.07    1.93
  10   5   1   20.13    2.62
  10   5   1   18.78    1.61
  11   5   1    1.03    1.25
  11   5   1    0.33    0.79
  11   5   1   -0.53    0.79
  12   5   1    1.66    1.02
  12   5   1   -0.12    0.89
  12   5   1    1.83    1.57
  10  -6  -1   -0.15    0.93
   9  -6  -1   -1.23    0.80
   8  -6  -1    9.27    1.27
   7  -6  -1   -0.17    0.67
   7  -6  -1    0.17    0.68
   6  -6  -1   -0.05    0.57
   6  -6  -1    0.13    0.62
   5  -6  -1    0.36    0.58
   5  -6  -1   -0.09    0.52
  -5   6   1    0.40    0.35
  -5   6   1    0.06    0.42
  -5   6   1   -0.09    0.51
   4  -6  -1    3.08    0.68
   4  -6  -1    2.81    0.70
   4  -6  -1    3.63    0.77
  -4   6   1    1.80    0.60
  -4   6   1    3.95    0.65
   3  -6  -1    6.50    1.14
   3  -6  -1    7.24    0.92
   3  -6  -1    6.10    0.87
   3  -6  -1    5.23    0.74
  -3   6   1    6.52    0.79
  -3   6   1    6.20    0.78
   2  -6  -1   11.34    0.91
   2  -6  -1   10.13    0.97
   2  -6  -1    9.79    1.29
  -2   6   1   10.72    0.93
  -2   6   1   11.17    0.97
   1  -6  -1   44.73    1.60
   1  -6  -1   59.25    1.92
   1  -6  -1   58.12    2.48
   1  -6  -1   59.52    1.92
  -1   6   1   54.41    1.84
  -1   6   1   57.21    1.86
  -1   6   1   56.61    1.88
   0  -6  -1    0.37    0.36
   0  -6  -1    0.59    0.64
   0  -6  -1    0.74    0.42
   0  -6  -1    0.35    0.32
   0   6   1    0.47    0.38
   0   6   1    0.27    0.34
   0   6   1   -0.12    0.34
  -1  -6  -1    8.41    0.74
  -1  -6  -1    7.27    0.60
  -1  -6  -1    8.23    0.75
   1   6   1    9.62    1.61
   1   6   1    6.23    0.65
   1   6   1    8.27    0.81
   1   6   1    7.96    0.76
  -2  -6  -1  200.97    4.36
  -2  -6  -1  204.17    4.15
  -2  -6  -1  204.96    4.59
   2   6   1  195.63    6.46
   2   6   1  206.13    4.65
   2   6   1  198.68    4.54
  -3  -6  -1    7.37    0.48
  -3  -6  -1    7.55    0.60
  -3  -6  -1    7.36    0.69
   3   6   1    5.27    1.11
   3   6   1    6.21    1.44
   3   6   1    6.90    0.77
   3   6   1    6.87    0.68
  -4  -6  -1   13.55    0.84
   4   6   1   14.23    1.50
   4   6   1   13.32    0.88
   4   6   1   14.74    0.99
   4   6   1   14.52    1.60
   4   6   1   13.06    1.91
  -5  -6  -1   29.84    1.21
   5   6   1   27.70    2.73
   5   6   1   26.59    1.26
   5   6   1   30.55    1.39
   5   6   1   30.42    2.00
   5   6   1   31.41    2.05
   6   6   1   21.33    1.78
   6   6   1   16.05    1.68
   6   6   1   19.80    2.39
   6   6   1   19.96    1.23
   6   6   1   17.20    1.08
   7   6   1    8.71    1.04
   7   6   1    8.12    1.35
   7   6   1    7.11    1.75
   7   6   1    9.18    1.36
  -8  -6  -1    0.87    1.22
   8   6   1    1.11    0.85
   8   6   1    0.81    0.70
   8   6   1    0.53    1.25
   9   6   1   15.87    1.44
   9   6   1   14.34    1.69
   9   6   1   14.84    2.39
  10   6   1   -0.08    0.76
  10   6   1   -0.21    0.84
  10   6   1   -0.35    1.23
  11   6   1    1.28    0.91
  11   6   1   -0.87    1.34
  11   6   1    0.39    0.90
  12   6   1    3.83    1.88
  12   6   1    3.39    1.22
  12   6   1    2.72    1.12
   9  -7  -1    2.93    1.11
   8  -7  -1   -0.16    0.81
   7  -7  -1    1.42    0.80
   6  -7  -1    1.24    0.74
   6  -7  -1   -0.76    0.65
   5  -7  -1    5.18    0.88
   5  -7  -1    7.16    1.03
  -5   7   1    4.63    0.60
  -5   7   1    4.18    0.65
  -5   7   1    5.58    0.82
   4  -7  -1    0.66    0.58
   4  -7  -1    0.78    0.61
  -4   7   1    0.52    0.50
  -4   7   1    0.59    0.60
   3  -7  -1    6.89    0.92
   3  -7  -1    4.76    0.83
   3  -7  -1    8.40    0.89
  -3   7   1    6.95    0.86
  -3   7   1    7.87    0.93
   2  -7  -1   50.87    2.61
   2  -7  -1   40.47    1.80
   2  -7  -1   52.50    1.81
   2  -7  -1   54.93    2.04
  -2   7   1   54.56    1.92
  -2   7   1   51.25    1.94
   1  -7  -1    5.23    0.77
   1  -7  -1    6.21    0.85
   1  -7  -1    4.24    0.62
  -1   7   1    5.78    0.75
  -1   7   1    5.87    0.81
   0  -7  -1   -0.14    0.42
   0  -7  -1    0.21    0.41
   0  -7  -1   -0.21    0.32
   0   7   1    0.37    0.41
   0   7   1   -0.16    0.18
   0   7   1   -0.29    0.35
  -1  -7  -1   37.20    1.48
  -1  -7  -1   36.96    1.49
  -1  -7  -1   35.11    1.25
   1   7   1   31.30    2.58
   1   7   1   35.09    1.48
   1   7   1   34.42    1.44
   1   7   1   33.51    1.52
  -2  -7  -1   86.27    2.45
  -2  -7  -1   81.12    2.32
  -2  -7  -1   87.21    2.12
   2   7   1   79.07    2.45
   2   7   1   85.99    2.56
   2   7   1   86.38    4.09
  -3  -7  -1   -0.04    0.36
  -3  -7  -1   -0.05    0.33
  -3  -7  -1   -0.02    0.25
   3   7   1    0.57    1.01
   3   7   1    0.13    0.46
   3   7   1   -0.24    0.34
   3   7   1    1.60    0.89
  -4  -7  -1    5.02    0.62
   4   7   1    4.60    1.11
   4   7   1    3.83    0.60
   4   7   1    5.05    1.48
   4   7   1    3.55    0.70
  -5  -7  -1   24.71    1.21
   5   7   1   27.87    2.05
   5   7   1   27.17    2.86
   5   7   1   25.14    2.09
   5   7   1   26.36    1.31
   5   7   1   23.76    1.40
   6   7   1    3.74    1.10
   6   7   1    4.60    1.18
   6   7   1    4.62    0.83
   6   7   1    4.65    1.51
   7   7   1    3.84    1.16
   7   7   1    3.49    0.83
   7   7   1    4.96    1.56
   7   7   1    4.84    1.21
   8   7   1   21.27    2.09
   8   7   1   19.90    2.71
   8   7   1   18.35    1.54
   9   7   1    0.20    0.68
   9   7   1    1.17    0.89
   9   7   1    1.17    1.27
  10   7   1    5.56    1.35
  10   7   1    6.07    1.13
  10   7   1    4.45    1.71
  11   7   1    5.77    1.44
  11   7   1    7.88    1.32
  11   7   1    7.61    2.17
  12   7   1    0.70    1.00
  12   7   1   -0.60    0.98
  12   7   1    0.36    1.65
   8  -8  -1    6.20    1.22
   7  -8  -1    0.24    0.81
   6  -8  -1    0.63    0.76
   5  -8  -1    0.57    0.68
  -5   8   1   -0.10    0.41
  -5   8   1    0.22    0.57
  -5   8   1    0.40    0.53
   4  -8  -1    3.20    0.79
  -4   8   1    3.61    0.83
   3  -8  -1   -0.15    0.51
   3  -8  -1    0.82    0.60
  -3   8   1    0.60    0.63
   2  -8  -1    0.43    0.39
   2  -8  -1    2.48    0.78
   2  -8  -1    1.62    0.59
  -2   8   1    1.51    0.69
   1  -8  -1    7.46    0.84
   1  -8  -1    7.05    0.98
   1  -8  -1    8.85    0.98
  -1   8   1    5.30    0.86
   0  -8  -1    2.33    0.66
   0  -8  -1    4.21    0.64
   0  -8  -1    4.71    0.75
   0   8   1    5.29    0.83
   0   8   1    4.59    1.55
  -1  -8  -1   29.49    1.45
  -1  -8  -1   29.40    1.21
  -1  -8  -1   29.21    1.45
   1   8   1   28.25    1.55
   1   8   1   27.87    1.41
   1   8   1   26.60    2.71
  -2  -8  -1   23.05    1.04
  -2  -8  -1   24.73    1.28
  -2  -8  -1   23.95    1.28
   2   8   1   25.91    1.30
   2   8   1   25.65    2.77
   2   8   1   23.57    1.44
  -3  -8  -1    1.07    0.46
  -3  -8  -1    1.13    0.39
  -3  -8  -1    0.95    0.47
   3   8   1    0.79    0.47
   3   8   1    1.88    0.67
   3   8   1    1.03    1.29
  -4  -8  -1   14.64    0.84
   4   8   1   15.05    1.29
   4   8   1   17.12    1.93
   4   8   1   15.65    2.34
   5   8   1   11.89    2.13
   5   8   1   12.16    1.22
   5   8   1   10.83    1.58
   5   8   1   11.34    1.71
   6   8   1    6.99    1.48
   6   8   1    5.14    1.24
   6   8   1    4.04    1.62
   6   8   1    5.88    0.98
   7   8   1   26.34    2.46
   7   8   1   28.27    1.76
   7   8   1   25.80    3.02
   8   8   1    9.58    1.64
   8   8   1   11.14    2.31
   8   8   1   14.36    1.49
   9   8   1    2.05    1.50
   9   8   1    3.86    1.03
   9   8   1    3.64    1.34
  10   8   1    4.22    1.12
  10   8   1    1.36    1.09
  10   8   1    3.07    1.71
  11   8   1    6.36    1.36
  11   8   1    5.60    2.02
  11   8   1    6.64    1.54
  12   8   1    0.71    1.19
  12   8   1    1.36    1.13
   7  -9  -1    1.93    1.01
   6  -9  -1   -0.27    0.67
   5  -9  -1    2.80    0.86
  -5   9   1    4.35    0.62
  -5   9   1    3.84    0.87
   4  -9  -1    3.12    0.82
  -4   9   1    2.57    0.82
   3  -9  -1   10.06    1.16
  -3   9   1    5.53    0.97
   2  -9  -1    0.66    0.62
   2  -9  -1    0.39    0.69
  -2   9   1   -0.03    0.65
   1  -9  -1   24.57    1.62
   1  -9  -1   23.78    1.35
  -1   9   1   25.89    1.64
   0  -9  -1   41.90    1.91
   0  -9  -1   42.61    1.67
   0   9   1   36.66    3.07
   0   9   1   39.54    1.95
  -1  -9  -1    3.32    0.75
  -1  -9  -1    1.88    0.52
   1   9   1    1.79    1.46
   1   9   1    2.82    0.78
  -2  -9  -1   12.84    0.89
  -2  -9  -1   12.74    1.14
   2   9   1   12.12    1.29
   2   9   1   14.98    2.37
  -3  -9  -1    5.06    0.58
  -3  -9  -1    3.92    0.73
   3   9   1    4.13    0.88
   3   9   1    4.45    1.67
  -4  -9  -1   10.60    0.68
  -4  -9  -1   10.50    0.84
   4   9   1    8.86    1.17
   4   9   1   11.72    2.16
   4   9   1    9.83    1.73
   4   9   1   10.02    1.68
   5   9   1   -0.21    1.09
   5   9   1    1.07    0.73
   5   9   1   -0.33    1.19
   5   9   1   -0.67    0.85
   6   9   1    5.18    1.07
   6   9   1    6.69    1.93
   6   9   1    5.61    1.33
   6   9   1    4.70    1.49
   7   9   1   58.65    2.57
   7   9   1   59.91    3.46
   7   9   1   54.97    3.95
   8   9   1    0.63    1.09
   8   9   1   -0.96    1.40
   8   9   1   -0.40    0.80
   9   9   1    1.87    1.68
   9   9   1    2.19    1.37
   9   9   1    3.03    1.05
  10   9   1    3.77    1.90
  10   9   1    3.84    1.41
  10   9   1    3.14    1.14
  11   9   1    6.41    2.17
  11   9   1    5.87    1.48
  11   9   1    5.52    1.56
   6 -10  -1    0.59    0.85
   5 -10  -1    3.43    1.01
  -5  10   1    1.24    0.54
   4 -10  -1    0.32    0.76
  -4  10   1    1.73    0.81
   3 -10  -1    0.98    0.74
  -3  10   1    0.58    0.74
   2 -10  -1    2.52    0.77
  -2  10   1    1.48    0.86
   1 -10  -1   26.66    1.52
   1 -10  -1   26.05    1.73
  -1  10   1   24.37    1.75
  -1  10   1   25.69    2.91
   0 -10  -1    2.44    0.80
   0 -10  -1    0.76    0.62
   0  10   1    1.27    0.81
   0  10   1    0.99    1.50
  -1 -10  -1    7.84    0.85
  -1 -10  -1    6.70    1.00
   1  10   1    9.44    1.21
   1  10   1    5.34    1.79
  -2 -10  -1    8.05    1.02
  -2 -10  -1    8.82    0.84
   2  10   1   10.72    2.17
   2  10   1    9.49    1.27
  -3 -10  -1    3.44    0.58
  -3 -10  -1    3.97    0.74
   3  10   1    1.75    1.56
   3  10   1    3.44    0.96
  -4 -10  -1    0.04    0.48
  -4 -10  -1    0.41    0.34
   4  10   1   -1.45    1.01
   4  10   1   -0.33    1.04
   4  10   1   -1.59    1.12
   4  10   1    0.13    0.78
   5  10   1    3.12    1.53
   5  10   1    0.56    0.83
   5  10   1    1.15    1.27
   6  10   1   17.94    1.74
   6  10   1   15.46    2.26
   6  10   1   20.46    2.90
   7  10   1    5.34    2.04
   7  10   1    6.92    1.23
   7  10   1    9.88    1.93
   8  10   1    5.44    1.67
   8  10   1    4.13    1.18
   8  10   1    4.74    2.07
   9  10   1    7.65    1.83
   9  10   1   10.08    2.39
   9  10   1   10.03    1.57
  10  10   1    8.74    1.55
  10  10   1    7.35    2.29
  10  10   1    9.85    1.95
  11  10   1    5.26    1.76
  11  10   1    2.66    1.30
   5 -11  -1   -0.15    0.84
  -5  11   1   -0.06    0.46
   4 -11  -1    0.40    0.79
  -4  11   1    0.30    0.84
   3 -11  -1   14.18    1.42
  -3  11   1   15.07    1.52
   2 -11  -1    0.87    0.76
  -2  11   1    0.48    0.85
   1 -11  -1   13.07    1.44
   1 -11  -1   11.04    1.16
  -1  11   1   13.19    1.53
   0 -11  -1    8.65    1.00
   0 -11  -1    9.28    1.21
   0  11   1    9.45    1.35
  -1 -11  -1    1.94    0.70
  -1 -11  -1    2.06    0.83
   1  11   1    1.84    1.62
   1  11   1    1.77    0.90
  -2 -11  -1    3.43    0.67
  -2 -11  -1    1.91    0.80
   2  11   1    0.85    0.80
   2  11   1    0.35    1.50
  -3 -11  -1    0.35    0.47
  -3 -11  -1    0.21    0.64
   3  11   1   -0.46    1.27
   3  11   1    0.41    0.84
  -4 -11  -1    3.34    0.54
  -4 -11  -1    2.95    0.68
   4  11   1    4.59    1.80
   4  11   1    3.15    1.04
   5  11   1   -0.14    1.30
   5  11   1    0.47    1.45
   5  11   1   -0.58    0.84
   6  11   1    5.89    1.73
   6  11   1   12.47    1.58
   6  11   1    8.47    2.21
   7  11   1    3.80    1.70
   7  11   1    6.86    1.39
   7  11   1    3.06    1.88
   8  11   1    8.33    1.54
   8  11   1    3.86    1.96
   8  11   1    4.45    1.71
   9  11   1    3.77    2.15
   9  11   1    4.98    1.75
   9  11   1    6.05    1.47
  10  11   1   -0.65    1.04
   3 -12  -1    8.68    1.27
  -3  12   1    9.92    1.43
   2 -12  -1    0.97    0.76
  -2  12   1   -0.27    0.88
   1 -12  -1    0.42    0.75
  -1  12   1    1.72    1.04
   0 -12  -1    1.73    0.69
   0 -12  -1    1.53    0.90
   0  12   1    3.16    1.13
  -1 -12  -1   -0.02    0.62
  -1 -12  -1   -0.19    0.79
   1  12   1    1.75    0.97
  -2 -12  -1    0.40    0.56
  -2 -12  -1    1.04    0.82
   2  12   1   -0.16    1.50
   2  12   1   -0.09    0.88
  -3 -12  -1    0.84    0.74
  -3 -12  -1    1.01    0.56
   3  12   1    0.01    1.45
   3  12   1   -0.50    0.84
  -4 -12  -1    1.04    0.62
   4  12   1   -0.26    1.49
   4  12   1    1.26    1.02
   5  12   1    2.23    1.84
   5  12   1    0.39    1.01
   6  12   1   -0.43    0.98
   6  12   1    1.69    1.76
   7  12   1    2.76    1.25
   7  12   1    3.62    1.91
   8  12   1    5.90    1.44
   8  12   1   11.00    2.69
   9  12   1   -1.43    1.08
   2 -13  -1   -0.32    0.81
  -2  13   1   -0.39    0.95
   1 -13  -1   12.23    1.29
  -1  13   1   12.11    1.65
   0 -13  -1    3.13    1.12
   0 -13  -1    4.36    0.93
   0  13   1    2.85    1.16
  -1 -13  -1    1.09    0.77
  -1 -13  -1    0.70    1.02
   1  13   1    0.92    1.03
  -2 -13  -1    2.96    0.76
  -2 -13  -1    3.53    1.07
   2  13   1    1.83    1.12
  -3 -13  -1    2.92    0.90
   3  13   1    2.73    1.22
   4  13   1    2.55    1.27
   4  13   1    3.58    1.88
   5  13   1    3.45    2.01
   5  13   1    0.77    1.24
   6  13   1    7.18    2.32
   6  13   1    5.70    1.48
   7  13   1   -0.37    1.85
   7  13   1    0.23    1.14
   8  13   1    0.52    1.20
   1  14   1    2.40    1.23
  -2 -14  -1   12.19    1.42
   2  14   1   11.36    1.76
  -3 -14  -1    0.59    0.83
   3  14   1    0.72    1.15
   4  14   1    0.83    1.25
   5  14   1    3.07    1.29
   4  14  -2   -0.17    1.06
  -4 -14   2   -0.06    0.85
   3  14  -2    2.92    1.24
  -3 -14   2    2.18    0.83
  -3 -14   2    4.34    1.20
   2  14  -2   14.04    1.82
  -2 -14   2   13.94    1.70
  -2 -14   2   14.21    1.36
   7  13  -2   -1.65    1.00
   7  13  -2    1.13    1.59
   6  13  -2    4.76    1.79
   6  13  -2    8.12    1.54
   5  13  -2    4.53    1.29
  -5 -13   2    4.18    0.99
   4  13  -2   -1.93    0.93
  -4 -13   2    1.44    0.91
  -4 -13   2   -0.51    0.61
   3  13  -2   37.96    2.57
  -3 -13   2   36.90    2.20
  -3 -13   2   41.62    1.89
   2  13  -2    8.42    1.50
  -2 -13   2    7.16    1.29
  -2 -13   2    8.47    1.11
   1  13  -2    0.87    1.02
  -1 -13   2    1.35    0.80
   0  13  -2   -0.28    0.98
   0 -13   2   -0.04    0.72
  -1  13  -2    1.98    1.01
   1 -13   2    2.30    0.90
   9  12  -2    0.21    1.74
   9  12  -2   -0.18    1.15
   8  12  -2    2.08    1.21
   8  12  -2    2.05    1.68
   7  12  -2   13.34    1.87
   7  12  -2   11.01    2.35
   6  12  -2    4.32    1.29
   6  12  -2    6.57    1.83
   5  12  -2   -0.89    0.90
   5  12  -2   -1.30    1.21
  -5 -12   2    1.53    0.81
  -5 -12   2    1.15    0.57
   4  12  -2   13.51    1.73
   4  12  -2   14.78    2.26
  -4 -12   2   15.66    1.49
  -4 -12   2   17.45    1.25
   3  12  -2    7.42    1.36
  -3 -12   2    7.28    0.96
  -3 -12   2    6.06    1.12
   2  12  -2    0.81    0.87
  -2 -12   2    0.89    0.88
  -2 -12   2    0.29    0.64
   1  12  -2    2.08    0.95
  -1 -12   2   -0.22    0.67
   0  12  -2    1.77    0.96
   0 -12   2    2.93    0.83
  -1  12  -2    0.78    0.88
   1 -12   2    2.36    0.92
  -2  12  -2   -0.11    0.78
   2 -12   2   -0.92    0.72
   3 -12   2    0.67    0.86
  10  11  -2    1.40    1.27
   9  11  -2    2.75    1.22
   9  11  -2    1.84    1.64
   8  11  -2    4.72    1.34
   8  11  -2    2.47    1.69
   7  11  -2    3.71    1.83
   7  11  -2    5.67    1.29
   6  11  -2    4.60    1.64
   6  11  -2    0.84    0.96
  -6 -11   2    2.41    0.75
  -6 -11   2    3.18    0.56
   5  11  -2   10.45    1.51
   5  11  -2    8.37    1.89
  -5 -11   2    9.64    1.14
  -5 -11   2   11.16    0.94
   4  11  -2    8.34    1.34
   4  11  -2   10.49    1.97
  -4 -11   2    7.78    1.10
  -4 -11   2    9.36    0.93
   3  11  -2    4.78    1.43
   3  11  -2    1.71    0.93
  -3 -11   2    3.56    0.73
  -3 -11   2    3.71    0.97
   2  11  -2    1.01    1.18
   2  11  -2    1.29    0.87
  -2 -11   2    1.39    0.84
  -2 -11   2    0.33    0.61
   1  11  -2   11.10    1.38
  -1 -11   2   12.53    1.48
  -1 -11   2   11.96    1.13
   0  11  -2    1.84    0.90
   0 -11   2    0.14    0.60
  -1  11  -2    0.05    0.77
   1 -11   2    0.19    0.62
  -2  11  -2    8.87    1.19
   2 -11   2    6.37    1.09
   3 -11   2   -0.24    0.73
   4 -11   2    0.86    0.84
   5 -11   2    0.80    0.94
  11  10  -2   -1.23    1.09
  10  10  -2    1.36    1.17
  10  10  -2    4.28    1.85
   9  10  -2    0.94    1.05
   9  10  -2    0.00    1.40
   8  10  -2    5.15    1.77
   8  10  -2    8.97    1.49
   7  10  -2    0.02    0.90
   7  10  -2   -0.63    1.14
   6  10  -2   -0.55    1.25
   6  10  -2   -0.79    0.80
  -6 -10   2    0.82    0.43
  -6 -10   2    0.88    0.59
   5  10  -2   41.44    2.26
   5  10  -2   39.93    3.05
  -5 -10   2   39.51    1.49
  -5 -10   2   41.10    1.86
   4  10  -2    4.45    1.48
   4  10  -2    3.23    0.91
  -4 -10   2    3.63    0.86
  -4 -10   2    3.74    0.65
   3  10  -2    2.69    1.35
   3  10  -2    4.95    1.01
  -3 -10   2    3.27    0.84
  -3 -10   2    4.87    0.74
   2  10  -2   18.90    1.65
   2  10  -2   18.21    2.09
  -2 -10   2   18.51    1.51
  -2 -10   2   23.26    1.29
   1  10  -2   23.88    2.07
   1  10  -2   24.72    1.74
  -1 -10   2   24.60    1.70
  -1 -10   2   26.65    1.41
   0  10  -2    1.24    0.80
   0 -10   2    1.47    0.67
  -1  10  -2    3.70    0.90
   1 -10   2    4.76    0.86
  -2  10  -2   10.74    1.20
   2 -10   2   11.39    1.23
  -3  10  -2   -0.65    0.47
  -3  10  -2   -0.94    0.61
   3 -10   2   -0.29    0.68
   4 -10   2    0.52    0.88
   5 -10   2    7.43    1.26
   6 -10   2    3.08    1.04
  11   9  -2    1.01    1.16
  10   9  -2   15.95    2.61
  10   9  -2   17.04    1.95
   9   9  -2    1.13    0.96
   9   9  -2    1.31    1.44
   9   9  -2    2.60    1.23
   8   9  -2    0.93    1.26
   8   9  -2   -0.26    1.03
   8   9  -2   -0.14    0.82
   7   9  -2    0.10    1.05
   7   9  -2   -0.15    0.77
   7   9  -2    0.36    1.19
   6   9  -2   24.00    2.41
   6   9  -2   29.90    2.69
   6   9  -2   24.65    1.81
  -6  -9   2   25.33    1.33
  -6  -9   2   27.90    1.10
   5   9  -2   10.35    1.32
   5   9  -2   11.80    1.92
   5   9  -2   10.76    1.87
  -5  -9   2    9.75    0.82
  -5  -9   2   11.37    1.07
   4   9  -2   -0.07    0.67
   4   9  -2    0.11    1.02
   4   9  -2    0.35    0.98
  -4  -9   2   -0.23    0.59
  -4  -9   2    0.18    0.42
   3   9  -2    0.77    1.10
   3   9  -2   -0.12    0.96
   3   9  -2    0.85    0.66
   3   9  -2    0.82    0.73
  -3  -9   2    1.13    0.51
  -3  -9   2    0.96    0.67
   2   9  -2   26.43    2.53
   2   9  -2   22.76    1.57
   2   9  -2   23.01    2.12
  -2  -9   2   21.24    1.45
  -2  -9   2   22.29    1.21
   1   9  -2   13.24    1.31
   1   9  -2   12.94    1.65
  -1  -9   2   13.30    1.28
  -1  -9   2   12.45    1.00
  -1  -9   2   12.73    1.22
   0   9  -2    0.66    0.90
   0   9  -2    0.14    0.69
   0  -9   2    0.53    0.48
   0  -9   2    0.54    0.61
   0  -9   2   -0.10    0.51
  -1   9  -2   44.92    2.03
   1  -9   2   43.87    2.02
   1  -9   2   45.15    1.87
  -2   9  -2    4.02    0.69
  -2   9  -2    3.84    0.82
   2  -9   2    5.47    0.99
   2  -9   2    3.70    0.84
  -3   9  -2    0.76    0.63
  -3   9  -2    0.62    0.52
   3  -9   2    0.92    0.73
   3  -9   2    0.91    0.77
   4  -9   2   16.44    1.50
   5  -9   2   21.85    1.69
   6  -9   2    0.16    0.84
   7  -9   2    0.85    0.98
  12   8  -2    2.06    1.32
  11   8  -2    2.38    1.23
  11   8  -2    4.24    1.82
  10   8  -2    2.07    1.57
  10   8  -2    5.06    1.46
  10   8  -2    2.27    1.10
   9   8  -2    2.27    1.00
   9   8  -2    0.31    0.96
   9   8  -2    2.02    1.37
   8   8  -2   -0.23    0.90
   8   8  -2    0.38    0.82
   8   8  -2    1.97    1.31
   7   8  -2    0.10    0.71
   7   8  -2   -0.64    1.03
   7   8  -2    0.36    1.04
   6   8  -2    5.41    0.99
   6   8  -2    5.83    1.36
   6   8  -2    5.85    1.60
  -6  -8   2    5.42    0.74
  -6  -8   2    7.21    0.62
   5   8  -2    0.42    0.66
   5   8  -2    1.96    1.18
   5   8  -2   -0.49    0.56
   5   8  -2    0.46    0.92
  -5  -8   2    0.63    0.38
  -5  -8   2    0.10    0.48
   4   8  -2    0.69    0.65
   4   8  -2    0.57    1.01
   4   8  -2    0.10    0.61
   4   8  -2    0.40    0.96
  -4  -8   2    0.84    0.54
  -4  -8   2    0.43    0.40
  -4  -8   2    0.76    0.54
   3   8  -2   11.36    1.05
   3   8  -2   12.63    1.73
   3   8  -2   10.46    1.12
  -3  -8   2   10.45    1.04
  -3  -8   2   12.40    0.85
  -3  -8   2   11.35    1.07
   2   8  -2    1.97    1.02
   2   8  -2    5.11    1.21
   2   8  -2    4.92    0.80
  -2  -8   2    3.54    0.57
  -2  -8   2    3.78    0.69
  -2  -8   2    4.91    0.78
   1   8  -2   19.97    2.13
   1   8  -2   19.68    1.38
   1   8  -2   20.96    1.19
   1   8  -2   20.50    1.81
  -1  -8   2   21.24    1.14
  -1  -8   2   21.64    1.36
  -1  -8   2   23.09    1.36
   0   8  -2    0.51    0.75
   0   8  -2    0.60    0.43
   0   8  -2    0.50    0.59
   0  -8   2    0.57    0.36
   0  -8   2    0.50    0.44
   0  -8   2    0.72    0.58
  -1   8  -2   13.27    1.32
  -1   8  -2   14.60    1.24
  -1   8  -2   13.74    1.01
   1  -8   2   16.16    1.24
   1  -8   2   10.63    1.16
   1  -8   2   13.52    1.07
  -2   8  -2    0.12    0.45
  -2   8  -2    0.36    0.54
   2  -8   2   -0.28    0.57
   2  -8   2    0.34    0.56
  -3   8  -2    3.26    0.58
  -3   8  -2    2.72    0.67
   3  -8   2    3.60    0.77
   3  -8   2    3.00    0.76
   4  -8   2   37.38    1.86
   4  -8   2   42.37    2.05
   5  -8   2    1.96    0.79
   5  -8   2    3.35    0.90
   6  -8   2    3.73    0.95
   6  -8   2    5.68    1.07
   7  -8   2    4.69    1.09
   8  -8   2    5.15    1.19
  12   7  -2    9.66    1.57
  11   7  -2    4.02    1.25
  11   7  -2    3.88    1.79
  11   7  -2    2.66    1.20
  10   7  -2    1.88    1.00
  10   7  -2    3.00    1.24
  10   7  -2    2.15    1.37
   9   7  -2    0.69    0.83
   9   7  -2    0.80    0.97
   9   7  -2    0.73    1.16
  -9  -7   2   -2.09    1.12
   8   7  -2    1.94    1.28
   8   7  -2    0.96    0.77
   8   7  -2   -0.18    0.90
   7   7  -2    3.23    1.11
   7   7  -2    3.14    0.82
   7   7  -2    3.34    1.27
   6   7  -2    0.62    0.60
   6   7  -2    0.18    0.81
   6   7  -2    2.68    1.15
  -6  -7   2   -0.06    0.41
  -6  -7   2    0.04    0.28
   5   7  -2    0.78    0.89
   5   7  -2    0.57    0.43
   5   7  -2    0.71    0.61
   5   7  -2    0.90    1.03
   5   7  -2    1.90    0.68
  -5  -7   2    0.97    0.35
  -5  -7   2    0.79    0.52
  -5  -7   2    1.41    0.53
   4   7  -2   -0.35    0.38
   4   7  -2    1.53    0.64
   4   7  -2    0.47    0.43
   4   7  -2   -0.34    0.70
   4   7  -2    0.51    0.92
  -4  -7   2    1.66    0.52
  -4  -7   2    1.09    0.51
  -4  -7   2    0.96    0.38
   3   7  -2   19.79    1.31
   3   7  -2   15.53    1.00
   3   7  -2   18.98    1.96
   3   7  -2   17.72    1.08
   3   7  -2   17.76    1.23
  -3  -7   2   19.70    1.14
  -3  -7   2   18.24    0.91
  -3  -7   2   18.58    1.15
   2   7  -2    2.52    0.94
   2   7  -2    3.47    0.59
   2   7  -2    3.06    0.98
   2   7  -2    3.33    0.55
  -2  -7   2    2.49    0.59
  -2  -7   2    2.59    0.56
  -2  -7   2    2.64    0.48
   1   7  -2   10.88    0.84
   1   7  -2   11.49    1.04
   1   7  -2   10.42    1.33
   1   7  -2   10.64    1.47
  -1  -7   2   10.28    1.50
  -1  -7   2   10.71    1.00
  -1  -7   2   11.67    1.01
   0   7  -2   36.38    1.59
   0   7  -2   38.95    1.47
   0   7  -2   35.48    1.86
   0  -7   2   38.32    1.64
   0  -7   2   39.31    2.35
   0  -7   2   31.33    1.47
  -1   7  -2    0.73    0.41
  -1   7  -2    0.75    0.54
  -1   7  -2    1.07    0.69
   1  -7   2    1.05    0.49
   1  -7   2    1.39    0.57
   1  -7   2    0.49    0.50
   1  -7   2    1.21    0.84
  -2   7  -2    0.03    0.39
  -2   7  -2    0.30    0.49
   2  -7   2    0.54    0.54
   2  -7   2    1.55    0.59
   2  -7   2    0.40    0.51
  -3   7  -2   58.50    1.97
  -3   7  -2   61.28    1.81
   3  -7   2   61.25    2.12
   3  -7   2   61.13    2.26
   4  -7   2    4.14    0.80
   4  -7   2    3.98    0.81
   5  -7   2    6.36    0.93
   5  -7   2    7.10    1.06
   6  -7   2   11.11    1.24
   6  -7   2   13.03    1.45
   7  -7   2   10.62    1.34
   7  -7   2    8.36    1.22
   8  -7   2    6.66    1.39
   8  -7   2    5.88    1.19
   9  -7   2    2.16    1.01
  12   6  -2   14.15    2.45
  12   6  -2   22.09    2.16
  11   6  -2    8.54    2.08
  11   6  -2    9.13    1.49
  11   6  -2    6.48    1.49
  10   6  -2    2.93    1.05
  10   6  -2    2.15    1.08
  10   6  -2    3.19    1.36
   9   6  -2   11.71    1.39
   9   6  -2   12.74    1.66
   9   6  -2   11.47    1.96
  -9  -6   2   10.56    2.16
   8   6  -2    0.75    0.94
   8   6  -2    2.39    0.96
   8   6  -2    2.48    0.83
  -8  -6   2    0.83    1.07
   7   6  -2    0.58    0.71
   7   6  -2   -0.30    0.58
   7   6  -2   -0.62    0.86
  -7  -6   2    0.17    0.89
   6   6  -2   15.46    1.63
   6   6  -2   14.07    1.05
   6   6  -2   16.25    1.33
   6   6  -2   16.39    2.03
  -6  -6   2   14.19    1.08
  -6  -6   2   15.10    0.89
  -6  -6   2   14.22    0.80
  -6  -6   2   15.40    1.86
   5   6  -2    2.78    0.57
   5   6  -2    1.68    0.79
   5   6  -2    2.64    0.67
   5   6  -2    2.62    1.07
  -5  -6   2    3.22    0.43
  -5  -6   2    3.28    0.57
  -5  -6   2    3.29    0.62
   4   6  -2   28.28    2.11
   4   6  -2   29.01    1.42
   4   6  -2   29.24    1.94
   4   6  -2   28.09    1.29
  -4  -6   2   25.61    1.21
  -4  -6   2   26.06    0.99
  -4  -6   2   27.21    1.30
   3   6  -2    0.98    0.79
   3   6  -2   -0.49    0.30
   3   6  -2    0.94    0.37
   3   6  -2    0.57    0.47
   3   6  -2    0.53    0.49
   3   6  -2    0.52    0.69
  -3  -6   2    0.19    0.40
  -3  -6   2    1.04    0.41
  -3  -6   2    0.23    0.30
   2   6  -2    1.05    0.59
   2   6  -2    0.57    0.39
   2   6  -2    0.46    0.35
   2   6  -2   -0.07    0.65
   2   6  -2    0.51    0.75
   2   6  -2    1.02    0.39
  -2  -6   2    0.78    0.33
  -2  -6   2    0.89    0.39
  -2  -6   2    0.31    0.42
   1   6  -2   46.71    1.60
   1   6  -2   43.08    1.50
   1   6  -2   44.21    1.66
   1   6  -2   44.80    2.33
  -1  -6   2   44.00    1.63
  -1  -6   2   47.80    1.68
   0   6  -2    4.68    0.68
   0   6  -2    5.30    0.88
   0   6  -2    4.92    0.60
   0  -6   2    5.66    0.67
   0  -6   2    4.17    0.95
   0  -6   2    4.41    0.55
   0  -6   2    5.27    0.74
  -1   6  -2    1.39    0.68
  -1   6  -2    2.02    0.53
  -1   6  -2    2.01    0.45
   1  -6   2    1.22    0.50
   1  -6   2    1.22    0.46
   1  -6   2    2.22    0.81
   1  -6   2    2.40    0.54
  -2   6  -2    2.39    0.56
  -2   6  -2    1.31    0.40
   2  -6   2    2.16    0.52
   2  -6   2    2.01    0.57
   2  -6   2    2.52    0.87
   2  -6   2    1.32    0.52
  -3   6  -2   28.70    1.07
  -3   6  -2   26.16    1.18
   3  -6   2   24.14    1.94
   3  -6   2   25.11    1.29
   3  -6   2   30.24    1.46
   3  -6   2   24.77    1.37
   4  -6   2    1.22    0.62
   4  -6   2    0.77    0.53
   5  -6   2    9.41    1.01
   5  -6   2    7.79    0.97
   6  -6   2   31.22    1.81
   6  -6   2   31.42    1.69
   7  -6   2   -0.18    0.64
   7  -6   2   -0.85    0.61
   8  -6   2    5.21    1.05
   8  -6   2    7.02    1.23
   9  -6   2   16.56    1.76
   9  -6   2   16.59    1.64
  12   5  -2    4.63    1.21
  12   5  -2    4.19    1.21
  12   5  -2    3.47    1.67
  12   5  -2    4.86    1.33
  11   5  -2    2.31    0.97
  11   5  -2    3.24    1.10
  11   5  -2    2.28    1.40
  10   5  -2   14.72    1.56
  10   5  -2   12.74    1.66
  10   5  -2   12.39    2.10
   9   5  -2   14.47    1.67
   9   5  -2   15.74    2.18
   9   5  -2   18.16    1.63
  -9  -5   2   13.85    2.21
   8   5  -2   25.90    1.96
   8   5  -2   27.18    1.65
   8   5  -2   26.05    2.33
  -8  -5   2   26.40    2.60
   7   5  -2   54.78    2.16
   7   5  -2   56.33    2.60
   7   5  -2   53.25    3.00
  -7  -5   2   55.19    3.11
   6   5  -2   14.74    1.49
   6   5  -2   15.67    1.90
   6   5  -2   14.25    1.02
   6   5  -2   14.51    1.14
  -6  -5   2   14.96    0.76
  -6  -5   2   14.87    0.68
  -6  -5   2   14.42    0.81
  -6  -5   2   15.14    1.05
  -6  -5   2   15.14    1.78
   5   5  -2    0.81    0.78
   5   5  -2    1.36    0.47
   5   5  -2   -0.14    0.58
   5   5  -2    0.32    0.46
  -5  -5   2    0.46    0.27
  -5  -5   2    1.09    0.80
  -5  -5   2    0.94    0.43
  -5  -5   2    0.62    0.36
   4   5  -2    1.33    0.61
   4   5  -2    1.12    0.39
   4   5  -2    2.28    0.90
   4   5  -2    0.95    0.48
  -4  -5   2    0.93    0.30
  -4  -5   2    1.04    0.40
  -4  -5   2    1.41    0.44
   3   5  -2   22.76    1.18
   3   5  -2   19.81    1.49
   3   5  -2   21.56    0.97
   3   5  -2   22.40    1.05
   3   5  -2   21.97    1.67
   3   5  -2   21.56    1.13
  -3  -5   2   20.94    1.05
  -3  -5   2   21.61    1.02
  -3  -5   2   22.20    0.86
   2   5  -2   18.42    0.88
   2   5  -2   15.84    0.98
   2   5  -2   16.94    1.52
   2   5  -2   16.75    1.40
   2   5  -2   17.88    1.09
   2   5  -2   18.75    0.93
  -2  -5   2   17.42    0.78
  -2  -5   2   18.84    0.96
  -2  -5   2   16.97    0.92
   1   5  -2   12.73    1.22
   1   5  -2   10.94    0.73
   1   5  -2   12.06    0.73
   1   5  -2   11.74    0.85
   1   5  -2   10.65    1.25
  -1  -5   2   10.13    0.77
  -1  -5   2   11.15    0.68
  -1  -5   2   11.14    0.80
   0   5  -2   23.23    0.98
   0   5  -2   22.86    1.09
   0   5  -2   24.19    1.02
   0   5  -2   24.81    1.40
   0  -5   2   22.20    1.07
   0  -5   2   21.30    1.03
   0  -5   2   23.59    0.98
  -1   5  -2   15.14    1.07
  -1   5  -2   15.48    0.80
  -1   5  -2   16.12    0.92
   1  -5   2   17.25    1.56
   1  -5   2   15.08    0.85
   1  -5   2   13.98    0.92
  -2   5  -2    3.29    0.45
  -2   5  -2    3.85    0.53
   2  -5   2    3.99    0.58
   2  -5   2    4.32    0.58
   2  -5   2    4.42    0.92
   2  -5   2    3.08    0.56
   3  -5   2    0.28    0.67
   3  -5   2   -0.01    0.41
   3  -5   2    0.21    0.37
   3  -5   2    0.24    0.40
   4  -5   2    6.07    1.16
   4  -5   2    5.62    0.73
   4  -5   2    7.43    0.86
   4  -5   2    7.38    0.84
   5  -5   2   27.18    1.48
   5  -5   2   26.16    1.38
   6  -5   2   33.02    1.62
   6  -5   2   35.08    1.75
   7  -5   2    0.80    0.67
   7  -5   2    0.73    0.62
   8  -5   2    1.80    0.76
   8  -5   2    4.70    0.98
   9  -5   2   21.91    1.80
   9  -5   2   21.19    1.70
  10  -5   2    3.22    1.08
  10  -5   2    2.75    1.05
  12   4  -2    5.96    1.28
  12   4  -2    4.33    1.35
  12   4  -2    6.18    1.85
  11   4  -2    7.75    1.30
  11   4  -2    8.00    1.92
  11   4  -2   10.35    1.43
  11   4  -2    6.97    1.29
  10   4  -2    5.12    1.56
  10   4  -2    3.93    1.02
  10   4  -2    5.70    1.09
   9   4  -2   14.88    1.56
   9   4  -2   14.42    2.10
   9   4  -2   16.82    1.52
  -9  -4   2   13.84    2.19
   8   4  -2    2.91    0.92
   8   4  -2    3.96    1.26
   8   4  -2    4.48    0.86
  -8  -4   2    3.10    1.22
   7   4  -2    4.16    1.15
   7   4  -2    6.44    0.84
   7   4  -2    7.66    0.95
   7   4  -2    6.02    1.01
  -7  -4   2    7.17    1.37
  -7  -4   2    6.86    0.87
   6   4  -2    9.70    1.13
   6   4  -2   10.34    0.89
   6   4  -2   10.49    1.00
  -6  -4   2    8.79    1.31
  -6  -4   2   10.99    0.97
  -6  -4   2    9.21    0.62
  -6  -4   2    9.56    0.64
   5   4  -2    1.78    0.62
   5   4  -2    2.27    0.56
   5   4  -2    1.56    0.43
   5   4  -2    3.19    0.91
  -5  -4   2    1.75    0.30
  -5  -4   2    0.37    0.69
  -5  -4   2    1.68    0.39
  -5  -4   2    1.71    0.35
  -5  -4   2    1.83    0.48
   4   4  -2   41.54    1.47
   4   4  -2   40.23    2.15
   4   4  -2   45.40    1.56
  -4  -4   2   42.94    1.20
  -4  -4   2   43.85    1.36
  -4  -4   2   43.71    2.04
  -4  -4   2   40.89    1.50
   3   4  -2  137.56    4.18
   3   4  -2  132.34    3.21
   3   4  -2  135.74    3.04
   3   4  -2  134.25    3.84
   3   4  -2  131.29    3.21
   3   4  -2  137.79    3.44
  -3  -4   2  134.11    3.25
  -3  -4   2  130.09    3.73
  -3  -4   2  134.45    2.89
  -3  -4   2  136.70    3.07
   2   4  -2    0.66    0.51
   2   4  -2    1.16    0.36
   2   4  -2    1.69    0.70
   2   4  -2    1.88    0.46
   2   4  -2    2.07    0.35
   2   4  -2    1.14    0.44
  -2  -4   2    2.03    0.40
  -2  -4   2    2.45    0.89
  -2  -4   2    1.88    0.32
  -2  -4   2    1.99    0.40
   1   4  -2   69.92    2.40
   1   4  -2   72.21    1.92
   1   4  -2   74.40    1.85
   1   4  -2   72.99    2.56
  -1  -4   2   72.93    1.91
  -1  -4   2   69.49    1.94
  -1  -4   2   68.70    2.67
  -1  -4   2   74.96    1.80
   0   4  -2   53.43    1.83
   0   4  -2   52.60    2.14
   0   4  -2   55.76    1.60
   0   4  -2   52.90    1.55
   0   4  -2   53.47    1.47
   0  -4   2   55.35    1.59
   0  -4   2   56.22    1.50
   0  -4   2   52.15    1.59
  -1   4  -2  119.95    2.87
  -1   4  -2  120.47    2.68
  -1   4  -2  123.75    2.80
   1  -4   2  123.11    2.87
   1  -4   2  121.84    2.76
   1  -4   2  121.04    2.93
  -2   4  -2    2.46    0.34
   2  -4   2    1.77    0.43
   2  -4   2    2.78    0.49
   2  -4   2    0.96    0.69
   2  -4   2    1.64    0.40
   3  -4   2   19.67    0.94
   3  -4   2   18.96    1.00
   3  -4   2   18.00    0.98
   3  -4   2   18.48    1.49
   4  -4   2    2.32    0.50
   4  -4   2    2.37    0.51
   4  -4   2    2.77    0.83
   4  -4   2    1.98    0.50
  -5   4  -2    8.55    1.04
   5  -4   2    8.36    0.85
   5  -4   2    9.15    0.85
   5  -4   2    8.57    1.26
   6  -4   2    0.91    0.55
   6  -4   2    0.54    0.52
  -7   4  -2    1.11    1.13
   7  -4   2    0.76    0.60
   7  -4   2   -0.12    0.54
   8  -4   2   11.76    1.26
   8  -4   2   10.55    1.17
   9  -4   2    3.02    0.91
   9  -4   2    1.35    0.78
  10  -4   2   13.38    1.59
  10  -4   2   13.01    1.47
  11  -4   2    1.24    1.09
  11  -4   2    0.40    0.86
  12   3  -2   -0.20    0.89
  12   3  -2   -1.86    0.82
  12   3  -2    1.57    1.41
  11   3  -2    6.49    1.65
  11   3  -2    7.80    1.36
  11   3  -2    9.33    1.36
  10   3  -2    3.66    0.92
  10   3  -2    2.74    1.25
  10   3  -2    2.86    0.91
  10   3  -2    1.95    0.90
   9   3  -2    2.08    0.85
   9   3  -2    3.03    0.85
   9   3  -2    4.73    1.31
  -9  -3   2    4.79    1.42
   8   3  -2    7.53    1.02
   8   3  -2    8.48    1.15
   8   3  -2    7.04    1.44
  -8  -3   2    5.86    1.39
   7   3  -2    3.75    0.73
   7   3  -2    2.48    0.76
   7   3  -2    2.74    1.02
   7   3  -2    3.37    0.66
  -7  -3   2    4.02    0.74
  -7  -3   2    2.56    1.06
   6   3  -2    3.28    0.63
   6   3  -2    3.10    0.76
   6   3  -2    2.02    0.54
   6   3  -2    1.44    0.81
  -6  -3   2    2.75    0.58
  -6  -3   2    2.99    0.96
   5   3  -2   19.85    1.05
   5   3  -2   18.55    1.28
   5   3  -2   19.81    1.04
  -5  -3   2   18.22    0.81
  -5  -3   2   18.15    0.80
  -5  -3   2   18.54    1.51
  -5  -3   2   18.27    0.70
  -5  -3   2   20.34    1.08
   4   3  -2   76.88    2.16
   4   3  -2   75.09    2.88
   4   3  -2   79.79    2.20
  -4  -3   2   78.99    1.95
  -4  -3   2   75.76    2.70
  -4  -3   2   77.93    2.20
  -4  -3   2   84.59    2.73
  -4  -3   2   78.49    1.80
   3   3  -2   10.93    0.75
   3   3  -2   10.38    0.69
   3   3  -2   10.39    1.14
   3   3  -2    9.12    0.93
   3   3  -2   10.68    0.60
  -3  -3   2   11.26    1.00
  -3  -3   2   11.88    1.10
  -3  -3   2   10.53    0.64
  -3  -3   2   10.44    0.52
  -3  -3   2   10.22    0.72
   2   3  -2  126.26    2.88
   2   3  -2  123.52    2.90
   2   3  -2  121.56    3.38
   2   3  -2  124.01    2.73
   2   3  -2  127.83    3.60
  -2  -3   2  126.10    3.77
  -2  -3   2  133.55    3.55
  -2  -3   2  127.16    3.19
  -2  -3   2  131.18    2.97
  -2  -3   2  129.26    2.79
   1   3  -2    1.26    0.52
   1   3  -2    1.73    0.30
   1   3  -2    1.27    0.30
   1   3  -2    1.08    0.57
  -1  -3   2   -0.14    0.55
  -1  -3   2    1.43    0.33
  -1  -3   2    1.31    0.31
  -1  -3   2    1.19    0.27
   0   3  -2    0.20    0.23
   0   3  -2    0.30    0.48
   0   3  -2   -0.13    0.35
   0   3  -2   -0.13    0.21
   0   3  -2    0.35    0.27
   0  -3   2    0.43    0.26
   0  -3   2    0.14    0.25
   0  -3   2    0.06    0.25
   0  -3   2    0.14    0.49
  -1   3  -2    9.62    0.48
  -1   3  -2    8.42    0.48
  -1   3  -2    9.71    0.56
  -1   3  -2    8.85    0.55
   1  -3   2   10.44    0.58
   1  -3   2    9.08    0.58
   1  -3   2    9.27    0.58
  -2   3  -2    8.08    0.55
   2  -3   2    7.53    0.58
   2  -3   2    6.80    0.56
   2  -3   2    8.93    0.99
  -3   3  -2    8.61    0.69
   3  -3   2    8.19    0.65
   3  -3   2    7.80    0.64
   3  -3   2    7.68    0.61
   3  -3   2    7.59    0.96
  -4   3  -2    2.17    0.57
   4  -3   2    2.06    0.39
   4  -3   2    2.51    0.45
   4  -3   2    1.50    0.64
   4  -3   2    1.74    0.43
  -5   3  -2    1.52    0.71
   5  -3   2    1.72    0.70
   5  -3   2    1.67    0.46
   5  -3   2    1.95    0.49
   5  -3   2    2.41    0.52
  -6   3  -2   54.48    2.88
   6  -3   2   52.69    1.91
   6  -3   2   49.41    1.76
   6  -3   2   53.05    1.92
   6  -3   2   46.97    2.34
  -7   3  -2    4.64    1.38
   7  -3   2    4.44    0.78
   7  -3   2    4.50    0.72
   7  -3   2    4.27    0.79
   8  -3   2    1.71    0.72
   8  -3   2    0.80    0.64
   8  -3   2    0.54    0.65
   9  -3   2    6.54    0.99
   9  -3   2    6.15    1.03
  10  -3   2    2.51    0.87
  10  -3   2    1.18    0.84
  11  -3   2    5.84    1.23
  11  -3   2    5.45    1.24
  12   2  -2    8.18    1.39
  12   2  -2    8.41    1.86
  12   2  -2    4.16    1.32
  11   2  -2    2.81    1.32
  11   2  -2    3.08    0.93
  11   2  -2    5.06    1.12
  10   2  -2    0.41    0.74
  10   2  -2    0.33    0.65
  10   2  -2   -0.79    0.95
   9   2  -2    2.77    0.86
   9   2  -2    2.88    0.85
   9   2  -2    4.47    0.93
   9   2  -2    3.66    1.23
   8   2  -2    7.79    1.05
   8   2  -2    7.42    1.00
   8   2  -2    9.95    1.54
  -8  -2   2    4.63    1.35
   7   2  -2   14.15    1.10
   7   2  -2   15.08    1.24
   7   2  -2   13.02    1.64
   7   2  -2   13.38    1.07
  -7  -2   2   13.25    1.11
  -7  -2   2   14.38    1.72
   6   2  -2    2.30    0.87
   6   2  -2    2.26    0.57
   6   2  -2    4.05    0.75
   6   2  -2    3.07    0.56
  -6  -2   2    3.27    0.92
  -6  -2   2    3.89    0.68
   5   2  -2   74.01    2.87
   5   2  -2   76.80    2.16
   5   2  -2   68.70    2.19
   5   2  -2   75.49    2.46
  -5  -2   2   73.81    1.73
  -5  -2   2   75.59    2.27
  -5  -2   2   76.19    2.82
  -5  -2   2   75.06    1.82
  -5  -2   2   76.71    1.86
   4   2  -2   22.09    1.03
   4   2  -2   24.09    1.07
   4   2  -2   22.53    1.22
   4   2  -2   22.68    1.47
  -4  -2   2   23.39    0.86
  -4  -2   2   24.65    1.35
  -4  -2   2   24.47    0.80
  -4  -2   2   24.65    1.10
  -4  -2   2   23.95    0.89
  -4  -2   2   23.68    1.39
   3   2  -2    1.74    0.38
   3   2  -2    2.28    0.53
   3   2  -2    1.96    0.42
   3   2  -2    2.16    0.32
  -3  -2   2    2.06    0.52
  -3  -2   2    1.61    0.54
  -3  -2   2    1.80    0.31
  -3  -2   2    2.18    0.41
   2   2  -2  912.43   19.76
   2   2  -2  905.33   17.28
   2   2  -2  940.31   18.42
   2   2  -2  922.60   18.08
   2   2  -2  954.54   17.14
  -2  -2   2  937.05   17.16
  -2  -2   2  923.33   19.91
  -2  -2   2  948.54   18.11
  -2  -2   2  940.36   19.10
  -2  -2   2  949.66   18.51
   1   2  -2   52.10    1.38
   1   2  -2   53.00    1.68
   1   2  -2   53.99    1.28
   1   2  -2   53.60    1.71
  -1  -2   2   56.13    1.79
  -1  -2   2   54.98    1.80
  -1  -2   2   54.59    1.32
  -1  -2   2   54.92    1.41
  -1  -2   2   53.62    1.27
   0   2  -2    0.69    0.23
   0   2  -2    0.64    0.22
   0   2  -2    0.22    0.26
   0   2  -2    0.25    0.42
   0   2  -2    0.52    0.28
   0   2  -2    0.30    0.19
   0  -2   2    0.75    0.28
   0  -2   2    0.46    0.23
   0  -2   2    0.54    0.37
   0  -2   2    0.68    0.50
   0  -2   2    0.52    0.24
   0  -2   2    0.27    0.23
  -1   2  -2    4.65    0.36
  -1   2  -2    4.59    0.59
   1  -2   2    3.96    0.38
   1  -2   2    4.96    0.37
   1  -2   2    4.78    0.39
   1  -2   2    4.42    0.36
  -2   2  -2    9.63    0.50
   2  -2   2    8.41    0.52
   2  -2   2    9.73    0.49
   2  -2   2    9.50    0.48
   2  -2   2   10.19    0.88
  -3   2  -2   56.98    1.89
   3  -2   2   60.69    1.63
   3  -2   2   62.44    2.09
   3  -2   2   59.05    1.47
   3  -2   2   57.47    1.61
  -4   2  -2    3.50    0.75
   4  -2   2    3.32    0.49
   4  -2   2    2.33    0.48
   4  -2   2    3.35    0.44
   4  -2   2    2.93    0.68
  -5   2  -2   24.67    1.80
   5  -2   2   24.54    1.14
   5  -2   2   25.79    1.51
   5  -2   2   25.69    1.24
   5  -2   2   27.03    1.07
  -6   2  -2   13.98    1.69
   6  -2   2   14.67    1.02
   6  -2   2   13.36    0.92
   6  -2   2   14.10    1.35
   6  -2   2   14.04    1.12
  -7   2  -2    7.45    1.54
   7  -2   2    7.29    1.11
   7  -2   2    6.53    0.84
   7  -2   2    6.89    0.80
   7  -2   2    6.85    1.01
   8  -2   2    4.21    0.79
   8  -2   2    5.42    1.01
   8  -2   2    5.35    0.85
   9  -2   2    0.88    0.64
   9  -2   2    2.22    0.90
   9  -2   2    1.17    0.67
  10  -2   2    3.08    0.90
  10  -2   2    4.49    0.97
  11  -2   2    4.06    1.04
  11  -2   2    0.43    0.90
  12   1  -2    1.34    1.22
  12   1  -2   -0.42    0.98
  12   1  -2    1.12    0.98
  11   1  -2   -0.90    0.75
  11   1  -2    0.03    1.05
  11   1  -2    1.47    0.84
  10   1  -2    4.18    1.26
  10   1  -2    3.69    0.94
  10   1  -2    3.20    0.96
   9   1  -2   30.36    2.28
   9   1  -2   30.66    1.87
   9   1  -2   29.66    1.72
   8   1  -2    5.77    0.90
   8   1  -2    6.10    1.27
   8   1  -2    6.40    0.98
  -8  -1   2    6.24    1.38
   7   1  -2   15.50    1.19
   7   1  -2   16.42    1.16
   7   1  -2   17.62    1.16
   7   1  -2   19.09    1.31
   7   1  -2   15.94    1.69
  -7  -1   2   19.95    1.96
  -7  -1   2   16.23    1.28
   6   1  -2   47.57    1.89
   6   1  -2   46.83    1.72
   6   1  -2   48.37    1.72
   6   1  -2   49.40    2.31
   6   1  -2   46.81    1.83
  -6  -1   2   44.89    1.87
   5   1  -2  104.63    2.71
   5   1  -2  108.24    3.50
   5   1  -2  111.42    3.03
   5   1  -2  109.21    2.94
  -5  -1   2  105.63    2.37
  -5  -1   2  103.16    2.33
  -5  -1   2  106.03    2.99
  -5  -1   2  109.23    2.47
   4   1  -2   20.65    1.04
   4   1  -2   21.49    1.38
   4   1  -2   20.86    1.10
   4   1  -2   21.09    0.97
  -4  -1   2   22.50    1.20
  -4  -1   2   21.35    1.08
  -4  -1   2   22.69    0.79
  -4  -1   2   20.85    0.85
   3   1  -2   27.06    1.15
   3   1  -2   25.12    1.33
   3   1  -2   26.39    0.99
   3   1  -2   27.13    0.84
   3   1  -2   27.08    1.04
  -3  -1   2   27.39    0.80
  -3  -1   2   27.62    0.90
  -3  -1   2   28.62    1.44
  -3  -1   2   27.39    1.20
  -3  -1   2   27.85    0.86
  -3  -1   2   25.61    1.07
   2   1  -2  975.51   17.66
   2   1  -2  972.05   17.81
   2   1  -2  977.78   18.69
   2   1  -2  977.44   18.84
  -2  -1   2  974.49   17.68
  -2  -1   2  958.22   18.70
  -2  -1   2 1000.00   18.91
  -2  -1   2  886.26   17.61
  -2  -1   2  979.43   20.38
   1   1  -2    2.52    0.24
   1   1  -2    2.44    0.24
   1   1  -2    2.57    0.29
   1   1  -2    1.81    0.36
   1   1  -2    1.97    0.41
  -1  -1   2    1.84    0.30
  -1  -1   2    2.15    0.40
  -1  -1   2    2.19    0.24
  -1  -1   2    2.43    0.43
  -1  -1   2    2.19    0.24
  -1  -1   2    2.11    0.30
   0   1  -2    3.23    0.22
   0   1  -2    2.48    0.32
   0   1  -2    3.11    0.25
   0   1  -2    3.53    0.25
   0   1  -2    2.65    0.18
   0   1  -2    3.04    0.29
   0  -1   2    3.16    0.29
   0  -1   2    3.70    0.25
   0  -1   2    3.27    0.27
   0  -1   2    2.54    0.33
   0  -1   2    2.41    0.36
   0  -1   2    2.58    0.21
   0  -1   2    2.60    0.24
  -1   1  -2   34.10    1.24
   1  -1   2   35.72    1.09
  -2   1  -2    9.43    0.85
  -2   1  -2    9.03    0.85
   2  -1   2   10.87    0.63
  -3   1  -2    1.73    0.59
  -3   1  -2    2.68    0.66
   3  -1   2    1.24    0.43
   3  -1   2    1.31    0.45
  -4   1  -2   13.68    1.25
  -4   1  -2   13.45    1.31
   4  -1   2   12.98    0.98
   4  -1   2   14.77    0.76
   4  -1   2   14.62    1.01
  -5   1  -2   10.12    1.32
   5  -1   2    8.89    0.73
   5  -1   2    9.00    0.63
   5  -1   2    8.77    0.92
   5  -1   2   11.44    1.08
   5  -1   2    8.71    0.62
  -6   1  -2   10.69    1.49
   6  -1   2   10.20    1.15
   6  -1   2   10.01    0.75
   6  -1   2    7.93    0.78
   6  -1   2    7.97    0.97
  -7   1  -2    1.54    1.04
   7  -1   2    1.15    0.52
   7  -1   2    0.66    0.70
   7  -1   2    0.45    0.44
   7  -1   2    2.74    0.76
  -8   1  -2    5.04    1.47
   8  -1   2    5.37    1.05
   8  -1   2    6.00    0.83
   8  -1   2    5.01    0.82
   9  -1   2    0.13    0.76
   9  -1   2    0.43    0.61
   9  -1   2   -0.26    0.55
  10  -1   2    1.20    0.76
  10  -1   2    0.77    0.90
  10  -1   2   -0.04    0.64
  11  -1   2    1.72    0.89
  11  -1   2    0.05    0.79
  12   0  -2   -1.16    1.08
  12   0  -2   -0.18    0.90
  11   0  -2    1.35    1.17
  11   0  -2    0.71    0.86
  11   0  -2    0.42    0.87
  10   0  -2   18.76    1.74
  10   0  -2   23.80    2.16
  10   0  -2   20.54    1.73
   9   0  -2    1.02    0.66
   9   0  -2    0.71    0.91
   9   0  -2    0.72    0.69
   8   0  -2   -0.02    0.55
   8   0  -2   -0.17    0.74
   8   0  -2    0.07    0.54
  -8   0   2    0.02    0.88
   7   0  -2   -0.20    0.47
   7   0  -2    0.78    0.69
   7   0  -2    0.28    0.49
   7   0  -2   -0.07    0.51
  -7   0   2   -0.13    0.55
   6   0  -2   25.78    1.17
   6   0  -2   24.35    1.60
   6   0  -2   23.69    1.37
   6   0  -2   27.26    1.27
   6   0  -2   25.18    1.35
  -6   0   2   26.26    0.95
  -6   0   2   24.38    1.47
   5   0  -2    6.76    0.96
   5   0  -2    6.21    0.76
   5   0  -2    6.74    0.65
   5   0  -2    6.47    0.69
   5   0  -2    5.37    0.68
  -5   0   2    4.20    0.71
  -5   0   2    6.01    0.55
  -5   0   2    5.98    0.49
  -5   0   2    5.80    0.47
   4   0  -2   23.08    1.00
   4   0  -2   24.49    1.34
   4   0  -2   22.73    0.94
   4   0  -2   24.00    1.16
   4   0  -2   23.48    1.10
  -4   0   2   22.31    0.92
  -4   0   2   24.24    1.16
  -4   0   2   22.84    0.81
  -4   0   2   22.45    0.80
  -4   0   2   22.45    1.18
   3   0  -2   25.85    1.24
   3   0  -2   26.95    0.96
   3   0  -2   26.24    1.07
   3   0  -2   25.24    0.81
   3   0  -2   25.67    0.91
   3   0  -2   26.65    1.10
  -3   0   2   25.96    1.30
  -3   0   2   25.92    0.90
  -3   0   2   24.17    0.79
  -3   0   2   25.57    0.79
  -3   0   2   25.10    1.13
  -3   0   2   26.16    1.10
   2   0  -2   37.15    0.95
   2   0  -2   38.61    1.38
   2   0  -2   40.80    1.10
   2   0  -2   38.00    1.21
  -2   0   2   35.99    1.23
  -2   0   2   39.82    1.41
  -2   0   2   31.18    0.91
  -2   0   2   38.63    1.23
  -2   0   2   38.41    0.98
  -2   0   2   38.16    1.05
   1   0  -2   32.29    0.76
   1   0  -2   31.39    0.92
   1   0  -2   31.23    0.91
  -1   0   2   30.48    0.76
  -1   0   2   31.97    0.96
  -1   0   2   31.26    0.94
  -1   0   2   31.16    0.76
  -1   0   2   32.11    0.84
  -1   0   2   31.55    1.05
   0   0  -2  204.47    4.03
   0   0  -2  211.35    4.03
   0   0   2  208.00    4.06
  -1   0  -2   59.92    1.86
   1   0   2   54.63    1.74
  -2   0  -2   51.78    1.91
   2   0   2   51.57    1.77
   2   0   2   51.55    1.83
  -3   0  -2   27.50    1.55
  -3   0  -2   26.63    1.56
   3   0   2   28.04    1.39
  -4   0  -2   34.57    1.92
  -4   0  -2   34.00    1.95
   4   0   2   34.94    1.14
   4   0   2   35.07    1.30
   4   0   2   33.21    1.67
  -5   0  -2    3.06    0.90
   5   0   2    2.86    0.47
   5   0   2    2.88    0.57
   5   0   2    1.60    0.69
  -6   0  -2    1.71    0.98
   6   0   2    1.93    0.60
   6   0   2    1.54    0.73
   6   0   2    2.21    0.49
   6   0   2    2.49    0.44
  -7   0  -2   34.52    2.56
   7   0   2   34.95    1.55
   7   0   2   34.61    1.36
   7   0   2   36.34    2.07
   7   0   2   32.79    1.66
  -8   0  -2    2.75    1.25
   8   0   2    0.13    0.61
   8   0   2    1.63    0.60
   8   0   2    1.62    0.93
   8   0   2    1.20    0.60
   8   0   2    0.56    0.49
   9   0   2    3.40    1.13
   9   0   2    4.48    0.81
   9   0   2    5.56    0.95
  10   0   2    0.11    0.59
  10   0   2    0.79    0.98
  10   0   2    0.17    0.68
  11   0   2   11.31    1.80
  11   0   2    7.70    1.20
  11   0   2    8.95    1.27
  12   0   2    0.65    1.00
  12  -1  -2    0.25    0.92
  11  -1  -2    2.58    0.99
  11  -1  -2    5.19    1.40
  11  -1  -2    2.27    1.09
  10  -1  -2    0.49    0.80
  10  -1  -2   -0.11    0.71
  10  -1  -2   -0.88    0.86
   9  -1  -2    1.15    0.72
   9  -1  -2    0.33    0.81
   9  -1  -2    0.79    0.69
   8  -1  -2    0.80    0.65
   8  -1  -2    0.63    0.62
   8  -1  -2    0.37    0.78
   7  -1  -2    1.58    0.76
   7  -1  -2    3.33    0.70
   7  -1  -2    1.94    0.64
  -7   1   2    2.53    0.86
   6  -1  -2    0.44    0.60
   6  -1  -2    0.05    0.35
   6  -1  -2    0.06    0.45
   6  -1  -2    0.72    0.52
   6  -1  -2    1.06    0.47
  -6   1   2    0.31    0.53
  -6   1   2    1.26    0.37
  -6   1   2    0.42    0.26
   5  -1  -2   19.87    1.00
   5  -1  -2   19.55    1.23
   5  -1  -2   22.99    1.10
   5  -1  -2   22.40    1.16
   5  -1  -2   20.95    1.34
  -5   1   2   20.64    0.85
  -5   1   2   20.51    0.79
  -5   1   2   20.01    1.34
  -5   1   2   19.90    0.91
   4  -1  -2   75.84    2.48
   4  -1  -2   76.06    2.36
   4  -1  -2   77.16    2.06
   4  -1  -2   78.14    2.06
  -4   1   2   81.47    1.99
  -4   1   2   77.29    2.25
  -4   1   2   75.88    2.47
  -4   1   2   75.07    1.81
  -4   1   2   73.89    1.85
   3  -1  -2    9.67    0.63
   3  -1  -2    9.98    0.65
   3  -1  -2    9.11    0.79
   3  -1  -2    9.43    0.71
   3  -1  -2    9.68    0.82
  -3   1   2   10.66    0.92
  -3   1   2    9.69    0.72
  -3   1   2    9.35    0.61
  -3   1   2    9.41    0.51
  -3   1   2   10.20    0.84
   2  -1  -2    9.97    0.62
   2  -1  -2    8.87    0.70
   2  -1  -2   10.10    0.57
   2  -1  -2    9.29    0.70
   2  -1  -2    9.72    0.57
  -2   1   2   10.10    0.80
  -2   1   2   10.39    0.73
  -2   1   2    9.70    0.63
  -2   1   2    9.13    0.56
   1  -1  -2    1.07    0.27
   1  -1  -2    0.79    0.33
   1  -1  -2    0.86    0.20
   1  -1  -2    0.89    0.25
   1  -1  -2    0.31    0.17
  -1   1   2    0.88    0.37
  -1   1   2    0.59    0.21
  -1   1   2    0.64    0.32
  -1   1   2    1.09    0.26
  -1   1   2    0.82    0.27
  -1   1   2    0.89    0.25
   0  -1  -2   71.17    1.63
   0  -1  -2   71.46    1.55
   0   1   2   73.47    1.57
   0   1   2   73.15    1.45
   0   1   2   73.92    1.43
   0   1   2   73.34    1.68
  -2  -1  -2   -0.10    0.56
   2   1   2   -0.49    0.71
   2   1   2    0.08    0.17
  -3  -1  -2  105.41    3.29
  -3  -1  -2   94.94    3.38
   3   1   2  100.57    3.29
  -4  -1  -2    8.47    1.21
   4   1   2   10.06    1.26
   4   1   2    9.44    0.64
  -5  -1  -2    8.88    1.29
   5   1   2    6.93    0.66
   5   1   2    9.57    1.31
   5   1   2    6.82    0.67
  -6  -1  -2   78.98    3.47
   6   1   2   75.88    3.11
   6   1   2   77.06    2.31
   6   1   2   78.42    1.95
   6   1   2   76.34    2.30
  -7  -1  -2   21.58    2.28
   7   1   2   17.58    1.18
   7   1   2   19.88    1.78
   7   1   2   18.36    0.97
   7   1   2   17.71    1.17
  -8  -1  -2    0.45    0.97
   8   1   2   -0.85    0.47
   8   1   2   -0.47    0.77
   8   1   2   -0.77    0.40
   8   1   2   -0.46    0.53
   9   1   2    0.76    0.98
   9   1   2    1.36    0.72
   9   1   2    0.15    0.57
  10   1   2   14.45    1.95
  10   1   2   12.11    1.26
  10   1   2   13.45    1.31
  10   1   2   13.38    1.37
  11   1   2    0.71    0.82
  11   1   2    0.72    1.02
  12   1   2   -2.01    0.79
  12   1   2    0.91    1.22
  11  -2  -2    3.33    1.06
  10  -2  -2    4.49    0.98
  10  -2  -2    6.18    1.34
  10  -2  -2    5.98    1.14
   9  -2  -2    3.34    1.06
   9  -2  -2    4.09    0.92
   9  -2  -2    4.47    0.93
   8  -2  -2    5.40    0.93
   8  -2  -2    8.76    1.10
   8  -2  -2    7.86    1.26
   7  -2  -2    3.34    0.93
   7  -2  -2    1.75    0.67
   7  -2  -2    3.32    0.74
   6  -2  -2   -0.72    0.42
   6  -2  -2   -0.04    0.36
   6  -2  -2   -0.29    0.44
   6  -2  -2   -0.59    0.53
   6  -2  -2    0.32    0.51
  -6   2   2   -0.01    0.59
  -6   2   2   -0.50    0.29
  -6   2   2   -0.21    0.32
  -6   2   2   -0.27    0.24
   5  -2  -2   25.66    1.49
   5  -2  -2   28.46    1.35
   5  -2  -2   26.73    1.23
   5  -2  -2   27.88    1.48
   5  -2  -2   28.32    1.26
  -5   2   2   27.85    1.62
  -5   2   2   26.92    0.96
  -5   2   2   25.76    1.03
  -5   2   2   27.78    1.11
   4  -2  -2   42.67    1.70
   4  -2  -2   43.45    1.48
   4  -2  -2   41.60    1.77
   4  -2  -2   41.99    1.44
  -4   2   2   44.86    1.25
  -4   2   2   41.18    1.31
  -4   2   2   43.82    1.41
  -4   2   2   42.32    1.86
   3  -2  -2    0.00    0.45
   3  -2  -2    0.82    0.41
   3  -2  -2    0.57    0.33
   3  -2  -2    1.26    0.36
   3  -2  -2    0.76    0.36
  -3   2   2    0.99    0.33
  -3   2   2    0.76    0.54
  -3   2   2    1.64    0.40
  -3   2   2    0.76    0.36
  -3   2   2    0.66    0.26
   2  -2  -2   33.20    1.09
   2  -2  -2   31.31    1.33
   2  -2  -2   33.01    1.04
   2  -2  -2   33.05    1.13
  -2   2   2   33.38    1.26
  -2   2   2   33.56    1.46
  -2   2   2   30.90    1.06
  -2   2   2   33.09    1.14
   1  -2  -2   48.46    1.31
   1  -2  -2   47.37    1.27
   1  -2  -2   45.27    1.52
  -1   2   2   44.12    1.61
  -1   2   2   47.61    1.32
  -1   2   2   47.79    1.20
   0  -2  -2    0.94    0.24
   0  -2  -2    1.16    0.38
   0  -2  -2    1.52    0.23
   0  -2  -2    1.58    0.20
   0  -2  -2    1.16    0.24
   0   2   2    1.18    0.42
   0   2   2    1.14    0.26
   0   2   2    1.29    0.25
   0   2   2    1.00    0.27
   0   2   2    1.56    0.24
  -1  -2  -2   12.85    0.45
  -1  -2  -2   13.48    0.61
   1   2   2   12.67    0.73
   1   2   2   12.88    0.50
   2   2   2   12.58    1.48
   2   2   2   10.97    1.12
   2   2   2   10.55    0.44
  -3  -2  -2   42.91    2.10
   3   2   2   40.91    1.07
   3   2   2   39.40    2.20
  -4  -2  -2   24.94    1.83
   4   2   2   26.67    1.62
   4   2   2   21.61    1.81
   4   2   2   24.14    0.89
  -5  -2  -2   61.24    2.94
   5   2   2   65.93    2.95
   5   2   2   67.95    1.89
   5   2   2   71.64    2.74
   5   2   2   70.01    2.10
  -6  -2  -2   86.40    3.74
   6   2   2   84.56    2.39
   6   2   2   84.76    3.52
   6   2   2   87.54    2.60
  -7  -2  -2    4.05    1.26
   7   2   2    4.21    0.66
   7   2   2    4.60    0.78
   7   2   2    3.17    1.16
   7   2   2    3.41    0.55
  -8  -2  -2    6.00    1.56
   8   2   2    3.28    1.17
   8   2   2    3.38    0.73
   8   2   2    4.74    0.84
   8   2   2    4.56    0.69
   9   2   2   24.06    1.44
   9   2   2   26.86    1.67
   9   2   2   25.77    2.52
  10   2   2    1.71    0.70
  10   2   2    0.99    0.75
  10   2   2    1.71    1.11
  11   2   2    0.85    0.83
  11   2   2    1.18    1.25
  12   2   2    1.83    0.99
  12   2   2    0.83    1.20
  11  -3  -2   -0.34    0.85
  10  -3  -2   14.31    1.71
  10  -3  -2   10.40    1.38
   9  -3  -2    3.33    0.88
   9  -3  -2    2.81    1.00
   9  -3  -2    2.83    0.91
   8  -3  -2    3.33    0.99
   8  -3  -2    4.32    0.90
   8  -3  -2    5.33    0.91
   7  -3  -2    0.77    0.61
   7  -3  -2    1.29    0.65
   7  -3  -2    0.52    0.73
   6  -3  -2    2.50    0.64
   6  -3  -2    2.81    0.65
   6  -3  -2    5.06    0.91
  -6   3   2    3.94    0.56
  -6   3   2    4.02    0.57
  -6   3   2    2.87    0.41
  -6   3   2    3.22    0.91
   5  -3  -2   43.99    1.73
   5  -3  -2   40.11    1.60
   5  -3  -2   41.04    1.60
   5  -3  -2   36.83    1.93
   5  -3  -2   43.15    1.86
  -5   3   2   40.49    2.10
  -5   3   2   39.24    1.27
  -5   3   2   41.80    1.42
  -5   3   2   42.93    1.48
   4  -3  -2   -0.87    0.37
   4  -3  -2    0.14    0.31
   4  -3  -2   -0.14    0.32
   4  -3  -2    0.27    0.37
  -4   3   2    0.45    0.35
  -4   3   2   -0.10    0.49
  -4   3   2    0.30    0.33
  -4   3   2    0.11    0.28
   3  -3  -2    2.80    0.47
   3  -3  -2    3.16    0.50
   3  -3  -2    2.66    0.50
   3  -3  -2    3.38    0.69
  -3   3   2    2.98    0.71
  -3   3   2    2.67    0.45
  -3   3   2    2.33    0.45
  -3   3   2    2.43    0.46
   2  -3  -2    8.52    0.92
   2  -3  -2    8.56    0.67
   2  -3  -2    7.64    0.69
   2  -3  -2    7.12    0.61
  -2   3   2    8.21    0.96
  -2   3   2    6.45    0.61
  -2   3   2    8.01    0.65
  -2   3   2    6.93    0.69
  -2   3   2    7.14    0.55
   1  -3  -2    5.67    0.53
   1  -3  -2    5.05    0.71
   1  -3  -2    4.88    0.53
  -1   3   2    4.81    0.49
  -1   3   2    5.01    0.77
  -1   3   2    5.09    0.50
  -1   3   2    5.31    0.48
   0  -3  -2   12.23    0.89
   0  -3  -2   12.14    0.54
   0  -3  -2   13.29    0.62
   0  -3  -2   11.88    0.61
   0   3   2   13.12    0.64
   0   3   2   12.34    1.00
   0   3   2   11.83    0.62
   0   3   2   13.10    0.60
  -1  -3  -2   43.51    1.16
  -1  -3  -2   43.88    0.98
  -1  -3  -2   42.98    1.03
  -1  -3  -2   42.78    0.97
  -1  -3  -2   44.45    1.44
   1   3   2   42.22    1.19
   1   3   2   42.03    1.58
   1   3   2   44.80    1.11
  -2  -3  -2   43.68    1.11
  -2  -3  -2   44.09    1.33
   2   3   2   42.61    1.17
   2   3   2   41.05    1.52
   2   3   2   43.31    0.99
   2   3   2   43.73    1.04
   3   3   2   10.98    0.58
   3   3   2   11.17    1.50
  -4  -3  -2    1.34    0.86
   4   3   2    1.94    1.00
   4   3   2    1.41    0.55
   4   3   2    1.34    0.34
   4   3   2    0.81    0.68
  -5  -3  -2  110.73    4.22
   5   3   2  118.09    3.90
   5   3   2  115.47    4.30
   5   3   2  115.96    2.79
   5   3   2  110.96    3.16
  -6  -3  -2   11.54    1.69
   6   3   2   12.44    0.74
   6   3   2   13.31    1.48
   6   3   2   11.83    1.07
   6   3   2   12.89    1.75
   6   3   2   12.69    0.82
  -7  -3  -2    5.56    1.45
   7   3   2    6.75    0.92
   7   3   2    6.86    1.47
   7   3   2    6.11    0.67
   7   3   2    4.07    0.65
  -8  -3  -2   23.26    2.71
   8   3   2   23.08    2.42
   8   3   2   18.37    1.15
   8   3   2   19.40    1.24
   8   3   2   20.17    1.49
   9   3   2   25.74    2.71
   9   3   2   23.33    1.40
   9   3   2   25.44    1.69
  10   3   2   12.27    2.05
  10   3   2    8.42    1.24
  10   3   2    9.41    1.14
  11   3   2    2.30    1.37
  11   3   2    2.22    1.01
  12   3   2    6.24    1.31
  12   3   2    8.16    1.88
  11  -4  -2    2.79    1.09
  10  -4  -2    4.31    1.11
   9  -4  -2    7.69    1.22
   9  -4  -2    6.21    1.12
   8  -4  -2    0.96    0.68
   8  -4  -2    1.86    0.77
   7  -4  -2   20.76    1.44
   7  -4  -2   24.16    1.57
   6  -4  -2    0.90    0.57
   6  -4  -2    0.46    0.52
  -6   4   2    1.18    0.48
  -6   4   2    0.89    0.36
  -6   4   2    0.97    0.44
   5  -4  -2    7.27    0.84
   5  -4  -2   10.64    1.02
   5  -4  -2   10.02    0.99
   5  -4  -2   11.79    1.30
  -5   4   2    8.99    1.32
  -5   4   2    9.80    0.86
  -5   4   2   10.07    0.87
  -5   4   2    9.17    0.68
   4  -4  -2    1.08    0.47
   4  -4  -2    1.70    0.49
   4  -4  -2    1.80    0.70
   4  -4  -2    1.39    0.48
  -4   4   2    1.62    0.47
  -4   4   2    2.62    0.86
  -4   4   2    1.37    0.47
   3  -4  -2   23.92    1.13
   3  -4  -2   22.02    1.06
   3  -4  -2   21.23    1.11
   3  -4  -2   19.17    1.41
  -3   4   2   22.50    1.09
  -3   4   2   21.87    1.03
  -3   4   2   21.87    1.58
   2  -4  -2   94.89    2.47
   2  -4  -2   95.40    2.99
   2  -4  -2   93.69    2.49
   2  -4  -2   94.19    2.33
  -2   4   2   91.73    2.43
  -2   4   2   90.46    3.11
  -2   4   2   94.61    2.37
  -2   4   2   90.40    2.49
   1  -4  -2    1.82    0.60
   1  -4  -2    1.13    0.33
   1  -4  -2    1.11    0.37
   1  -4  -2    1.17    0.39
  -1   4   2    1.29    0.72
  -1   4   2    0.96    0.36
  -1   4   2    1.52    0.38
  -1   4   2    1.63    0.40
   0  -4  -2   20.71    0.90
   0  -4  -2   21.16    0.89
   0  -4  -2   21.67    0.80
   0  -4  -2   21.77    1.25
   0   4   2   20.70    0.89
   0   4   2   23.74    1.45
   0   4   2   19.13    0.88
  -1  -4  -2   95.04    2.05
  -1  -4  -2   95.07    2.31
  -1  -4  -2   95.09    2.70
  -1  -4  -2   99.29    2.19
   1   4   2   95.42    2.93
   1   4   2   97.00    2.36
   1   4   2  100.27    2.27
  -2  -4  -2   30.40    1.29
  -2  -4  -2   30.19    0.98
   2   4   2   30.34    1.03
   2   4   2   28.96    0.97
   2   4   2   27.40    2.19
  -3  -4  -2   16.04    0.70
   3   4   2   15.74    1.88
   3   4   2   16.03    0.76
   3   4   2   16.48    1.56
   3   4   2   16.69    0.72
   4   4   2   35.88    1.18
   4   4   2   33.97    1.99
   4   4   2   32.84    1.07
  -5  -4  -2   51.69    2.86
   5   4   2   54.07    1.53
   5   4   2   54.64    2.18
   5   4   2   55.57    2.61
   5   4   2   51.61    1.63
   5   4   2   54.90    3.04
  -6  -4  -2    3.98    1.25
   6   4   2    3.56    0.54
   6   4   2    5.02    0.58
   6   4   2    2.20    1.17
   6   4   2    4.56    1.03
   6   4   2    3.55    0.77
  -7  -4  -2   15.20    2.12
   7   4   2   11.56    1.24
   7   4   2   12.82    0.94
   7   4   2   13.90    2.04
   7   4   2   14.30    0.98
  -8  -4  -2   27.25    3.00
   8   4   2   25.63    1.37
   8   4   2   23.09    2.60
   8   4   2   27.24    1.75
   8   4   2   25.12    1.34
   9   4   2    3.91    0.97
   9   4   2    4.01    0.80
   9   4   2    3.05    1.36
  10   4   2    8.33    1.92
  10   4   2    7.91    1.25
  10   4   2    7.56    1.04
  11   4   2   -0.22    1.20
  11   4   2    0.71    0.86
  12   4   2    2.44    1.05
  12   4   2    5.05    1.76
  10  -5  -2    3.39    1.06
   9  -5  -2    1.67    0.92
   8  -5  -2   12.21    1.37
   8  -5  -2   11.68    1.40
   7  -5  -2    6.61    1.05
   7  -5  -2    6.78    1.01
   6  -5  -2    0.15    0.53
   6  -5  -2   -0.67    0.52
  -6   5   2    0.80    0.39
  -6   5   2    0.84    0.52
  -6   5   2    0.88    0.46
   5  -5  -2   31.27    1.52
   5  -5  -2   31.15    1.59
  -5   5   2   32.14    1.39
  -5   5   2   27.32    1.14
  -5   5   2   30.28    1.39
   4  -5  -2    2.21    0.57
   4  -5  -2    4.35    0.96
   4  -5  -2    1.62    0.58
   4  -5  -2    3.38    0.65
  -4   5   2    3.62    0.64
  -4   5   2    3.64    0.63
  -4   5   2    3.08    1.00
   3  -5  -2   23.27    1.22
   3  -5  -2   20.47    1.58
   3  -5  -2   23.99    1.26
   3  -5  -2   24.90    1.16
  -3   5   2   23.06    1.18
  -3   5   2   25.43    1.83
  -3   5   2   23.58    1.18
   2  -5  -2    5.89    0.97
   2  -5  -2    5.49    0.67
   2  -5  -2    5.55    0.67
  -2   5   2    6.55    1.13
  -2   5   2    4.96    0.64
  -2   5   2    4.80    0.63
  -2   5   2    5.92    0.70
   1  -5  -2   24.46    1.53
   1  -5  -2   25.15    1.16
   1  -5  -2   25.51    1.04
   1  -5  -2   26.80    1.14
  -1   5   2   31.83    1.87
  -1   5   2   24.91    1.11
  -1   5   2   27.05    1.16
  -1   5   2   25.09    1.15
   0  -5  -2   16.31    0.87
   0  -5  -2   16.20    0.77
   0  -5  -2   15.46    0.88
   0  -5  -2   17.24    1.25
   0   5   2   16.36    0.91
   0   5   2   16.31    0.91
   0   5   2   15.17    1.46
   0   5   2   16.36    0.88
  -1  -5  -2   24.43    1.01
  -1  -5  -2   23.76    0.83
  -1  -5  -2   25.52    0.99
  -1  -5  -2   26.04    1.57
   1   5   2   25.44    1.06
   1   5   2   23.76    1.01
  -2  -5  -2   12.20    0.61
  -2  -5  -2   12.25    0.70
  -2  -5  -2   11.71    0.52
   2   5   2   12.09    1.79
   2   5   2   11.82    0.72
   2   5   2   11.72    0.76
  -3  -5  -2    3.31    0.43
   3   5   2    3.43    0.47
   3   5   2    2.36    0.46
   3   5   2    1.86    1.16
   3   5   2    2.59    0.93
  -4  -5  -2   22.20    0.90
   4   5   2   22.83    1.00
   4   5   2   22.19    1.80
   4   5   2   24.49    2.45
   4   5   2   23.56    1.02
   5   5   2    0.40    0.35
   5   5   2   -0.28    0.67
   5   5   2    0.90    0.69
   5   5   2    0.41    0.36
   5   5   2   -0.03    0.36
   6   5   2   19.64    1.76
   6   5   2   18.13    1.05
   6   5   2   21.99    1.60
   6   5   2   21.52    1.09
  -7  -5  -2   40.24    3.03
   7   5   2   40.29    1.60
   7   5   2   41.78    2.19
   7   5   2   39.18    1.60
   7   5   2   38.32    2.96
   7   5   2   38.12    2.42
  -8  -5  -2   57.81    3.79
   8   5   2   63.20    2.14
   8   5   2   58.13    2.61
   8   5   2   49.20    3.45
   9   5   2   20.49    1.75
   9   5   2   19.78    1.40
   9   5   2   18.78    2.55
  10   5   2   17.93    1.76
  10   5   2   20.23    1.55
  10   5   2   20.99    2.74
  11   5   2    1.49    0.89
  11   5   2    0.70    1.34
  12   5   2    2.44    1.66
  12   5   2    0.63    0.98
   9  -6  -2    3.42    1.09
   8  -6  -2    8.77    1.27
   7  -6  -2    1.33    0.74
   6  -6  -2    2.38    0.77
   6  -6  -2    2.00    0.75
  -6   6   2    2.63    0.50
  -6   6   2    2.52    0.63
  -6   6   2    3.41    0.65
   5  -6  -2   13.54    1.30
   5  -6  -2   11.07    1.09
  -5   6   2   10.89    0.83
  -5   6   2   11.05    1.01
  -5   6   2   11.38    1.02
   4  -6  -2    0.49    0.52
   4  -6  -2   -0.14    0.54
   4  -6  -2   -0.05    0.52
  -4   6   2    0.75    0.50
  -4   6   2    0.73    0.54
   3  -6  -2    0.00    0.32
   3  -6  -2    0.60    0.51
   3  -6  -2    0.66    0.72
   3  -6  -2   -0.14    0.35
  -3   6   2    0.62    0.47
  -3   6   2    2.81    1.00
  -3   6   2    0.66    0.48
   2  -6  -2   55.24    2.55
   2  -6  -2   58.32    1.99
   2  -6  -2   58.06    2.01
  -2   6   2   58.23    1.98
  -2   6   2   55.14    1.95
  -2   6   2   58.56    2.79
   1  -6  -2    1.52    0.47
   1  -6  -2    1.80    0.51
   1  -6  -2    2.08    0.77
   1  -6  -2    2.95    0.52
  -1   6   2    2.14    0.52
  -1   6   2    2.36    0.49
  -1   6   2    2.74    0.91
   0  -6  -2    1.63    0.45
   0  -6  -2    1.28    0.47
   0  -6  -2    0.45    0.35
   0   6   2    0.59    0.40
   0   6   2    0.69    0.46
   0   6   2    1.32    0.42
  -1  -6  -2   28.29    0.98
  -1  -6  -2   27.33    1.15
  -1  -6  -2   25.75    1.15
   1   6   2   27.77    1.18
   1   6   2   28.71    1.26
  -2  -6  -2    6.12    0.46
  -2  -6  -2    6.57    0.60
  -2  -6  -2    7.31    0.68
   2   6   2    5.59    0.61
   2   6   2    7.79    1.67
   2   6   2    6.96    0.72
  -3  -6  -2    0.24    0.31
   3   6   2    1.08    1.16
   3   6   2   -0.21    0.38
   3   6   2   -0.06    0.29
  -4  -6  -2   -0.43    0.28
   4   6   2   -0.03    0.32
   4   6   2   -0.23    0.74
   4   6   2    0.57    0.43
   4   6   2   -0.55    1.02
   5   6   2    5.70    1.19
   5   6   2    4.42    1.43
   5   6   2    5.90    0.74
   5   6   2    6.44    0.69
   5   6   2    4.22    0.98
   6   6   2   38.19    2.23
   6   6   2   36.73    1.54
   6   6   2   34.87    2.34
   6   6   2   35.80    1.48
   6   6   2   27.60    2.58
   7   6   2   14.26    1.78
   7   6   2   10.93    1.46
   7   6   2   13.72    1.15
   7   6   2   13.43    2.17
   7   6   2   13.91    1.03
   8   6   2    1.42    1.38
   8   6   2    1.94    0.72
   8   6   2   -0.16    0.86
   9   6   2    5.49    1.87
   9   6   2    7.62    1.31
   9   6   2    4.78    0.88
  10   6   2   17.14    2.65
  10   6   2   16.27    1.81
  10   6   2   18.85    1.64
  11   6   2    7.19    1.30
  11   6   2   12.35    2.46
  12   6   2    4.25    1.93
  12   6   2    0.77    1.06
   9  -7  -2    2.07    0.99
   8  -7  -2    2.98    0.98
   7  -7  -2    5.81    1.10
   6  -7  -2    6.34    1.01
  -6   7   2    3.16    0.65
  -6   7   2    5.26    0.63
  -6   7   2    5.47    0.81
   5  -7  -2    1.63    0.66
   5  -7  -2    1.02    0.68
  -5   7   2    1.34    0.46
  -5   7   2    1.17    0.60
  -5   7   2    1.96    0.67
   4  -7  -2    9.65    1.02
   4  -7  -2   11.40    1.21
  -4   7   2   10.37    1.08
  -4   7   2    8.61    0.95
   3  -7  -2   25.03    1.32
   3  -7  -2   23.85    1.51
  -3   7   2   24.53    1.45
  -3   7   2   25.62    1.40
   2  -7  -2   77.18    2.47
   2  -7  -2   74.06    2.29
   2  -7  -2   75.65    2.48
  -2   7   2   74.38    2.41
  -2   7   2   68.24    2.38
   1  -7  -2    1.93    0.53
   1  -7  -2    2.44    0.60
   1  -7  -2    3.85    0.66
  -1   7   2    3.18    0.62
  -1   7   2    2.42    0.57
   0  -7  -2    0.06    0.38
   0  -7  -2    0.25    0.44
   0  -7  -2    0.01    0.35
   0   7   2    0.51    0.45
   0   7   2    0.21    0.39
   0   7   2   -0.31    0.33
  -1  -7  -2   48.24    1.47
  -1  -7  -2   49.19    1.75
  -1  -7  -2   51.56    1.72
   1   7   2   48.82    1.76
   1   7   2   48.11    1.81
  -2  -7  -2    0.61    0.30
  -2  -7  -2    0.08    0.37
  -2  -7  -2    0.48    0.37
   2   7   2    0.32    0.45
   2   7   2    0.26    0.35
   2   7   2    1.80    1.27
  -3  -7  -2    3.91    0.56
  -3  -7  -2    3.67    0.38
   3   7   2    5.22    0.75
   3   7   2    4.49    1.50
   3   7   2    4.00    0.60
  -4  -7  -2   20.64    1.02
   4   7   2   19.43    1.19
   4   7   2   18.68    2.52
   4   7   2   16.70    1.03
   4   7   2   20.33    2.08
   5   7   2    2.08    1.01
   5   7   2    0.49    0.42
   5   7   2    0.92    0.93
   5   7   2    1.43    1.29
   5   7   2    0.09    0.52
   6   7   2   25.68    2.97
   6   7   2   24.95    1.43
   6   7   2   26.57    2.16
   6   7   2   25.99    1.45
   6   7   2   25.99    2.18
   7   7   2    1.30    1.15
   7   7   2    1.38    0.69
   7   7   2    1.64    0.96
   8   7   2    5.01    1.69
   8   7   2    3.70    1.19
   8   7   2    4.82    0.96
   9   7   2    0.92    0.97
   9   7   2    1.67    0.82
   9   7   2    0.60    1.40
  10   7   2    0.59    0.81
  10   7   2   -0.34    0.95
  10   7   2   -1.39    1.35
  11   7   2   12.00    1.77
  11   7   2   11.65    1.54
  11   7   2    9.15    2.34
  12   7   2    2.30    1.92
  12   7   2    2.95    1.32
   8  -8  -2    0.14    0.82
   7  -8  -2    1.69    0.89
   6  -8  -2    4.88    1.03
  -6   8   2    3.79    0.60
  -6   8   2    2.95    0.66
  -6   8   2    2.59    0.76
   5  -8  -2    3.77    0.85
  -5   8   2    6.30    0.95
  -5   8   2    5.19    0.68
   4  -8  -2    1.28    0.63
  -4   8   2    2.32    0.80
   3  -8  -2   74.77    2.74
   3  -8  -2   76.77    2.50
  -3   8   2   75.24    2.65
   2  -8  -2   16.74    1.20
   2  -8  -2   18.87    1.40
   2  -8  -2   18.07    1.30
  -2   8   2   17.94    1.35
   1  -8  -2    3.04    0.69
   1  -8  -2    1.52    0.67
   1  -8  -2    2.58    0.58
  -1   8   2    2.46    0.73
   0  -8  -2   12.89    1.04
   0  -8  -2    9.49    0.85
   0  -8  -2   10.78    1.08
   0   8   2    9.85    1.07
  -1  -8  -2    2.02    0.46
  -1  -8  -2    0.53    0.50
  -1  -8  -2    0.67    0.51
   1   8   2    0.91    1.44
   1   8   2    1.69    0.54
   1   8   2    1.25    0.63
  -2  -8  -2   23.11    0.98
  -2  -8  -2   22.89    1.18
  -2  -8  -2   24.22    1.25
   2   8   2   28.38    3.08
   2   8   2   24.10    1.29
   2   8   2   23.60    1.40
  -3  -8  -2    3.81    0.54
  -3  -8  -2    5.21    0.69
  -3  -8  -2    4.72    0.47
   3   8   2    4.86    1.69
   3   8   2    4.48    0.79
   3   8   2    4.32    0.69
   4   8   2    1.67    1.03
   4   8   2    2.78    0.73
   4   8   2    1.93    1.56
   5   8   2    0.96    0.63
   5   8   2    1.96    1.10
   5   8   2    1.81    1.44
   5   8   2    0.54    0.97
   6   8   2   -1.84    0.73
   6   8   2   -0.19    0.95
   6   8   2    0.14    0.61
   6   8   2    0.38    1.33
   7   8   2   13.19    1.84
   7   8   2   13.17    1.30
   7   8   2   10.97    2.25
   8   8   2    0.40    0.76
   8   8   2    0.21    1.00
   8   8   2    1.34    1.38
   9   8   2    2.63    1.76
   9   8   2    1.38    1.14
   9   8   2    1.49    0.89
  10   8   2    3.08    1.74
  10   8   2    1.07    0.87
  10   8   2    3.31    1.27
  11   8   2   -0.26    0.91
  11   8   2    1.01    1.13
  11   8   2    0.11    1.71
   7  -9  -2    3.14    1.03
   6  -9  -2    0.43    0.76
  -6   9   2    0.82    0.48
   5  -9  -2    0.39    0.66
  -5   9   2    1.12    0.71
  -5   9   2   -0.70    0.46
   4  -9  -2   24.03    1.60
  -4   9   2   25.86    1.71
   3  -9  -2   10.35    1.16
  -3   9   2   10.54    1.23
   2  -9  -2    1.28    0.62
   2  -9  -2   -0.02    0.66
  -2   9   2   -0.02    0.66
   1  -9  -2   22.34    1.31
   1  -9  -2   20.62    1.49
  -1   9   2   22.06    1.57
   0  -9  -2    4.43    0.85
   0  -9  -2    4.82    0.71
   0   9   2    3.00    0.76
  -1  -9  -2    0.29    0.44
  -1  -9  -2    0.34    0.59
   1   9   2   -0.40    1.34
   1   9   2    0.90    0.65
  -2  -9  -2   13.33    1.08
  -2  -9  -2   15.91    0.92
   2   9   2   14.93    1.37
   2   9   2   18.18    2.66
  -3  -9  -2    9.41    0.83
  -3  -9  -2    8.54    0.65
   3   9   2    6.63    1.91
   3   9   2    8.16    1.08
   4   9   2    0.88    0.70
   4   9   2   -0.52    1.36
   4   9   2    1.20    1.03
   5   9   2    1.44    1.10
   5   9   2    0.88    1.05
   5   9   2    1.92    0.75
   5   9   2    1.28    1.51
   6   9   2    5.60    1.03
   6   9   2    1.46    1.17
   6   9   2    4.15    1.76
   7   9   2    8.95    2.21
   7   9   2   16.51    1.56
   7   9   2   14.94    2.05
   8   9   2   -0.62    1.35
   8   9   2    0.54    0.83
   8   9   2   -0.05    1.08
   9   9   2   -0.51    1.36
   9   9   2    0.38    0.86
   9   9   2    1.30    1.21
  10   9   2    0.14    0.91
  10   9   2    0.39    1.11
  10   9   2   -0.95    1.46
  11   9   2    5.52    2.24
  11   9   2    7.79    1.76
  11   9   2    7.72    1.46
   6 -10  -2   -0.45    0.79
   5 -10  -2    8.32    1.22
  -5  10   2    8.95    0.88
  -5  10   2    6.90    1.14
   4 -10  -2    4.89    1.01
  -4  10   2    4.93    1.03
   3 -10  -2    0.26    0.70
  -3  10   2    2.13    0.89
   2 -10  -2   16.94    1.35
   2 -10  -2   17.09    1.56
  -2  10   2   14.14    1.48
   1 -10  -2   34.60    1.68
   1 -10  -2   36.12    1.95
  -1  10   2   35.37    2.05
   0 -10  -2    1.08    0.61
   0 -10  -2    1.87    0.78
   0  10   2    2.46    0.85
   0  10   2    0.33    1.51
  -1 -10  -2    4.51    0.71
  -1 -10  -2    5.22    0.90
   1  10   2    4.76    0.99
   1  10   2    3.78    1.74
  -2 -10  -2   38.97    1.47
  -2 -10  -2   38.46    1.74
   2  10   2   38.64    3.56
   2  10   2   40.33    2.12
  -3 -10  -2    8.42    0.68
  -3 -10  -2    7.10    0.82
   3  10   2    4.87    1.01
   3  10   2    5.61    1.90
   4  10   2    0.76    0.78
   4  10   2    4.02    1.36
   4  10   2    2.04    1.74
   5  10   2   11.79    2.40
   5  10   2    7.79    1.21
   5  10   2    7.81    1.72
   6  10   2    9.63    2.32
   6  10   2    9.53    1.35
   6  10   2    7.17    1.74
   7  10   2   -0.77    1.43
   7  10   2    0.87    1.24
   7  10   2   -0.42    0.83
   8  10   2    0.51    1.34
   8  10   2    2.73    1.86
   8  10   2    0.08    0.94
   9  10   2    8.51    1.90
   9  10   2   11.94    2.72
   9  10   2   12.91    1.67
  10  10   2   -1.92    1.12
  10  10   2   -2.17    0.88
  10  10   2    0.71    1.76
  11  10   2   -0.12    1.36
  11  10   2    0.19    1.15
   5 -11  -2    1.18    0.91
  -5  11   2    1.27    0.55
   4 -11  -2    0.72    0.83
  -4  11   2    0.04    0.83
   3 -11  -2    0.08    0.73
  -3  11   2    1.31    0.94
   2 -11  -2   13.19    1.30
  -2  11   2   14.46    1.57
   1 -11  -2   11.75    1.15
   1 -11  -2   13.23    1.46
  -1  11   2   11.61    1.48
   0 -11  -2   -0.34    0.51
   0 -11  -2    0.23    0.75
   0  11   2    0.79    0.86
   0  11   2   -1.22    1.58
  -1 -11  -2    9.93    1.20
  -1 -11  -2   11.01    1.03
   1  11   2   10.47    1.34
   1  11   2   11.44    2.48
  -2 -11  -2    9.96    0.90
  -2 -11  -2    9.45    1.09
   2  11   2    8.34    1.34
   2  11   2   11.78    2.41
  -3 -11  -2    0.80    0.60
  -3 -11  -2    1.06    0.45
   3  11   2    2.30    1.75
   3  11   2   -0.21    0.77
   4  11   2    1.12    0.90
   4  11   2    1.21    1.54
   5  11   2   13.67    1.60
   5  11   2   12.84    2.62
   5  11   2   11.79    2.21
   6  11   2   -0.96    1.24
   6  11   2   -0.51    1.42
   6  11   2   -0.69    0.87
   7  11   2    3.49    1.16
   7  11   2    5.64    2.03
   7  11   2    3.40    1.58
   8  11   2   16.64    1.90
   8  11   2   15.49    2.48
   8  11   2   13.14    2.77
   9  11   2   15.31    3.06
   9  11   2   17.26    1.95
   9  11   2   16.37    2.45
  10  11   2    0.70    1.46
  10  11   2    0.36    1.11
   3 -12  -2    0.43    0.80
  -3  12   2    0.42    0.96
   2 -12  -2    0.34    0.77
  -2  12   2    2.62    1.08
   1 -12  -2    0.30    0.70
   1 -12  -2    1.41    0.93
  -1  12   2   -0.52    0.84
   0 -12  -2   -0.09    0.60
   0 -12  -2    1.63    0.89
   0  12   2   -0.39    0.92
  -1 -12  -2   13.74    1.18
  -1 -12  -2   12.01    1.39
   1  12   2   12.59    1.63
  -2 -12  -2    0.10    0.55
  -2 -12  -2   -0.32    0.72
   2  12   2   -0.23    0.87
   2  12   2   -0.66    1.59
  -3 -12  -2    0.86    0.66
   3  12   2    3.29    1.84
   3  12   2    0.12    0.89
   4  12   2    2.88    1.85
   4  12   2    1.68    1.05
   5  12   2   12.53    2.72
   5  12   2   10.12    1.57
   6  12   2   -0.95    1.58
   6  12   2    2.56    1.22
   7  12   2    6.90    2.53
   7  12   2    6.89    1.47
   8  12   2   15.69    1.93
   8  12   2   13.74    2.91
   9  12   2    1.26    1.27
   2 -13  -2    0.35    0.85
  -2  13   2   -0.33    1.01
   1 -13  -2   -0.06    0.69
   1 -13  -2    1.48    1.09
  -1  13   2   -0.13    1.01
   0 -13  -2   10.53    1.47
   0 -13  -2   10.05    1.18
   0  13   2   12.46    1.68
  -1 -13  -2    1.90    0.74
  -1 -13  -2    2.39    1.07
   1  13   2    0.02    1.01
  -2 -13  -2   -0.82    0.75
  -2 -13  -2    0.20    0.67
   2  13   2   -0.34    0.97
  -3 -13  -2    2.70    0.80
   3  13   2    3.21    1.26
   4  13   2   14.64    1.90
   4  13   2   14.70    2.81
   5  13   2    1.42    1.91
   5  13   2   -0.56    1.05
   6  13   2    7.39    1.54
   6  13   2    9.08    2.56
   7  13   2    9.86    1.76
   7  13   2   10.67    2.70
  -2 -14  -2    0.47    0.84
   2  14   2   -0.02    1.13
   3  14   2    4.01    1.38
   4  14   2   -0.08    1.11
   5  14   2   -0.07    1.86
   5  14   2    2.07    1.40
   3  14  -3    1.47    1.18
   7  13  -3    1.11    1.28
   7  13  -3   -1.18    1.30
   6  13  -3    0.62    1.02
  -6 -13   3   -0.10    0.73
   5  13  -3    5.14    1.43
  -5 -13   3    4.74    1.07
  -5 -13   3    3.72    0.80
   4  13  -3   -0.35    0.91
  -4 -13   3    1.67    0.74
  -4 -13   3    2.11    1.01
   3  13  -3    7.90    1.47
  -3 -13   3    9.52    1.44
  -3 -13   3    7.84    1.08
   2  13  -3    1.48    1.02
  -2 -13   3    1.62    0.82
   1  13  -3    0.15    0.90
  -1 -13   3    0.66    0.79
   0  13  -3   -0.18    0.90
   0 -13   3    1.46    0.83
   1 -13   3    3.05    1.00
   9  12  -3   -0.47    1.12
   8  12  -3   -0.51    1.41
   8  12  -3    0.39    1.13
   7  12  -3    0.85    1.53
   7  12  -3    2.87    1.22
   6  12  -3    7.97    1.95
   6  12  -3    8.30    1.51
  -6 -12   3    8.43    1.15
  -6 -12   3    9.26    0.96
   5  12  -3    0.47    1.30
   5  12  -3    1.11    1.01
  -5 -12   3    0.82    0.57
  -5 -12   3    1.51    0.86
   4  12  -3    6.46    1.32
  -4 -12   3    4.16    1.05
  -4 -12   3    4.66    0.83
   3  12  -3    4.37    1.16
  -3 -12   3    4.57    1.13
  -3 -12   3    9.04    1.07
   2  12  -3    0.63    0.91
  -2 -12   3   -0.01    0.67
  -2 -12   3    0.07    0.90
   1  12  -3    0.32    0.82
  -1 -12   3   -0.56    0.68
   0  12  -3   -0.08    0.81
   0 -12   3    1.13    0.77
  -1  12  -3    2.72    0.91
   1 -12   3    2.13    0.89
   2 -12   3    0.36    0.83
   3 -12   3    1.46    0.96
  10  11  -3    8.41    1.69
   9  11  -3    0.77    1.14
   9  11  -3   -0.22    1.35
   8  11  -3    3.08    1.68
   8  11  -3    1.64    1.21
   7  11  -3    3.79    1.20
   7  11  -3    5.43    1.75
   6  11  -3    1.44    1.33
   6  11  -3    0.60    0.93
  -6 -11   3    0.46    0.48
  -6 -11   3    1.71    0.81
   5  11  -3    3.41    1.44
   5  11  -3    5.80    1.23
  -5 -11   3    3.02    0.66
  -5 -11   3    4.04    0.95
   4  11  -3   -0.61    0.98
   4  11  -3    0.11    0.77
  -4 -11   3    0.30    0.75
  -4 -11   3    0.83    0.59
   3  11  -3    7.82    1.27
   3  11  -3    9.45    1.61
  -3 -11   3    8.70    1.23
  -3 -11   3    8.45    0.98
   2  11  -3    0.87    0.82
  -2 -11   3   -0.63    0.75
  -2 -11   3    0.23    0.62
   1  11  -3    1.29    0.90
  -1 -11   3    0.65    0.64
   0  11  -3    9.49    1.24
   0 -11   3   10.03    1.13
  -1  11  -3    1.38    0.84
   1 -11   3    1.54    0.75
  -2  11  -3    2.09    0.78
   2 -11   3    1.88    0.84
   3 -11   3    3.43    1.00
   4 -11   3    7.23    1.29
   5 -11   3    1.54    1.04
  10  10  -3    4.48    1.79
  10  10  -3    5.13    1.43
   9  10  -3    5.35    1.34
   9  10  -3    8.66    2.05
   8  10  -3    2.94    1.55
   8  10  -3    3.26    1.22
   7  10  -3   -0.07    0.84
   7  10  -3    0.45    1.12
  -7 -10   3    0.42    0.60
   6  10  -3   20.97    1.88
   6  10  -3   15.50    2.18
  -6 -10   3   18.22    1.38
  -6 -10   3   17.33    1.04
   5  10  -3    6.29    1.61
   5  10  -3    4.76    1.02
  -5 -10   3    6.87    0.80
  -5 -10   3    6.20    0.97
   4  10  -3    0.44    1.14
   4  10  -3    2.09    0.85
  -4 -10   3    2.91    0.81
  -4 -10   3    2.57    0.59
   3  10  -3   -0.11    0.93
   3  10  -3   -0.97    0.63
  -3 -10   3   -0.73    0.46
  -3 -10   3   -0.18    0.67
   2  10  -3    2.30    1.05
   2  10  -3    0.90    0.74
  -2 -10   3    1.80    0.61
  -2 -10   3    0.51    0.71
   1  10  -3    0.98    0.77
  -1 -10   3    1.44    0.80
  -1 -10   3    0.16    0.51
   0  10  -3    9.38    1.18
   0 -10   3    8.41    1.03
  -1  10  -3    2.40    0.78
   1 -10   3    1.69    0.71
  -2  10  -3    4.08    0.82
  -2  10  -3    4.76    0.71
   2 -10   3    4.91    0.98
   3 -10   3    3.53    0.96
   4 -10   3    0.33    0.85
   5 -10   3    0.55    0.89
   6 -10   3   10.35    1.47
  11   9  -3    0.15    1.10
  10   9  -3    7.44    1.47
  10   9  -3    8.85    2.18
   9   9  -3    5.69    1.36
   9   9  -3    9.34    2.05
   8   9  -3    0.87    0.95
   8   9  -3   -1.06    1.17
   7   9  -3    2.24    1.11
   7   9  -3    3.04    1.04
   7   9  -3    3.13    1.43
  -7  -9   3    1.08    0.41
  -7  -9   3    2.54    0.62
   6   9  -3   42.95    2.93
   6   9  -3   43.88    3.05
   6   9  -3   44.24    2.28
  -6  -9   3   44.41    1.85
  -6  -9   3   46.49    1.54
   5   9  -3    8.25    1.59
   5   9  -3    6.02    1.08
   5   9  -3    7.31    1.57
  -5  -9   3    7.38    0.77
  -5  -9   3   10.51    1.11
   4   9  -3   -0.22    0.97
   4   9  -3    0.64    0.67
   4   9  -3    0.41    0.98
  -4  -9   3   -0.22    0.57
  -4  -9   3   -0.01    0.43
   3   9  -3    9.57    1.57
   3   9  -3    2.69    0.99
   3   9  -3    5.92    0.96
  -3  -9   3    7.60    1.03
  -3  -9   3    9.30    0.89
   2   9  -3    0.15    0.82
   2   9  -3    0.42    0.66
  -2  -9   3    0.87    0.64
  -2  -9   3    1.12    0.54
   1   9  -3   10.15    1.35
   1   9  -3    7.84    1.04
  -1  -9   3   10.86    1.23
  -1  -9   3    9.59    0.93
   0   9  -3    0.76    0.72
   0   9  -3    1.73    0.74
   0  -9   3    2.14    0.64
   0  -9   3    2.24    0.78
  -1   9  -3    4.78    0.71
  -1   9  -3    6.45    0.97
   1  -9   3    5.03    0.83
   1  -9   3    4.31    0.85
  -2   9  -3    7.77    0.79
  -2   9  -3    8.69    1.00
   2  -9   3    8.79    1.06
   2  -9   3    7.96    1.03
   3  -9   3    0.73    0.73
   3  -9   3    0.00    0.65
   4  -9   3    9.76    1.22
   4  -9   3    9.40    1.26
   5  -9   3    3.99    0.98
   6  -9   3   13.09    1.51
   7  -9   3    1.98    1.03
  11   8  -3    8.78    1.61
  11   8  -3    2.58    1.66
  10   8  -3    1.90    1.52
  10   8  -3    3.69    1.19
   9   8  -3    3.59    1.23
   9   8  -3    3.01    1.43
   9   8  -3    5.24    1.16
   8   8  -3    2.30    1.42
   8   8  -3    3.32    1.00
   8   8  -3    1.81    1.12
   7   8  -3   10.50    1.36
   7   8  -3   13.19    2.05
   7   8  -3   10.04    1.58
  -7  -8   3   10.65    0.73
  -7  -8   3   10.86    0.85
  -7  -8   3   11.35    0.95
   6   8  -3   13.90    2.03
   6   8  -3   13.88    1.89
   6   8  -3   16.54    1.51
  -6  -8   3   14.47    1.12
  -6  -8   3   14.25    0.88
   5   8  -3   12.41    1.31
   5   8  -3   10.37    1.56
   5   8  -3    9.68    1.69
  -5  -8   3   11.92    1.11
  -5  -8   3   11.35    0.84
   4   8  -3   35.44    1.79
   4   8  -3   32.46    2.39
   4   8  -3   32.01    1.48
   4   8  -3   30.06    2.31
  -4  -8   3   33.57    1.83
  -4  -8   3   29.44    1.26
  -4  -8   3   29.52    1.57
   3   8  -3   11.67    1.02
   3   8  -3   11.82    1.17
   3   8  -3   13.66    1.72
   3   8  -3   12.02    1.68
  -3  -8   3   11.31    0.90
  -3  -8   3   11.39    1.10
  -3  -8   3   12.73    1.16
   2   8  -3    2.24    1.00
   2   8  -3    2.48    0.71
   2   8  -3    2.32    1.03
  -2  -8   3    2.95    0.69
  -2  -8   3    3.36    0.72
  -2  -8   3    2.30    0.54
   1   8  -3   39.89    1.80
   1   8  -3   36.63    2.07
   1   8  -3   39.25    2.57
   1   8  -3   40.45    1.60
  -1  -8   3   37.71    1.51
  -1  -8   3   36.19    1.77
   0   8  -3   59.94    2.21
   0   8  -3   60.77    3.11
   0   8  -3   61.52    2.01
   0  -8   3   60.72    2.32
   0  -8   3   63.82    2.10
   0  -8   3   63.22    2.32
  -1   8  -3   11.79    1.09
  -1   8  -3   12.74    0.96
   1  -8   3   14.35    1.19
   1  -8   3   11.51    1.06
  -2   8  -3    0.24    0.57
  -2   8  -3    1.10    0.45
   2  -8   3    0.22    0.57
   2  -8   3    1.06    0.60
   3  -8   3    3.22    0.75
   3  -8   3    3.27    0.80
   4  -8   3   12.39    1.23
   4  -8   3   15.70    1.45
   5  -8   3   10.77    1.22
   5  -8   3   12.08    1.37
   6  -8   3    1.90    0.87
   6  -8   3    0.16    0.86
   7  -8   3    0.73    0.89
   8  -8   3    4.22    1.16
  12   7  -3    0.84    1.06
  11   7  -3    3.98    1.69
  11   7  -3    8.14    1.48
  10   7  -3    4.88    1.63
  10   7  -3    2.90    1.20
  10   7  -3    7.16    1.36
   9   7  -3    7.12    1.76
   9   7  -3    7.03    1.47
   9   7  -3    8.89    1.32
   8   7  -3    0.90    0.92
   8   7  -3   -0.58    0.92
   8   7  -3    0.53    0.78
  -8  -7   3    0.68    1.15
   7   7  -3    6.68    1.57
   7   7  -3    6.00    1.04
   7   7  -3    5.98    1.28
  -7  -7   3    5.47    0.55
  -7  -7   3    5.54    0.64
  -7  -7   3    4.63    0.66
   6   7  -3    4.28    0.87
   6   7  -3    2.99    1.03
   6   7  -3    2.14    1.10
  -6  -7   3    3.30    0.51
  -6  -7   3    4.04    0.68
   5   7  -3    0.10    0.86
   5   7  -3   -1.31    0.48
   5   7  -3    0.50    0.84
  -5  -7   3   -0.44    0.45
  -5  -7   3   -0.15    0.46
  -5  -7   3    0.41    0.37
   4   7  -3   59.77    2.22
   4   7  -3   59.75    2.95
   4   7  -3   49.19    2.68
   4   7  -3   58.76    2.10
   4   7  -3   60.85    1.96
  -4  -7   3   59.51    2.14
  -4  -7   3   58.02    1.74
  -4  -7   3   58.35    2.02
   3   7  -3    3.76    0.59
   3   7  -3    3.03    1.00
   3   7  -3    3.09    0.56
   3   7  -3    3.40    0.61
   3   7  -3    3.22    1.01
  -3  -7   3    3.77    0.55
  -3  -7   3    4.17    0.71
  -3  -7   3    4.26    0.67
   2   7  -3    1.66    0.58
   2   7  -3    1.03    0.42
   2   7  -3    0.84    0.82
   2   7  -3    1.39    0.81
  -2  -7   3    0.05    0.25
  -2  -7   3    1.23    0.54
  -2  -7   3    1.35    0.50
   1   7  -3   47.19    2.15
   1   7  -3   46.79    1.63
   1   7  -3   47.80    2.56
   1   7  -3   44.62    1.78
  -1  -7   3   44.62    1.80
  -1  -7   3   46.87    1.80
   0   7  -3   20.89    1.34
   0   7  -3   20.67    1.22
   0   7  -3   22.21    1.09
   0   7  -3   20.33    1.91
   0  -7   3   20.77    1.22
   0  -7   3   18.74    1.94
   0  -7   3   20.74    1.28
   0  -7   3   22.30    1.13
  -1   7  -3    0.25    0.37
  -1   7  -3    0.52    0.77
  -1   7  -3   -0.22    0.46
   1  -7   3   -0.07    0.43
   1  -7   3    1.54    0.85
   1  -7   3   -0.72    0.48
   1  -7   3   -0.27    0.42
  -2   7  -3    0.23    0.87
  -2   7  -3    0.60    0.50
  -2   7  -3    1.63    0.44
   2  -7   3    0.96    0.55
   2  -7   3    1.18    0.56
   3  -7   3    3.98    0.75
   3  -7   3    5.09    0.85
   4  -7   3    5.59    0.91
   4  -7   3    5.28    0.86
   5  -7   3    0.47    0.67
   5  -7   3   -0.29    0.57
   6  -7   3    6.10    1.03
   6  -7   3    4.79    0.97
   7  -7   3    0.40    0.76
   7  -7   3    0.36    0.76
   8  -7   3   -0.43    0.83
   8  -7   3    1.55    0.98
   9  -7   3    2.81    1.05
  12   6  -3    2.08    1.17
  11   6  -3    2.02    1.04
  11   6  -3    1.55    1.15
  11   6  -3    1.48    1.28
  10   6  -3    1.48    0.96
  10   6  -3    0.92    0.90
  10   6  -3    0.31    1.09
   9   6  -3    1.23    0.77
   9   6  -3   -0.02    0.79
   9   6  -3    1.24    1.05
  -9  -6   3   -0.59    1.05
   8   6  -3   16.48    1.52
   8   6  -3   16.06    2.17
   8   6  -3   18.03    1.87
  -8  -6   3   14.86    2.13
   7   6  -3    5.37    0.93
   7   6  -3    5.18    1.14
   7   6  -3    4.78    1.32
  -7  -6   3    4.34    0.49
  -7  -6   3    4.85    1.38
  -7  -6   3    3.74    0.59
  -7  -6   3    4.35    0.55
   6   6  -3    1.18    0.78
   6   6  -3    2.39    0.77
   6   6  -3    2.27    1.08
  -6  -6   3    1.93    1.01
  -6  -6   3    2.31    0.54
  -6  -6   3    2.29    0.63
  -6  -6   3    1.62    0.40
   5   6  -3   31.62    1.59
   5   6  -3   31.70    2.23
   5   6  -3   33.04    1.46
   5   6  -3   31.14    2.05
  -5  -6   3   31.12    1.13
  -5  -6   3   32.00    1.50
  -5  -6   3   31.15    1.34
   4   6  -3   50.48    1.83
   4   6  -3   48.44    1.90
   4   6  -3   49.71    2.61
   4   6  -3   51.65    1.71
  -4  -6   3   52.89    1.91
  -4  -6   3   52.39    1.78
  -4  -6   3   53.42    1.56
   3   6  -3   16.75    0.99
   3   6  -3   13.02    1.43
   3   6  -3   17.33    1.57
   3   6  -3   10.71    0.99
   3   6  -3   15.47    0.89
   3   6  -3   15.41    0.91
  -3  -6   3   16.18    1.02
  -3  -6   3   16.70    1.03
  -3  -6   3   15.68    0.83
   2   6  -3   25.78    1.27
   2   6  -3   27.42    1.15
   2   6  -3   29.15    1.88
   2   6  -3   24.84    1.17
   2   6  -3   25.02    1.66
  -2  -6   3   25.00    1.24
  -2  -6   3   25.10    1.23
   1   6  -3   66.02    1.90
   1   6  -3   62.70    2.05
   1   6  -3   64.67    2.78
  -1  -6   3   65.99    2.06
  -1  -6   3   63.03    1.87
  -1  -6   3   67.27    2.08
   0   6  -3    4.55    0.72
   0   6  -3    4.48    0.56
   0   6  -3    4.63    1.02
   0   6  -3    4.05    0.62
   0  -6   3    4.46    0.58
   0  -6   3    4.31    0.65
  -1   6  -3    0.94    0.36
  -1   6  -3   -0.09    0.38
  -1   6  -3    1.14    0.76
   1  -6   3    0.08    0.40
   1  -6   3    0.16    0.73
   1  -6   3    1.23    0.46
   1  -6   3    0.44    0.46
  -2   6  -3   24.89    1.79
  -2   6  -3   21.38    0.90
  -2   6  -3   20.43    1.04
   2  -6   3   20.83    1.12
   2  -6   3   21.53    1.85
   2  -6   3   20.95    1.20
   2  -6   3   21.26    1.24
   3  -6   3    1.25    0.56
   3  -6   3    1.13    0.89
   3  -6   3    1.07    0.55
   4  -6   3    0.43    0.54
   4  -6   3    0.08    0.52
   5  -6   3   26.25    1.49
   5  -6   3   27.26    1.60
  -6   6  -3   -0.66    0.94
   6  -6   3    1.20    0.75
   6  -6   3   -0.04    0.62
   7  -6   3    0.69    0.74
   7  -6   3   -0.87    0.68
   8  -6   3   -0.62    0.72
   8  -6   3    0.20    0.82
   9  -6   3    0.27    0.84
   9  -6   3    1.15    0.90
  12   5  -3    0.97    0.97
  12   5  -3    2.22    1.09
  12   5  -3   -0.15    1.30
  11   5  -3    0.51    1.02
  11   5  -3    0.15    0.92
  11   5  -3   -0.36    1.09
  10   5  -3    2.90    0.96
  10   5  -3    3.24    1.44
  10   5  -3    0.53    0.86
   9   5  -3   11.73    1.46
   9   5  -3   11.29    1.94
   9   5  -3    9.29    1.30
  -9  -5   3    8.64    1.78
   8   5  -3   19.04    2.20
   8   5  -3   16.54    1.68
   8   5  -3   23.02    1.57
  -8  -5   3   19.16    2.27
   7   5  -3    0.36    0.77
   7   5  -3    1.32    0.68
   7   5  -3    1.35    0.78
  -7  -5   3    1.25    0.44
  -7  -5   3    0.95    0.96
  -7  -5   3    1.19    0.43
   6   5  -3   41.24    2.22
   6   5  -3   43.76    1.77
   6   5  -3   47.29    1.91
   6   5  -3   46.08    2.64
  -6  -5   3   45.29    1.47
  -6  -5   3   44.10    1.33
  -6  -5   3   43.17    1.52
  -6  -5   3   45.58    1.83
  -6  -5   3   44.78    2.48
   5   5  -3   11.24    1.29
   5   5  -3   11.49    1.53
   5   5  -3   10.10    0.90
   5   5  -3   11.19    1.05
  -5  -5   3   10.24    0.66
  -5  -5   3   11.11    0.93
  -5  -5   3   10.99    1.34
  -5  -5   3   10.69    0.82
   4   5  -3    1.20    0.74
   4   5  -3    0.61    0.54
   4   5  -3    0.69    0.39
   4   5  -3    0.56    0.49
   4   5  -3    1.30    0.40
  -4  -5   3    0.24    0.38
  -4  -5   3    1.09    0.41
  -4  -5   3   -0.43    0.60
  -4  -5   3    0.52    0.29
   3   5  -3   29.93    1.83
   3   5  -3   33.07    1.41
   3   5  -3   35.90    1.92
   3   5  -3   36.87    1.38
   3   5  -3   34.88    1.25
  -3  -5   3   34.34    1.40
  -3  -5   3   36.27    1.36
  -3  -5   3   33.46    1.14
   2   5  -3   36.45    1.24
   2   5  -3   33.74    1.77
   2   5  -3   36.45    1.38
   2   5  -3   36.46    1.34
   2   5  -3   38.75    1.97
  -2  -5   3   36.59    1.39
  -2  -5   3   35.09    1.34
   1   5  -3   19.64    0.90
   1   5  -3   19.06    1.04
   1   5  -3   20.79    1.53
   1   5  -3   21.58    1.27
   1   5  -3   18.58    0.93
  -1  -5   3   20.42    1.01
  -1  -5   3   20.80    1.02
  -1  -5   3   19.86    1.60
  -1  -5   3   19.26    0.91
   0   5  -3    6.27    0.97
   0   5  -3    6.59    0.74
   0   5  -3    6.64    0.69
   0   5  -3    7.14    0.61
   0  -5   3    6.95    0.63
   0  -5   3    4.72    0.60
   0  -5   3    4.44    0.55
  -1   5  -3   36.15    1.12
  -1   5  -3   33.24    1.84
  -1   5  -3   32.65    1.23
   1  -5   3   33.39    1.33
   1  -5   3   36.59    1.38
   1  -5   3   33.27    1.24
  -2   5  -3    4.24    0.50
  -2   5  -3    4.18    0.41
  -2   5  -3    4.07    0.86
   2  -5   3    3.29    0.55
   2  -5   3    3.27    0.91
   2  -5   3    4.71    0.58
   2  -5   3    4.29    0.59
   3  -5   3   -0.04    0.39
   3  -5   3   -0.05    0.41
   3  -5   3    0.21    0.40
   3  -5   3    1.02    0.76
   4  -5   3   23.43    1.30
   4  -5   3   22.56    1.81
   4  -5   3   22.83    1.20
   5  -5   3   27.84    1.41
   5  -5   3   30.50    1.54
  -6   5  -3    0.24    0.97
   6  -5   3   -0.32    0.53
   6  -5   3   -0.26    0.52
   7  -5   3    1.04    0.67
   7  -5   3   -0.56    0.53
   8  -5   3    4.65    0.96
   8  -5   3    4.88    0.98
   9  -5   3   -0.42    0.70
   9  -5   3   -0.55    0.71
  10  -5   3    0.06    0.83
  10  -5   3    0.34    0.83
  12   4  -3    0.52    1.29
  12   4  -3    1.82    0.95
  11   4  -3    3.07    1.40
  11   4  -3    3.93    1.10
  11   4  -3    3.07    1.02
  11   4  -3    2.50    1.07
  10   4  -3    1.37    0.86
  10   4  -3    0.49    0.77
  10   4  -3    0.87    1.12
   9   4  -3    1.54    0.81
   9   4  -3    1.45    0.82
   9   4  -3   -0.85    0.88
  -9  -4   3    0.27    1.12
   8   4  -3    1.03    0.70
   8   4  -3    1.39    0.73
   8   4  -3    1.26    0.96
  -8  -4   3    1.65    1.09
   7   4  -3    0.47    0.68
   7   4  -3    1.80    0.89
   7   4  -3    0.93    0.61
  -7  -4   3    0.65    0.36
  -7  -4   3    0.69    0.38
  -7  -4   3    0.44    0.56
  -7  -4   3    1.27    0.92
  -7  -4   3    0.72    0.31
   6   4  -3   10.63    1.05
   6   4  -3   12.47    1.30
   6   4  -3    9.98    0.94
  -6  -4   3   10.07    0.63
  -6  -4   3   10.02    1.36
  -6  -4   3    9.57    0.72
  -6  -4   3    9.30    0.74
  -6  -4   3   11.16    1.04
   5   4  -3    3.29    0.79
   5   4  -3    3.37    0.65
   5   4  -3    2.80    0.54
   5   4  -3    2.84    0.88
  -5  -4   3    2.14    0.77
  -5  -4   3    2.17    0.53
  -5  -4   3    2.08    0.45
  -5  -4   3    3.19    0.40
   4   4  -3    5.48    0.63
   4   4  -3    4.66    0.81
   4   4  -3    5.29    0.70
   4   4  -3    5.67    1.02
   4   4  -3    5.80    0.57
  -4  -4   3    4.90    0.64
  -4  -4   3    5.69    0.59
  -4  -4   3    5.77    0.49
  -4  -4   3    4.69    0.85
   3   4  -3  396.50    8.26
   3   4  -3  394.41    9.48
   3   4  -3  413.74    7.82
   3   4  -3  397.26    8.93
   3   4  -3  390.03    8.02
  -3  -4   3  398.39    7.67
  -3  -4   3  398.00    8.33
  -3  -4   3  399.31    7.86
  -3  -4   3  394.62    9.11
  -3  -4   3  392.70    8.86
   2   4  -3   13.21    0.78
   2   4  -3   14.80    0.74
   2   4  -3   13.03    1.20
  -2  -4   3   15.12    1.35
  -2  -4   3   14.23    0.83
  -2  -4   3   14.19    0.80
   1   4  -3   10.67    0.63
   1   4  -3   10.13    0.66
   1   4  -3   11.22    1.10
   1   4  -3   11.40    0.76
   1   4  -3   10.21    0.90
  -1  -4   3    9.42    0.63
  -1  -4   3   10.12    0.70
  -1  -4   3    9.97    0.72
  -1  -4   3   10.71    1.18
   0   4  -3   34.04    1.17
   0   4  -3   31.50    1.64
   0   4  -3   32.38    1.03
   0   4  -3   32.59    1.21
   0   4  -3   32.42    1.13
   0  -4   3   34.13    1.11
   0  -4   3   32.20    1.19
   0  -4   3   33.93    1.18
  -1   4  -3   68.69    2.46
  -1   4  -3   75.13    1.71
   1  -4   3   74.50    1.88
   1  -4   3   71.57    1.94
  -2   4  -3    0.45    0.58
   2  -4   3    0.05    0.30
   2  -4   3    0.43    0.34
   2  -4   3    0.43    0.63
   2  -4   3    0.39    0.33
   3  -4   3   35.89    1.39
   3  -4   3   38.24    1.36
   3  -4   3   35.64    1.26
   3  -4   3   35.22    1.93
   4  -4   3   56.62    1.90
   4  -4   3   59.69    1.79
   4  -4   3   58.19    2.56
  -5   4  -3    0.54    0.77
   5  -4   3   -0.10    0.44
   5  -4   3   -0.01    0.42
   5  -4   3    0.41    0.72
  -6   4  -3    1.04    0.98
   6  -4   3   -0.19    0.48
   6  -4   3    1.36    0.61
  -7   4  -3    0.93    1.16
   7  -4   3    1.37    0.64
   7  -4   3    0.64    0.57
   8  -4   3   11.63    1.16
   8  -4   3   11.46    1.21
   9  -4   3    1.10    0.80
   9  -4   3    1.50    0.76
  10  -4   3   -0.15    0.80
  10  -4   3   -0.14    0.75
  11  -4   3    1.95    1.02
  12   3  -3    4.88    1.63
  12   3  -3    5.57    1.24
  11   3  -3    4.56    1.15
  11   3  -3    5.06    1.56
  11   3  -3    3.99    1.04
  10   3  -3    4.29    1.35
  10   3  -3    2.52    0.92
  10   3  -3    2.34    0.93
   9   3  -3   -0.03    0.99
   9   3  -3    1.80    0.75
   9   3  -3    3.07    0.92
   9   3  -3    3.41    0.91
  -9  -3   3    3.09    1.28
   8   3  -3    4.93    0.96
   8   3  -3    6.36    1.42
   8   3  -3    6.20    0.95
  -8  -3   3    4.18    1.26
   7   3  -3    8.13    0.97
   7   3  -3   10.04    1.53
   7   3  -3    9.48    1.11
   7   3  -3    8.72    1.01
  -7  -3   3    8.53    0.69
  -7  -3   3    7.92    0.65
  -7  -3   3    8.54    0.57
  -7  -3   3    6.40    1.25
  -7  -3   3    6.93    0.93
   6   3  -3   -0.51    0.44
   6   3  -3   -0.08    0.39
   6   3  -3    0.57    0.52
   6   3  -3   -0.20    0.38
  -6  -3   3    0.29    0.31
  -6  -3   3    0.14    0.34
  -6  -3   3   -0.33    0.40
  -6  -3   3    0.36    0.27
  -6  -3   3   -0.92    0.57
   5   3  -3    1.83    0.45
   5   3  -3    1.21    0.52
   5   3  -3    2.37    0.57
   5   3  -3    0.82    0.55
  -5  -3   3    1.63    0.66
  -5  -3   3    1.64    0.38
  -5  -3   3    1.90    0.33
  -5  -3   3    2.06    0.42
  -5  -3   3    1.62    0.48
   4   3  -3   31.42    1.29
   4   3  -3   29.31    1.73
   4   3  -3   31.90    1.10
   4   3  -3   31.46    1.28
   4   3  -3   30.99    1.56
  -4  -3   3   32.18    1.32
  -4  -3   3   32.59    1.59
  -4  -3   3   31.25    1.00
  -4  -3   3   33.87    1.70
  -4  -3   3   33.08    1.15
   3   3  -3  163.70    3.79
   3   3  -3  168.71    4.57
   3   3  -3  168.26    3.53
   3   3  -3  162.56    3.72
   3   3  -3  163.03    4.22
  -3  -3   3  165.26    4.12
  -3  -3   3  167.39    3.86
  -3  -3   3  168.93    3.58
  -3  -3   3  163.80    3.43
  -3  -3   3  164.04    4.37
   2   3  -3    3.07    0.43
   2   3  -3    3.64    0.41
   2   3  -3    3.63    0.65
   2   3  -3    5.21    0.73
  -2  -3   3    4.80    0.81
  -2  -3   3    3.41    0.37
  -2  -3   3    3.33    0.47
  -2  -3   3    3.21    0.42
  -2  -3   3    3.42    0.76
  -2  -3   3    3.31    0.47
   1   3  -3    1.22    0.52
   1   3  -3    0.90    0.25
   1   3  -3   -0.11    0.21
   1   3  -3    0.69    0.29
   1   3  -3    1.46    0.45
  -1  -3   3    1.34    0.34
  -1  -3   3    0.87    0.27
  -1  -3   3    1.20    0.32
  -1  -3   3    1.17    0.53
  -1  -3   3    1.82    0.61
   0   3  -3   24.98    0.88
   0   3  -3   26.17    0.88
   0   3  -3   23.38    0.91
   0   3  -3   26.51    0.79
   0   3  -3   23.11    1.24
   0   3  -3   24.65    0.78
   0  -3   3   24.76    0.92
   0  -3   3   25.97    0.89
   0  -3   3   25.13    1.12
   0  -3   3   25.46    0.86
  -1   3  -3   14.16    1.02
  -1   3  -3   14.45    0.65
   1  -3   3   13.44    0.65
   1  -3   3   13.65    0.65
  -2   3  -3   10.63    0.93
   2  -3   3   10.36    0.67
   2  -3   3   10.53    0.62
   2  -3   3    9.46    0.60
  -3   3  -3  100.13    2.77
   3  -3   3  101.59    3.13
   3  -3   3  101.04    2.31
   3  -3   3   97.27    2.49
  -4   3  -3   33.62    1.90
   4  -3   3   32.26    1.15
   4  -3   3   31.88    1.26
   4  -3   3   31.66    1.06
   4  -3   3   34.35    1.79
  -5   3  -3    6.07    1.13
  -5   3  -3    5.23    0.98
   5  -3   3    4.42    0.56
   5  -3   3    5.69    0.98
   5  -3   3    4.15    0.59
   5  -3   3    4.33    0.60
  -6   3  -3   40.19    2.58
   6  -3   3   35.62    1.43
   6  -3   3   34.87    1.48
   6  -3   3   37.00    1.56
   6  -3   3   37.92    2.11
  -7   3  -3   31.36    2.59
   7  -3   3   29.52    1.43
   7  -3   3   30.91    1.51
   7  -3   3   30.78    1.54
   8  -3   3    7.47    0.97
   8  -3   3    5.77    0.90
   9  -3   3    5.13    0.94
   9  -3   3    5.45    0.97
  10  -3   3    5.69    1.05
  10  -3   3    5.56    1.10
  11  -3   3    0.18    0.89
  12   2  -3   13.61    1.70
  12   2  -3   16.45    2.36
  11   2  -3    4.99    1.14
  11   2  -3    6.44    1.26
  11   2  -3    4.55    1.56
  10   2  -3    0.24    0.99
  10   2  -3    0.41    0.71
  10   2  -3   -0.60    0.62
   9   2  -3    8.56    1.22
   9   2  -3   11.99    1.25
   9   2  -3   10.73    1.68
   8   2  -3    2.32    0.71
   8   2  -3    1.44    0.61
   8   2  -3    1.18    0.90
   8   2  -3   -0.38    0.59
  -8  -2   3    0.85    0.98
   7   2  -3    0.28    0.54
   7   2  -3    0.97    0.53
   7   2  -3    1.11    0.80
   7   2  -3    0.98    0.56
  -7  -2   3    0.48    0.29
  -7  -2   3    0.92    0.60
  -7  -2   3    0.89    0.37
  -7  -2   3    0.41    0.75
   6   2  -3   14.13    1.05
   6   2  -3   13.35    1.51
   6   2  -3   13.91    1.16
   6   2  -3   13.65    1.03
  -6  -2   3   14.55    1.10
  -6  -2   3   14.76    0.78
  -6  -2   3   13.42    0.81
  -6  -2   3   13.49    1.49
  -6  -2   3   13.77    0.69
   5   2  -3   25.32    1.18
   5   2  -3   24.79    1.34
   5   2  -3   24.00    1.19
   5   2  -3   24.35    1.60
  -5  -2   3   23.73    1.24
  -5  -2   3   24.06    0.99
  -5  -2   3   22.96    0.93
  -5  -2   3   23.18    0.87
   4   2  -3   62.45    2.12
   4   2  -3   63.00    1.63
   4   2  -3   61.07    1.89
   4   2  -3   59.11    1.83
  -4  -2   3   59.97    1.62
  -4  -2   3   61.42    1.95
  -4  -2   3   62.96    2.25
  -4  -2   3   64.22    1.69
  -4  -2   3   59.35    1.54
   3   2  -3    0.49    0.43
   3   2  -3    1.51    0.53
   3   2  -3    1.64    0.39
   3   2  -3    1.84    0.33
   3   2  -3    1.96    0.45
  -3  -2   3    2.20    0.45
  -3  -2   3    2.23    0.37
  -3  -2   3    1.29    0.26
  -3  -2   3    1.09    0.53
   2   2  -3   53.42    1.35
   2   2  -3   54.78    1.79
   2   2  -3   55.32    1.52
   2   2  -3   51.46    1.84
  -2  -2   3   52.61    1.86
  -2  -2   3   53.77    1.38
  -2  -2   3   54.70    1.33
  -2  -2   3   54.04    1.55
  -2  -2   3   56.02    1.98
   1   2  -3   28.79    1.14
   1   2  -3   27.92    0.93
   1   2  -3   29.77    0.93
   1   2  -3   27.55    0.81
   1   2  -3   28.23    1.18
   1   2  -3   28.14    0.81
  -1  -2   3   27.69    0.85
  -1  -2   3   28.35    1.27
  -1  -2   3   29.42    0.97
  -1  -2   3   29.64    1.20
  -1  -2   3   28.83    0.84
   0   2  -3    4.70    0.30
   0   2  -3    4.42    0.31
   0   2  -3    3.86    0.38
   0   2  -3    4.17    0.36
   0   2  -3    5.74    0.58
   0   2  -3    3.96    0.35
   0  -2   3    4.53    0.35
   0  -2   3    3.43    0.60
   0  -2   3    4.62    0.41
   0  -2   3    5.10    0.47
   0  -2   3    4.53    0.36
  -1   2  -3    0.46    0.35
  -1   2  -3    0.06    0.18
  -1   2  -3   -0.30    0.39
   1  -2   3    0.13    0.16
   1  -2   3    0.05    0.21
   1  -2   3   -0.12    0.20
   1  -2   3    0.16    0.20
  -2   2  -3   11.44    0.97
   2  -2   3   11.04    0.48
  -3   2  -3   98.72    3.11
   3  -2   3   94.29    2.76
   3  -2   3   94.94    2.35
   3  -2   3   97.04    2.30
  -4   2  -3    4.45    0.85
  -4   2  -3    6.61    1.08
   4  -2   3    5.35    0.59
   4  -2   3    5.01    0.54
   4  -2   3    4.80    0.45
   4  -2   3    5.12    0.79
  -5   2  -3   17.67    1.74
  -5   2  -3   16.54    1.55
   5  -2   3   16.64    1.02
   5  -2   3   16.85    0.83
   5  -2   3   17.30    0.93
   5  -2   3   18.49    1.34
  -6   2  -3   65.91    3.23
   6  -2   3   65.81    1.90
   6  -2   3   62.63    2.52
   6  -2   3   65.87    2.07
   6  -2   3   67.39    2.30
  -7   2  -3    1.19    1.03
   7  -2   3    0.44    0.47
   7  -2   3    0.46    0.58
   7  -2   3    0.74    0.49
   7  -2   3    0.64    0.71
   8  -2   3    4.67    0.76
   8  -2   3    3.02    0.71
   8  -2   3    3.63    0.87
   9  -2   3   11.70    1.14
   9  -2   3   10.74    1.18
  10  -2   3    9.00    1.19
  10  -2   3   10.37    1.24
  11  -2   3    1.81    0.98
  12   1  -3    0.32    0.91
  12   1  -3    0.15    1.28
  11   1  -3    0.67    1.06
  11   1  -3    0.82    0.96
  11   1  -3    1.00    0.88
  10   1  -3    5.81    1.12
  10   1  -3    7.02    1.14
  10   1  -3    4.98    1.43
   9   1  -3   15.62    1.45
   9   1  -3   17.21    2.00
   9   1  -3   16.07    1.49
   8   1  -3   16.95    1.29
   8   1  -3   17.27    1.88
   8   1  -3   18.71    1.46
  -8  -1   3   12.99    1.75
   7   1  -3   21.34    1.38
   7   1  -3   19.69    1.25
   7   1  -3   23.11    1.80
   7   1  -3   22.01    1.45
  -7  -1   3   23.13    1.52
  -7  -1   3   20.43    0.96
  -7  -1   3   20.79    0.89
   6   1  -3   15.79    1.06
   6   1  -3   15.82    1.12
   6   1  -3   13.89    1.46
   6   1  -3   15.02    1.13
  -6  -1   3   14.05    0.72
  -6  -1   3   16.74    1.21
  -6  -1   3   14.34    0.75
  -6  -1   3   14.65    0.83
   5   1  -3   26.38    1.33
   5   1  -3   28.73    1.27
   5   1  -3   25.77    1.20
   5   1  -3   26.66    1.60
   5   1  -3   26.33    1.28
  -5  -1   3   26.33    0.98
  -5  -1   3   26.47    0.93
  -5  -1   3   27.60    1.07
  -5  -1   3   28.68    1.39
   4   1  -3   20.27    0.99
   4   1  -3   20.03    1.04
   4   1  -3   18.72    0.99
   4   1  -3   18.63    1.29
   4   1  -3   19.82    1.11
   4   1  -3   21.13    0.82
  -4  -1   3   20.83    1.13
  -4  -1   3   21.50    1.23
  -4  -1   3   19.83    0.90
  -4  -1   3   19.27    0.78
  -4  -1   3   21.26    0.83
   3   1  -3  120.13    2.76
   3   1  -3  123.98    2.58
   3   1  -3  119.76    3.01
   3   1  -3  117.46    2.90
   3   1  -3  117.27    2.74
  -3  -1   3  121.08    3.13
  -3  -1   3  114.89    2.56
  -3  -1   3  115.72    2.95
   2   1  -3   74.72    2.21
   2   1  -3   73.47    1.89
   2   1  -3   74.04    2.02
   2   1  -3   74.52    1.67
  -2  -1   3   73.67    1.65
  -2  -1   3   74.48    2.28
  -2  -1   3   74.89    2.09
  -2  -1   3   71.37    1.92
  -2  -1   3   76.18    1.69
   1   1  -3    5.41    0.56
   1   1  -3    4.31    0.34
   1   1  -3    4.18    0.45
   1   1  -3    4.46    0.40
   1   1  -3    4.51    0.33
   1   1  -3    4.84    0.39
  -1  -1   3    5.91    0.59
  -1  -1   3    4.45    0.43
  -1  -1   3    4.69    0.33
  -1  -1   3    4.62    0.53
  -1  -1   3    4.46    0.35
   0   1  -3    2.69    0.36
   0   1  -3    3.16    0.26
   0   1  -3    2.95    0.34
   0  -1   3    3.26    0.36
   0  -1   3    3.21    0.23
   0  -1   3    3.27    0.31
   0  -1   3    3.21    0.27
   0  -1   3    2.23    0.37
   0  -1   3    3.10    0.24
  -1   1  -3    9.44    0.86
   1  -1   3    9.57    0.55
   1  -1   3    9.78    0.78
  -2   1  -3   55.54    2.03
   2  -1   3   57.29    1.79
   2  -1   3   55.30    1.86
  -3   1  -3    6.40    0.93
   3  -1   3    7.50    0.76
  -4   1  -3    0.22    0.68
  -4   1  -3    1.28    0.76
   4  -1   3    0.36    0.27
   4  -1   3    0.08    0.45
   4  -1   3    0.24    0.44
  -5   1  -3   55.58    2.72
   5  -1   3   56.50    2.12
   5  -1   3   56.90    2.00
   5  -1   3   54.79    1.66
  -6   1  -3   38.10    2.55
   6  -1   3   47.44    2.05
   6  -1   3   46.32    1.94
   6  -1   3   46.54    1.62
   6  -1   3   47.20    1.42
  -7   1  -3    1.53    1.05
   7  -1   3    1.23    0.72
   7  -1   3    1.30    0.65
   7  -1   3    0.72    0.48
   7  -1   3    1.63    0.50
  -8   1  -3    3.76    1.33
   8  -1   3    5.19    0.79
   8  -1   3    4.57    0.72
   8  -1   3    5.31    1.07
   9  -1   3    6.65    0.95
   9  -1   3    6.03    0.89
   9  -1   3    5.95    1.18
  10  -1   3   -0.71    0.65
  11  -1   3    1.22    0.89
  12   0  -3    1.72    1.02
  12   0  -3    4.70    1.53
  11   0  -3   10.51    1.39
  11   0  -3   10.38    1.55
  11   0  -3   12.02    1.90
  10   0  -3   10.58    1.31
  10   0  -3   13.09    1.52
  10   0  -3   10.29    1.65
   9   0  -3   11.38    1.33
   9   0  -3   10.50    1.22
   9   0  -3   17.00    1.96
   8   0  -3    1.37    0.71
   8   0  -3    1.37    0.66
   8   0  -3    2.56    0.95
   7   0  -3   21.94    1.73
   7   0  -3   21.77    1.40
   7   0  -3   20.83    1.28
  -7   0   3   20.73    0.91
  -7   0   3   20.07    0.88
  -7   0   3   22.54    0.98
  -7   0   3   18.43    1.50
   6   0  -3   22.91    1.37
   6   0  -3   23.20    1.24
   6   0  -3   21.18    1.59
   6   0  -3   24.06    1.34
  -6   0   3   24.80    1.53
  -6   0   3   24.53    1.06
  -6   0   3   23.35    0.94
  -6   0   3   25.20    0.96
   5   0  -3    0.31    0.52
   5   0  -3    1.44    0.49
   5   0  -3    0.41    0.39
   5   0  -3    0.68    0.41
  -5   0   3    0.71    0.50
  -5   0   3    0.96    0.38
  -5   0   3    0.79    0.31
  -5   0   3    1.06    0.33
   4   0  -3   38.81    1.49
   4   0  -3   39.24    1.76
   4   0  -3   39.93    1.55
   4   0  -3   41.62    1.39
  -4   0   3   41.49    1.65
  -4   0   3   40.06    1.19
  -4   0   3   39.88    1.59
  -4   0   3   40.22    1.18
  -4   0   3   40.15    1.31
   3   0  -3   16.31    0.80
   3   0  -3   15.81    0.89
   3   0  -3   15.40    0.88
   3   0  -3   14.79    1.01
  -3   0   3   15.20    0.95
  -3   0   3   15.57    0.74
  -3   0   3   15.02    0.66
  -3   0   3   15.54    0.92
   2   0  -3   74.84    2.16
   2   0  -3   72.35    1.92
   2   0  -3   71.42    1.91
  -2   0   3   74.46    1.97
  -2   0   3   75.60    1.64
  -2   0   3   72.75    1.65
  -2   0   3   75.63    2.19
  -2   0   3   70.26    1.97
   1   0  -3   12.80    0.45
   1   0  -3   11.76    0.59
   1   0  -3   12.56    0.52
   1   0  -3   13.49    0.61
   1   0  -3   13.11    0.72
  -1   0   3   12.25    0.64
  -1   0   3   11.05    0.71
  -1   0   3   12.62    0.55
  -1   0   3   12.93    0.66
  -1   0   3   11.51    0.46
   0   0  -3   34.66    0.81
   0   0  -3   33.22    0.82
   0   0   3   35.96    0.87
   0   0   3   34.48    0.89
   1   0   3  504.54   10.90
  -2   0  -3    1.01    0.64
   2   0   3    1.18    0.51
   2   0   3    1.00    0.63
  -3   0  -3   23.45    1.57
   3   0   3   23.93    1.41
   3   0   3   24.83    1.36
  -4   0  -3    4.89    1.02
  -4   0  -3    3.84    1.06
   4   0   3    4.89    0.87
  -5   0  -3   36.51    2.27
   5   0   3   39.82    1.97
   5   0   3   39.19    1.29
   5   0   3   42.29    1.51
  -6   0  -3    0.66    0.87
   6   0   3    2.33    0.84
   6   0   3    1.73    0.46
   6   0   3    1.12    0.53
  -7   0  -3   24.19    2.44
   7   0   3   17.31    1.28
   7   0   3   19.65    0.98
   7   0   3   18.04    1.63
   7   0   3   17.62    1.12
  -8   0  -3   52.58    3.43
   8   0   3   50.02    1.97
   8   0   3   49.57    1.76
   8   0   3   53.91    2.63
   8   0   3   48.94    2.14
   9   0   3    0.11    0.59
   9   0   3    0.10    0.84
   9   0   3    0.20    0.60
  10   0   3    3.73    0.93
  10   0   3    3.85    1.19
  11   0   3   11.50    1.41
  12  -1  -3    0.54    0.95
  11  -1  -3   12.78    1.90
  11  -1  -3   10.35    1.42
  10  -1  -3    4.46    1.25
  10  -1  -3    3.22    0.98
  10  -1  -3    4.21    1.08
   9  -1  -3    1.20    0.73
   9  -1  -3    2.67    0.85
   9  -1  -3    3.86    1.18
   8  -1  -3   26.69    1.66
   8  -1  -3   28.82    2.02
   8  -1  -3   24.96    1.54
   7  -1  -3    4.84    1.02
   7  -1  -3    3.81    0.73
   7  -1  -3    4.95    0.80
  -7   1   3    3.38    0.46
  -7   1   3    4.43    0.58
   6  -1  -3    2.25    0.59
   6  -1  -3    3.25    0.61
   6  -1  -3    3.61    0.76
   6  -1  -3    2.09    0.63
   6  -1  -3    3.19    0.83
  -6   1   3    2.28    0.45
  -6   1   3    2.76    0.75
  -6   1   3    3.06    0.55
  -6   1   3    2.76    0.43
   5  -1  -3   36.43    1.41
   5  -1  -3   34.76    1.62
   5  -1  -3   35.74    1.36
   5  -1  -3   36.36    1.76
   5  -1  -3   36.35    1.52
  -5   1   3   32.26    1.11
  -5   1   3   33.78    1.72
  -5   1   3   35.27    1.30
  -5   1   3   34.51    1.17
   4  -1  -3   41.47    1.41
   4  -1  -3   40.36    1.51
   4  -1  -3   42.69    1.40
   4  -1  -3   40.43    1.75
   4  -1  -3   40.37    1.64
  -4   1   3   41.27    1.38
  -4   1   3   40.66    1.57
  -4   1   3   41.39    1.23
  -4   1   3   40.33    1.77
  -4   1   3   42.14    1.26
   3  -1  -3    0.39    0.33
   3  -1  -3    0.29    0.29
   3  -1  -3    1.01    0.36
   3  -1  -3    1.25    0.45
   3  -1  -3    0.23    0.38
  -3   1   3    0.44    0.46
  -3   1   3    0.73    0.33
  -3   1   3   -0.04    0.35
  -3   1   3    0.31    0.24
  -3   1   3    0.81    0.27
   2  -1  -3    2.52    0.46
   2  -1  -3    2.24    0.39
   2  -1  -3    2.58    0.50
  -2   1   3    1.86    0.30
  -2   1   3    2.37    0.50
  -2   1   3    3.06    0.45
  -2   1   3    2.19    0.46
  -2   1   3    2.85    0.39
   1  -1  -3    8.42    0.48
   1  -1  -3    7.70    0.52
   1  -1  -3    8.15    0.62
   1  -1  -3    7.47    0.39
  -1   1   3    9.17    0.71
  -1   1   3    7.62    0.54
  -1   1   3    7.11    0.48
  -1   1   3    7.53    0.42
  -1   1   3    7.78    0.66
   0  -1  -3   10.75    0.43
   0  -1  -3   11.33    0.48
   0   1   3   11.12    0.56
   0   1   3   10.85    0.35
   0   1   3   10.52    0.46
   2   1   3    3.22    0.76
  -3  -1  -3    4.14    0.93
   3   1   3    2.82    0.91
   3   1   3    3.07    0.73
  -4  -1  -3   25.74    1.89
   4   1   3   24.47    1.76
   4   1   3   25.38    1.59
  -5  -1  -3    6.79    1.29
   5   1   3    6.47    1.16
   5   1   3    7.18    0.63
  -6  -1  -3   38.42    2.53
   6   1   3   36.51    1.43
   6   1   3   36.47    1.43
   6   1   3   36.92    2.20
  -7  -1  -3   41.91    2.86
   7   1   3   46.88    1.74
   7   1   3   39.69    2.41
   7   1   3   44.37    1.74
  -8  -1  -3   71.33    3.97
   8   1   3   69.04    2.47
   8   1   3   74.73    2.48
   8   1   3   72.66    3.33
   8   1   3   70.41    2.11
   9   1   3    3.09    0.77
   9   1   3    3.57    0.72
   9   1   3    2.26    1.09
  10   1   3   15.40    2.03
  10   1   3   16.22    1.45
  11   1   3   17.69    1.72
  11   1   3   18.90    2.23
  12   1   3    6.28    1.30
  11  -2  -3    2.12    1.00
  11  -2  -3    3.31    1.31
  10  -2  -3    7.67    1.31
  10  -2  -3    8.31    1.52
  10  -2  -3    6.50    1.19
   9  -2  -3    1.94    0.76
   9  -2  -3    1.27    0.77
   9  -2  -3    0.59    0.85
   8  -2  -3    7.96    1.04
   8  -2  -3    7.37    1.27
   8  -2  -3    9.05    1.09
   7  -2  -3   20.30    1.33
   7  -2  -3   20.26    1.65
   7  -2  -3   23.34    1.50
  -7   2   3   20.93    0.93
  -7   2   3   20.12    1.04
   6  -2  -3    2.82    0.82
   6  -2  -3    1.30    0.53
   6  -2  -3    2.84    0.77
   6  -2  -3    1.85    0.56
   6  -2  -3    1.75    0.62
  -6   2   3    1.71    0.39
  -6   2   3    0.87    0.43
  -6   2   3    1.26    0.67
  -6   2   3    1.66    0.44
   5  -2  -3   21.64    1.21
   5  -2  -3   21.24    1.14
   5  -2  -3   20.62    1.34
   5  -2  -3   19.22    1.32
   5  -2  -3   23.12    1.14
  -5   2   3   19.18    1.45
  -5   2   3   21.96    0.90
  -5   2   3   18.87    0.94
  -5   2   3   21.37    1.06
   4  -2  -3   27.27    1.22
   4  -2  -3   25.12    1.12
   4  -2  -3   26.40    1.37
   4  -2  -3   28.20    1.17
  -4   2   3   24.32    0.99
  -4   2   3   26.18    0.96
  -4   2   3   24.67    1.51
  -4   2   3   26.21    1.12
   3  -2  -3    0.92    0.40
   3  -2  -3    0.37    0.42
   3  -2  -3    0.83    0.36
   3  -2  -3    0.20    0.44
   3  -2  -3    0.64    0.36
  -3   2   3    1.00    0.56
  -3   2   3    0.36    0.35
  -3   2   3    0.33    0.29
  -3   2   3   -0.37    0.29
   2  -2  -3   54.98    1.57
   2  -2  -3   52.11    1.76
   2  -2  -3   52.48    1.48
  -2   2   3   51.87    1.58
  -2   2   3   53.89    1.41
  -2   2   3   53.14    1.79
  -2   2   3   52.57    1.52
  -2   2   3   54.51    1.93
   1  -2  -3   11.40    0.76
   1  -2  -3    9.64    0.58
   1  -2  -3    9.34    0.52
   1  -2  -3    9.12    0.54
  -1   2   3   10.58    0.59
  -1   2   3   11.29    0.62
  -1   2   3   10.33    0.51
  -1   2   3    9.95    0.85
   0  -2  -3    2.93    0.22
   0  -2  -3    2.43    0.39
   0  -2  -3    2.60    0.23
   0  -2  -3    2.16    0.28
   0   2   3    2.42    0.28
   0   2   3    2.31    0.48
   0   2   3    2.87    0.32
   0   2   3    2.32    0.31
   0   2   3    2.61    0.27
   1   2   3    4.75    0.42
   1   2   3    7.25    0.38
   2   2   3   -0.04    0.16
  -3  -2  -3   -0.49    0.68
   3   2   3    0.72    0.98
   3   2   3   -0.28    0.32
  -4  -2  -3   16.07    1.72
   4   2   3   16.08    1.38
   4   2   3   17.72    1.85
  -5  -2  -3   45.25    2.62
   5   2   3   46.55    1.37
   5   2   3   43.51    2.48
   5   2   3   41.30    2.16
  -6  -2  -3    7.61    1.48
   6   2   3    7.34    0.77
   6   2   3    7.62    0.70
   6   2   3    6.40    1.32
  -7  -2  -3   34.71    2.72
   7   2   3   33.57    2.35
   7   2   3   32.53    1.42
   7   2   3   32.86    1.56
  -8  -2  -3   -1.11    0.88
   8   2   3    0.41    0.44
   8   2   3    1.57    1.07
   8   2   3    1.59    0.64
   8   2   3    0.92    0.54
   9   2   3   -0.41    0.49
   9   2   3    0.61    1.05
   9   2   3    0.78    0.63
  10   2   3   -0.45    1.01
  10   2   3   -0.69    0.56
  11   2   3    5.13    1.11
  11   2   3    4.20    1.47
  12   2   3    9.22    1.40
  12   2   3   10.86    1.99
  11  -3  -3    1.03    0.88
  10  -3  -3    4.70    1.06
  10  -3  -3    0.31    1.01
   9  -3  -3    2.54    0.85
   9  -3  -3    3.24    0.97
   9  -3  -3    3.42    1.13
   8  -3  -3    5.91    1.13
   8  -3  -3    2.70    0.82
   8  -3  -3    3.59    0.91
   7  -3  -3   24.73    1.78
   7  -3  -3   30.35    1.68
   7  -3  -3   25.97    1.54
  -7   3   3   27.97    1.24
  -7   3   3   26.81    1.07
  -7   3   3   27.51    1.25
   6  -3  -3    6.97    1.08
   6  -3  -3    6.19    0.84
   6  -3  -3    6.28    0.87
  -6   3   3    6.68    0.75
  -6   3   3    5.78    0.59
  -6   3   3    5.70    0.69
   5  -3  -3   53.00    1.88
   5  -3  -3   55.94    2.02
   5  -3  -3   57.06    2.33
   5  -3  -3   52.48    1.86
  -5   3   3   56.07    1.82
  -5   3   3   53.21    2.44
  -5   3   3   52.24    1.58
  -5   3   3   51.45    1.69
   4  -3  -3    7.83    0.77
   4  -3  -3    8.75    0.80
   4  -3  -3    8.89    1.05
   4  -3  -3    7.63    0.77
  -4   3   3    8.54    0.74
  -4   3   3    8.47    1.09
  -4   3   3    7.50    0.62
  -4   3   3    7.47    0.75
   3  -3  -3   15.31    1.16
   3  -3  -3   19.90    0.94
   3  -3  -3   17.44    0.95
   3  -3  -3   18.08    0.99
  -3   3   3   17.70    0.94
  -3   3   3   18.38    1.35
  -3   3   3   18.17    0.87
  -3   3   3   17.18    0.99
   2  -3  -3  126.38    3.42
   2  -3  -3  126.23    2.96
   2  -3  -3  130.72    3.08
  -2   3   3  122.46    2.84
  -2   3   3  129.62    3.12
  -2   3   3  128.13    3.00
   1  -3  -3    1.21    0.33
   1  -3  -3    1.56    0.36
   1  -3  -3    1.80    0.51
  -1   3   3    1.16    0.34
  -1   3   3    1.55    0.34
  -1   3   3    1.67    0.36
  -1   3   3    1.76    0.60
   0  -3  -3    7.27    0.50
   0  -3  -3    8.51    0.41
   0  -3  -3    9.16    0.76
   0  -3  -3    8.00    0.43
   0  -3  -3    7.06    0.46
   0   3   3    6.76    0.51
   0   3   3    7.71    0.48
   0   3   3    8.43    0.84
  -1  -3  -3   23.65    0.76
  -1  -3  -3   24.52    0.94
   1   3   3   23.09    1.11
   1   3   3   24.77    0.71
   1   3   3   22.93    0.82
   2   3   3    0.05    0.27
   2   3   3    0.18    0.22
   3   3   3    3.72    0.36
   3   3   3    3.99    0.97
   3   3   3    2.36    1.25
  -4  -3  -3    5.04    1.19
   4   3   3    4.67    0.43
   4   3   3    5.19    1.03
   4   3   3    6.44    1.41
  -5  -3  -3   66.57    3.28
   5   3   3   66.62    3.32
   5   3   3   67.38    2.19
   5   3   3   70.41    1.84
   5   3   3   72.00    3.00
  -6  -3  -3    0.59    0.95
   6   3   3   -0.20    0.59
   6   3   3    0.38    0.96
   6   3   3    0.34    0.36
   6   3   3    1.45    0.52
  -7  -3  -3    1.10    1.12
   7   3   3    1.16    0.57
   7   3   3    2.38    1.16
   7   3   3    1.44    0.48
  -8  -3  -3   12.35    2.15
   8   3   3   12.82    0.93
   8   3   3   10.02    0.96
   8   3   3   12.55    1.24
   8   3   3   15.31    2.15
   9   3   3    2.50    1.32
   9   3   3    3.48    0.71
   9   3   3    3.74    0.88
  10   3   3    0.96    1.17
  10   3   3    0.38    0.72
  11   3   3    3.16    1.02
  11   3   3    1.70    1.28
  12   3   3    2.98    1.09
  12   3   3    5.10    1.66
  10  -4  -3    4.06    1.06
   9  -4  -3    3.51    0.93
   8  -4  -3    2.16    0.81
   8  -4  -3    1.22    0.72
   7  -4  -3    0.74    0.63
   7  -4  -3    0.09    0.60
  -7   4   3    0.26    0.36
  -7   4   3    0.64    0.48
  -7   4   3    0.06    0.41
   6  -4  -3   23.91    1.47
   6  -4  -3   24.33    1.42
  -6   4   3   22.42    1.23
  -6   4   3   21.78    1.04
  -6   4   3   23.30    1.25
   5  -4  -3   -0.22    0.45
   5  -4  -3   -0.07    0.47
   5  -4  -3   -0.94    0.40
   5  -4  -3    0.14    0.55
  -5   4   3    0.47    0.36
  -5   4   3   -0.39    0.64
  -5   4   3   -0.06    0.41
  -5   4   3   -0.01    0.41
   4  -4  -3    2.02    0.54
   4  -4  -3    1.26    0.48
   4  -4  -3    1.87    0.69
  -4   4   3    1.23    0.46
  -4   4   3    2.15    0.86
  -4   4   3    1.54    0.47
   3  -4  -3   68.92    2.02
   3  -4  -3   71.98    2.19
   3  -4  -3   74.00    2.61
   3  -4  -3   71.80    2.15
  -3   4   3   70.54    2.05
  -3   4   3   75.20    2.85
  -3   4   3   72.36    2.23
  -3   4   3   71.20    2.13
   2  -4  -3   38.12    1.75
   2  -4  -3   36.73    1.26
   2  -4  -3   39.84    1.39
   2  -4  -3   36.41    1.37
  -2   4   3   34.26    1.86
  -2   4   3   37.28    1.39
  -2   4   3   37.68    1.41
   1  -4  -3   30.86    1.17
   1  -4  -3   30.15    1.06
   1  -4  -3   30.76    1.51
   1  -4  -3   30.56    1.18
  -1   4   3   30.55    1.11
  -1   4   3   30.57    1.19
  -1   4   3   29.84    1.17
  -1   4   3   26.56    1.60
   0  -4  -3  285.78    5.63
   0  -4  -3  274.75    5.91
   0  -4  -3  289.35    6.38
   0  -4  -3  282.24    5.53
   0   4   3  283.92    5.97
   0   4   3  289.42    6.66
   0   4   3  280.82    5.65
  -1  -4  -3    7.28    0.37
  -1  -4  -3    7.36    0.53
  -1  -4  -3    6.92    0.75
  -1  -4  -3    8.00    0.44
   1   4   3    6.88    0.55
   1   4   3    6.74    0.53
  -2  -4  -3   -0.02    0.22
   2   4   3    0.47    0.27
   2   4   3    0.02    0.23
   2   4   3    0.19    0.55
   3   4   3    2.23    0.36
   3   4   3    0.90    0.83
   3   4   3    3.55    0.36
   3   4   3    3.96    1.03
   4   4   3   63.38    3.37
   4   4   3   67.47    2.95
   4   4   3   66.92    1.77
   5   4   3   39.31    2.78
   5   4   3   42.64    1.38
   5   4   3   42.29    1.85
   5   4   3   42.96    2.39
  -6  -4  -3   -0.27    0.86
   6   4   3    0.17    0.35
   6   4   3    0.79    1.08
   6   4   3   -0.80    0.61
   6   4   3    0.28    0.58
  -7  -4  -3   28.27    2.85
   7   4   3   26.74    2.78
   7   4   3   29.10    1.69
   7   4   3   29.42    1.19
   7   4   3   30.18    1.32
   7   4   3   28.01    2.11
  -8  -4  -3   -0.28    1.17
   8   4   3   -0.57    0.64
   8   4   3    0.51    0.50
   8   4   3   -0.74    1.04
   8   4   3   -0.14    0.46
   9   4   3    0.25    0.70
   9   4   3    1.80    0.62
   9   4   3    2.25    1.29
  10   4   3    2.54    1.44
  10   4   3    2.97    0.95
  11   4   3   -1.13    0.74
  11   4   3   -0.52    1.27
  12   4   3    2.83    1.56
  12   4   3    1.07    0.95
  10  -5  -3    1.47    0.93
   9  -5  -3    0.75    0.85
   8  -5  -3   -0.10    0.68
   7  -5  -3   11.87    1.29
   7  -5  -3   13.61    1.39
  -7   5   3   10.96    0.95
  -7   5   3   12.12    0.82
  -7   5   3   12.88    1.04
   6  -5  -3    0.29    0.56
   6  -5  -3    0.71    0.62
  -6   5   3    0.82    0.50
  -6   5   3    0.73    0.43
  -6   5   3    0.50    0.53
   5  -5  -3    8.47    1.02
   5  -5  -3    5.97    0.85
   5  -5  -3    5.90    0.90
  -5   5   3    7.40    0.86
  -5   5   3    7.45    0.86
  -5   5   3    7.82    0.72
   4  -5  -3   73.40    2.41
   4  -5  -3   75.36    2.30
  -4   5   3   75.00    2.30
  -4   5   3   73.74    3.25
  -4   5   3   74.66    2.35
   3  -5  -3   64.12    2.13
   3  -5  -3   68.05    2.69
   3  -5  -3   67.63    2.20
  -3   5   3   67.10    2.07
  -3   5   3   69.45    2.97
  -3   5   3   66.59    2.14
   2  -5  -3   23.25    1.14
   2  -5  -3   20.46    1.10
   2  -5  -3   21.14    1.02
   2  -5  -3   20.80    1.48
  -2   5   3   21.77    1.13
  -2   5   3   21.37    1.70
  -2   5   3   22.63    1.14
   1  -5  -3   30.82    1.63
   1  -5  -3   31.31    1.25
   1  -5  -3   31.10    1.16
   1  -5  -3   30.29    1.23
  -1   5   3   30.72    1.26
  -1   5   3   29.23    1.24
  -1   5   3   29.62    1.22
  -1   5   3   27.54    1.78
   0  -5  -3  164.80    3.68
   0  -5  -3  171.56    3.87
   0  -5  -3  168.97    3.56
   0   5   3  165.77    3.74
   0   5   3  164.84    3.89
  -1  -5  -3    0.35    0.28
  -1  -5  -3    0.16    0.25
  -1  -5  -3    0.11    0.20
   1   5   3    0.05    0.31
   1   5   3   -0.16    0.25
   1   5   3    0.41    0.65
  -2  -5  -3   -0.07    0.23
   2   5   3   -0.45    0.55
   2   5   3    0.31    0.30
   2   5   3    0.35    0.30
  -3  -5  -3  103.55    2.43
   3   5   3   99.00    4.51
   3   5   3  105.60    2.44
   3   5   3  104.19    2.58
   4   5   3    0.08    0.69
   4   5   3   -0.23    0.28
   4   5   3    0.59    0.93
   4   5   3    0.08    0.29
   5   5   3    4.38    0.55
   5   5   3    4.25    1.07
   5   5   3    6.05    0.59
   6   5   3    8.72    0.73
   6   5   3    9.26    1.77
   6   5   3    7.66    0.75
   6   5   3    8.13    1.12
   6   5   3    9.55    1.50
   7   5   3    5.31    1.03
   7   5   3    8.13    0.80
   7   5   3    7.18    0.78
   7   5   3    8.23    1.82
  -8  -5  -3   12.25    2.26
   8   5   3   14.62    2.33
   8   5   3   12.21    1.07
   8   5   3   13.03    1.44
   8   5   3   12.66    1.03
   9   5   3    0.02    0.74
   9   5   3    0.66    0.60
   9   5   3    3.47    1.48
  10   5   3    8.62    1.98
  10   5   3    5.81    1.18
  11   5   3    1.64    0.94
  11   5   3    0.97    1.55
  12   5   3   -0.45    1.36
  12   5   3    0.28    0.97
   9  -6  -3    1.05    0.87
   8  -6  -3    4.45    1.06
   7  -6  -3    4.25    0.99
  -7   6   3    4.22    0.75
  -7   6   3    4.20    0.68
  -7   6   3    3.95    0.58
   6  -6  -3    0.46    0.63
   6  -6  -3   -0.62    0.55
  -6   6   3    0.80    0.56
  -6   6   3   -0.46    0.39
  -6   6   3    0.08    0.54
   5  -6  -3    1.89    0.66
   5  -6  -3    1.45    0.67
  -5   6   3    2.62    0.66
  -5   6   3    1.99    0.51
  -5   6   3    1.94    0.64
   4  -6  -3   35.77    1.73
   4  -6  -3   37.06    1.75
   4  -6  -3   36.92    1.60
  -4   6   3   36.16    1.66
  -4   6   3   34.81    1.65
   3  -6  -3    0.18    0.42
   3  -6  -3    1.12    0.59
   3  -6  -3    0.59    0.48
  -3   6   3    0.36    0.47
  -3   6   3    1.01    0.54
  -3   6   3    2.31    1.00
   2  -6  -3    0.29    0.40
   2  -6  -3   -0.05    0.42
   2  -6  -3   -0.14    0.36
  -2   6   3    0.06    0.41
  -2   6   3    0.15    0.38
  -2   6   3   -0.27    0.68
  -2   6   3    0.07    0.24
   1  -6  -3   37.37    1.48
   1  -6  -3   38.08    1.50
   1  -6  -3   35.32    1.33
  -1   6   3   35.62    1.48
  -1   6   3   37.83    1.52
  -1   6   3   37.39    1.52
  -1   6   3   34.99    2.16
   0  -6  -3    4.68    0.60
   0  -6  -3    4.71    0.54
   0  -6  -3    5.83    0.64
   0   6   3    3.82    0.60
   0   6   3    4.92    0.62
  -1  -6  -3    1.88    0.41
  -1  -6  -3    2.04    0.35
  -1  -6  -3    1.89    0.43
   1   6   3    1.81    0.82
   1   6   3    2.55    0.48
   1   6   3    2.34    0.52
  -2  -6  -3   29.47    1.15
   2   6   3   31.53    1.26
   2   6   3   28.85    1.22
  -3  -6  -3   52.43    1.58
   3   6   3   53.61    3.43
   3   6   3   50.99    1.68
   3   6   3   53.51    1.67
   4   6   3    4.87    1.50
   4   6   3    3.64    1.12
   4   6   3    5.32    0.65
   4   6   3    4.48    0.58
   5   6   3   40.08    1.49
   5   6   3   41.80    2.57
   5   6   3   39.38    1.47
   6   6   3   21.23    1.12
   6   6   3   21.77    1.82
   6   6   3   20.27    2.56
   6   6   3   20.58    1.14
   6   6   3   22.52    2.01
   7   6   3   -0.09    0.41
   7   6   3   -0.37    0.50
   7   6   3   -1.07    0.99
   7   6   3    0.64    0.79
   8   6   3    3.21    1.08
   8   6   3    1.42    1.39
   8   6   3    2.22    0.72
   9   6   3   11.03    1.18
   9   6   3   10.23    1.48
   9   6   3    9.75    2.25
  10   6   3   -0.04    0.80
  10   6   3    1.44    1.44
  11   6   3    0.60    0.90
  11   6   3    1.60    1.62
  12   6   3   -2.55    1.26
   9  -7  -3    0.03    0.88
   8  -7  -3    0.44    0.88
   7  -7  -3    0.90    0.74
  -7   7   3    0.48    0.43
  -7   7   3   -0.28    0.45
   6  -7  -3    0.80    0.70
  -6   7   3   -0.46    0.40
  -6   7   3   -0.02    0.62
   5  -7  -3    3.90    0.80
  -5   7   3    4.21    0.86
  -5   7   3    3.84    0.65
   4  -7  -3    0.15    0.51
   4  -7  -3    1.19    0.69
   4  -7  -3    0.85    0.58
  -4   7   3    0.29    0.58
   3  -7  -3    8.47    1.04
   3  -7  -3    8.47    0.99
   3  -7  -3    9.07    0.93
  -3   7   3    7.51    0.97
  -3   7   3    9.33    1.59
   2  -7  -3   20.21    1.32
   2  -7  -3   23.38    1.33
   2  -7  -3   23.96    1.26
  -2   7   3   22.07    1.36
  -2   7   3   21.53    2.17
   1  -7  -3    5.93    0.76
   1  -7  -3    8.40    0.80
   1  -7  -3    6.11    0.80
  -1   7   3    6.11    0.79
  -1   7   3    2.11    0.89
  -1   7   3    6.99    0.86
   0  -7  -3   -0.08    0.43
   0  -7  -3   -0.08    0.37
   0  -7  -3   -0.11    0.34
   0   7   3   -0.44    0.45
   0   7   3    0.32    0.80
   0   7   3   -0.29    0.32
  -1  -7  -3    3.81    0.60
  -1  -7  -3    3.80    0.56
  -1  -7  -3    3.96    0.48
   1   7   3    3.80    0.60
   1   7   3    3.47    0.67
  -2  -7  -3   20.78    0.91
  -2  -7  -3   20.14    1.05
  -2  -7  -3   21.44    0.78
   2   7   3   22.64    1.23
   2   7   3   21.54    1.12
  -3  -7  -3    6.38    0.64
   3   7   3    6.54    1.81
   3   7   3    6.73    0.83
   3   7   3    5.88    0.69
  -4  -7  -3    4.05    0.57
   4   7   3    4.22    0.60
   4   7   3    4.18    1.26
   4   7   3    1.20    1.35
   4   7   3    5.29    0.77
   5   7   3   40.54    1.62
   5   7   3   41.52    1.67
   5   7   3   40.17    2.69
   5   7   3   44.59    3.46
   6   7   3    0.75    0.90
   6   7   3    0.36    0.55
   6   7   3    0.30    0.43
   6   7   3    0.34    1.26
   6   7   3    1.36    1.00
   7   7   3    9.25    1.04
   7   7   3    9.09    1.51
   7   7   3    5.44    1.78
   8   7   3    8.73    1.51
   8   7   3    6.02    0.97
   8   7   3    4.92    1.83
   9   7   3    7.84    2.24
   9   7   3    7.46    1.43
   9   7   3    7.22    1.11
  10   7   3    5.27    1.95
  10   7   3    5.41    1.29
  11   7   3   -0.41    0.93
  11   7   3   -1.37    1.45
   8  -8  -3   -0.26    0.81
   7  -8  -3    5.98    1.15
   6  -8  -3    3.43    0.90
  -6   8   3    3.90    0.89
  -6   8   3    3.95    0.66
   5  -8  -3    2.92    0.79
  -5   8   3    3.83    0.92
   4  -8  -3    0.41    0.53
  -4   8   3   -0.02    0.60
   3  -8  -3   48.24    1.94
   3  -8  -3   46.39    2.09
  -3   8   3   46.41    2.10
   2  -8  -3   22.78    1.31
   2  -8  -3   23.23    1.47
  -2   8   3   24.20    1.52
   1  -8  -3    2.11    0.67
   1  -8  -3    1.80    0.55
   1  -8  -3    2.82    0.75
  -1   8   3    2.52    0.67
   0  -8  -3    2.95    0.59
   0  -8  -3    1.93    0.59
   0  -8  -3    1.14    0.59
   0   8   3    1.96    0.71
  -1  -8  -3    0.20    0.36
  -1  -8  -3    0.61    0.48
  -1  -8  -3    0.78    0.49
   1   8   3    0.61    0.57
  -2  -8  -3   36.55    1.51
  -2  -8  -3   34.20    1.32
  -2  -8  -3   37.71    1.17
   2   8   3   37.17    1.69
   2   8   3   38.34    1.76
   2   8   3   36.94    3.27
  -3  -8  -3    0.89    0.42
   3   8   3    2.12    1.61
   3   8   3    0.75    0.56
   4   8   3   17.79    2.17
   4   8   3   23.10    1.38
   4   8   3   17.31    2.68
   5   8   3   33.34    1.67
   5   8   3   35.39    3.64
   5   8   3   36.83    2.72
   6   8   3    6.11    1.41
   6   8   3    8.42    2.09
   6   8   3    7.31    1.01
   7   8   3   11.84    1.23
   7   8   3   11.56    1.79
   7   8   3   12.78    2.46
   8   8   3   29.13    2.50
   8   8   3   27.46    1.75
   8   8   3   27.17    3.30
   9   8   3    2.36    1.62
   9   8   3    2.55    0.96
   9   8   3   -0.95    0.90
  10   8   3    1.97    1.21
  10   8   3    1.87    1.63
  10   8   3    4.55    1.15
  11   8   3    0.75    1.13
  11   8   3   -1.51    1.45
   7  -9  -3    4.48    1.15
   6  -9  -3    2.44    0.87
  -6   9   3    3.63    0.93
  -6   9   3    2.67    0.63
   5  -9  -3    6.18    1.05
  -5   9   3    7.87    1.19
   4  -9  -3    0.66    0.71
  -4   9   3   -0.43    0.70
   3  -9  -3   18.45    1.39
   3  -9  -3   19.52    1.54
  -3   9   3   19.24    1.56
   2  -9  -3    0.04    0.58
   2  -9  -3   -1.04    0.50
  -2   9   3   -0.46    0.64
   1  -9  -3    1.16    0.58
   1  -9  -3    0.91    0.64
  -1   9   3    0.42    0.63
   0  -9  -3    1.99    0.58
   0  -9  -3    2.46    0.69
   0   9   3    1.23    0.73
  -1  -9  -3   12.50    1.09
  -1  -9  -3   12.76    0.88
   1   9   3   15.03    1.37
  -2  -9  -3   13.90    1.01
  -2  -9  -3   16.36    0.85
   2   9   3   14.93    1.35
   2   9   3   15.11    2.64
   3   9   3   -0.27    0.60
   3   9   3    0.89    1.50
   4   9   3   29.39    1.73
   4   9   3   31.99    2.71
   4   9   3   31.45    3.52
   5   9   3    1.22    0.73
   5   9   3   -1.86    1.29
   6   9   3    2.25    1.30
   6   9   3    0.86    1.41
   6   9   3    0.73    0.74
   7   9   3   31.16    1.91
   7   9   3   34.47    2.83
   7   9   3   29.72    3.56
   8   9   3   27.20    1.87
   8   9   3   20.96    3.21
   8   9   3   26.47    2.63
   9   9   3    3.02    1.06
   9   9   3    2.47    1.35
   9   9   3    3.73    1.98
  10   9   3    2.48    1.73
  10   9   3    2.35    1.08
  10   9   3   -1.05    1.04
  11   9   3   10.18    1.92
   6 -10  -3    0.58    0.81
  -6  10   3    0.95    0.56
   5 -10  -3   12.18    1.49
  -5  10   3   10.90    1.34
  -5  10   3    7.88    0.92
   4 -10  -3    1.10    0.79
  -4  10   3    0.34    0.85
   3 -10  -3    0.66    0.71
  -3  10   3    0.65    0.81
   2 -10  -3    7.94    1.03
   2 -10  -3    7.90    1.13
  -2  10   3    5.57    1.10
   1 -10  -3    0.74    0.59
   1 -10  -3    0.63    0.70
  -1  10   3   -0.85    0.64
   0 -10  -3    9.01    0.92
   0 -10  -3   10.29    1.15
   0  10   3    7.37    1.10
  -1 -10  -3    2.56    0.71
  -1 -10  -3    1.84    0.57
   1  10   3    0.79    0.79
   1  10   3   -0.43    1.64
  -2 -10  -3    7.04    0.68
  -2 -10  -3    5.08    0.77
   2  10   3    5.55    2.04
   2  10   3    7.37    1.15
   3  10   3    4.32    0.97
   3  10   3    7.72    2.21
   4  10   3    1.92    0.88
   4  10   3    5.85    2.06
   5  10   3    0.94    1.55
   5  10   3   -0.09    0.75
   6  10   3    9.65    1.86
   6  10   3   12.70    2.69
   6  10   3   11.53    1.40
   7  10   3   17.97    1.70
   7  10   3   20.85    3.19
   7  10   3   16.36    2.40
   8  10   3    0.22    0.87
   8  10   3   -1.22    1.17
   8  10   3    1.15    1.75
   9  10   3    3.66    1.21
   9  10   3    2.75    1.43
   9  10   3    0.05    1.64
  10  10   3   13.50    2.86
  10  10   3   15.67    2.34
  10  10   3   17.01    1.86
   5 -11  -3   -0.10    0.90
  -5  11   3   -0.25    0.86
  -5  11   3   -0.72    0.49
   4 -11  -3    2.96    0.93
  -4  11   3    2.40    1.00
   3 -11  -3    5.93    1.05
  -3  11   3    4.74    1.13
   2 -11  -3   -0.26    0.64
   2 -11  -3    0.86    0.87
  -2  11   3   -0.20    0.88
   1 -11  -3    3.43    0.78
   1 -11  -3    3.46    1.04
  -1  11   3    3.37    1.11
   0 -11  -3    0.78    0.55
   0 -11  -3   -0.76    0.67
   0  11   3    0.11    1.79
   0  11   3   -0.58    0.72
  -1 -11  -3    2.79    0.65
  -1 -11  -3    3.01    0.86
   1  11   3    3.57    2.01
   1  11   3   -0.04    0.77
  -2 -11  -3    3.83    0.60
  -2 -11  -3    3.39    0.76
   2  11   3   -0.75    1.67
   2  11   3    4.89    1.11
   3  11   3   -0.91    0.73
   3  11   3    0.85    1.66
   4  11   3    2.50    1.87
   4  11   3    5.60    1.16
   5  11   3    0.98    0.89
   5  11   3   -0.26    1.21
   5  11   3    0.21    1.64
   6  11   3    7.61    2.43
   6  11   3   13.32    2.30
   6  11   3   12.66    1.55
   7  11   3    0.79    1.37
   7  11   3   -1.10    0.77
   7  11   3    1.18    1.75
   8  11   3   11.89    2.20
   8  11   3   10.28    2.64
   8  11   3    8.09    1.53
   9  11   3    3.62    1.30
   9  11   3    3.02    2.03
   9  11   3    1.39    1.59
  10  11   3    1.28    1.66
  10  11   3    3.66    1.35
   3 -12  -3    9.74    1.28
  -3  12   3    7.85    1.39
   2 -12  -3   -1.12    0.87
   2 -12  -3    1.86    0.84
  -2  12   3    2.14    1.05
   1 -12  -3    0.35    0.91
   1 -12  -3    0.22    0.67
  -1  12   3    0.58    0.96
   0 -12  -3    3.67    0.75
   0 -12  -3    2.67    1.02
   0  12   3    3.58    1.12
  -1 -12  -3   -0.95    0.52
  -1 -12  -3    0.03    0.79
   1  12   3    1.58    1.03
   1  12   3   -0.10    1.80
  -2 -12  -3    1.72    0.57
  -2 -12  -3    1.89    0.74
   2  12   3    4.27    1.20
   2  12   3    0.53    1.83
   3  12   3    3.52    1.17
   3  12   3    1.53    2.04
   4  12   3    0.40    1.72
   4  12   3   -0.07    0.90
   5  12   3    5.76    1.36
   5  12   3    1.61    1.99
   6  12   3    4.42    1.28
   6  12   3    1.87    1.93
   7  12   3    3.20    2.04
   7  12   3    3.17    1.31
   8  12   3   23.11    2.24
   8  12   3   18.93    3.34
   8  12   3   23.48    3.30
   9  12   3   -0.62    1.09
   1 -13  -3    5.76    1.21
   1 -13  -3    2.95    0.83
  -1  13   3    3.04    1.21
   0 -13  -3   12.17    1.24
   0 -13  -3   11.26    1.42
   0  13   3   12.23    1.75
  -1 -13  -3   -0.25    0.78
  -1 -13  -3    1.51    0.68
   1  13   3    0.44    1.02
  -2 -13  -3    0.02    0.71
   2  13   3    1.38    1.05
   3  13   3    0.12    1.06
   3  13   3    3.23    2.18
   4  13   3    5.06    2.20
   4  13   3    7.11    1.53
   5  13   3    1.12    1.89
   5  13   3    1.62    1.23
   6  13   3    2.78    1.31
   6  13   3    2.83    2.20
   7  13   3    1.68    1.25
   7  13   3    3.35    2.15
   2  14   3    8.23    1.65
   3  14   3    3.40    1.41
   4  14   3    1.32    1.22
   7  13  -4    3.61    1.34
   7  13  -4    6.41    1.92
   6  13  -4   -0.69    1.08
  -6 -13   4    2.89    1.00
   5  13  -4    8.66    1.62
  -5 -13   4    8.93    1.37
  -5 -13   4    7.59    1.00
   4  13  -4    2.93    1.18
  -4 -13   4    0.41    0.96
  -4 -13   4    1.92    0.79
   3  13  -4    1.84    1.04
  -3 -13   4    1.11    0.79
   2  13  -4    1.32    0.98
  -2 -13   4    2.20    0.87
   1  13  -4   -1.80    0.85
  -1 -13   4    0.80    0.78
   0  13  -4    0.27    0.91
   0 -13   4   -0.05    0.75
   1 -13   4    2.51    0.94
   8  12  -4    3.23    1.31
   8  12  -4   -0.02    1.44
   7  12  -4    9.66    1.62
   7  12  -4    7.19    1.97
  -7 -12   4    7.26    1.07
   6  12  -4    5.74    1.78
   6  12  -4    7.66    1.45
  -6 -12   4    6.10    1.11
  -6 -12   4    7.74    0.91
   5  12  -4    3.91    1.20
   5  12  -4    4.19    1.56
  -5 -12   4    4.85    0.85
  -5 -12   4    3.91    1.07
   4  12  -4    3.02    1.12
  -4 -12   4    5.13    0.87
  -4 -12   4    4.67    1.14
   3  12  -4    4.82    1.18
  -3 -12   4    8.70    1.37
  -3 -12   4    6.72    1.01
   2  12  -4    0.78    0.96
  -2 -12   4    2.16    0.82
   1  12  -4   -0.38    0.85
  -1 -12   4    0.20    0.71
   0  12  -4   11.25    1.41
   0 -12   4    9.69    1.19
   1 -12   4    0.14    0.76
   2 -12   4    0.05    0.83
   3 -12   4    1.79    0.98
   9  11  -4    3.64    1.63
   9  11  -4    3.70    1.35
   8  11  -4    0.89    1.13
   8  11  -4    1.18    1.45
   7  11  -4   13.82    2.27
   7  11  -4   12.61    1.73
  -7 -11   4   13.62    1.12
  -7 -11   4   13.29    1.28
   6  11  -4    4.88    1.65
   6  11  -4    7.36    1.36
  -6 -11   4    5.17    0.78
  -6 -11   4    6.20    1.04
   5  11  -4   -0.22    1.09
   5  11  -4    0.77    0.88
  -5 -11   4    1.34    0.80
  -5 -11   4    0.42    0.58
   4  11  -4   12.58    1.54
   4  11  -4    9.11    1.71
  -4 -11   4   12.87    1.37
  -4 -11   4   14.04    1.18
   3  11  -4    4.74    1.05
  -3 -11   4    2.76    0.92
  -3 -11   4    4.80    0.86
   2  11  -4    1.22    0.84
  -2 -11   4    0.45    0.63
   1  11  -4   13.27    1.43
  -1 -11   4   12.27    1.20
   0  11  -4   11.99    1.30
   0 -11   4   12.33    1.23
  -1  11  -4    1.56    0.79
   1 -11   4    0.79    0.76
   2 -11   4    2.97    0.92
   3 -11   4   12.48    1.46
   4 -11   4    0.06    0.94
   5 -11   4   -0.28    0.94
  10  10  -4    1.34    1.56
  10  10  -4    0.11    1.11
   9  10  -4    1.50    1.08
   9  10  -4    2.02    1.48
   8  10  -4    6.73    1.85
   8  10  -4   11.40    1.64
   7  10  -4    2.79    1.11
   7  10  -4    1.59    1.23
  -7 -10   4    2.03    0.55
  -7 -10   4    2.63    0.76
   6  10  -4    0.64    0.83
   6  10  -4    1.59    1.22
  -6 -10   4    0.47    0.68
  -6 -10   4   -0.12    0.47
   5  10  -4    7.95    1.67
   5  10  -4    8.98    1.31
  -5 -10   4   10.16    1.18
  -5 -10   4   10.25    0.98
   4  10  -4   18.80    1.71
   4  10  -4   23.58    2.37
  -4 -10   4   17.71    1.18
  -4 -10   4   18.22    1.52
   3  10  -4    2.70    1.06
   3  10  -4    0.41    0.76
  -3 -10   4    2.68    0.67
  -3 -10   4    1.44    0.79
   2  10  -4   -0.01    0.79
   2  10  -4    0.14    0.69
  -2 -10   4    0.51    0.54
  -2 -10   4    0.76    0.74
   1  10  -4   46.19    2.18
  -1 -10   4   50.06    1.96
   0  10  -4    3.94    0.90
   0 -10   4    2.46    0.78
  -1  10  -4   -0.02    0.48
  -1  10  -4   -0.09    0.64
   1 -10   4   -0.24    0.63
  -2  10  -4   17.37    1.04
   2 -10   4   17.72    1.50
   3 -10   4    5.61    1.05
   4 -10   4    0.17    0.83
   5 -10   4    2.22    1.06
   6 -10   4    4.18    1.18
  11   9  -4    0.89    1.18
  10   9  -4    1.11    1.07
  10   9  -4    0.75    1.44
   9   9  -4    5.09    1.31
   9   9  -4    3.13    1.45
   8   9  -4    1.83    1.01
   8   9  -4   -0.57    1.07
   7   9  -4    0.48    0.85
   7   9  -4   -0.27    1.04
  -7  -9   4   -0.55    0.55
  -7  -9   4    0.02    0.40
   6   9  -4    7.99    1.68
   6   9  -4    5.92    1.10
  -6  -9   4    6.17    0.73
  -6  -9   4    4.82    0.90
   5   9  -4   25.12    1.71
   5   9  -4   26.06    2.32
  -5  -9   4   25.02    1.24
  -5  -9   4   21.32    1.49
   4   9  -4    0.01    0.86
   4   9  -4    0.49    0.70
  -4  -9   4    0.29    0.66
  -4  -9   4    1.29    0.54
   3   9  -4    0.84    0.87
   3   9  -4    0.49    0.65
  -3  -9   4    1.01    0.53
  -3  -9   4    1.80    0.74
   2   9  -4    6.40    1.02
   2   9  -4    7.34    1.23
  -2  -9   4    8.21    1.10
  -2  -9   4    6.98    0.82
   1   9  -4    6.63    1.05
   1   9  -4    6.88    1.00
  -1  -9   4    7.85    1.04
  -1  -9   4    6.32    1.02
  -1  -9   4    7.00    0.85
   0   9  -4    7.82    1.00
   0   9  -4    5.80    0.76
   0  -9   4    8.33    1.08
   0  -9   4    6.07    0.87
  -1   9  -4   35.83    1.49
  -1   9  -4   38.01    1.75
   1  -9   4   39.02    1.96
   1  -9   4   36.89    1.77
  -2   9  -4   11.63    0.86
  -2   9  -4   12.53    1.06
   2  -9   4   11.75    1.29
   2  -9   4   12.12    1.22
   3  -9   4    0.92    0.78
   3  -9   4   -0.28    0.66
   4  -9   4    6.54    1.13
   4  -9   4    4.70    1.07
   5  -9   4   14.54    1.51
   6  -9   4    0.05    0.83
   7  -9   4   -0.73    0.84
  11   8  -4    0.94    1.38
  11   8  -4    1.74    1.18
  10   8  -4   -0.41    0.95
  10   8  -4    0.03    1.24
   9   8  -4    0.53    0.87
   9   8  -4    1.38    1.21
   8   8  -4    0.37    0.97
   8   8  -4    0.64    1.07
   8   8  -4    0.02    0.75
   7   8  -4    0.55    0.94
   7   8  -4    1.27    0.84
   7   8  -4    0.75    1.06
  -7  -8   4    0.56    0.58
  -7  -8   4    0.95    0.43
   6   8  -4    9.84    1.30
   6   8  -4   11.13    1.65
   6   8  -4    7.07    1.54
  -6  -8   4   12.34    1.14
  -6  -8   4   11.84    0.88
   5   8  -4    3.48    1.16
   5   8  -4    1.28    1.04
   5   8  -4    3.32    0.86
  -5  -8   4    2.33    0.71
  -5  -8   4    2.22    0.52
   4   8  -4    0.11    0.61
   4   8  -4    0.01    0.87
   4   8  -4    0.73    0.60
  -4  -8   4    0.34    0.55
  -4  -8   4    0.45    0.41
   3   8  -4   20.08    1.41
   3   8  -4   21.97    1.84
   3   8  -4   25.29    2.09
  -3  -8   4   20.46    1.38
  -3  -8   4   19.82    1.12
  -3  -8   4   19.12    1.33
   2   8  -4   27.03    1.31
   2   8  -4   24.91    2.13
   2   8  -4   30.73    1.87
   2   8  -4   26.06    1.52
  -2  -8   4   25.49    1.46
  -2  -8   4   25.13    1.23
  -2  -8   4   23.67    1.50
   1   8  -4    2.38    1.02
   1   8  -4    3.85    0.65
   1   8  -4    4.07    0.78
   1   8  -4    4.92    0.95
  -1  -8   4    3.67    0.78
  -1  -8   4    4.53    0.69
  -1  -8   4    3.52    0.81
   0   8  -4    8.22    0.94
   0   8  -4    8.28    0.79
   0   8  -4    6.76    0.87
   0  -8   4    9.28    1.07
   0  -8   4    6.00    0.80
   0  -8   4    7.03    0.98
  -1   8  -4   29.43    1.46
  -1   8  -4   27.69    1.23
   1  -8   4   29.84    1.62
   1  -8   4   28.36    1.47
  -2   8  -4   -0.07    0.48
  -2   8  -4   -0.24    0.35
   2  -8   4   -0.04    0.58
   2  -8   4    0.61    0.58
   3  -8   4    1.81    0.72
   3  -8   4    1.91    0.73
   4  -8   4   31.13    1.83
   4  -8   4   25.38    1.61
   5  -8   4   10.20    1.21
   5  -8   4   12.60    1.39
   6  -8   4    3.52    0.90
   6  -8   4    3.36    0.95
   7  -8   4    6.32    1.27
   7  -8   4    3.22    1.05
   8  -8   4   -1.07    0.81
  12   7  -4    2.62    1.28
  11   7  -4    1.26    1.36
  11   7  -4    4.80    1.35
  10   7  -4    6.87    1.34
  10   7  -4    5.07    1.64
   9   7  -4    0.82    1.17
   9   7  -4    0.33    0.90
   9   7  -4    0.71    0.85
   8   7  -4    0.53    1.05
   8   7  -4   -0.31    0.68
   8   7  -4    0.22    0.84
   7   7  -4    3.87    1.18
   7   7  -4    3.66    1.28
   7   7  -4    2.54    0.86
  -7  -7   4    2.45    0.58
  -7  -7   4    3.69    0.69
  -7  -7   4    2.31    0.49
   6   7  -4    4.75    1.36
   6   7  -4    4.47    0.90
   6   7  -4    1.86    0.94
  -6  -7   4    3.60    0.57
  -6  -7   4    3.24    0.70
   5   7  -4   18.93    2.03
   5   7  -4   16.01    1.38
   5   7  -4   15.29    1.77
  -5  -7   4   16.57    1.25
  -5  -7   4   14.21    1.13
  -5  -7   4   18.31    1.00
   4   7  -4    7.55    0.95
   4   7  -4    9.78    1.44
   4   7  -4    6.10    0.80
   4   7  -4    4.69    1.08
  -4  -7   4    5.96    0.84
  -4  -7   4    7.92    0.73
  -4  -7   4    7.03    0.84
   3   7  -4   16.64    1.02
   3   7  -4   18.61    1.62
   3   7  -4   19.02    1.87
   3   7  -4   14.23    1.14
  -3  -7   4   16.47    0.94
  -3  -7   4   18.19    1.19
  -3  -7   4   15.56    1.13
   2   7  -4   -0.93    0.69
   2   7  -4   -0.18    0.46
   2   7  -4    0.43    0.38
   2   7  -4    0.92    0.70
  -2  -7   4    0.29    0.49
  -2  -7   4   -0.45    0.40
  -2  -7   4    0.12    0.18
   1   7  -4   11.22    1.48
   1   7  -4   11.58    1.06
   1   7  -4   11.84    0.84
  -1  -7   4   12.90    0.92
  -1  -7   4   11.89    1.08
   0   7  -4    0.45    0.38
   0   7  -4    0.34    0.73
   0   7  -4   -0.36    0.45
   0   7  -4   -0.04    0.45
   0  -7   4    0.51    0.42
   0  -7   4    0.06    0.48
   0  -7   4    0.02    0.49
  -1   7  -4    6.05    0.76
  -1   7  -4    6.53    0.65
  -1   7  -4    6.46    1.24
   1  -7   4    5.61    0.84
   1  -7   4    5.22    0.78
   1  -7   4    6.05    0.77
   1  -7   4    4.95    1.21
  -2   7  -4    0.52    0.34
   2  -7   4    0.25    0.53
   2  -7   4    0.35    0.56
   3  -7   4   14.55    1.22
   3  -7   4   12.33    1.08
   4  -7   4   41.10    1.83
   4  -7   4   40.78    1.93
  -5   7  -4    4.14    1.27
   5  -7   4    4.94    0.88
   5  -7   4    4.88    0.95
  -6   7  -4    5.39    1.74
   6  -7   4    4.99    0.96
   6  -7   4    3.86    0.90
   7  -7   4   18.11    1.59
   7  -7   4   20.87    1.74
   8  -7   4    5.15    1.22
   8  -7   4    5.45    1.15
   9  -7   4    5.15    1.44
   9  -7   4    4.86    1.18
  12   6  -4    1.80    1.13
  12   6  -4    2.44    1.21
  11   6  -4   10.26    1.59
  11   6  -4   10.96    2.13
  10   6  -4    0.05    0.85
  10   6  -4    0.64    0.95
  10   6  -4    1.23    1.23
   9   6  -4    6.17    1.16
   9   6  -4    5.00    1.22
   9   6  -4    6.38    1.61
  -9  -6   4    3.48    1.46
   8   6  -4   10.61    1.87
   8   6  -4    9.01    1.40
   8   6  -4    9.20    1.29
  -8  -6   4    7.27    1.64
   7   6  -4    1.59    0.81
   7   6  -4    0.31    0.66
   7   6  -4    0.57    0.93
  -7  -6   4    0.52    0.48
  -7  -6   4    0.85    0.40
  -7  -6   4    1.03    0.47
  -7  -6   4    0.41    0.92
   6   6  -4    3.18    1.05
   6   6  -4    4.48    1.12
   6   6  -4    3.81    0.84
  -6  -6   4    3.26    1.00
  -6  -6   4    3.68    0.66
  -6  -6   4    2.92    0.51
   5   6  -4   48.80    2.62
   5   6  -4   44.43    2.37
   5   6  -4   43.44    1.78
   5   6  -4   47.09    1.96
   5   6  -4   46.12    1.73
  -5  -6   4   46.46    1.48
  -5  -6   4   45.10    1.72
  -5  -6   4   43.27    1.85
   4   6  -4   16.82    1.07
   4   6  -4   16.21    0.96
   4   6  -4   17.30    1.74
   4   6  -4   21.85    1.69
  -4  -6   4   17.22    0.90
  -4  -6   4   16.22    1.14
  -4  -6   4   16.88    1.08
   3   6  -4   11.76    0.88
   3   6  -4   10.89    1.31
   3   6  -4    9.86    1.28
   3   6  -4   10.44    0.78
  -3  -6   4   10.79    0.96
  -3  -6   4    9.98    0.71
  -3  -6   4   12.62    1.03
   2   6  -4    0.19    0.67
   2   6  -4    0.59    0.60
   2   6  -4    1.47    0.43
   2   6  -4    1.01    0.51
  -2  -6   4    1.13    0.44
  -2  -6   4    0.97    0.47
   1   6  -4   13.12    0.80
   1   6  -4    8.87    0.96
   1   6  -4   14.39    1.49
   1   6  -4   11.93    0.93
  -1  -6   4   13.67    0.87
  -1  -6   4   12.71    0.95
   0   6  -4    6.38    0.62
   0   6  -4    5.90    0.68
   0   6  -4    4.67    0.99
   0   6  -4    4.98    0.67
   0  -6   4    6.34    0.77
   0  -6   4    6.21    0.66
   0  -6   4    5.82    0.73
  -1   6  -4    1.17    0.36
  -1   6  -4    0.97    0.70
  -1   6  -4    0.88    0.43
   1  -6   4    0.29    0.39
   1  -6   4    0.46    0.43
   1  -6   4    1.07    0.46
  -2   6  -4    0.54    0.76
   2  -6   4    0.63    0.46
   2  -6   4   -0.71    0.67
   2  -6   4   -0.12    0.39
   2  -6   4    0.79    0.46
  -3   6  -4   40.33    2.19
   3  -6   4   44.52    1.67
   3  -6   4   44.43    2.54
   3  -6   4   43.78    1.78
  -4   6  -4    4.11    1.08
   4  -6   4    4.88    0.77
   4  -6   4    4.95    0.80
  -5   6  -4    3.51    1.16
   5  -6   4    3.77    0.79
   5  -6   4    4.68    0.83
  -6   6  -4    5.62    1.47
   6  -6   4    5.97    0.98
   6  -6   4    7.29    1.00
   7  -6   4    9.51    1.17
   7  -6   4    9.91    1.27
   8  -6   4    3.84    0.97
   8  -6   4    4.30    1.03
   9  -6   4    1.01    0.91
   9  -6   4    1.45    0.94
  12   5  -4    2.05    1.17
  12   5  -4    1.43    1.50
  11   5  -4    1.64    1.38
  11   5  -4    0.07    0.94
  11   5  -4    0.96    0.92
  10   5  -4   -0.12    0.81
  10   5  -4   -0.72    0.85
  10   5  -4    2.18    1.26
   9   5  -4   16.32    1.55
   9   5  -4   13.83    1.68
   9   5  -4   15.32    2.10
  -9  -5   4   11.12    1.92
   8   5  -4   33.78    2.15
   8   5  -4   30.50    2.44
   8   5  -4   33.51    1.89
  -8  -5   4   35.24    2.58
  -8  -5   4   30.53    1.26
   7   5  -4    1.25    0.95
   7   5  -4    1.47    0.80
   7   5  -4    1.78    0.72
  -7  -5   4    1.13    0.39
  -7  -5   4    1.59    0.96
  -7  -5   4    0.95    0.45
  -7  -5   4    1.02    0.47
   6   5  -4   98.40    3.92
   6   5  -4  103.41    3.59
   6   5  -4  101.60    3.06
   6   5  -4   98.97    2.97
  -6  -5   4   93.77    3.64
  -6  -5   4   99.44    3.07
  -6  -5   4  101.06    2.44
  -6  -5   4  100.13    2.71
   5   5  -4   26.36    1.42
   5   5  -4   25.22    1.85
   5   5  -4   25.45    1.28
   5   5  -4   23.11    1.63
   5   5  -4   26.71    1.15
  -5  -5   4   28.00    1.76
  -5  -5   4   26.54    1.23
  -5  -5   4   25.42    1.02
  -5  -5   4   25.67    1.37
   4   5  -4    0.83    0.48
   4   5  -4    0.82    0.38
   4   5  -4    0.73    0.60
   4   5  -4    1.17    0.69
   4   5  -4    0.20    0.31
  -4  -5   4    0.10    0.42
  -4  -5   4    0.74    0.32
  -4  -5   4    1.63    0.64
  -4  -5   4    0.12    0.37
   3   5  -4    0.04    0.24
   3   5  -4    0.60    0.31
   3   5  -4   -0.56    0.27
   3   5  -4    0.27    0.59
   3   5  -4    0.20    0.61
  -3  -5   4    0.06    0.35
  -3  -5   4    0.36    0.28
  -3  -5   4    0.42    0.68
  -3  -5   4    0.41    0.43
   2   5  -4    4.11    0.61
   2   5  -4    3.02    0.44
   2   5  -4    2.58    0.48
   2   5  -4    2.30    0.70
   2   5  -4    3.30    0.76
  -2  -5   4    2.32    0.48
  -2  -5   4    2.44    0.41
  -2  -5   4    2.72    0.52
   1   5  -4   37.92    1.58
   1   5  -4   40.30    1.44
   1   5  -4   37.07    1.89
   1   5  -4   40.59    1.28
  -1  -5   4   42.50    1.45
  -1  -5   4   39.11    1.31
  -1  -5   4   38.62    1.45
  -1  -5   4   36.78    1.97
   0   5  -4    0.06    0.25
   0   5  -4    0.20    0.52
   0   5  -4    0.00    0.33
   0   5  -4    0.04    0.35
   0  -5   4   -0.20    0.30
   0  -5   4    0.63    0.37
   0  -5   4    0.34    0.37
  -1   5  -4    0.73    0.37
  -1   5  -4    0.98    0.27
  -1   5  -4    0.54    0.65
   1  -5   4    0.73    0.41
   1  -5   4    1.55    0.44
   1  -5   4    0.27    0.36
  -2   5  -4   18.59    1.41
   2  -5   4   21.44    1.08
   2  -5   4   20.88    1.11
   2  -5   4   20.55    1.01
  -3   5  -4   25.95    1.62
  -3   5  -4   22.64    1.52
   3  -5   4   21.54    1.76
   3  -5   4   21.94    1.18
   3  -5   4   21.92    1.11
   3  -5   4   21.71    1.17
  -4   5  -4   15.42    1.61
   4  -5   4   11.97    1.53
   4  -5   4   13.56    1.08
   4  -5   4   14.20    1.00
  -5   5  -4    1.59    1.00
   5  -5   4    3.29    0.65
   5  -5   4    1.55    0.61
  -6   5  -4   16.47    2.05
   6  -5   4   15.74    1.21
   6  -5   4   18.03    1.34
   7  -5   4    0.25    0.63
   7  -5   4    0.40    0.61
   8  -5   4    1.31    0.76
   8  -5   4   -0.08    0.67
   9  -5   4   12.34    1.40
   9  -5   4   11.87    1.31
  10  -5   4   -0.67    0.83
  10  -5   4   -0.14    0.81
  12   4  -4    1.27    1.05
  12   4  -4    0.95    1.34
  11   4  -4    0.20    1.22
  11   4  -4    1.24    0.88
  10   4  -4    8.27    1.27
  10   4  -4   10.00    1.47
  10   4  -4    8.19    1.27
  10   4  -4    5.27    1.55
   9   4  -4    9.66    1.34
   9   4  -4   11.03    1.33
   9   4  -4    7.32    1.61
  -9  -4   4   10.20    1.84
   8   4  -4    0.38    0.63
   8   4  -4    0.68    0.86
   8   4  -4   -0.08    0.59
  -8  -4   4    0.22    0.32
  -8  -4   4    0.01    0.91
   7   4  -4   49.06    2.34
   7   4  -4   41.97    2.55
   7   4  -4   42.99    1.94
  -7  -4   4   45.18    1.58
  -7  -4   4   45.48    1.41
  -7  -4   4   42.64    2.58
  -7  -4   4   45.91    1.59
   6   4  -4    3.06    0.81
   6   4  -4    1.78    0.89
   6   4  -4    2.54    0.62
   6   4  -4    2.81    0.66
  -6  -4   4    2.41    0.66
  -6  -4   4    2.14    0.87
  -6  -4   4    2.38    0.52
  -6  -4   4    3.91    0.48
  -6  -4   4    4.19    0.58
   5   4  -4   10.70    0.89
   5   4  -4   10.61    0.97
   5   4  -4   11.75    0.76
   5   4  -4   10.87    1.40
  -5  -4   4    9.75    0.66
  -5  -4   4   10.63    0.80
  -5  -4   4   10.52    1.21
  -5  -4   4   11.09    0.99
   4   4  -4  156.74    3.75
   4   4  -4  146.99    4.52
   4   4  -4  148.14    3.68
   4   4  -4  150.62    4.23
   4   4  -4  157.99    3.43
  -4  -4   4  151.62    3.51
  -4  -4   4  147.26    4.47
  -4  -4   4  149.32    3.30
  -4  -4   4  146.38    4.08
  -4  -4   4  150.02    3.80
   3   4  -4    6.48    0.58
   3   4  -4    6.88    0.66
   3   4  -4    6.89    0.95
   3   4  -4    7.15    1.00
  -3  -4   4    5.75    0.71
  -3  -4   4    6.60    0.66
  -3  -4   4    5.99    0.72
  -3  -4   4    4.96    0.47
  -3  -4   4    6.70    1.05
   2   4  -4    3.36    0.75
   2   4  -4    4.28    0.58
   2   4  -4    4.48    0.47
   2   4  -4    3.31    0.50
  -2  -4   4    3.19    0.48
  -2  -4   4    4.50    0.48
  -2  -4   4    4.12    0.56
  -2  -4   4    3.33    0.84
   1   4  -4   17.47    0.84
   1   4  -4   17.34    1.02
   1   4  -4   17.69    1.26
   1   4  -4   18.78    0.76
   1   4  -4   15.89    0.87
  -1  -4   4   16.80    0.80
  -1  -4   4   16.72    0.89
  -1  -4   4   15.90    0.85
  -1  -4   4   18.58    1.45
  -1  -4   4   18.33    1.27
   0   4  -4   33.51    1.15
   0   4  -4   36.48    1.66
   0   4  -4   38.65    1.06
   0   4  -4   38.32    1.23
   0  -4   4   35.46    1.17
   0  -4   4   35.39    1.23
   0  -4   4   37.19    1.56
  -1   4  -4    0.08    0.38
  -1   4  -4    0.24    0.48
   1  -4   4    0.43    0.33
   1  -4   4    0.33    0.31
   1  -4   4    0.54    0.34
  -2   4  -4   63.06    2.14
  -2   4  -4   57.25    2.12
   2  -4   4   61.19    1.66
   2  -4   4   60.54    1.79
   2  -4   4   58.17    1.71
  -3   4  -4   44.08    2.02
  -3   4  -4   40.83    1.70
   3  -4   4   41.18    1.49
   3  -4   4   44.00    2.15
   3  -4   4   40.92    1.37
  -4   4  -4   20.74    1.66
   4  -4   4   20.88    1.66
   4  -4   4   21.01    1.11
   4  -4   4   19.18    1.01
  -5   4  -4    8.80    1.47
   5  -4   4    8.52    0.85
   5  -4   4    6.66    1.20
   5  -4   4   11.17    0.87
  -6   4  -4    0.69    0.95
   6  -4   4    0.61    0.53
   6  -4   4   -0.58    0.44
  -7   4  -4    1.44    1.28
   7  -4   4    0.45    0.58
   7  -4   4    1.07    0.60
   8  -4   4   19.54    1.48
   8  -4   4   22.13    1.45
   9  -4   4   15.32    1.47
   9  -4   4   14.43    1.37
  10  -4   4    1.33    0.93
  12   3  -4    0.15    1.28
  12   3  -4    0.67    0.94
  11   3  -4    4.15    1.11
  11   3  -4    4.47    1.52
  10   3  -4    1.11    0.74
  10   3  -4    0.44    1.04
  10   3  -4    0.89    0.81
   9   3  -4   14.53    1.93
   9   3  -4   15.90    1.47
   9   3  -4   13.96    1.42
   9   3  -4   14.17    1.55
  -9  -3   4   11.44    1.91
   8   3  -4   19.23    1.44
   8   3  -4   18.57    1.43
   8   3  -4   19.84    1.61
   8   3  -4   17.92    2.02
  -8  -3   4   21.85    2.23
  -8  -3   4   20.31    0.99
   7   3  -4   17.49    1.28
   7   3  -4   17.77    1.44
   7   3  -4   15.66    1.79
  -7  -3   4   15.64    0.92
  -7  -3   4   15.20    0.82
  -7  -3   4   16.90    1.32
  -7  -3   4   16.20    0.97
  -7  -3   4   15.42    1.71
   6   3  -4    1.87    0.64
   6   3  -4    2.08    0.58
   6   3  -4    1.79    0.54
  -6  -3   4    1.85    0.39
  -6  -3   4    1.78    0.61
  -6  -3   4    3.22    0.51
  -6  -3   4    2.48    0.83
  -6  -3   4    2.14    0.48
   5   3  -4    0.67    0.63
   5   3  -4   -0.01    0.34
   5   3  -4    1.20    0.36
   5   3  -4    1.08    0.43
   5   3  -4    0.35    0.44
  -5  -3   4    0.27    0.54
  -5  -3   4    0.66    0.44
  -5  -3   4    0.46    0.36
  -5  -3   4    0.48    0.28
   4   3  -4  295.11    6.76
   4   3  -4  283.43    7.29
   4   3  -4  283.54    6.11
   4   3  -4  297.86    5.84
  -4  -3   4  284.16    5.73
  -4  -3   4  281.00    6.77
  -4  -3   4  280.71    6.36
  -4  -3   4  292.53    6.96
  -4  -3   4  290.07    5.89
   3   3  -4    2.01    0.40
   3   3  -4    0.88    0.59
   3   3  -4    1.84    0.35
   3   3  -4    1.25    0.53
  -3  -3   4    0.94    0.63
  -3  -3   4    1.80    0.37
  -3  -3   4    1.04    0.44
  -3  -3   4    1.06    0.45
   2   3  -4    2.53    0.60
   2   3  -4    2.18    0.34
   2   3  -4    2.10    0.39
   2   3  -4    2.53    0.47
  -2  -3   4    1.85    0.43
  -2  -3   4    1.72    0.33
  -2  -3   4    1.67    0.60
  -2  -3   4    1.70    0.64
  -2  -3   4    1.76    0.35
  -2  -3   4    1.76    0.37
   1   3  -4   17.31    0.77
   1   3  -4   16.67    0.94
   1   3  -4   18.32    0.68
   1   3  -4   19.66    1.12
  -1  -3   4   16.03    1.07
  -1  -3   4   17.57    0.83
  -1  -3   4   18.22    0.72
  -1  -3   4   17.98    0.75
  -1  -3   4   17.91    1.25
   0   3  -4    3.87    0.32
   0   3  -4    4.48    0.40
   0   3  -4    4.36    0.62
   0   3  -4    3.92    0.44
   0   3  -4    3.85    0.35
   0   3  -4    3.56    0.39
   0  -3   4    3.79    0.40
   0  -3   4    3.24    0.73
   0  -3   4    3.60    0.44
   0  -3   4    3.66    0.54
   0  -3   4    3.88    0.42
  -1   3  -4    0.24    0.44
  -1   3  -4    0.38    0.40
   1  -3   4   -0.11    0.25
   1  -3   4    0.14    0.23
   1  -3   4    0.30    0.31
  -2   3  -4    0.17    0.36
  -2   3  -4    0.19    0.50
   2  -3   4   -0.05    0.30
   2  -3   4    0.43    0.28
  -3   3  -4    2.12    0.71
   3  -3   4    2.67    0.43
   3  -3   4    1.91    0.36
  -4   3  -4   18.72    1.59
   4  -3   4   18.67    0.95
   4  -3   4   15.62    1.40
   4  -3   4   20.90    0.88
  -5   3  -4    4.04    1.09
   5  -3   4    2.11    0.41
   5  -3   4    3.14    0.88
   5  -3   4    1.94    0.45
   5  -3   4    1.50    0.47
  -6   3  -4   11.57    1.72
   6  -3   4   12.92    1.00
   6  -3   4   11.33    0.88
   6  -3   4   13.20    0.93
   6  -3   4   11.76    1.34
  -7   3  -4   16.15    2.20
   7  -3   4   18.97    1.15
   7  -3   4   17.14    1.22
   8  -3   4    1.37    0.66
   8  -3   4    1.39    0.63
   9  -3   4    0.52    0.70
   9  -3   4   -0.22    0.66
  10  -3   4    5.97    1.10
  12   2  -4   13.59    2.28
  12   2  -4   10.49    1.59
  11   2  -4    1.20    1.21
  11   2  -4    2.68    1.03
  10   2  -4    2.71    0.95
  10   2  -4    3.98    0.98
  10   2  -4    5.02    1.49
   9   2  -4    0.17    0.61
   9   2  -4   -0.35    0.62
   9   2  -4    0.13    0.87
   8   2  -4   27.41    1.75
   8   2  -4   27.57    2.13
   8   2  -4   26.19    1.56
  -8  -2   4   27.05    2.26
   7   2  -4   13.29    1.22
   7   2  -4   13.92    1.20
   7   2  -4   13.59    1.30
   7   2  -4   11.65    1.56
  -7  -2   4   12.74    0.84
  -7  -2   4   12.90    0.77
  -7  -2   4   14.92    1.68
  -7  -2   4   13.88    0.91
  -7  -2   4   12.85    1.30
   6   2  -4    5.30    0.79
   6   2  -4    6.14    0.88
   6   2  -4    5.04    0.75
   6   2  -4    4.42    0.74
   6   2  -4    6.00    1.05
  -6  -2   4    6.75    0.70
  -6  -2   4    5.92    0.83
  -6  -2   4    5.96    0.57
  -6  -2   4    5.10    0.59
   5   2  -4   10.47    0.70
   5   2  -4    9.66    0.89
   5   2  -4   12.31    1.11
   5   2  -4   10.82    0.92
  -5  -2   4   10.02    0.74
  -5  -2   4   11.87    0.98
  -5  -2   4   10.14    0.69
  -5  -2   4    9.80    0.63
   4   2  -4  118.62    3.61
   4   2  -4  117.30    2.92
   4   2  -4  116.45    2.68
   4   2  -4  117.69    3.04
   4   2  -4  114.68    3.24
  -4  -2   4  119.80    3.44
  -4  -2   4  116.69    2.62
  -4  -2   4  116.43    2.71
  -4  -2   4  117.44    3.12
   3   2  -4   64.20    2.11
   3   2  -4   63.84    1.87
   3   2  -4   61.21    1.62
   3   2  -4   64.46    2.28
  -3  -2   4   65.78    2.24
  -3  -2   4   66.19    1.69
  -3  -2   4   65.25    1.94
   2   2  -4   14.56    0.61
   2   2  -4   14.34    0.73
   2   2  -4   14.59    0.95
  -2  -2   4   14.32    0.62
  -2  -2   4   13.85    0.66
  -2  -2   4   14.42    1.03
  -2  -2   4   13.53    0.79
  -2  -2   4   13.56    1.03
   1   2  -4    6.77    0.65
   1   2  -4    5.47    0.45
   1   2  -4    5.83    0.38
   1   2  -4    6.24    0.64
   1   2  -4    5.04    0.39
   1   2  -4    5.65    0.47
   1   2  -4    6.06    0.48
  -1  -2   4    5.55    0.42
  -1  -2   4    6.65    0.74
  -1  -2   4    6.12    0.53
  -1  -2   4    6.22    0.44
  -1  -2   4    6.87    0.69
   0   2  -4    1.80    0.40
   0   2  -4    1.91    0.29
   0   2  -4    1.96    0.36
   0  -2   4    2.09    0.37
   0  -2   4    2.09    0.25
   0  -2   4    2.54    0.30
   0  -2   4    2.05    0.38
   0  -2   4    2.43    0.53
   0  -2   4    1.97    0.33
  -1   2  -4    0.65    0.51
  -1   2  -4    0.37    0.19
  -1   2  -4    0.66    0.29
   1  -2   4    0.62    0.46
   1  -2   4    0.03    0.16
   1  -2   4    0.42    0.19
   1  -2   4    0.58    0.35
  -2   2  -4   38.14    1.74
   2  -2   4   40.95    1.14
  -3   2  -4   -0.30    0.60
   3  -2   4    0.20    0.26
   3  -2   4    0.87    0.34
  -4   2  -4    4.36    0.96
   4  -2   4    2.70    0.41
   4  -2   4    2.53    0.49
   4  -2   4    3.22    0.74
  -5   2  -4   22.33    2.09
   5  -2   4   19.96    0.98
   5  -2   4   21.29    1.14
   5  -2   4   20.78    1.42
  -6   2  -4   24.65    2.42
   6  -2   4   27.74    1.26
   6  -2   4   27.72    1.43
   6  -2   4   28.01    1.12
   6  -2   4   29.75    1.69
  -7   2  -4   17.66    2.29
   7  -2   4   16.25    1.25
   7  -2   4   13.87    1.42
   7  -2   4   16.29    1.11
   7  -2   4   15.58    0.99
   8  -2   4    0.23    0.54
   8  -2   4    0.26    0.52
   8  -2   4    0.34    0.63
   9  -2   4    8.48    1.00
  10  -2   4    0.89    0.73
  11  -2   4    4.43    1.11
  12   1  -4   -0.33    1.20
  12   1  -4    0.13    0.96
  11   1  -4    2.97    1.00
  11   1  -4    4.79    1.48
  10   1  -4    2.88    0.93
  10   1  -4    2.98    1.25
  10   1  -4    2.57    0.97
   9   1  -4    9.99    1.65
   9   1  -4   10.67    1.23
   9   1  -4   11.06    1.32
   8   1  -4   24.26    1.64
   8   1  -4   21.89    1.47
   8   1  -4   25.96    2.05
  -8  -1   4   22.94    1.08
   7   1  -4    0.48    0.56
   7   1  -4    0.62    0.73
   7   1  -4    1.36    0.57
  -7  -1   4    0.56    0.35
  -7  -1   4    0.60    0.58
  -7  -1   4    1.31    0.44
  -7  -1   4    0.08    0.37
   6   1  -4   13.52    1.48
   6   1  -4   11.94    1.11
   6   1  -4   11.53    1.08
   6   1  -4   12.91    1.02
  -6  -1   4   14.54    0.91
  -6  -1   4   14.13    1.18
  -6  -1   4   13.99    0.76
  -6  -1   4   12.47    0.78
   5   1  -4   28.40    1.27
   5   1  -4   27.81    1.34
   5   1  -4   28.84    1.69
   5   1  -4   26.97    1.05
  -5  -1   4   28.52    1.07
  -5  -1   4   28.23    1.44
  -5  -1   4   29.21    1.18
  -5  -1   4   27.55    1.02
   4   1  -4   44.32    1.71
   4   1  -4   44.33    1.97
   4   1  -4   48.54    1.37
   4   1  -4   46.19    1.54
   4   1  -4   46.49    1.65
  -4  -1   4   46.25    1.74
  -4  -1   4   47.87    1.87
  -4  -1   4   48.69    1.39
  -4  -1   4   47.44    1.47
  -4  -1   4   47.64    1.34
   3   1  -4    4.19    0.42
   3   1  -4    4.74    0.58
   3   1  -4    4.46    0.63
  -3  -1   4    4.55    0.61
  -3  -1   4    4.82    0.46
  -3  -1   4    5.54    0.72
   2   1  -4   90.19    2.27
   2   1  -4   92.24    2.39
   2   1  -4   92.63    2.00
  -2  -1   4   91.84    2.50
  -2  -1   4   93.43    2.69
  -2  -1   4   92.83    2.03
  -2  -1   4   89.86    2.04
  -2  -1   4   89.01    2.31
   1   1  -4    1.58    0.28
   1   1  -4    2.09    0.38
   1   1  -4    1.66    0.43
   1   1  -4    1.70    0.24
   1   1  -4    1.61    0.29
  -1  -1   4    2.07    0.44
  -1  -1   4    1.69    0.26
  -1  -1   4    1.45    0.33
  -1  -1   4    1.26    0.40
  -1  -1   4    1.69    0.24
   0   1  -4   50.23    1.18
   0   1  -4   49.89    1.25
   0  -1   4   48.99    1.41
   0  -1   4   49.62    1.14
   0  -1   4   50.22    1.45
   0  -1   4   49.94    1.25
   0  -1   4   51.91    1.11
   1  -1   4   32.69    0.98
   1  -1   4   33.76    1.43
  -2   1  -4   64.92    2.43
   2  -1   4   69.01    2.25
  -3   1  -4    0.82    0.69
   3  -1   4    0.68    0.56
  -4   1  -4    2.03    0.83
   4  -1   4   -0.07    0.08
   4  -1   4    0.39    0.49
  -5   1  -4   20.62    1.85
   5  -1   4   21.81    0.91
   5  -1   4   21.72    1.34
   5  -1   4   22.22    1.24
  -6   1  -4    8.12    1.49
   6  -1   4    6.75    1.02
   6  -1   4    7.89    0.98
   6  -1   4    9.09    0.76
  -7   1  -4   12.32    1.89
   7  -1   4   11.87    1.21
   7  -1   4   13.77    1.44
   7  -1   4   13.92    1.00
  -8   1  -4    2.15    1.29
   8  -1   4    0.85    0.56
   8  -1   4    1.27    0.52
   8  -1   4    0.83    0.80
   9  -1   4    0.23    0.84
   9  -1   4    0.74    0.60
  10  -1   4    1.08    0.74
  11  -1   4   -0.45    0.70
  12   0  -4    0.73    1.26
  12   0  -4    0.47    0.98
  11   0  -4    0.46    0.87
  11   0  -4    0.78    1.20
  10   0  -4    0.62    0.99
  10   0  -4    1.68    0.90
  10   0  -4    1.27    0.81
   9   0  -4    6.13    1.36
   9   0  -4    3.55    0.87
   9   0  -4    2.65    0.90
   8   0  -4   -0.62    0.56
   8   0  -4    0.78    0.65
   8   0  -4    0.01    0.80
  -8   0   4    0.32    0.34
   7   0  -4    2.39    0.63
   7   0  -4    2.25    0.89
   7   0  -4   -0.52    0.48
  -7   0   4    1.49    0.48
  -7   0   4    1.16    0.41
  -7   0   4    0.67    0.41
   6   0  -4   25.73    1.43
   6   0  -4   22.80    1.36
   6   0  -4   25.23    1.69
   6   0  -4   24.99    1.31
  -6   0   4   26.02    1.17
  -6   0   4   25.81    1.57
  -6   0   4   22.98    1.02
  -6   0   4   23.45    1.01
   5   0  -4    2.86    0.55
   5   0  -4    3.32    0.63
   5   0  -4    3.51    0.80
  -5   0   4    3.43    0.45
  -5   0   4    2.79    0.72
  -5   0   4    3.21    0.45
  -5   0   4    2.74    0.51
   4   0  -4    0.15    0.34
   4   0  -4    0.16    0.48
   4   0  -4    0.32    0.36
   4   0  -4   -0.56    0.32
  -4   0   4    0.04    0.25
  -4   0   4   -0.20    0.41
  -4   0   4    0.08    0.24
  -4   0   4    0.07    0.31
  -4   0   4   -0.22    0.36
   3   0  -4   19.02    0.98
   3   0  -4   19.95    1.19
   3   0  -4   20.22    1.01
  -3   0   4   22.54    1.12
  -3   0   4   18.68    0.85
  -3   0   4   20.95    1.13
  -3   0   4   18.78    0.77
   2   0  -4   66.11    1.80
   2   0  -4   66.77    1.80
  -2   0   4   63.93    1.87
  -2   0   4   65.56    1.55
  -2   0   4   64.06    1.88
  -2   0   4   65.19    1.54
  -2   0   4   65.77    2.10
   1   0  -4   76.71    1.85
   1   0  -4   73.10    2.17
   1   0  -4   80.17    1.61
   1   0  -4   75.11    1.84
   1   0  -4   76.80    1.67
  -1   0   4   75.25    2.16
  -1   0   4   76.78    1.64
  -1   0   4   76.78    1.92
  -1   0   4   74.58    1.92
   0   0  -4   15.47    0.48
   0   0  -4   15.37    0.50
   0   0   4   14.65    0.59
   0   0   4   14.37    0.56
   1   0   4  695.92   14.92
  -2   0  -4    1.33    0.71
   2   0   4    0.96    0.55
  -3   0  -4   19.87    1.63
   3   0   4   20.31    1.52
   3   0   4   21.59    1.40
  -4   0  -4   90.13    3.41
   4   0   4   87.76    3.04
   4   0   4   83.99    3.04
  -5   0  -4   -0.02    0.76
   5   0   4    1.31    0.70
  -6   0  -4    4.83    1.25
   6   0   4    6.75    1.15
   6   0   4    8.12    0.85
  -7   0  -4   13.58    1.97
   7   0   4   11.03    1.45
   7   0   4   12.17    0.94
   7   0   4   14.86    1.16
  -8   0  -4    0.81    1.10
   8   0   4   -0.72    0.55
   8   0   4    0.91    0.52
   8   0   4    0.41    0.82
   8   0   4    0.28    0.50
   9   0   4    0.95    0.96
   9   0   4    1.69    0.70
  10   0   4    0.60    0.97
  10   0   4    0.43    0.68
  11   0   4    4.23    1.02
  11  -1  -4    0.54    0.82
  11  -1  -4    1.41    1.18
  10  -1  -4    2.23    1.14
  10  -1  -4    2.00    0.83
   9  -1  -4    4.16    0.94
   9  -1  -4    3.72    0.89
   9  -1  -4    3.93    1.20
   8  -1  -4    1.93    0.90
   8  -1  -4    1.34    0.65
   8  -1  -4    1.08    0.63
  -8   1   4    2.06    0.52
   7  -1  -4    8.62    1.01
   7  -1  -4    9.92    1.09
   7  -1  -4    9.64    1.33
  -7   1   4    9.44    0.88
  -7   1   4    7.58    0.69
  -7   1   4    9.09    0.78
   6  -1  -4   12.66    1.23
   6  -1  -4   11.49    1.05
   6  -1  -4   12.02    1.08
   6  -1  -4   12.64    1.39
  -6   1   4   11.36    0.77
  -6   1   4   11.05    1.27
  -6   1   4   12.41    0.77
  -6   1   4   11.43    0.88
   5  -1  -4    4.04    0.83
   5  -1  -4    2.51    0.62
   5  -1  -4    1.92    0.53
  -5   1   4    3.15    0.54
  -5   1   4    2.63    0.47
  -5   1   4    1.92    0.40
  -5   1   4    2.51    0.69
   4  -1  -4   11.49    0.87
   4  -1  -4   11.98    1.15
   4  -1  -4   11.29    0.82
   4  -1  -4   10.60    0.97
  -4   1   4   11.70    0.67
  -4   1   4    9.39    0.64
  -4   1   4   12.49    1.06
  -4   1   4   10.64    0.77
  -4   1   4   11.08    0.91
   3  -1  -4   80.04    2.32
   3  -1  -4   77.68    2.18
   3  -1  -4   75.98    2.48
  -3   1   4   80.71    2.47
  -3   1   4   76.78    2.25
  -3   1   4   78.36    2.07
  -3   1   4   77.75    1.89
   2  -1  -4   -0.03    0.18
   2  -1  -4    0.21    0.38
   2  -1  -4   -0.29    0.29
   2  -1  -4   -0.06    0.27
  -2   1   4   -0.37    0.21
  -2   1   4    0.15    0.37
  -2   1   4   -0.14    0.24
  -2   1   4   -0.16    0.28
   1  -1  -4   13.07    0.47
   1  -1  -4   12.85    0.54
   1  -1  -4   11.56    0.61
   1  -1  -4   13.11    0.68
  -1   1   4   12.02    0.66
  -1   1   4   12.38    0.81
  -1   1   4   13.32    0.79
  -1   1   4   12.39    0.51
   0  -1  -4  210.19    4.20
   0  -1  -4  209.56    4.16
   0   1   4  212.69    3.91
   0   1   4  202.32    4.32
   0   1   4  208.79    3.94
   0   1   4  208.83    4.25
   2   1   4    3.85    0.82
  -3  -1  -4  206.40    5.80
   3   1   4  196.35    5.83
   3   1   4  206.12    5.52
  -4  -1  -4   66.04    3.02
   4   1   4   69.19    2.75
   4   1   4   63.75    2.89
  -5  -1  -4    0.58    0.85
   5   1   4    0.74    0.63
   5   1   4    0.43    0.74
  -6  -1  -4   43.12    2.78
   6   1   4   42.13    2.38
   6   1   4   40.10    1.48
  -7  -1  -4   82.94    4.05
   7   1   4   76.87    2.35
   7   1   4   77.21    3.40
   7   1   4   78.76    2.41
  -8  -1  -4   12.39    2.07
   8   1   4   10.23    1.05
   8   1   4   12.66    1.74
   8   1   4   12.72    1.08
   9   1   4   -0.13    0.95
   9   1   4    0.13    0.58
  10   1   4   18.22    2.09
  10   1   4   19.02    1.47
  11   1   4    0.84    1.16
  11   1   4   -0.30    0.73
  11  -2  -4    3.78    1.08
  11  -2  -4    2.80    1.27
  10  -2  -4    1.48    0.86
  10  -2  -4   -0.06    0.97
   9  -2  -4    4.76    1.03
   9  -2  -4    5.49    1.03
   9  -2  -4    6.00    1.30
   8  -2  -4    0.22    0.61
   8  -2  -4   -0.04    0.62
   8  -2  -4    0.43    0.80
  -8   2   4    0.26    0.37
   7  -2  -4    5.25    1.08
   7  -2  -4    6.58    0.97
   7  -2  -4    6.47    0.97
  -7   2   4    7.59    0.81
  -7   2   4    6.43    0.66
  -7   2   4    7.75    0.77
   6  -2  -4    2.14    0.62
   6  -2  -4    2.20    0.64
   6  -2  -4    1.54    0.66
   6  -2  -4    2.30    0.59
   6  -2  -4    1.66    0.75
  -6   2   4    1.93    0.45
  -6   2   4    2.23    0.56
  -6   2   4    2.67    0.87
  -6   2   4    2.91    0.56
   5  -2  -4    8.94    1.05
   5  -2  -4    9.98    0.92
   5  -2  -4    9.20    0.89
   5  -2  -4   10.94    1.21
  -5   2   4    8.80    0.85
  -5   2   4    9.83    1.20
  -5   2   4    8.43    0.67
  -5   2   4    9.94    0.80
   4  -2  -4   38.64    1.79
   4  -2  -4   41.57    1.49
   4  -2  -4   42.26    1.78
   4  -2  -4   38.77    1.46
   4  -2  -4   42.99    1.60
  -4   2   4   43.14    1.38
  -4   2   4   41.76    1.50
  -4   2   4   44.71    2.01
  -4   2   4   44.52    1.70
  -4   2   4   42.03    1.31
   3  -2  -4    0.45    0.46
   3  -2  -4   -0.06    0.09
   3  -2  -4   -0.14    0.29
   3  -2  -4    0.21    0.32
  -3   2   4   -0.03    0.07
  -3   2   4    0.31    0.35
  -3   2   4    0.62    0.34
  -3   2   4   -0.05    0.50
   2  -2  -4    3.52    0.56
   2  -2  -4    3.12    0.45
   2  -2  -4    2.91    0.43
  -2   2   4    4.12    0.50
  -2   2   4    3.46    0.66
  -2   2   4    3.81    0.42
  -2   2   4    3.44    0.51
   1  -2  -4   72.22    1.98
   1  -2  -4   70.25    1.64
   1  -2  -4   68.03    1.79
  -1   2   4   74.08    1.67
  -1   2   4   71.85    1.75
  -1   2   4   69.72    2.11
  -1   2   4   70.59    1.86
   0  -2  -4    1.08    0.30
   0  -2  -4    1.55    0.26
   0   2   4    1.35    0.41
   0   2   4    1.52    0.30
   0   2   4    1.55    0.23
   1   2   4    2.55    0.27
   3   2   4  136.04    4.74
  -4  -2  -4   19.43    1.90
   4   2   4   17.66    2.00
  -5  -2  -4    8.09    1.46
   5   2   4    9.71    1.53
  -6  -2  -4   85.34    3.99
   6   2   4   83.87    3.71
  -7  -2  -4    7.63    1.74
   7   2   4   11.57    0.91
   7   2   4   12.21    1.78
   7   2   4   10.86    0.96
  -8  -2  -4    8.81    1.93
   8   2   4    8.89    0.99
   8   2   4   11.48    1.01
   8   2   4   11.55    1.79
   9   2   4    1.11    0.66
   9   2   4    0.41    1.05
  10   2   4    8.17    1.71
  10   2   4    8.29    1.11
  11   2   4    4.97    1.51
  11   2   4    0.07    0.75
  12   2   4   -0.73    1.23
  11  -3  -4    0.70    0.95
  10  -3  -4    4.51    1.07
   9  -3  -4   -0.12    0.69
   9  -3  -4    0.06    0.93
   8  -3  -4    4.05    0.88
   8  -3  -4    4.38    0.97
   8  -3  -4    4.13    1.13
  -8   3   4    3.92    0.54
  -8   3   4    4.42    0.66
   7  -3  -4    0.67    0.78
   7  -3  -4   -0.56    0.50
   7  -3  -4    0.28    0.63
  -7   3   4    0.66    0.48
  -7   3   4   -0.29    0.42
  -7   3   4    0.09    0.36
   6  -3  -4   40.22    1.77
   6  -3  -4   38.55    1.72
   6  -3  -4   40.14    1.86
  -6   3   4   40.40    1.56
  -6   3   4   38.90    1.41
  -6   3   4   41.37    1.64
   5  -3  -4   69.92    2.25
   5  -3  -4   74.32    2.24
   5  -3  -4   64.60    2.31
   5  -3  -4   72.48    2.68
  -5   3   4   67.99    2.07
  -5   3   4   69.42    2.89
  -5   3   4   68.05    1.95
  -5   3   4   74.76    2.26
   4  -3  -4   12.77    0.91
   4  -3  -4   12.49    0.92
   4  -3  -4   13.62    1.24
   4  -3  -4    8.84    0.80
  -4   3   4   12.94    1.40
  -4   3   4   13.37    0.92
  -4   3   4   12.64    0.83
  -4   3   4   11.69    0.73
   3  -3  -4    1.32    0.43
   3  -3  -4    0.84    0.30
   3  -3  -4    0.99    0.51
   3  -3  -4    1.17    0.41
  -3   3   4    0.13    0.37
  -3   3   4    0.31    0.22
  -3   3   4    1.01    0.39
  -3   3   4    1.51    0.69
   2  -3  -4   22.43    1.23
   2  -3  -4   23.16    0.95
   2  -3  -4   22.71    1.01
   2  -3  -4   21.20    0.96
  -2   3   4   21.71    0.92
  -2   3   4   22.90    1.07
  -2   3   4   21.81    1.40
  -2   3   4   22.52    1.04
   1  -3  -4   67.13    1.66
   1  -3  -4   66.51    1.82
   1  -3  -4   68.01    2.07
  -1   3   4   67.31    1.82
  -1   3   4   66.74    1.87
  -1   3   4   67.17    1.69
  -1   3   4   67.62    2.29
   0  -3  -4    0.76    0.27
   0  -3  -4    1.45    0.23
   0  -3  -4    1.48    0.21
   0  -3  -4    1.60    0.40
   0   3   4    2.29    0.56
   0   3   4    1.02    0.27
   0   3   4    0.90    0.30
  -1  -3  -4    2.37    0.36
  -1  -3  -4    2.33    0.28
   1   3   4    2.26    0.25
   1   3   4    2.41    0.33
   2   3   4   76.83    1.77
   3   3   4   28.01    1.94
   4   3   4    0.31    1.01
   4   3   4   -0.20    0.66
  -5  -3  -4   27.20    2.30
   5   3   4   22.25    2.33
   5   3   4   26.19    1.89
  -6  -3  -4   39.83    2.85
   6   3   4   31.94    1.19
   6   3   4   33.18    2.18
   6   3   4   36.63    2.69
  -7  -3  -4    6.40    1.67
   7   3   4   11.64    1.95
   7   3   4   10.64    0.86
   7   3   4   10.96    1.05
  -8  -3  -4    6.11    1.86
   8   3   4    7.62    0.82
   8   3   4    8.19    1.03
   8   3   4    9.05    1.82
   9   3   4   -0.48    1.07
   9   3   4    1.53    0.72
  10   3   4   -0.78    0.59
  10   3   4    1.48    1.32
  11   3   4    4.89    1.05
  11   3   4    6.37    1.86
  12   3   4    1.15    1.44
  10  -4  -4    0.65    0.88
   9  -4  -4    5.85    1.10
   8  -4  -4    0.87    0.74
  -8   4   4    0.23    0.38
   7  -4  -4    9.10    1.16
   7  -4  -4    9.37    1.08
  -7   4   4    9.95    0.99
  -7   4   4    8.84    0.80
  -7   4   4    7.69    0.92
   6  -4  -4    8.03    0.98
   6  -4  -4    9.60    1.10
  -6   4   4    6.63    0.72
  -6   4   4    7.94    0.88
  -6   4   4    6.39    0.83
   5  -4  -4   -0.47    0.43
   5  -4  -4   -0.32    0.48
   5  -4  -4    0.46    0.48
  -5   4   4   -0.52    0.33
  -5   4   4    0.07    0.74
  -5   4   4    0.91    0.48
  -5   4   4    0.10    0.44
   4  -4  -4   33.22    1.47
   4  -4  -4   34.02    1.82
   4  -4  -4   35.70    1.56
  -4   4   4   38.08    2.13
  -4   4   4   36.38    1.54
  -4   4   4   32.92    1.39
   3  -4  -4    3.21    0.53
   3  -4  -4    2.96    0.73
   3  -4  -4    2.03    0.48
   3  -4  -4    2.25    0.52
  -3   4   4    1.82    0.40
  -3   4   4    2.91    0.54
  -3   4   4    2.76    0.58
  -3   4   4    2.31    0.82
   2  -4  -4   36.20    1.68
   2  -4  -4   36.28    1.34
   2  -4  -4   38.22    1.29
   2  -4  -4   39.64    1.42
  -2   4   4   36.84    1.91
  -2   4   4   36.34    1.43
  -2   4   4   36.44    1.40
  -2   4   4   37.91    1.32
   1  -4  -4   36.29    1.23
   1  -4  -4   37.16    1.31
   1  -4  -4   38.46    1.62
   1  -4  -4   36.76    1.17
  -1   4   4   36.72    1.33
  -1   4   4   38.13    1.37
  -1   4   4   32.88    1.74
  -1   4   4   36.60    1.24
   0  -4  -4    0.12    0.16
   0  -4  -4    0.42    0.28
   0   4   4   -0.11    0.29
   0   4   4   -0.04    0.26
   0   4   4   -0.19    0.37
  -1  -4  -4    5.42    0.47
   1   4   4    5.98    0.53
   1   4   4    6.07    0.82
   1   4   4    5.36    0.46
   2   4   4   62.99    1.46
   2   4   4   62.55    2.13
   2   4   4   61.01    1.64
   3   4   4   24.30    1.32
   3   4   4   25.51    0.90
   3   4   4   25.32    1.96
   4   4   4   64.66    3.63
   4   4   4   64.72    3.04
   4   4   4   64.81    1.69
   5   4   4   46.28    2.55
   5   4   4   42.68    1.35
   5   4   4   43.33    3.02
   6   4   4    0.24    0.76
   6   4   4    0.12    0.33
   6   4   4   -0.52    0.48
   6   4   4    1.69    1.22
  -7  -4  -4   22.17    2.66
   7   4   4   21.68    1.10
   7   4   4   24.69    2.73
   7   4   4   23.59    1.55
  -8  -4  -4   18.79    2.68
   8   4   4   19.98    2.56
   8   4   4   18.69    1.16
   8   4   4   20.25    1.51
   9   4   4    3.26    0.87
   9   4   4    2.51    1.39
  10   4   4    0.73    1.34
  10   4   4   -0.31    0.66
  11   4   4    3.14    1.01
  11   4   4    2.69    1.64
  12   4   4   11.90    2.34
  10  -5  -4    1.97    1.04
   9  -5  -4    0.60    0.82
   8  -5  -4    7.30    1.17
   7  -5  -4   15.22    1.41
  -7   5   4   18.36    1.22
  -7   5   4   19.76    1.27
  -7   5   4   17.62    1.03
   6  -5  -4    5.65    0.94
   6  -5  -4    4.76    0.85
  -6   5   4    6.06    0.84
  -6   5   4    6.06    0.71
  -6   5   4    5.04    0.81
   5  -5  -4   24.31    1.48
   5  -5  -4   25.08    1.42
   5  -5  -4   25.73    1.49
  -5   5   4   23.61    1.39
  -5   5   4   24.24    1.15
  -5   5   4   24.75    1.37
   4  -5  -4   67.64    2.18
   4  -5  -4   70.96    2.32
   4  -5  -4   69.48    2.36
  -4   5   4   67.07    2.28
  -4   5   4   67.62    3.13
  -4   5   4   69.35    2.21
   3  -5  -4    2.62    0.58
   3  -5  -4    2.50    0.52
   3  -5  -4    2.35    0.56
  -3   5   4    1.79    0.85
  -3   5   4    1.68    0.53
   2  -5  -4   19.83    1.07
   2  -5  -4   17.55    1.01
   2  -5  -4   19.11    0.99
  -2   5   4   18.01    0.99
  -2   5   4   19.00    1.10
  -2   5   4   19.46    1.61
  -2   5   4   16.33    1.02
   1  -5  -4   24.04    1.10
   1  -5  -4   25.21    1.03
   1  -5  -4   24.87    1.08
  -1   5   4   25.50    1.16
  -1   5   4   23.91    1.16
  -1   5   4   24.86    1.11
   0  -5  -4    3.28    0.40
   0  -5  -4    2.20    0.41
   0  -5  -4    3.12    0.47
   0   5   4    1.82    0.75
   0   5   4    3.15    0.49
   0   5   4    3.56    0.50
  -1  -5  -4    0.87    0.31
   1   5   4    0.90    0.33
   1   5   4   -0.10    0.58
   1   5   4    0.89    0.36
  -2  -5  -4    8.75    0.56
   2   5   4   11.43    1.21
   2   5   4    9.22    0.65
   2   5   4    8.82    0.60
   3   5   4    4.84    0.89
   3   5   4    5.86    0.55
   3   5   4    5.99    0.51
   4   5   4   58.69    1.73
   4   5   4   61.16    3.10
   4   5   4   62.26    1.57
   5   5   4    0.14    0.32
   5   5   4    0.61    0.29
   5   5   4   -1.00    0.62
   5   5   4   -0.07    0.81
   6   5   4    4.45    0.58
   6   5   4    6.12    0.58
   6   5   4    5.95    1.01
   6   5   4    6.23    1.29
   6   5   4    6.20    1.76
   7   5   4    1.80    0.50
   7   5   4    0.65    0.73
   7   5   4    2.92    1.47
   8   5   4   87.15    2.62
   8   5   4   90.04    2.61
   8   5   4   90.62    3.29
   8   5   4   86.59    4.62
   9   5   4    2.16    1.49
   9   5   4    2.47    0.91
  10   5   4    9.46    1.33
  10   5   4    9.02    2.14
  11   5   4   21.02    2.86
  11   5   4   16.19    1.74
  12   5   4    0.48    1.60
   9  -6  -4    0.81    0.88
   8  -6  -4   11.41    1.36
   7  -6  -4    8.04    1.11
  -7   6   4    7.05    0.75
  -7   6   4    7.51    0.97
   6  -6  -4    1.54    0.69
  -6   6   4    0.31    0.46
  -6   6   4   -0.03    0.56
   5  -6  -4   39.43    1.80
   5  -6  -4   41.38    1.97
  -5   6   4   40.84    1.56
  -5   6   4   39.40    1.82
   4  -6  -4   18.97    1.33
   4  -6  -4   23.27    1.27
  -4   6   4   19.11    1.30
   3  -6  -4    3.75    0.70
   3  -6  -4    3.38    0.64
   3  -6  -4    2.37    0.67
  -3   6   4    3.15    0.66
  -3   6   4    2.05    1.03
  -3   6   4    2.29    0.58
   2  -6  -4    7.14    0.79
   2  -6  -4    7.69    0.77
   2  -6  -4    8.03    0.86
  -2   6   4    6.97    0.81
  -2   6   4    5.11    1.14
  -2   6   4    7.74    0.84
   1  -6  -4   12.23    0.90
   1  -6  -4   10.08    0.87
   1  -6  -4    9.81    0.76
  -1   6   4    9.61    0.89
  -1   6   4   10.16    0.93
  -1   6   4   10.35    0.90
   0  -6  -4    0.68    0.37
   0  -6  -4    0.89    0.32
   0  -6  -4    0.15    0.34
   0   6   4    0.23    0.41
   0   6   4    0.53    0.38
   0   6   4   -0.55    0.64
  -1  -6  -4    3.87    0.45
  -1  -6  -4    3.70    0.38
  -1  -6  -4    4.04    0.54
   1   6   4    4.81    1.03
   1   6   4    3.18    0.54
   1   6   4    3.37    0.55
  -2  -6  -4   19.54    0.88
   2   6   4   17.60    0.95
   2   6   4   17.27    0.94
   2   6   4   20.01    1.62
  -3  -6  -4    8.76    0.62
   3   6   4    8.78    0.72
   3   6   4    8.07    1.89
   3   6   4    8.66    0.71
   4   6   4   29.35    1.16
   4   6   4   26.77    2.24
   4   6   4   28.76    3.07
   4   6   4   29.46    1.20
   5   6   4   14.88    0.90
   5   6   4   15.29    1.92
   5   6   4   14.93    0.91
   6   6   4    0.56    0.92
   6   6   4    0.23    1.17
   6   6   4    0.82    0.40
   6   6   4    0.82    0.46
   7   6   4   21.96    1.19
   7   6   4   23.63    2.99
   7   6   4   21.24    1.90
   7   6   4   21.73    1.20
   8   6   4    1.13    1.44
   8   6   4    0.23    0.54
   8   6   4   -0.11    0.79
   9   6   4    3.43    1.72
   9   6   4    3.75    1.10
  10   6   4   19.65    1.88
  10   6   4   16.76    2.69
  11   6   4   -0.35    0.89
  11   6   4    4.45    1.87
  12   6   4    1.43    1.77
   9  -7  -4    1.46    0.94
   8  -7  -4    3.69    1.06
   7  -7  -4    5.10    1.02
  -7   7   4    3.53    0.64
  -7   7   4    4.82    0.90
   6  -7  -4    8.07    1.07
  -6   7   4    7.10    1.02
  -6   7   4    6.34    0.79
   5  -7  -4   16.46    1.28
  -5   7   4   13.93    1.30
   4  -7  -4    6.04    0.88
   4  -7  -4    8.18    1.05
  -4   7   4    9.29    1.09
   3  -7  -4    1.52    0.59
   3  -7  -4    1.48    0.65
   3  -7  -4    0.72    0.56
  -3   7   4    0.98    0.61
  -3   7   4    1.98    1.14
   2  -7  -4   12.18    1.09
   2  -7  -4   12.49    1.11
   2  -7  -4   13.87    1.01
  -2   7   4   11.32    1.06
  -2   7   4    5.15    1.25
   1  -7  -4    2.44    0.64
   1  -7  -4    2.02    0.50
   1  -7  -4    1.20    0.48
  -1   7   4    1.21    0.54
  -1   7   4    0.80    0.48
  -1   7   4    0.58    0.87
   0  -7  -4    0.00    0.38
   0  -7  -4    0.09    0.40
   0  -7  -4    0.78    0.37
   0   7   4    1.50    0.97
   0   7   4    0.20    0.47
   0   7   4   -0.06    0.40
  -1  -7  -4   16.82    0.86
  -1  -7  -4   14.59    0.73
  -1  -7  -4   17.70    1.00
   1   7   4   15.58    1.07
   1   7   4   15.22    1.73
   1   7   4   17.06    1.05
  -2  -7  -4   -0.16    0.33
   2   7   4   -0.57    0.39
   2   7   4    0.53    0.37
  -3  -7  -4   10.35    0.74
   3   7   4   11.32    0.92
   3   7   4   10.91    0.83
   3   7   4   10.53    2.17
   4   7   4    4.67    0.71
   4   7   4    6.88    1.45
   4   7   4    5.45    0.66
   4   7   4    4.25    1.80
   5   7   4    5.59    1.81
   5   7   4    5.87    0.77
   5   7   4    6.39    0.74
   5   7   4    7.26    1.58
   6   7   4    1.46    0.52
   6   7   4    2.76    1.54
   6   7   4    1.46    0.55
   7   7   4    3.26    1.57
   7   7   4    3.17    1.13
   7   7   4    0.95    0.59
   8   7   4    4.18    0.83
   8   7   4    3.49    1.10
   8   7   4    4.17    1.72
   9   7   4    8.35    2.23
   9   7   4    9.66    1.54
  10   7   4    7.33    2.06
  10   7   4    5.40    1.27
  11   7   4    1.97    1.13
  11   7   4    1.45    1.62
   8  -8  -4    1.23    0.91
   7  -8  -4    6.64    1.18
  -7   8   4    6.24    0.78
   6  -8  -4   13.01    1.39
  -6   8   4   13.83    1.08
  -6   8   4   13.61    1.34
   5  -8  -4    5.11    0.96
  -5   8   4    4.13    0.94
   4  -8  -4    0.26    0.57
   4  -8  -4    0.08    0.62
  -4   8   4    0.20    0.66
   3  -8  -4   43.20    1.85
   3  -8  -4   42.56    1.98
  -3   8   4   41.21    2.02
   2  -8  -4   -0.30    0.48
   2  -8  -4    1.23    0.63
  -2   8   4    0.61    0.71
  -2   8   4    0.35    0.57
   1  -8  -4    0.21    0.45
   1  -8  -4    0.00    0.51
  -1   8   4   -0.76    0.96
  -1   8   4    0.06    0.57
   0  -8  -4    7.62    0.89
   0  -8  -4    8.79    0.79
   0   8   4    7.62    1.56
   0   8   4    8.64    1.02
  -1  -8  -4    2.11    0.51
  -1  -8  -4    2.37    0.46
   1   8   4    2.12    0.67
   2   8   4    5.56    0.86
   3   8   4   -0.04    1.40
   3   8   4    2.62    0.70
   4   8   4   10.95    2.36
   4   8   4    9.84    1.02
   4   8   4    7.52    1.70
   5   8   4    5.65    2.07
   5   8   4    6.60    0.89
   6   8   4   -1.25    1.29
   6   8   4    2.88    0.72
   7   8   4    6.34    0.97
   7   8   4    8.16    2.14
   7   8   4    5.25    1.44
   8   8   4   -0.95    0.98
   8   8   4    0.79    1.46
   8   8   4    0.66    0.68
   9   8   4   10.53    2.48
   9   8   4   14.72    1.95
   9   8   4   11.10    1.46
  10   8   4    1.13    1.08
  10   8   4   -2.05    1.50
  11   8   4   -0.28    1.63
  11   8   4   -0.06    1.03
   7  -9  -4   10.51    1.36
  -7   9   4   10.25    0.93
   6  -9  -4    3.33    0.96
  -6   9   4    3.59    1.03
  -6   9   4    3.42    0.69
   5  -9  -4    4.90    0.96
  -5   9   4    4.09    1.01
   4  -9  -4   19.58    1.51
  -4   9   4   17.22    1.59
   3  -9  -4   19.97    1.55
   3  -9  -4   21.88    1.44
  -3   9   4   20.87    1.67
   2  -9  -4    6.79    0.88
   2  -9  -4    7.04    1.04
  -2   9   4    6.64    1.06
   1  -9  -4    2.44    0.62
   1  -9  -4    3.06    0.79
  -1   9   4    3.12    0.81
   0  -9  -4   17.80    1.24
   0  -9  -4   16.34    1.06
   0   9   4   16.04    1.46
  -1  -9  -4   11.10    0.95
  -1  -9  -4   10.66    0.81
   1   9   4   13.42    1.27
   2   9   4    2.52    0.80
   2   9   4    1.71    1.70
   3   9   4   45.24    3.98
   3   9   4   38.26    1.88
   4   9   4    0.70    1.63
   4   9   4    1.37    0.75
   5   9   4    0.58    0.65
   5   9   4    2.45    1.72
   6   9   4    0.39    0.66
   6   9   4    1.77    1.63
   7   9   4   23.83    3.39
   7   9   4   27.25    2.73
   7   9   4   24.78    1.71
   8   9   4    0.24    0.73
   8   9   4    0.69    1.20
   8   9   4    0.11    1.53
   9   9   4    0.80    1.22
   9   9   4    3.17    1.83
   9   9   4    1.96    0.96
  10   9   4    1.42    1.96
  10   9   4   -0.87    1.17
   6 -10  -4    0.26    0.84
  -6  10   4    0.94    0.59
   5 -10  -4   -0.61    0.73
  -5  10   4   -0.59    0.82
   4 -10  -4    7.77    1.11
  -4  10   4    7.40    1.24
   3 -10  -4    2.15    0.76
   3 -10  -4    0.61    0.74
  -3  10   4    1.46    0.87
   2 -10  -4    0.50    0.73
   2 -10  -4   -0.42    0.55
  -2  10   4    0.09    0.77
   1 -10  -4   20.95    1.32
   1 -10  -4   23.46    1.57
  -1  10   4   20.53    1.69
   0 -10  -4    5.40    0.73
   0 -10  -4    4.63    0.86
   0  10   4    2.52    0.92
  -1 -10  -4    0.84    0.46
  -1 -10  -4    1.44    0.59
   1  10   4    0.07    0.70
   2  10   4   17.74    2.95
   2  10   4   15.54    1.52
   3  10   4   38.31    2.05
   3  10   4   36.61    4.11
   4  10   4    2.20    0.86
   4  10   4    3.21    2.14
   5  10   4    0.26    0.76
   5  10   4    0.33    1.66
   6  10   4   17.21    2.30
   6  10   4   16.33    1.60
   6  10   4   18.07    3.03
   7  10   4   16.08    2.32
   7  10   4   20.30    3.31
   7  10   4   18.61    1.70
   8  10   4   -1.11    1.12
   8  10   4    0.01    0.85
   8  10   4   -0.09    1.48
   9  10   4    2.80    1.11
   9  10   4    3.50    1.95
   9  10   4    1.72    1.39
  10  10   4    2.52    1.46
  10  10   4   -1.40    1.71
   5 -11  -4    0.03    0.82
  -5  11   4   -0.61    0.90
  -5  11   4   -0.51    0.54
   4 -11  -4   -0.44    0.75
  -4  11   4   -0.10    0.90
   3 -11  -4    1.61    0.95
   3 -11  -4    1.96    0.85
  -3  11   4    1.16    1.01
   2 -11  -4    8.37    1.21
   2 -11  -4    5.59    0.94
  -2  11   4    5.63    1.18
   1 -11  -4   15.55    1.48
   1 -11  -4   16.21    1.32
  -1  11   4   14.68    1.68
   0 -11  -4    3.98    0.87
   0 -11  -4    2.40    0.66
   0  11   4    2.21    1.00
  -1 -11  -4    2.13    0.70
  -1 -11  -4    3.65    0.65
   1  11   4    1.91    0.95
   1  11   4    0.40    1.84
   2  11   4   23.28    1.99
   2  11   4   17.06    3.13
   3  11   4    0.88    1.86
   3  11   4    1.64    0.89
   4  11   4    4.84    2.22
   4  11   4    1.62    0.97
   5  11   4   15.62    1.70
   5  11   4   11.92    2.83
   6  11   4    1.57    1.01
   6  11   4    2.97    1.53
   6  11   4    1.11    1.83
   7  11   4    0.73    1.83
   7  11   4    0.24    0.97
   7  11   4    2.29    1.44
   8  11   4    5.55    2.36
   8  11   4    5.26    1.79
   8  11   4    7.18    1.41
   9  11   4    0.92    1.52
   9  11   4    1.80    1.18
   9  11   4    2.64    2.02
  10  11   4    0.64    1.13
   3 -12  -4    2.15    0.88
  -3  12   4    1.53    1.07
   2 -12  -4    7.90    1.10
   2 -12  -4    8.86    1.37
  -2  12   4    9.30    1.52
   1 -12  -4    1.38    0.91
   1 -12  -4   -0.13    0.61
  -1  12   4    0.67    1.01
   0 -12  -4    5.33    0.85
   0 -12  -4    4.98    1.04
   0  12   4    2.93    1.09
  -1 -12  -4    3.21    0.67
  -1 -12  -4    3.34    0.84
   1  12   4    1.64    2.20
   1  12   4    1.40    0.97
   2  12   4    2.73    2.29
   2  12   4    2.64    1.07
   3  12   4    2.88    2.06
   3  12   4   -0.03    0.91
   4  12   4    3.50    2.25
   4  12   4    7.31    1.37
   5  12   4    9.78    2.67
   5  12   4   15.31    1.80
   6  12   4    0.04    1.46
   6  12   4    0.75    1.06
   6  12   4    0.71    1.91
   7  12   4    1.92    1.13
   7  12   4    6.72    2.46
   7  12   4    1.30    1.64
   8  12   4    6.76    2.41
   8  12   4    4.25    1.82
   8  12   4    6.51    1.49
   9  12   4   -0.07    1.02
   9  12   4    3.26    1.88
   1 -13  -4    0.65    0.72
   1 -13  -4    0.98    0.98
  -1  13   4    2.44    1.18
   0 -13  -4    2.06    1.00
   0  13   4    0.25    1.09
  -1 -13  -4    3.65    0.91
   1  13   4    4.69    1.32
   2  13   4    0.65    1.05
   3  13   4   -0.27    2.09
   3  13   4   -0.08    1.05
   4  13   4   41.82    2.73
   4  13   4   35.98    4.43
   5  13   4    2.00    1.23
   5  13   4    2.53    2.10
   6  13   4    2.71    1.26
   6  13   4    0.90    1.97
   7  13   4   19.99    2.21
   7  13   4   18.72    3.61
   3  14   4    5.32    1.59
   6  13  -5    0.21    1.12
  -6 -13   5   -0.02    0.67
  -6 -13   5    0.55    0.96
   5  13  -5    8.61    1.61
  -5 -13   5    8.68    1.10
  -5 -13   5    5.03    1.25
   4  13  -5    1.61    1.12
  -4 -13   5    2.87    0.88
  -4 -13   5    4.02    1.22
   3  13  -5    1.17    1.04
  -3 -13   5    1.10    0.83
   2  13  -5   12.22    1.59
  -2 -13   5   11.54    1.34
   1  13  -5    0.80    0.95
  -1 -13   5    3.85    0.99
   0 -13   5    1.29    0.87
   8  12  -5    2.73    1.65
   8  12  -5   -0.72    1.02
   7  12  -5   -0.10    1.21
   7  12  -5   -0.64    1.03
  -7 -12   5    0.35    0.85
   6  12  -5    3.47    1.25
   6  12  -5    0.47    1.28
  -6 -12   5    3.67    1.02
  -6 -12   5    2.87    0.77
   5  12  -5    3.58    1.17
  -5 -12   5    2.19    0.97
  -5 -12   5    3.43    0.84
   4  12  -5    0.69    0.95
  -4 -12   5   -0.55    0.80
  -4 -12   5    0.31    0.65
   3  12  -5    0.64    0.98
  -3 -12   5    0.77    0.76
   2  12  -5    2.00    1.00
  -2 -12   5    1.31    0.79
   1  12  -5    1.10    0.90
  -1 -12   5   -0.60    0.70
   0  12  -5    1.02    0.84
   0 -12   5    1.25    0.76
   1 -12   5    9.05    1.28
   2 -12   5    0.13    0.84
   3 -12   5   -0.24    0.98
   9  11  -5   -0.12    1.37
   9  11  -5    0.90    1.09
   8  11  -5    4.07    1.62
   8  11  -5    3.36    1.24
  -8 -11   5    3.11    0.86
   7  11  -5    1.23    1.32
   7  11  -5    4.91    1.28
  -7 -11   5    0.58    0.59
  -7 -11   5    1.47    0.81
   6  11  -5    3.12    1.36
   6  11  -5    1.91    1.05
  -6 -11   5    2.74    0.72
  -6 -11   5    2.73    0.92
   5  11  -5    0.94    0.98
   5  11  -5   -0.77    1.02
  -5 -11   5    1.37    0.68
  -5 -11   5    1.33    0.80
   4  11  -5    3.27    1.26
   4  11  -5    1.79    0.99
  -4 -11   5    2.35    0.71
  -4 -11   5    2.84    0.96
   3  11  -5    4.00    1.04
  -3 -11   5    1.42    0.69
   2  11  -5   -1.37    0.73
  -2 -11   5    0.36    0.68
   1  11  -5    0.47    0.77
  -1 -11   5   -0.25    0.60
   0  11  -5   10.45    1.22
   0 -11   5   10.85    1.20
  -1  11  -5    6.88    0.78
   1 -11   5    7.75    1.16
   2 -11   5    0.97    0.84
   3 -11   5   -0.05    0.86
   4 -11   5    5.03    1.19
  10  10  -5   -0.86    1.38
  10  10  -5    2.71    1.24
   9  10  -5    0.61    1.02
   9  10  -5    1.36    1.44
   8  10  -5   13.32    2.24
   8  10  -5   12.65    1.63
  -8 -10   5    9.35    1.09
   7  10  -5    7.60    1.36
   7  10  -5    8.16    1.80
  -7 -10   5    7.45    1.06
  -7 -10   5    9.34    0.90
   6  10  -5    6.45    1.23
   6  10  -5    4.28    1.45
  -6 -10   5    4.31    0.72
  -6 -10   5    4.65    0.96
   5  10  -5    4.62    1.38
   5  10  -5    5.25    1.12
  -5 -10   5    8.09    0.95
  -5 -10   5    6.66    1.10
   4  10  -5    7.97    1.27
   4  10  -5    6.91    1.42
  -4 -10   5   10.29    1.25
  -4 -10   5    9.33    1.00
   3  10  -5    2.10    0.96
   3  10  -5    0.54    0.76
  -3 -10   5    1.17    0.59
  -3 -10   5    2.09    0.84
   2  10  -5    2.75    0.87
  -2 -10   5    1.51    0.63
   1  10  -5   -0.38    0.66
  -1 -10   5    0.13    0.57
   0  10  -5   16.49    1.42
   0 -10   5   14.86    1.33
  -1  10  -5    1.48    0.53
  -1  10  -5    0.06    0.60
   1 -10   5    0.19    0.64
   2 -10   5    5.90    1.00
   3 -10   5    2.68    0.96
   4 -10   5    1.57    0.93
   5 -10   5    1.62    0.99
   6 -10   5    3.45    1.19
  11   9  -5    4.91    1.44
  10   9  -5    1.60    1.19
  10   9  -5    0.95    1.42
   9   9  -5   12.47    2.23
   9   9  -5   13.01    1.72
   8   9  -5    6.22    1.67
   8   9  -5    4.95    1.23
  -8  -9   5    3.66    0.77
  -8  -9   5    3.83    0.70
  -8  -9   5    3.38    0.58
   7   9  -5    0.70    1.21
   7   9  -5    1.96    0.88
  -7  -9   5    0.17    0.67
  -7  -9   5    1.78    0.56
   6   9  -5   48.88    2.39
   6   9  -5   48.26    3.02
  -6  -9   5   47.30    1.74
  -6  -9   5   44.89    2.08
   5   9  -5   17.91    1.63
   5   9  -5   22.08    2.28
  -5  -9   5   17.91    1.16
  -5  -9   5   18.12    1.47
   4   9  -5   -0.74    0.73
   4   9  -5    0.17    0.67
  -4  -9   5   -0.09    0.67
  -4  -9   5   -0.38    0.44
   3   9  -5   11.81    1.34
   3   9  -5   16.86    1.74
  -3  -9   5   14.18    1.08
  -3  -9   5   10.95    1.29
   2   9  -5   10.31    1.18
   2   9  -5   11.60    1.36
  -2  -9   5   12.75    1.02
  -2  -9   5    7.75    1.09
   1   9  -5    1.53    0.72
   1   9  -5    0.80    0.69
  -1  -9   5    2.40    0.76
  -1  -9   5    1.16    0.56
   0   9  -5    6.00    0.94
   0   9  -5    4.53    0.66
   0  -9   5    7.75    0.98
   0  -9   5    4.95    0.91
  -1   9  -5    9.97    1.00
  -1   9  -5   10.85    0.86
   1  -9   5    9.69    1.21
   1  -9   5   10.62    1.13
   2  -9   5   10.72    1.19
   2  -9   5   11.44    1.28
   3  -9   5    6.68    1.13
   3  -9   5    6.77    1.06
   4  -9   5    4.35    1.06
   4  -9   5    3.56    1.05
   5  -9   5    0.48    0.90
   5  -9   5    1.50    0.91
   6  -9   5   11.48    1.46
   7  -9   5    0.27    0.88
  11   8  -5    1.53    1.14
  10   8  -5   10.44    2.01
  10   8  -5   11.38    1.60
   9   8  -5    3.88    1.18
   9   8  -5    2.81    1.40
   8   8  -5    3.16    1.38
   8   8  -5    6.16    1.23
  -8  -8   5    3.21    0.57
  -8  -8   5    2.90    0.64
  -8  -8   5    3.50    0.78
   7   8  -5    2.82    1.27
   7   8  -5    5.62    1.09
  -7  -8   5    4.65    0.67
  -7  -8   5    5.57    0.92
   6   8  -5   30.63    1.85
   6   8  -5   31.71    2.44
  -6  -8   5   34.83    1.73
  -6  -8   5   34.36    1.41
   5   8  -5    2.25    1.04
   5   8  -5    0.81    0.94
   5   8  -5    2.33    0.81
  -5  -8   5    2.64    0.75
  -5  -8   5    3.25    0.60
   4   8  -5    3.98    1.13
   4   8  -5    4.60    1.18
   4   8  -5    2.05    0.76
  -4  -8   5    3.99    0.64
  -4  -8   5    3.21    0.73
   3   8  -5   28.17    1.92
   3   8  -5   26.90    2.17
   3   8  -5   27.48    1.61
  -3  -8   5   26.11    1.55
  -3  -8   5   28.59    1.32
  -3  -8   5   24.65    1.50
   2   8  -5    2.99    0.61
   2   8  -5    1.45    0.68
   2   8  -5    3.79    0.93
  -2  -8   5    2.76    0.70
  -2  -8   5    2.61    0.72
  -2  -8   5    1.65    0.54
   1   8  -5   -0.07    0.52
   1   8  -5   -0.03    0.40
   1   8  -5   -0.78    0.49
  -1  -8   5   -0.07    0.45
  -1  -8   5    0.18    0.53
  -1  -8   5   -0.13    0.56
   0   8  -5   50.50    1.95
   0   8  -5   51.64    1.70
   0  -8   5   51.33    1.91
   0  -8   5   50.64    2.14
  -1   8  -5    0.63    0.54
  -1   8  -5    0.86    0.41
   1  -8   5    0.30    0.61
   1  -8   5   -0.55    0.48
   2  -8   5    3.54    0.78
   2  -8   5    3.29    0.78
   3  -8   5    0.25    0.66
   3  -8   5    0.93    0.74
   4  -8   5   -0.49    0.61
   4  -8   5    0.90    0.75
   5  -8   5    3.64    0.91
   5  -8   5    3.37    0.98
   6  -8   5    2.23    0.88
   6  -8   5    2.69    0.94
   7  -8   5    0.15    0.89
   7  -8   5    0.34    0.88
   8  -8   5    1.70    1.03
  11   7  -5   -0.10    0.98
  11   7  -5    1.26    1.34
  10   7  -5    6.17    1.28
  10   7  -5    2.09    1.32
   9   7  -5    1.77    1.27
   9   7  -5    2.58    1.00
   8   7  -5   -0.59    0.95
   8   7  -5    0.94    0.88
   8   7  -5   -0.03    0.95
  -8  -7   5   -0.17    0.40
  -8  -7   5    0.62    0.55
  -8  -7   5    0.17    0.47
   7   7  -5   13.23    1.44
   7   7  -5   10.99    1.80
   7   7  -5    9.48    1.46
  -7  -7   5   13.55    1.17
  -7  -7   5   13.83    0.92
   6   7  -5   10.92    1.71
   6   7  -5   11.01    1.27
   6   7  -5   10.94    1.56
  -6  -7   5   12.32    1.12
  -6  -7   5    9.75    0.84
   5   7  -5    0.72    0.57
   5   7  -5    0.28    0.58
   5   7  -5    1.15    0.88
  -5  -7   5    0.74    0.43
  -5  -7   5    0.03    0.51
   4   7  -5   12.20    1.18
   4   7  -5   15.63    1.68
   4   7  -5   12.47    1.51
  -4  -7   5   15.43    1.17
  -4  -7   5   15.57    1.20
  -4  -7   5   12.90    0.91
   3   7  -5    9.47    1.07
   3   7  -5    9.13    0.84
   3   7  -5   10.50    1.34
   3   7  -5   11.83    1.53
  -3  -7   5    8.40    0.92
  -3  -7   5    9.50    0.82
  -3  -7   5   11.18    1.06
   2   7  -5    7.62    1.23
   2   7  -5    6.24    0.98
   2   7  -5    5.66    0.65
   2   7  -5    4.06    0.77
  -2  -7   5    6.28    0.69
  -2  -7   5    6.08    0.83
   1   7  -5   10.18    0.98
   1   7  -5    9.56    1.31
   1   7  -5   11.15    0.82
  -1  -7   5   10.25    0.91
  -1  -7   5    9.19    0.96
  -1  -7   5   12.29    1.13
   0   7  -5   11.30    0.84
   0   7  -5   10.65    0.95
   0   7  -5   13.38    0.83
   0   7  -5   11.98    1.45
   0  -7   5   13.59    1.00
   0  -7   5   11.36    1.08
   0  -7   5   10.69    1.05
  -1   7  -5    1.33    0.38
  -1   7  -5    1.59    0.53
  -1   7  -5    0.91    0.54
   1  -7   5    2.02    0.60
   1  -7   5    1.83    0.57
  -2   7  -5    0.86    0.69
   2  -7   5    1.31    0.61
   2  -7   5    1.28    0.62
  -3   7  -5   12.56    1.44
   3  -7   5   16.81    1.21
   3  -7   5   16.95    1.33
  -4   7  -5   -0.67    0.82
   4  -7   5    0.16    0.59
   4  -7   5    0.52    0.62
  -5   7  -5   -1.62    0.90
   5  -7   5    0.42    0.67
   5  -7   5    0.13    0.65
   6  -7   5    7.08    1.06
   6  -7   5    6.94    1.14
   7  -7   5    1.49    0.87
   7  -7   5    1.22    0.85
   8  -7   5    1.12    0.94
   8  -7   5   -0.53    0.77
  12   6  -5    0.59    0.99
  11   6  -5    7.75    1.54
  11   6  -5    6.60    1.71
  11   6  -5    6.02    1.33
  10   6  -5    0.80    0.96
  10   6  -5    1.21    1.12
   9   6  -5    0.71    0.89
   9   6  -5    0.21    0.79
   9   6  -5    0.20    0.97
   8   6  -5   26.61    2.36
   8   6  -5   25.32    2.03
   8   6  -5   22.23    1.71
  -8  -6   5   23.74    1.30
  -8  -6   5   23.67    1.08
  -8  -6   5   25.45    1.26
  -8  -6   5   24.54    2.39
   7   6  -5    2.16    0.80
   7   6  -5    1.34    0.90
   7   6  -5    3.34    1.26
  -7  -6   5    2.69    0.60
  -7  -6   5    2.80    0.66
  -7  -6   5    2.38    1.11
  -7  -6   5    2.38    0.52
   6   6  -5    1.19    0.84
   6   6  -5    1.13    0.64
   6   6  -5    1.09    0.91
  -6  -6   5    1.12    0.88
  -6  -6   5    1.09    0.41
  -6  -6   5    0.89    0.56
   5   6  -5   84.52    2.76
   5   6  -5   90.70    3.60
   5   6  -5   85.72    2.71
  -5  -6   5   83.45    3.07
  -5  -6   5   84.05    2.31
  -5  -6   5   90.46    2.63
  -5  -6   5   86.76    2.84
   4   6  -5    3.62    0.55
   4   6  -5    5.46    1.08
   4   6  -5    4.96    0.99
  -4  -6   5    4.08    0.74
  -4  -6   5    4.89    0.61
  -4  -6   5    3.55    0.64
   3   6  -5   20.82    1.23
   3   6  -5   21.17    1.52
   3   6  -5   19.50    0.98
   3   6  -5   19.92    1.63
  -3  -6   5   19.59    1.20
  -3  -6   5   19.61    1.16
   2   6  -5   -0.66    0.55
   2   6  -5    0.45    0.56
   2   6  -5   -0.32    0.29
   2   6  -5    0.03    0.42
  -2  -6   5   -0.24    0.41
  -2  -6   5   -0.06    0.35
  -2  -6   5    0.08    0.31
   1   6  -5   17.42    1.51
   1   6  -5   20.87    0.93
   1   6  -5   20.14    1.11
  -1  -6   5   19.52    1.14
  -1  -6   5   17.85    1.77
  -1  -6   5   20.20    1.04
  -1  -6   5   19.45    1.16
   0   6  -5    0.34    0.39
   0   6  -5    0.19    0.40
   0   6  -5   -0.23    0.60
   0   6  -5    0.80    0.32
   0  -6   5    0.13    0.44
   0  -6   5    0.26    0.40
   0  -6   5    0.39    0.39
  -1   6  -5   -0.49    0.55
  -1   6  -5   -0.15    0.44
   1  -6   5    0.06    0.40
   1  -6   5    0.29    0.44
   1  -6   5    0.11    0.42
  -2   6  -5   16.64    1.31
  -2   6  -5   17.58    1.44
   2  -6   5   18.25    1.19
   2  -6   5   17.87    1.08
  -3   6  -5    3.39    0.95
   3  -6   5    5.59    0.77
   3  -6   5    4.86    0.78
  -4   6  -5   -0.59    0.83
   4  -6   5    0.07    0.52
   4  -6   5    0.29    0.56
  -5   6  -5    1.97    1.10
   5  -6   5    1.65    0.66
   5  -6   5    1.96    0.72
  -6   6  -5   10.66    1.86
   6  -6   5    8.47    1.05
   6  -6   5    9.01    1.13
   7  -6   5    0.01    0.70
   7  -6   5    1.68    0.76
   8  -6   5    2.42    0.93
   8  -6   5    2.10    0.89
   9  -6   5    3.73    1.07
   9  -6   5    1.36    0.92
  12   5  -5    1.49    1.01
  11   5  -5    2.33    1.37
  11   5  -5    0.99    0.93
  10   5  -5    6.74    1.71
  10   5  -5    5.12    1.19
  10   5  -5    4.88    1.15
   9   5  -5   14.72    1.69
   9   5  -5   13.88    1.49
   9   5  -5   17.21    2.17
  -9  -5   5   16.34    2.14
   8   5  -5   22.93    2.38
   8   5  -5   20.30    1.59
   8   5  -5   25.41    1.89
  -8  -5   5   20.91    1.02
  -8  -5   5   22.82    1.21
  -8  -5   5   21.37    2.20
  -8  -5   5   19.62    1.19
   7   5  -5   13.71    1.79
   7   5  -5   10.99    1.24
   7   5  -5   10.43    1.37
  -7  -5   5   14.17    1.70
  -7  -5   5   11.23    0.83
  -7  -5   5   13.04    1.04
  -7  -5   5   12.61    1.03
   6   5  -5   34.20    2.27
   6   5  -5   33.64    1.73
   6   5  -5   37.01    2.13
  -6  -5   5   33.26    2.07
  -6  -5   5   32.50    1.46
  -6  -5   5   35.55    1.29
  -6  -5   5   35.68    1.77
   5   5  -5   92.07    2.81
   5   5  -5   92.39    3.62
   5   5  -5  100.39    2.57
  -5  -5   5   93.57    2.94
  -5  -5   5   92.41    2.41
  -5  -5   5   98.93    3.26
  -5  -5   5   95.44    2.65
   4   5  -5    4.09    0.62
   4   5  -5    2.70    0.86
   4   5  -5    3.71    0.53
   4   5  -5    4.38    0.89
  -4  -5   5    4.08    0.52
  -4  -5   5    3.60    0.73
  -4  -5   5    3.58    0.66
  -4  -5   5    4.87    0.67
   3   5  -5    8.43    0.66
   3   5  -5    7.62    0.81
   3   5  -5    8.77    1.13
   3   5  -5    7.82    1.08
   3   5  -5    7.66    0.75
  -3  -5   5    9.69    0.88
  -3  -5   5    7.41    1.22
  -3  -5   5    8.01    0.77
   2   5  -5    7.01    0.75
   2   5  -5    6.62    0.99
   2   5  -5    6.75    0.60
   2   5  -5    6.56    0.91
  -2  -5   5    6.79    1.11
  -2  -5   5    6.14    0.60
  -2  -5   5    6.91    0.73
  -2  -5   5    5.88    0.69
   1   5  -5   23.64    1.19
   1   5  -5   23.20    1.51
   1   5  -5   24.79    1.10
   1   5  -5   25.12    0.94
  -1  -5   5   25.07    1.12
  -1  -5   5   25.03    1.59
  -1  -5   5   23.15    1.15
  -1  -5   5   24.38    1.03
   0   5  -5   -0.09    0.22
   0   5  -5   -0.32    0.31
   0   5  -5    0.09    0.50
   0   5  -5    0.26    0.33
   0  -5   5   -0.66    0.32
   0  -5   5    0.26    0.32
   0  -5   5   -0.33    0.55
   0  -5   5    0.42    0.35
  -1   5  -5   55.01    2.17
  -1   5  -5   58.36    1.93
   1  -5   5   57.60    1.86
   1  -5   5   53.34    1.75
   1  -5   5   56.80    1.73
  -2   5  -5   39.48    1.78
  -2   5  -5   42.51    1.85
   2  -5   5   36.96    1.45
   2  -5   5   37.77    1.49
   2  -5   5   38.59    1.39
  -3   5  -5    6.29    1.07
   3  -5   5    6.13    1.18
   3  -5   5    6.37    0.69
   3  -5   5    6.13    0.74
  -4   5  -5    3.69    0.99
   4  -5   5    2.95    1.02
   4  -5   5    3.90    0.64
   4  -5   5    4.56    0.77
  -5   5  -5   16.39    1.92
   5  -5   5   16.40    1.13
   5  -5   5   14.44    1.17
  -6   5  -5    2.57    1.35
   6  -5   5    2.22    0.69
   6  -5   5    1.71    0.69
   7  -5   5    0.87    0.65
   7  -5   5    0.54    0.63
   8  -5   5    0.94    0.70
   8  -5   5   -0.01    0.70
   9  -5   5    1.58    0.93
   9  -5   5    1.99    0.89
  12   4  -5   -0.27    0.92
  12   4  -5    0.14    1.46
  11   4  -5    0.19    1.21
  11   4  -5    0.35    0.86
  10   4  -5    1.06    0.80
  10   4  -5    0.33    1.09
   9   4  -5    5.99    1.12
   9   4  -5    6.23    1.13
   9   4  -5    3.69    1.31
   9   4  -5    6.41    1.20
  -9  -4   5    5.54    1.54
   8   4  -5    0.02    0.69
   8   4  -5    0.43    0.79
   8   4  -5    0.68    0.70
  -8  -4   5    0.51    0.96
  -8  -4   5    0.00    0.37
  -8  -4   5    0.71    0.48
  -8  -4   5    0.17    0.46
   7   4  -5    4.39    0.96
   7   4  -5    4.62    1.12
   7   4  -5    3.30    0.81
  -7  -4   5    3.48    0.61
  -7  -4   5    3.63    1.06
  -7  -4   5    4.40    0.68
  -7  -4   5    4.35    0.56
   6   4  -5    3.24    0.98
   6   4  -5    3.73    0.68
   6   4  -5    4.09    0.77
   6   4  -5    4.55    0.95
  -6  -4   5    4.93    0.82
  -6  -4   5    4.43    0.56
  -6  -4   5    4.22    0.98
  -6  -4   5    4.92    0.68
  -6  -4   5    4.95    0.65
   5   4  -5   15.72    1.04
   5   4  -5   16.15    0.89
   5   4  -5   15.27    1.29
   5   4  -5   16.06    1.63
  -5  -4   5   16.45    1.16
  -5  -4   5   14.68    0.95
  -5  -4   5   15.68    0.83
  -5  -4   5   18.29    1.37
   4   4  -5   24.23    1.63
   4   4  -5   29.35    1.11
   4   4  -5   29.76    1.65
   4   4  -5   25.92    1.23
  -4  -4   5   28.55    1.07
  -4  -4   5   27.29    1.80
  -4  -4   5   27.52    1.36
  -4  -4   5   26.31    1.40
  -4  -4   5   28.03    1.20
   3   4  -5    3.26    0.46
   3   4  -5    4.57    0.84
   3   4  -5    4.39    0.78
   3   4  -5    3.57    0.53
   3   4  -5    4.13    0.59
  -3  -4   5    3.93    0.59
  -3  -4   5    3.56    0.51
  -3  -4   5    3.91    0.57
  -3  -4   5    4.06    0.82
  -3  -4   5    4.10    0.48
   2   4  -5   65.67    1.96
   2   4  -5   69.57    1.77
   2   4  -5   70.28    2.37
   2   4  -5   66.45    1.96
   2   4  -5   73.30    2.45
  -2  -4   5   66.68    2.05
  -2  -4   5   71.29    1.93
  -2  -4   5   67.04    1.80
  -2  -4   5   65.97    2.66
   1   4  -5    2.25    0.51
   1   4  -5    2.32    0.34
   1   4  -5    1.04    0.53
   1   4  -5    2.42    0.45
  -1  -4   5    1.99    0.40
  -1  -4   5    1.29    0.70
  -1  -4   5    2.22    0.66
  -1  -4   5    1.87    0.39
   0   4  -5    3.44    0.46
   0   4  -5    2.84    0.31
   0   4  -5    2.55    0.62
   0  -4   5    3.54    0.61
   0  -4   5    2.94    0.50
   0  -4   5    3.08    0.45
   0  -4   5    2.31    0.82
   0  -4   5    2.35    0.41
  -1   4  -5  193.98    4.78
  -1   4  -5  203.27    4.77
   1  -4   5  201.46    4.46
   1  -4   5  193.22    4.20
   1  -4   5  201.25    4.17
  -2   4  -5   44.90    1.94
  -2   4  -5   45.89    1.68
   2  -4   5   43.69    1.36
   2  -4   5   47.02    1.55
  -3   4  -5    7.28    1.10
   3  -4   5    9.12    0.78
   3  -4   5    8.07    0.69
  -4   4  -5   66.07    2.96
   4  -4   5   65.59    2.81
   4  -4   5   67.37    1.91
   4  -4   5   68.48    2.11
  -5   4  -5    7.42    1.45
   5  -4   5    7.97    0.83
   5  -4   5    8.54    0.79
   5  -4   5    8.14    1.28
  -6   4  -5    1.60    1.20
   6  -4   5    4.18    0.69
   6  -4   5    3.84    0.71
  -7   4  -5   -0.50    1.16
   7  -4   5    0.70    0.60
   7  -4   5    0.55    0.57
   8  -4   5   16.25    1.32
   8  -4   5   17.64    1.41
   9  -4   5    0.24    0.72
  10  -4   5    0.91    0.83
  12   3  -5    2.16    1.05
  12   3  -5   -2.06    1.09
  11   3  -5    1.25    0.97
  11   3  -5    3.88    1.48
  10   3  -5    1.60    1.17
  10   3  -5    0.10    0.89
  10   3  -5    0.51    0.74
   9   3  -5    1.83    0.75
   9   3  -5    0.62    0.74
   9   3  -5   -0.09    0.96
  -9  -3   5    0.23    1.05
   8   3  -5    5.15    1.03
   8   3  -5    5.82    0.97
   8   3  -5    5.77    1.32
  -8  -3   5    4.73    0.66
  -8  -3   5    3.39    1.15
  -8  -3   5    4.97    0.61
  -8  -3   5    4.34    0.68
   7   3  -5    2.37    0.70
   7   3  -5    0.99    0.70
   7   3  -5    1.38    0.66
   7   3  -5    1.09    0.83
  -7  -3   5    1.76    0.55
  -7  -3   5    1.15    0.43
  -7  -3   5    1.38    0.86
  -7  -3   5    1.04    0.49
   6   3  -5    3.43    0.70
   6   3  -5    3.23    0.65
   6   3  -5    3.61    0.79
  -6  -3   5    3.63    0.90
  -6  -3   5    4.37    0.64
  -6  -3   5    3.85    0.59
  -6  -3   5    5.57    0.83
  -6  -3   5    4.65    0.56
   5   3  -5   12.54    0.78
   5   3  -5   14.04    1.01
   5   3  -5   15.03    1.36
   5   3  -5   12.29    0.95
   5   3  -5   13.28    1.21
  -5  -3   5   12.16    1.03
  -5  -3   5   12.08    0.72
  -5  -3   5   11.61    0.82
   4   3  -5   26.20    1.60
   4   3  -5   26.30    1.49
   4   3  -5   26.02    1.22
   4   3  -5   29.18    1.07
  -4  -3   5   25.96    1.30
  -4  -3   5   26.53    1.65
  -4  -3   5   26.48    1.00
  -4  -3   5   26.69    1.08
   3   3  -5   39.78    1.78
   3   3  -5   35.03    1.34
   3   3  -5   37.91    1.20
   3   3  -5   35.86    1.36
   3   3  -5   37.15    1.65
  -3  -3   5   38.31    1.27
  -3  -3   5   37.74    1.47
  -3  -3   5   35.77    1.17
  -3  -3   5   38.89    1.86
   2   3  -5    0.54    0.47
   2   3  -5    0.12    0.24
   2   3  -5    0.52    0.48
   2   3  -5    0.62    0.32
   2   3  -5    0.63    0.35
  -2  -3   5    0.61    0.57
  -2  -3   5    0.64    0.35
  -2  -3   5    0.45    0.28
  -2  -3   5    0.49    0.29
   1   3  -5    2.04    0.49
   1   3  -5    0.24    0.21
   1   3  -5    1.61    0.51
   1   3  -5    1.60    0.28
   1   3  -5    1.42    0.34
  -1  -3   5    0.93    0.32
  -1  -3   5    1.05    0.30
  -1  -3   5    2.06    0.56
  -1  -3   5    1.48    0.61
  -1  -3   5    1.38    0.32
   0   3  -5   10.72    0.83
   0   3  -5   10.95    0.69
   0  -3   5   11.38    0.77
   0  -3   5   10.49    0.68
   0  -3   5    8.10    0.97
   0  -3   5   10.43    0.60
   0  -3   5   10.45    0.58
  -1   3  -5   55.86    1.97
  -1   3  -5   54.88    1.65
   1  -3   5   52.83    2.09
   1  -3   5   54.87    1.56
   1  -3   5   54.63    1.41
  -2   3  -5   -0.45    0.53
   2  -3   5   -0.18    0.25
   2  -3   5    0.07    0.29
  -3   3  -5   29.83    1.78
   3  -3   5   29.15    0.95
   3  -3   5   28.09    1.10
  -4   3  -5   70.14    3.04
   4  -3   5   73.90    1.84
   4  -3   5   72.83    2.04
   4  -3   5   74.34    2.70
  -5   3  -5    2.44    1.05
   5  -3   5    1.17    0.41
   5  -3   5    2.07    0.49
   5  -3   5    2.07    0.85
  -6   3  -5    6.34    1.48
   6  -3   5    3.60    0.99
   6  -3   5    5.31    0.65
   6  -3   5    4.66    0.69
   6  -3   5    5.40    0.63
  -7   3  -5   45.43    3.22
   7  -3   5   46.34    1.84
   7  -3   5   47.17    1.70
   8  -3   5    1.17    0.65
   8  -3   5    2.55    0.72
   9  -3   5    7.71    1.05
  10  -3   5    4.50    1.02
  12   2  -5    4.17    1.26
  12   2  -5    5.21    1.56
  11   2  -5    7.99    1.81
  11   2  -5    3.00    1.05
  10   2  -5    0.99    0.79
  10   2  -5   -0.74    0.94
   9   2  -5   15.24    1.51
   9   2  -5   15.92    2.06
   9   2  -5   15.03    1.56
   8   2  -5    9.51    1.56
   8   2  -5    6.99    1.14
   8   2  -5    8.28    1.04
  -8  -2   5    9.74    1.57
  -8  -2   5    8.20    0.84
  -8  -2   5    7.98    0.73
  -8  -2   5    8.35    0.78
   7   2  -5    8.25    1.00
   7   2  -5    7.90    1.33
   7   2  -5    8.27    1.05
  -7  -2   5    9.78    0.84
  -7  -2   5    8.23    0.72
  -7  -2   5    9.29    0.89
   6   2  -5   -0.14    0.38
   6   2  -5    0.38    0.47
   6   2  -5   -0.19    0.45
   6   2  -5    0.61    0.51
  -6  -2   5    0.10    0.33
  -6  -2   5    0.15    0.45
  -6  -2   5   -0.50    0.32
  -6  -2   5    0.11    0.37
   5   2  -5    1.27    0.54
   5   2  -5    0.89    0.47
   5   2  -5    1.77    0.40
   5   2  -5    0.70    0.50
  -5  -2   5    2.08    0.47
  -5  -2   5    1.28    0.38
  -5  -2   5    2.15    0.48
  -5  -2   5    0.74    0.51
   4   2  -5    5.27    0.77
   4   2  -5    5.41    0.66
   4   2  -5    5.34    0.52
   4   2  -5    4.40    0.85
  -4  -2   5    5.33    0.52
  -4  -2   5    5.29    0.82
  -4  -2   5    5.70    0.55
  -4  -2   5    5.59    0.74
   3   2  -5   13.61    0.65
   3   2  -5   11.12    0.93
   3   2  -5   11.38    0.79
   3   2  -5   12.64    0.80
   3   2  -5   12.41    1.08
  -3  -2   5   12.76    0.89
  -3  -2   5   12.44    0.67
  -3  -2   5   12.59    0.70
  -3  -2   5   12.42    1.11
   2   2  -5   -0.51    0.34
   2   2  -5    0.12    0.22
   2   2  -5    0.07    0.29
   2   2  -5    0.50    0.41
   2   2  -5    0.29    0.30
  -2  -2   5    0.05    0.34
  -2  -2   5   -0.61    0.40
  -2  -2   5   -0.34    0.21
  -2  -2   5   -0.20    0.24
   1   2  -5    3.92    0.53
   1   2  -5    2.83    0.34
   1   2  -5    2.72    0.37
   1   2  -5    2.89    0.31
   1   2  -5    3.47    0.55
  -1  -2   5    2.73    0.42
  -1  -2   5    2.66    0.57
  -1  -2   5    2.70    0.33
  -1  -2   5    2.57    0.34
  -1  -2   5    1.86    0.51
   0   2  -5   12.19    0.56
   0   2  -5   12.75    0.70
   0  -2   5   12.06    0.54
   0  -2   5   12.42    0.51
   0  -2   5   12.44    0.88
   0  -2   5   12.75    0.73
   0  -2   5   14.00    0.95
   1  -2   5    0.03    0.43
   1  -2   5    0.37    0.24
   1  -2   5    0.01    0.43
   1  -2   5    0.33    0.24
  -2   2  -5   -0.60    0.58
   2  -2   5    0.27    0.47
   2  -2   5    0.00    0.23
  -3   2  -5   96.33    3.33
   3  -2   5   94.43    2.20
   3  -2   5   90.54    2.54
  -4   2  -5    8.02    1.26
   4  -2   5    6.53    0.55
   4  -2   5    7.73    0.75
  -5   2  -5    3.79    1.09
   5  -2   5    1.92    0.72
   5  -2   5    1.47    0.51
   5  -2   5    2.80    0.44
  -6   2  -5   51.04    3.06
   6  -2   5   51.79    1.71
   6  -2   5   49.25    2.17
   6  -2   5   49.71    1.95
  -7   2  -5    2.30    1.23
   7  -2   5    0.30    0.72
   7  -2   5    0.41    0.60
   7  -2   5    0.71    0.47
   7  -2   5    1.10    0.52
   8  -2   5    2.45    0.64
   9  -2   5    6.59    0.98
  10  -2   5    1.30    0.76
  12   1  -5    1.24    1.32
  12   1  -5   -0.67    0.83
  11   1  -5    3.66    1.46
  11   1  -5    3.91    1.11
  10   1  -5    2.34    0.90
  10   1  -5    1.26    1.10
   9   1  -5    4.94    0.98
   9   1  -5    3.23    1.17
   9   1  -5    4.89    1.04
   8   1  -5   35.69    1.82
   8   1  -5   34.53    2.33
   8   1  -5   37.61    2.01
  -8  -1   5   34.19    1.37
  -8  -1   5   34.37    1.46
  -8  -1   5   34.27    1.33
   7   1  -5    2.03    0.68
   7   1  -5    1.79    0.83
   7   1  -5    1.46    0.68
  -7  -1   5    5.03    0.68
  -7  -1   5    2.18    0.49
  -7  -1   5    2.67    0.51
   6   1  -5    2.74    0.62
   6   1  -5    3.67    0.71
   6   1  -5    4.76    1.01
   6   1  -5    3.02    0.70
  -6  -1   5    4.87    0.66
  -6  -1   5    2.95    0.52
  -6  -1   5    3.28    0.75
  -6  -1   5    5.17    0.58
   5   1  -5    2.38    0.76
   5   1  -5    1.97    0.55
   5   1  -5    1.59    0.54
   5   1  -5    2.32    0.57
  -5  -1   5    2.13    0.45
  -5  -1   5    2.61    0.44
  -5  -1   5    1.12    0.55
  -5  -1   5    2.51    0.51
   4   1  -5   85.80    2.56
   4   1  -5   83.46    2.46
  -4  -1   5   82.53    2.22
  -4  -1   5   87.02    2.61
  -4  -1   5   86.92    2.74
  -4  -1   5   86.14    2.09
  -4  -1   5   82.49    2.12
   3   1  -5    4.43    0.76
   3   1  -5    5.24    0.56
   3   1  -5    4.94    0.60
   3   1  -5    5.85    0.68
  -3  -1   5    5.39    0.66
  -3  -1   5    5.68    0.75
  -3  -1   5    5.12    0.48
  -3  -1   5    5.30    0.48
   2   1  -5    6.30    0.58
   2   1  -5    6.67    0.79
   2   1  -5    6.03    0.61
  -2  -1   5    5.53    0.45
  -2  -1   5    5.96    0.62
  -2  -1   5    5.36    0.68
  -2  -1   5    6.51    0.48
   1   1  -5   57.61    1.87
   1   1  -5   58.94    1.64
   1   1  -5   63.00    1.40
   1   1  -5   61.22    1.55
  -1  -1   5   58.18    1.64
  -1  -1   5   61.76    1.82
  -1  -1   5   60.05    1.41
  -1  -1   5   59.13    1.39
  -1  -1   5   60.12    1.90
   0   1  -5    7.25    0.38
   0   1  -5    6.45    0.42
   0  -1   5    6.13    0.56
   0  -1   5    7.13    0.41
   0  -1   5    7.59    0.37
   0  -1   5    6.96    0.58
   1  -1   5    0.81    0.58
   1  -1   5    0.86    0.29
  -2   1  -5   87.98    3.04
   2  -1   5   82.02    2.76
  -3   1  -5   61.14    2.68
   3  -1   5   62.66    2.39
   3  -1   5   61.95    2.38
  -4   1  -5   -0.39    0.71
   4  -1   5    0.25    0.56
  -5   1  -5   22.20    2.01
   5  -1   5   22.23    1.43
   5  -1   5   21.62    1.25
  -6   1  -5   88.62    4.06
   6  -1   5   96.50    3.21
   6  -1   5   91.01    2.41
   6  -1   5   94.45    2.86
  -7   1  -5    4.71    1.50
   7  -1   5    4.65    0.87
   7  -1   5    4.69    0.97
   7  -1   5    5.64    0.71
   8  -1   5    2.43    0.82
   8  -1   5    4.37    1.00
   8  -1   5    3.75    0.71
   9  -1   5   12.93    1.18
  10  -1   5    0.95    0.74
  11  -1   5    5.76    1.03
  12   0  -5    5.28    1.22
  12   0  -5    4.74    1.57
  11   0  -5   -0.48    0.81
  11   0  -5   -1.46    0.97
  10   0  -5    6.55    1.17
  10   0  -5    6.84    1.60
   9   0  -5   14.86    1.52
   9   0  -5   14.65    1.54
   9   0  -5   14.63    1.88
   8   0  -5    0.80    0.85
   8   0  -5   -0.23    0.55
   8   0  -5    0.97    0.67
  -8   0   5   -0.33    0.46
  -8   0   5    0.42    0.42
  -8   0   5    0.17    0.42
   7   0  -5   10.59    1.07
   7   0  -5   12.86    1.58
   7   0  -5   14.46    1.33
  -7   0   5   13.26    0.89
  -7   0   5   12.13    0.97
  -7   0   5   12.45    0.86
   6   0  -5   14.05    1.15
   6   0  -5   13.01    1.05
   6   0  -5   13.52    1.22
   6   0  -5   11.60    1.39
  -6   0   5   14.72    0.99
  -6   0   5   12.32    1.31
  -6   0   5   11.56    0.80
  -6   0   5   13.57    0.83
   5   0  -5    6.83    0.77
   5   0  -5    6.22    0.79
   5   0  -5    6.13    0.81
   5   0  -5    5.04    0.92
  -5   0   5    5.18    0.85
  -5   0   5    6.55    0.64
  -5   0   5    6.12    0.70
  -5   0   5    5.72    0.60
   4   0  -5   66.77    2.51
   4   0  -5   70.75    2.19
   4   0  -5   71.33    2.22
  -4   0   5   67.82    1.95
  -4   0   5   69.80    1.82
  -4   0   5   67.86    1.83
  -4   0   5   68.66    2.31
  -4   0   5   69.11    2.35
   3   0  -5   30.55    1.25
   3   0  -5   29.50    1.23
   3   0  -5   27.84    1.09
   3   0  -5   29.05    1.43
  -3   0   5   28.08    0.99
  -3   0   5   29.17    1.34
  -3   0   5   28.99    1.00
  -3   0   5   30.45    1.38
   2   0  -5    8.31    0.65
   2   0  -5    8.72    0.68
  -2   0   5    8.31    0.50
  -2   0   5    8.77    0.75
  -2   0   5    8.62    0.75
  -2   0   5    7.94    0.52
   1   0  -5    0.91    0.23
   1   0  -5    0.24    0.24
   1   0  -5    0.30    0.25
   1   0  -5    0.41    0.17
  -1   0   5    0.77    0.32
  -1   0   5    0.16    0.30
  -1   0   5    0.64    0.22
  -1   0   5    0.77    0.40
   0   0   5    2.88    0.35
   2   0   5  191.20    5.15
  -3   0  -5    7.76    1.26
   3   0   5    9.00    1.12
   3   0   5    7.55    1.22
  -4   0  -5    4.46    1.12
   4   0   5    3.96    0.96
   4   0   5    4.41    0.85
  -5   0  -5   27.56    2.25
   5   0   5   32.45    1.90
  -6   0  -5   19.84    2.18
   6   0   5   18.89    1.63
  -7   0  -5   -1.14    1.00
   7   0   5    0.42    0.38
   7   0   5    0.77    0.61
   7   0   5    1.64    0.94
  -8   0  -5    4.00    1.59
   8   0   5    3.49    0.67
   8   0   5    4.29    1.07
   8   0   5    3.93    0.82
   9   0   5   14.68    1.74
   9   0   5   14.63    1.25
  10   0   5    4.17    0.85
  11   0   5    2.13    0.85
  11  -1  -5    1.15    0.93
  11  -1  -5    0.52    1.18
  10  -1  -5    2.62    1.19
  10  -1  -5    1.75    0.92
   9  -1  -5    5.28    1.08
   9  -1  -5    5.44    0.98
   9  -1  -5    8.25    1.48
   8  -1  -5    6.79    1.33
   8  -1  -5    7.40    1.08
   8  -1  -5    9.72    1.22
  -8   1   5    7.04    0.77
  -8   1   5    6.25    0.79
  -8   1   5    8.55    0.77
   7  -1  -5    6.78    0.95
   7  -1  -5    8.54    1.03
   7  -1  -5    9.45    1.37
  -7   1   5    8.63    0.90
  -7   1   5    8.58    0.80
  -7   1   5    7.55    0.76
   6  -1  -5   11.99    1.41
   6  -1  -5   11.10    1.15
   6  -1  -5    9.60    0.98
   6  -1  -5   12.38    1.15
  -6   1   5   10.22    0.80
  -6   1   5   11.28    1.34
  -6   1   5   11.34    0.92
  -6   1   5    9.77    0.77
   5  -1  -5    3.64    0.69
   5  -1  -5    2.35    0.56
   5  -1  -5    2.49    0.74
  -5   1   5    2.65    0.55
  -5   1   5    3.14    0.80
  -5   1   5    3.35    0.50
  -5   1   5    2.88    0.49
   4  -1  -5   90.62    2.61
   4  -1  -5   91.92    3.01
   4  -1  -5   88.86    2.72
  -4   1   5   93.47    2.46
  -4   1   5   88.10    2.91
  -4   1   5   90.78    2.75
  -4   1   5   88.19    2.25
  -4   1   5   91.16    2.25
   3  -1  -5   27.57    1.07
   3  -1  -5   26.83    1.23
   3  -1  -5   27.30    1.17
   3  -1  -5   25.86    1.39
  -3   1   5   27.25    1.25
  -3   1   5   24.65    1.34
  -3   1   5   26.53    1.07
  -3   1   5   25.84    0.94
  -3   1   5   25.92    0.96
   2  -1  -5    5.52    0.60
   2  -1  -5    6.54    0.58
   2  -1  -5    5.69    0.51
  -2   1   5    7.79    0.78
  -2   1   5    6.07    0.48
  -2   1   5    5.71    0.52
  -2   1   5    5.37    0.62
   1  -1  -5   14.24    0.50
   1  -1  -5   15.68    0.73
   1  -1  -5   14.61    0.68
   1  -1  -5   13.32    0.55
  -1   1   5   13.70    0.82
  -1   1   5   14.09    0.74
  -1   1   5   14.64    0.59
   0  -1  -5   10.63    0.45
   0  -1  -5   11.87    0.49
   0   1   5   11.71    0.57
   2   1   5    3.13    0.84
   3   1   5   70.97    2.85
  -4  -1  -5    1.68    0.92
   4   1   5   -0.28    0.74
   4   1   5   -0.61    0.53
  -5  -1  -5   44.78    2.81
   5   1   5   42.62    2.29
   5   1   5   41.85    2.46
  -6  -1  -5   15.97    2.06
   6   1   5   14.67    1.79
  -7  -1  -5    1.30    1.27
   7   1   5    1.65    0.53
   7   1   5    1.83    1.04
  -8  -1  -5    1.61    1.37
   8   1   5    4.72    1.31
   8   1   5    4.42    0.75
   8   1   5    4.19    0.69
   9   1   5    3.17    0.74
   9   1   5    2.59    1.21
  10   1   5   13.28    1.26
  10   1   5   13.64    1.96
  11   1   5   19.91    1.71
  11  -2  -5    2.04    1.31
  11  -2  -5    0.58    0.92
  10  -2  -5    5.54    1.16
  10  -2  -5    5.55    1.44
   9  -2  -5    1.27    0.79
   9  -2  -5   -0.83    0.86
   8  -2  -5   13.22    1.29
   8  -2  -5   16.74    1.86
   8  -2  -5   17.64    1.53
  -8   2   5   14.56    0.96
  -8   2   5   13.79    1.06
  -8   2   5   16.73    1.08
   7  -2  -5   24.99    1.84
   7  -2  -5   23.41    1.53
   7  -2  -5   22.58    1.45
  -7   2   5   23.11    1.13
  -7   2   5   22.25    1.32
  -7   2   5   24.39    1.25
   6  -2  -5    4.50    0.98
   6  -2  -5    2.79    0.68
   6  -2  -5    2.13    0.63
  -6   2   5    3.64    0.60
  -6   2   5    1.84    0.53
  -6   2   5    2.78    0.53
  -6   2   5    2.22    0.90
   5  -2  -5   48.60    1.85
   5  -2  -5   49.14    2.22
   5  -2  -5   44.69    1.98
  -5   2   5   43.99    1.49
  -5   2   5   46.68    2.27
  -5   2   5   44.00    1.54
  -5   2   5   48.62    1.74
   4  -2  -5   31.22    1.39
   4  -2  -5   31.69    1.53
   4  -2  -5   30.03    1.65
  -4   2   5   29.81    1.13
  -4   2   5   31.20    1.32
  -4   2   5   29.27    1.44
  -4   2   5   32.02    1.76
  -4   2   5   30.28    1.17
   3  -2  -5    5.39    0.58
   3  -2  -5    4.32    0.60
   3  -2  -5    5.17    0.71
  -3   2   5    5.24    0.53
  -3   2   5    5.37    0.68
  -3   2   5    5.67    0.88
  -3   2   5    5.32    0.63
   2  -2  -5   51.13    1.75
   2  -2  -5   52.84    1.47
   2  -2  -5   53.17    1.61
  -2   2   5   53.04    1.70
  -2   2   5   53.08    1.46
  -2   2   5   49.42    1.92
  -2   2   5   53.46    1.58
   1  -2  -5    3.60    0.36
   1  -2  -5    3.81    0.34
   1  -2  -5    3.37    0.43
   1  -2  -5    3.87    0.52
  -1   2   5    3.26    0.56
  -1   2   5    3.09    0.43
  -1   2   5    4.00    0.40
   0  -2  -5   12.62    0.61
   0  -2  -5   11.84    0.54
   0   2   5   12.51    0.49
   0   2   5   12.05    0.62
   3   2   5   38.88    2.23
   4   2   5   -0.03    1.02
   4   2   5    2.46    0.85
  -5  -2  -5    6.78    1.51
   5   2   5    6.04    1.36
   5   2   5    6.87    1.18
  -6  -2  -5   13.04    2.03
   6   2   5   15.92    2.02
  -7  -2  -5    5.05    1.61
   7   2   5    2.95    1.23
  -8  -2  -5    0.69    1.24
   8   2   5   -0.17    1.03
   8   2   5    0.42    0.50
   8   2   5    0.11    0.49
   9   2   5    1.77    0.71
   9   2   5    2.63    1.26
   9   2   5    1.20    0.66
  10   2   5    4.44    1.48
  10   2   5    5.18    0.93
  11   2   5   18.42    2.38
  11   2   5   23.62    1.73
  11  -3  -5    8.49    1.42
  10  -3  -5    0.90    0.85
   9  -3  -5    2.49    0.87
   8  -3  -5    3.25    0.86
  -8   3   5    1.07    0.56
  -8   3   5    2.23    0.60
  -8   3   5    1.82    0.52
   7  -3  -5   21.37    1.43
   7  -3  -5   18.08    1.47
  -7   3   5   19.24    1.23
  -7   3   5   17.39    1.04
  -7   3   5   16.72    1.16
   6  -3  -5    4.59    0.78
   6  -3  -5    6.21    0.95
  -6   3   5    7.03    0.73
  -6   3   5    7.37    0.83
  -6   3   5    5.60    0.83
   5  -3  -5   71.51    2.72
  -5   3   5   72.30    2.16
  -5   3   5   70.31    3.01
  -5   3   5   71.61    2.03
  -5   3   5   71.19    2.29
   4  -3  -5   20.92    1.37
   4  -3  -5   21.74    1.20
  -4   3   5   23.41    1.68
  -4   3   5   21.60    1.28
  -4   3   5   20.14    1.03
  -4   3   5   20.49    1.13
   3  -3  -5    0.55    0.36
   3  -3  -5    0.31    0.45
   3  -3  -5    1.32    0.43
  -3   3   5    0.44    0.31
  -3   3   5    0.51    0.42
  -3   3   5    0.53    0.34
  -3   3   5    1.10    0.60
   2  -3  -5  167.53    3.87
   2  -3  -5  166.64    4.15
   2  -3  -5  169.46    3.63
  -2   3   5  165.40    3.63
  -2   3   5  162.46    3.79
  -2   3   5  165.54    3.98
  -2   3   5  167.62    4.48
   1  -3  -5    1.13    0.29
   1  -3  -5    0.84    0.32
   1  -3  -5    0.27    0.39
  -1   3   5    0.90    0.34
  -1   3   5    1.39    0.38
  -1   3   5   -0.19    0.32
   0  -3  -5    1.58    0.31
   0   3   5    1.40    0.54
   0   3   5    1.97    0.36
   0   3   5    1.44    0.29
   1   3   5   77.21    1.89
   1   3   5   77.56    1.64
   1   3   5   77.12    2.21
   3   3   5    0.67    0.43
   4   3   5    5.49    1.52
   5   3   5    4.07    1.35
   5   3   5    5.63    1.11
  -6  -3  -5    1.94    1.16
   6   3   5    2.43    1.28
   6   3   5    0.11    0.51
  -7  -3  -5    1.60    1.29
   7   3   5    0.31    1.14
  -8  -3  -5    1.70    1.41
   8   3   5    3.09    0.70
   8   3   5    3.05    1.38
   8   3   5    1.47    0.54
   9   3   5    0.34    1.14
   9   3   5    2.33    0.77
   9   3   5    1.74    0.60
  10   3   5    4.31    0.93
  10   3   5    1.36    1.27
  11   3   5    1.53    1.34
  11   3   5    0.20    0.76
  12   3   5    5.21    1.76
  10  -4  -5    0.22    0.87
   9  -4  -5    9.68    1.33
   8  -4  -5    0.54    0.69
  -8   4   5    0.60    0.60
  -8   4   5    1.20    0.62
  -8   4   5    0.36    0.45
   7  -4  -5    5.43    1.00
  -7   4   5    5.51    0.82
  -7   4   5    5.41    0.69
   6  -4  -5  113.15    3.44
   6  -4  -5  106.85    3.18
  -6   4   5  108.58    3.05
  -6   4   5  106.99    2.85
   5  -4  -5    7.82    0.89
   5  -4  -5    9.44    0.99
  -5   4   5    9.14    0.93
  -5   4   5    9.62    1.02
  -5   4   5    9.18    0.79
  -5   4   5    9.44    1.43
   4  -4  -5    2.95    0.58
   4  -4  -5    4.49    0.69
   4  -4  -5    6.30    0.76
  -4   4   5    4.79    1.09
  -4   4   5    4.03    0.69
  -4   4   5    4.68    0.65
   3  -4  -5   16.06    1.02
   3  -4  -5   16.08    0.96
   3  -4  -5   15.60    0.97
  -3   4   5   15.94    1.54
  -3   4   5   17.30    1.09
  -3   4   5   14.70    0.99
   2  -4  -5   48.83    1.68
   2  -4  -5   51.96    1.62
   2  -4  -5   52.44    1.57
  -2   4   5   50.67    1.59
  -2   4   5   50.16    1.76
  -2   4   5   50.67    2.26
  -2   4   5   51.21    1.73
   1  -4  -5   42.69    1.44
   1  -4  -5   43.81    1.29
  -1   4   5   43.74    1.37
  -1   4   5   43.05    1.50
   0  -4  -5    0.22    0.27
   0   4   5    0.24    0.30
   0   4   5    0.11    0.27
   0   4   5    0.10    0.53
  -1  -4  -5   93.57    2.24
   1   4   5   99.78    2.19
   1   4   5   99.10    2.41
   1   4   5   97.15    2.88
   2   4   5    1.20    0.31
   2   4   5    1.55    0.53
   3   4   5   14.66    0.68
   3   4   5   15.57    1.02
   4   4   5    7.60    1.39
   4   4   5    6.37    1.73
   4   4   5    6.72    0.50
   5   4   5    6.49    0.55
   5   4   5    7.65    1.87
   5   4   5    7.86    1.35
   6   4   5   -0.55    0.78
   6   4   5   -0.98    1.14
   7   4   5   19.19    1.35
   7   4   5   20.54    2.58
   7   4   5   18.61    1.00
  -8  -4  -5    2.21    1.38
   8   4   5   -0.03    0.43
   8   4   5   -0.02    0.61
   8   4   5    1.47    1.33
   9   4   5    4.40    0.91
   9   4   5    2.90    1.66
  10   4   5    3.41    1.55
  10   4   5    2.31    0.83
  11   4   5    4.57    1.10
  11   4   5    5.31    1.84
  12   4   5   -0.56    1.45
  10  -5  -5    0.39    0.95
   9  -5  -5    0.28    0.84
   8  -5  -5    0.46    0.70
  -8   5   5    0.79    0.46
  -8   5   5    0.51    0.62
   7  -5  -5   12.76    1.30
  -7   5   5   12.51    0.99
  -7   5   5   13.85    1.24
   6  -5  -5   11.85    1.19
  -6   5   5   12.44    1.15
  -6   5   5   11.80    0.96
   5  -5  -5    1.15    0.56
   5  -5  -5    0.26    0.38
   5  -5  -5    0.59    0.61
  -5   5   5    1.03    0.47
  -5   5   5    0.49    0.53
   4  -5  -5    5.83    0.80
   4  -5  -5    4.60    0.78
   4  -5  -5    4.55    0.75
  -4   5   5    5.55    1.15
  -4   5   5    4.63    0.75
   3  -5  -5    8.65    0.88
   3  -5  -5    9.86    0.93
   3  -5  -5   10.84    0.85
  -3   5   5   12.49    1.52
  -3   5   5    9.49    0.96
  -3   5   5    9.87    0.99
   2  -5  -5    8.81    0.83
   2  -5  -5    9.28    0.74
   2  -5  -5    9.67    0.84
  -2   5   5   10.80    0.89
  -2   5   5    9.44    0.88
  -2   5   5    9.61    0.93
   1  -5  -5   -0.36    0.28
   1  -5  -5    0.37    0.33
   1  -5  -5    0.47    0.32
  -1   5   5   -0.12    0.62
  -1   5   5   -0.27    0.32
  -1   5   5    0.15    0.35
   0  -5  -5   41.94    1.41
   0  -5  -5   43.41    1.18
   0   5   5   41.88    1.50
   0   5   5   45.96    2.13
   0   5   5   43.37    1.41
  -1  -5  -5   15.75    0.76
   1   5   5   15.57    1.32
   1   5   5   15.64    0.85
   1   5   5   15.92    0.79
  -2  -5  -5    0.56    0.25
   2   5   5    1.23    0.65
   2   5   5    0.61    0.29
   2   5   5    0.55    0.31
   3   5   5  102.15    3.16
   3   5   5  100.93    2.24
   3   5   5   98.32    2.48
   4   5   5   16.18    0.82
   4   5   5   16.12    1.93
   5   5   5    0.68    0.33
   5   5   5    1.75    0.94
   5   5   5    0.17    1.23
   6   5   5    1.19    1.37
   6   5   5   -0.05    0.95
   6   5   5    1.17    0.39
   7   5   5   13.51    0.92
   7   5   5   16.81    2.52
   7   5   5   13.08    1.41
   8   5   5    3.80    0.65
   8   5   5    2.88    1.62
   8   5   5    5.40    1.04
   9   5   5   24.83    3.09
   9   5   5   24.60    1.80
  10   5   5    7.59    2.02
  10   5   5    4.43    1.06
  11   5   5   10.95    2.32
  11   5   5    9.65    1.43
  12   5   5   -0.91    1.57
   9  -6  -5   -0.53    0.78
   8  -6  -5    6.02    1.13
  -8   6   5    4.90    0.69
   7  -6  -5   13.54    1.38
  -7   6   5    9.73    1.10
  -7   6   5    9.46    0.92
   6  -6  -5   -0.21    0.58
  -6   6   5   -0.57    0.41
  -6   6   5    0.45    0.64
   5  -6  -5    9.00    1.14
   5  -6  -5   10.22    1.08
  -5   6   5   10.49    1.12
   4  -6  -5    7.57    0.91
   4  -6  -5    9.64    1.08
   4  -6  -5    8.96    1.06
  -4   6   5    8.18    0.97
   3  -6  -5    1.22    0.59
   3  -6  -5    2.22    0.57
   3  -6  -5    1.13    0.55
  -3   6   5    0.49    0.46
  -3   6   5    0.30    0.93
   2  -6  -5    1.75    0.54
   2  -6  -5    0.98    0.53
   2  -6  -5    0.91    0.44
  -2   6   5    1.85    0.53
  -2   6   5    1.49    0.55
  -2   6   5    1.10    0.52
  -2   6   5   -0.46    0.64
   1  -6  -5   10.30    0.84
   1  -6  -5   10.88    0.77
   1  -6  -5   10.84    0.85
  -1   6   5   12.33    0.95
  -1   6   5   10.52    0.96
  -1   6   5   11.55    1.53
   0  -6  -5   21.25    1.06
   0  -6  -5   20.85    0.85
   0   6   5   21.38    1.10
   0   6   5   20.01    1.85
   0   6   5   19.16    1.07
  -1  -6  -5    1.05    0.36
   1   6   5    1.38    0.83
   1   6   5    1.99    0.47
   1   6   5    1.69    0.46
  -2  -6  -5   21.15    0.89
   2   6   5   19.04    1.61
   2   6   5   20.52    1.04
   2   6   5   21.03    0.98
   3   6   5   93.63    3.28
   3   6   5   88.06    2.43
   3   6   5   90.93    2.30
   4   6   5   -0.15    0.31
   4   6   5    1.05    1.05
   4   6   5    0.22    0.32
   4   6   5   -0.41    0.83
   5   6   5    8.78    0.71
   5   6   5    9.55    1.67
   5   6   5    8.01    0.73
   6   6   5   23.71    3.09
   6   6   5   21.00    1.06
   7   6   5    2.08    0.54
   7   6   5    2.35    0.92
   7   6   5    2.17    0.52
   7   6   5    2.38    1.57
   8   6   5   -1.59    0.66
   8   6   5   -0.42    1.34
   9   6   5    0.18    0.80
   9   6   5    1.19    1.60
  10   6   5    2.87    1.06
  10   6   5    2.83    1.88
  11   6   5    0.30    0.90
  11   6   5   -0.25    1.42
  12   6   5   -0.18    1.69
   8  -7  -5    1.13    0.84
  -8   7   5    2.52    0.60
   7  -7  -5   -0.29    0.68
  -7   7   5    0.18    0.72
  -7   7   5   -0.48    0.47
   6  -7  -5    2.24    0.78
  -6   7   5    5.06    0.96
  -6   7   5    4.93    0.76
   5  -7  -5    8.70    1.06
  -5   7   5    6.02    1.01
   4  -7  -5    0.98    0.59
   4  -7  -5    1.22    0.69
  -4   7   5    1.40    0.68
   3  -7  -5    8.25    0.90
   3  -7  -5    7.39    0.95
  -3   7   5    7.35    1.44
  -3   7   5    7.75    1.01
   2  -7  -5    0.48    0.53
   2  -7  -5    0.61    0.45
  -2   7   5   -0.82    0.85
  -2   7   5   -0.17    0.49
   1  -7  -5   27.99    1.35
   1  -7  -5   31.28    1.44
   1  -7  -5   31.29    1.27
  -1   7   5   30.44    1.50
  -1   7   5   28.74    2.26
   0  -7  -5    0.59    0.42
   0  -7  -5    0.08    0.36
   0  -7  -5    0.25    0.34
   0   7   5    0.82    0.50
   0   7   5    0.35    0.89
   0   7   5   -0.02    0.40
  -1  -7  -5    1.69    0.46
   1   7   5    1.49    0.53
   1   7   5    2.25    1.00
   1   7   5    1.92    0.51
  -2  -7  -5   66.94    1.98
   2   7   5   68.15    2.12
   2   7   5   69.89    2.19
   2   7   5   71.73    3.13
   3   7   5   15.37    0.99
   3   7   5   13.89    0.96
   4   7   5    0.83    0.41
   4   7   5    0.89    0.50
   4   7   5   -0.11    0.99
   4   7   5   -0.52    1.38
   5   7   5   31.33    1.37
   5   7   5   29.84    3.52
   5   7   5   34.48    1.42
   6   7   5   36.42    1.53
   6   7   5   34.75    3.69
   6   7   5   37.95    1.52
   7   7   5    5.07    1.28
   7   7   5    4.80    1.89
   7   7   5    6.86    0.83
   8   7   5    4.97    1.22
   8   7   5    5.18    1.97
   9   7   5   15.78    1.83
   9   7   5   19.10    3.08
  10   7   5    1.80    1.77
  10   7   5    1.74    0.98
  11   7   5    2.70    1.11
  11   7   5    1.05    1.82
   8  -8  -5    1.20    0.91
  -8   8   5    0.39    0.50
   7  -8  -5    5.74    1.13
  -7   8   5    7.30    0.87
  -7   8   5    6.23    1.09
   6  -8  -5   -0.10    0.71
  -6   8   5   -0.18    0.76
  -6   8   5    1.26    0.63
   5  -8  -5    4.06    0.88
  -5   8   5    2.91    0.88
   4  -8  -5    1.37    0.67
   4  -8  -5    0.80    0.70
  -4   8   5   -0.22    0.68
   3  -8  -5    0.32    0.55
   3  -8  -5    0.13    0.56
  -3   8   5    0.12    0.67
   2  -8  -5   26.03    1.35
   2  -8  -5   25.26    1.46
  -2   8   5   26.88    2.65
  -2   8   5   24.02    1.54
   1  -8  -5    0.93    0.56
   1  -8  -5    0.39    0.46
  -1   8   5    2.46    1.13
  -1   8   5    1.16    0.67
   0  -8  -5    1.16    0.51
   0  -8  -5    1.64    0.48
   0   8   5    0.30    0.57
   0   8   5    3.04    1.13
  -1  -8  -5    3.50    0.44
   1   8   5    4.89    0.83
   1   8   5    2.58    1.18
   2   8   5   33.59    1.60
   3   8   5   15.45    2.78
   3   8   5   11.01    1.04
   4   8   5    8.67    0.96
   4   8   5    8.44    2.30
   5   8   5   64.65    4.54
   5   8   5   61.36    2.19
   6   8   5   11.45    1.10
   6   8   5   11.03    2.50
   7   8   5    3.90    0.82
   7   8   5    1.09    1.69
   7   8   5    4.96    1.36
   8   8   5   26.66    2.50
   8   8   5   16.61    2.84
   9   8   5    4.04    1.91
   9   8   5    1.26    1.13
  10   8   5    5.78    2.20
  10   8   5    5.22    1.46
  11   8   5   -0.67    1.72
   7  -9  -5    3.73    1.04
  -7   9   5    3.34    0.72
   6  -9  -5    4.15    0.96
  -6   9   5    3.53    1.02
  -6   9   5    3.65    0.76
   5  -9  -5   -0.63    0.62
  -5   9   5   -0.64    0.75
   4  -9  -5    0.58    0.69
   4  -9  -5    0.15    0.69
  -4   9   5   -0.47    0.72
   3  -9  -5    3.62    0.80
   3  -9  -5    3.72    0.90
  -3   9   5    3.82    0.98
   2  -9  -5    3.12    0.72
   2  -9  -5    4.47    0.87
  -2   9   5    3.12    0.88
   1  -9  -5    0.25    0.55
   1  -9  -5    0.14    0.48
  -1   9   5   -1.26    0.99
  -1   9   5   -0.52    0.65
   0  -9  -5    0.62    0.43
   0  -9  -5   -0.73    0.50
   0   9   5    0.26    0.66
  -1  -9  -5   12.84    0.77
  -1  -9  -5   13.48    0.90
   1   9   5   12.88    1.27
   2   9   5   -0.33    0.63
   3   9   5    5.28    0.98
   3   9   5    5.16    2.23
   4   9   5   31.57    1.71
   4   9   5   32.89    3.82
   5   9   5   14.87    1.35
   5   9   5   17.65    3.04
   6   9   5    0.03    1.68
   6   9   5    0.83    0.68
   7   9   5    2.33    1.79
   7   9   5   -1.53    1.02
   7   9   5   -1.09    0.59
   8   9   5   25.28    1.75
   8   9   5   24.10    2.57
   8   9   5   26.07    3.53
   9   9   5    0.04    1.18
   9   9   5    1.60    1.72
  10   9   5   -0.21    1.74
  10   9   5   -0.93    1.23
   6 -10  -5    0.59    0.88
  -6  10   5   -1.50    0.81
  -6  10   5   -0.15    0.59
   5 -10  -5    1.85    0.91
  -5  10   5    2.66    1.06
   4 -10  -5    1.06    0.76
  -4  10   5    0.60    0.92
   3 -10  -5    1.85    0.85
   3 -10  -5    2.69    0.81
  -3  10   5    2.28    1.02
   2 -10  -5    4.64    0.83
   2 -10  -5    6.10    1.02
  -2  10   5    6.69    1.21
   1 -10  -5    0.38    0.55
   1 -10  -5   -0.03    0.71
  -1  10   5   -0.47    0.72
   0 -10  -5   11.10    0.90
   0 -10  -5    9.65    1.06
   0  10   5   10.45    1.31
  -1 -10  -5    0.88    0.44
  -1 -10  -5    0.43    0.50
   1  10   5    0.31    0.73
   2  10   5   13.71    1.42
   2  10   5   12.58    2.77
   3  10   5   10.17    2.73
   3  10   5   22.51    1.65
   4  10   5   18.86    1.61
   4  10   5   19.45    3.30
   5  10   5    0.49    0.73
   5  10   5   -0.61    1.55
   6  10   5    9.95    1.30
   6  10   5    9.07    2.57
   7  10   5    2.21    1.96
   7  10   5    2.74    1.50
   7  10   5    2.33    0.92
   8  10   5    1.56    1.37
   8  10   5   -1.98    1.58
   8  10   5    0.30    0.84
   9  10   5    4.73    2.26
   9  10   5    3.00    1.49
  10  10   5    5.45    1.71
  10  10   5    9.91    3.06
   4 -11  -5    0.14    0.81
  -4  11   5   -0.62    0.95
   3 -11  -5    1.46    0.82
   3 -11  -5    0.44    0.96
  -3  11   5    0.03    0.96
   2 -11  -5    7.68    1.22
   2 -11  -5    8.08    1.04
  -2  11   5   10.39    1.53
   1 -11  -5   -0.37    0.58
   1 -11  -5    0.88    0.80
  -1  11   5    1.19    0.88
   0 -11  -5    4.93    0.89
   0 -11  -5    4.89    0.71
   0  11   5    4.91    1.14
  -1 -11  -5    1.64    0.51
   1  11   5    2.40    1.00
   1  11   5    4.03    2.30
   2  11   5    5.86    1.21
   2  11   5    4.99    2.25
   3  11   5    8.78    2.71
   3  11   5   10.67    1.46
   4  11   5    0.99    0.87
   4  11   5   -1.28    1.57
   5  11   5   -1.83    1.59
   5  11   5    2.49    1.01
   6  11   5   12.85    2.89
   6  11   5   13.36    1.61
   7  11   5    0.73    0.93
   7  11   5    0.53    1.40
   7  11   5   -1.26    1.64
   8  11   5    3.17    1.17
   8  11   5    3.66    2.14
   8  11   5    2.11    1.59
   9  11   5    6.52    1.87
   9  11   5    7.31    1.47
   9  11   5    4.97    2.32
   3 -12  -5   25.85    1.72
   3 -12  -5   25.39    2.06
  -3  12   5   21.85    2.12
   2 -12  -5    0.57    0.74
   2 -12  -5    3.02    1.07
  -2  12   5    3.50    1.17
   1 -12  -5   -1.55    0.79
   1 -12  -5    0.11    0.60
  -1  12   5   -1.33    0.88
   0 -12  -5    0.90    0.82
   0 -12  -5    0.71    0.63
   0  12   5    1.71    1.05
   1  12   5   -0.64    0.89
   1  12   5    1.14    2.20
   2  12   5    5.48    2.60
   2  12   5    5.58    1.29
   3  12   5   -1.07    0.84
   3  12   5   -3.97    1.74
   4  12   5    2.00    2.09
   4  12   5    0.99    1.07
   5  12   5   -0.10    0.95
   5  12   5   -2.22    1.79
   6  12   5   12.46    1.69
   6  12   5    7.08    2.04
   6  12   5    9.07    2.74
   7  12   5    1.70    2.02
   7  12   5    2.89    1.23
   7  12   5    1.48    1.62
   8  12   5   -0.39    1.01
   8  12   5   -0.08    1.62
   8  12   5    0.69    2.13
   1 -13  -5   -1.24    0.87
  -1  13   5    0.31    1.05
   0  13   5    4.04    1.28
   1  13   5    2.27    1.23
   2  13   5    1.01    2.44
   2  13   5    2.23    1.19
   3  13   5    4.67    1.38
   3  13   5    8.82    2.83
   4  13   5    1.36    2.39
   4  13   5    3.06    1.22
   5  13   5    4.31    1.39
   5  13   5    3.69    2.45
   6  13   5    2.87    2.41
   6  13   5    2.07    1.24
   7  13   5    4.60    1.39
   5  13  -6    1.05    1.09
  -5 -13   6    2.84    0.87
  -5 -13   6    4.03    1.19
   4  13  -6    1.79    1.12
  -4 -13   6    0.85    0.81
   3  13  -6    1.56    1.00
  -3 -13   6    0.86    0.82
   2  13  -6    9.58    1.39
  -2 -13   6    8.89    1.28
  -1 -13   6    0.01    0.79
   0 -13   6   -0.61    0.82
   8  12  -6    3.01    1.31
   8  12  -6    1.73    1.52
   7  12  -6   -1.21    1.25
   7  12  -6   -0.98    0.94
  -7 -12   6    0.33    0.63
  -7 -12   6   -0.62    0.83
   6  12  -6    9.06    1.52
  -6 -12   6    8.94    1.37
  -6 -12   6   11.59    1.15
   5  12  -6    3.28    1.17
  -5 -12   6    4.26    1.16
  -5 -12   6    4.88    0.98
   4  12  -6    0.06    0.94
  -4 -12   6    0.10    0.68
   3  12  -6   28.38    2.08
  -3 -12   6   29.96    1.78
   2  12  -6    0.88    0.92
  -2 -12   6    0.60    0.76
   1  12  -6   -0.30    0.77
  -1 -12   6    0.79    0.83
   0 -12   6    5.69    1.06
   1 -12   6    8.14    1.26
   2 -12   6   -0.04    0.88
   9  11  -6    7.04    1.91
   9  11  -6    5.80    1.49
   8  11  -6   -0.95    1.19
   8  11  -6   -0.11    1.00
  -8 -11   6    1.58    0.86
   7  11  -6    8.64    1.50
   7  11  -6    6.30    1.74
  -7 -11   6   10.14    1.05
  -7 -11   6    6.29    1.12
   6  11  -6    1.52    0.97
   6  11  -6    2.28    1.35
  -6 -11   6    1.61    0.71
  -6 -11   6    3.55    0.98
   5  11  -6    0.15    1.11
   5  11  -6   -0.78    0.87
  -5 -11   6    0.76    0.67
  -5 -11   6    0.57    0.84
   4  11  -6    7.69    1.34
  -4 -11   6    6.30    0.94
   3  11  -6    6.72    1.25
  -3 -11   6   11.83    1.20
   2  11  -6    1.51    0.89
  -2 -11   6    1.40    0.73
   1  11  -6    3.24    0.95
  -1 -11   6    2.65    0.83
   0  11  -6   13.29    1.07
   0  11  -6    9.90    1.18
   0 -11   6   10.34    1.18
   1 -11   6    4.93    1.08
   2 -11   6    0.24    0.81
   3 -11   6    7.20    1.24
   4 -11   6    0.65    0.94
  10  10  -6   -0.79    0.94
   9  10  -6    1.22    1.42
   9  10  -6   -1.13    0.97
   8  10  -6    7.71    1.83
   8  10  -6    8.11    1.54
  -8 -10   6    8.82    1.14
  -8 -10   6    8.16    0.86
   7  10  -6    3.95    1.50
   7  10  -6    7.51    1.38
  -7 -10   6    8.62    0.95
  -7 -10   6    6.11    1.09
   6  10  -6   -1.30    0.77
   6  10  -6    0.19    1.04
  -6 -10   6    0.78    0.60
  -6 -10   6    1.61    0.83
   5  10  -6    0.82    0.84
   5  10  -6    1.93    1.11
  -5 -10   6    2.85    0.72
  -5 -10   6    2.23    0.86
   4  10  -6   23.34    2.07
   4  10  -6   23.56    1.79
  -4 -10   6   21.34    1.71
  -4 -10   6   22.36    1.39
   3  10  -6    0.86    0.78
   3  10  -6    2.09    0.98
  -3 -10   6    0.61    0.64
   2  10  -6    6.68    1.09
  -2 -10   6    8.30    1.01
   1  10  -6   27.10    1.68
  -1 -10   6   25.09    1.54
   0  10  -6    9.49    1.07
   0  10  -6    8.75    0.83
   0 -10   6    7.38    1.06
   1 -10   6    1.05    0.79
   2 -10   6    9.68    1.26
   3 -10   6    2.05    0.94
   4 -10   6    0.06    0.88
   5 -10   6    1.02    1.05
  10   9  -6   -0.69    1.16
  10   9  -6    1.31    1.04
   9   9  -6    8.95    1.48
   9   9  -6    8.18    1.90
  -9  -9   6    6.09    0.81
   8   9  -6    4.41    1.19
   8   9  -6    6.11    1.74
  -8  -9   6    5.67    0.98
  -8  -9   6    6.16    0.77
   7   9  -6    1.93    0.92
   7   9  -6    0.79    1.11
  -7  -9   6    0.93    0.76
  -7  -9   6    1.74    0.58
   6   9  -6    1.24    0.85
   6   9  -6    0.49    0.99
  -6  -9   6    0.27    0.55
  -6  -9   6    0.03    0.63
   5   9  -6   24.55    2.19
   5   9  -6   30.25    1.87
  -5  -9   6   24.58    1.35
  -5  -9   6   25.29    1.68
   4   9  -6    4.66    1.00
   4   9  -6    5.09    1.20
  -4  -9   6    2.56    0.79
  -4  -9   6    5.59    0.82
   3   9  -6   -0.84    0.62
   3   9  -6    0.02    0.83
  -3  -9   6    0.92    0.67
  -3  -9   6    0.40    0.54
   2   9  -6   -0.74    0.63
   2   9  -6   -0.06    0.62
  -2  -9   6    0.59    0.53
   1   9  -6   10.12    0.90
   1   9  -6    8.00    1.01
  -1  -9   6    7.69    1.07
  -1  -9   6    9.97    0.98
   0   9  -6    8.19    0.97
   0   9  -6    9.38    0.82
   0  -9   6    9.49    1.07
   0  -9   6    8.24    1.13
   1  -9   6    7.10    0.98
   1  -9   6    6.50    1.07
   2  -9   6   39.72    2.12
   2  -9   6   38.44    1.92
   3  -9   6    0.21    0.74
   3  -9   6   -0.73    0.65
   4  -9   6    0.79    0.85
   4  -9   6    1.35    0.94
   5  -9   6   13.24    1.56
   5  -9   6   13.30    1.49
   6  -9   6    0.59    0.88
  11   8  -6    0.14    1.05
  10   8  -6    7.74    1.50
  10   8  -6    5.54    1.73
   9   8  -6    2.66    1.34
   9   8  -6   -0.02    0.88
  -9  -8   6    1.44    0.67
  -9  -8   6    1.42    0.57
   8   8  -6    0.70    0.80
   8   8  -6    0.51    1.05
  -8  -8   6   -0.08    0.44
  -8  -8   6    0.58    0.65
   7   8  -6    5.19    1.08
   7   8  -6    6.74    1.56
  -7  -8   6    5.56    0.92
  -7  -8   6    4.90    0.73
   6   8  -6    6.71    1.11
   6   8  -6    7.68    1.57
  -6  -8   6    7.55    1.07
  -6  -8   6    9.62    0.92
   5   8  -6    4.91    1.26
   5   8  -6    4.85    0.92
  -5  -8   6    4.71    0.88
  -5  -8   6    5.56    0.76
   4   8  -6    0.66    0.69
   4   8  -6   -0.06    0.82
  -4  -8   6    0.02    0.47
  -4  -8   6    0.17    0.58
   3   8  -6   10.36    1.38
   3   8  -6    7.74    1.01
  -3  -8   6    3.78    0.77
  -3  -8   6    7.51    0.83
  -3  -8   6    7.03    1.00
   2   8  -6    5.97    0.91
   2   8  -6    3.43    0.90
   2   8  -6    5.36    0.67
  -2  -8   6    4.44    0.86
  -2  -8   6    4.30    0.68
  -2  -8   6    4.42    0.82
   1   8  -6    0.84    0.45
   1   8  -6    1.96    0.64
   1   8  -6    0.37    0.59
  -1  -8   6    1.85    0.64
  -1  -8   6    1.03    0.51
   0   8  -6   26.74    1.12
   0   8  -6   23.91    1.31
   0  -8   6   23.77    1.55
   0  -8   6   26.14    1.41
   1  -8   6   38.56    1.74
   1  -8   6   41.73    1.98
   2  -8   6    5.57    0.88
   2  -8   6    7.14    1.02
   3  -8   6    0.68    0.70
   3  -8   6    1.25    0.73
   4  -8   6    0.02    0.75
   4  -8   6    1.10    0.75
   5  -8   6   29.76    1.85
   5  -8   6   30.40    1.92
   6  -8   6    0.67    0.83
   6  -8   6   -0.01    0.77
   7  -8   6    2.35    0.95
   7  -8   6    1.05    0.89
  11   7  -6    1.33    1.11
  11   7  -6    1.60    1.14
  11   7  -6    4.52    1.62
  10   7  -6    5.88    1.70
  10   7  -6    6.89    1.40
   9   7  -6    1.17    1.19
   9   7  -6   -1.34    0.76
  -9  -7   6    0.48    0.53
  -9  -7   6   -0.57    0.40
  -9  -7   6   -0.61    0.53
   8   7  -6    0.32    0.99
   8   7  -6    1.21    0.86
  -8  -7   6    0.74    0.63
  -8  -7   6    1.89    0.54
   7   7  -6    6.30    1.52
   7   7  -6    4.24    0.98
  -7  -7   6    5.70    0.88
  -7  -7   6    5.63    0.72
   6   7  -6    4.58    0.95
   6   7  -6    5.54    1.33
   6   7  -6    3.76    1.09
  -6  -7   6    4.04    0.66
  -6  -7   6    5.96    0.91
   5   7  -6    0.80    0.89
   5   7  -6    1.93    0.99
   5   7  -6    2.43    0.72
  -5  -7   6    2.00    0.54
  -5  -7   6    2.85    0.77
   4   7  -6    1.54    0.89
   4   7  -6    1.29    0.89
   4   7  -6    0.57    0.60
  -4  -7   6    0.98    0.47
  -4  -7   6    1.35    0.59
  -4  -7   6    0.84    0.57
   3   7  -6    9.52    1.32
   3   7  -6   10.86    1.36
   3   7  -6    8.22    0.98
   3   7  -6    9.68    0.84
  -3  -7   6   10.22    0.87
  -3  -7   6    9.22    1.01
   2   7  -6    5.59    0.63
   2   7  -6    6.90    1.16
   2   7  -6    4.37    0.74
   2   7  -6    4.52    0.89
  -2  -7   6    6.64    0.90
  -2  -7   6    6.11    0.86
  -2  -7   6    5.84    0.72
   1   7  -6    0.58    0.50
   1   7  -6   -0.29    0.33
   1   7  -6   -0.07    0.67
   1   7  -6   -0.27    0.44
  -1  -7   6    0.89    0.55
  -1  -7   6    0.10    0.51
  -1  -7   6    0.00    0.41
   0   7  -6   10.79    0.76
   0   7  -6   11.03    0.90
   0   7  -6    9.75    0.70
   0  -7   6   10.52    0.94
   0  -7   6    8.29    0.99
   1  -7   6   40.27    1.81
   1  -7   6   37.60    1.61
  -2   7  -6    0.50    0.71
   2  -7   6    0.34    0.55
   2  -7   6   -0.46    0.53
  -3   7  -6   -0.91    0.79
   3  -7   6    0.69    0.61
   3  -7   6    0.44    0.61
  -4   7  -6   19.03    2.09
   4  -7   6   20.39    1.40
   4  -7   6   18.24    1.44
   5  -7   6    1.26    0.71
   5  -7   6    2.14    0.78
   6  -7   6    7.02    1.05
   6  -7   6    6.65    1.08
   7  -7   6   10.40    1.34
   7  -7   6   11.52    1.35
   8  -7   6    2.94    1.10
   8  -7   6    5.26    1.14
  11   6  -6    8.18    1.50
  11   6  -6    9.88    2.13
  10   6  -6    1.22    1.06
  10   6  -6    1.84    0.94
  10   6  -6    1.07    1.16
   9   6  -6    9.13    1.81
   9   6  -6    6.91    1.29
  -9  -6   6   10.13    0.93
  -9  -6   6    8.60    0.95
   8   6  -6   13.52    1.98
   8   6  -6   11.95    1.42
  -8  -6   6   13.40    1.08
  -8  -6   6   12.99    1.17
  -8  -6   6   13.09    0.97
   7   6  -6   10.02    1.63
   7   6  -6   11.65    1.29
   7   6  -6   11.63    1.50
  -7  -6   6   10.80    0.91
  -7  -6   6   10.61    1.09
  -7  -6   6   10.28    1.52
   6   6  -6    6.61    1.33
   6   6  -6    5.36    0.89
   6   6  -6    4.45    1.06
  -6  -6   6    6.10    1.11
  -6  -6   6    6.28    0.71
  -6  -6   6    4.05    0.72
   5   6  -6    7.98    1.21
   5   6  -6    9.22    1.41
   5   6  -6    8.88    1.07
  -5  -6   6    5.79    1.00
  -5  -6   6    8.28    1.05
  -5  -6   6    8.69    0.94
  -5  -6   6    8.16    0.79
   4   6  -6   -0.26    0.64
   4   6  -6    0.14    0.53
   4   6  -6    0.12    0.38
   4   6  -6   -0.41    0.60
  -4  -6   6    0.21    0.45
  -4  -6   6    0.22    0.50
  -4  -6   6    0.34    0.38
   3   6  -6   19.29    1.58
   3   6  -6   18.10    1.47
   3   6  -6   19.19    1.20
   3   6  -6   18.65    0.97
  -3  -6   6   19.63    1.16
  -3  -6   6   16.77    1.83
   2   6  -6    1.42    0.67
   2   6  -6    1.55    0.77
   2   6  -6    0.88    0.49
   2   6  -6    1.38    0.41
  -2  -6   6    1.52    0.48
  -2  -6   6    2.52    0.62
  -2  -6   6    1.57    0.43
   1   6  -6    0.63    0.63
   1   6  -6    2.92    0.45
   1   6  -6    2.12    0.52
  -1  -6   6    2.07    0.54
  -1  -6   6    1.69    0.46
  -1  -6   6    2.25    0.56
   0   6  -6   43.91    1.46
   0   6  -6   44.69    1.46
   0   6  -6   46.14    1.28
   0   6  -6   41.55    2.08
   0  -6   6   44.30    1.78
   0  -6   6   46.82    1.72
   0  -6   6   40.55    1.54
  -1   6  -6    0.53    0.60
   1  -6   6   -0.47    0.44
   1  -6   6   -0.10    0.42
   1  -6   6    0.22    0.48
  -2   6  -6    1.60    0.73
   2  -6   6    2.37    0.58
   2  -6   6    2.57    0.64
  -3   6  -6   13.02    1.48
   3  -6   6   13.07    1.04
   3  -6   6   12.00    1.09
  -4   6  -6    6.26    1.29
   4  -6   6    6.33    0.83
   4  -6   6    6.83    0.90
  -5   6  -6   -1.00    0.93
   5  -6   6    1.45    0.71
   5  -6   6    0.52    0.60
  -6   6  -6   11.81    1.97
   6  -6   6   13.10    1.26
   6  -6   6   13.31    1.23
   7  -6   6   21.64    1.58
   7  -6   6   23.85    1.72
   8  -6   6    0.09    0.78
   8  -6   6    0.79    0.84
   9  -6   6    1.12    0.96
  12   5  -6    2.18    1.16
  11   5  -6    3.23    1.10
  11   5  -6    3.23    1.46
  10   5  -6   -0.05    0.85
  10   5  -6    3.70    1.33
   9   5  -6   19.31    1.78
   9   5  -6   22.61    2.49
   9   5  -6   16.83    1.68
  -9  -5   6   16.27    1.14
  -9  -5   6   14.53    2.07
  -9  -5   6   15.28    1.12
   8   5  -6   14.37    1.69
   8   5  -6   13.32    1.84
   8   5  -6   16.66    1.55
  -8  -5   6   15.65    0.99
  -8  -5   6   17.17    1.17
  -8  -5   6   15.60    1.15
  -8  -5   6   15.63    1.94
   7   5  -6   20.38    1.50
   7   5  -6   24.25    1.80
   7   5  -6   23.44    2.05
  -7  -5   6   21.14    1.90
  -7  -5   6   23.81    1.29
  -7  -5   6   22.82    1.14
  -7  -5   6   22.33    1.31
   6   5  -6  115.07    3.32
   6   5  -6  101.62    4.06
   6   5  -6   97.99    3.66
  -6  -5   6  111.62    3.48
  -6  -5   6  113.74    2.83
  -6  -5   6  114.84    3.85
  -6  -5   6  110.50    3.03
   5   5  -6   -0.57    0.61
   5   5  -6   -0.31    0.44
   5   5  -6   -0.26    0.58
   5   5  -6    0.09    0.37
  -5  -5   6    0.15    0.37
  -5  -5   6    0.99    0.53
  -5  -5   6    0.09    0.42
  -5  -5   6   -0.25    0.58
   4   5  -6    0.08    0.31
   4   5  -6    0.09    0.63
   4   5  -6    0.07    0.44
   4   5  -6    1.68    0.71
  -4  -5   6   -0.17    0.15
  -4  -5   6   -0.26    0.46
  -4  -5   6    0.50    0.45
  -4  -5   6    1.26    0.51
  -4  -5   6    0.82    0.80
   3   5  -6    4.03    0.84
   3   5  -6    2.87    0.45
   3   5  -6    3.87    0.83
   3   5  -6    3.96    0.64
  -3  -5   6    3.10    0.63
  -3  -5   6    3.69    0.53
  -3  -5   6    2.49    0.53
  -3  -5   6    3.56    1.02
   2   5  -6    1.53    0.58
   2   5  -6    1.25    0.58
   2   5  -6    1.30    0.46
   2   5  -6    1.54    0.36
  -2  -5   6    2.15    0.84
  -2  -5   6    1.06    0.47
  -2  -5   6    1.58    0.40
  -2  -5   6    1.46    0.45
   1   5  -6    4.85    0.87
   1   5  -6    5.82    0.51
   1   5  -6    4.46    0.57
  -1  -5   6    5.63    0.95
  -1  -5   6    5.03    0.65
  -1  -5   6    6.37    0.64
  -1  -5   6    1.81    0.79
  -1  -5   6    5.49    0.69
   0   5  -6    5.39    0.81
   0   5  -6    7.84    0.48
   0   5  -6    7.15    0.63
   0  -5   6    7.13    0.70
   0  -5   6    8.63    0.72
   0  -5   6    5.88    0.89
   0  -5   6    8.35    0.80
  -1   5  -6   12.05    1.04
  -1   5  -6   13.00    1.13
   1  -5   6   12.55    0.85
   1  -5   6   13.75    0.87
   1  -5   6   12.00    0.92
  -2   5  -6   14.29    1.30
   2  -5   6   14.29    1.02
   2  -5   6   15.27    0.93
  -3   5  -6   33.71    2.01
   3  -5   6   32.73    1.33
   3  -5   6   32.96    1.49
  -4   5  -6    0.16    0.83
   4  -5   6    0.18    0.50
   4  -5   6    1.50    0.91
   4  -5   6   -0.30    0.43
  -5   5  -6    1.61    1.09
   5  -5   6    1.99    0.65
   5  -5   6    0.72    0.53
  -6   5  -6   13.83    2.09
   6  -5   6   17.53    1.23
   6  -5   6   21.32    1.43
   7  -5   6   10.73    1.20
   7  -5   6   10.24    1.09
   8  -5   6   -0.56    0.74
   9  -5   6    6.35    1.19
  12   4  -6    2.20    1.16
  11   4  -6    1.17    1.24
  11   4  -6    1.81    0.95
  10   4  -6   14.94    2.18
  10   4  -6   15.91    1.68
   9   4  -6   12.68    1.92
   9   4  -6    8.83    1.25
  -9  -4   6    9.97    0.96
  -9  -4   6    9.76    0.84
  -9  -4   6    9.33    1.79
  -9  -4   6    9.57    0.93
   8   4  -6   14.20    1.85
   8   4  -6   13.04    1.37
   8   4  -6    9.92    1.22
   8   4  -6   12.86    1.50
  -8  -4   6   13.70    0.93
  -8  -4   6   10.99    1.04
  -8  -4   6   13.29    1.11
  -8  -4   6   11.22    1.62
   7   4  -6    3.80    0.94
   7   4  -6    4.16    0.85
   7   4  -6    5.84    1.29
   7   4  -6    3.13    0.83
  -7  -4   6    4.56    0.65
  -7  -4   6    2.99    0.98
  -7  -4   6    3.64    0.69
  -7  -4   6    3.32    0.64
   6   4  -6   26.50    1.49
   6   4  -6   27.98    1.64
   6   4  -6   27.68    1.98
  -6  -4   6   24.55    1.75
  -6  -4   6   25.22    1.13
  -6  -4   6   27.11    1.62
  -6  -4   6   27.14    1.32
   5   4  -6    5.48    0.94
   5   4  -6    6.15    0.81
   5   4  -6    5.47    0.62
   5   4  -6    4.47    0.99
  -5  -4   6    5.58    0.82
  -5  -4   6    5.41    0.62
  -5  -4   6    4.68    0.67
  -5  -4   6    4.29    0.86
   4   4  -6    3.38    0.48
   4   4  -6    3.56    0.85
   4   4  -6    3.27    0.75
   4   4  -6    1.99    0.54
   4   4  -6    2.69    0.56
  -4  -4   6    3.48    0.96
  -4  -4   6    2.48    0.57
  -4  -4   6    2.64    0.53
  -4  -4   6    3.00    0.62
   3   4  -6    8.32    1.05
   3   4  -6    8.06    0.62
   3   4  -6    8.59    0.98
   3   4  -6    8.11    0.78
  -3  -4   6    7.14    1.11
  -3  -4   6    7.65    0.82
  -3  -4   6    8.08    0.68
  -3  -4   6    7.80    0.76
   2   4  -6   41.98    1.80
   2   4  -6   43.65    1.26
   2   4  -6   40.22    1.41
   2   4  -6   42.04    1.76
  -2  -4   6   40.63    1.32
  -2  -4   6   37.71    2.01
  -2  -4   6   40.68    1.39
   1   4  -6    3.44    0.38
   1   4  -6    2.87    0.44
   1   4  -6    1.34    0.43
   1   4  -6    2.23    0.58
  -1  -4   6    2.47    0.79
  -1  -4   6    1.69    0.45
  -1  -4   6    2.69    0.44
  -1  -4   6    2.93    0.71
  -1  -4   6    3.11    0.45
   0   4  -6   57.52    1.97
   0   4  -6   59.25    1.73
   0  -4   6   57.71    1.62
   0  -4   6   53.87    1.62
   0  -4   6   59.75    2.47
   0  -4   6   57.98    1.96
   0  -4   6   58.93    1.82
  -1   4  -6    2.41    0.53
  -1   4  -6    2.78    0.68
   1  -4   6    2.47    0.48
   1  -4   6    3.37    0.49
  -2   4  -6   73.60    2.71
   2  -4   6   72.68    1.93
   2  -4   6   77.20    2.14
  -3   4  -6   -0.08    0.67
   3  -4   6    0.31    0.34
   3  -4   6   -0.48    0.34
  -4   4  -6   22.92    1.94
   4  -4   6   25.27    1.23
   4  -4   6   24.72    1.09
   4  -4   6   23.39    1.82
  -5   4  -6    8.80    1.56
   5  -4   6    9.83    0.82
   5  -4   6    8.89    1.30
   5  -4   6    9.67    0.92
  -6   4  -6   -0.58    1.01
   6  -4   6    0.36    0.54
   6  -4   6   -0.27    0.45
  -7   4  -6    0.13    1.18
   7  -4   6   -0.47    0.50
   7  -4   6    0.17    0.57
   8  -4   6    0.33    0.62
   9  -4   6   13.62    1.37
  12   3  -6    3.69    1.30
  11   3  -6   -0.75    1.06
  11   3  -6    2.12    0.98
  10   3  -6    2.20    0.91
  10   3  -6    1.60    1.18
   9   3  -6    4.71    0.97
   9   3  -6    6.50    1.28
   9   3  -6    5.31    1.41
  -9  -3   6    6.07    0.70
  -9  -3   6    5.99    0.77
  -9  -3   6    5.44    0.75
   8   3  -6    1.02    0.62
   8   3  -6    0.50    0.84
   8   3  -6    0.10    0.66
  -8  -3   6    0.22    0.49
  -8  -3   6    0.50    0.51
  -8  -3   6   -0.71    0.78
  -8  -3   6    0.37    0.43
   7   3  -6    4.11    0.81
   7   3  -6    4.16    1.11
   7   3  -6    4.77    0.92
  -7  -3   6    5.42    0.73
  -7  -3   6    3.79    1.04
  -7  -3   6    5.09    0.65
  -7  -3   6    5.69    0.74
   6   3  -6   10.65    1.05
   6   3  -6   14.57    1.59
   6   3  -6   10.45    1.05
  -6  -3   6   14.64    0.86
  -6  -3   6   12.26    0.93
  -6  -3   6   10.97    0.95
  -6  -3   6   15.33    1.30
   5   3  -6    5.12    1.01
   5   3  -6    4.49    0.80
   5   3  -6    5.59    0.74
   5   3  -6    4.40    0.56
  -5  -3   6    5.77    0.84
  -5  -3   6    5.31    0.57
  -5  -3   6    4.29    0.59
   4   3  -6   49.33    1.99
   4   3  -6   46.27    1.71
   4   3  -6   50.14    1.49
   4   3  -6   46.24    1.69
   4   3  -6   44.88    2.14
   4   3  -6   45.40    1.67
  -4  -3   6   45.78    2.21
  -4  -3   6   49.86    1.87
  -4  -3   6   50.36    1.59
   3   3  -6   18.00    0.94
   3   3  -6   17.20    1.15
   3   3  -6   16.27    1.21
   3   3  -6   17.23    0.96
   3   3  -6   16.45    0.93
   3   3  -6   16.55    0.77
  -3  -3   6   17.26    1.04
  -3  -3   6   16.79    0.81
  -3  -3   6   16.74    0.86
  -3  -3   6   14.73    1.40
   2   3  -6    1.12    0.28
   2   3  -6    1.29    0.51
   2   3  -6    1.44    0.56
   2   3  -6    1.48    0.39
  -2  -3   6    0.84    0.32
  -2  -3   6   -0.16    0.23
  -2  -3   6    0.98    0.33
  -2  -3   6    1.34    0.64
   1   3  -6   27.70    1.27
  -1  -3   6   29.08    1.56
  -1  -3   6   27.96    0.99
  -1  -3   6   25.65    1.11
  -1  -3   6   27.53    0.96
  -1  -3   6   28.22    1.36
   0   3  -6   29.53    1.18
   0  -3   6   27.82    1.02
   0  -3   6   26.86    1.50
   0  -3   6   29.99    1.12
   0  -3   6   28.16    1.19
   0  -3   6   28.03    0.96
   0  -3   6   26.85    0.93
  -1   3  -6    1.99    0.39
   1  -3   6    1.23    0.36
   1  -3   6    1.46    0.64
   1  -3   6    1.63    0.33
   1  -3   6    2.55    0.41
  -2   3  -6    7.35    1.08
   2  -3   6    8.15    0.54
   2  -3   6    7.07    0.61
  -3   3  -6   15.79    1.56
   3  -3   6   14.96    0.69
   3  -3   6   14.89    0.81
  -4   3  -6   21.68    1.90
   4  -3   6   25.74    1.09
  -5   3  -6   16.13    1.95
   5  -3   6   18.98    1.03
   5  -3   6   19.70    1.61
  -6   3  -6    2.07    1.19
   6  -3   6    1.53    0.52
   6  -3   6    2.04    0.89
  -7   3  -6   16.12    2.28
   7  -3   6   16.92    1.20
   8  -3   6    8.61    1.00
   9  -3   6   -0.91    0.57
  10  -3   6    5.80    1.10
  12   2  -6   -0.59    0.88
  11   2  -6    6.13    1.64
  11   2  -6    5.13    1.18
  10   2  -6    4.71    1.08
  10   2  -6    6.20    1.54
   9   2  -6    0.69    0.71
   9   2  -6    0.06    0.67
   9   2  -6    1.01    1.04
  -9  -2   6    1.07    0.53
  -9  -2   6    0.27    0.44
  -9  -2   6    0.24    0.49
   8   2  -6   17.83    1.40
   8   2  -6   18.88    2.03
   8   2  -6   20.43    1.62
  -8  -2   6   19.56    1.14
  -8  -2   6   17.18    1.18
  -8  -2   6   19.64    1.07
   7   2  -6    7.87    1.10
   7   2  -6    7.90    0.98
   7   2  -6   10.83    1.52
  -7  -2   6    9.36    0.81
  -7  -2   6    9.98    0.94
  -7  -2   6    9.10    0.85
   6   2  -6    8.77    0.80
   6   2  -6    8.01    0.89
   6   2  -6    8.47    0.99
  -6  -2   6    9.85    0.76
  -6  -2   6    9.49    1.15
  -6  -2   6   10.12    0.92
  -6  -2   6    8.67    0.80
   5   2  -6    8.40    0.66
   5   2  -6    9.63    0.94
   5   2  -6   10.18    1.07
  -5  -2   6    8.78    0.74
  -5  -2   6    9.25    1.00
  -5  -2   6    8.08    0.67
   4   2  -6   68.01    2.62
   4   2  -6   71.75    2.19
   4   2  -6   66.50    2.05
   4   2  -6   71.19    2.36
   4   2  -6   71.54    1.85
  -4  -2   6   71.29    1.96
  -4  -2   6   68.86    2.31
  -4  -2   6   66.75    2.55
   3   2  -6   15.76    0.90
   3   2  -6   14.40    1.16
   3   2  -6   15.80    1.03
   3   2  -6   14.14    0.83
  -3  -2   6   16.00    0.76
  -3  -2   6   15.23    0.98
  -3  -2   6   16.83    1.22
  -3  -2   6   14.81    0.76
   2   2  -6    0.37    0.30
   2   2  -6    1.15    0.35
   2   2  -6    0.62    0.49
   2   2  -6    0.38    0.36
  -2  -2   6    1.03    0.30
  -2  -2   6    0.76    0.29
  -2  -2   6   -0.03    0.45
  -2  -2   6    0.87    0.38
   1   2  -6   68.04    1.53
   1   2  -6   66.23    1.89
[truncated: 250,650 more chars]
